# Supplementary material
Source: PubMed Central journal article supplement (PMC10204624)
Supplement: jcm.00014-23-s0001.pdf [file jcm.00014-23-s0001.pdf]

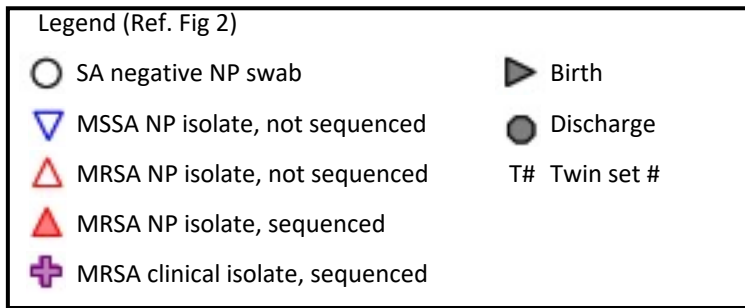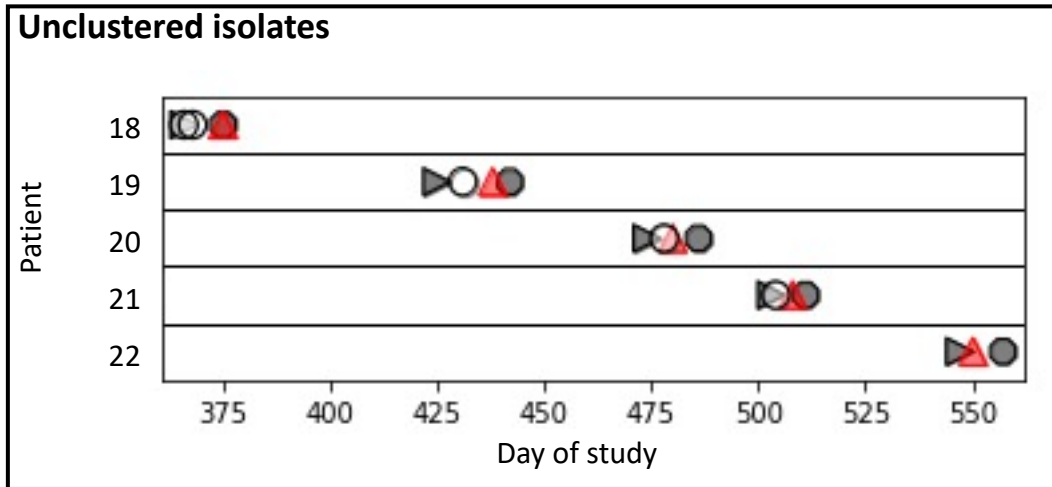

**Figure S1. Unclustered patient isolates that were not linked to any in the NCBI Pathogen Detection program at the time of analyses.** MLST and SCCmec types are as follows: patient 18, MLST 8, SCCmec type IVg(2B); patient 19, MLST 8, SCCmec type IVa(2B); patient 20, MLST 87, SCCmec type IVa(2B); patient 21, MLST 5, SCCmec type IVa(2B); patient 22, MLST 6, SCCmec type IVa(2B). Refer to Figure 1 for the context of these isolates relative to those in other SNP clusters.

Seed: PDT000655909.1, patient 6  
(cluster 2) day 550

■ BWH Isolate  
■ BWH Isolate and Seed

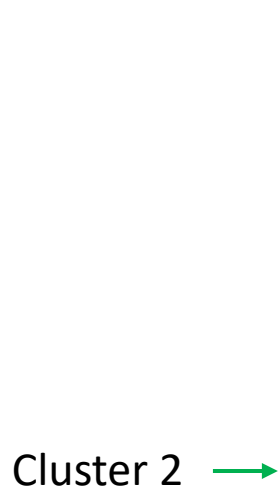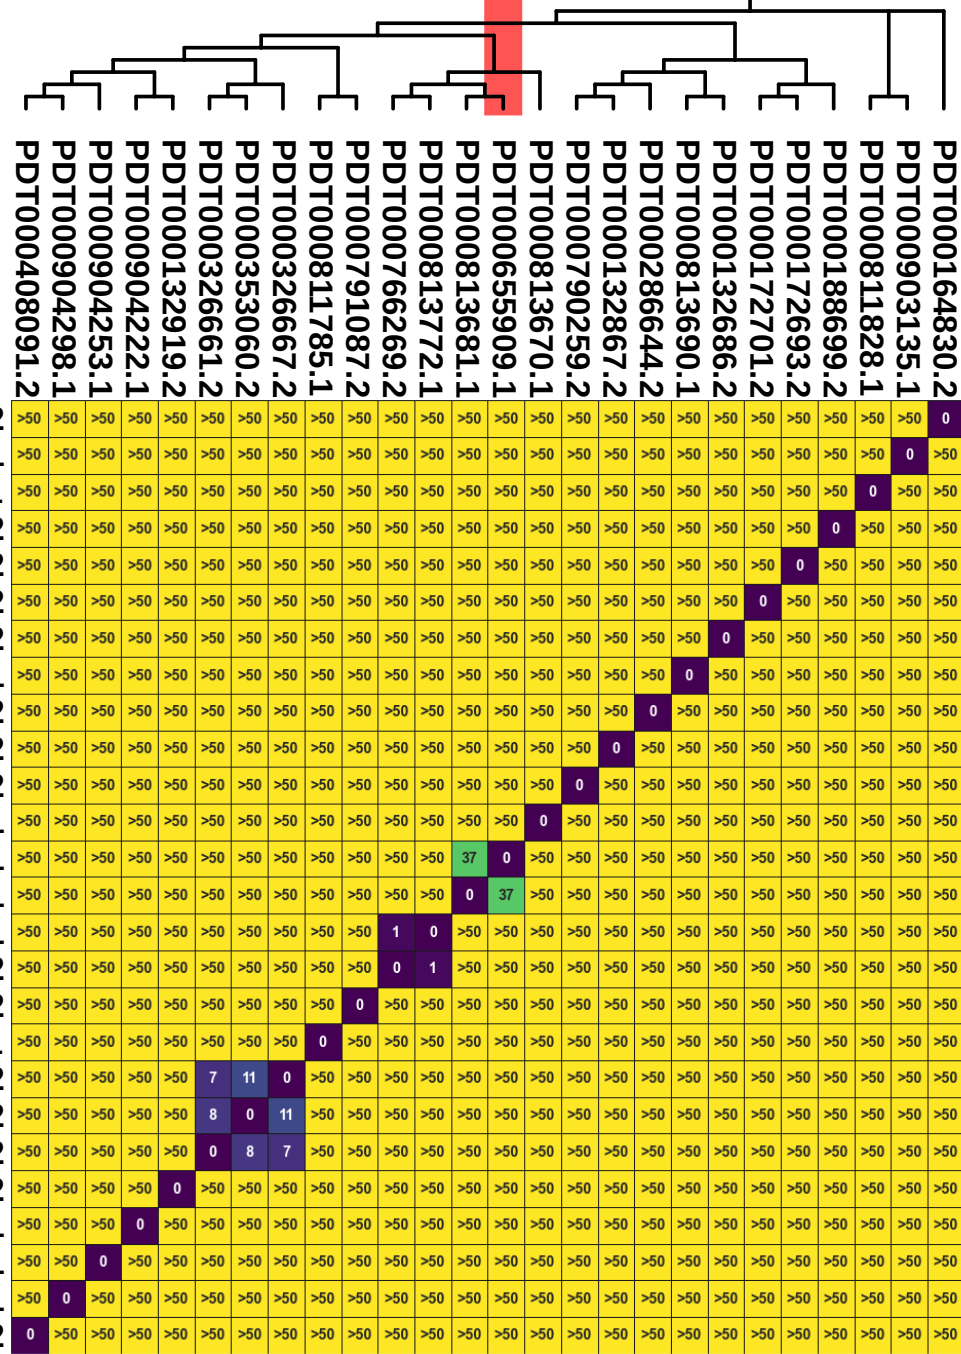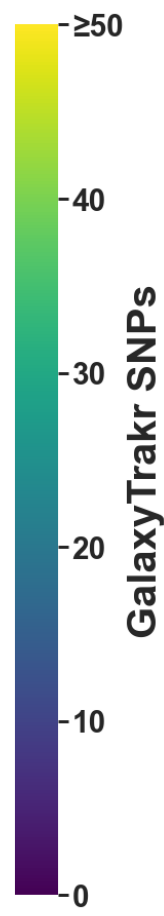

**Figure S2. Phylogenetic context of cluster 2.** Isolates from our institution are highlighted in light red, with the seed shown in darker red. Phylogeny branch lengths are unweighted. NCBI SNP Clusters are outlined in green. Numbers of SNPs are indicated by number and by color from dark purple (low) to light yellow (high).

Seed: PDT000537205.1, patient 17  
(cluster 6) day 215

BWH Isolate  
 BWH Isolate and Seed

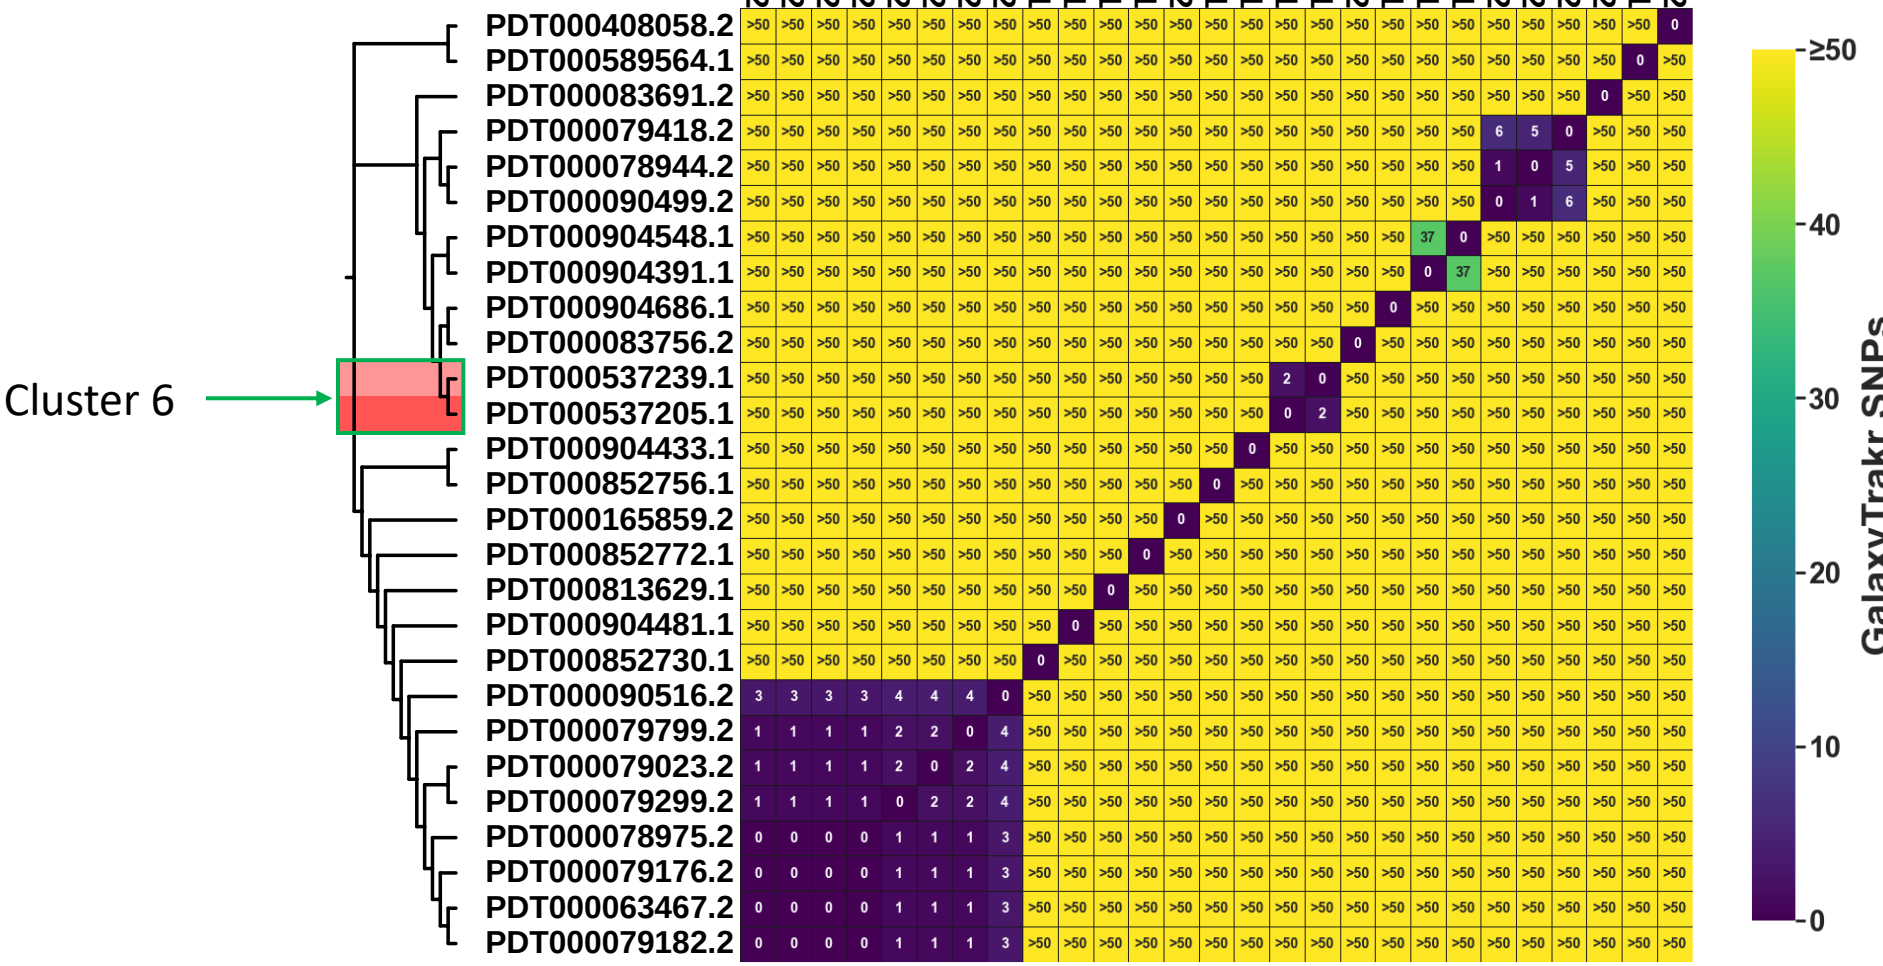

**Figure S3. Phylogenetic context of cluster 6.** Isolates from our institution are highlighted in light red, with the seed shown in darker red. NCBI SNP Clusters are outlined in green. Numbers of SNPs are indicated by number and by color from dark purple (low values) to light yellow (high values).







Seed: PDT000551279.1, patient  
13 (cluster 4) day 361

BWH Isolate  
BWH Isolate and Seed

Cluster 4 →

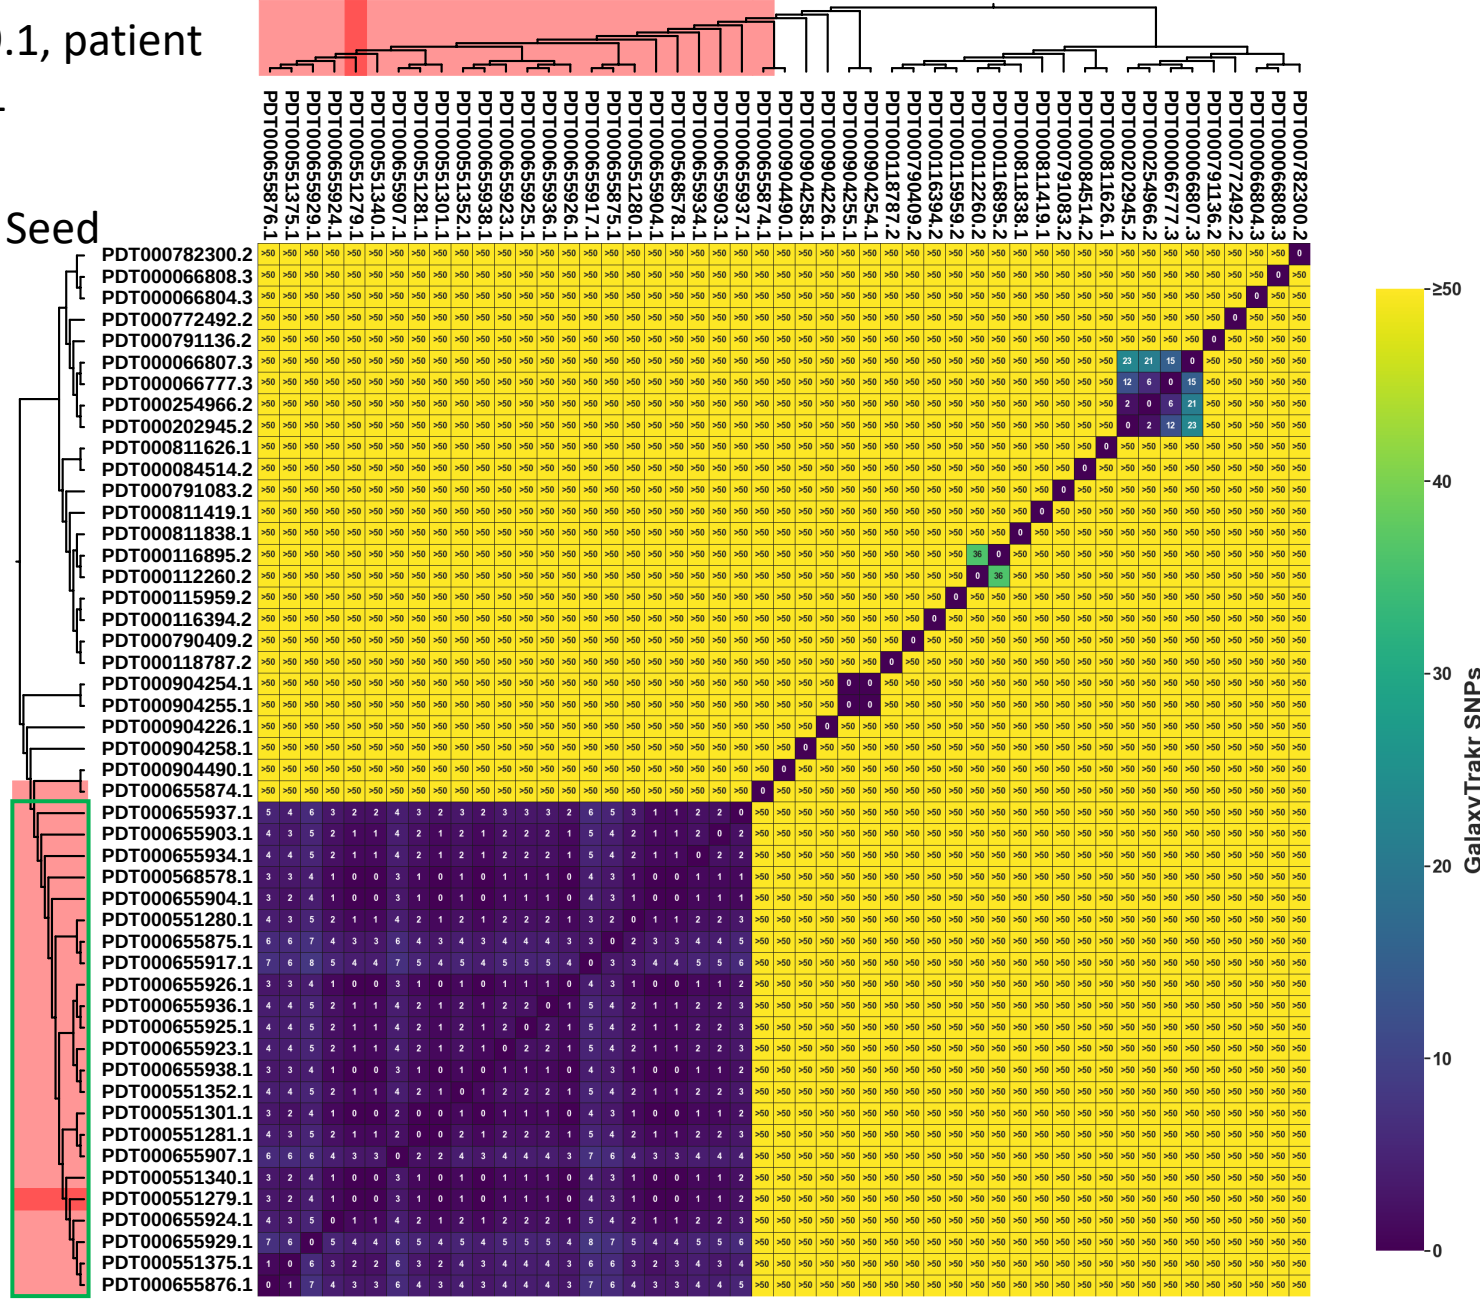

Figure S6. Phylogenetic context of cluster 4. Isolates from our institution are highlighted in light red, with the seed shown in darker red. NCBI SNP Clusters are outlined in green. Numbers of SNPs are indicated by number and by color from dark purple (low values) to light yellow (high values).



Seed: PDT000655928.1, patient 18  
(non-clustered) day 375

■ BWH Isolate  
■ BWH Isolate and Seed

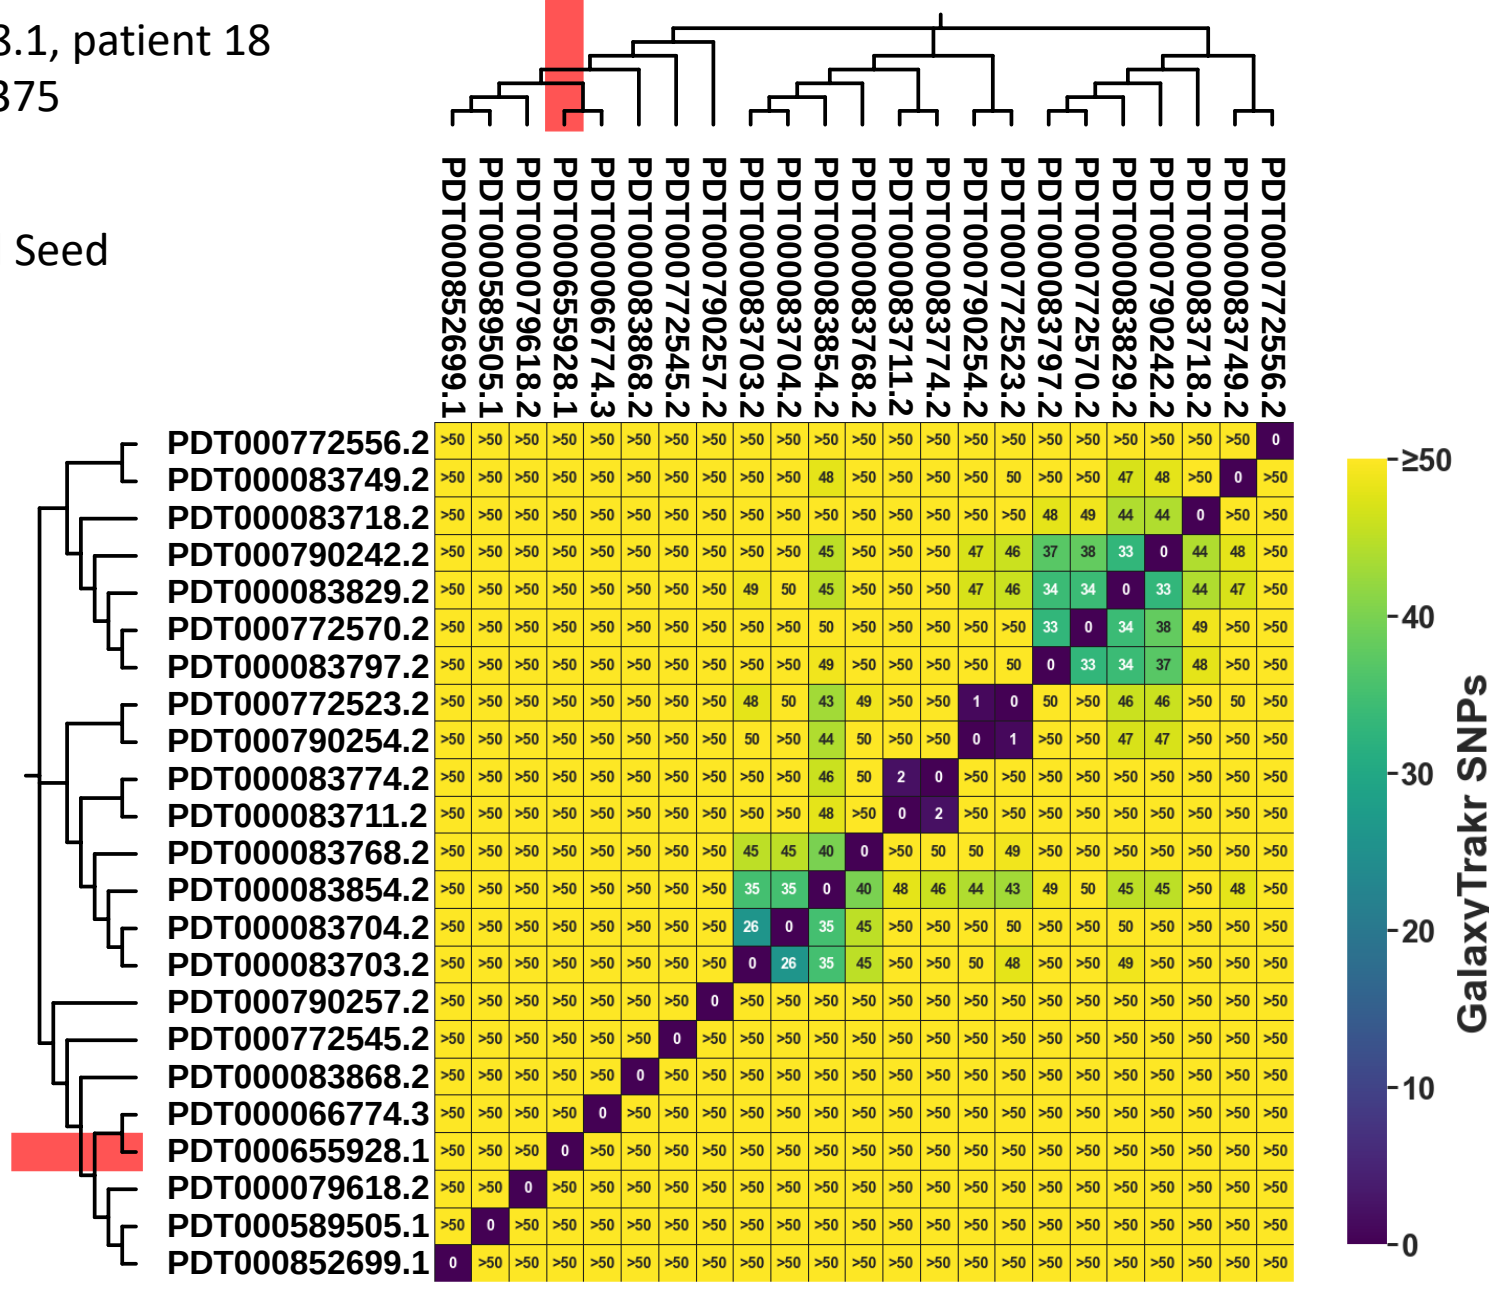

**Figure S8. Phylogenetic context of PDT000655928.1.** Isolates from our institution are highlighted in light red, with the seed shown in darker red. NCBI SNP Clusters are outlined in green. Numbers of SNPs are indicated by number and by color from dark purple (low values) to light yellow (high values).



Seed: PDT000655922.1, patient 19  
(non-clustered) day 438

■ BWH Isolate  
■ BWH Isolate and Seed

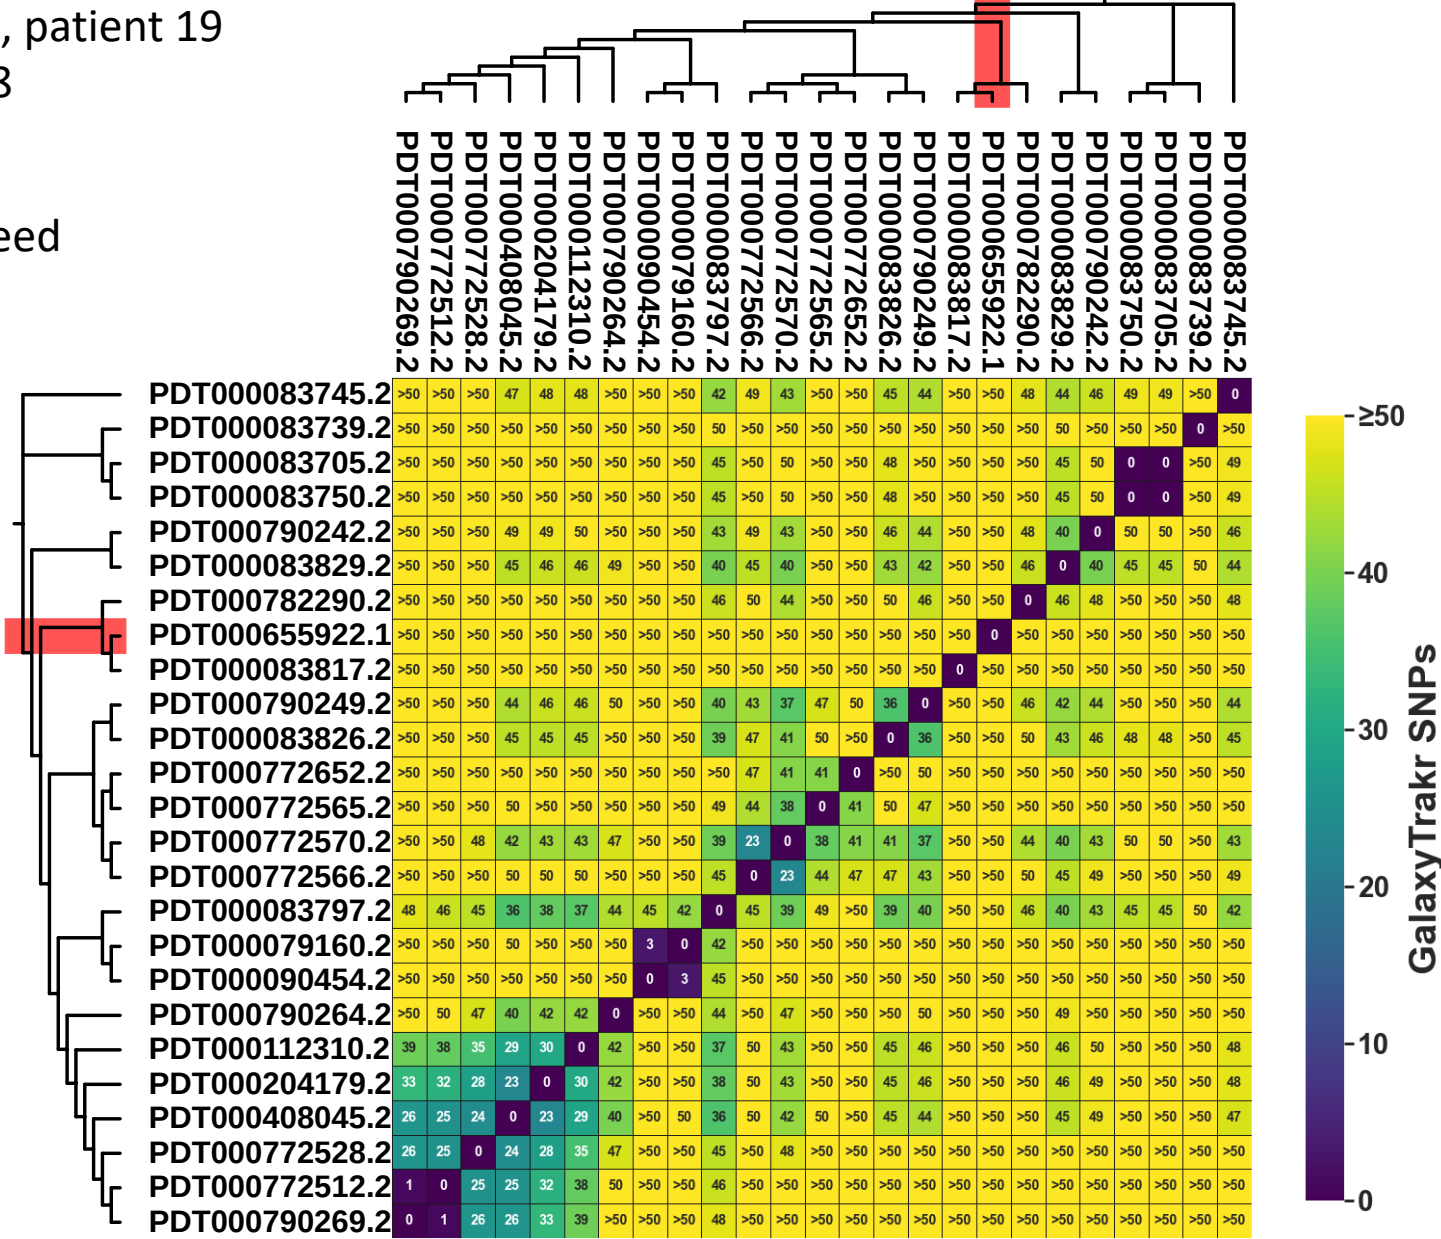

**Figure S9. Phylogenetic context of PDT000655922.1.** Isolates from our institution are highlighted in light red, with the seed shown in darker red. NCBI SNP Clusters are outlined in green. Numbers of SNPs are indicated by number and by color from dark purple (low values) to light yellow (high values).

Seed: PDT000655918.1, patient 20  
(non-clustered) day 480

■ BWH Isolate  
■ BWH Isolate and Seed

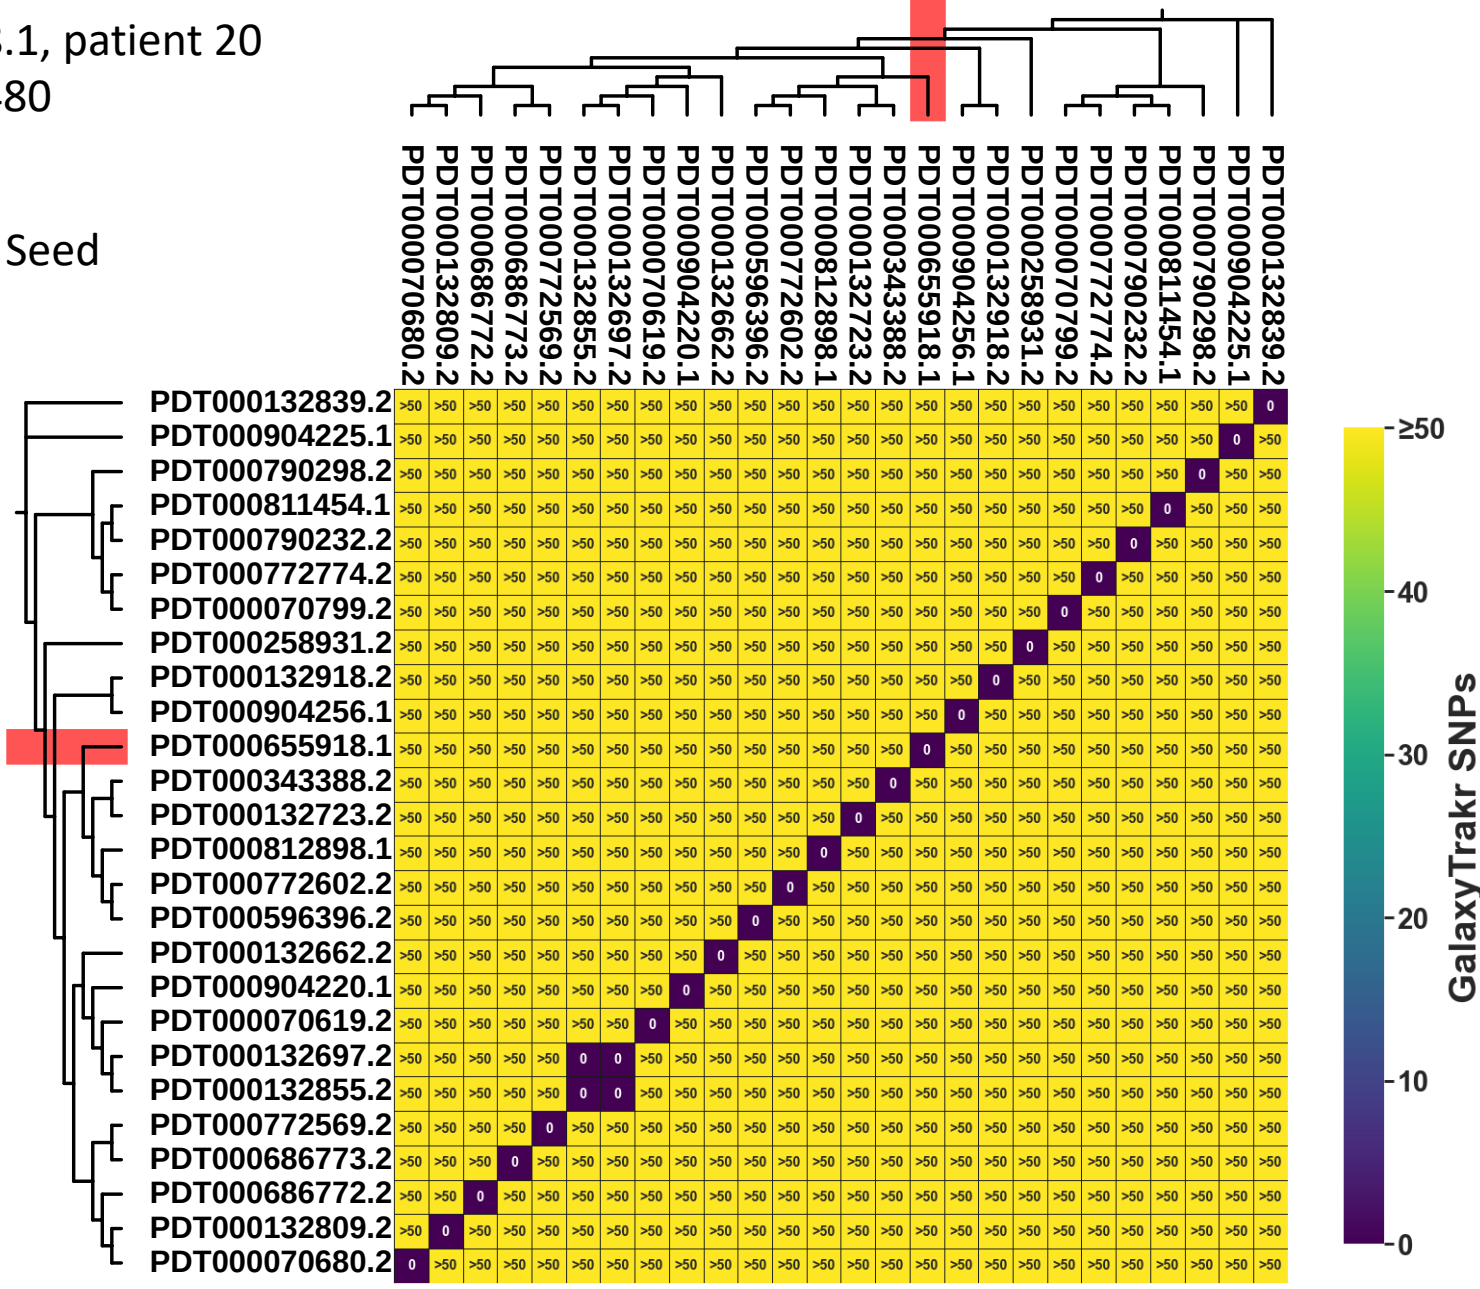

**Figure S10. Phylogenetic context of PDT000655918.1.** Isolates from our institution are highlighted in light red, with the seed shown in darker red. NCBI SNP Clusters are outlined in green. Numbers of SNPs are indicated by number and by color from dark purple (low values) to light yellow (high values).



Seed: PDT000655908.1, patient 22  
(non-clustered) day 550

BWH Isolate  
 BWH Isolate and Seed

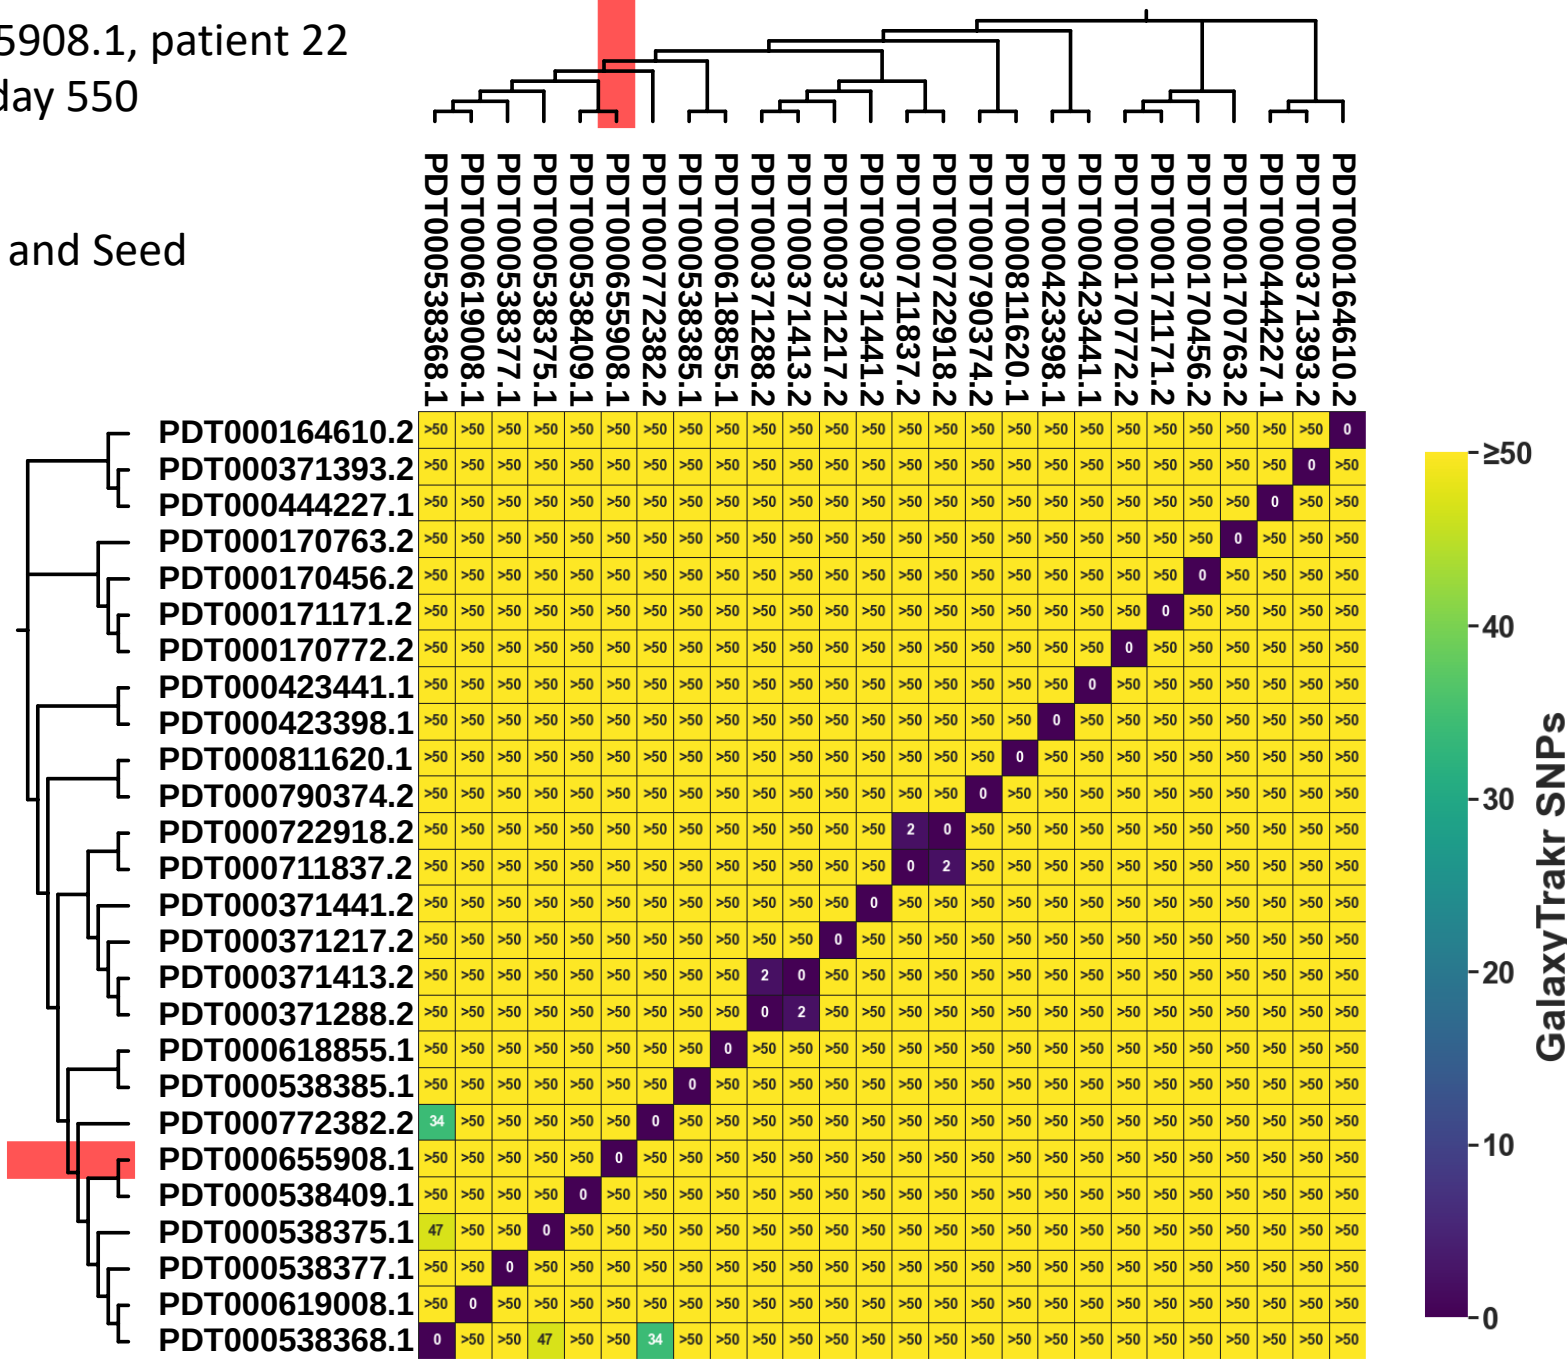

**Figure S12. Phylogenetic context of PDT000655908.1.** Isolates from our institution are highlighted in light red, with the seed shown in darker red. NCBI SNP Clusters are outlined in green. Numbers of SNPs are indicated by number and by color from dark purple (low values) to light yellow (high values).

Seed: PDT000551365.1, non-NICU  
 BWH submission (non-clustered)

■ BWH Isolate  
■ BWH Isolate and Seed

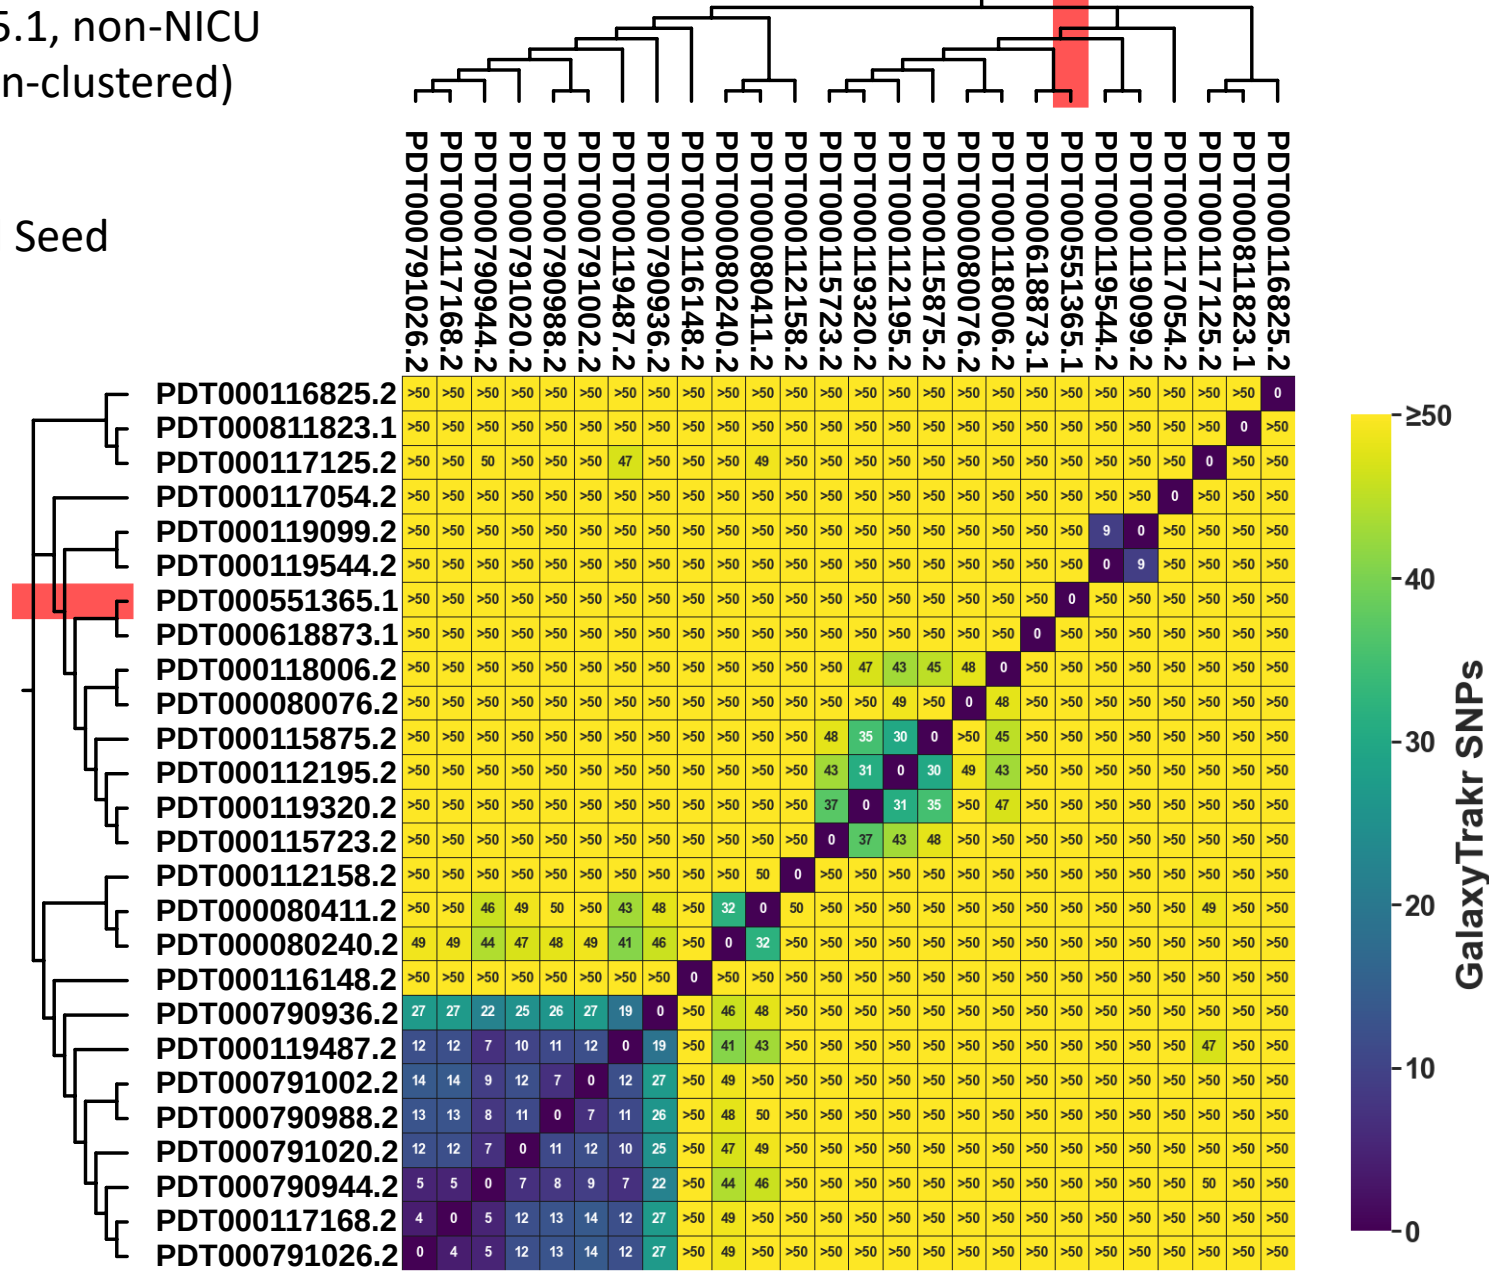

**Figure S13. Phylogenetic context of PDT000551365.1.** Isolates from our institution are highlighted in light red, with the seed shown in darker red. NCBI SNP Clusters are outlined in green. Numbers of SNPs are indicated by number and by color from dark purple (low values) to light yellow (high values).



Seed: PDT000168658.2, non-NICU  
 BWH submission (non-clustered)

 BWH Isolate  
 BWH Isolate and Seed

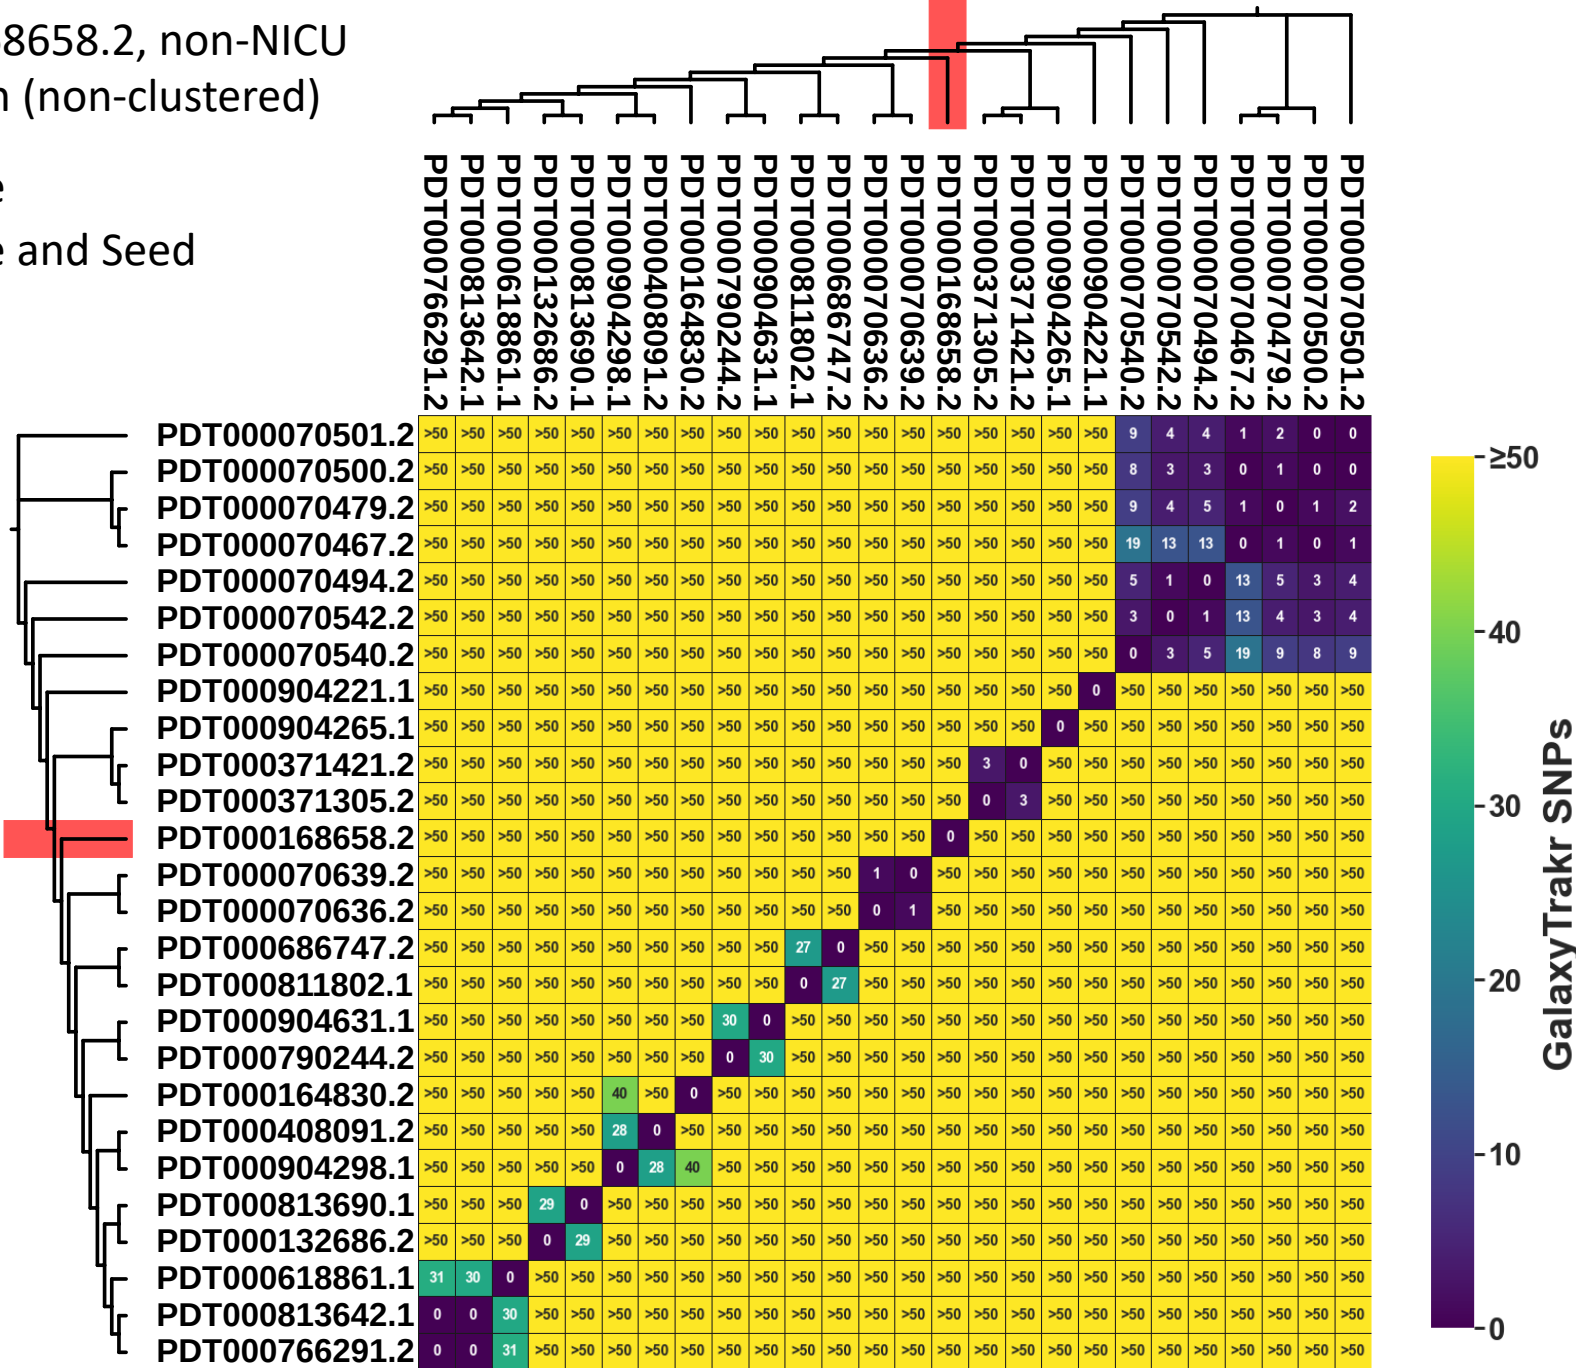

Figure S14. Phylogenetic context of PDT000168658.2.1. Isolates from our institution are highlighted in light red, with the seed shown in darker red. NCBI SNP Clusters are outlined in green. Numbers of SNPs are indicated by number and by color from dark purple (low values) to light yellow (high values).



Seed: PDT000082663.3, non-NICU  
 BWH submission (non-clustered)

BWH Isolate  
 BWH Isolate and Seed

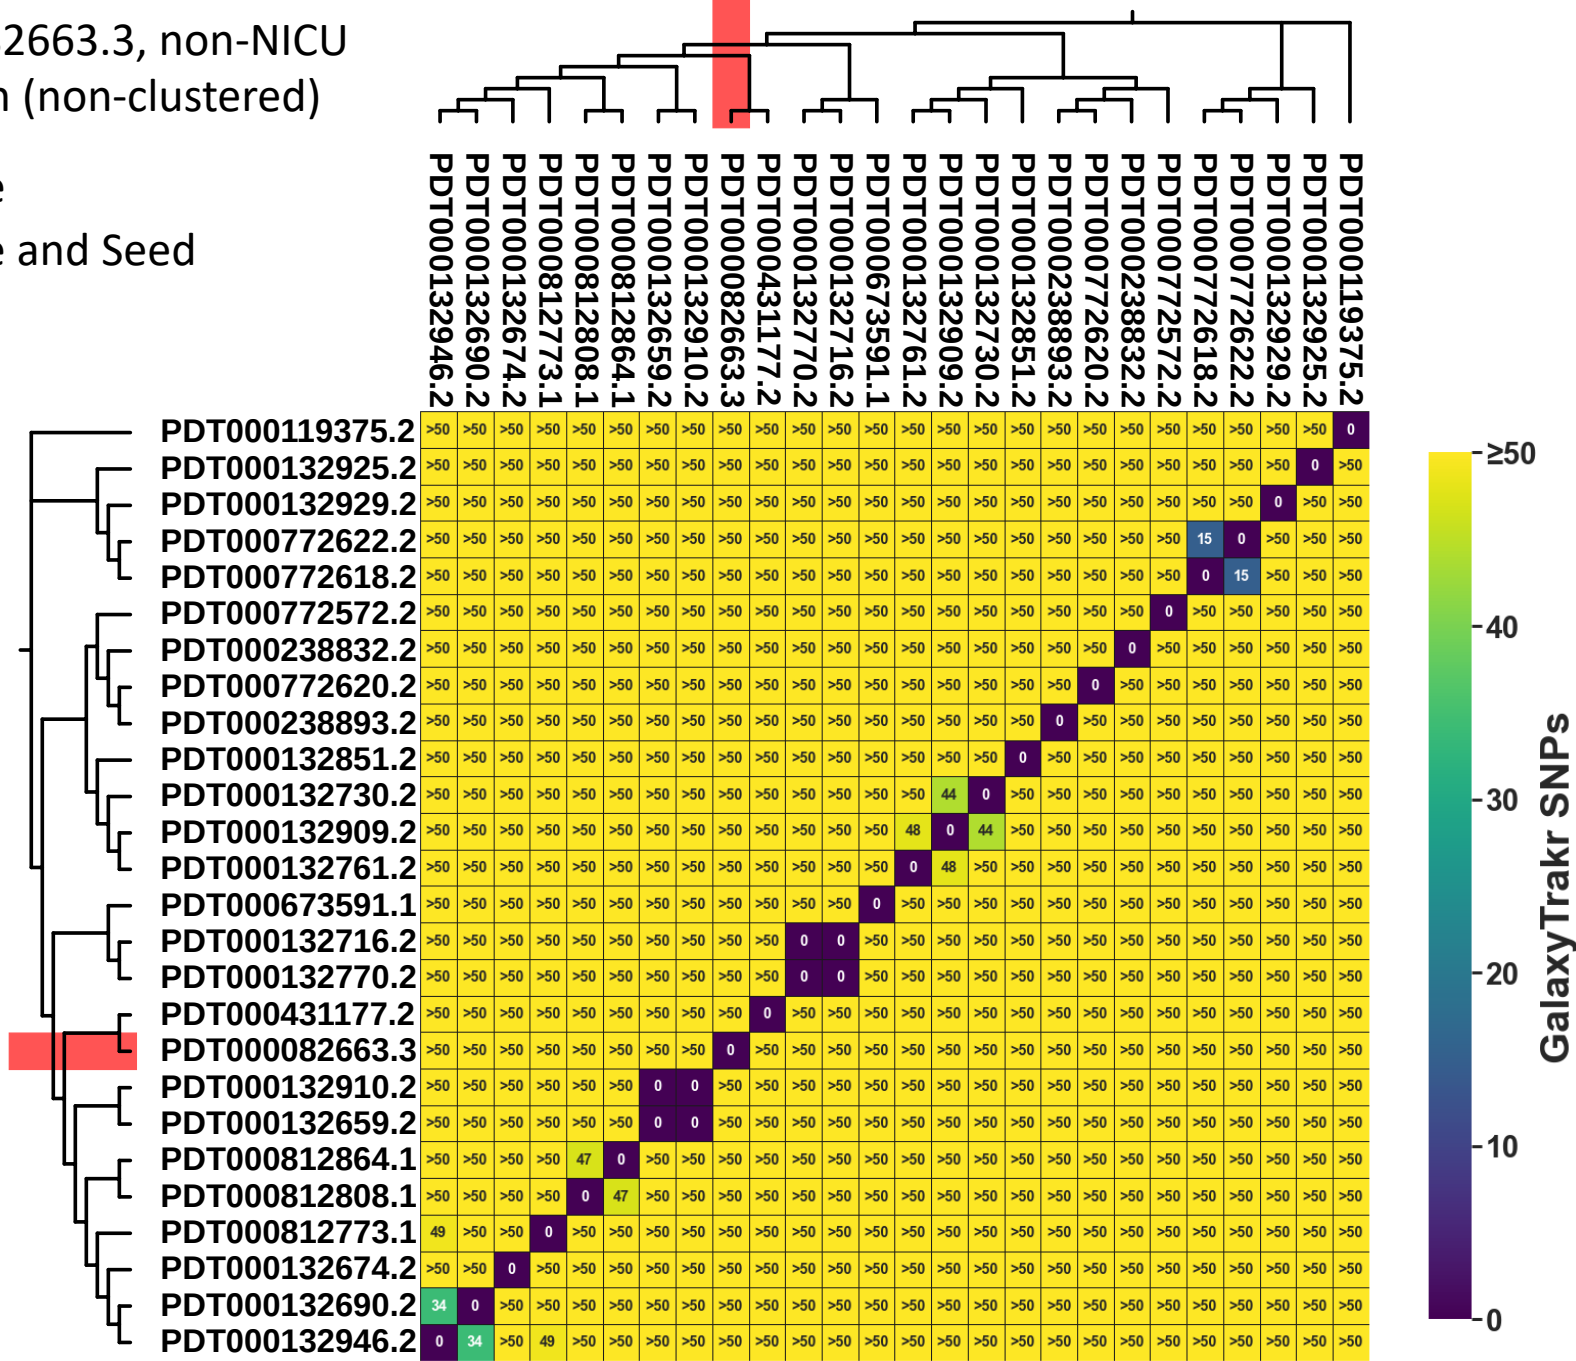

**Figure S16. Phylogenetic context of PDT000082663.3.** Isolates from our institution are highlighted in light red, with the seed shown in darker red. NCBI SNP Clusters are outlined in green. Numbers of SNPs are indicated by number and by color from dark purple (low values) to light yellow (high values).

Seed: PDT000082678.2, non-NICU  
 BWH submission (non-clustered)

■ BWH Isolate  
■ BWH Isolate and Seed

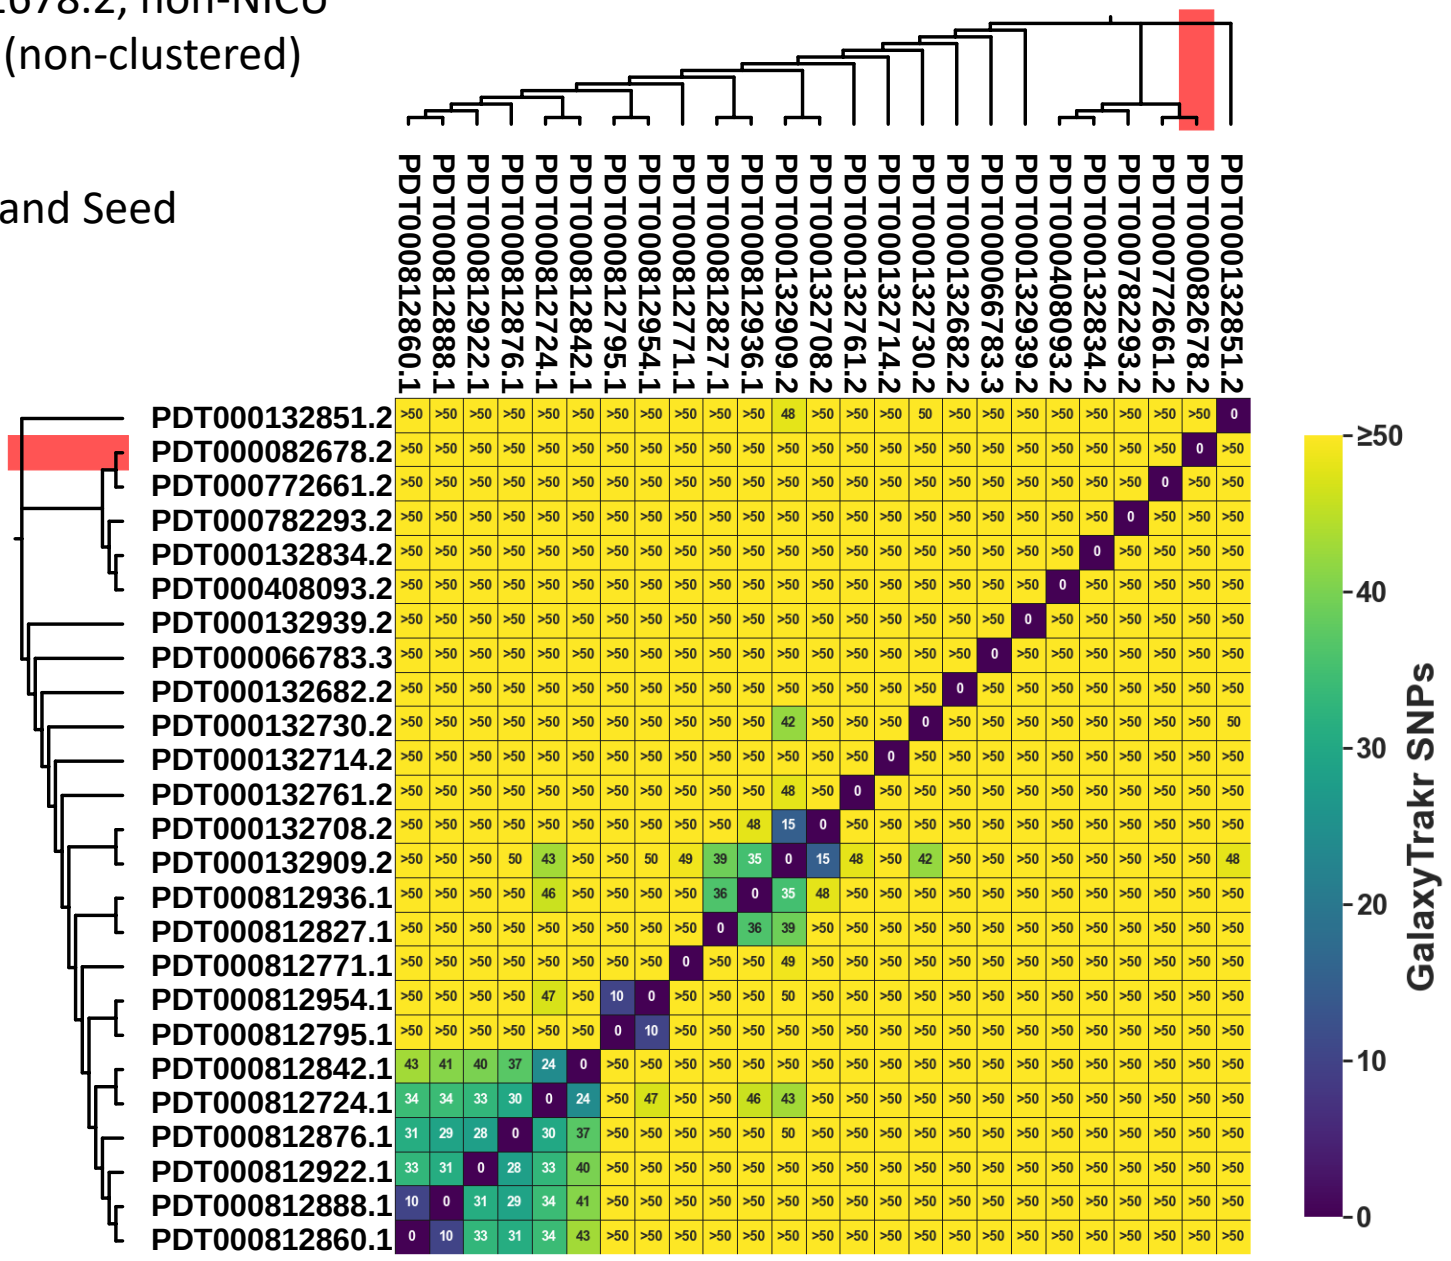

Figure S17. Phylogenetic context of PDT000082678.2. Isolates from our institution are highlighted in light red, with the seed shown in darker red. NCBI SNP Clusters are outlined in green. Numbers of SNPs are indicated by number and by color from dark purple (low values) to light yellow (high values).

Seed: PDT000082665.2, non-NICU  
 BWH submission (non-clustered)

■ BWH Isolate  
■ BWH Isolate and Seed

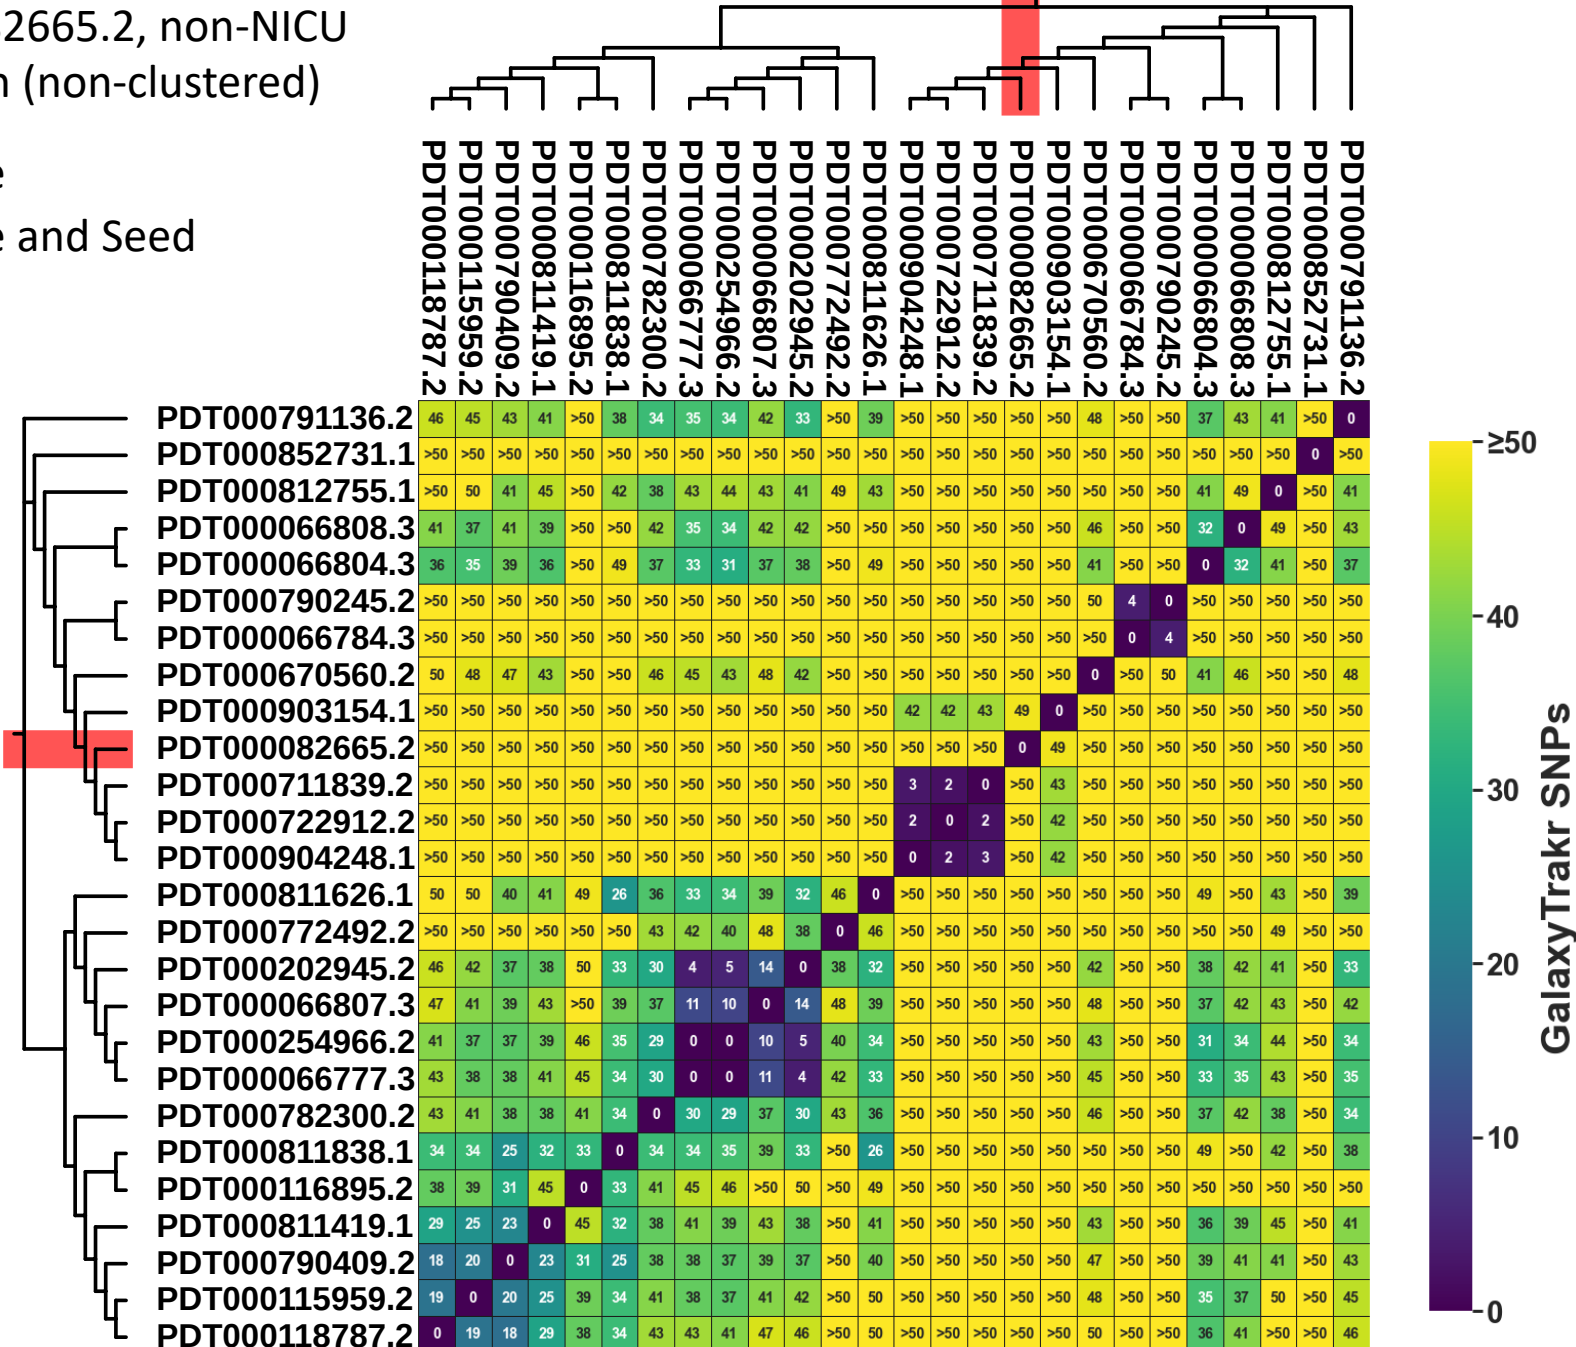

Figure S18. Phylogenetic context of PDT000082665.2. Isolates from our institution are highlighted in light red, with the seed shown in darker red. NCBI SNP Clusters are outlined in green. Numbers of SNPs are indicated by number and by color from dark purple (low values) to light yellow (high values).



Seed: PDT000107931.1, non-NICU  
 BWH submission (non-clustered)

 BWH Isolate  
 BWH Isolate and Seed

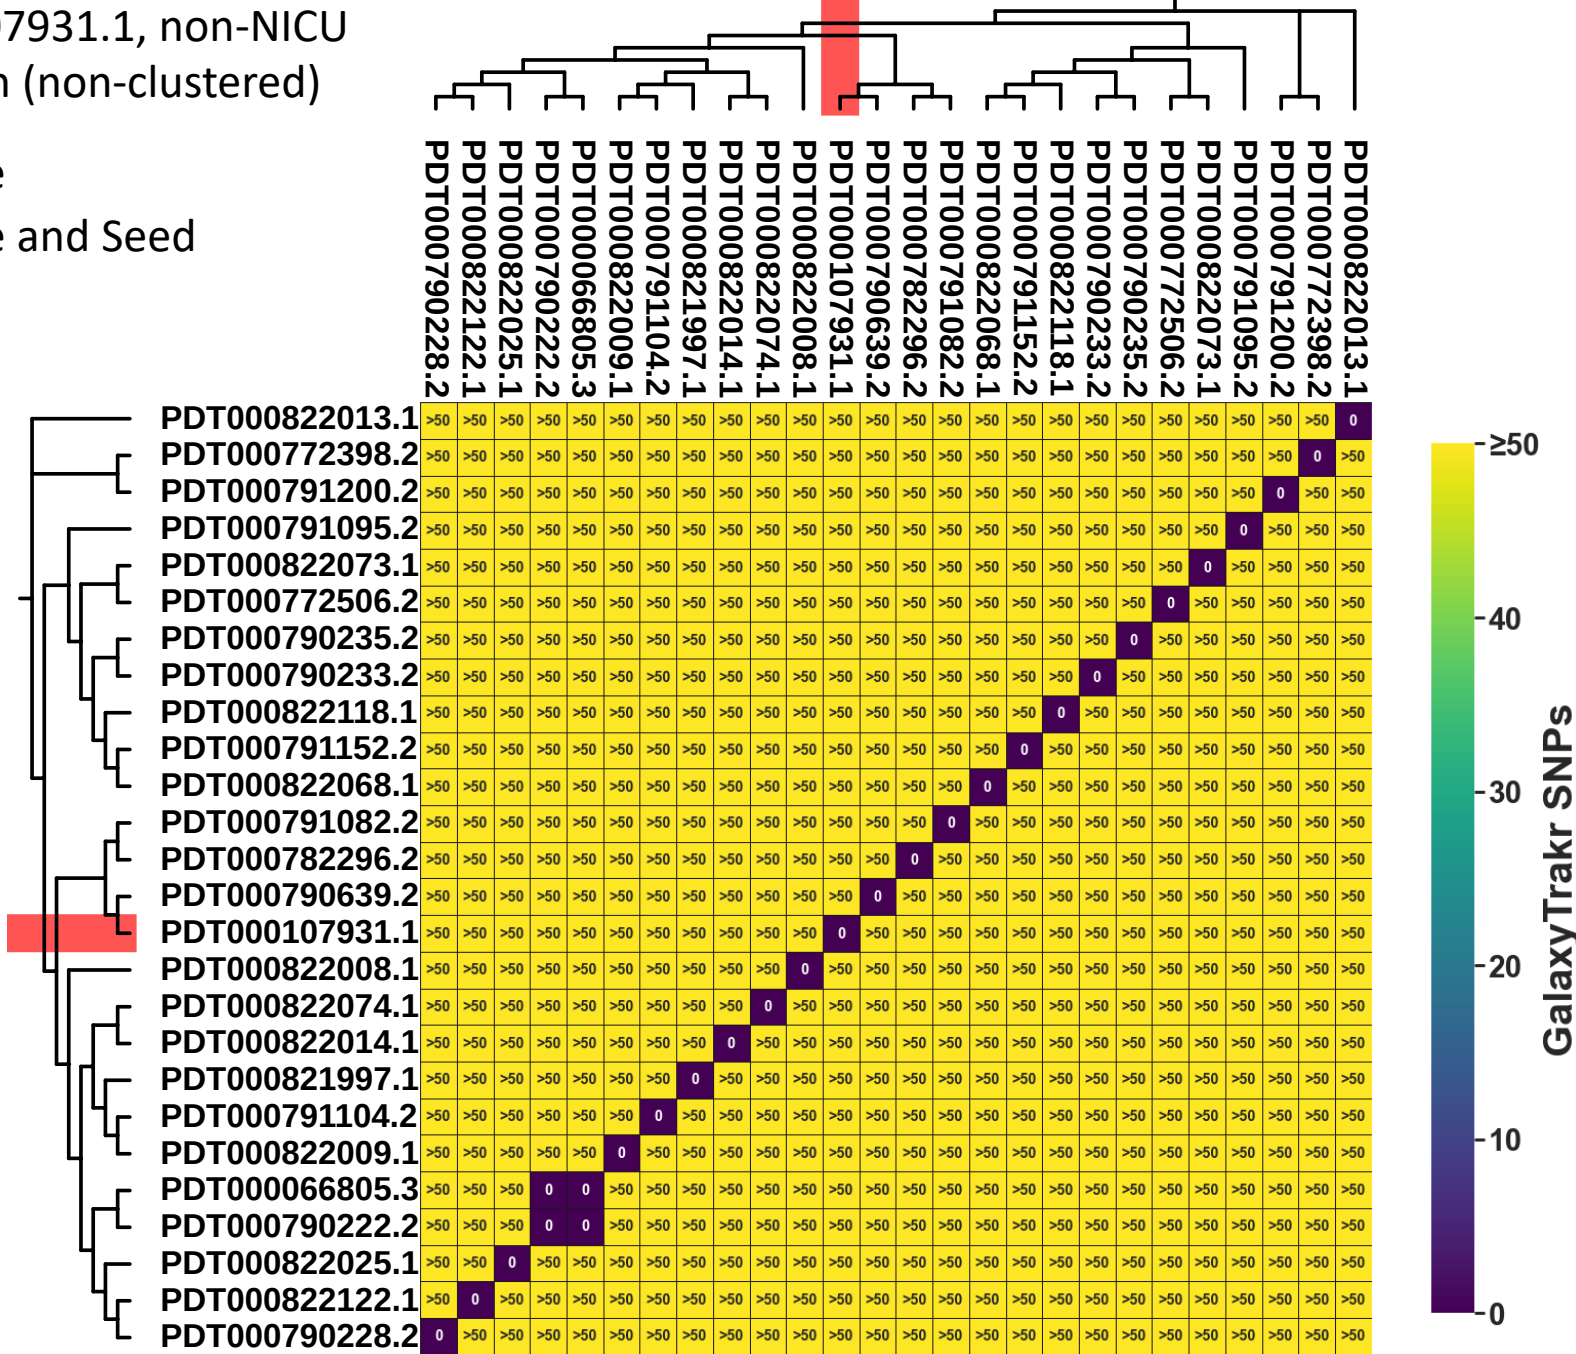

**Figure S19. Phylogenetic context of 107931.1.** Isolates from our institution are highlighted in light red, with the seed shown in darker red. NCBI SNP Clusters are outlined in green. Numbers of SNPs are indicated by number and by color from dark purple (low values) to light yellow (high values).

Seed: PDT000082677.2, non-NICU  
 BWH submission (non-clustered)

 BWH Isolate  
 BWH Isolate and Seed

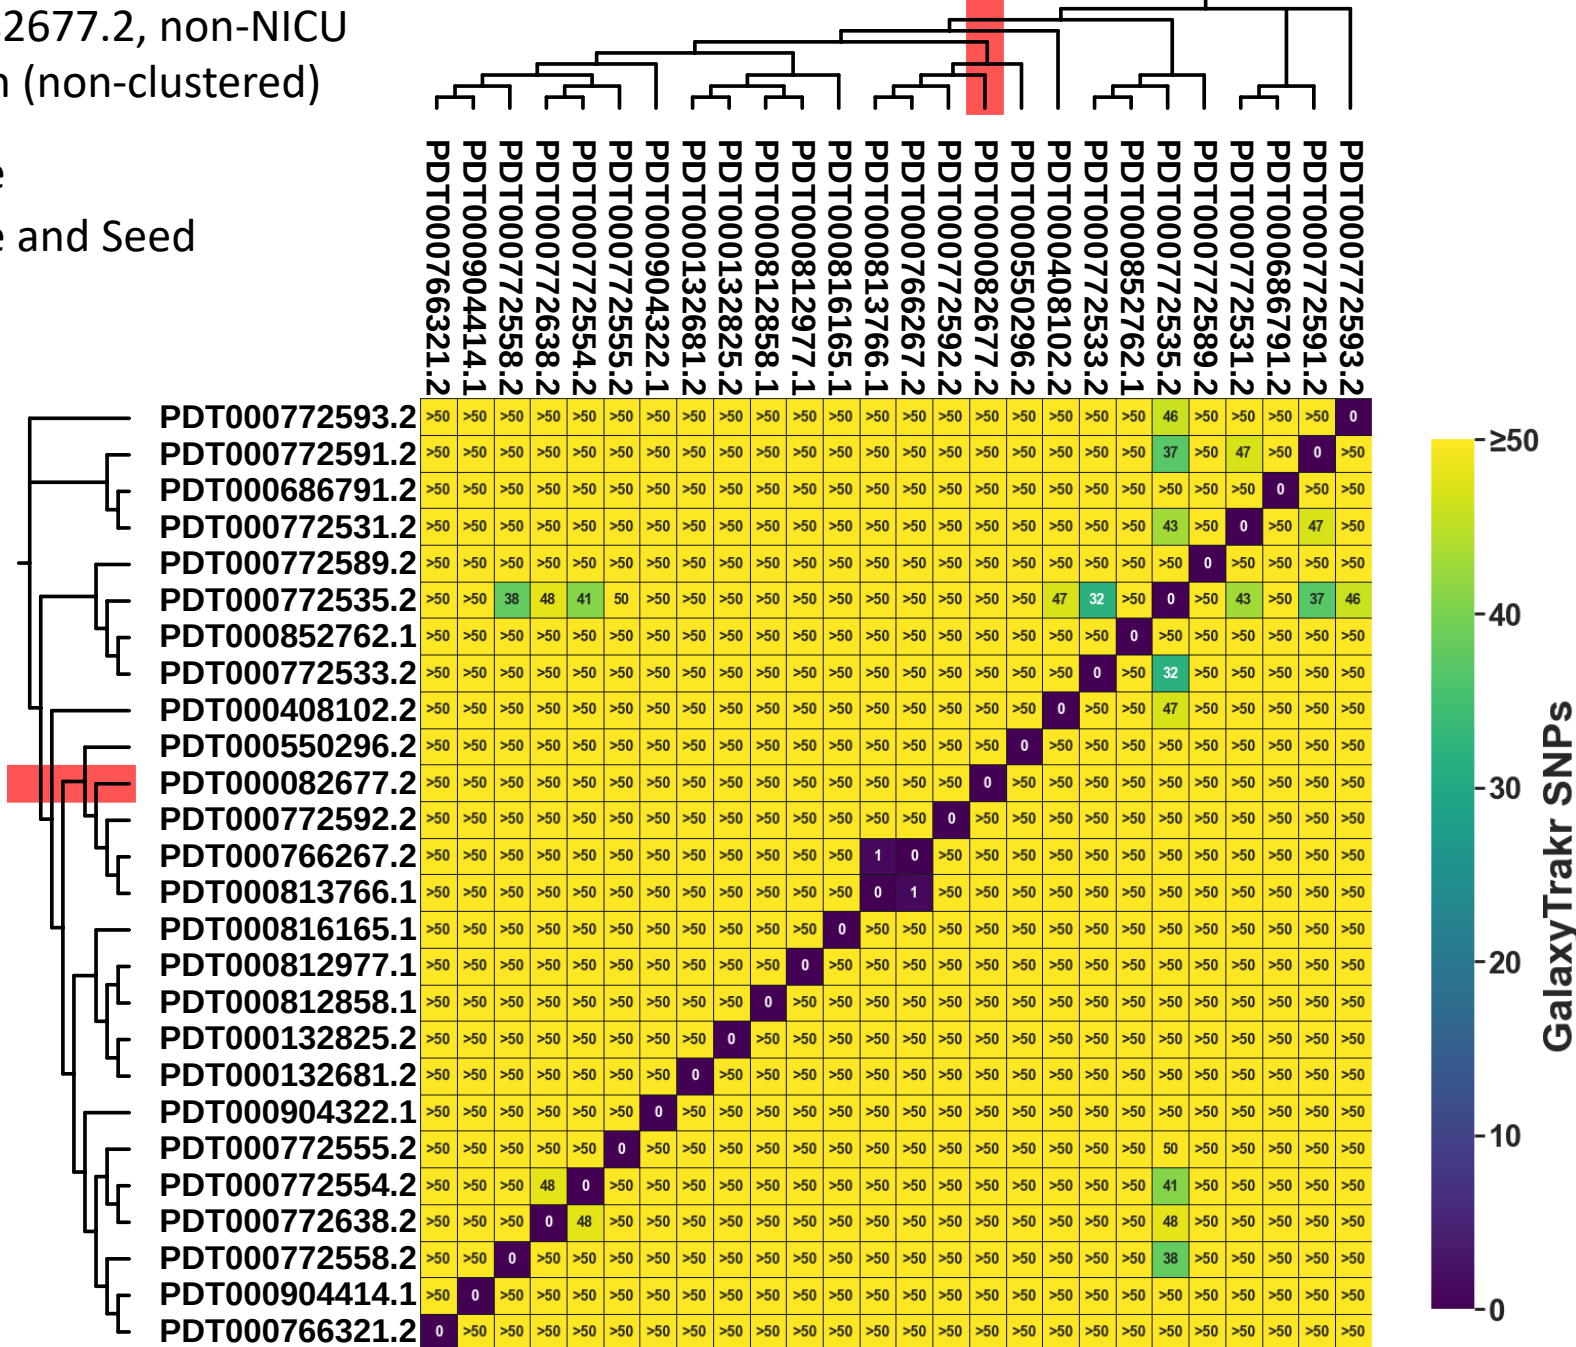

Figure S20. Phylogenetic context of PDT000082677.2. Isolates from our institution are highlighted in light red, with the seed shown in darker red. NCBI SNP Clusters are outlined in green. Numbers of SNPs are indicated by number and by color from dark purple (low values) to light yellow (high values).

| ICD10 Code | Definition                                                      | Proportion with MRSA (n = 22) | Proportion without MRSA (n = 501) | p value | q value |
|------------|-----------------------------------------------------------------|-------------------------------|-----------------------------------|---------|---------|
| P61.2      | Anemia of prematurity                                           | 0.64 (14)                     | 0.14 (68)                         | < 0.001 | < 0.001 |
| P27.1      | Bronchopulmonary dysplasia originating in the perinatal period  | 0.41 (9)                      | 0.06 (31)                         | < 0.001 | < 0.001 |
| P07.30     | Preterm newborn, unspecified weeks of gestation                 | 0.68 (15)                     | 0.22 (111)                        | < 0.001 | < 0.001 |
| R63.3      | Feeding difficulties                                            | 0.73 (16)                     | 0.25 (126)                        | < 0.001 | < 0.001 |
| P00.89     | Newborn (suspected to be) affected by other maternal conditions | 0.36 (8)                      | 0.08 (38)                         | < 0.001 | < 0.001 |
| P28.4      | Other apnea of newborn                                          | 0.82 (18)                     | 0.38 (192)                        | < 0.001 | 0.001   |
| P81.9      | Disturbance of temperature regulation of newborn, unspecified   | 0.82 (18)                     | 0.43 (214)                        | 0.001   | 0.002   |
| P07.14     | Other low birth weight newborn, 1000-1249 grams                 | 0.27 (6)                      | 0.06 (30)                         | 0.001   | 0.003   |
| P59.0      | Neonatal jaundice associated with preterm delivery              | 0.64 (14)                     | 0.29 (144)                        | 0.001   | 0.004   |
| Z38.31     | Twin liveborn infant, delivered by cesarean                     | 0.41 (9)                      | 0.14 (70)                         | 0.002   | 0.005   |
| Q25.0      | Patent ductus arteriosus                                        | 0.27 (6)                      | 0.09 (43)                         | 0.010   | 0.027   |

**Table S1.** 29 hypotheses from all ICD10 codes met the prerequisite number of 5 individuals from the group with MRSA and 20 from the group without MRSA. P values are calculated using chisq and q values are p values that are false discovery rate adjusted. Significant results (q value  $\leq$  0.05) are shown. Values are shown in ascending q value score.

| Code   | Description                                                                 | Number of patients | Average Length of stay, days (std) |
|--------|-----------------------------------------------------------------------------|--------------------|------------------------------------|
| P07.00 | Extremely low birth weight newborn, unspecified weight                      | 3                  | 106.0(7.8)                         |
| P07.01 | Extremely low birth weight newborn, less than 500 grams                     | 4                  | 67.5(64.7)                         |
| P07.02 | Extremely low birth weight newborn, 500-749 grams                           | 11                 | 85.6(51.3)                         |
| P07.03 | Extremely low birth weight newborn, 750-999 grams                           | 13                 | 82.0(30.7)                         |
| P07.10 | Other low birth weight newborn, unspecified weight                          | 45                 | 35.9(25.3)                         |
| P07.14 | Other low birth weight newborn, 1000-1249 grams                             | 36                 | 55.9(28.4)                         |
| P07.15 | Other low birth weight newborn, 1250-1499 grams                             | 54                 | 53.3(25.2)                         |
| P07.16 | Other low birth weight newborn, 1500-1749 grams                             | 23                 | 36.9(21.3)                         |
| P07.17 | Other low birth weight newborn, 1750-1999 grams                             | 44                 | 28.4(15.8)                         |
| P07.18 | Other low birth weight newborn, 2000-2499 grams                             | 102                | 19.1(16.1)                         |
| P07.21 | Extreme immaturity of newborn, gestational age less than 23 completed weeks | 2                  | 75.5(68.5)                         |
| P07.22 | Extreme immaturity of newborn, gestational age 23 completed weeks           | 5                  | 53.8(63.2)                         |
| P07.23 | Extreme immaturity of newborn, gestational age 24 completed weeks           | 3                  | 69.0(42.5)                         |
| P07.24 | Extreme immaturity of newborn, gestational age 25 completed weeks           | 4                  | 130.8(10.6)                        |
| P07.25 | Extreme immaturity of newborn, gestational age 26 completed weeks           | 2                  | 108.0(8.0)                         |
| P07.26 | Extreme immaturity of newborn, gestational age 27 completed weeks           | 8                  | 77.6(34.4)                         |
| P07.30 | Preterm newborn, unspecified weeks of gestation                             | 126                | 46.9(33.9)                         |
| P07.31 | Preterm newborn, gestational age 28 completed weeks                         | 21                 | 59.0(33.7)                         |
| P07.32 | Preterm newborn, gestational age 29 completed weeks                         | 23                 | 66.6(22.1)                         |
| P07.33 | Preterm newborn, gestational age 30 completed weeks                         | 18                 | 58.6(22.3)                         |
| P07.34 | Preterm newborn, gestational age 31 completed weeks                         | 18                 | 34.4(17.7)                         |
| P07.35 | Preterm newborn, gestational age 32 completed weeks                         | 34                 | 43.2(22.3)                         |
| P07.36 | Preterm newborn, gestational age 33 completed weeks                         | 37                 | 26.1(16.2)                         |
| P07.37 | Preterm newborn, gestational age 34 completed weeks                         | 68                 | 22.9(13.6)                         |
| P07.38 | Preterm newborn, gestational age 35 completed weeks                         | 72                 | 13.6(14.7)                         |
| P07.39 | Preterm newborn, gestational age 36 completed weeks                         | 51                 | 13.3(11.3)                         |

**Table S2.** Association of prematurity ICD10 codes with length of stay, defined as admission to discharge. “std” means “standard deviation”. Premature patients had an average admission of 29.7 days (std, 29.3), and full term infants (>36 completed weeks) had an average admission of 6.78 days (std, 7.15).

| Supplementary Table 3 |              |         |             |              |                |               |                 |                |
|-----------------------|--------------|---------|-------------|--------------|----------------|---------------|-----------------|----------------|
| CRIMSON ID            | Day of study | Patient | BioProject  | BioSample    | Isolate        | SRA Accession | Assembly        | SNP cluster    |
| 0000-0075-9640        | 46           | 1       | PRJNA278886 | SAMN12610242 | PDT000568584.1 | SRR10004852   | GCA_015602585.1 | PDS000067849.1 |
| 0000-0075-9623        | 46           | 2       | PRJNA278886 | SAMN12610313 | PDT000568586.1 | SRR10005100   | GCA_015602555.1 | PDS000067849.1 |
| 0000-0079-6461        | 396          | 3       | PRJNA278886 | SAMN13687282 | PDT000655931.1 | SRR10842802   | GCA_015593925.1 | PDS000067849.1 |
| 0000-0079-6715        | 403          | 4       | PRJNA278886 | SAMN13687285 | PDT000655927.1 | SRR10842798   | GCA_015593605.1 | PDS000067849.1 |
| 0000-0079-6458        | 396          | 4       | PRJNA278886 | SAMN13687281 | PDT000655932.1 | SRR10842803   | GCA_015593905.1 | PDS000067849.1 |
| 0000-0079-5849        | 389          | 4       | PRJNA278886 | SAMN13687279 | PDT000655933.1 | SRR10842805   | GCA_015594045.1 | PDS000067849.1 |
| 0000-0079-4781        | 375          | 4       | PRJNA278886 | SAMN13687270 | PDT000655906.1 | SRR10842776   | GCA_015594145.1 | PDS000067849.1 |
| 0000-0079-5347        | 382          | 4       | PRJNA278886 | SAMN13687274 | PDT000655902.1 | SRR10842772   | GCA_015594305.1 | PDS000067849.1 |
| 0000-0079-6464        | 396          | 5       | PRJNA278886 | SAMN13687283 | PDT000655930.1 | SRR10842801   | GCA_015593885.1 | PDS000067849.1 |
| 0000-0080-8088        | 550          | 6       | PRJNA278886 | SAMN13687303 | PDT000655909.1 | SRR10842779   | GCA_015594105.1 | PDS000069849.1 |
| 0000-0079-5622        | 382          | 7       | PRJNA278886 | SAMN13687277 | PDT000655935.1 | SRR10842807   | GCA_015593855.1 | PDS000069850.1 |
| 0000-0079-4800        | 375          | 7       | PRJNA278886 | SAMN13687271 | PDT000655905.1 | SRR10842775   | GCA_015594205.1 | PDS000069850.1 |
| 0000-0079-4197        | 361          | 7       | PRJNA278886 | SAMN12414142 | PDT000551320.1 | SRR9860608    | GCA_015602785.1 | PDS000069850.1 |
| 0000-0079-4433        | 368          | 7       | PRJNA278886 | SAMN12414146 | PDT000551278.1 | SRR9860559    | GCA_015602985.1 | PDS000069850.1 |
| 0000-0080-0509        | 452          | 8       | PRJNA278886 | SAMN13687292 | PDT000655920.1 | SRR10842791   | GCA_015593685.1 | PDS000069850.1 |
| 0000-0080-0499        | 445          | 8       | PRJNA278886 | SAMN13687291 | PDT000655921.1 | SRR10842792   | GCA_015593725.1 | PDS000069850.1 |
| 0000-0080-0935        | 459          | 8       | PRJNA278886 | SAMN13687293 | PDT000655919.1 | SRR10842790   | GCA_015593765.1 | PDS000069850.1 |
| 0000-0080-5114        | 508          | 9       | PRJNA278886 | SAMN13687295 | PDT000655916.1 | SRR10842787   | GCA_015593585.1 | PDS000069850.1 |
| 0000-0080-5498        | 515          | 9       | PRJNA278886 | SAMN13687297 | PDT000655915.1 | SRR10842785   | GCA_015593625.1 | PDS000069850.1 |
| 0000-0080-6711        | 529          | 9       | PRJNA278886 | SAMN13687300 | PDT000655912.1 | SRR10842782   | GCA_015594185.1 | PDS000069850.1 |
| 0000-0080-5942        | 522          | 9       | PRJNA278886 | SAMN13687299 | PDT000655913.1 | SRR10842783   | GCA_015594215.1 | PDS000069850.1 |
| 0000-0080-7261        | 536          | 9       | PRJNA278886 | SAMN13687302 | PDT000655910.1 | SRR10842780   | GCA_015594245.1 | PDS000069850.1 |
| 0000-0080-5936        | 522          | 10      | PRJNA278886 | SAMN13687298 | PDT000655914.1 | SRR10842784   | GCA_015593665.1 | PDS000069850.1 |
| 0000-0080-6726        | 529          | 10      | PRJNA278886 | SAMN13687301 | PDT000655911.1 | SRR10842781   | GCA_015594165.1 | PDS000069850.1 |
| 0000-0079-5619        | 382          | 11      | PRJNA278886 | SAMN13687276 | PDT000655936.1 | SRR10842808   | GCA_015593955.1 | PDS000069851.1 |
| 0000-0079-4608        | 369          | 12      | PRJNA278886 | SAMN13687266 | PDT000655938.1 | SRR10842810   | GCA_015593815.1 | PDS000069851.1 |
| 0000-0079-5338        | 382          | 12      | PRJNA278886 | SAMN13687272 | PDT000655904.1 | SRR10842774   | GCA_015594345.1 | PDS000069851.1 |
| 0000-0079-3150        | 347          | 12      | PRJNA278886 | SAMN12610227 | PDT000568578.1 | SRR10004513   | GCA_015602545.1 | PDS000069851.1 |
| 0000-0079-3316        | 354          | 12      | PRJNA278886 | SAMN12414199 | PDT000551352.1 | SRR9860641    | GCA_015602865.1 | PDS000069851.1 |
| 0000-0079-4772        | 375          | 13      | PRJNA278886 | SAMN13687268 | PDT000655917.1 | SRR10842788   | GCA_015593705.1 | PDS000069851.1 |
| 0000-0079-5341        | 382          | 13      | PRJNA278886 | SAMN13687273 | PDT000655903.1 | SRR10842773   | GCA_015594325.1 | PDS000069851.1 |
| 0000-0079-5858        | 389          | 13      | PRJNA278886 | SAMN13687280 | PDT000655875.1 | SRR10842804   | GCA_015594365.1 | PDS000069851.1 |
| 0000-0079-4349        | 346          | 13      | PRJNA278886 | SAMN12414144 | PDT000551340.1 | SRR9860628    | GCA_015602825.1 | PDS000069851.1 |
| 0000-0079-3051        | 347          | 13      | PRJNA278886 | SAMN12414153 | PDT000551280.1 | SRR9860567    | GCA_015602885.1 | PDS000069851.1 |
| 0000-0079-4369        | 361          | 13      | PRJNA278886 | SAMN12414143 | PDT000551279.1 | SRR9860566    | GCA_015603045.1 | PDS000069851.1 |
| 0000-0079-5616        | 382          | 14      | PRJNA278886 | SAMN13687275 | PDT000655937.1 | SRR10842809   | GCA_015593785.1 | PDS000069851.1 |
| 0000-0079-5736        | 389          | 14      | PRJNA278886 | SAMN13687278 | PDT000655934.1 | SRR10842806   | GCA_015593985.1 | PDS000069851.1 |
| 0000-0079-7526        | 417          | 14      | PRJNA278886 | SAMN13687288 | PDT000655924.1 | SRR10842795   | GCA_015594005.1 | PDS000069851.1 |
| 0000-0079-6473        | 396          | 14      | PRJNA278886 | SAMN13687284 | PDT000655929.1 | SRR10842800   | GCA_015594025.1 | PDS000069851.1 |
| 0000-0079-6724        | 403          | 14      | PRJNA278886 | SAMN13687286 | PDT000655926.1 | SRR10842797   | GCA_015594065.1 | PDS000069851.1 |
| 0000-0079-7237        | 410          | 14      | PRJNA278886 | SAMN13687287 | PDT000655925.1 | SRR10842796   | GCA_015594085.1 | PDS000069851.1 |
| 0000-0079-8010        | 424          | 14      | PRJNA278886 | SAMN13687289 | PDT000655923.1 | SRR10842794   | GCA_015594125.1 | PDS000069851.1 |
| 0000-0079-4775        | 375          | 14      | PRJNA278886 | SAMN13687269 | PDT000655907.1 | SRR10842777   | GCA_015594285.1 | PDS000069851.1 |
| 0000-0079-4436        | 368          | 14      | PRJNA278886 | SAMN13687265 | PDT000655876.1 | SRR10842811   | GCA_015594405.1 | PDS000069851.1 |
| 0000-0079-3324        | 354          | 14      | PRJNA278886 | SAMN12414158 | PDT000551301.1 | SRR9860589    | GCA_015602925.1 | PDS000069851.1 |
| 0000-0079-4372        | 361          | 14      | PRJNA278886 | SAMN12414151 | PDT000551375.1 | SRR9860668    | GCA_015602945.1 | PDS000069851.1 |
| 0000-0079-2690        | 340          | 14      | PRJNA278886 | SAMN12414156 | PDT000551281.1 | SRR9860568    | GCA_015602965.1 | PDS000069851.1 |
| 0000-0078-7631        | 242          | 15      | PRJNA278886 | SAMN12414149 | PDT000551271.1 | SRR9860552    | GCA_015603005.1 | PDS000069882.1 |
| 0000-0078-5105        | 221          | 15      | PRJNA278886 | SAMN12190205 | PDT000537232.1 | SRR9620941    | GCA_015604335.1 | PDS000069882.1 |
| 0000-0078-5102        | 220          | 16      | PRJNA278886 | SAMN12190446 | PDT000537240.1 | SRR9620959    | GCA_015604365.1 | PDS000069882.1 |
| 0000-0078-5111        | 215          | 17      | PRJNA278886 | SAMN12189890 | PDT000537205.1 | SRR9620894    | GCA_015604385.1 | PDS000069883.1 |
| 0000-0078-5108        | 221          | 17      | PRJNA278886 | SAMN12190392 | PDT000537239.1 | SRR9620954    | GCA_015604405.1 | PDS000069883.1 |
| 0000-0079-4763        | 375          | 18      | PRJNA278886 | SAMN13687267 | PDT000655928.1 | SRR10842799   | GCA_015593845.1 | NA             |



| Supplementary Table 3, continued |              |         |             |              |                |               |                 |             |
|----------------------------------|--------------|---------|-------------|--------------|----------------|---------------|-----------------|-------------|
| CRIMSON ID                       | Day of study | Patient | BioProject  | BioSample    | Isolate        | SRA Accession | Assembly        | SNP cluster |
| 0000-0079-9646                   | 438          | 19      | PRJNA278886 | SAMN13687290 | PDT000655922.1 | SRR10842793   | GCA_015593945.1 | NA          |
| 0000-0080-2507                   | 480          | 20      | PRJNA278886 | SAMN13687294 | PDT000655918.1 | SRR10842789   | GCA_015593645.1 | NA          |
| 0000-0080-5345                   | 508          | 21      | PRJNA278886 | SAMN13687296 | PDT000655874.1 | SRR10842786   | GCA_015594385.1 | NA          |
| 0000-0080-8103                   | 550          | 22      | PRJNA278886 | SAMN13687304 | PDT000655908.1 | SRR10842778   | GCA_015594265.1 | NA          |

**Table S3. MRSA genome assemblies from NICU patient isolates.** SNP clusters marked “NA” are strains that were not clustered by the NCBI Pathogen Detection Isolates program.

Table S4

| Isolate        | BioProject   | BioSample    | SRA Accession | Assembly        | SNP Cluster    |
|----------------|--------------|--------------|---------------|-----------------|----------------|
| PDT000666348.2 | SAMEA2081680 | SAMEA2081680 | ERR353165     | GCA_902720405.1 | PDS000069819.1 |
| PDT000666349.2 | SAMEA2077838 | SAMEA2077838 | ERR353223     | GCA_902720795.1 | PDS000069819.1 |
| PDT000666350.2 | SAMEA2080329 | SAMEA2080329 | ERR517350     | GCA_902722345.1 | PDS000069819.1 |
| PDT000666351.2 | SAMEA2080330 | SAMEA2080330 | ERR517353     | GCA_902722395.1 | PDS000069819.1 |
| PDT000666352.2 | SAMEA2076771 | SAMEA2076771 | ERR517367     | GCA_902722465.1 | PDS000069819.1 |
| PDT000666353.2 | SAMEA2080334 | SAMEA2080334 | ERR517365     | GCA_902722515.1 | PDS000069819.1 |
| PDT000666354.2 | SAMEA2080433 | SAMEA2080433 | ERR496918     | GCA_902723625.1 | PDS000069819.1 |
| PDT000669987.2 | SAMEA958995  | SAMEA958995  | ERR023530     | GCA_902713785.1 | PDS000069819.1 |
| PDT000669988.2 | SAMEA958781  | SAMEA958781  | ERR023535     | GCA_902713795.1 | PDS000069819.1 |
| PDT000669990.2 | SAMEA958777  | SAMEA958777  | ERR033827     | GCA_902713905.1 | PDS000069819.1 |
| PDT000669991.2 | SAMEA958836  | SAMEA958836  | ERR033080     | GCA_902713865.1 | PDS000069819.1 |
| PDT000669992.2 | SAMEA958776  | SAMEA958776  | ERR023527     | GCA_902713845.1 | PDS000069819.1 |
| PDT000669994.2 | SAMEA958783  | SAMEA958783  | ERR023533     | GCA_902713875.1 | PDS000069819.1 |
| PDT000669995.2 | SAMEA958780  | SAMEA958780  | ERR023534     | GCA_902713835.1 | PDS000069819.1 |
| PDT000669997.2 | SAMEA958993  | SAMEA958993  | ERR023531     | GCA_902713805.1 | PDS000069819.1 |
| PDT000669998.2 | SAMEA958779  | SAMEA958779  | ERR023526     | GCA_902713815.1 | PDS000069819.1 |
| PDT000670000.2 | SAMEA959003  | SAMEA959003  | ERR023525     | GCA_902713945.1 | PDS000069819.1 |
| PDT000670001.2 | SAMEA958782  | SAMEA958782  | ERR023532     | GCA_902713925.1 | PDS000069819.1 |
| PDT000670003.2 | SAMEA958778  | SAMEA958778  | ERR023536     | GCA_902713955.1 | PDS000069819.1 |
| PDT000670004.2 | SAMEA959001  | SAMEA959001  | ERR023529     | GCA_902713895.1 | PDS000069819.1 |
| PDT000670007.2 | SAMEA958805  | SAMEA958805  | ERR023873     | GCA_902714005.1 | PDS000069819.1 |
| PDT000670009.2 | SAMEA958902  | SAMEA958902  | ERR023863     | GCA_902714065.1 | PDS000069819.1 |
| PDT000670010.2 | SAMEA958818  | SAMEA958818  | ERR023871     | GCA_902714075.1 | PDS000069819.1 |
| PDT000670011.2 | SAMEA958812  | SAMEA958812  | ERR023866     | GCA_902714125.1 | PDS000069819.1 |
| PDT000670119.2 | SAMEA958846  | SAMEA958846  | ERR036048     | GCA_902715095.1 | PDS000069819.1 |
| PDT000670284.2 | SAMEA958980  | SAMEA958980  | ERR036002     | GCA_902716645.1 | PDS000069819.1 |
| PDT000670354.2 | SAMEA2081221 | SAMEA2081221 | ERR353086     | GCA_902717465.1 | PDS000069819.1 |
| PDT000670355.2 | SAMEA2079723 | SAMEA2079723 | ERR353085     | GCA_902717505.1 | PDS000069819.1 |
| PDT000670356.2 | SAMEA1972351 | SAMEA1972351 | ERR353076     | GCA_902717455.1 | PDS000069819.1 |
| PDT000670357.2 | SAMEA2079722 | SAMEA2079722 | ERR353084     | GCA_902717595.1 | PDS000069819.1 |
| PDT000670358.2 | SAMEA2081220 | SAMEA2081220 | ERR353083     | GCA_902717525.1 | PDS000069819.1 |
| PDT000670360.2 | SAMEA2079520 | SAMEA2079520 | ERR485201     | GCA_902717535.1 | PDS000069819.1 |
| PDT000670361.2 | SAMEA2081219 | SAMEA2081219 | ERR353080     | GCA_902717545.1 | PDS000069819.1 |
| PDT000670362.2 | SAMEA2079721 | SAMEA2079721 | ERR353082     | GCA_902717515.1 | PDS000069819.1 |
| PDT000670363.2 | SAMEA2079720 | SAMEA2079720 | ERR353081     | GCA_902717585.1 | PDS000069819.1 |
| PDT000670364.2 | SAMEA2079719 | SAMEA2079719 | ERR485205     | GCA_902717485.1 | PDS000069819.1 |
| PDT000670366.2 | SAMEA2079521 | SAMEA2079521 | ERR353078     | GCA_902717575.1 | PDS000069819.1 |
| PDT000670367.2 | SAMEA2081218 | SAMEA2081218 | ERR485203     | GCA_902717495.1 | PDS000069819.1 |
| PDT000670368.2 | SAMEA2081217 | SAMEA2081217 | ERR353074     | GCA_902717565.1 | PDS000069819.1 |
| PDT000670369.2 | SAMEA2079734 | SAMEA2079734 | ERR485229     | GCA_902717695.1 | PDS000069819.1 |
| PDT000670370.2 | SAMEA2079725 | SAMEA2079725 | ERR485214     | GCA_902717665.1 | PDS000069819.1 |
| PDT000670371.2 | SAMEA2081224 | SAMEA2081224 | ERR353098     | GCA_902717675.1 | PDS000069819.1 |
| PDT000670372.2 | SAMEA2081225 | SAMEA2081225 | ERR353101     | GCA_902717625.1 | PDS000069819.1 |
| PDT000670373.2 | SAMEA1965192 | SAMEA1965192 | ERR485230     | GCA_902717615.1 | PDS000069819.1 |
| PDT000670374.2 | SAMEA2079732 | SAMEA2079732 | ERR353100     | GCA_902717765.1 | PDS000069819.1 |
| PDT000670375.2 | SAMEA1972827 | SAMEA1972827 | ERR485219     | GCA_902717725.1 | PDS000069819.1 |
| PDT000670376.2 | SAMEA1966633 | SAMEA1966633 | ERR485215     | GCA_902717775.1 | PDS000069819.1 |
| PDT000670377.2 | SAMEA2079730 | SAMEA2079730 | ERR485223     | GCA_902717685.1 | PDS000069819.1 |
| PDT000670378.2 | SAMEA2079726 | SAMEA2079726 | ERR353090     | GCA_902717605.1 | PDS000069819.1 |
| PDT000670379.2 | SAMEA2079733 | SAMEA2079733 | ERR353102     | GCA_902717705.1 | PDS000069819.1 |
| PDT000670380.2 | SAMEA2081222 | SAMEA2081222 | ERR485218     | GCA_902717745.1 | PDS000069819.1 |
| PDT000670381.2 | SAMEA2081223 | SAMEA2081223 | ERR485221     | GCA_902717655.1 | PDS000069819.1 |
| PDT000670382.2 | SAMEA2079729 | SAMEA2079729 | ERR353096     | GCA_902717715.1 | PDS000069819.1 |
| PDT000670383.2 | SAMEA2079724 | SAMEA2079724 | ERR353087     | GCA_902717755.1 | PDS000069819.1 |
| PDT000670384.2 | SAMEA2079728 | SAMEA2079728 | ERR485220     | GCA_902717635.1 | PDS000069819.1 |
| PDT000670385.2 | SAMEA2079727 | SAMEA2079727 | ERR485217     | GCA_902717735.1 | PDS000069819.1 |
| PDT000670386.2 | SAMEA2079731 | SAMEA2079731 | ERR353099     | GCA_902717645.1 | PDS000069819.1 |
| PDT000670387.2 | SAMEA2079735 | SAMEA2079735 | ERR353105     | GCA_902717795.1 | PDS000069819.1 |
| PDT000670388.2 | SAMEA2079736 | SAMEA2079736 | ERR485232     | GCA_902717785.1 | PDS000069819.1 |
| PDT000670389.2 | SAMEA2079737 | SAMEA2079737 | ERR353108     | GCA_902717805.1 | PDS000069819.1 |
| PDT000670390.2 | SAMEA2081341 | SAMEA2081341 | ERR353107     | GCA_902717815.1 | PDS000069819.1 |
| PDT000670391.2 | SAMEA2079738 | SAMEA2079738 | ERR485235     | GCA_902717825.1 | PDS000069819.1 |
| PDT000670392.2 | SAMEA2081345 | SAMEA2081345 | ERR353119     | GCA_902717885.1 | PDS000069819.1 |
| PDT000670393.2 | SAMEA2079953 | SAMEA2079953 | ERR485253     | GCA_902717875.1 | PDS000069819.1 |
| PDT000670394.2 | SAMEA2081347 | SAMEA2081347 | ERR353128     | GCA_902717855.1 | PDS000069819.1 |
| PDT000670395.2 | SAMEA2079741 | SAMEA2079741 | ERR485240     | GCA_902717845.1 | PDS000069819.1 |

|                |              |              |           |                 |                |
|----------------|--------------|--------------|-----------|-----------------|----------------|
| PDT000670396.2 | SAMEA2079742 | SAMEA2079742 | ERR485241 | GCA 902717835.1 | PDS000069819.1 |
| PDT000670397.2 | SAMEA2079948 | SAMEA2079948 | ERR485246 | GCA 902717895.1 | PDS000069819.1 |
| PDT000670398.2 | SAMEA2081346 | SAMEA2081346 | ERR485251 | GCA 902717865.1 | PDS000069819.1 |
| PDT000670399.2 | SAMEA2079946 | SAMEA2079946 | ERR353117 | GCA 902717965.1 | PDS000069819.1 |
| PDT000670400.2 | SAMEA1970276 | SAMEA1970276 | ERR485248 | GCA 902717945.1 | PDS000069819.1 |
| PDT000670401.2 | SAMEA2079739 | SAMEA2079739 | ERR353111 | GCA 902718005.1 | PDS000069819.1 |
| PDT000670402.2 | SAMEA2079951 | SAMEA2079951 | ERR353124 | GCA 902718025.1 | PDS000069819.1 |
| PDT000670403.2 | SAMEA2079947 | SAMEA2079947 | ERR485244 | GCA 902717935.1 | PDS000069819.1 |
| PDT000670404.2 | SAMEA2079740 | SAMEA2079740 | ERR485238 | GCA 902717975.1 | PDS000069819.1 |
| PDT000670405.2 | SAMEA2079952 | SAMEA2079952 | ERR353126 | GCA 902718015.1 | PDS000069819.1 |
| PDT000670406.2 | SAMEA2081342 | SAMEA2081342 | ERR485236 | GCA 902717915.1 | PDS000069819.1 |
| PDT000670407.2 | SAMEA2079949 | SAMEA2079949 | ERR353121 | GCA 902717925.1 | PDS000069819.1 |
| PDT000670408.2 | SAMEA2081343 | SAMEA2081343 | ERR353113 | GCA 902717985.1 | PDS000069819.1 |
| PDT000670409.2 | SAMEA2079954 | SAMEA2079954 | ERR485255 | GCA 902717905.1 | PDS000069819.1 |
| PDT000670410.2 | SAMEA2081344 | SAMEA2081344 | ERR485242 | GCA 902717995.1 | PDS000069819.1 |
| PDT000670411.2 | SAMEA2079950 | SAMEA2079950 | ERR353123 | GCA 902717955.1 | PDS000069819.1 |
| PDT000670412.2 | SAMEA2079957 | SAMEA2079957 | ERR353133 | GCA 902718045.1 | PDS000069819.1 |
| PDT000670413.2 | SAMEA2081349 | SAMEA2081349 | ERR485260 | GCA 902718135.1 | PDS000069819.1 |
| PDT000670414.2 | SAMEA2081351 | SAMEA2081351 | ERR485266 | GCA 902718035.1 | PDS000069819.1 |
| PDT000670415.2 | SAMEA2079956 | SAMEA2079956 | ERR485258 | GCA 902718105.1 | PDS000069819.1 |
| PDT000670416.2 | SAMEA2081348 | SAMEA2081348 | ERR485257 | GCA 902718075.1 | PDS000069819.1 |
| PDT000670417.2 | SAMEA2079962 | SAMEA2079962 | ERR485268 | GCA 902718145.1 | PDS000069819.1 |
| PDT000670418.2 | SAMEA1965481 | SAMEA1965481 | ERR353135 | GCA 902718065.1 | PDS000069819.1 |
| PDT000670419.2 | SAMEA2079955 | SAMEA2079955 | ERR485256 | GCA 902718085.1 | PDS000069819.1 |
| PDT000670420.2 | SAMEA2079959 | SAMEA2079959 | ERR485264 | GCA 902718125.1 | PDS000069819.1 |
| PDT000670421.2 | SAMEA2081350 | SAMEA2081350 | ERR485263 | GCA 902718095.1 | PDS000069819.1 |
| PDT000670422.2 | SAMEA2079960 | SAMEA2079960 | ERR353139 | GCA 902718055.1 | PDS000069819.1 |
| PDT000670423.2 | SAMEA2079958 | SAMEA2079958 | ERR485262 | GCA 902718115.1 | PDS000069819.1 |
| PDT000670424.2 | SAMEA2079961 | SAMEA2079961 | ERR353141 | GCA 902718155.1 | PDS000069819.1 |
| PDT000670425.2 | SAMEA2079964 | SAMEA2079964 | ERR357951 | GCA 902718195.1 | PDS000069819.1 |
| PDT000670426.2 | SAMEA2079965 | SAMEA2079965 | ERR485273 | GCA 902718175.1 | PDS000069819.1 |
| PDT000670427.2 | SAMEA2081352 | SAMEA2081352 | ERR485269 | GCA 902718165.1 | PDS000069819.1 |
| PDT000670428.2 | SAMEA2079966 | SAMEA2079966 | ERR357954 | GCA 902718185.1 | PDS000069819.1 |
| PDT000670429.2 | SAMEA2079967 | SAMEA2079967 | ERR357956 | GCA 902718215.1 | PDS000069819.1 |
| PDT000670430.2 | SAMEA2081354 | SAMEA2081354 | ERR357955 | GCA 902718235.1 | PDS000069819.1 |
| PDT000670431.2 | SAMEA2079963 | SAMEA2079963 | ERR357950 | GCA 902718205.1 | PDS000069819.1 |
| PDT000670432.2 | SAMEA2081353 | SAMEA2081353 | ERR404094 | GCA 902718225.1 | PDS000069819.1 |
| PDT000670433.2 | SAMEA2076209 | SAMEA2076209 | ERR357963 | GCA 902718245.1 | PDS000069819.1 |
| PDT000670434.2 | SAMEA2076216 | SAMEA2076216 | ERR357974 | GCA 902718255.1 | PDS000069819.1 |
| PDT000670435.2 | SAMEA2079969 | SAMEA2079969 | ERR357959 | GCA 902718265.1 | PDS000069819.1 |
| PDT000670436.2 | SAMEA2076211 | SAMEA2076211 | ERR485286 | GCA 902718275.1 | PDS000069819.1 |
| PDT000670437.2 | SAMEA2081357 | SAMEA2081357 | ERR357964 | GCA 902718285.1 | PDS000069819.1 |
| PDT000670438.2 | SAMEA2076213 | SAMEA2076213 | ERR485289 | GCA 902718315.1 | PDS000069819.1 |
| PDT000670439.2 | SAMEA2081355 | SAMEA2081355 | ERR485278 | GCA 902718335.1 | PDS000069819.1 |
| PDT000670440.2 | SAMEA2076210 | SAMEA2076210 | ERR485285 | GCA 902718375.1 | PDS000069819.1 |
| PDT000670441.2 | SAMEA2081356 | SAMEA2081356 | ERR357961 | GCA 902718425.1 | PDS000069819.1 |
| PDT000670442.2 | SAMEA2081359 | SAMEA2081359 | ERR485296 | GCA 902718355.1 | PDS000069819.1 |
| PDT000670443.2 | SAMEA2081358 | SAMEA2081358 | ERR357973 | GCA 902718415.1 | PDS000069819.1 |
| PDT000670444.2 | SAMEA2076215 | SAMEA2076215 | ERR485292 | GCA 902718295.1 | PDS000069819.1 |
| PDT000670445.2 | SAMEA2079968 | SAMEA2079968 | ERR485277 | GCA 902718345.1 | PDS000069819.1 |
| PDT000670446.2 | SAMEA2076214 | SAMEA2076214 | ERR485291 | GCA 902718325.1 | PDS000069819.1 |
| PDT000670447.2 | SAMEA2076207 | SAMEA2076207 | ERR485280 | GCA 902718405.1 | PDS000069819.1 |
| PDT000670448.2 | SAMEA1966928 | SAMEA1966928 | ERR357967 | GCA 902718435.1 | PDS000069819.1 |
| PDT000670449.2 | SAMEA2076208 | SAMEA2076208 | ERR357962 | GCA 902718395.1 | PDS000069819.1 |
| PDT000670450.2 | SAMEA1969048 | SAMEA1969048 | ERR485290 | GCA 902718385.1 | PDS000069819.1 |
| PDT000670451.2 | SAMEA2076212 | SAMEA2076212 | ERR485288 | GCA 902718305.1 | PDS000069819.1 |
| PDT000670452.2 | SAMEA2076217 | SAMEA2076217 | ERR357975 | GCA 902718365.1 | PDS000069819.1 |
| PDT000670453.2 | SAMEA2081362 | SAMEA2081362 | ERR357985 | GCA 902718465.1 | PDS000069819.1 |
| PDT000670454.2 | SAMEA2076218 | SAMEA2076218 | ERR357977 | GCA 902718475.1 | PDS000069819.1 |
| PDT000670455.2 | SAMEA2081361 | SAMEA2081361 | ERR485302 | GCA 902718485.1 | PDS000069819.1 |
| PDT000670456.2 | SAMEA2081360 | SAMEA2081360 | ERR485299 | GCA 902718525.1 | PDS000069819.1 |
| PDT000670457.2 | SAMEA2076221 | SAMEA2076221 | ERR485301 | GCA 902718445.1 | PDS000069819.1 |
| PDT000670458.2 | SAMEA2076223 | SAMEA2076223 | ERR485304 | GCA 902718505.1 | PDS000069819.1 |
| PDT000670459.2 | SAMEA2076220 | SAMEA2076220 | ERR485300 | GCA 902718495.1 | PDS000069819.1 |
| PDT000670460.2 | SAMEA2076219 | SAMEA2076219 | ERR357978 | GCA 902718455.1 | PDS000069819.1 |
| PDT000670461.2 | SAMEA2076222 | SAMEA2076222 | ERR485303 | GCA 902718515.1 | PDS000069819.1 |
| PDT000670462.2 | SAMEA2076224 | SAMEA2076224 | ERR357986 | GCA 902718535.1 | PDS000069819.1 |
| PDT000670463.2 | SAMEA2076225 | SAMEA2076225 | ERR485307 | GCA 902718545.1 | PDS000069819.1 |

|                |              |              |           |                 |                |
|----------------|--------------|--------------|-----------|-----------------|----------------|
| PDT000670464.2 | SAMEA2081458 | SAMEA2081458 | ERR357988 | GCA 902718595.1 | PDS000069819.1 |
| PDT000670465.2 | SAMEA2081459 | SAMEA2081459 | ERR357991 | GCA 902718605.1 | PDS000069819.1 |
| PDT000670466.2 | SAMEA2076226 | SAMEA2076226 | ERR357989 | GCA 902718555.1 | PDS000069819.1 |
| PDT000670467.2 | SAMEA2076231 | SAMEA2076231 | ERR485316 | GCA 902718635.1 | PDS000069819.1 |
| PDT000670468.2 | SAMEA2076229 | SAMEA2076229 | ERR357993 | GCA 902718645.1 | PDS000069819.1 |
| PDT000670469.2 | SAMEA2076230 | SAMEA2076230 | ERR485315 | GCA 902718575.1 | PDS000069819.1 |
| PDT000670471.2 | SAMEA2081460 | SAMEA2081460 | ERR357994 | GCA 902718625.1 | PDS000069819.1 |
| PDT000670472.2 | SAMEA2076228 | SAMEA2076228 | ERR357992 | GCA 902718565.1 | PDS000069819.1 |
| PDT000670473.2 | SAMEA2076227 | SAMEA2076227 | ERR485310 | GCA 902718615.1 | PDS000069819.1 |
| PDT000676037.2 | SAMEA2077305 | SAMEA2077305 | ERR358128 | GCA 902719935.1 | PDS000069819.1 |
| PDT000676047.2 | SAMEA2077311 | SAMEA2077311 | ERR353143 | GCA 902719955.1 | PDS000069819.1 |
| PDT000676055.2 | SAMEA2081674 | SAMEA2081674 | ERR485556 | GCA 902720155.1 | PDS000069819.1 |
| PDT000676056.2 | SAMEA2081673 | SAMEA2081673 | ERR485553 | GCA 902720175.1 | PDS000069819.1 |
| PDT000681545.2 | SAMEA2077315 | SAMEA2077315 | ERR485558 | GCA 902720115.1 | PDS000069819.1 |
| PDT000681546.2 | SAMEA1966432 | SAMEA1966432 | ERR485564 | GCA 902720165.1 | PDS000069819.1 |
| PDT000681547.2 | SAMEA2081677 | SAMEA2081677 | ERR485565 | GCA 902720205.1 | PDS000069819.1 |
| PDT000681548.2 | SAMEA2077575 | SAMEA2077575 | ERR485570 | GCA 902720235.1 | PDS000069819.1 |
| PDT000681549.2 | SAMEA2077571 | SAMEA2077571 | ERR353154 | GCA 902720055.1 | PDS000069819.1 |
| PDT000681550.2 | SAMEA2081679 | SAMEA2081679 | ERR485571 | GCA 902720105.1 | PDS000069819.1 |
| PDT000681551.2 | SAMEA2077314 | SAMEA2077314 | ERR353148 | GCA 902720185.1 | PDS000069819.1 |
| PDT000681552.2 | SAMEA2077312 | SAMEA2077312 | ERR485554 | GCA 902720125.1 | PDS000069819.1 |
| PDT000681553.2 | SAMEA2077313 | SAMEA2077313 | ERR353146 | GCA 902720135.1 | PDS000069819.1 |
| PDT000681554.2 | SAMEA2077574 | SAMEA2077574 | ERR485569 | GCA 902720225.1 | PDS000069819.1 |
| PDT000681555.2 | SAMEA2081676 | SAMEA2081676 | ERR353153 | GCA 902720215.1 | PDS000069819.1 |
| PDT000681556.2 | SAMEA2077316 | SAMEA2077316 | ERR485560 | GCA 902720085.1 | PDS000069819.1 |
| PDT000681557.2 | SAMEA2077576 | SAMEA2077576 | ERR353163 | GCA 902720065.1 | PDS000069819.1 |
| PDT000681558.2 | SAMEA2081678 | SAMEA2081678 | ERR353159 | GCA 902720145.1 | PDS000069819.1 |
| PDT000681559.2 | SAMEA2077572 | SAMEA2077572 | ERR353157 | GCA 902720195.1 | PDS000069819.1 |
| PDT000681560.2 | SAMEA2081675 | SAMEA2081675 | ERR353150 | GCA 902720095.1 | PDS000069819.1 |
| PDT000681561.2 | SAMEA2077317 | SAMEA2077317 | ERR353152 | GCA 902720075.1 | PDS000069819.1 |
| PDT000681562.2 | SAMEA2077573 | SAMEA2077573 | ERR485567 | GCA 902720245.1 | PDS000069819.1 |
| PDT000681566.2 | SAMEA2077577 | SAMEA2077577 | ERR485573 | GCA 902720335.1 | PDS000069819.1 |
| PDT000681570.2 | SAMEA2077578 | SAMEA2077578 | ERR353166 | GCA 902720315.1 | PDS000069819.1 |
| PDT000681589.2 | SAMEA2081693 | SAMEA2081693 | ERR353200 | GCA 902720515.1 | PDS000069819.1 |
| PDT000681596.2 | SAMEA2077824 | SAMEA2077824 | ERR353201 | GCA 902720605.1 | PDS000069819.1 |
| PDT000681606.2 | SAMEA2077830 | SAMEA2077830 | ERR485619 | GCA 902720735.1 | PDS000069819.1 |
| PDT000681615.2 | SAMEA2081770 | SAMEA2081770 | ERR485624 | GCA 902720775.1 | PDS000069819.1 |
| PDT000681616.2 | SAMEA2077835 | SAMEA2077835 | ERR485626 | GCA 902720715.1 | PDS000069819.1 |
| PDT000681618.2 | SAMEA2077837 | SAMEA2077837 | ERR485631 | GCA 902720695.1 | PDS000069819.1 |
| PDT000681621.2 | SAMEA2077834 | SAMEA2077834 | ERR353216 | GCA 902720855.1 | PDS000069819.1 |
| PDT000681768.2 | SAMEA2080331 | SAMEA2080331 | ERR353287 | GCA 902722305.1 | PDS000069819.1 |
| PDT000681769.2 | SAMEA2076499 | SAMEA2076499 | ERR353279 | GCA 902722355.1 | PDS000069819.1 |
| PDT000681770.2 | SAMEA2076502 | SAMEA2076502 | ERR353283 | GCA 902722415.1 | PDS000069819.1 |
| PDT000681771.2 | SAMEA2076503 | SAMEA2076503 | ERR517355 | GCA 902722375.1 | PDS000069819.1 |
| PDT000681772.2 | SAMEA1966374 | SAMEA1966374 | ERR353285 | GCA 902722385.1 | PDS000069819.1 |
| PDT000681773.2 | SAMEA2076500 | SAMEA2076500 | ERR353280 | GCA 902722315.1 | PDS000069819.1 |
| PDT000681774.2 | SAMEA2080332 | SAMEA2080332 | ERR517359 | GCA 902722325.1 | PDS000069819.1 |
| PDT000681775.2 | SAMEA2076505 | SAMEA2076505 | ERR353289 | GCA 902722365.1 | PDS000069819.1 |
| PDT000681776.2 | SAMEA2076504 | SAMEA2076504 | ERR517357 | GCA 902722405.1 | PDS000069819.1 |
| PDT000681777.2 | SAMEA2080328 | SAMEA2080328 | ERR353278 | GCA 902722335.1 | PDS000069819.1 |
| PDT000681779.2 | SAMEA2076501 | SAMEA2076501 | ERR353282 | GCA 902722435.1 | PDS000069819.1 |
| PDT000681780.2 | SAMEA2076768 | SAMEA2076768 | ERR517363 | GCA 902722505.1 | PDS000069819.1 |
| PDT000681781.2 | SAMEA2076766 | SAMEA2076766 | ERR353291 | GCA 902722445.1 | PDS000069819.1 |
| PDT000681782.2 | SAMEA2076767 | SAMEA2076767 | ERR517361 | GCA 902722525.1 | PDS000069819.1 |
| PDT000681783.2 | SAMEA2080333 | SAMEA2080333 | ERR517362 | GCA 902722485.1 | PDS000069819.1 |
| PDT000681784.2 | SAMEA2080335 | SAMEA2080335 | ERR353299 | GCA 902722455.1 | PDS000069819.1 |
| PDT000681785.2 | SAMEA2076770 | SAMEA2076770 | ERR517366 | GCA 902722475.1 | PDS000069819.1 |
| PDT000681786.2 | SAMEA2076769 | SAMEA2076769 | ERR353295 | GCA 902722495.1 | PDS000069819.1 |
| PDT000681875.2 | SAMEA2077605 | SAMEA2077605 | ERR496914 | GCA 902723425.1 | PDS000069819.1 |
| PDT000681876.2 | SAMEA2077603 | SAMEA2077603 | ERR496911 | GCA 902723455.1 | PDS000069819.1 |
| PDT000681877.2 | SAMEA2080431 | SAMEA2080431 | ERR496912 | GCA 902723415.1 | PDS000069819.1 |
| PDT000681878.2 | SAMEA1969346 | SAMEA1969346 | ERR496904 | GCA 902723435.1 | PDS000069819.1 |
| PDT000681880.2 | SAMEA2077601 | SAMEA2077601 | ERR496907 | GCA 902723445.1 | PDS000069819.1 |
| PDT000681881.2 | SAMEA2077602 | SAMEA2077602 | ERR360348 | GCA 902723465.1 | PDS000069819.1 |
| PDT000681882.2 | SAMEA2077606 | SAMEA2077606 | ERR496916 | GCA 902723515.1 | PDS000069819.1 |
| PDT000681884.2 | SAMEA2080432 | SAMEA2080432 | ERR360355 | GCA 902723555.1 | PDS000069819.1 |
| PDT000681885.2 | SAMEA2080430 | SAMEA2080430 | ERR496909 | GCA 902723545.1 | PDS000069819.1 |
| PDT000681886.2 | SAMEA2077607 | SAMEA2077607 | ERR360357 | GCA 902723585.1 | PDS000069819.1 |

|                |               |               |             |                 |                |
|----------------|---------------|---------------|-------------|-----------------|----------------|
| PDT000681889.2 | SAMEA2077600  | SAMEA2077600  | ERR360345   | GCA 902723525.1 | PDS000069819.1 |
| PDT000681890.2 | SAMEA1972906  | SAMEA1972906  | ERR496910   | GCA 902723475.1 | PDS000069819.1 |
| PDT000681891.2 | SAMEA2077604  | SAMEA2077604  | ERR496913   | GCA 902723535.1 | PDS000069819.1 |
| PDT000681892.2 | SAMEA2080429  | SAMEA2080429  | ERR360346   | GCA 902723485.1 | PDS000069819.1 |
| PDT000681900.2 | SAMEA2077608  | SAMEA2077608  | ERR496919   | GCA 902723665.1 | PDS000069819.1 |
| PDT000805014.2 | SAMEA6125702  | SAMEA6125702  | ERR3623565  | GCA 903987995.1 | PDS000069185.2 |
| PDT000822226.1 | SAMEA2724989  | SAMEA2724989  | ERR375856   | GCA 015543915.1 | PDS000069185.2 |
| PDT000822227.1 | SAMEA2724998  | SAMEA2724998  | ERR375858   | GCA 015543835.1 | PDS000069185.2 |
| PDT000822228.1 | SAMEA2725000  | SAMEA2725000  | ERR375859   | GCA 015543875.1 | PDS000069185.2 |
| PDT000822229.1 | SAMEA2725002  | SAMEA2725002  | ERR375860   | GCA 015543815.1 | PDS000069185.2 |
| PDT000822230.1 | SAMEA2725003  | SAMEA2725003  | ERR375861   | GCA 015543635.1 | PDS000069185.2 |
| PDT000822232.1 | SAMEA2725005  | SAMEA2725005  | ERR375863   | GCA 015543775.1 | PDS000069185.2 |
| PDT000822239.1 | SAMEA2725001  | SAMEA2725001  | ERR375877   | GCA 015543755.1 | PDS000069185.2 |
| PDT000258927.2 | SAMN03763930  | SAMN03763930  | SRR5912678  | GCA 002633765.1 | PDS000069012.4 |
| PDT000812895.1 | SAMN10038960  | SAMN10038960  | SRR7839946  | GCA 015567815.1 | PDS000069012.4 |
| PDT000791074.2 | SAMEA70087918 | SAMEA70087918 | ERR2506372  | GCA 903808155.1 | PDS000069787.1 |
| PDT000791263.2 | SAMEA70243168 | SAMEA70243168 | ERR2525270  | GCA 903810055.1 | PDS000069787.1 |
| PDT000804963.2 | SAMEA6125850  | SAMEA6125850  | ERR3623779  | GCA 903987485.1 | PDS000069787.1 |
| PDT000804966.2 | SAMEA6125854  | SAMEA6125854  | ERR3623781  | GCA 903987565.1 | PDS000069787.1 |
| PDT000804971.2 | SAMEA6125848  | SAMEA6125848  | ERR3623780  | GCA 903987535.1 | PDS000069787.1 |
| PDT000804972.2 | SAMEA6125858  | SAMEA6125858  | ERR3623788  | GCA 903987555.1 | PDS000069787.1 |
| PDT000804973.2 | SAMEA6125843  | SAMEA6125843  | ERR3623778  | GCA 903987595.1 | PDS000069787.1 |
| PDT000804979.2 | SAMEA6125855  | SAMEA6125855  | ERR3623791  | GCA 903987645.1 | PDS000069787.1 |
| PDT000804987.2 | SAMEA6125870  | SAMEA6125870  | ERR3623796  | GCA 903987715.1 | PDS000069787.1 |
| PDT000805042.2 | SAMEA6125893  | SAMEA6125893  | ERR3623821  | GCA 903988275.1 | PDS000069787.1 |
| PDT000258925.2 | SAMEA5886155  | SAMEA5886155  | ERR3497292  | GCA 903989915.1 | PDS000069787.1 |
| PDT000238786.2 | SAMN03893268  | SAMN03893268  | SRR5909142  | GCA 002273585.1 | PDS000069052.1 |
| PDT000238787.2 | SAMN03893265  | SAMN03893265  | SRR5909145  | GCA 002273625.1 | PDS000069052.1 |
| PDT000238788.2 | SAMN03893264  | SAMN03893264  | SRR5909146  | GCA 002273605.1 | PDS000069052.1 |
| PDT000238789.2 | SAMN03893269  | SAMN03893269  | SRR5909141  | GCA 002273615.1 | PDS000069052.1 |
| PDT000238792.2 | SAMN03893272  | SAMN03893272  | SRR5909150  | GCA 002273695.1 | PDS000069052.1 |
| PDT000238795.2 | SAMN03893276  | SAMN03893276  | SRR5909153  | GCA 002273755.1 | PDS000069052.1 |
| PDT000238796.2 | SAMN03893279  | SAMN03893279  | SRR5909156  | GCA 002273785.1 | PDS000069052.1 |
| PDT000238798.2 | SAMN03893281  | SAMN03893281  | SRR5909158  | GCA 002273825.1 | PDS000069052.1 |
| PDT000238799.2 | SAMN03893282  | SAMN03893282  | SRR5909159  | GCA 002273835.1 | PDS000069052.1 |
| PDT000238800.2 | SAMN03893285  | SAMN03893285  | SRR5909266  | GCA 002273875.1 | PDS000069052.1 |
| PDT000238802.2 | SAMN03893288  | SAMN03893288  | SRR5909274  | GCA 002273905.1 | PDS000069052.1 |
| PDT000238803.2 | SAMN03893289  | SAMN03893289  | SRR5909273  | GCA 002273915.1 | PDS000069052.1 |
| PDT000238808.2 | SAMN03893297  | SAMN03893297  | SRR5909284  | GCA 002274015.1 | PDS000069052.1 |
| PDT000238811.2 | SAMN03893302  | SAMN03893302  | SRR5909291  | GCA 002274095.1 | PDS000069052.1 |
| PDT000238872.2 | SAMN03893270  | SAMN03893270  | SRR5909140  | GCA 002275295.1 | PDS000069052.1 |
| PDT000238874.2 | SAMN03893287  | SAMN03893287  | SRR5909271  | GCA 002275355.1 | PDS000069052.1 |
| PDT000238876.2 | SAMN03893280  | SAMN03893280  | SRR5909157  | GCA 002275385.1 | PDS000069052.1 |
| PDT000238877.2 | SAMN03893292  | SAMN03893292  | SRR5909278  | GCA 002275435.1 | PDS000069052.1 |
| PDT000243267.2 | SAMN03893283  | SAMN03893283  | SRR5909160  | GCA 002304615.1 | PDS000069052.1 |
| PDT000188796.2 | SAMN05721773  | SAMN05721773  | SRR5481524  | GCA 001997145.1 | PDS000069053.1 |
| PDT000204359.2 | SAMN05967212  | SAMN05967212  | SRR5381890  | GCA 002092995.1 | PDS000069053.1 |
| PDT000204360.3 | SAMN05969311  | SAMN05969311  | SRR5381888  | GCA 002093005.2 | PDS000069053.1 |
| PDT000377881.2 | SAMN09534357  | SAMN09534357  | SRR7464619  | GCA 003403155.1 | PDS000069053.1 |
| PDT00044273.1  | SAMEA53074918 | SAMEA53074918 | ERR2506197  | GCA 015606485.1 | PDS000069053.1 |
| PDT000551278.1 | SAMN12414146  | SAMN12414146  | SRR9860559  | GCA 015602985.1 | PDS000069850.1 |
| PDT000551320.1 | SAMN12414142  | SAMN12414142  | SRR9860608  | GCA 015602785.1 | PDS000069850.1 |
| PDT000655905.1 | SAMN13687271  | SAMN13687271  | SRR10842775 | GCA 015594205.1 | PDS000069850.1 |
| PDT000655910.1 | SAMN13687302  | SAMN13687302  | SRR10842780 | GCA 015594245.1 | PDS000069850.1 |
| PDT000655911.1 | SAMN13687301  | SAMN13687301  | SRR10842781 | GCA 015594165.1 | PDS000069850.1 |
| PDT000655912.1 | SAMN13687300  | SAMN13687300  | SRR10842782 | GCA 015594185.1 | PDS000069850.1 |
| PDT000655913.1 | SAMN13687299  | SAMN13687299  | SRR10842783 | GCA 015594215.1 | PDS000069850.1 |
| PDT000655914.1 | SAMN13687298  | SAMN13687298  | SRR10842784 | GCA 015593665.1 | PDS000069850.1 |
| PDT000655915.1 | SAMN13687297  | SAMN13687297  | SRR10842785 | GCA 015593625.1 | PDS000069850.1 |
| PDT000655916.1 | SAMN13687295  | SAMN13687295  | SRR10842787 | GCA 015593585.1 | PDS000069850.1 |
| PDT000655919.1 | SAMN13687293  | SAMN13687293  | SRR10842790 | GCA 015593765.1 | PDS000069850.1 |
| PDT000655920.1 | SAMN13687292  | SAMN13687292  | SRR10842791 | GCA 015593685.1 | PDS000069850.1 |
| PDT000655921.1 | SAMN13687291  | SAMN13687291  | SRR10842792 | GCA 015593725.1 | PDS000069850.1 |
| PDT000655935.1 | SAMN13687277  | SAMN13687277  | SRR10842807 | GCA 015593855.1 | PDS000069850.1 |
| PDT000078926.2 | SAMEA1324544  | SAMEA1324544  | ERR134701   | GCA 001193795.1 | PDS000069244.2 |
| PDT000079114.2 | SAMEA1324577  | SAMEA1324577  | ERR134679   | GCA 001197735.1 | PDS000069244.2 |
| PDT000079133.2 | SAMEA1710083  | SAMEA1710083  | ERR249317   | GCA 001198115.1 | PDS000069244.2 |
| PDT000079164.2 | SAMEA1324668  | SAMEA1324668  | ERR134721   | GCA 001198775.1 | PDS000069244.2 |

|                |                |                |             |                 |                |
|----------------|----------------|----------------|-------------|-----------------|----------------|
| PDT000079252.2 | SAMEA1710104   | SAMEA1710104   | ERR249324   | GCA 001200635.1 | PDS000069244.2 |
| PDT000079327.2 | SAMEA1324686   | SAMEA1324686   | ERR338632   | GCA 001202175.1 | PDS000069244.2 |
| PDT000079582.2 | SAMEA1466527   | SAMEA1466527   | ERR137953   | GCA 001207595.1 | PDS000069244.2 |
| PDT000079636.2 | SAMEA1324643   | SAMEA1324643   | ERR134694   | GCA 001208745.1 | PDS000069244.2 |
| PDT000079639.2 | SAMEA1324762   | SAMEA1324762   | ERR302841   | GCA 001208805.1 | PDS000069244.2 |
| PDT000081030.2 | SAMEA1324739   | SAMEA1324739   | ERR338633   | GCA 001262175.1 | PDS000069244.2 |
| PDT000090469.2 | SAMEA1324641   | SAMEA1324641   | ERR134695   | GCA 001352475.1 | PDS000069244.2 |
| PDT000090492.2 | SAMEA1324715   | SAMEA1324715   | ERR134724   | GCA 001352935.1 | PDS000069244.2 |
| PDT000852685.1 | SAMN12642247   | SAMN12642247   | SRR11016262 | GCA 014832125.1 | PDS000069244.2 |
| PDT000088238.1 | SAMEA2493771   | SAMEA2493771   | ERR493447   | GCA 015619885.1 | PDS000068044.1 |
| PDT000088239.1 | SAMEA2493772   | SAMEA2493772   | ERR493448   | GCA 015619805.1 | PDS000068044.1 |
| PDT000088244.1 | SAMEA2493779   | SAMEA2493779   | ERR493455   | GCA 015619845.1 | PDS000068044.1 |
| PDT000088248.1 | SAMEA2493788   | SAMEA2493788   | ERR493464   | GCA 015619685.1 | PDS000068044.1 |
| PDT000088249.1 | SAMEA2493790   | SAMEA2493790   | ERR493466   | GCA 015619225.1 | PDS000068044.1 |
| PDT000088251.1 | SAMEA2493793   | SAMEA2493793   | ERR493469   | GCA 015618805.1 | PDS000068044.1 |
| PDT000108628.1 | SAMN03359356   | SAMN03359356   | SRR1814543  | GCA 015618105.1 | PDS000068044.1 |
| PDT000112077.2 | SAMEA1469631   | SAMEA1469631   | ERR158723   | GCA 900042605.1 | PDS000069429.1 |
| PDT000112263.2 | SAMEA1464218   | SAMEA1464218   | ERR118335   | GCA 900042005.1 | PDS000069429.1 |
| PDT000116136.2 | SAMEA1469637   | SAMEA1469637   | ERR158726   | GCA 900041195.1 | PDS000069429.1 |
| PDT000116171.2 | SAMEA1469626   | SAMEA1469626   | ERR158720   | GCA 900042585.1 | PDS000069429.1 |
| PDT000116346.2 | SAMEA1469597   | SAMEA1469597   | ERR158725   | GCA 900064435.1 | PDS000069429.1 |
| PDT000117124.2 | SAMEA1317495   | SAMEA1317495   | ERR107871   | GCA 900045955.1 | PDS000069429.1 |
| PDT000117335.2 | SAMEA1464708   | SAMEA1464708   | ERR118512   | GCA 900044775.1 | PDS000069429.1 |
| PDT000118341.2 | SAMEA1464604   | SAMEA1464604   | ERR118506   | GCA 900052665.1 | PDS000069429.1 |
| PDT000118484.2 | SAMEA1317563   | SAMEA1317563   | ERR107859   | GCA 900038495.1 | PDS000069429.1 |
| PDT000118496.2 | SAMEA1464379   | SAMEA1464379   | ERR118434   | GCA 900040325.1 | PDS000069429.1 |
| PDT000118600.2 | SAMEA1469620   | SAMEA1469620   | ERR158718   | GCA 900042575.1 | PDS000069429.1 |
| PDT000118813.2 | SAMEA1317489   | SAMEA1317489   | ERR107872   | GCA 900045965.1 | PDS000069429.1 |
| PDT000119475.2 | SAMEA1469601   | SAMEA1469601   | ERR158719   | GCA 900064445.1 | PDS000069429.1 |
| PDT000772852.2 | SAMEA4008594   | SAMEA4008594   | ERR1723971  | GCA 903799985.1 | PDS000069429.1 |
| PDT000066811.3 | SAMN03255464   | SAMN03255464   | SRR1955819  | GCA 001019435.2 | PDS000069238.1 |
| PDT000066814.3 | SAMN03255479   | SAMN03255479   | SRR1955869  | GCA 001019495.2 | PDS000069238.1 |
| PDT000326663.2 | SAMN04901609   | SAMN04901609   | SRR4417447  | GCA 003193705.1 | PDS000069238.1 |
| PDT000772688.2 | SAMEA103891565 | SAMEA103891565 | ERR2533794  | GCA 903813255.1 | PDS000069238.1 |
| PDT000772689.2 | SAMEA103891566 | SAMEA103891566 | ERR2533795  | GCA 903813265.1 | PDS000069238.1 |
| PDT000079107.2 | SAMEA1324522   | SAMEA1324522   | ERR134839   | GCA 001197595.1 | PDS000069272.3 |
| PDT000090501.2 | SAMEA1324736   | SAMEA1324736   | ERR134841   | GCA 001353115.1 | PDS000069272.3 |
| PDT000852698.1 | SAMN12642233   | SAMN12642233   | SRR11016278 | GCA 014832385.1 | PDS000069272.3 |
| PDT000852704.1 | SAMN12642227   | SAMN12642227   | SRR11016231 | GCA 014832485.1 | PDS000069272.3 |
| PDT000852760.1 | SAMN12642169   | SAMN12642169   | SRR11016288 | GCA 014835955.1 | PDS000069272.3 |
| PDT000904263.1 | SAMN10689361   | SAMN10689361   | SRR8389048  | GCA 015714415.1 | PDS000069272.3 |
| PDT000904269.1 | SAMN10689351   | SAMN10689351   | SRR8389011  | GCA 015714545.1 | PDS000069272.3 |
| PDT000904271.1 | SAMN10689349   | SAMN10689349   | SRR11016775 | GCA 015714575.1 | PDS000069272.3 |
| PDT000066777.3 | SAMN03255453   | SAMN03255453   | SRR1955613  | GCA 001018775.2 | PDS000069017.1 |
| PDT000066807.3 | SAMN03255455   | SAMN03255455   | SRR1955618  | GCA 001019355.2 | PDS000069017.1 |
| PDT000202945.2 | SAMN06624119   | SAMN06624119   | SRR5364258  | GCA 002088055.1 | PDS000069017.1 |
| PDT000254966.2 | SAMN07312405   | SAMN07312405   | SRR5868513  | GCA 002554295.1 | PDS000069017.1 |
| PDT000079401.2 | SAMEA1710110   | SAMEA1710110   | ERR256893   | GCA 001203755.1 | PDS000069243.1 |
| PDT000079518.2 | SAMEA1324532   | SAMEA1324532   | ERR134614   | GCA 001206215.1 | PDS000069243.1 |
| PDT000079645.2 | SAMEA1710111   | SAMEA1710111   | ERR256892   | GCA 001208925.1 | PDS000069243.1 |
| PDT000079786.2 | SAMEA1710093   | SAMEA1710093   | ERR256891   | GCA 001211885.1 | PDS000069243.1 |
| PDT000079820.2 | SAMEA1466541   | SAMEA1466541   | ERR137989   | GCA 001212565.1 | PDS000069243.1 |
| PDT000090549.2 | SAMEA1466520   | SAMEA1466520   | ERR302826   | GCA 001354075.1 | PDS000069243.1 |
| PDT000090554.2 | SAMEA1466531   | SAMEA1466531   | ERR137991   | GCA 001354175.1 | PDS000069243.1 |
| PDT000090555.2 | SAMEA1466533   | SAMEA1466533   | ERR302828   | GCA 001354195.1 | PDS000069243.1 |
| PDT000080122.2 | SAMEA1030309   | SAMEA1030309   | ERR044582   | GCA 001225765.1 | PDS000069408.1 |
| PDT000080151.2 | SAMEA1030207   | SAMEA1030207   | ERR044585   | GCA 001226725.1 | PDS000069408.1 |
| PDT000080350.2 | SAMEA1030323   | SAMEA1030323   | ERR044592   | GCA 001234025.1 | PDS000069408.1 |
| PDT000080437.2 | SAMEA1030291   | SAMEA1030291   | ERR044583   | GCA 001237045.1 | PDS000069408.1 |
| PDT000080452.2 | SAMEA1030278   | SAMEA1030278   | ERR044584   | GCA 001237505.1 | PDS000069408.1 |
| PDT000080472.2 | SAMEA1030267   | SAMEA1030267   | ERR044587   | GCA 001238225.1 | PDS000069408.1 |
| PDT000080489.2 | SAMEA1030265   | SAMEA1030265   | ERR044591   | GCA 001238685.1 | PDS000069408.1 |
| PDT000790285.2 | SAMEA4008738   | SAMEA4008738   | ERR1715440  | GCA 903803185.1 | PDS000069408.1 |
| PDT000371669.2 | SAMN09847825   | SAMN09847825   | SRR7706371  | GCA 003431365.1 | PDS000068620.1 |
| PDT000408059.2 | SAMN09847830   | SAMN09847830   | SRR7706388  | GCA 003720205.1 | PDS000068620.1 |
| PDT000408071.2 | SAMN09847826   | SAMN09847826   | SRR7706411  | GCA 003720435.1 | PDS000068620.1 |
| PDT000408084.2 | SAMN09847828   | SAMN09847828   | SRR7706413  | GCA 003720715.1 | PDS000068620.1 |
| PDT000408085.2 | SAMN09847829   | SAMN09847829   | SRR7706412  | GCA 003720735.1 | PDS000068620.1 |



|                |                |                |             |                 |                |
|----------------|----------------|----------------|-------------|-----------------|----------------|
| PDT000408087.2 | SAMN09847827   | SAMN09847827   | SRR7706410  | GCA 003720775.1 | PDS000068620.1 |
| PDT000423410.1 | SAMEA4469706   | SAMEA4469706   | ERR1795928  | GCA 015608305.1 | PDS000067878.3 |
| PDT000423422.1 | SAMEA4469705   | SAMEA4469705   | ERR1800521  | GCA 015608025.1 | PDS000067878.3 |
| PDT000811416.1 | SAMEA4387511   | SAMEA4387511   | ERR1788986  | GCA 015581015.1 | PDS000067865.1 |
| PDT000811486.1 | SAMEA4387520   | SAMEA4387520   | ERR1789056  | GCA 015579875.1 | PDS000067865.1 |
| PDT000115656.2 | SAMEA1464309   | SAMEA1464309   | ERR118382   | GCA 900040215.1 | PDS000068316.1 |
| PDT000116788.2 | SAMEA1469661   | SAMEA1469661   | ERR158619   | GCA 900037865.1 | PDS000068316.1 |
| PDT000117151.2 | SAMEA1464189   | SAMEA1464189   | ERR118379   | GCA 900040205.1 | PDS000068316.1 |
| PDT000119183.2 | SAMEA1469577   | SAMEA1469577   | ERR158789   | GCA 900048395.1 | PDS000068316.1 |
| PDT000538364.1 | SAMEA104452081 | SAMEA104452081 | ERR2232574  | GCA 015604225.1 | PDS000068855.1 |
| PDT000538449.1 | SAMEA104452166 | SAMEA104452166 | ERR2232670  | GCA 015603485.1 | PDS000068855.1 |
| PDT000538477.1 | SAMEA104452194 | SAMEA104452194 | ERR2232707  | GCA 015603165.1 | PDS000068855.1 |
| PDT000078880.2 | SAMEA1324554   | SAMEA1324554   | ERR134867   | GCA 001192855.1 | PDS000068872.1 |
| PDT000079130.2 | SAMEA1466524   | SAMEA1466524   | ERR302751   | GCA 001198055.1 | PDS000068872.1 |
| PDT000079458.2 | SAMEA1324569   | SAMEA1324569   | ERR134866   | GCA 001204975.1 | PDS000068872.1 |
| PDT000090457.2 | SAMEA1324603   | SAMEA1324603   | ERR134868   | GCA 001352235.1 | PDS000068872.1 |
| PDT000066797.3 | SAMN03255482   | SAMN03255482   | SRR1955874  | GCA 001019125.2 | PDS000068891.1 |
| PDT000066816.3 | SAMN03255481   | SAMN03255481   | SRR1955873  | GCA 001019535.2 | PDS000068891.1 |
| PDT000112195.2 | SAMEA1469561   | SAMEA1469561   | ERR158739   | GCA 900042635.1 | PDS000069723.1 |
| PDT000115723.2 | SAMEA1469719   | SAMEA1469719   | ERR158735   | GCA 900044635.1 | PDS000069723.1 |
| PDT000115875.2 | SAMEA1464595   | SAMEA1464595   | ERR129313   | GCA 900047405.1 | PDS000069723.1 |
| PDT000119320.2 | SAMEA1317340   | SAMEA1317340   | ERR111065   | GCA 900031645.1 | PDS000069723.1 |
| PDT000116448.2 | SAMEA1464600   | SAMEA1464600   | ERR118586   | GCA 900045705.1 | PDS000067927.1 |
| PDT000116949.2 | SAMEA1317462   | SAMEA1317462   | ERR107800   | GCA 900040815.1 | PDS000067927.1 |
| PDT000117759.2 | SAMEA1317575   | SAMEA1317575   | ERR107892   | GCA 900038765.1 | PDS000067927.1 |
| PDT000116381.2 | SAMEA1469610   | SAMEA1469610   | ERR158626   | GCA 900042065.1 | PDS000067916.1 |
| PDT000117460.2 | SAMEA1317319   | SAMEA1317319   | ERR107839   | GCA 900038325.1 | PDS000067916.1 |
| PDT000117791.2 | SAMEA1469558   | SAMEA1469558   | ERR158629   | GCA 900051365.1 | PDS000067916.1 |
| PDT000116247.2 | SAMEA1317450   | SAMEA1317450   | ERR107850   | GCA 900035785.1 | PDS000068227.1 |
| PDT000118515.2 | SAMEA1317505   | SAMEA1317505   | ERR107924   | GCA 900035855.1 | PDS000068227.1 |
| PDT000119245.2 | SAMEA1464340   | SAMEA1464340   | ERR118479   | GCA 900039955.1 | PDS000068227.1 |
| PDT000766309.2 | SAMN14906880   | SAMN14906880   | SRR11787378 | GCA 013338765.1 | PDS000068584.1 |
| PDT000813892.1 | SAMN12775938   | SAMN12775938   | SRR10178966 | GCA 009462225.1 | PDS000068584.1 |
| PDT000813902.1 | SAMN12775931   | SAMN12775931   | SRR10178974 | GCA 009462405.1 | PDS000068584.1 |
| PDT000408086.2 | SAMN09847822   | SAMN09847822   | SRR7706370  | GCA 003720745.1 | PDS000068595.1 |
| PDT000408088.2 | SAMN09847819   | SAMN09847819   | SRR7706373  | GCA 003720795.1 | PDS000068595.1 |
| PDT000408089.2 | SAMN09847820   | SAMN09847820   | SRR7706374  | GCA 003720815.1 | PDS000068595.1 |
| PDT000079783.2 | SAMEA1466508   | SAMEA1466508   | ERR137945   | GCA 001211825.1 | PDS000068626.1 |
| PDT000090545.2 | SAMEA1466514   | SAMEA1466514   | ERR302782   | GCA 001353995.1 | PDS000068626.1 |
| PDT000090552.2 | SAMEA1466529   | SAMEA1466529   | ERR302780   | GCA 001354135.1 | PDS000068626.1 |
| PDT000082727.2 | SAMN03753598   | SAMN03753598   | SRR2059974  | GCA 001275905.1 | PDS000069172.1 |
| PDT000082728.2 | SAMN03753599   | SAMN03753599   | SRR2059975  | GCA 001275925.1 | PDS000069172.1 |
| PDT000082729.2 | SAMN03753624   | SAMN03753624   | SRR2059976  | GCA 001275945.1 | PDS000069172.1 |
| PDT000083773.2 | SAMEA2384320   | SAMEA2384320   | ERR554244   | GCA 001289305.1 | PDS000069138.1 |
| PDT000083858.2 | SAMEA2383914   | SAMEA2383914   | ERR554123   | GCA 001291005.1 | PDS000069138.1 |
| PDT000083861.2 | SAMEA2384367   | SAMEA2384367   | ERR554290   | GCA 001291065.1 | PDS000069138.1 |
| PDT000117070.2 | SAMEA1469551   | SAMEA1469551   | ERR158646   | GCA 900038575.1 | PDS000069734.1 |
| PDT000118420.2 | SAMEA1317432   | SAMEA1317432   | ERR107959   | GCA 900041975.1 | PDS000069734.1 |
| PDT000119238.2 | SAMEA1317328   | SAMEA1317328   | ERR107865   | GCA 900044905.1 | PDS000069734.1 |
| PDT000444223.1 | SAMEA53035168  | SAMEA53035168  | ERR2506147  | GCA 015606205.1 | PDS000067846.1 |
| PDT000444225.1 | SAMEA53037418  | SAMEA53037418  | ERR2506149  | GCA 015606185.1 | PDS000067846.1 |
| PDT000811564.1 | SAMEA4387171   | SAMEA4387171   | ERR1789134  | GCA 015577735.1 | PDS000067853.1 |
| PDT000444241.1 | SAMEA53049418  | SAMEA53049418  | ERR2506165  | GCA 015605885.1 | PDS000067843.1 |
| PDT000444244.1 | SAMEA53051668  | SAMEA53051668  | ERR2506168  | GCA 015605785.1 | PDS000067843.1 |
| PDT000444281.1 | SAMEA53081668  | SAMEA53081668  | ERR2506205  | GCA 015606505.1 | PDS000067840.1 |
| PDT000444283.1 | SAMEA53083168  | SAMEA53083168  | ERR2506207  | GCA 015605445.1 | PDS000067840.1 |
| PDT000117944.2 | SAMEA1464395   | SAMEA1464395   | ERR129254   | GCA 900041925.1 | PDS000067838.1 |
| PDT000119324.2 | SAMEA1469677   | SAMEA1469677   | ERR158625   | GCA 900020385.1 | PDS000067838.1 |
| PDT000117567.2 | SAMEA1464283   | SAMEA1464283   | ERR118528   | GCA 900022605.1 | PDS000067960.1 |
| PDT000119385.2 | SAMEA1464244   | SAMEA1464244   | ERR118389   | GCA 900022635.1 | PDS000067960.1 |
| PDT000116427.2 | SAMEA1464504   | SAMEA1464504   | ERR129268   | GCA 900037715.1 | PDS000067994.1 |
| PDT000117298.2 | SAMEA1464648   | SAMEA1464648   | ERR129270   | GCA 900047325.1 | PDS000067994.1 |
| PDT000116350.2 | SAMEA1469590   | SAMEA1469590   | ERR158639   | GCA 900037915.1 | PDS000068005.1 |
| PDT000117286.2 | SAMEA1464399   | SAMEA1464399   | ERR129257   | GCA 900022595.1 | PDS000068005.1 |
| PDT000813957.1 | SAMN12775876   | SAMN12775876   | SRR10179140 | GCA 009463515.1 | PDS000068447.1 |
| PDT000813968.1 | SAMN12775868   | SAMN12775868   | SRR10179229 | GCA 009463675.1 | PDS000068447.1 |
| PDT000238848.2 | SAMN03893398   | SAMN03893398   | SRR5909163  | GCA 002274845.1 | PDS000068454.1 |
| PDT000813897.1 | SAMN12775936   | SAMN12775936   | SRR10178968 | GCA 009462325.1 | PDS000068596.1 |

|                |                |                |             |                 |                |
|----------------|----------------|----------------|-------------|-----------------|----------------|
| PDT000813916.1 | SAMN12775917   | SAMN12775917   | SRR10178989 | GCA 009462695.1 | PDS000068596.1 |
| PDT000408080.2 | SAMN09847853   | SAMN09847853   | SRR7706417  | GCA 003720635.1 | PDS000068597.1 |
| PDT000408083.2 | SAMN09847851   | SAMN09847851   | SRR7706415  | GCA 003720685.1 | PDS000068597.1 |
| PDT000408052.2 | SAMN09847862   | SAMN09847862   | SRR7706366  | GCA 003720075.1 | PDS000068594.1 |
| PDT000408106.2 | SAMN09847863   | SAMN09847863   | SRR7706409  | GCA 003721195.1 | PDS000068594.1 |
| PDT000422299.2 | SAMD00148192   | SAMD00148192   | DRR155406   | GCA 003945405.1 | PDS000068587.1 |
| PDT000422300.2 | SAMD00148193   | SAMD00148193   | DRR155407   | GCA 003945425.1 | PDS000068587.1 |
| PDT000766289.2 | SAMN14906900   | SAMN14906900   | SRR11787420 | GCA 013338365.1 | PDS000068709.1 |
| PDT000813814.1 | SAMN12776018   | SAMN12776018   | SRR10179222 | GCA 009460655.1 | PDS000068709.1 |
| PDT000371221.2 | SAMD00083462   | SAMD00083462   | DRR107102   | GCA 003417855.1 | PDS000068710.1 |
| PDT000371333.2 | SAMD00083567   | SAMD00083567   | DRR107207   | GCA 003421005.1 | PDS000068710.1 |
| PDT000371220.2 | SAMD00083461   | SAMD00083461   | DRR107101   | GCA 003417795.1 | PDS000068711.1 |
| PDT000371332.2 | SAMD00083566   | SAMD00083566   | DRR107206   | GCA 003420985.1 | PDS000068711.1 |
| PDT000371230.2 | SAMD00083471   | SAMD00083471   | DRR107111   | GCA 003418345.1 | PDS000068702.1 |
| PDT000371343.2 | SAMD00083577   | SAMD00083577   | DRR107217   | GCA 003421205.1 | PDS000068702.1 |
| PDT000371224.2 | SAMD00083465   | SAMD00083465   | DRR107105   | GCA 003418025.1 | PDS000068707.1 |
| PDT000371335.2 | SAMD00083569   | SAMD00083569   | DRR107209   | GCA 003421045.1 | PDS000068707.1 |
| PDT000371226.2 | SAMD00083467   | SAMD00083467   | DRR107107   | GCA 003418135.1 | PDS000068705.1 |
| PDT000371338.2 | SAMD00083572   | SAMD00083572   | DRR107212   | GCA 003421105.1 | PDS000068705.1 |
| PDT000371222.2 | SAMD00083463   | SAMD00083463   | DRR107103   | GCA 003417895.1 | PDS000068708.1 |
| PDT000371334.2 | SAMD00083568   | SAMD00083568   | DRR107208   | GCA 003421025.1 | PDS000068708.1 |
| PDT000371229.2 | SAMD00083470   | SAMD00083470   | DRR107110   | GCA 003418275.1 | PDS000068703.1 |
| PDT000371341.2 | SAMD00083575   | SAMD00083575   | DRR107215   | GCA 003421165.1 | PDS000068703.1 |
| PDT000371225.2 | SAMD00083466   | SAMD00083466   | DRR107106   | GCA 003418075.1 | PDS000068706.1 |
| PDT000371336.2 | SAMD00083570   | SAMD00083570   | DRR107210   | GCA 003421065.1 | PDS000068706.1 |
| PDT000766338.2 | SAMN14906850   | SAMN14906850   | SRR11787457 | GCA 013339345.1 | PDS000068833.1 |
| PDT000813726.1 | SAMN12776106   | SAMN12776106   | SRR10179124 | GCA 009458905.1 | PDS000068833.1 |
| PDT000335326.2 | SAMN08717693   | SAMN08717693   | SRR7983664  | GCA 003237675.1 | PDS000068823.1 |
| PDT000335360.2 | SAMN08717687   | SAMN08717687   | SRR7983683  | GCA 003238345.1 | PDS000068823.1 |
| PDT000335291.2 | SAMN08717763   | SAMN08717763   | SRR7983561  | GCA 003236975.1 | PDS000068824.1 |
| PDT000335293.2 | SAMN08717762   | SAMN08717762   | SRR7983560  | GCA 003236985.1 | PDS000068824.1 |
| PDT000766261.2 | SAMN14906926   | SAMN14906926   | SRR11787437 | GCA 013337825.1 | PDS000068947.1 |
| PDT000813652.1 | SAMN12776180   | SAMN12776180   | SRR10179086 | GCA 009457415.1 | PDS000068947.1 |
| PDT000766266.2 | SAMN14906922   | SAMN14906922   | SRR11787442 | GCA 013337905.1 | PDS000068935.1 |
| PDT000813664.1 | SAMN12776169   | SAMN12776169   | SRR10179098 | GCA 009457655.1 | PDS000068935.1 |
| PDT000066805.3 | SAMN03255447   | SAMN03255447   | SRR1955591  | GCA 001019295.2 | PDS000068929.1 |
| PDT000790222.2 | SAMEA4008678   | SAMEA4008678   | ERR1715380  | GCA 903800855.1 | PDS000068929.1 |
| PDT000079337.2 | SAMEA1324653   | SAMEA1324653   | ERR134632   | GCA 001202395.1 | PDS000068938.1 |
| PDT000090443.2 | SAMEA1324563   | SAMEA1324563   | ERR134642   | GCA 001351955.1 | PDS000068938.1 |
| PDT000083785.2 | SAMEA2383890   | SAMEA2383890   | ERR554099   | GCA 001289545.1 | PDS000069127.1 |
| PDT000083873.2 | SAMEA2384391   | SAMEA2384391   | ERR554314   | GCA 001291305.1 | PDS000069127.1 |
| PDT000791296.2 | SAMN12735218   | SAMN12735218   | SRR10112234 | GCA 013413435.1 | PDS000069306.1 |
| PDT000791297.2 | SAMN12735219   | SAMN12735219   | SRR10112233 | GCA 013413445.1 | PDS000069306.1 |
| PDT000118091.2 | SAMEA1464277   | SAMEA1464277   | ERR118384   | GCA 900018265.1 | PDS000069303.1 |
| PDT000791321.2 | SAMEA70281418  | SAMEA70281418  | ERR2525321  | GCA 903810565.1 | PDS000069303.1 |
| PDT000116474.2 | SAMEA1464291   | SAMEA1464291   | ERR118385   | GCA 900039055.1 | PDS000069304.1 |
| PDT000791304.2 | SAMEA70270168  | SAMEA70270168  | ERR2525306  | GCA 903810435.1 | PDS000069304.1 |
| PDT000132902.2 | SAMEA2384732   | SAMEA2384732   | ERR554654   | GCA 900082405.1 | PDS000069290.1 |
| PDT000132949.2 | SAMEA2384740   | SAMEA2384740   | ERR554662   | GCA 900082415.1 | PDS000069290.1 |
| PDT000791295.2 | SAMEA70266418  | SAMEA70266418  | ERR2525301  | GCA 903810365.1 | PDS000069305.1 |
| PDT000791303.2 | SAMEA70269418  | SAMEA70269418  | ERR2525305  | GCA 903810405.1 | PDS000069305.1 |
| PDT000791265.2 | SAMEA70244668  | SAMEA70244668  | ERR2525272  | GCA 903810075.1 | PDS000069307.1 |
| PDT000791287.2 | SAMEA70260418  | SAMEA70260418  | ERR2525293  | GCA 903810285.1 | PDS000069307.1 |
| PDT000132749.2 | SAMEA2384605   | SAMEA2384605   | ERR554527   | GCA 900082295.1 | PDS000069301.1 |
| PDT000132947.2 | SAMEA2384620   | SAMEA2384620   | ERR554542   | GCA 900082285.1 | PDS000069301.1 |
| PDT000772694.2 | SAMEA103891571 | SAMEA103891571 | ERR2533800  | GCA 903813315.1 | PDS000069446.1 |
| PDT000772696.2 | SAMEA103891573 | SAMEA103891573 | ERR2533802  | GCA 903813335.1 | PDS000069446.1 |
| PDT000772510.2 | SAMEA103891384 | SAMEA103891384 | ERR2533615  | GCA 903801165.1 | PDS000069455.1 |
| PDT000772508.2 | SAMEA103891382 | SAMEA103891382 | ERR2533613  | GCA 903801135.1 | PDS000069457.1 |
| PDT000083756.2 | SAMEA2236429   | SAMEA2236429   | ERR422882   | GCA 001288965.1 | PDS000069452.1 |
| PDT000772608.2 | SAMEA103891484 | SAMEA103891484 | ERR2533714  | GCA 903802435.1 | PDS000069452.1 |
| PDT000772618.2 | SAMEA103891494 | SAMEA103891494 | ERR2533724  | GCA 903802535.1 | PDS000069451.1 |
| PDT000772622.2 | SAMEA103891498 | SAMEA103891498 | ERR2533728  | GCA 903802575.1 | PDS000069451.1 |
| PDT000772546.2 | SAMEA103891421 | SAMEA103891421 | ERR2533651  | GCA 903801745.1 | PDS000069453.1 |
| PDT000772550.2 | SAMEA103891425 | SAMEA103891425 | ERR2533655  | GCA 903801795.1 | PDS000069453.1 |
| PDT000772685.2 | SAMEA103891562 | SAMEA103891562 | ERR2533791  | GCA 903813225.1 | PDS000069448.1 |
| PDT000772686.2 | SAMEA103891563 | SAMEA103891563 | ERR2533792  | GCA 903813235.1 | PDS000069448.1 |
| PDT000132670.2 | SAMEA2383937   | SAMEA2383937   | ERR554146   | GCA 900081325.1 | PDS000069456.1 |

|                |                |                |             |                 |                |
|----------------|----------------|----------------|-------------|-----------------|----------------|
| PDT000132838.2 | SAMEA2384335   | SAMEA2384335   | ERR554259   | GCA 900081495.1 | PDS000069456.1 |
| PDT000772693.2 | SAMEA103891570 | SAMEA103891570 | ERR2533799  | GCA 903813305.1 | PDS000069447.1 |
| PDT000772695.2 | SAMEA103891572 | SAMEA103891572 | ERR2533801  | GCA 903813325.1 | PDS000069447.1 |
| PDT000766335.2 | SAMN14906855   | SAMN14906855   | SRR11787451 | GCA 013339285.1 | PDS000069589.1 |
| PDT000813695.1 | SAMN12776138   | SAMN12776138   | SRR10179305 | GCA 009458265.1 | PDS000069589.1 |
| PDT000070719.2 | SAMN03197922   | SAMN03197922   | SRR1656154  | GCA 001066025.1 | PDS000069593.1 |
| PDT000070769.2 | SAMN03197919   | SAMN03197919   | SRR1656151  | GCA 001067055.1 | PDS000069593.1 |
| PDT000070757.2 | SAMN03197872   | SAMN03197872   | SRR1656104  | GCA 001066815.1 | PDS000069587.1 |
| PDT000070821.2 | SAMN03198174   | SAMN03198174   | SRR1656406  | GCA 001068235.1 | PDS000069587.1 |
| PDT000070760.2 | SAMN03197878   | SAMN03197878   | SRR1656110  | GCA 001066875.1 | PDS000069594.1 |
| PDT000070761.2 | SAMN03197897   | SAMN03197897   | SRR1656129  | GCA 001066905.1 | PDS000069594.1 |
| PDT000070733.2 | SAMN03198024   | SAMN03198024   | SRR1656256  | GCA 001066355.1 | PDS000069588.1 |
| PDT000070787.2 | SAMN03198028   | SAMN03198028   | SRR1656260  | GCA 001067445.1 | PDS000069588.1 |
| PDT000070780.2 | SAMN03197990   | SAMN03197990   | SRR1656222  | GCA 001067295.1 | PDS000069592.1 |
| PDT000070789.2 | SAMN03198047   | SAMN03198047   | SRR1656279  | GCA 001067505.1 | PDS000069592.1 |
| PDT000132667.2 | SAMEA2383905   | SAMEA2383905   | ERR554114   | GCA 900081245.1 | PDS000069590.1 |
| PDT000132717.2 | SAMEA2384406   | SAMEA2384406   | ERR554329   | GCA 900081715.1 | PDS000069590.1 |
| PDT000686774.2 | SAMN12251185   | SAMN12251185   | SRR10905474 | GCA 010602785.1 | PDS000069792.1 |
| PDT000686777.2 | SAMN12251184   | SAMN12251184   | SRR10905475 | GCA 010602835.1 | PDS000069792.1 |
| PDT000670002.2 | SAMEA958839    | SAMEA958839    | ERR033075   | GCA 902713935.1 | PDS000069808.1 |
| PDT000670144.2 | SAMEA1029511   | SAMEA1029511   | ERR064949   | GCA 902715415.1 | PDS000069808.1 |
| PDT000670136.2 | SAMEA1029535   | SAMEA1029535   | ERR064951   | GCA 902715325.1 | PDS000069809.1 |
| PDT000670143.2 | SAMEA1029522   | SAMEA1029522   | ERR064950   | GCA 902715345.1 | PDS000069809.1 |
| PDT000115848.2 | SAMEA1469613   | SAMEA1469613   | ERR158744   | GCA 900041215.1 | PDS000069801.1 |
| PDT000119003.2 | SAMEA1317469   | SAMEA1317469   | ERR111046   | GCA 900046145.1 | PDS000069801.1 |
| PDT000822233.1 | SAMEA2725006   | SAMEA2725006   | ERR375864   | GCA 015543485.1 | PDS000070383.1 |
| PDT000822235.1 | SAMEA2724991   | SAMEA2724991   | ERR375866   | GCA 015543435.1 | PDS000070373.1 |
| PDT000822334.1 | SAMEA3484392   | SAMEA3484392   | ERR961616   | GCA 015543275.1 | PDS000070377.1 |
| PDT000108709.1 | SAMN03359438   | SAMN03359438   | SRR1814625  | GCA 015616765.1 | PDS000070020.1 |
| PDT000108781.1 | SAMN03359510   | SAMN03359510   | SRR1814697  | GCA 015613845.1 | PDS000070020.1 |
| PDT000108601.1 | SAMN03359329   | SAMN03359329   | SRR1814516  | GCA 015618705.1 | PDS000070019.1 |
| PDT000108785.1 | SAMN03359514   | SAMN03359514   | SRR1814701  | GCA 015615465.1 | PDS000070019.1 |
| PDT000108733.1 | SAMN03359462   | SAMN03359462   | SRR1814649  | GCA 015615045.1 | PDS000070016.1 |
| PDT000108796.1 | SAMN03359525   | SAMN03359525   | SRR1814712  | GCA 015616115.1 | PDS000070016.1 |
| PDT000618920.1 | SAMN12768945   | SAMN12768945   | SRR10126983 | GCA 015599685.1 | PDS000074420.1 |
| PDT000871115.1 | SAMN15541317   | SAMN15541317   | SRR12233368 | GCA 015541885.1 | PDS000074420.1 |
| PDT000871155.1 | SAMN15541380   | SAMN15541380   | SRR12233408 | GCA 015541305.1 | PDS000074497.1 |
| PDT000871183.1 | SAMN15541355   | SAMN15541355   | SRR12233436 | GCA 015540925.1 | PDS000074497.1 |
| PDT000871166.1 | SAMN15541370   | SAMN15541370   | SRR12233419 | GCA 015541135.1 | PDS000074498.1 |
| PDT000871198.1 | SAMN15541341   | SAMN15541341   | SRR12233451 | GCA 015541645.1 | PDS000074498.1 |
| PDT000852672.1 | SAMN12642260   | SAMN12642260   | SRR11016300 | GCA 014831815.1 | PDS000072910.1 |
| PDT000852764.1 | SAMN12642166   | SAMN12642166   | SRR11016295 | GCA 014836035.1 | PDS000072910.1 |
| PDT000852681.1 | SAMN12642250   | SAMN12642250   | SRR11016259 | GCA 014831985.1 | PDS000072911.1 |
| PDT000852766.1 | SAMN12642163   | SAMN12642163   | SRR11016276 | GCA 014836065.1 | PDS000072911.1 |
| PDT000871172.1 | SAMN15541365   | SAMN15541365   | SRR12233425 | GCA 015541045.1 | PDS000074413.1 |
| PDT000871191.1 | SAMN15541347   | SAMN15541347   | SRR12233444 | GCA 015541825.1 | PDS000074413.1 |
| PDT000852667.1 | SAMN12642264   | SAMN12642264   | SRR11016296 | GCA 014831725.1 | PDS000072909.1 |
| PDT000852725.1 | SAMN12642202   | SAMN12642202   | SRR11016199 | GCA 014832935.1 | PDS000072909.1 |
| PDT000852753.1 | SAMN12642177   | SAMN12642177   | SRR11016226 | GCA 014835815.1 | PDS000072912.1 |
| PDT000852754.1 | SAMN12642176   | SAMN12642176   | SRR11016280 | GCA 014835825.1 | PDS000072912.1 |
| PDT000083718.2 | SAMEA2384630   | SAMEA2384630   | ERR554552   | GCA 001288185.1 | PDS000067983.3 |
| PDT000083739.2 | SAMEA2236462   | SAMEA2236462   | ERR423008   | GCA 001288625.1 | PDS000067983.3 |
| PDT000083745.2 | SAMEA2384880   | SAMEA2384880   | ERR554802   | GCA 001288745.1 | PDS000067983.3 |
| PDT000083754.2 | SAMEA2384808   | SAMEA2384808   | ERR554730   | GCA 001288925.1 | PDS000067983.3 |
| PDT000083765.2 | SAMEA2384563   | SAMEA2384563   | ERR554485   | GCA 001289145.1 | PDS000067983.3 |
| PDT000083777.2 | SAMEA2384660   | SAMEA2384660   | ERR554582   | GCA 001289385.1 | PDS000067983.3 |
| PDT000083797.2 | SAMEA2384824   | SAMEA2384824   | ERR554746   | GCA 001289785.1 | PDS000067983.3 |
| PDT000083814.2 | SAMEA2384446   | SAMEA2384446   | ERR554369   | GCA 001290125.1 | PDS000067983.3 |
| PDT000083821.2 | SAMEA2236481   | SAMEA2236481   | ERR422934   | GCA 001290265.1 | PDS000067983.3 |
| PDT000083826.2 | SAMEA2384854   | SAMEA2384854   | ERR554776   | GCA 001290365.1 | PDS000067983.3 |
| PDT000083829.2 | SAMEA2384825   | SAMEA2384825   | ERR554747   | GCA 001290425.1 | PDS000067983.3 |
| PDT000112310.2 | SAMEA1464426   | SAMEA1464426   | ERR129281   | GCA 900035915.1 | PDS000067983.3 |
| PDT000204179.2 | SAMN05860146   | SAMN05860146   | SRR13238631 | GCA 002088995.1 | PDS000067983.3 |
| PDT000408045.2 | SAMN09847868   | SAMN09847868   | SRR7706353  | GCA 003719935.1 | PDS000067983.3 |
| PDT000582635.2 | SAMN11157689   | SAMN11157689   | SRR10020191 | GCA 008244705.1 | PDS000067983.3 |
| PDT000582636.2 | SAMN11157607   | SAMN11157607   | SRR10020194 | GCA 008244725.1 | PDS000067983.3 |
| PDT000582637.2 | SAMN11157690   | SAMN11157690   | SRR10020189 | GCA 008244745.1 | PDS000067983.3 |
| PDT000772512.2 | SAMEA103891386 | SAMEA103891386 | ERR2533617  | GCA 903801275.1 | PDS000067983.3 |

|                 |                |                |             |                 |                |
|-----------------|----------------|----------------|-------------|-----------------|----------------|
| PDT000772518.2  | SAMEA103891392 | SAMEA103891392 | ERR2533623  | GCA 903801375.1 | PDS000067983.3 |
| PDT000772528.2  | SAMEA103891402 | SAMEA103891402 | ERR2533633  | GCA 903801485.1 | PDS000067983.3 |
| PDT000772552.2  | SAMEA103891427 | SAMEA103891427 | ERR2533657  | GCA 903801785.1 | PDS000067983.3 |
| PDT000772565.2  | SAMEA103891440 | SAMEA103891440 | ERR2533670  | GCA 903801985.1 | PDS000067983.3 |
| PDT000772566.2  | SAMEA103891441 | SAMEA103891441 | ERR2533671  | GCA 903801995.1 | PDS000067983.3 |
| PDT000772568.2  | SAMEA103891443 | SAMEA103891443 | ERR2533673  | GCA 903802025.1 | PDS000067983.3 |
| PDT000772570.2  | SAMEA103891445 | SAMEA103891445 | ERR2533675  | GCA 903802035.1 | PDS000067983.3 |
| PDT000772581.2  | SAMEA103891456 | SAMEA103891456 | ERR2533686  | GCA 903802185.1 | PDS000067983.3 |
| PDT000772582.2  | SAMEA103891457 | SAMEA103891457 | ERR2533687  | GCA 903802175.1 | PDS000067983.3 |
| PDT000772640.2  | SAMEA103891517 | SAMEA103891517 | ERR2533746  | GCA 903802775.1 | PDS000067983.3 |
| PDT000772651.2  | SAMEA103891528 | SAMEA103891528 | ERR2533757  | GCA 903802865.1 | PDS000067983.3 |
| PDT000772652.2  | SAMEA103891529 | SAMEA103891529 | ERR2533758  | GCA 903802875.1 | PDS000067983.3 |
| PDT000782290.2  | SAMEA4008655   | SAMEA4008655   | ERR1715358  | GCA 903800565.1 | PDS000067983.3 |
| PDT000790242.2  | SAMEA4008697   | SAMEA4008697   | ERR1715399  | GCA 903801215.1 | PDS000067983.3 |
| PDT000790249.2  | SAMEA4008703   | SAMEA4008703   | ERR1715405  | GCA 903801325.1 | PDS000067983.3 |
| PDT000790264.2  | SAMEA4008717   | SAMEA4008717   | ERR1715419  | GCA 903801905.1 | PDS000067983.3 |
| PDT000790269.2  | SAMEA4008722   | SAMEA4008722   | ERR1715424  | GCA 903803015.1 | PDS000067983.3 |
| PDT000852669.1  | SAMN12642262   | SAMN12642262   | SRR11016298 | GCA 014831785.1 | PDS000067983.3 |
| PDT0008080187.2 | SAMEA734677    | SAMEA734677    | ERR017169   | GCA 001227885.1 | PDS000069405.1 |
| PDT00080203.2   | SAMEA1030246   | SAMEA1030246   | ERR044589   | GCA 001228345.1 | PDS000069405.1 |
| PDT00080240.2   | SAMEA1030192   | SAMEA1030192   | ERR044586   | GCA 001229705.1 | PDS000069405.1 |
| PDT00080411.2   | SAMEA1030264   | SAMEA1030264   | ERR045065   | GCA 001236005.1 | PDS000069405.1 |
| PDT000112074.2  | SAMEA1317305   | SAMEA1317305   | ERR111072   | GCA 900041095.1 | PDS000069405.1 |
| PDT000112109.2  | SAMEA1469587   | SAMEA1469587   | ERR158667   | GCA 900018175.1 | PDS000069405.1 |
| PDT000112256.2  | SAMEA1317585   | SAMEA1317585   | ERR107810   | GCA 900045505.1 | PDS000069405.1 |
| PDT000115498.2  | SAMEA1464197   | SAMEA1464197   | ERR118609   | GCA 900048455.1 | PDS000069405.1 |
| PDT000115774.2  | SAMEA1464256   | SAMEA1464256   | ERR118336   | GCA 900017545.1 | PDS000069405.1 |
| PDT000115946.2  | SAMEA1464514   | SAMEA1464514   | ERR118337   | GCA 900049785.1 | PDS000069405.1 |
| PDT000116040.2  | SAMEA1317465   | SAMEA1317465   | ERR107852   | GCA 900038485.1 | PDS000069405.1 |
| PDT000116163.2  | SAMEA1464584   | SAMEA1464584   | ERR118561   | GCA 900045105.1 | PDS000069405.1 |
| PDT000116373.2  | SAMEA1469584   | SAMEA1469584   | ERR158666   | GCA 900018165.1 | PDS000069405.1 |
| PDT000116532.2  | SAMEA1464559   | SAMEA1464559   | ERR118584   | GCA 900025005.1 | PDS000069405.1 |
| PDT000116678.2  | SAMEA1317334   | SAMEA1317334   | ERR107910   | GCA 900048525.1 | PDS000069405.1 |
| PDT000117538.2  | SAMEA1317356   | SAMEA1317356   | ERR107822   | GCA 900045525.1 | PDS000069405.1 |
| PDT000117576.2  | SAMEA1469575   | SAMEA1469575   | ERR158664   | GCA 900018155.1 | PDS000069405.1 |
| PDT000117647.2  | SAMEA1464407   | SAMEA1464407   | ERR124441   | GCA 900040865.1 | PDS000069405.1 |
| PDT000117792.2  | SAMEA1317486   | SAMEA1317486   | ERR107832   | GCA 900046835.1 | PDS000069405.1 |
| PDT000117904.2  | SAMEA1317342   | SAMEA1317342   | ERR111037   | GCA 900046115.1 | PDS000069405.1 |
| PDT000118040.2  | SAMEA1464567   | SAMEA1464567   | ERR118552   | GCA 900052675.1 | PDS000069405.1 |
| PDT000118049.2  | SAMEA1317357   | SAMEA1317357   | ERR111039   | GCA 900037595.1 | PDS000069405.1 |
| PDT000118130.2  | SAMEA1464373   | SAMEA1464373   | ERR118435   | GCA 900039835.1 | PDS000069405.1 |
| PDT000118204.2  | SAMEA1464301   | SAMEA1464301   | ERR118546   | GCA 900037675.1 | PDS000069405.1 |
| PDT000118309.2  | SAMEA1317314   | SAMEA1317314   | ERR111073   | GCA 900031655.1 | PDS000069405.1 |
| PDT000119039.2  | SAMEA1469720   | SAMEA1469720   | ERR158734   | GCA 900055955.1 | PDS000069405.1 |
| PDT000119189.2  | SAMEA1464424   | SAMEA1464424   | ERR118436   | GCA 900048785.1 | PDS000069405.1 |
| PDT000119241.2  | SAMEA1464295   | SAMEA1464295   | ERR129261   | GCA 900047295.1 | PDS000069405.1 |
| PDT000119339.2  | SAMEA1464284   | SAMEA1464284   | ERR118370   | GCA 900037845.1 | PDS000069405.1 |
| PDT000343039.2  | SAMEA1531668   | SAMEA1531668   | ERR223161   | GCA 900484495.1 | PDS000069405.1 |
| PDT000343110.2  | SAMEA1469879   | SAMEA1469879   | ERR159063   | GCA 900483505.1 | PDS000069405.1 |
| PDT000343180.2  | SAMEA1531687   | SAMEA1531687   | ERR177166   | GCA 900483585.1 | PDS000069405.1 |
| PDT000343216.2  | SAMEA1531733   | SAMEA1531733   | ERR177191   | GCA 900483795.1 | PDS000069405.1 |
| PDT000790271.2  | SAMEA4008724   | SAMEA4008724   | ERR1715426  | GCA 903803045.1 | PDS000069405.1 |
| PDT000790272.2  | SAMEA4008725   | SAMEA4008725   | ERR1715427  | GCA 903803055.1 | PDS000069405.1 |
| PDT000790273.2  | SAMEA4008727   | SAMEA4008727   | ERR1715429  | GCA 903803075.1 | PDS000069405.1 |
| PDT000790274.2  | SAMEA4008728   | SAMEA4008728   | ERR1715430  | GCA 903803085.1 | PDS000069405.1 |
| PDT000790275.2  | SAMEA4008729   | SAMEA4008729   | ERR1715431  | GCA 903803105.1 | PDS000069405.1 |
| PDT000790279.2  | SAMEA4008732   | SAMEA4008732   | ERR1715434  | GCA 903803125.1 | PDS000069405.1 |
| PDT000790300.2  | SAMEA4008754   | SAMEA4008754   | ERR1715455  | GCA 903803335.1 | PDS000069405.1 |
| PDT000790301.2  | SAMEA4008755   | SAMEA4008755   | ERR1715456  | GCA 903803345.1 | PDS000069405.1 |
| PDT000790304.2  | SAMEA4008758   | SAMEA4008758   | ERR1715459  | GCA 903803395.1 | PDS000069405.1 |
| PDT000790305.2  | SAMEA4008759   | SAMEA4008759   | ERR1715460  | GCA 903803385.1 | PDS000069405.1 |
| PDT000790306.2  | SAMEA4008760   | SAMEA4008760   | ERR1715461  | GCA 903803375.1 | PDS000069405.1 |
| PDT000790311.2  | SAMEA4008765   | SAMEA4008765   | ERR1715466  | GCA 903803435.1 | PDS000069405.1 |
| PDT000790312.2  | SAMEA4008767   | SAMEA4008767   | ERR1715468  | GCA 903803455.1 | PDS000069405.1 |
| PDT000790314.2  | SAMEA4008770   | SAMEA4008770   | ERR1715470  | GCA 903803475.1 | PDS000069405.1 |
| PDT000790317.2  | SAMEA4008773   | SAMEA4008773   | ERR1715473  | GCA 903803505.1 | PDS000069405.1 |
| PDT000790319.2  | SAMEA4008775   | SAMEA4008775   | ERR1715475  | GCA 903803525.1 | PDS000069405.1 |
| PDT000790320.2  | SAMEA4008776   | SAMEA4008776   | ERR1715476  | GCA 903803535.1 | PDS000069405.1 |

|                |              |              |            |                 |                |
|----------------|--------------|--------------|------------|-----------------|----------------|
| PDT000790323.2 | SAMEA4008779 | SAMEA4008779 | ERR1715479 | GCA 903803565.1 | PDS000069405.1 |
| PDT000790342.2 | SAMEA4008798 | SAMEA4008798 | ERR1715498 | GCA 903803755.1 | PDS000069405.1 |
| PDT000790343.2 | SAMEA4008799 | SAMEA4008799 | ERR1715499 | GCA 903803765.1 | PDS000069405.1 |
| PDT000790344.2 | SAMEA4008800 | SAMEA4008800 | ERR1715500 | GCA 903803775.1 | PDS000069405.1 |
| PDT000790347.2 | SAMEA4008803 | SAMEA4008803 | ERR1715503 | GCA 903803805.1 | PDS000069405.1 |
| PDT000790348.2 | SAMEA4008804 | SAMEA4008804 | ERR1715504 | GCA 903803815.1 | PDS000069405.1 |
| PDT000790349.2 | SAMEA4008805 | SAMEA4008805 | ERR1715505 | GCA 903803845.1 | PDS000069405.1 |
| PDT000790360.2 | SAMEA4552933 | SAMEA4552933 | ERR3012663 | GCA 903803955.1 | PDS000069405.1 |
| PDT000790364.2 | SAMEA4552938 | SAMEA4552938 | ERR3012667 | GCA 903803975.1 | PDS000069405.1 |
| PDT000790366.2 | SAMEA4552941 | SAMEA4552941 | ERR3012669 | GCA 903804005.1 | PDS000069405.1 |
| PDT000790368.2 | SAMEA4552943 | SAMEA4552943 | ERR3012671 | GCA 903804025.1 | PDS000069405.1 |
| PDT000790372.2 | SAMEA4552948 | SAMEA4552948 | ERR3012675 | GCA 903804065.1 | PDS000069405.1 |
| PDT000790373.2 | SAMEA4552949 | SAMEA4552949 | ERR3012676 | GCA 903804075.1 | PDS000069405.1 |
| PDT000790376.2 | SAMEA4552952 | SAMEA4552952 | ERR3012679 | GCA 903804105.1 | PDS000069405.1 |
| PDT000790377.2 | SAMEA4552953 | SAMEA4552953 | ERR3012680 | GCA 903804115.1 | PDS000069405.1 |
| PDT000790379.2 | SAMEA4552955 | SAMEA4552955 | ERR3012682 | GCA 903804135.1 | PDS000069405.1 |
| PDT000790383.2 | SAMEA4552960 | SAMEA4552960 | ERR3012686 | GCA 903804175.1 | PDS000069405.1 |
| PDT000790385.2 | SAMEA4552961 | SAMEA4552961 | ERR3012687 | GCA 903804185.1 | PDS000069405.1 |
| PDT000790388.2 | SAMEA4552963 | SAMEA4552963 | ERR3012689 | GCA 903804215.1 | PDS000069405.1 |
| PDT000790815.2 | SAMEA4553163 | SAMEA4553163 | ERR1891892 | GCA 903806125.1 | PDS000069405.1 |
| PDT000790831.2 | SAMEA4553168 | SAMEA4553168 | ERR1891896 | GCA 903806155.1 | PDS000069405.1 |
| PDT000790846.2 | SAMEA4553172 | SAMEA4553172 | ERR1891900 | GCA 903806205.1 | PDS000069405.1 |
| PDT000790851.2 | SAMEA4553173 | SAMEA4553173 | ERR1891901 | GCA 903806215.1 | PDS000069405.1 |
| PDT000790855.2 | SAMEA4553174 | SAMEA4553174 | ERR1891902 | GCA 903806225.1 | PDS000069405.1 |
| PDT000790863.2 | SAMEA4553176 | SAMEA4553176 | ERR1891904 | GCA 903806245.1 | PDS000069405.1 |
| PDT000790867.2 | SAMEA4553177 | SAMEA4553177 | ERR1891905 | GCA 903806255.1 | PDS000069405.1 |
| PDT000790871.2 | SAMEA4553178 | SAMEA4553178 | ERR1891906 | GCA 903806265.1 | PDS000069405.1 |
| PDT000790880.2 | SAMEA4553180 | SAMEA4553180 | ERR1891908 | GCA 903806285.1 | PDS000069405.1 |
| PDT000790885.2 | SAMEA4553182 | SAMEA4553182 | ERR1891910 | GCA 903806305.1 | PDS000069405.1 |
| PDT000790894.2 | SAMEA4553185 | SAMEA4553185 | ERR1891913 | GCA 903806325.1 | PDS000069405.1 |
| PDT000790902.2 | SAMEA4553190 | SAMEA4553190 | ERR1891918 | GCA 903806395.1 | PDS000069405.1 |
| PDT000790903.2 | SAMEA4553191 | SAMEA4553191 | ERR1891919 | GCA 903806405.1 | PDS000069405.1 |
| PDT000790904.2 | SAMEA4553192 | SAMEA4553192 | ERR1891920 | GCA 903806415.1 | PDS000069405.1 |
| PDT000790908.2 | SAMEA4553197 | SAMEA4553197 | ERR1891925 | GCA 903806475.1 | PDS000069405.1 |
| PDT000790909.2 | SAMEA4553198 | SAMEA4553198 | ERR1891926 | GCA 903806455.1 | PDS000069405.1 |
| PDT000790916.2 | SAMEA4553205 | SAMEA4553205 | ERR1891933 | GCA 903806545.1 | PDS000069405.1 |
| PDT000790918.2 | SAMEA4553207 | SAMEA4553207 | ERR1891935 | GCA 903806535.1 | PDS000069405.1 |
| PDT000790919.2 | SAMEA4553208 | SAMEA4553208 | ERR1891936 | GCA 903806575.1 | PDS000069405.1 |
| PDT000791450.2 | SAMEA6377380 | SAMEA6377380 | ERR3721996 | GCA 903932605.1 | PDS000069294.1 |
| PDT000791451.2 | SAMEA6377381 | SAMEA6377381 | ERR3721997 | GCA 903932595.1 | PDS000069294.1 |
| PDT000080359.2 | SAMEA734674  | SAMEA734674  | ERR017174  | GCA 001234365.1 | PDS000067939.1 |
| PDT000080378.2 | SAMEA734680  | SAMEA734680  | ERR017172  | GCA 001234985.1 | PDS000067939.1 |
| PDT000108565.1 | SAMN0335923  | SAMN0335923  | SRR1814480 | GCA 015619265.1 | PDS000067773.1 |
| PDT000108569.1 | SAMN0335927  | SAMN0335927  | SRR1814484 | GCA 015619505.1 | PDS000067773.1 |
| PDT000108570.1 | SAMN0335928  | SAMN0335928  | SRR1814485 | GCA 015619645.1 | PDS000067773.1 |
| PDT000108571.1 | SAMN0335929  | SAMN0335929  | SRR1814486 | GCA 015619125.1 | PDS000067773.1 |
| PDT000108572.1 | SAMN0335930  | SAMN0335930  | SRR1814487 | GCA 015619105.1 | PDS000067773.1 |
| PDT000108582.1 | SAMN03359310 | SAMN03359310 | SRR1814497 | GCA 015618845.1 | PDS000067773.1 |
| PDT000108583.1 | SAMN03359311 | SAMN03359311 | SRR1814498 | GCA 015618785.1 | PDS000067773.1 |
| PDT000108587.1 | SAMN03359315 | SAMN03359315 | SRR1814502 | GCA 015618865.1 | PDS000067773.1 |
| PDT000108607.1 | SAMN03359335 | SAMN03359335 | SRR1814522 | GCA 015618575.1 | PDS000067773.1 |
| PDT000108608.1 | SAMN03359336 | SAMN03359336 | SRR1814523 | GCA 015618645.1 | PDS000067773.1 |
| PDT000108656.1 | SAMN03359384 | SAMN03359384 | SRR1814571 | GCA 015617585.1 | PDS000067773.1 |
| PDT000108663.1 | SAMN03359391 | SAMN03359391 | SRR1814578 | GCA 015618045.1 | PDS000067773.1 |
| PDT000108673.1 | SAMN03359401 | SAMN03359401 | SRR1814588 | GCA 015617985.1 | PDS000067773.1 |
| PDT000108674.1 | SAMN03359402 | SAMN03359402 | SRR1814589 | GCA 015616945.1 | PDS000067773.1 |
| PDT000108679.1 | SAMN03359407 | SAMN03359407 | SRR1814594 | GCA 015618005.1 | PDS000067773.1 |
| PDT000108687.1 | SAMN03359416 | SAMN03359416 | SRR1814603 | GCA 015617925.1 | PDS000067773.1 |
| PDT000108688.1 | SAMN03359417 | SAMN03359417 | SRR1814604 | GCA 015617105.1 | PDS000067773.1 |
| PDT000108689.1 | SAMN03359418 | SAMN03359418 | SRR1814605 | GCA 015617155.1 | PDS000067773.1 |
| PDT000108690.1 | SAMN03359419 | SAMN03359419 | SRR1814606 | GCA 015617065.1 | PDS000067773.1 |
| PDT000108692.1 | SAMN03359421 | SAMN03359421 | SRR1814608 | GCA 015618085.1 | PDS000067773.1 |
| PDT000108696.1 | SAMN03359425 | SAMN03359425 | SRR1814612 | GCA 015616405.1 | PDS000067773.1 |
| PDT000108698.1 | SAMN03359427 | SAMN03359427 | SRR1814614 | GCA 015616265.1 | PDS000067773.1 |
| PDT000108726.1 | SAMN03359455 | SAMN03359455 | SRR1814642 | GCA 015616345.1 | PDS000067773.1 |
| PDT000108742.1 | SAMN03359471 | SAMN03359471 | SRR1814658 | GCA 015614445.1 | PDS000067773.1 |
| PDT000108743.1 | SAMN03359472 | SAMN03359472 | SRR1814659 | GCA 015614525.1 | PDS000067773.1 |
| PDT000108746.1 | SAMN03359475 | SAMN03359475 | SRR1814662 | GCA 015614665.1 | PDS000067773.1 |

|                |               |               |             |                 |                |
|----------------|---------------|---------------|-------------|-----------------|----------------|
| PDT000108747.1 | SAMN03359476  | SAMN03359476  | SRR1814663  | GCA 015614745.1 | PDS000067773.1 |
| PDT000108748.1 | SAMN03359477  | SAMN03359477  | SRR1814664  | GCA 015614905.1 | PDS000067773.1 |
| PDT000108756.1 | SAMN03359485  | SAMN03359485  | SRR1814672  | GCA 015614245.1 | PDS000067773.1 |
| PDT000108757.1 | SAMN03359486  | SAMN03359486  | SRR1814673  | GCA 015614365.1 | PDS000067773.1 |
| PDT000108758.1 | SAMN03359487  | SAMN03359487  | SRR1814674  | GCA 015614425.1 | PDS000067773.1 |
| PDT000766263.2 | SAMN14906927  | SAMN14906927  | SRR11787436 | GCA 013337835.1 | PDS000068460.1 |
| PDT000813653.1 | SAMN12776181  | SAMN12776181  | SRR10179085 | GCA 009457425.1 | PDS000068460.1 |
| PDT000383749.2 | SAMN09989506  | SAMN09989506  | SRR7825594  | GCA 003581515.1 | PDS000069761.1 |
| PDT000383842.2 | SAMN09989508  | SAMN09989508  | SRR7825592  | GCA 003583815.1 | PDS000069761.1 |
| PDT000115633.2 | SAMEA1317366  | SAMEA1317366  | ERR107876   | GCA 900048505.1 | PDS000069756.1 |
| PDT000117503.2 | SAMEA1317565  | SAMEA1317565  | ERR111042   | GCA 900053475.1 | PDS000069756.1 |
| PDT000117522.2 | SAMEA1464462  | SAMEA1464462  | ERR118582   | GCA 900038855.1 | PDS000069756.1 |
| PDT000119213.2 | SAMEA1469608  | SAMEA1469608  | ERR158742   | GCA 900042655.1 | PDS000069756.1 |
| PDT000119214.2 | SAMEA1464568  | SAMEA1464568  | ERR118583   | GCA 900045695.1 | PDS000069756.1 |
| PDT000115834.2 | SAMEA1317320  | SAMEA1317320  | ERR107973   | GCA 900019185.1 | PDS000069701.1 |
| PDT000116696.2 | SAMEA1469664  | SAMEA1469664  | ERR158727   | GCA 900042625.1 | PDS000069701.1 |
| PDT000117978.2 | SAMEA1464710  | SAMEA1464710  | ERR118426   | GCA 900046005.1 | PDS000069701.1 |
| PDT000119424.2 | SAMEA1317470  | SAMEA1317470  | ERR107974   | GCA 900064545.1 | PDS000069701.1 |
| PDT000119490.2 | SAMEA1464438  | SAMEA1464438  | ERR129289   | GCA 900040405.1 | PDS000069701.1 |
| PDT000079146.2 | SAMEA1466502  | SAMEA1466502  | ERR302833   | GCA 001198415.1 | PDS000068615.1 |
| PDT000079830.2 | SAMEA1466510  | SAMEA1466510  | ERR137996   | GCA 001212765.1 | PDS000068615.1 |
| PDT000081033.2 | SAMEA1324735  | SAMEA1324735  | ERR134617   | GCA 001262255.1 | PDS000068615.1 |
| PDT000090548.2 | SAMEA1466517  | SAMEA1466517  | ERR302831   | GCA 001354055.1 | PDS000068615.1 |
| PDT000090542.2 | SAMEA1466507  | SAMEA1466507  | ERR137927   | GCA 001353935.1 | PDS000068637.1 |
| PDT000090544.2 | SAMEA1466512  | SAMEA1466512  | ERR137925   | GCA 001353975.1 | PDS000068637.1 |
| PDT000090546.2 | SAMEA1466515  | SAMEA1466515  | ERR302762   | GCA 001354015.1 | PDS000068637.1 |
| PDT000090556.2 | SAMEA1466535  | SAMEA1466535  | ERR137931   | GCA 001354215.1 | PDS000068637.1 |
| PDT000079229.2 | SAMEA1324637  | SAMEA1324637  | ERR134833   | GCA 001200155.1 | PDS000068593.1 |
| PDT000090444.2 | SAMEA1324565  | SAMEA1324565  | ERR134653   | GCA 001351975.1 | PDS000068593.1 |
| PDT000090451.2 | SAMEA1324582  | SAMEA1324582  | ERR134834   | GCA 001352115.1 | PDS000068593.1 |
| PDT000090562.2 | SAMEA1710089  | SAMEA1710089  | ERR256875   | GCA 001354335.1 | PDS000068593.1 |
| PDT000079380.2 | SAMEA1324514  | SAMEA1324514  | ERR134788   | GCA 001203315.1 | PDS000069256.1 |
| PDT000079398.2 | SAMEA1324526  | SAMEA1324526  | ERR134787   | GCA 001203695.1 | PDS000069256.1 |
| PDT000079774.2 | SAMEA1324585  | SAMEA1324585  | ERR302838   | GCA 001211625.1 | PDS000069256.1 |
| PDT000090440.2 | SAMEA1324558  | SAMEA1324558  | ERR134643   | GCA 001351895.1 | PDS000069256.1 |
| PDT000078872.2 | SAMEA1324516  | SAMEA1324516  | ERR134627   | GCA 001192675.1 | PDS000069292.1 |
| PDT000079001.2 | SAMEA1324537  | SAMEA1324537  | ERR134628   | GCA 001195345.1 | PDS000069292.1 |
| PDT000079712.2 | SAMEA1324629  | SAMEA1324629  | ERR134629   | GCA 001210285.1 | PDS000069292.1 |
| PDT000090502.2 | SAMEA1324740  | SAMEA1324740  | ERR134639   | GCA 001353135.1 | PDS000069292.1 |
| PDT000079711.2 | SAMEA1466528  | SAMEA1466528  | ERR137972   | GCA 001210265.1 | PDS000069237.1 |
| PDT000079807.2 | SAMEA1466538  | SAMEA1466538  | ERR137973   | GCA 001212305.1 | PDS000069237.1 |
| PDT000090535.2 | SAMEA1466493  | SAMEA1466493  | ERR137969   | GCA 001353795.1 | PDS000069237.1 |
| PDT000090537.2 | SAMEA1466498  | SAMEA1466498  | ERR137968   | GCA 001353835.1 | PDS000069237.1 |
| PDT000078970.2 | SAMEA1324581  | SAMEA1324581  | ERR134737   | GCA 001194705.1 | PDS000069248.1 |
| PDT000079569.2 | SAMEA1710097  | SAMEA1710097  | ERR249328   | GCA 001207315.1 | PDS000069248.1 |
| PDT000090430.2 | SAMEA1324534  | SAMEA1324534  | ERR134762   | GCA 001351695.1 | PDS000069248.1 |
| PDT000090441.2 | SAMEA1324559  | SAMEA1324559  | ERR134738   | GCA 001351915.1 | PDS000069248.1 |
| PDT000078961.2 | SAMEA1710102  | SAMEA1710102  | ERR249309   | GCA 001194525.1 | PDS000069264.1 |
| PDT000079240.2 | SAMEA1324561  | SAMEA1324561  | ERR134616   | GCA 001200375.1 | PDS000069264.1 |
| PDT000079779.2 | SAMEA1466501  | SAMEA1466501  | ERR302834   | GCA 001211745.1 | PDS000069264.1 |
| PDT000079811.2 | SAMEA1710099  | SAMEA1710099  | ERR249310   | GCA 001212385.1 | PDS000069264.1 |
| PDT000079731.2 | SAMEA1710078  | SAMEA1710078  | ERR256877   | GCA 001210685.1 | PDS000069236.1 |
| PDT000079776.2 | SAMEA1324685  | SAMEA1324685  | ERR134846   | GCA 001211665.1 | PDS000069236.1 |
| PDT000090478.2 | SAMEA1324672  | SAMEA1324672  | ERR134845   | GCA 001352655.1 | PDS000069236.1 |
| PDT000090481.2 | SAMEA1324683  | SAMEA1324683  | ERR134847   | GCA 001352715.1 | PDS000069236.1 |
| PDT000079064.2 | SAMEA1463309  | SAMEA1463309  | ERR302717   | GCA 001196655.1 | PDS000069274.1 |
| PDT000079613.2 | SAMEA1708901  | SAMEA1708901  | ERR237633   | GCA 001208245.1 | PDS000069274.1 |
| PDT000090345.2 | SAMEA1463433  | SAMEA1463433  | ERR302715   | GCA 001349535.1 | PDS000069274.1 |
| PDT000090347.2 | SAMEA1463445  | SAMEA1463445  | ERR144829   | GCA 001349575.1 | PDS000069274.1 |
| PDT000791335.2 | SAMEA70291918 | SAMEA70291918 | ERR2525335  | GCA 903810705.1 | PDS000069300.1 |
| PDT000791337.2 | SAMEA70293418 | SAMEA70293418 | ERR2525337  | GCA 903810725.1 | PDS000069300.1 |
| PDT000791339.2 | SAMEA70294918 | SAMEA70294918 | ERR2525339  | GCA 903810735.1 | PDS000069300.1 |
| PDT000791342.2 | SAMEA70297168 | SAMEA70297168 | ERR2525342  | GCA 903810785.1 | PDS000069300.1 |
| PDT000791271.2 | SAMEA70249168 | SAMEA70249168 | ERR2525278  | GCA 903810115.1 | PDS000069308.1 |
| PDT000791286.2 | SAMEA70259668 | SAMEA70259668 | ERR2525292  | GCA 903810275.1 | PDS000069308.1 |
| PDT000791289.2 | SAMEA70261918 | SAMEA70261918 | ERR2525295  | GCA 903810305.1 | PDS000069308.1 |
| PDT000791290.2 | SAMEA70262668 | SAMEA70262668 | ERR2525296  | GCA 903810315.1 | PDS000069308.1 |
| PDT000686745.2 | SAMN12251172  | SAMN12251172  | SRR10905584 | GCA 010599375.1 | PDS000069917.1 |



|                |                |                |             |                 |                |
|----------------|----------------|----------------|-------------|-----------------|----------------|
| PDT000686757.2 | SAMN12251157   | SAMN12251157   | SRR10905824 | GCA 010599595.1 | PDS000069917.1 |
| PDT000812717.1 | SAMN10038912   | SAMN10038912   | SRR7839387  | GCA 015571255.1 | PDS000069917.1 |
| PDT000812852.1 | SAMN10038936   | SAMN10038936   | SRR7839819  | GCA 015569495.1 | PDS000069917.1 |
| PDT000112240.2 | SAMEA1469722   | SAMEA1469722   | ERR158774   | GCA 900048295.1 | PDS000069834.1 |
| PDT000116647.2 | SAMEA1464320   | SAMEA1464320   | ERR118468   | GCA 900039925.1 | PDS000069834.1 |
| PDT000118777.2 | SAMEA1464625   | SAMEA1464625   | ERR118467   | GCA 900039915.1 | PDS000069834.1 |
| PDT000118942.2 | SAMEA1464297   | SAMEA1464297   | ERR223139   | GCA 900040775.1 | PDS000069834.1 |
| PDT000118422.2 | SAMEA1464506   | SAMEA1464506   | ERR118602   | GCA 900038315.1 | PDS000069823.1 |
| PDT000118696.2 | SAMEA1469688   | SAMEA1469688   | ERR158696   | GCA 900041785.1 | PDS000069823.1 |
| PDT000118996.2 | SAMEA1317392   | SAMEA1317392   | ERR111068   | GCA 900046215.1 | PDS000069823.1 |
| PDT000119520.2 | SAMEA1464531   | SAMEA1464531   | ERR118456   | GCA 900039205.1 | PDS000069823.1 |
| PDT000184745.1 | SAMEA24682168  | SAMEA24682168  | ERR1753403  | GCA 015612365.1 | PDS000068087.1 |
| PDT000184746.1 | SAMEA24682918  | SAMEA24682918  | ERR1753404  | GCA 015612325.1 | PDS000068087.1 |
| PDT000184747.1 | SAMEA24683668  | SAMEA24683668  | ERR1753405  | GCA 015612345.1 | PDS000068087.1 |
| PDT000112173.2 | SAMEA1317426   | SAMEA1317426   | ERR107948   | GCA 900020335.1 | PDS000068094.1 |
| PDT000115821.2 | SAMEA1317344   | SAMEA1317344   | ERR107842   | GCA 900038725.1 | PDS000068094.1 |
| PDT000116933.2 | SAMEA1464241   | SAMEA1464241   | ERR134372   | GCA 900017715.1 | PDS000068094.1 |
| PDT000184738.1 | SAMEA24676918  | SAMEA24676918  | ERR1753396  | GCA 015611585.1 | PDS000068088.1 |
| PDT000184739.1 | SAMEA24677668  | SAMEA24677668  | ERR1753397  | GCA 015612105.1 | PDS000068088.1 |
| PDT000184740.1 | SAMEA24678418  | SAMEA24678418  | ERR1753398  | GCA 015611415.1 | PDS000068088.1 |
| PDT000184752.1 | SAMEA24687418  | SAMEA24687418  | ERR1753410  | GCA 015612825.1 | PDS000068084.1 |
| PDT000184753.1 | SAMEA24688168  | SAMEA24688168  | ERR1753411  | GCA 015612245.1 | PDS000068084.1 |
| PDT000184754.1 | SAMEA24688918  | SAMEA24688918  | ERR1753412  | GCA 015612205.1 | PDS000068084.1 |
| PDT000184766.1 | SAMEA24697918  | SAMEA24697918  | ERR1753424  | GCA 015611955.1 | PDS000068079.1 |
| PDT000184767.1 | SAMEA24698668  | SAMEA24698668  | ERR1753425  | GCA 015611845.1 | PDS000068079.1 |
| PDT000184768.1 | SAMEA24699418  | SAMEA24699418  | ERR1753426  | GCA 015612715.1 | PDS000068079.1 |
| PDT000184717.1 | SAMEA24661168  | SAMEA24661168  | ERR1753375  | GCA 015612645.1 | PDS000068097.1 |
| PDT000184771.1 | SAMEA24701668  | SAMEA24701668  | ERR1753429  | GCA 015611865.1 | PDS000068078.1 |
| PDT000184772.1 | SAMEA24702418  | SAMEA24702418  | ERR1753430  | GCA 015611825.1 | PDS000068078.1 |
| PDT000184773.1 | SAMEA24703168  | SAMEA24703168  | ERR1753431  | GCA 015611785.1 | PDS000068078.1 |
| PDT000184789.1 | SAMEA24715168  | SAMEA24715168  | ERR1753447  | GCA 015611405.1 | PDS000068070.1 |
| PDT000184790.1 | SAMEA24715918  | SAMEA24715918  | ERR1753448  | GCA 015612925.1 | PDS000068070.1 |
| PDT000184791.1 | SAMEA24716668  | SAMEA24716668  | ERR1753449  | GCA 015611325.1 | PDS000068070.1 |
| PDT000184782.1 | SAMEA24709918  | SAMEA24709918  | ERR1753440  | GCA 015611605.1 | PDS000068074.1 |
| PDT000184783.1 | SAMEA24710668  | SAMEA24710668  | ERR1753441  | GCA 015611505.1 | PDS000068074.1 |
| PDT000184784.1 | SAMEA24711418  | SAMEA24711418  | ERR1753442  | GCA 015612745.1 | PDS000068074.1 |
| PDT000313595.2 | SAMN07291558   | SAMN07291558   | SRR6985703  | GCA 003073655.1 | PDS000068844.1 |
| PDT000331087.2 | SAMN07291561   | SAMN07291561   | SRR6985708  | GCA 003203615.1 | PDS000068844.1 |
| PDT000772490.2 | SAMEA103891364 | SAMEA103891364 | ERR2533595  | GCA 903800805.1 | PDS000068844.1 |
| PDT000079694.2 | SAMEA1324509   | SAMEA1324509   | ERR134674   | GCA 001209925.1 | PDS000068826.1 |
| PDT000079736.2 | SAMEA1324722   | SAMEA1324722   | ERR134667   | GCA 001210785.1 | PDS000068826.1 |
| PDT000090467.2 | SAMEA1324638   | SAMEA1324638   | ERR134675   | GCA 001352435.1 | PDS000068826.1 |
| PDT000069552.2 | SAMEA1324689   | SAMEA1324689   | ERR134781   | GCA 001047875.1 | PDS000068815.1 |
| PDT000090428.2 | SAMEA1324524   | SAMEA1324524   | ERR134840   | GCA 001351655.1 | PDS000068815.1 |
| PDT000090470.2 | SAMEA1324646   | SAMEA1324646   | ERR134796   | GCA 001352495.1 | PDS000068815.1 |
| PDT000343065.2 | SAMEA1466874   | SAMEA1466874   | ERR156455   | GCA 900482525.1 | PDS000068811.1 |
| PDT000343107.2 | SAMEA1469872   | SAMEA1469872   | ERR159020   | GCA 900483105.1 | PDS000068811.1 |
| PDT000343126.2 | SAMEA1469898   | SAMEA1469898   | ERR159033   | GCA 900483425.1 | PDS000068811.1 |
| PDT000343063.2 | SAMEA1466869   | SAMEA1466869   | ERR156469   | GCA 900482705.1 | PDS000068813.1 |
| PDT000343162.2 | SAMEA1531666   | SAMEA1531666   | ERR177163   | GCA 900483605.1 | PDS000068813.1 |
| PDT000343203.2 | SAMEA1531714   | SAMEA1531714   | ERR177169   | GCA 900483765.1 | PDS000068813.1 |
| PDT000343064.2 | SAMEA1466870   | SAMEA1466870   | ERR156459   | GCA 900482755.1 | PDS000068812.1 |
| PDT000343105.2 | SAMEA1469869   | SAMEA1469869   | ERR159068   | GCA 900483435.1 | PDS000068812.1 |
| PDT000343154.2 | SAMEA1469931   | SAMEA1469931   | ERR159067   | GCA 900483475.1 | PDS000068812.1 |
| PDT000355167.2 | SAMN07291567   | SAMN07291567   | SRR6985717  | GCA 003330905.1 | PDS000069669.1 |
| PDT000108728.1 | SAMN03359457   | SAMN03359457   | SRR1814644  | GCA 015616365.1 | PDS000067766.1 |
| PDT000108718.1 | SAMN03359447   | SAMN03359447   | SRR1814634  | GCA 015616605.1 | PDS000067768.1 |
| PDT000108680.1 | SAMN03359409   | SAMN03359409   | SRR1814596  | GCA 015618065.1 | PDS000067767.1 |
| PDT000108724.1 | SAMN03359453   | SAMN03359453   | SRR1814640  | GCA 015616425.1 | PDS000067767.1 |
| PDT000108715.1 | SAMN03359444   | SAMN03359444   | SRR1814631  | GCA 015616645.1 | PDS000067769.1 |
| PDT000108797.1 | SAMN03359526   | SAMN03359526   | SRR1814713  | GCA 015616145.1 | PDS000067769.1 |
| PDT000108669.1 | SAMN03359397   | SAMN03359397   | SRR1814584  | GCA 015618145.1 | PDS000067764.1 |
| PDT000108739.1 | SAMN03359468   | SAMN03359468   | SRR1814655  | GCA 015615005.1 | PDS000067764.1 |
| PDT000117638.2 | SAMEA1469701   | SAMEA1469701   | ERR158672   | GCA 900018185.1 | PDS000067761.1 |
| PDT000118166.2 | SAMEA1317532   | SAMEA1317532   | ERR111041   | GCA 900046125.1 | PDS000067761.1 |
| PDT000166652.2 | SAMEA2445549   | SAMEA2445549   | ERR573252   | GCA 900083165.1 | PDS000067760.1 |
| PDT000166658.2 | SAMEA2445616   | SAMEA2445616   | ERR573319   | GCA 900083325.1 | PDS000067760.1 |
| PDT000170707.2 | SAMEA3449007   | SAMEA3449007   | ERR1069860  | GCA 900124875.1 | PDS000067759.1 |

|                |               |               |             |                 |                |
|----------------|---------------|---------------|-------------|-----------------|----------------|
| PDT000171145.2 | SAMEA3449038  | SAMEA3449038  | ERR1069891  | GCA 900127765.1 | PDS000067759.1 |
| PDT000811749.1 | SAMEA4387458  | SAMEA4387458  | ERR1789319  | GCA 015573655.1 | PDS000067890.1 |
| PDT000811832.1 | SAMEA4387306  | SAMEA4387306  | ERR1795520  | GCA 015573075.1 | PDS000067890.1 |
| PDT000811397.1 | SAMEA4387085  | SAMEA4387085  | ERR1788967  | GCA 015581795.1 | PDS000067896.1 |
| PDT000811830.1 | SAMEA4387305  | SAMEA4387305  | ERR1795518  | GCA 015573155.1 | PDS000067896.1 |
| PDT000811509.1 | SAMEA4387523  | SAMEA4387523  | ERR1789079  | GCA 015579995.1 | PDS000067885.1 |
| PDT000811735.1 | SAMEA4387687  | SAMEA4387687  | ERR1789305  | GCA 015575055.1 | PDS000067885.1 |
| PDT000811487.1 | SAMEA4387132  | SAMEA4387132  | ERR1789057  | GCA 015579495.1 | PDS000067889.1 |
| PDT000811753.1 | SAMEA4387459  | SAMEA4387459  | ERR1789323  | GCA 015574135.1 | PDS000067889.1 |
| PDT000811372.1 | SAMEA4387362  | SAMEA4387362  | ERR1788942  | GCA 015582015.1 | PDS000067895.1 |
| PDT000811600.1 | SAMEA4387189  | SAMEA4387189  | ERR1789170  | GCA 015578435.1 | PDS000067895.1 |
| PDT000811847.1 | SAMEA4387737  | SAMEA4387737  | ERR1795535  | GCA 015572835.1 | PDS000067884.1 |
| PDT000811867.1 | SAMEA4387568  | SAMEA4387568  | ERR1795555  | GCA 015572295.1 | PDS000067887.1 |
| PDT000811436.1 | SAMEA4387379  | SAMEA4387379  | ERR1789006  | GCA 015580935.1 | PDS000067893.1 |
| PDT000811595.1 | SAMEA4387419  | SAMEA4387419  | ERR1789165  | GCA 015577335.1 | PDS000067893.1 |
| PDT000811743.1 | SAMEA4387628  | SAMEA4387628  | ERR1789313  | GCA 015575175.1 | PDS000067886.1 |
| PDT000811775.1 | SAMEA4387630  | SAMEA4387630  | ERR1789345  | GCA 015575335.1 | PDS000067886.1 |
| PDT000184758.1 | SAMEA24691918 | SAMEA24691918 | ERR1753416  | GCA 015612115.1 | PDS000068081.1 |
| PDT000184759.1 | SAMEA24692668 | SAMEA24692668 | ERR1753417  | GCA 015612705.1 | PDS000068081.1 |
| PDT000184733.1 | SAMEA24673168 | SAMEA24673168 | ERR1753391  | GCA 015612145.1 | PDS000068090.1 |
| PDT000184735.1 | SAMEA24674668 | SAMEA24674668 | ERR1753393  | GCA 015612885.1 | PDS000068089.1 |
| PDT000184736.1 | SAMEA24675418 | SAMEA24675418 | ERR1753394  | GCA 015611525.1 | PDS000068089.1 |
| PDT000184755.1 | SAMEA24689668 | SAMEA24689668 | ERR1753413  | GCA 015612185.1 | PDS000068083.1 |
| PDT000184756.1 | SAMEA24690418 | SAMEA24690418 | ERR1753414  | GCA 015612155.1 | PDS000068083.1 |
| PDT000184730.1 | SAMEA24670918 | SAMEA24670918 | ERR1753388  | GCA 015612425.1 | PDS000068091.1 |
| PDT000184774.1 | SAMEA24703918 | SAMEA24703918 | ERR1753432  | GCA 015611765.1 | PDS000068077.1 |
| PDT000184775.1 | SAMEA24704668 | SAMEA24704668 | ERR1753433  | GCA 015611745.1 | PDS000068077.1 |
| PDT000184761.1 | SAMEA24694168 | SAMEA24694168 | ERR1753419  | GCA 015612055.1 | PDS000068080.1 |
| PDT000184762.1 | SAMEA24694918 | SAMEA24694918 | ERR1753420  | GCA 015612845.1 | PDS000068080.1 |
| PDT000184750.1 | SAMEA24685918 | SAMEA24685918 | ERR1753408  | GCA 015612265.1 | PDS000068086.1 |
| PDT000184751.1 | SAMEA24686668 | SAMEA24686668 | ERR1753409  | GCA 015612225.1 | PDS000068086.1 |
| PDT000115931.2 | SAMEA1317541  | SAMEA1317541  | ERR107940   | GCA 900037765.1 | PDS000068171.1 |
| PDT000116454.2 | SAMEA1464354  | SAMEA1464354  | ERR129255   | GCA 900022585.1 | PDS000068171.1 |
| PDT000116518.2 | SAMEA1469607  | SAMEA1469607  | ERR158716   | GCA 900050635.1 | PDS000068160.1 |
| PDT000119510.2 | SAMEA1469557  | SAMEA1469557  | ERR158717   | GCA 900042565.1 | PDS000068160.1 |
| PDT000115617.2 | SAMEA1464422  | SAMEA1464422  | ERR118545   | GCA 900038715.1 | PDS000068349.1 |
| PDT000116362.2 | SAMEA1464393  | SAMEA1464393  | ERR118541   | GCA 900019085.1 | PDS000068349.1 |
| PDT000115576.2 | SAMEA1469576  | SAMEA1469576  | ERR158700   | GCA 900065335.1 | PDS000068360.1 |
| PDT000115852.2 | SAMEA1469649  | SAMEA1469649  | ERR158699   | GCA 900039755.1 | PDS000068360.1 |
| PDT000238839.2 | SAMN03893375  | SAMN03893375  | SRR5909194  | GCA 002274625.1 | PDS000068490.1 |
| PDT000811825.1 | SAMEA4387477  | SAMEA4387477  | ERR1789395  | GCA 015573255.1 | PDS000068495.1 |
| PDT000078893.2 | SAMEA1466482  | SAMEA1466482  | ERR137935   | GCA 001193115.1 | PDS000068671.1 |
| PDT000090519.2 | SAMEA1466455  | SAMEA1466455  | ERR302777   | GCA 001353475.1 | PDS000068671.1 |
| PDT000371200.2 | SAMD00083449  | SAMD00083449  | DRR107089   | GCA 003417305.1 | PDS000068675.1 |
| PDT000371295.2 | SAMD00083532  | SAMD00083532  | DRR107172   | GCA 003420205.1 | PDS000068675.1 |
| PDT000371293.2 | SAMD00083530  | SAMD00083530  | DRR107170   | GCA 003420165.1 | PDS000068677.1 |
| PDT000371417.2 | SAMD00083652  | SAMD00083652  | DRR107292   | GCA 003422705.1 | PDS000068677.1 |
| PDT000371316.2 | SAMD00083553  | SAMD00083553  | DRR107193   | GCA 003420625.1 | PDS000068669.1 |
| PDT000371410.2 | SAMD00083645  | SAMD00083645  | DRR107285   | GCA 003422565.1 | PDS000068669.1 |
| PDT000371306.2 | SAMD00083543  | SAMD00083543  | DRR107183   | GCA 003420425.1 | PDS000068670.1 |
| PDT000371443.2 | SAMD00083678  | SAMD00083678  | DRR107318   | GCA 003423605.1 | PDS000068670.1 |
| PDT000371301.2 | SAMD00083538  | SAMD00083538  | DRR107178   | GCA 003420325.1 | PDS000068674.1 |
| PDT000371432.2 | SAMD00083667  | SAMD00083667  | DRR107307   | GCA 003423005.1 | PDS000068674.1 |
| PDT000371227.2 | SAMD00083468  | SAMD00083468  | DRR107108   | GCA 003418185.1 | PDS000068667.1 |
| PDT000371339.2 | SAMD00083573  | SAMD00083573  | DRR107213   | GCA 003421125.1 | PDS000068667.1 |
| PDT000371294.2 | SAMD00083531  | SAMD00083531  | DRR107171   | GCA 003420185.1 | PDS000068676.1 |
| PDT000371418.2 | SAMD00083653  | SAMD00083653  | DRR107293   | GCA 003422725.1 | PDS000068676.1 |
| PDT000371304.2 | SAMD00083541  | SAMD00083541  | DRR107181   | GCA 003420385.1 | PDS000068673.1 |
| PDT000371436.2 | SAMD00083671  | SAMD00083671  | DRR107311   | GCA 003423465.1 | PDS000068673.1 |
| PDT000813783.1 | SAMN12776050  | SAMN12776050  | SRR10179187 | GCA 009460035.1 | PDS000068761.1 |
| PDT000813793.1 | SAMN12776040  | SAMN12776040  | SRR10179198 | GCA 009460215.1 | PDS000068761.1 |
| PDT000078894.2 | SAMEA1324677  | SAMEA1324677  | ERR134801   | GCA 001193135.1 | PDS000068760.1 |
| PDT000090493.2 | SAMEA1324723  | SAMEA1324723  | ERR134791   | GCA 001352955.1 | PDS000068760.1 |
| PDT000090427.2 | SAMEA1324519  | SAMEA1324519  | ERR134763   | GCA 001351635.1 | PDS000068748.1 |
| PDT000090498.2 | SAMEA1324731  | SAMEA1324731  | ERR134742   | GCA 001353055.1 | PDS000068748.1 |
| PDT000164715.2 | SAMEA2298737  | SAMEA2298737  | ERR505375   | GCA 900097945.1 | PDS000068759.1 |
| PDT000165016.2 | SAMEA2298727  | SAMEA2298727  | ERR490599   | GCA 900098645.1 | PDS000068759.1 |
| PDT000766287.2 | SAMN14906901  | SAMN14906901  | SRR11787419 | GCA 013338325.1 | PDS000068910.1 |

|                |              |              |             |                 |                |
|----------------|--------------|--------------|-------------|-----------------|----------------|
| PDT000813682.1 | SAMN12776151 | SAMN12776151 | SRR10179291 | GCA 009458015.1 | PDS000068910.1 |
| PDT000066787.3 | SAMN03255469 | SAMN03255469 | SRR1955832  | GCA 001018975.2 | PDS000068907.1 |
| PDT000079759.2 | SAMEA1324647 | SAMEA1324647 | ERR134811   | GCA 001211325.1 | PDS000068905.1 |
| PDT000090448.2 | SAMEA1324572 | SAMEA1324572 | ERR134806   | GCA 001352055.1 | PDS000068905.1 |
| PDT000079749.2 | SAMEA1710113 | SAMEA1710113 | ERR256882   | GCA 001211065.1 | PDS000069232.1 |
| PDT000090550.2 | SAMEA1466521 | SAMEA1466521 | ERR302750   | GCA 001354095.1 | PDS000069232.1 |
| PDT000079757.2 | SAMEA1324614 | SAMEA1324614 | ERR134696   | GCA 001211265.1 | PDS000069231.1 |
| PDT000090476.2 | SAMEA1324667 | SAMEA1324667 | ERR134702   | GCA 001352615.1 | PDS000069231.1 |
| PDT000078877.2 | SAMEA1466532 | SAMEA1466532 | ERR137954   | GCA 001192775.1 | PDS000069241.1 |
| PDT000079656.2 | SAMEA1466492 | SAMEA1466492 | ERR137948   | GCA 001209165.1 | PDS000069241.1 |
| PDT000078900.2 | SAMEA1324713 | SAMEA1324713 | ERR134619   | GCA 001193255.1 | PDS000069239.1 |
| PDT000079685.2 | SAMEA1324716 | SAMEA1324716 | ERR134618   | GCA 001209745.1 | PDS000069239.1 |
| PDT000079743.2 | SAMEA1324598 | SAMEA1324598 | ERR134854   | GCA 001210945.1 | PDS000069233.1 |
| PDT000079745.2 | SAMEA1324612 | SAMEA1324612 | ERR134853   | GCA 001210985.1 | PDS000069233.1 |
| PDT000078948.2 | SAMEA1466539 | SAMEA1466539 | ERR302778   | GCA 001194245.1 | PDS000069247.1 |
| PDT000079594.2 | SAMEA1466523 | SAMEA1466523 | ERR137943   | GCA 001207845.1 | PDS000069247.1 |
| PDT000170617.2 | SAMEA3448896 | SAMEA3448896 | ERR1069983  | GCA 900125855.1 | PDS000069245.1 |
| PDT000171175.2 | SAMEA3448904 | SAMEA3448904 | ERR1069991  | GCA 900127985.1 | PDS000069245.1 |
| PDT000132959.2 | SAMEA2384384 | SAMEA2384384 | ERR554307   | GCA 900081655.1 | PDS000069246.1 |
| PDT000166666.2 | SAMEA2445614 | SAMEA2445614 | ERR573317   | GCA 900083315.1 | PDS000069246.1 |
| PDT000090353.2 | SAMEA1463459 | SAMEA1463459 | ERR302738   | GCA 001349695.1 | PDS000069380.1 |
| PDT000790661.2 | SAMEA4553111 | SAMEA4553111 | ERR1891842  | GCA 903805665.1 | PDS000069380.1 |
| PDT000132708.2 | SAMEA2384865 | SAMEA2384865 | ERR554787   | GCA 900082885.1 | PDS000069379.1 |
| PDT000132909.2 | SAMEA2384849 | SAMEA2384849 | ERR554771   | GCA 900082755.1 | PDS000069379.1 |
| PDT000790634.2 | SAMEA4553083 | SAMEA4553083 | ERR1891814  | GCA 903805395.1 | PDS000069382.1 |
| PDT000790652.2 | SAMEA4553102 | SAMEA4553102 | ERR1891833  | GCA 903805575.1 | PDS000069382.1 |
| PDT000790712.2 | SAMEA4553129 | SAMEA4553129 | ERR1891860  | GCA 903805845.1 | PDS000069373.1 |
| PDT000790725.2 | SAMEA4553136 | SAMEA4553136 | ERR1891865  | GCA 903805875.1 | PDS000069373.1 |
| PDT000790734.2 | SAMEA4553139 | SAMEA4553139 | ERR1891868  | GCA 903805905.1 | PDS000069372.1 |
| PDT000790772.2 | SAMEA4553149 | SAMEA4553149 | ERR1891878  | GCA 903806005.1 | PDS000069372.1 |
| PDT000790647.2 | SAMEA4553096 | SAMEA4553096 | ERR1891827  | GCA 903805525.1 | PDS000069381.1 |
| PDT000790657.2 | SAMEA4553107 | SAMEA4553107 | ERR1891838  | GCA 903805625.1 | PDS000069381.1 |
| PDT000790651.2 | SAMEA4553101 | SAMEA4553101 | ERR1891832  | GCA 903805565.1 | PDS000069384.1 |
| PDT000790653.2 | SAMEA4553103 | SAMEA4553103 | ERR1891834  | GCA 903805595.1 | PDS000069384.1 |
| PDT000790714.2 | SAMEA4553131 | SAMEA4553131 | ERR1891862  | GCA 903805855.1 | PDS000069374.1 |
| PDT000790719.2 | SAMEA4553134 | SAMEA4553134 | ERR1891863  | GCA 903805865.1 | PDS000069374.1 |
| PDT000790681.2 | SAMEA4553119 | SAMEA4553119 | ERR1891850  | GCA 903805755.1 | PDS000069377.1 |
| PDT000790686.2 | SAMEA4553120 | SAMEA4553120 | ERR1891851  | GCA 903805745.1 | PDS000069377.1 |
| PDT000766352.2 | SAMN14906835 | SAMN14906835 | SRR11787464 | GCA 013339605.1 | PDS000069510.1 |
| PDT000813729.1 | SAMN12776104 | SAMN12776104 | SRR10179126 | GCA 009458955.1 | PDS000069510.1 |
| PDT000766353.2 | SAMN14906836 | SAMN14906836 | SRR11787453 | GCA 013339645.1 | PDS000069509.1 |
| PDT000813981.1 | SAMN12775852 | SAMN12775852 | SRR10179083 | GCA 009463995.1 | PDS000069509.1 |
| PDT000766350.2 | SAMN14906837 | SAMN14906837 | SRR11787412 | GCA 013339585.1 | PDS000069511.1 |
| PDT000813811.1 | SAMN12776022 | SAMN12776022 | SRR10179217 | GCA 009460585.1 | PDS000069511.1 |
| PDT000766354.2 | SAMN14906834 | SAMN14906834 | SRR11787465 | GCA 013339665.1 | PDS000069508.1 |
| PDT000813870.1 | SAMN12775961 | SAMN12775961 | SRR10178941 | GCA 009461775.1 | PDS000069508.1 |
| PDT000766348.2 | SAMN14906842 | SAMN14906842 | SRR11787389 | GCA 013339545.1 | PDS000069514.1 |
| PDT000813799.1 | SAMN12776034 | SAMN12776034 | SRR10179204 | GCA 009460355.1 | PDS000069514.1 |
| PDT000050130.2 | SAMN03219994 | SAMN03219994 | SRR1790319  | GCA 000877915.1 | PDS000069507.1 |
| PDT000132805.2 | SAMEA2384887 | SAMEA2384887 | ERR554809   | GCA 900083045.1 | PDS000069501.1 |
| PDT000132821.2 | SAMEA2384668 | SAMEA2384668 | ERR554590   | GCA 900082345.1 | PDS000069501.1 |
| PDT000070495.2 | SAMN03197051 | SAMN03197051 | SRR1655283  | GCA 001060995.1 | PDS000069608.1 |
| PDT000070538.2 | SAMN03197058 | SAMN03197058 | SRR1655290  | GCA 001061955.1 | PDS000069608.1 |
| PDT000132693.2 | SAMEA2384375 | SAMEA2384375 | ERR554298   | GCA 900081635.1 | PDS000069612.1 |
| PDT000132859.2 | SAMEA2383874 | SAMEA2383874 | ERR554084   | GCA 900081205.1 | PDS000069612.1 |
| PDT000118664.2 | SAMEA1317394 | SAMEA1317394 | ERR111087   | GCA 900046245.1 | PDS000069767.1 |
| PDT000119110.2 | SAMEA1568641 | SAMEA1568641 | ERR211894   | GCA 900048095.1 | PDS000069767.1 |
| PDT000812741.1 | SAMN10038768 | SAMN10038768 | SRR7839455  | GCA 015570875.1 | PDS000069940.1 |
| PDT000812754.1 | SAMN10038855 | SAMN10038855 | SRR7839504  | GCA 015570495.1 | PDS000069940.1 |
| PDT000812743.1 | SAMN10038770 | SAMN10038770 | SRR7839457  | GCA 015570775.1 | PDS000069938.1 |
| PDT000812915.1 | SAMN10038763 | SAMN10038763 | SRR7839988  | GCA 015567275.1 | PDS000069938.1 |
| PDT000812719.1 | SAMN10038776 | SAMN10038776 | SRR7839389  | GCA 015569635.1 | PDS000069937.1 |
| PDT000812867.1 | SAMN10038879 | SAMN10038879 | SRR7839881  | GCA 015568295.1 | PDS000069937.1 |
| PDT000812724.1 | SAMN10038897 | SAMN10038897 | SRR7839408  | GCA 015571015.1 | PDS000069935.1 |
| PDT000812842.1 | SAMN10038786 | SAMN10038786 | SRR7839758  | GCA 015568355.1 | PDS000069935.1 |
| PDT000812749.1 | SAMN10038731 | SAMN10038731 | SRR7839499  | GCA 015570695.1 | PDS000069941.1 |
| PDT000812808.1 | SAMN10038751 | SAMN10038751 | SRR7839698  | GCA 015568995.1 | PDS000069941.1 |
| PDT000812809.1 | SAMN10038748 | SAMN10038748 | SRR7839699  | GCA 015569035.1 | PDS000069943.1 |

|                |              |              |             |                 |                |
|----------------|--------------|--------------|-------------|-----------------|----------------|
| PDT000812890.1 | SAMN10038736 | SAMN10038736 | SRR7839934  | GCA 015567975.1 | PDS000069943.1 |
| PDT000812833.1 | SAMN10038785 | SAMN10038785 | SRR7839747  | GCA 015568695.1 | PDS000069936.1 |
| PDT000812968.1 | SAMN10038789 | SAMN10038789 | SRR7840131  | GCA 015566165.1 | PDS000069936.1 |
| PDT000112302.2 | SAMEA1464502 | SAMEA1464502 | ERR118442   | GCA 900039865.1 | PDS000069945.1 |
| PDT000118430.2 | SAMEA1317485 | SAMEA1317485 | ERR223141   | GCA 900041115.1 | PDS000069945.1 |
| PDT000805017.2 | SAMEA6125694 | SAMEA6125694 | ERR3623563  | GCA 903987985.1 | PDS000072812.1 |
| PDT000079029.2 | SAMEA1324654 | SAMEA1324654 | ERR134761   | GCA 001195925.1 | PDS000072907.1 |
| PDT000852774.1 | SAMN12642156 | SAMN12642156 | SRR11016307 | GCA 014836255.1 | PDS000072907.1 |
| PDT000852692.1 | SAMN12642238 | SAMN12642238 | SRR11016272 | GCA 014832265.1 | PDS000072908.1 |
| PDT000852757.1 | SAMN12642173 | SAMN12642173 | SRR11016284 | GCA 014835875.1 | PDS000072908.1 |
| PDT000852702.1 | SAMN12642229 | SAMN12642229 | SRR11016229 | GCA 014832455.1 | PDS000072903.1 |
| PDT000852703.1 | SAMN12642228 | SAMN12642228 | SRR11016230 | GCA 014832475.1 | PDS000072903.1 |
| PDT000852709.1 | SAMN12642223 | SAMN12642223 | SRR11016236 | GCA 014832555.1 | PDS000072901.1 |
| PDT000852721.1 | SAMN12642209 | SAMN12642209 | SRR11016251 | GCA 014832845.1 | PDS000072901.1 |
| PDT000852699.1 | SAMN12642234 | SAMN12642234 | SRR11016277 | GCA 014832375.1 | PDS000072904.1 |
| PDT000852707.1 | SAMN12642224 | SAMN12642224 | SRR11016235 | GCA 014832565.1 | PDS000072904.1 |
| PDT000852664.1 | SAMN12642266 | SAMN12642266 | SRR11016293 | GCA 014831705.1 | PDS000072906.1 |
| PDT000852712.1 | SAMN12642219 | SAMN12642219 | SRR11016240 | GCA 014832645.1 | PDS000072906.1 |
| PDT000904218.1 | SAMN10689430 | SAMN10689430 | SRR8389058  | GCA 015713515.1 | PDS000076915.1 |
| PDT000904219.1 | SAMN10689428 | SAMN10689428 | SRR8389056  | GCA 015713545.1 | PDS000076915.1 |
| PDT000904379.1 | SAMN09400946 | SAMN09400946 | SRR7297226  | GCA 015716925.1 | PDS000076919.1 |
| PDT000904382.1 | SAMN09400945 | SAMN09400945 | SRR7297227  | GCA 015716985.1 | PDS000076919.1 |
| PDT000904590.1 | SAMN11285061 | SAMN11285061 | SRR8810021  | GCA 015727335.1 | PDS000076920.1 |
| PDT000904677.1 | SAMN09401080 | SAMN09401080 | SRR7297428  | GCA 015729105.1 | PDS000076920.1 |
| PDT000904456.1 | SAMN13622094 | SAMN13622094 | SRR10728150 | GCA 015724595.1 | PDS000076918.1 |
| PDT000904570.1 | SAMN11285081 | SAMN11285081 | SRR8810381  | GCA 015726965.1 | PDS000076918.1 |
| PDT000904389.1 | SAMN09400940 | SAMN09400940 | SRR7297228  | GCA 015717125.1 | PDS000076922.1 |
| PDT000904656.1 | SAMN09401101 | SAMN09401101 | SRR7297360  | GCA 015728665.1 | PDS000076922.1 |
| PDT000904279.1 | SAMN09401051 | SAMN09401051 | SRR7297286  | GCA 015714925.1 | PDS000076910.1 |
| PDT000904603.1 | SAMN11285047 | SAMN11285047 | SRR8809975  | GCA 015727625.1 | PDS000076910.1 |
| PDT000904246.1 | SAMN10689392 | SAMN10689392 | SRR8389063  | GCA 015714075.1 | PDS000076913.1 |
| PDT000711840.2 | SAMN10875738 | SAMN10875738 | SRR11015934 | GCA 011319595.1 | PDS000076912.1 |
| PDT000904250.1 | SAMN10689384 | SAMN10689384 | SRR8389111  | GCA 015714165.1 | PDS000076912.1 |
| PDT000904254.1 | SAMN10689378 | SAMN10689378 | SRR8389114  | GCA 015714245.1 | PDS000076911.1 |
| PDT000904255.1 | SAMN10689377 | SAMN10689377 | SRR8389113  | GCA 015714255.1 | PDS000076911.1 |
| PDT000550296.2 | SAMN12056289 | SAMN12056289 | SRR12108442 | GCA 007556695.1 | PDS000069262.1 |
| PDT000670025.2 | SAMEA958963  | SAMEA958963  | ERR033828   | GCA 902714175.1 | PDS000069806.1 |
| PDT000670311.2 | SAMEA2079289 | SAMEA2079289 | ERR357929   | GCA 902717115.1 | PDS000069806.1 |
| PDT000670312.2 | SAMEA2079291 | SAMEA2079291 | ERR485441   | GCA 902717015.1 | PDS000069806.1 |
| PDT000670313.2 | SAMEA2079501 | SAMEA2079501 | ERR357946   | GCA 902717035.1 | PDS000069806.1 |
| PDT000670314.2 | SAMEA2079288 | SAMEA2079288 | ERR485437   | GCA 902717085.1 | PDS000069806.1 |
| PDT000670315.2 | SAMEA2079292 | SAMEA2079292 | ERR357934   | GCA 902717145.1 | PDS000069806.1 |
| PDT000670316.2 | SAMEA2081065 | SAMEA2081065 | ERR485439   | GCA 902717055.1 | PDS000069806.1 |
| PDT000670317.2 | SAMEA2081207 | SAMEA2081207 | ERR357945   | GCA 902717165.1 | PDS000069806.1 |
| PDT000670318.2 | SAMEA2079290 | SAMEA2079290 | ERR357931   | GCA 902717095.1 | PDS000069806.1 |
| PDT000670322.2 | SAMEA2079293 | SAMEA2079293 | ERR357935   | GCA 902717045.1 | PDS000069806.1 |
| PDT000670323.2 | SAMEA2081208 | SAMEA2081208 | ERR374557   | GCA 902717075.1 | PDS000069806.1 |
| PDT000670324.2 | SAMEA2079502 | SAMEA2079502 | ERR357947   | GCA 902717125.1 | PDS000069806.1 |
| PDT000670325.2 | SAMEA2081203 | SAMEA2081203 | ERR485442   | GCA 902717065.1 | PDS000069806.1 |
| PDT000670329.2 | SAMEA2079500 | SAMEA2079500 | ERR357944   | GCA 902717195.1 | PDS000069806.1 |
| PDT000670331.2 | SAMEA2079511 | SAMEA2079511 | ERR353061   | GCA 902717345.1 | PDS000069806.1 |
| PDT000670332.2 | SAMEA2079509 | SAMEA2079509 | ERR485184   | GCA 902717355.1 | PDS000069806.1 |
| PDT000670335.2 | SAMEA2081212 | SAMEA2081212 | ERR353059   | GCA 902717295.1 | PDS000069806.1 |
| PDT000670337.2 | SAMEA2079513 | SAMEA2079513 | ERR485190   | GCA 902717305.1 | PDS000069806.1 |
| PDT000670338.2 | SAMEA2081214 | SAMEA2081214 | ERR485191   | GCA 902717275.1 | PDS000069806.1 |
| PDT000670341.2 | SAMEA2079510 | SAMEA2079510 | ERR485186   | GCA 902717265.1 | PDS000069806.1 |
| PDT000670342.2 | SAMEA2079515 | SAMEA2079515 | ERR485193   | GCA 902717315.1 | PDS000069806.1 |
| PDT000670344.2 | SAMEA2079512 | SAMEA2079512 | ERR485189   | GCA 902717325.1 | PDS000069806.1 |
| PDT000670346.2 | SAMEA2079504 | SAMEA2079504 | ERR353049   | GCA 902717375.1 | PDS000069806.1 |
| PDT000670349.2 | SAMEA2081213 | SAMEA2081213 | ERR485188   | GCA 902717395.1 | PDS000069806.1 |
| PDT000670350.2 | SAMEA2081215 | SAMEA2081215 | ERR485194   | GCA 902717415.1 | PDS000069806.1 |
| PDT000670351.2 | SAMEA2079517 | SAMEA2079517 | ERR485196   | GCA 902717425.1 | PDS000069806.1 |
| PDT000670352.2 | SAMEA2079516 | SAMEA2079516 | ERR485195   | GCA 902717435.1 | PDS000069806.1 |
| PDT000670353.2 | SAMEA2079519 | SAMEA2079519 | ERR485199   | GCA 902717445.1 | PDS000069806.1 |
| PDT000670359.2 | SAMEA2081216 | SAMEA2081216 | ERR485197   | GCA 902717475.1 | PDS000069806.1 |
| PDT000670365.2 | SAMEA2079518 | SAMEA2079518 | ERR353072   | GCA 902717555.1 | PDS000069806.1 |
| PDT000681586.2 | SAMEA2081692 | SAMEA2081692 | ERR353197   | GCA 902720565.1 | PDS000069806.1 |
| PDT000681590.2 | SAMEA2077823 | SAMEA2077823 | ERR353199   | GCA 902720545.1 | PDS000069806.1 |

|                |               |               |            |                 |                |
|----------------|---------------|---------------|------------|-----------------|----------------|
| PDT000681602.2 | SAMEA2077822  | SAMEA2077822  | ERR353198  | GCA 902720655.1 | PDS000069806.1 |
| PDT000681753.2 | SAMEA1972016  | SAMEA1972016  | ERR517343  | GCA 902722245.1 | PDS000069806.1 |
| PDT000681756.2 | SAMEA2076495  | SAMEA2076495  | ERR353270  | GCA 902722195.1 | PDS000069806.1 |
| PDT000681765.2 | SAMEA2076497  | SAMEA2076497  | ERR353273  | GCA 902722185.1 | PDS000069806.1 |
| PDT000681766.2 | SAMEA2076496  | SAMEA2076496  | ERR517340  | GCA 902722175.1 | PDS000069806.1 |
| PDT000681778.2 | SAMEA1964774  | SAMEA1964774  | ERR517346  | GCA 902722425.1 | PDS000069806.1 |
| PDT000108735.1 | SAMN03359464  | SAMN03359464  | SRR1814651 | GCA 015614945.1 | PDS000069318.1 |
| PDT000108737.1 | SAMN03359466  | SAMN03359466  | SRR1814653 | GCA 015614925.1 | PDS000069318.1 |
| PDT000108755.1 | SAMN03359484  | SAMN03359484  | SRR1814671 | GCA 015614305.1 | PDS000069318.1 |
| PDT000108771.1 | SAMN03359500  | SAMN03359500  | SRR1814687 | GCA 015615675.1 | PDS000069318.1 |
| PDT000108795.1 | SAMN03359524  | SAMN03359524  | SRR1814711 | GCA 015616205.1 | PDS000069318.1 |
| PDT000791175.2 | SAMEA70165918 | SAMEA70165918 | ERR2525221 | GCA 903809565.1 | PDS000069318.1 |
| PDT000791176.2 | SAMEA70166668 | SAMEA70166668 | ERR2525222 | GCA 903809575.1 | PDS000069318.1 |
| PDT000791079.2 | SAMEA70091668 | SAMEA70091668 | ERR2506377 | GCA 903808215.1 | PDS000069192.1 |
| PDT000791080.2 | SAMEA70092418 | SAMEA70092418 | ERR2506378 | GCA 903808225.1 | PDS000069192.1 |
| PDT000791081.2 | SAMEA70093168 | SAMEA70093168 | ERR2506379 | GCA 903808235.1 | PDS000069192.1 |
| PDT000791113.2 | SAMEA70119418 | SAMEA70119418 | ERR2506411 | GCA 903808565.1 | PDS000069192.1 |
| PDT000791114.2 | SAMEA70120168 | SAMEA70120168 | ERR2506412 | GCA 903808555.1 | PDS000069192.1 |
| PDT000804949.2 | SAMEA6125837  | SAMEA6125837  | ERR3623771 | GCA 903987295.1 | PDS000069192.1 |
| PDT000804951.2 | SAMEA6125838  | SAMEA6125838  | ERR3623774 | GCA 903987355.1 | PDS000069192.1 |
| PDT000804959.2 | SAMEA6125839  | SAMEA6125839  | ERR3623772 | GCA 903987455.1 | PDS000069192.1 |
| PDT000804962.2 | SAMEA6125841  | SAMEA6125841  | ERR3623775 | GCA 903987475.1 | PDS000069192.1 |
| PDT000804977.2 | SAMEA6125866  | SAMEA6125866  | ERR3623776 | GCA 903987625.1 | PDS000069192.1 |
| PDT000804985.2 | SAMEA6125941  | SAMEA6125941  | ERR3623875 | GCA 903987695.1 | PDS000069192.1 |
| PDT000805001.2 | SAMEA6125940  | SAMEA6125940  | ERR3623876 | GCA 903987865.1 | PDS000069192.1 |
| PDT000805003.2 | SAMEA6125696  | SAMEA6125696  | ERR3623561 | GCA 903987905.1 | PDS000069192.1 |
| PDT000805004.2 | SAMEA6125706  | SAMEA6125706  | ERR3623568 | GCA 903987885.1 | PDS000069192.1 |
| PDT000805009.2 | SAMEA6125939  | SAMEA6125939  | ERR3623877 | GCA 903987935.1 | PDS000069192.1 |
| PDT000805012.2 | SAMEA6125707  | SAMEA6125707  | ERR3623571 | GCA 903987965.1 | PDS000069192.1 |
| PDT000805013.2 | SAMEA6125698  | SAMEA6125698  | ERR3623569 | GCA 903988005.1 | PDS000069192.1 |
| PDT000805023.2 | SAMEA6125715  | SAMEA6125715  | ERR3623580 | GCA 903988095.1 | PDS000069192.1 |
| PDT000805025.2 | SAMEA6125711  | SAMEA6125711  | ERR3623581 | GCA 903988085.1 | PDS000069192.1 |
| PDT000805032.2 | SAMEA6125680  | SAMEA6125680  | ERR3623551 | GCA 903988195.1 | PDS000069192.1 |
| PDT000805071.2 | SAMEA6125682  | SAMEA6125682  | ERR3623552 | GCA 903988525.1 | PDS000069192.1 |
| PDT000805077.2 | SAMEA6125840  | SAMEA6125840  | ERR3623767 | GCA 903988695.1 | PDS000069192.1 |
| PDT000805079.2 | SAMEA6125935  | SAMEA6125935  | ERR3623874 | GCA 903988685.1 | PDS000069192.1 |
| PDT000805085.2 | SAMEA6125836  | SAMEA6125836  | ERR3623769 | GCA 903988655.1 | PDS000069192.1 |
| PDT000805087.2 | SAMEA6125834  | SAMEA6125834  | ERR3623768 | GCA 903988635.1 | PDS000069192.1 |
| PDT000805092.2 | SAMEA6125831  | SAMEA6125831  | ERR3623765 | GCA 903988755.1 | PDS000069192.1 |
| PDT000805100.2 | SAMEA6125832  | SAMEA6125832  | ERR3623766 | GCA 903988875.1 | PDS000069192.1 |
| PDT000805149.2 | SAMEA6125929  | SAMEA6125929  | ERR3623867 | GCA 903989335.1 | PDS000069192.1 |
| PDT000805150.2 | SAMEA6125930  | SAMEA6125930  | ERR3623868 | GCA 903989355.1 | PDS000069192.1 |
| PDT000805152.2 | SAMEA6125691  | SAMEA6125691  | ERR3623869 | GCA 903989385.1 | PDS000069192.1 |
| PDT000805154.2 | SAMEA6125937  | SAMEA6125937  | ERR3623870 | GCA 903989375.1 | PDS000069192.1 |
| PDT000805156.2 | SAMEA6125933  | SAMEA6125933  | ERR3623871 | GCA 903989405.1 | PDS000069192.1 |
| PDT000805160.2 | SAMEA6125936  | SAMEA6125936  | ERR3623872 | GCA 903989445.1 | PDS000069192.1 |
| PDT000118267.2 | SAMEA1317379  | SAMEA1317379  | ERR107913  | GCA 900047245.1 | PDS000068789.1 |
| PDT000119468.2 | SAMEA1464711  | SAMEA1464711  | ERR118368  | GCA 900042055.1 | PDS000068789.1 |
| PDT000343037.2 | SAMEA1531661  | SAMEA1531661  | ERR223163  | GCA 900484395.1 | PDS000068789.1 |
| PDT000343067.2 | SAMEA1466880  | SAMEA1466880  | ERR156471  | GCA 900482805.1 | PDS000068789.1 |
| PDT000343072.2 | SAMEA1466903  | SAMEA1466903  | ERR156522  | GCA 900482725.1 | PDS000068789.1 |
| PDT000343098.2 | SAMEA1469861  | SAMEA1469861  | ERR159029  | GCA 900483075.1 | PDS000068789.1 |
| PDT000343102.2 | SAMEA1469865  | SAMEA1469865  | ERR159056  | GCA 900483415.1 | PDS000068789.1 |
| PDT000343109.2 | SAMEA1469875  | SAMEA1469875  | ERR159058  | GCA 900483315.1 | PDS000068789.1 |
| PDT000343111.2 | SAMEA1469880  | SAMEA1469880  | ERR159036  | GCA 900483145.1 | PDS000068789.1 |
| PDT000343114.2 | SAMEA1469883  | SAMEA1469883  | ERR159034  | GCA 900483115.1 | PDS000068789.1 |
| PDT000343116.2 | SAMEA1469885  | SAMEA1469885  | ERR159000  | GCA 900482695.1 | PDS000068789.1 |
| PDT000343122.2 | SAMEA1469891  | SAMEA1469891  | ERR159055  | GCA 900483495.1 | PDS000068789.1 |
| PDT000343125.2 | SAMEA1469897  | SAMEA1469897  | ERR159069  | GCA 900483455.1 | PDS000068789.1 |
| PDT000343127.2 | SAMEA1469899  | SAMEA1469899  | ERR159042  | GCA 900483385.1 | PDS000068789.1 |
| PDT000343128.2 | SAMEA1469900  | SAMEA1469900  | ERR159052  | GCA 900483245.1 | PDS000068789.1 |
| PDT000343131.2 | SAMEA1469903  | SAMEA1469903  | ERR159050  | GCA 900483255.1 | PDS000068789.1 |
| PDT000343133.2 | SAMEA1469906  | SAMEA1469906  | ERR159051  | GCA 900483275.1 | PDS000068789.1 |
| PDT000343136.2 | SAMEA1469909  | SAMEA1469909  | ERR159039  | GCA 900483135.1 | PDS000068789.1 |
| PDT000343141.2 | SAMEA1469915  | SAMEA1469915  | ERR159066  | GCA 900483885.1 | PDS000068789.1 |
| PDT000343144.2 | SAMEA1469919  | SAMEA1469919  | ERR159072  | GCA 900483695.1 | PDS000068789.1 |
| PDT000343147.2 | SAMEA1469922  | SAMEA1469922  | ERR159049  | GCA 900483225.1 | PDS000068789.1 |
| PDT000343151.2 | SAMEA1469927  | SAMEA1469927  | ERR159026  | GCA 900483045.1 | PDS000068789.1 |

|                |              |              |             |                 |                |
|----------------|--------------|--------------|-------------|-----------------|----------------|
| PDT000343160.2 | SAMEA1531663 | SAMEA1531663 | ERR177189   | GCA 900483735.1 | PDS000068789.1 |
| PDT000343164.2 | SAMEA1531669 | SAMEA1531669 | ERR177187   | GCA 900483705.1 | PDS000068789.1 |
| PDT000343170.2 | SAMEA1531677 | SAMEA1531677 | ERR177205   | GCA 900484115.1 | PDS000068789.1 |
| PDT000343171.2 | SAMEA1531678 | SAMEA1531678 | ERR177160   | GCA 900483515.1 | PDS000068789.1 |
| PDT000343184.2 | SAMEA1531693 | SAMEA1531693 | ERR177203   | GCA 900484155.1 | PDS000068789.1 |
| PDT000343186.2 | SAMEA1531696 | SAMEA1531696 | ERR177190   | GCA 900483875.1 | PDS000068789.1 |
| PDT000343189.2 | SAMEA1531699 | SAMEA1531699 | ERR177223   | GCA 900484425.1 | PDS000068789.1 |
| PDT000343192.2 | SAMEA1531702 | SAMEA1531702 | ERR177181   | GCA 900483725.1 | PDS000068789.1 |
| PDT000343193.2 | SAMEA1531703 | SAMEA1531703 | ERR177222   | GCA 900484105.1 | PDS000068789.1 |
| PDT000343200.2 | SAMEA1531710 | SAMEA1531710 | ERR177168   | GCA 900483845.1 | PDS000068789.1 |
| PDT000343204.2 | SAMEA1531715 | SAMEA1531715 | ERR177167   | GCA 900483615.1 | PDS000068789.1 |
| PDT000343207.2 | SAMEA1531719 | SAMEA1531719 | ERR177180   | GCA 900484135.1 | PDS000068789.1 |
| PDT000343208.2 | SAMEA1531721 | SAMEA1531721 | ERR177144   | GCA 900483955.1 | PDS000068789.1 |
| PDT000343211.2 | SAMEA1531724 | SAMEA1531724 | ERR177175   | GCA 900483815.1 | PDS000068789.1 |
| PDT000343214.2 | SAMEA1531731 | SAMEA1531731 | ERR177188   | GCA 900483805.1 | PDS000068789.1 |
| PDT000352912.2 | SAMEA1466924 | SAMEA1466924 | ERR156464   | GCA 900483295.1 | PDS000068789.1 |
| PDT000066771.3 | SAMN03255445 | SAMN03255445 | SRR1955586  | GCA 001018655.2 | PDS000068888.1 |
| PDT000066803.3 | SAMN03255446 | SAMN03255446 | SRR1955590  | GCA 001019275.2 | PDS000068888.1 |
| PDT000066819.3 | SAMN03255483 | SAMN03255483 | SRR1955877  | GCA 001019555.2 | PDS000068888.1 |
| PDT000258930.2 | SAMN03763946 | SAMN03763946 | SRR5912681  | GCA 002633825.1 | PDS000076724.1 |
| PDT000108697.1 | SAMN03359426 | SAMN03359426 | SRR1814613  | GCA 015616325.1 | PDS000067771.1 |
| PDT000800922.2 | SAMN13245723 | SAMN13245723 | SRR10426953 | GCA 013867445.1 | PDS000069194.1 |
| PDT000800952.2 | SAMN15589967 | SAMN15589967 | SRR12282488 | GCA 013868115.1 | PDS000069194.1 |
| PDT000800954.2 | SAMN15589968 | SAMN15589968 | SRR12282487 | GCA 013868125.1 | PDS000069194.1 |
| PDT000800957.2 | SAMN15589971 | SAMN15589971 | SRR12282494 | GCA 013868215.1 | PDS000069194.1 |
| PDT000800958.2 | SAMN15589962 | SAMN15589962 | SRR12282493 | GCA 013868225.1 | PDS000069194.1 |
| PDT000800959.2 | SAMN15589969 | SAMN15589969 | SRR12282486 | GCA 013868245.1 | PDS000069194.1 |
| PDT000800960.2 | SAMN15589966 | SAMN15589966 | SRR12282489 | GCA 013868255.1 | PDS000069194.1 |
| PDT000800961.2 | SAMN15589970 | SAMN15589970 | SRR12282495 | GCA 013868275.1 | PDS000069194.1 |
| PDT000800962.2 | SAMN15589964 | SAMN15589964 | SRR12282491 | GCA 013868315.1 | PDS000069194.1 |
| PDT000800963.2 | SAMN15589965 | SAMN15589965 | SRR12282490 | GCA 013868325.1 | PDS000069194.1 |
| PDT000800964.2 | SAMN15589963 | SAMN15589963 | SRR12282492 | GCA 013868355.1 | PDS000069194.1 |
| PDT000800965.2 | SAMN15589961 | SAMN15589961 | SRR12282496 | GCA 013868335.1 | PDS000069194.1 |
| PDT000280263.2 | SAMN07511429 | SAMN07511429 | SRR5945989  | GCA 002884555.1 | PDS000068751.1 |
| PDT000589569.1 | SAMN04505214 | SAMN04505214 | SRR3194953  | GCA 015601025.1 | PDS000068751.1 |
| PDT000790585.2 | SAMEA4553032 | SAMEA4553032 | ERR1891764  | GCA 903804895.1 | PDS000068751.1 |
| PDT000790588.2 | SAMEA4553035 | SAMEA4553035 | ERR1891767  | GCA 903804915.1 | PDS000068751.1 |
| PDT000178171.2 | SAMN03893380 | SAMN03893380 | SRR5909169  | GCA 001936765.1 | PDS000068294.1 |
| PDT000115642.2 | SAMEA1464289 | SAMEA1464289 | ERR118610   | GCA 900039665.1 | PDS000068795.1 |
| PDT000116256.2 | SAMEA1464300 | SAMEA1464300 | ERR118611   | GCA 900018715.1 | PDS000068795.1 |
| PDT000116876.2 | SAMEA1464619 | SAMEA1464619 | ERR129323   | GCA 900054935.1 | PDS000068795.1 |
| PDT000343166.2 | SAMEA1531672 | SAMEA1531672 | ERR177216   | GCA 900484025.1 | PDS000068795.1 |
| PDT000343172.2 | SAMEA1531679 | SAMEA1531679 | ERR177212   | GCA 900484015.1 | PDS000068795.1 |
| PDT000343173.2 | SAMEA1531680 | SAMEA1531680 | ERR177213   | GCA 900483975.1 | PDS000068795.1 |
| PDT000343187.2 | SAMEA1531697 | SAMEA1531697 | ERR177211   | GCA 900484045.1 | PDS000068795.1 |
| PDT000343232.2 | SAMEA1531725 | SAMEA1531725 | ERR177218   | GCA 900490425.1 | PDS000068795.1 |
| PDT000063467.2 | SAMEA1324566 | SAMEA1324566 | ERR134875   | GCA 000982775.1 | PDS000068682.1 |
| PDT000078975.2 | SAMEA1710081 | SAMEA1710081 | ERR256886   | GCA 001194825.1 | PDS000068682.1 |
| PDT000079023.2 | SAMEA1710082 | SAMEA1710082 | ERR256887   | GCA 001195805.1 | PDS000068682.1 |
| PDT000079176.2 | SAMEA1466473 | SAMEA1466473 | ERR137936   | GCA 001199015.1 | PDS000068682.1 |
| PDT000079182.2 | SAMEA1324548 | SAMEA1324548 | ERR134874   | GCA 001199175.1 | PDS000068682.1 |
| PDT000079299.2 | SAMEA1710088 | SAMEA1710088 | ERR256888   | GCA 001201615.1 | PDS000068682.1 |
| PDT000079799.2 | SAMEA1324550 | SAMEA1324550 | ERR134873   | GCA 001212145.1 | PDS000068682.1 |
| PDT000090516.2 | SAMEA1466448 | SAMEA1466448 | ERR137921   | GCA 001353415.1 | PDS000068682.1 |
| PDT000423471.1 | SAMEA4469765 | SAMEA4469765 | ERR1800570  | GCA 015607225.1 | PDS000068305.1 |
| PDT000079692.2 | SAMEA1324515 | SAMEA1324515 | ERR134684   | GCA 001209885.1 | PDS000069086.1 |
| PDT000079733.2 | SAMEA1710094 | SAMEA1710094 | ERR249316   | GCA 001210725.1 | PDS000069086.1 |
| PDT000079822.2 | SAMEA1324710 | SAMEA1324710 | ERR134687   | GCA 001212605.1 | PDS000069086.1 |
| PDT000090452.2 | SAMEA1324589 | SAMEA1324589 | ERR134698   | GCA 001352135.1 | PDS000069086.1 |
| PDT000090461.2 | SAMEA1324609 | SAMEA1324609 | ERR134850   | GCA 001352315.1 | PDS000069086.1 |
| PDT000115616.2 | SAMEA1469563 | SAMEA1469563 | ERR158688   | GCA 900018215.1 | PDS000068249.1 |
| PDT000115919.2 | SAMEA1464212 | SAMEA1464212 | ERR118358   | GCA 900018045.1 | PDS000068249.1 |
| PDT000119249.2 | SAMEA1469630 | SAMEA1469630 | ERR158740   | GCA 900036905.1 | PDS000068249.1 |
| PDT000119290.2 | SAMEA1469694 | SAMEA1469694 | ERR158754   | GCA 900042695.1 | PDS000068249.1 |
| PDT000119386.2 | SAMEA1469706 | SAMEA1469706 | ERR158737   | GCA 900049405.1 | PDS000068249.1 |
| PDT000070480.2 | SAMN03197228 | SAMN03197228 | SRR1655460  | GCA 001060705.1 | PDS000069613.1 |
| PDT000070510.2 | SAMN03197230 | SAMN03197230 | SRR1655462  | GCA 001061375.1 | PDS000069613.1 |
| PDT000070512.2 | SAMN03197246 | SAMN03197246 | SRR1655478  | GCA 001061405.1 | PDS000069613.1 |



|                |                |                |             |                 |                |
|----------------|----------------|----------------|-------------|-----------------|----------------|
| PDT000070556.2 | SAMN03197222   | SAMN03197222   | SRR1655454  | GCA 001062455.1 | PDS000069613.1 |
| PDT000070559.2 | SAMN03197229   | SAMN03197229   | SRR1655461  | GCA 001062495.1 | PDS000069613.1 |
| PDT000772373.2 | SAMEA103891246 | SAMEA103891246 | ERR2533477  | GCA 903811735.1 | PDS000069486.1 |
| PDT000772375.2 | SAMEA103891248 | SAMEA103891248 | ERR2533479  | GCA 903811745.1 | PDS000069486.1 |
| PDT000772377.2 | SAMEA103891250 | SAMEA103891250 | ERR2533481  | GCA 903811775.1 | PDS000069486.1 |
| PDT000772381.2 | SAMEA103891254 | SAMEA103891254 | ERR2533485  | GCA 903811815.1 | PDS000069486.1 |
| PDT000772430.2 | SAMEA103891304 | SAMEA103891304 | ERR2533535  | GCA 903812345.1 | PDS000069486.1 |
| PDT000772399.2 | SAMEA103891272 | SAMEA103891272 | ERR2533503  | GCA 903812005.1 | PDS000069482.1 |
| PDT000772403.2 | SAMEA103891276 | SAMEA103891276 | ERR2533507  | GCA 903812035.1 | PDS000069482.1 |
| PDT000772405.2 | SAMEA103891278 | SAMEA103891278 | ERR2533509  | GCA 903812065.1 | PDS000069482.1 |
| PDT000772406.2 | SAMEA103891279 | SAMEA103891279 | ERR2533510  | GCA 903812055.1 | PDS000069482.1 |
| PDT000772408.2 | SAMEA103891281 | SAMEA103891281 | ERR2533512  | GCA 903812095.1 | PDS000069482.1 |
| PDT000772340.2 | SAMEA103891213 | SAMEA103891213 | ERR2533444  | GCA 903811405.1 | PDS000069489.1 |
| PDT000772345.2 | SAMEA103891218 | SAMEA103891218 | ERR2533449  | GCA 903811465.1 | PDS000069489.1 |
| PDT000772349.2 | SAMEA103891222 | SAMEA103891222 | ERR2533453  | GCA 903811495.1 | PDS000069489.1 |
| PDT000772359.2 | SAMEA103891232 | SAMEA103891232 | ERR2533463  | GCA 903811595.1 | PDS000069489.1 |
| PDT000772364.2 | SAMEA103891237 | SAMEA103891237 | ERR2533468  | GCA 903811655.1 | PDS000069489.1 |
| PDT000070611.2 | SAMN03197748   | SAMN03197748   | SRR1655980  | GCA 001063675.1 | PDS000069602.1 |
| PDT000070681.2 | SAMN03197682   | SAMN03197682   | SRR1655914  | GCA 001065215.1 | PDS000069602.1 |
| PDT000070688.2 | SAMN03197736   | SAMN03197736   | SRR1655968  | GCA 001065355.1 | PDS000069602.1 |
| PDT000070716.2 | SAMN03197893   | SAMN03197893   | SRR1656125  | GCA 001065975.1 | PDS000069602.1 |
| PDT000070765.2 | SAMN03197904   | SAMN03197904   | SRR1656136  | GCA 001066985.1 | PDS000069602.1 |
| PDT000772734.2 | SAMEA4008472   | SAMEA4008472   | ERR1723852  | GCA 903798795.1 | PDS000069435.1 |
| PDT000772762.2 | SAMEA4008501   | SAMEA4008501   | ERR1723881  | GCA 903799065.1 | PDS000069435.1 |
| PDT000772787.2 | SAMEA4008529   | SAMEA4008529   | ERR1723906  | GCA 903799315.1 | PDS000069435.1 |
| PDT000772810.2 | SAMEA4008552   | SAMEA4008552   | ERR1723929  | GCA 903799555.1 | PDS000069435.1 |
| PDT000772821.2 | SAMEA4008563   | SAMEA4008563   | ERR1723940  | GCA 903799665.1 | PDS000069435.1 |
| PDT000112301.2 | SAMEA1317427   | SAMEA1317427   | ERR111101   | GCA 900040565.1 | PDS000068149.1 |
| PDT000116561.2 | SAMEA1317480   | SAMEA1317480   | ERR111098   | GCA 900046295.1 | PDS000068149.1 |
| PDT000116706.2 | SAMEA1317506   | SAMEA1317506   | ERR111096   | GCA 900046285.1 | PDS000068149.1 |
| PDT000118522.2 | SAMEA1317460   | SAMEA1317460   | ERR111099   | GCA 900041145.1 | PDS000068149.1 |
| PDT000766282.2 | SAMN14906906   | SAMN14906906   | SRR11787397 | GCA 013338225.1 | PDS000068923.2 |
| PDT000813679.1 | SAMN12776154   | SAMN12776154   | SRR10179286 | GCA 009457955.1 | PDS000068923.2 |
| PDT000066812.3 | SAMN03255471   | SAMN03255471   | SRR1955849  | GCA 001019455.2 | PDS000068924.1 |
| PDT000822343.1 | SAMN03878399   | SAMN03878399   | SRR2106469  | GCA 015542955.1 | PDS000070381.1 |
| PDT000822344.1 | SAMN03878400   | SAMN03878400   | SRR2106470  | GCA 015542995.1 | PDS000070381.1 |
| PDT000822346.1 | SAMN03878402   | SAMN03878402   | SRR2106472  | GCA 015542875.1 | PDS000070381.1 |
| PDT000822347.1 | SAMN03878403   | SAMN03878403   | SRR2106473  | GCA 015542935.1 | PDS000070381.1 |
| PDT000812778.1 | SAMN10038798   | SAMN10038798   | SRR7839600  | GCA 015570255.1 | PDS000069942.1 |
| PDT000812807.1 | SAMN10038750   | SAMN10038750   | SRR7839697  | GCA 015569065.1 | PDS000069942.1 |
| PDT000812831.1 | SAMN10038832   | SAMN10038832   | SRR7839731  | GCA 015568555.1 | PDS000069942.1 |
| PDT000812861.1 | SAMN10038743   | SAMN10038743   | SRR7839855  | GCA 015569455.1 | PDS000069942.1 |
| PDT000812860.1 | SAMN10038744   | SAMN10038744   | SRR7839854  | GCA 015568415.1 | PDS000069931.1 |
| PDT000812876.1 | SAMN10038813   | SAMN10038813   | SRR7839892  | GCA 015567675.1 | PDS000069931.1 |
| PDT000812888.1 | SAMN10038734   | SAMN10038734   | SRR7839932  | GCA 015568015.1 | PDS000069931.1 |
| PDT000812922.1 | SAMN10038985   | SAMN10038985   | SRR7840003  | GCA 015566895.1 | PDS000069931.1 |
| PDT000790217.2 | SAMEA4008673   | SAMEA4008673   | ERR1715375  | GCA 903800735.1 | PDS000069984.1 |
| PDT000813971.1 | SAMN12775860   | SAMN12775860   | SRR10178973 | GCA 009463805.1 | PDS000070001.1 |
| PDT000822057.1 | SAMN07674874   | SAMN07674874   | SRR6053649  | GCA 015545335.1 | PDS000070382.1 |
| PDT000822058.1 | SAMN07674873   | SAMN07674873   | SRR6053650  | GCA 015545275.1 | PDS000070382.1 |
| PDT000822062.1 | SAMN07674875   | SAMN07674875   | SRR6053654  | GCA 015545195.1 | PDS000070382.1 |
| PDT000822063.1 | SAMN07674876   | SAMN07674876   | SRR6053655  | GCA 015545175.1 | PDS000070382.1 |
| PDT000116103.2 | SAMEA1469632   | SAMEA1469632   | ERR158762   | GCA 900045165.1 | PDS000070000.1 |
| PDT000116463.2 | SAMEA1317508   | SAMEA1317508   | ERR107858   | GCA 900045775.1 | PDS000070000.1 |
| PDT000118306.2 | SAMEA1568637   | SAMEA1568637   | ERR211890   | GCA 900033755.1 | PDS000070000.1 |
| PDT000119303.2 | SAMEA1317479   | SAMEA1317479   | ERR107856   | GCA 900037695.1 | PDS000070000.1 |
| PDT000238896.2 | SAMN03893386   | SAMN03893386   | SRR5909187  | GCA 002275795.1 | PDS000068474.1 |
| PDT000238836.2 | SAMN03893373   | SAMN03893373   | SRR5909200  | GCA 002274555.1 | PDS000068484.1 |
| PDT000238883.2 | SAMN03893349   | SAMN03893349   | SRR5909250  | GCA 002275545.1 | PDS000068484.1 |
| PDT000238837.2 | SAMN03893379   | SAMN03893379   | SRR5909176  | GCA 002274605.1 | PDS000068481.1 |
| PDT000164706.2 | SAMEA2298749   | SAMEA2298749   | ERR490621   | GCA 900097845.1 | PDS000068426.1 |
| PDT000164832.2 | SAMEA2298701   | SAMEA2298701   | ERR505339   | GCA 900097875.1 | PDS000068426.1 |
| PDT000164833.2 | SAMEA2298719   | SAMEA2298719   | ERR505357   | GCA 900097935.1 | PDS000068426.1 |
| PDT000076845.3 | SAMN03787340   | SAMN03787340   | SRR6484480  | GCA 001183725.2 | PDS000069002.1 |
| PDT000164407.3 | SAMN04966146   | SAMN04966146   | SRR6484373  | GCA 001735655.2 | PDS000069002.1 |
| PDT000286641.2 | SAMN04966149   | SAMN04966149   | SRR6484430  | GCA 001717705.2 | PDS000069002.1 |
| PDT000090337.2 | SAMEA1463305   | SAMEA1463305   | ERR144765   | GCA 001349375.1 | PDS000068949.1 |
| PDT000090349.2 | SAMEA1463451   | SAMEA1463451   | ERR302708   | GCA 001349615.1 | PDS000068949.1 |

|                |                |                |             |                 |                |
|----------------|----------------|----------------|-------------|-----------------|----------------|
| PDT000090356.2 | SAMEA1463484   | SAMEA1463484   | ERR144838   | GCA 001349755.1 | PDS000068949.1 |
| PDT000164681.2 | SAMEA2298734   | SAMEA2298734   | ERR505372   | GCA 900097575.1 | PDS000068982.1 |
| PDT000164693.2 | SAMEA2298742   | SAMEA2298742   | ERR505380   | GCA 900097635.1 | PDS000068982.1 |
| PDT000164835.2 | SAMEA2298715   | SAMEA2298715   | ERR505353   | GCA 900097365.1 | PDS000068982.1 |
| PDT000772844.2 | SAMEA4008586   | SAMEA4008586   | ERR1723963  | GCA 903799905.1 | PDS000069431.1 |
| PDT000772845.2 | SAMEA4008587   | SAMEA4008587   | ERR1723964  | GCA 903799895.1 | PDS000069431.1 |
| PDT000772851.2 | SAMEA4008593   | SAMEA4008593   | ERR1723970  | GCA 903799975.1 | PDS000069431.1 |
| PDT000772455.2 | SAMEA103891329 | SAMEA103891329 | ERR2533553  | GCA 903812695.1 | PDS000069462.1 |
| PDT000772469.2 | SAMEA103891343 | SAMEA103891343 | ERR2533574  | GCA 903812915.1 | PDS000069462.1 |
| PDT000791268.2 | SAMEA70246918  | SAMEA70246918  | ERR2525275  | GCA 903810105.1 | PDS000069462.1 |
| PDT000772482.2 | SAMEA103891356 | SAMEA103891356 | ERR2533587  | GCA 903813045.1 | PDS000069460.1 |
| PDT000772483.2 | SAMEA103891357 | SAMEA103891357 | ERR2533588  | GCA 903813055.1 | PDS000069460.1 |
| PDT000772485.2 | SAMEA103891359 | SAMEA103891359 | ERR2533590  | GCA 903813075.1 | PDS000069460.1 |
| PDT000790318.2 | SAMEA4008774   | SAMEA4008774   | ERR1715474  | GCA 903803515.1 | PDS000069407.1 |
| PDT000790333.2 | SAMEA4008789   | SAMEA4008789   | ERR1715489  | GCA 903803665.1 | PDS000069407.1 |
| PDT000790375.2 | SAMEA4552951   | SAMEA4552951   | ERR3012678  | GCA 903804095.1 | PDS000069407.1 |
| PDT000790628.2 | SAMEA4553077   | SAMEA4553077   | ERR1891808  | GCA 903805335.1 | PDS000069378.1 |
| PDT000790630.2 | SAMEA4553079   | SAMEA4553079   | ERR1891810  | GCA 903805355.1 | PDS000069378.1 |
| PDT000790667.2 | SAMEA4553115   | SAMEA4553115   | ERR1891846  | GCA 903805705.1 | PDS000069378.1 |
| PDT000782289.2 | SAMEA4008654   | SAMEA4008654   | ERR1715357  | GCA 903800545.1 | PDS000069421.1 |
| PDT000782294.2 | SAMEA4008659   | SAMEA4008659   | ERR1715362  | GCA 903800595.1 | PDS000069421.1 |
| PDT000782295.2 | SAMEA4008660   | SAMEA4008660   | ERR1715363  | GCA 903800605.1 | PDS000069421.1 |
| PDT000618823.1 | SAMN12768981   | SAMN12768981   | SRR10126886 | GCA 015600385.1 | PDS000074416.1 |
| PDT000871167.1 | SAMN15541369   | SAMN15541369   | SRR12233420 | GCA 015541065.1 | PDS000074416.1 |
| PDT000871199.1 | SAMN15541340   | SAMN15541340   | SRR12233452 | GCA 015541665.1 | PDS000074416.1 |
| PDT000871178.1 | SAMN15541359   | SAMN15541359   | SRR12233431 | GCA 015541745.1 | PDS000074500.2 |
| PDT000871196.1 | SAMN15541343   | SAMN15541343   | SRR12233449 | GCA 015541705.1 | PDS000074500.2 |
| PDT000871211.1 | SAMN15541318   | SAMN15541318   | SRR12233464 | GCA 015541605.1 | PDS000074500.2 |
| PDT000791244.2 | SAMEA70228918  | SAMEA70228918  | ERR2525256  | GCA 903809925.1 | PDS000072898.1 |
| PDT000852674.1 | SAMN12642257   | SAMN12642257   | SRR11016303 | GCA 014831885.1 | PDS000072898.1 |
| PDT000852675.1 | SAMN12642256   | SAMN12642256   | SRR11016304 | GCA 014831915.1 | PDS000072898.1 |
| PDT000090533.2 | SAMEA1466489   | SAMEA1466489   | ERR302765   | GCA 001353755.1 | PDS000072905.1 |
| PDT000852668.1 | SAMN12642263   | SAMN12642263   | SRR11016297 | GCA 014831775.1 | PDS000072905.1 |
| PDT000852679.1 | SAMN12642251   | SAMN12642251   | SRR11016258 | GCA 014831995.1 | PDS000072905.1 |
| PDT000852747.1 | SAMN12642185   | SAMN12642185   | SRR11016217 | GCA 014835685.1 | PDS000072569.2 |
| PDT000852716.1 | SAMN12642214   | SAMN12642214   | SRR11016246 | GCA 014832705.1 | PDS000072900.1 |
| PDT000852733.1 | SAMN12642200   | SAMN12642200   | SRR11016201 | GCA 014835395.1 | PDS000072900.1 |
| PDT000852739.1 | SAMN12642194   | SAMN12642194   | SRR11016208 | GCA 014835515.1 | PDS000072900.1 |
| PDT000118092.2 | SAMEA1317333   | SAMEA1317333   | ERR107824   | GCA 900038455.1 | PDS000067827.1 |
| PDT000119287.2 | SAMEA1317310   | SAMEA1317310   | ERR107834   | GCA 900048475.1 | PDS000067827.1 |
| PDT000112181.2 | SAMEA1464487   | SAMEA1464487   | ERR124500   | GCA 900050255.1 | PDS000068027.1 |
| PDT000117237.2 | SAMEA1469566   | SAMEA1469566   | ERR158793   | GCA 900017625.1 | PDS000068027.1 |
| PDT000117183.2 | SAMEA1317456   | SAMEA1317456   | ERR107807   | GCA 900019075.1 | PDS000068038.1 |
| PDT000118799.2 | SAMEA1317364   | SAMEA1317364   | ERR107914   | GCA 900039675.1 | PDS000068038.1 |
| PDT000116191.2 | SAMEA1464658   | SAMEA1464658   | ERR118405   | GCA 900042175.1 | PDS000068182.1 |
| PDT000116437.2 | SAMEA1464614   | SAMEA1464614   | ERR118402   | GCA 900040995.1 | PDS000068182.1 |
| PDT000111951.2 | SAMEA1317440   | SAMEA1317440   | ERR107909   | GCA 900025015.1 | PDS000068415.1 |
| PDT000112198.2 | SAMEA1464397   | SAMEA1464397   | ERR118521   | GCA 900043925.1 | PDS000068415.1 |
| PDT000766314.2 | SAMN14906875   | SAMN14906875   | SRR11787383 | GCA 013338865.1 | PDS000068547.1 |
| PDT000813915.1 | SAMN12775918   | SAMN12775918   | SRR10178988 | GCA 009462675.1 | PDS000068547.1 |
| PDT000766312.2 | SAMN14906877   | SAMN14906877   | SRR11787381 | GCA 013338825.1 | PDS000068559.1 |
| PDT000813908.1 | SAMN12775923   | SAMN12775923   | SRR10178982 | GCA 009462545.1 | PDS000068559.1 |
| PDT000079124.2 | SAMEA1463480   | SAMEA1463480   | ERR302669   | GCA 001197935.1 | PDS000068680.1 |
| PDT000079652.2 | SAMEA1463410   | SAMEA1463410   | ERR144771   | GCA 001209085.1 | PDS000068680.1 |
| PDT000371275.2 | SAMD00083515   | SAMD00083515   | DRR107155   | GCA 003419785.1 | PDS000068688.1 |
| PDT000371404.2 | SAMD00083639   | SAMD00083639   | DRR107279   | GCA 003422445.1 | PDS000068688.1 |
| PDT000371290.2 | SAMD00083527   | SAMD00083527   | DRR107167   | GCA 003420105.1 | PDS000068679.1 |
| PDT000371415.2 | SAMD00083650   | SAMD00083650   | DRR107290   | GCA 003422665.1 | PDS000068679.1 |
| PDT000371195.2 | SAMD00083444   | SAMD00083444   | DRR107084   | GCA 003417205.1 | PDS000068689.1 |
| PDT000371269.2 | SAMD00083509   | SAMD00083509   | DRR107149   | GCA 003419665.1 | PDS000068689.1 |
| PDT000371288.2 | SAMD00083524   | SAMD00083524   | DRR107164   | GCA 003420065.1 | PDS000068681.1 |
| PDT000371413.2 | SAMD00083648   | SAMD00083648   | DRR107288   | GCA 003422625.1 | PDS000068681.1 |
| PDT000371285.2 | SAMD00083521   | SAMD00083521   | DRR107161   | GCA 003420005.1 | PDS000068684.1 |
| PDT000371411.2 | SAMD00083646   | SAMD00083646   | DRR107286   | GCA 003422585.1 | PDS000068684.1 |
| PDT000371292.2 | SAMD00083529   | SAMD00083529   | DRR107169   | GCA 003420145.1 | PDS000068678.1 |
| PDT000371416.2 | SAMD00083651   | SAMD00083651   | DRR107291   | GCA 003422685.1 | PDS000068678.1 |
| PDT000371287.2 | SAMD00083523   | SAMD00083523   | DRR107163   | GCA 003420045.1 | PDS000068683.1 |
| PDT000371412.2 | SAMD00083647   | SAMD00083647   | DRR107287   | GCA 003422605.1 | PDS000068683.1 |

|                |              |              |             |                 |                |
|----------------|--------------|--------------|-------------|-----------------|----------------|
| PDT000371194.2 | SAMD00083443 | SAMD00083443 | DRR107083   | GCA 003417185.1 | PDS000068690.1 |
| PDT000371267.2 | SAMD00083507 | SAMD00083507 | DRR107147   | GCA 003419625.1 | PDS000068690.1 |
| PDT000766344.2 | SAMN14906844 | SAMN14906844 | SRR11787463 | GCA 013339465.1 | PDS000068798.1 |
| PDT000813757.1 | SAMN12776077 | SAMN12776077 | SRR10179156 | GCA 009459515.1 | PDS000068798.1 |
| PDT000343176.2 | SAMEA1531683 | SAMEA1531683 | ERR177209   | GCA 900484065.1 | PDS000068791.1 |
| PDT000343177.2 | SAMEA1531684 | SAMEA1531684 | ERR177214   | GCA 900484035.1 | PDS000068791.1 |
| PDT000118979.2 | SAMEA1317311 | SAMEA1317311 | ERR107912   | GCA 900047235.1 | PDS000068807.1 |
| PDT000343100.2 | SAMEA1469863 | SAMEA1469863 | ERR159009   | GCA 900482975.1 | PDS000068807.1 |
| PDT000117053.2 | SAMEA1469635 | SAMEA1469635 | ERR158759   | GCA 900048215.1 | PDS000068790.1 |
| PDT000343206.2 | SAMEA1531717 | SAMEA1531717 | ERR177196   | GCA 900483965.1 | PDS000068790.1 |
| PDT000343120.2 | SAMEA1469889 | SAMEA1469889 | ERR159013   | GCA 900482935.1 | PDS000068801.1 |
| PDT000343165.2 | SAMEA1531671 | SAMEA1531671 | ERR177177   | GCA 900483635.1 | PDS000068801.1 |
| PDT000343129.2 | SAMEA1469901 | SAMEA1469901 | ERR159024   | GCA 900483175.1 | PDS000068799.1 |
| PDT000343159.2 | SAMEA1469940 | SAMEA1469940 | ERR159061   | GCA 900483545.1 | PDS000068799.1 |
| PDT000343210.2 | SAMEA1531723 | SAMEA1531723 | ERR177155   | GCA 900483905.1 | PDS000068788.1 |
| PDT000343223.2 | SAMEA1531740 | SAMEA1531740 | ERR177202   | GCA 900483935.1 | PDS000068788.1 |
| PDT000343101.2 | SAMEA1469864 | SAMEA1469864 | ERR159047   | GCA 900483445.1 | PDS000068806.1 |
| PDT000343143.2 | SAMEA1469918 | SAMEA1469918 | ERR159046   | GCA 900483285.1 | PDS000068806.1 |
| PDT000813701.1 | SAMN12776131 | SAMN12776131 | SRR10179313 | GCA 009458395.1 | PDS000068886.1 |
| PDT000813977.1 | SAMN12775855 | SAMN12775855 | SRR10179290 | GCA 009463915.1 | PDS000068886.1 |
| PDT000066818.3 | SAMN03255486 | SAMN03255486 | SRR1955924  | GCA 001019575.2 | PDS000068892.1 |
| PDT000066780.3 | SAMN03255458 | SAMN03255458 | SRR1955625  | GCA 001018835.2 | PDS000068893.1 |
| PDT000790237.2 | SAMEA4008693 | SAMEA4008693 | ERR1715395  | GCA 903801195.1 | PDS000068893.1 |
| PDT000766334.2 | SAMN14906854 | SAMN14906854 | SRR11787452 | GCA 013339265.1 | PDS000068898.1 |
| PDT000813699.1 | SAMN12776134 | SAMN12776134 | SRR10179309 | GCA 009458365.1 | PDS000068898.1 |
| PDT000066782.3 | SAMN03255454 | SAMN03255454 | SRR1955616  | GCA 001018805.2 | PDS000068890.1 |
| PDT000813676.1 | SAMN12776157 | SAMN12776157 | SRR10179283 | GCA 009457905.1 | PDS000069074.1 |
| PDT000083689.2 | SAMEA2384017 | SAMEA2384017 | ERR540221   | GCA 001287605.1 | PDS000069071.1 |
| PDT000083823.2 | SAMEA2384598 | SAMEA2384598 | ERR554520   | GCA 001290305.1 | PDS000069071.1 |
| PDT000499978.2 | SAMN09475317 | SAMN09475317 | SRR8137540  | GCA 005153985.1 | PDS000069226.1 |
| PDT000531941.2 | SAMN10346776 | SAMN10346776 | SRR9161634  | GCA 006370485.1 | PDS000069226.1 |
| PDT000080084.2 | SAMEA862629  | SAMEA862629  | ERR024976   | GCA 001224305.1 | PDS000069215.1 |
| PDT000080365.2 | SAMEA862563  | SAMEA862563  | ERR024979   | GCA 001234525.1 | PDS000069215.1 |
| PDT000079792.2 | SAMEA1324719 | SAMEA1324719 | ERR134669   | GCA 001212005.1 | PDS000069229.1 |
| PDT000079814.2 | SAMEA1324590 | SAMEA1324590 | ERR134678   | GCA 001212445.1 | PDS000069229.1 |
| PDT000080162.2 | SAMEA734767  | SAMEA734767  | ERR017232   | GCA 001227025.1 | PDS000069210.1 |
| PDT000080421.2 | SAMEA734761  | SAMEA734761  | ERR017234   | GCA 001236405.1 | PDS000069210.1 |
| PDT000790220.2 | SAMEA4008676 | SAMEA4008676 | ERR1715378  | GCA 903800775.1 | PDS000069419.1 |
| PDT000790223.2 | SAMEA4008679 | SAMEA4008679 | ERR1715381  | GCA 903800845.1 | PDS000069417.1 |
| PDT000790227.2 | SAMEA4008683 | SAMEA4008683 | ERR1715385  | GCA 903800905.1 | PDS000069416.1 |
| PDT000790229.2 | SAMEA4008685 | SAMEA4008685 | ERR1715387  | GCA 903800955.1 | PDS000069415.1 |
| PDT000782296.2 | SAMEA4008661 | SAMEA4008661 | ERR1715364  | GCA 903800615.1 | PDS000069420.1 |
| PDT000782297.2 | SAMEA4008662 | SAMEA4008662 | ERR1715365  | GCA 903800635.1 | PDS000069420.1 |
| PDT000782275.2 | SAMEA4008640 | SAMEA4008640 | ERR1715343  | GCA 903800405.1 | PDS000069422.1 |
| PDT000782278.2 | SAMEA4008643 | SAMEA4008643 | ERR1715346  | GCA 903800455.1 | PDS000069422.1 |
| PDT000132739.2 | SAMEA2383858 | SAMEA2383858 | ERR554068   | GCA 900081175.1 | PDS000069423.1 |
| PDT000132898.2 | SAMEA2384351 | SAMEA2384351 | ERR554275   | GCA 900081565.1 | PDS000069423.1 |
| PDT000782264.2 | SAMEA4008629 | SAMEA4008629 | ERR1715332  | GCA 903800315.1 | PDS000069424.1 |
| PDT000782267.2 | SAMEA4008632 | SAMEA4008632 | ERR1715335  | GCA 903800325.1 | PDS000069424.1 |
| PDT000766299.2 | SAMN14906888 | SAMN14906888 | SRR11787433 | GCA 013338565.1 | PDS000069542.1 |
| PDT000813831.1 | SAMN12776003 | SAMN12776003 | SRR10179238 | GCA 009460985.1 | PDS000069542.1 |
| PDT000766295.2 | SAMN14906894 | SAMN14906894 | SRR11787426 | GCA 013338475.1 | PDS000069544.1 |
| PDT000813857.1 | SAMN12775976 | SAMN12775976 | SRR10179268 | GCA 009461525.1 | PDS000069544.1 |
| PDT000766303.2 | SAMN14906885 | SAMN14906885 | SRR11787372 | GCA 013338645.1 | PDS000069539.1 |
| PDT000813878.1 | SAMN12775955 | SAMN12775955 | SRR10178947 | GCA 009461925.1 | PDS000069539.1 |
| PDT000766301.2 | SAMN14906887 | SAMN14906887 | SRR11787370 | GCA 013338605.1 | PDS000069541.1 |
| PDT000813871.1 | SAMN12775965 | SAMN12775965 | SRR10178936 | GCA 009461755.1 | PDS000069541.1 |
| PDT000766308.2 | SAMN14906879 | SAMN14906879 | SRR11787379 | GCA 013338745.1 | PDS000069537.1 |
| PDT000813903.1 | SAMN12775929 | SAMN12775929 | SRR10178976 | GCA 009462445.1 | PDS000069537.1 |
| PDT000766288.2 | SAMN14906919 | SAMN14906919 | SRR11787445 | GCA 013338345.1 | PDS000069547.1 |
| PDT000813774.1 | SAMN12776059 | SAMN12776059 | SRR10179176 | GCA 009459865.1 | PDS000069547.1 |
| PDT000766304.2 | SAMN14906884 | SAMN14906884 | SRR11787373 | GCA 013338665.1 | PDS000069538.1 |
| PDT000813884.1 | SAMN12775948 | SAMN12775948 | SRR10178955 | GCA 009462055.1 | PDS000069538.1 |
| PDT000132716.2 | SAMEA2383906 | SAMEA2383906 | ERR554115   | GCA 900081255.1 | PDS000069545.1 |
| PDT000132770.2 | SAMEA2384407 | SAMEA2384407 | ERR554330   | GCA 900081725.1 | PDS000069545.1 |
| PDT000132774.2 | SAMEA2383977 | SAMEA2383977 | ERR540181   | GCA 900080875.1 | PDS000069534.1 |
| PDT000132938.2 | SAMEA2383945 | SAMEA2383945 | ERR540149   | GCA 900080915.1 | PDS000069534.1 |
| PDT000116703.2 | SAMEA1464271 | SAMEA1464271 | ERR124488   | GCA 900064785.1 | PDS000069690.1 |

|                |               |               |             |                 |                |
|----------------|---------------|---------------|-------------|-----------------|----------------|
| PDT000119567.2 | SAMEA1464690  | SAMEA1464690  | ERR118487   | GCA 900045075.1 | PDS000069690.1 |
| PDT000170434.2 | SAMEA3449015  | SAMEA3449015  | ERR1069868  | GCA 900124955.1 | PDS000069689.1 |
| PDT000170536.2 | SAMEA3448986  | SAMEA3448986  | ERR1069839  | GCA 900124705.1 | PDS000069689.1 |
| PDT000686914.2 | SAMN12251214  | SAMN12251214  | SRR10906019 | GCA 010609995.1 | PDS000069790.1 |
| PDT000686927.2 | SAMN12251215  | SAMN12251215  | SRR10906017 | GCA 010612605.1 | PDS000069790.1 |
| PDT000112164.2 | SAMEA1464476  | SAMEA1464476  | ERR129333   | GCA 900017535.1 | PDS000069789.1 |
| PDT000119032.2 | SAMEA1568611  | SAMEA1568611  | ERR211898   | GCA 900043645.1 | PDS000069789.1 |
| PDT000812835.1 | SAMN10038783  | SAMN10038783  | SRR7839749  | GCA 015569595.1 | PDS000069991.1 |
| PDT000812857.1 | SAMN10038739  | SAMN10038739  | SRR7839851  | GCA 015568395.1 | PDS000069991.1 |
| PDT000589507.1 | SAMN04505152  | SAMN04505152  | SRR3194891  | GCA 015602145.1 | PDS000070002.1 |
| PDT000589565.1 | SAMN04505210  | SAMN04505210  | SRR3194949  | GCA 015600985.1 | PDS000070002.1 |
| PDT000589497.1 | SAMN04505142  | SAMN04505142  | SRR3194881  | GCA 015602345.1 | PDS000069992.1 |
| PDT000589544.1 | SAMN04505189  | SAMN04505189  | SRR3194928  | GCA 015601405.1 | PDS000069992.1 |
| PDT000589552.1 | SAMN04505197  | SAMN04505197  | SRR3194936  | GCA 015601325.1 | PDS000069990.1 |
| PDT000589562.1 | SAMN04505207  | SAMN04505207  | SRR3194946  | GCA 015601085.1 | PDS000069990.1 |
| PDT000589496.1 | SAMN04505141  | SAMN04505141  | SRR3194880  | GCA 015602185.1 | PDS000069997.1 |
| PDT000589519.1 | SAMN04505164  | SAMN04505164  | SRR3194903  | GCA 015601845.1 | PDS000069997.1 |
| PDT000589516.1 | SAMN04505161  | SAMN04505161  | SRR3194900  | GCA 015601985.1 | PDS000069998.1 |
| PDT000589517.1 | SAMN04505162  | SAMN04505162  | SRR3194901  | GCA 015601885.1 | PDS000069998.1 |
| PDT000589551.1 | SAMN04505196  | SAMN04505196  | SRR3194935  | GCA 015601285.1 | PDS000069986.1 |
| PDT000589558.1 | SAMN04505203  | SAMN04505203  | SRR3194942  | GCA 015601225.1 | PDS000069986.1 |
| PDT000904300.1 | SAMN09401033  | SAMN09401033  | SRR7296960  | GCA 015715335.1 | PDS000076894.1 |
| PDT000904336.1 | SAMN09400992  | SAMN09400992  | SRR7297474  | GCA 015716055.1 | PDS000076894.1 |
| PDT000904522.1 | SAMN12220495  | SAMN12220495  | SRR9647294  | GCA 015725915.1 | PDS000076890.1 |
| PDT000904561.1 | SAMN11285089  | SAMN11285089  | SRR8810617  | GCA 015726705.1 | PDS000076890.1 |
| PDT000904321.1 | SAMN09401010  | SAMN09401010  | SRR7297239  | GCA 015715765.1 | PDS000076891.1 |
| PDT000904681.1 | SAMN09401071  | SAMN09401071  | SRR7297460  | GCA 015729185.1 | PDS000076891.1 |
| PDT000904429.1 | SAMN09400897  | SAMN09400897  | SRR7297259  | GCA 015717935.1 | PDS000076886.1 |
| PDT000904645.1 | SAMN09401108  | SAMN09401108  | SRR7297405  | GCA 015728465.1 | PDS000076886.1 |
| PDT000904301.1 | SAMN09401031  | SAMN09401031  | SRR7296958  | GCA 015715365.1 | PDS000076889.1 |
| PDT000904662.1 | SAMN09401093  | SAMN09401093  | SRR7296954  | GCA 015728805.1 | PDS000076889.1 |
| PDT000904621.1 | SAMN10435794  | SAMN10435794  | SRR8199670  | GCA 015727965.1 | PDS000076895.1 |
| PDT000904630.1 | SAMN10435785  | SAMN10435785  | SRR8199067  | GCA 015728145.1 | PDS000076895.1 |
| PDT000904453.1 | SAMN13622098  | SAMN13622098  | SRR10728144 | GCA 015724545.1 | PDS000076887.1 |
| PDT000904560.1 | SAMN11285088  | SAMN11285088  | SRR8810068  | GCA 015726685.1 | PDS000076887.1 |
| PDT000904623.1 | SAMN10435793  | SAMN10435793  | SRR8199673  | GCA 015728025.1 | PDS000076892.1 |
| PDT000904624.1 | SAMN10435792  | SAMN10435792  | SRR8199672  | GCA 015728035.1 | PDS000076892.1 |
| PDT000904312.1 | SAMN09401021  | SAMN09401021  | SRR7297572  | GCA 015715585.1 | PDS000076893.1 |
| PDT000904365.1 | SAMN09400962  | SAMN09400962  | SRR7296980  | GCA 015716645.1 | PDS000076893.1 |
| PDT000791376.2 | SAMEA70322668 | SAMEA70322668 | ERR2525376  | GCA 903811115.1 | PDS000069295.2 |
| PDT000791385.2 | SAMEA70329418 | SAMEA70329418 | ERR2525385  | GCA 903811205.1 | PDS000069295.2 |
| PDT000791389.2 | SAMEA70332418 | SAMEA70332418 | ERR2525389  | GCA 903811245.1 | PDS000069295.2 |
| PDT000791393.2 | SAMEA70335418 | SAMEA70335418 | ERR2525393  | GCA 903811285.1 | PDS000069295.2 |
| PDT000804920.2 | SAMEA6125776  | SAMEA6125776  | ERR3623709  | GCA 903987045.1 | PDS000069295.2 |
| PDT000804921.2 | SAMEA6125784  | SAMEA6125784  | ERR3623710  | GCA 903987055.1 | PDS000069295.2 |
| PDT000804922.2 | SAMEA6125778  | SAMEA6125778  | ERR3623711  | GCA 903987065.1 | PDS000069295.2 |
| PDT000804923.2 | SAMEA6125753  | SAMEA6125753  | ERR3623621  | GCA 903987075.1 | PDS000069295.2 |
| PDT000804924.2 | SAMEA6125743  | SAMEA6125743  | ERR3623611  | GCA 903987145.1 | PDS000069295.2 |
| PDT000804925.2 | SAMEA6125742  | SAMEA6125742  | ERR3623609  | GCA 903987175.1 | PDS000069295.2 |
| PDT000804926.2 | SAMEA6125751  | SAMEA6125751  | ERR3623619  | GCA 903987105.1 | PDS000069295.2 |
| PDT000804927.2 | SAMEA6125740  | SAMEA6125740  | ERR3623606  | GCA 903987165.1 | PDS000069295.2 |
| PDT000804928.2 | SAMEA6125741  | SAMEA6125741  | ERR3623610  | GCA 903987115.1 | PDS000069295.2 |
| PDT000804929.2 | SAMEA6125757  | SAMEA6125757  | ERR3623614  | GCA 903987155.1 | PDS000069295.2 |
| PDT000804930.2 | SAMEA6125755  | SAMEA6125755  | ERR3623618  | GCA 903987135.1 | PDS000069295.2 |
| PDT000804931.2 | SAMEA6125760  | SAMEA6125760  | ERR3623627  | GCA 903987085.1 | PDS000069295.2 |
| PDT000804932.2 | SAMEA6125763  | SAMEA6125763  | ERR3623612  | GCA 903987095.1 | PDS000069295.2 |
| PDT000804933.2 | SAMEA6125759  | SAMEA6125759  | ERR3623624  | GCA 903987225.1 | PDS000069295.2 |
| PDT000804934.2 | SAMEA6125749  | SAMEA6125749  | ERR3623617  | GCA 903987205.1 | PDS000069295.2 |
| PDT000804935.2 | SAMEA6125754  | SAMEA6125754  | ERR3623622  | GCA 903987195.1 | PDS000069295.2 |
| PDT000804936.2 | SAMEA6125750  | SAMEA6125750  | ERR3623613  | GCA 903987215.1 | PDS000069295.2 |
| PDT000804937.2 | SAMEA6125745  | SAMEA6125745  | ERR3623608  | GCA 903987185.1 | PDS000069295.2 |
| PDT000804938.2 | SAMEA6125746  | SAMEA6125746  | ERR3623616  | GCA 903987255.1 | PDS000069295.2 |
| PDT000804939.2 | SAMEA6125752  | SAMEA6125752  | ERR3623620  | GCA 903987245.1 | PDS000069295.2 |
| PDT000804940.2 | SAMEA6125747  | SAMEA6125747  | ERR3623615  | GCA 903987235.1 | PDS000069295.2 |
| PDT000804941.2 | SAMEA6125744  | SAMEA6125744  | ERR3623607  | GCA 903987265.1 | PDS000069295.2 |
| PDT000804942.2 | SAMEA6125762  | SAMEA6125762  | ERR3623630  | GCA 903987275.1 | PDS000069295.2 |
| PDT000804943.2 | SAMEA6125765  | SAMEA6125765  | ERR3623629  | GCA 903987285.1 | PDS000069295.2 |
| PDT000804945.2 | SAMEA6125761  | SAMEA6125761  | ERR3623628  | GCA 903987305.1 | PDS000069295.2 |

|                |              |              |            |                 |                |
|----------------|--------------|--------------|------------|-----------------|----------------|
| PDT000804947.2 | SAMEA6125774 | SAMEA6125774 | ERR3623707 | GCA 903987345.1 | PDS000069295.2 |
| PDT000804948.2 | SAMEA6125758 | SAMEA6125758 | ERR3623626 | GCA 903987395.1 | PDS000069295.2 |
| PDT000804950.2 | SAMEA6125764 | SAMEA6125764 | ERR3623696 | GCA 903987365.1 | PDS000069295.2 |
| PDT000804952.2 | SAMEA6125773 | SAMEA6125773 | ERR3623706 | GCA 903987335.1 | PDS000069295.2 |
| PDT000804953.2 | SAMEA6125771 | SAMEA6125771 | ERR3623703 | GCA 903987315.1 | PDS000069295.2 |
| PDT000804954.2 | SAMEA6125766 | SAMEA6125766 | ERR3623700 | GCA 903987415.1 | PDS000069295.2 |
| PDT000804955.2 | SAMEA6125768 | SAMEA6125768 | ERR3623701 | GCA 903987385.1 | PDS000069295.2 |
| PDT000804956.2 | SAMEA6125772 | SAMEA6125772 | ERR3623704 | GCA 903987405.1 | PDS000069295.2 |
| PDT000804957.2 | SAMEA6125775 | SAMEA6125775 | ERR3623699 | GCA 903987435.1 | PDS000069295.2 |
| PDT000804958.2 | SAMEA6125769 | SAMEA6125769 | ERR3623702 | GCA 903987425.1 | PDS000069295.2 |
| PDT000804960.2 | SAMEA6125767 | SAMEA6125767 | ERR3623698 | GCA 903987445.1 | PDS000069295.2 |
| PDT000804961.2 | SAMEA6125779 | SAMEA6125779 | ERR3623705 | GCA 903987465.1 | PDS000069295.2 |
| PDT000805008.2 | SAMEA6125816 | SAMEA6125816 | ERR3623697 | GCA 903987945.1 | PDS000069295.2 |
| PDT000805035.2 | SAMEA6125725 | SAMEA6125725 | ERR3623588 | GCA 903988205.1 | PDS000069295.2 |
| PDT000805038.2 | SAMEA6125732 | SAMEA6125732 | ERR3623602 | GCA 903988235.1 | PDS000069295.2 |
| PDT000805040.2 | SAMEA6125944 | SAMEA6125944 | ERR3623883 | GCA 903988255.1 | PDS000069295.2 |
| PDT000805041.2 | SAMEA6125943 | SAMEA6125943 | ERR3623880 | GCA 903988265.1 | PDS000069295.2 |
| PDT000805044.2 | SAMEA6125946 | SAMEA6125946 | ERR3623882 | GCA 903988295.1 | PDS000069295.2 |
| PDT000805045.2 | SAMEA6125949 | SAMEA6125949 | ERR3623884 | GCA 903988315.1 | PDS000069295.2 |
| PDT000805046.2 | SAMEA6125955 | SAMEA6125955 | ERR3623893 | GCA 903988305.1 | PDS000069295.2 |
| PDT000805047.2 | SAMEA6125942 | SAMEA6125942 | ERR3623879 | GCA 903988325.1 | PDS000069295.2 |
| PDT000805048.2 | SAMEA6125957 | SAMEA6125957 | ERR3623896 | GCA 903988365.1 | PDS000069295.2 |
| PDT000805050.2 | SAMEA6125958 | SAMEA6125958 | ERR3623895 | GCA 903988355.1 | PDS000069295.2 |
| PDT000805051.2 | SAMEA6125953 | SAMEA6125953 | ERR3623891 | GCA 903988345.1 | PDS000069295.2 |
| PDT000805052.2 | SAMEA6125954 | SAMEA6125954 | ERR3623892 | GCA 903988405.1 | PDS000069295.2 |
| PDT000805053.2 | SAMEA6125969 | SAMEA6125969 | ERR3623888 | GCA 903988385.1 | PDS000069295.2 |
| PDT000805054.2 | SAMEA6125951 | SAMEA6125951 | ERR3623886 | GCA 903988375.1 | PDS000069295.2 |
| PDT000805055.2 | SAMEA6125952 | SAMEA6125952 | ERR3623889 | GCA 903988395.1 | PDS000069295.2 |
| PDT000805056.2 | SAMEA6125963 | SAMEA6125963 | ERR3623898 | GCA 903988415.1 | PDS000069295.2 |
| PDT000805057.2 | SAMEA6125967 | SAMEA6125967 | ERR3623900 | GCA 903988445.1 | PDS000069295.2 |
| PDT000805060.2 | SAMEA6125959 | SAMEA6125959 | ERR3623878 | GCA 903988475.1 | PDS000069295.2 |
| PDT000805063.2 | SAMEA6125965 | SAMEA6125965 | ERR3623901 | GCA 903988455.1 | PDS000069295.2 |
| PDT000805064.2 | SAMEA6125950 | SAMEA6125950 | ERR3623885 | GCA 903988495.1 | PDS000069295.2 |
| PDT000805066.2 | SAMEA6125962 | SAMEA6125962 | ERR3623894 | GCA 903988505.1 | PDS000069295.2 |
| PDT000805070.2 | SAMEA6125790 | SAMEA6125790 | ERR3623724 | GCA 903988535.1 | PDS000069295.2 |
| PDT000805073.2 | SAMEA6125960 | SAMEA6125960 | ERR3623897 | GCA 903988565.1 | PDS000069295.2 |
| PDT000805075.2 | SAMEA6125968 | SAMEA6125968 | ERR3623899 | GCA 903988585.1 | PDS000069295.2 |
| PDT000805081.2 | SAMEA6125712 | SAMEA6125712 | ERR3623584 | GCA 903988645.1 | PDS000069295.2 |
| PDT000805084.2 | SAMEA6125713 | SAMEA6125713 | ERR3623585 | GCA 903988605.1 | PDS000069295.2 |
| PDT000805086.2 | SAMEA6125721 | SAMEA6125721 | ERR3623587 | GCA 903988725.1 | PDS000069295.2 |
| PDT000805089.2 | SAMEA6125720 | SAMEA6125720 | ERR3623591 | GCA 903988735.1 | PDS000069295.2 |
| PDT000805090.2 | SAMEA6125717 | SAMEA6125717 | ERR3623590 | GCA 903988745.1 | PDS000069295.2 |
| PDT000805091.2 | SAMEA6125718 | SAMEA6125718 | ERR3623586 | GCA 903988765.1 | PDS000069295.2 |
| PDT000805093.2 | SAMEA6125723 | SAMEA6125723 | ERR3623596 | GCA 903988785.1 | PDS000069295.2 |
| PDT000805094.2 | SAMEA6125726 | SAMEA6125726 | ERR3623593 | GCA 903988775.1 | PDS000069295.2 |
| PDT000805095.2 | SAMEA6125728 | SAMEA6125728 | ERR3623599 | GCA 903988805.1 | PDS000069295.2 |
| PDT000805097.2 | SAMEA6125734 | SAMEA6125734 | ERR3623598 | GCA 903988795.1 | PDS000069295.2 |
| PDT000805099.2 | SAMEA6125722 | SAMEA6125722 | ERR3623597 | GCA 903988825.1 | PDS000069295.2 |
| PDT000805102.2 | SAMEA6125730 | SAMEA6125730 | ERR3623600 | GCA 903988885.1 | PDS000069295.2 |
| PDT000805103.2 | SAMEA6125727 | SAMEA6125727 | ERR3623595 | GCA 903988855.1 | PDS000069295.2 |
| PDT000805104.2 | SAMEA6125794 | SAMEA6125794 | ERR3623728 | GCA 903988845.1 | PDS000069295.2 |
| PDT000805107.2 | SAMEA6125729 | SAMEA6125729 | ERR3623601 | GCA 903988915.1 | PDS000069295.2 |
| PDT000805109.2 | SAMEA6125719 | SAMEA6125719 | ERR3623589 | GCA 903988925.1 | PDS000069295.2 |
| PDT000805119.2 | SAMEA6125805 | SAMEA6125805 | ERR3623740 | GCA 903989045.1 | PDS000069295.2 |
| PDT000805120.2 | SAMEA6125724 | SAMEA6125724 | ERR3623594 | GCA 903989055.1 | PDS000069295.2 |
| PDT000805122.2 | SAMEA6125819 | SAMEA6125819 | ERR3623748 | GCA 903989065.1 | PDS000069295.2 |
| PDT000805130.2 | SAMEA6125828 | SAMEA6125828 | ERR3623760 | GCA 903989155.1 | PDS000069295.2 |
| PDT000805140.2 | SAMEA6125956 | SAMEA6125956 | ERR3623890 | GCA 903989275.1 | PDS000069295.2 |
| PDT000805141.2 | SAMEA6125964 | SAMEA6125964 | ERR3623902 | GCA 903989235.1 | PDS000069295.2 |
| PDT000805153.2 | SAMEA6125829 | SAMEA6125829 | ERR3623763 | GCA 903989365.1 | PDS000069295.2 |
| PDT000805155.2 | SAMEA6125945 | SAMEA6125945 | ERR3623881 | GCA 903989395.1 | PDS000069295.2 |
| PDT000805158.2 | SAMEA6125820 | SAMEA6125820 | ERR3623759 | GCA 903989425.1 | PDS000069295.2 |
| PDT000805192.2 | SAMEA5886200 | SAMEA5886200 | ERR3498902 | GCA 903989635.1 | PDS000069295.2 |
| PDT000805193.2 | SAMEA5886144 | SAMEA5886144 | ERR3495010 | GCA 903989615.1 | PDS000069295.2 |
| PDT000805195.2 | SAMEA5886148 | SAMEA5886148 | ERR3497191 | GCA 903989605.1 | PDS000069295.2 |
| PDT000805197.2 | SAMEA5886140 | SAMEA5886140 | ERR3495006 | GCA 903989575.1 | PDS000069295.2 |
| PDT000805198.2 | SAMEA5886149 | SAMEA5886149 | ERR3495009 | GCA 903989645.1 | PDS000069295.2 |
| PDT000805199.2 | SAMEA5886208 | SAMEA5886208 | ERR3498903 | GCA 903989655.1 | PDS000069295.2 |

|                |              |              |            |                 |                |
|----------------|--------------|--------------|------------|-----------------|----------------|
| PDT000805200.2 | SAMEA5886137 | SAMEA5886137 | ERR3494983 | GCA 903989715.1 | PDS000069295.2 |
| PDT000805201.2 | SAMEA5886134 | SAMEA5886134 | ERR3494980 | GCA 903989705.1 | PDS000069295.2 |
| PDT000805202.2 | SAMEA5886150 | SAMEA5886150 | ERR3497192 | GCA 903989755.1 | PDS000069295.2 |
| PDT000805203.2 | SAMEA5886142 | SAMEA5886142 | ERR3494985 | GCA 903989695.1 | PDS000069295.2 |
| PDT000805204.2 | SAMEA5886153 | SAMEA5886153 | ERR3497201 | GCA 903989685.1 | PDS000069295.2 |
| PDT000805205.2 | SAMEA5886136 | SAMEA5886136 | ERR3494981 | GCA 903989745.1 | PDS000069295.2 |
| PDT000805206.2 | SAMEA5886152 | SAMEA5886152 | ERR3497190 | GCA 903989725.1 | PDS000069295.2 |
| PDT000805207.2 | SAMEA5886143 | SAMEA5886143 | ERR3494982 | GCA 903989675.1 | PDS000069295.2 |
| PDT000805208.2 | SAMEA5886145 | SAMEA5886145 | ERR3494986 | GCA 903989765.1 | PDS000069295.2 |
| PDT000805209.2 | SAMEA5886147 | SAMEA5886147 | ERR3495008 | GCA 903989665.1 | PDS000069295.2 |
| PDT000805210.2 | SAMEA5886154 | SAMEA5886154 | ERR3497202 | GCA 903989825.1 | PDS000069295.2 |
| PDT000805211.2 | SAMEA5886164 | SAMEA5886164 | ERR3497773 | GCA 903989875.1 | PDS000069295.2 |
| PDT000805212.2 | SAMEA5886172 | SAMEA5886172 | ERR3497777 | GCA 903989785.1 | PDS000069295.2 |
| PDT000805213.2 | SAMEA5886185 | SAMEA5886185 | ERR3497786 | GCA 903989835.1 | PDS000069295.2 |
| PDT000805214.2 | SAMEA5886161 | SAMEA5886161 | ERR3497778 | GCA 903989775.1 | PDS000069295.2 |
| PDT000805216.2 | SAMEA5886211 | SAMEA5886211 | ERR3498905 | GCA 903989905.1 | PDS000069295.2 |
| PDT000805217.2 | SAMEA5886167 | SAMEA5886167 | ERR3497784 | GCA 903989855.1 | PDS000069295.2 |
| PDT000805219.2 | SAMEA5886165 | SAMEA5886165 | ERR3497772 | GCA 903989795.1 | PDS000069295.2 |
| PDT000805220.2 | SAMEA5886180 | SAMEA5886180 | ERR3497780 | GCA 903989895.1 | PDS000069295.2 |
| PDT000805221.2 | SAMEA5886158 | SAMEA5886158 | ERR3497293 | GCA 903989845.1 | PDS000069295.2 |
| PDT000805222.2 | SAMEA5886212 | SAMEA5886212 | ERR3498904 | GCA 903989815.1 | PDS000069295.2 |
| PDT000805223.2 | SAMEA5886157 | SAMEA5886157 | ERR3497291 | GCA 903989885.1 | PDS000069295.2 |
| PDT000805224.2 | SAMEA5886170 | SAMEA5886170 | ERR3497788 | GCA 903989955.1 | PDS000069295.2 |
| PDT000805225.2 | SAMEA5886160 | SAMEA5886160 | ERR3497771 | GCA 903989935.1 | PDS000069295.2 |
| PDT000805226.2 | SAMEA5886163 | SAMEA5886163 | ERR3497779 | GCA 903989925.1 | PDS000069295.2 |
| PDT000805227.2 | SAMEA5886151 | SAMEA5886151 | ERR3497203 | GCA 903989945.1 | PDS000069295.2 |
| PDT000805228.2 | SAMEA5886166 | SAMEA5886166 | ERR3497782 | GCA 903989965.1 | PDS000069295.2 |
| PDT000805229.2 | SAMEA5886195 | SAMEA5886195 | ERR3498227 | GCA 903990025.1 | PDS000069295.2 |
| PDT000805230.2 | SAMEA5886179 | SAMEA5886179 | ERR3498169 | GCA 903990005.1 | PDS000069295.2 |
| PDT000805231.2 | SAMEA5886215 | SAMEA5886215 | ERR3498906 | GCA 903990015.1 | PDS000069295.2 |
| PDT000805232.2 | SAMEA5886178 | SAMEA5886178 | ERR3497790 | GCA 903989985.1 | PDS000069295.2 |
| PDT000805233.2 | SAMEA5886173 | SAMEA5886173 | ERR3497914 | GCA 903989995.1 | PDS000069295.2 |
| PDT000805234.2 | SAMEA5886192 | SAMEA5886192 | ERR3498228 | GCA 903990035.1 | PDS000069295.2 |
| PDT000805235.2 | SAMEA5886183 | SAMEA5886183 | ERR3498229 | GCA 903990065.1 | PDS000069295.2 |
| PDT000805236.2 | SAMEA5886182 | SAMEA5886182 | ERR3498230 | GCA 903990145.1 | PDS000069295.2 |
| PDT000805237.2 | SAMEA5886231 | SAMEA5886231 | ERR3498907 | GCA 903990115.1 | PDS000069295.2 |
| PDT000805239.2 | SAMEA5886169 | SAMEA5886169 | ERR3497789 | GCA 903990055.1 | PDS000069295.2 |
| PDT000805240.2 | SAMEA5886177 | SAMEA5886177 | ERR3497918 | GCA 903990045.1 | PDS000069295.2 |
| PDT000805241.2 | SAMEA5886168 | SAMEA5886168 | ERR3497785 | GCA 903990075.1 | PDS000069295.2 |
| PDT000805242.2 | SAMEA5886175 | SAMEA5886175 | ERR3497917 | GCA 903990095.1 | PDS000069295.2 |
| PDT000805243.2 | SAMEA5886186 | SAMEA5886186 | ERR3498233 | GCA 903990135.1 | PDS000069295.2 |
| PDT000805244.2 | SAMEA5886184 | SAMEA5886184 | ERR3497913 | GCA 903990125.1 | PDS000069295.2 |
| PDT000805245.2 | SAMEA5886174 | SAMEA5886174 | ERR3497795 | GCA 903990105.1 | PDS000069295.2 |
| PDT000805246.2 | SAMEA5886181 | SAMEA5886181 | ERR3497916 | GCA 903990085.1 | PDS000069295.2 |
| PDT000805247.2 | SAMEA5886176 | SAMEA5886176 | ERR3497915 | GCA 903990155.1 | PDS000069295.2 |
| PDT000805248.2 | SAMEA5886189 | SAMEA5886189 | ERR3498232 | GCA 903990165.1 | PDS000069295.2 |
| PDT000805249.2 | SAMEA5886196 | SAMEA5886196 | ERR3498231 | GCA 903990175.1 | PDS000069295.2 |
| PDT000805250.2 | SAMEA5886197 | SAMEA5886197 | ERR3498244 | GCA 903990185.1 | PDS000069295.2 |
| PDT000805252.2 | SAMEA5886218 | SAMEA5886218 | ERR3498908 | GCA 903990255.1 | PDS000069295.2 |
| PDT000805253.2 | SAMEA5886203 | SAMEA5886203 | ERR3498246 | GCA 903990225.1 | PDS000069295.2 |
| PDT000805254.2 | SAMEA5886191 | SAMEA5886191 | ERR3498236 | GCA 903990285.1 | PDS000069295.2 |
| PDT000805255.2 | SAMEA5886199 | SAMEA5886199 | ERR3498241 | GCA 903990205.1 | PDS000069295.2 |
| PDT000805256.2 | SAMEA5886204 | SAMEA5886204 | ERR3498242 | GCA 903990195.1 | PDS000069295.2 |
| PDT000805257.2 | SAMEA5886202 | SAMEA5886202 | ERR3498243 | GCA 903990245.1 | PDS000069295.2 |
| PDT000805258.2 | SAMEA5886207 | SAMEA5886207 | ERR3498909 | GCA 903990215.1 | PDS000069295.2 |
| PDT000805260.2 | SAMEA5886193 | SAMEA5886193 | ERR3498239 | GCA 903990235.1 | PDS000069295.2 |
| PDT000805261.2 | SAMEA5886205 | SAMEA5886205 | ERR3498240 | GCA 903990275.1 | PDS000069295.2 |
| PDT000805262.2 | SAMEA5886198 | SAMEA5886198 | ERR3498245 | GCA 903990315.1 | PDS000069295.2 |
| PDT000805263.2 | SAMEA5886206 | SAMEA5886206 | ERR3498238 | GCA 903990295.1 | PDS000069295.2 |
| PDT000805264.2 | SAMEA5886194 | SAMEA5886194 | ERR3498237 | GCA 903990305.1 | PDS000069295.2 |
| PDT000805265.2 | SAMEA5886188 | SAMEA5886188 | ERR3498234 | GCA 903990335.1 | PDS000069295.2 |
| PDT000805267.2 | SAMEA5886201 | SAMEA5886201 | ERR3498901 | GCA 903990355.1 | PDS000069295.2 |
| PDT000805268.2 | SAMEA5886227 | SAMEA5886227 | ERR3498925 | GCA 903990385.1 | PDS000069295.2 |
| PDT000805269.2 | SAMEA5886217 | SAMEA5886217 | ERR3498912 | GCA 903990345.1 | PDS000069295.2 |
| PDT000805270.2 | SAMEA5886213 | SAMEA5886213 | ERR3498913 | GCA 903990375.1 | PDS000069295.2 |
| PDT000805271.2 | SAMEA5886209 | SAMEA5886209 | ERR3498911 | GCA 903990365.1 | PDS000069295.2 |
| PDT000805272.2 | SAMEA5886223 | SAMEA5886223 | ERR3498922 | GCA 903990455.1 | PDS000069295.2 |
| PDT000805273.2 | SAMEA5886210 | SAMEA5886210 | ERR3498910 | GCA 903990465.1 | PDS000069295.2 |



|                |              |              |            |                 |                |
|----------------|--------------|--------------|------------|-----------------|----------------|
| PDT000805274.2 | SAMEA5886225 | SAMEA5886225 | ERR3498921 | GCA 903990435.1 | PDS000069295.2 |
| PDT000805275.2 | SAMEA5886222 | SAMEA5886222 | ERR3498918 | GCA 903990415.1 | PDS000069295.2 |
| PDT000805276.2 | SAMEA5886224 | SAMEA5886224 | ERR3498917 | GCA 903990495.1 | PDS000069295.2 |
| PDT000805277.2 | SAMEA5886226 | SAMEA5886226 | ERR3498923 | GCA 903990395.1 | PDS000069295.2 |
| PDT000805278.2 | SAMEA5886220 | SAMEA5886220 | ERR3498915 | GCA 903990485.1 | PDS000069295.2 |
| PDT000805279.2 | SAMEA5886233 | SAMEA5886233 | ERR3498926 | GCA 903990525.1 | PDS000069295.2 |
| PDT000805280.2 | SAMEA5886221 | SAMEA5886221 | ERR3498914 | GCA 903990535.1 | PDS000069295.2 |
| PDT000805281.2 | SAMEA5886214 | SAMEA5886214 | ERR3498916 | GCA 903990505.1 | PDS000069295.2 |
| PDT000805282.2 | SAMEA5886216 | SAMEA5886216 | ERR3498924 | GCA 903990515.1 | PDS000069295.2 |
| PDT000805283.2 | SAMEA5886228 | SAMEA5886228 | ERR3498927 | GCA 903990545.1 | PDS000069295.2 |
| PDT000805284.2 | SAMEA5886230 | SAMEA5886230 | ERR3498928 | GCA 903990555.1 | PDS000069295.2 |
| PDT000805285.2 | SAMEA5886250 | SAMEA5886250 | ERR3498941 | GCA 903990565.1 | PDS000069295.2 |
| PDT000805286.2 | SAMEA5886237 | SAMEA5886237 | ERR3498943 | GCA 903990585.1 | PDS000069295.2 |
| PDT000805287.2 | SAMEA5886238 | SAMEA5886238 | ERR3498946 | GCA 903990595.1 | PDS000069295.2 |
| PDT000805288.2 | SAMEA5886239 | SAMEA5886239 | ERR3498945 | GCA 903990625.1 | PDS000069295.2 |
| PDT000805289.2 | SAMEA5886241 | SAMEA5886241 | ERR3498948 | GCA 903990685.1 | PDS000069295.2 |
| PDT000805290.2 | SAMEA5886242 | SAMEA5886242 | ERR3498949 | GCA 903990645.1 | PDS000069295.2 |
| PDT000805291.2 | SAMEA5886232 | SAMEA5886232 | ERR3498929 | GCA 903990615.1 | PDS000069295.2 |
| PDT000805292.2 | SAMEA5886246 | SAMEA5886246 | ERR3498952 | GCA 903990635.1 | PDS000069295.2 |
| PDT000805293.2 | SAMEA5886240 | SAMEA5886240 | ERR3498933 | GCA 903990605.1 | PDS000069295.2 |
| PDT000805294.2 | SAMEA5886236 | SAMEA5886236 | ERR3498932 | GCA 903990675.1 | PDS000069295.2 |
| PDT000805295.2 | SAMEA5886234 | SAMEA5886234 | ERR3498942 | GCA 903990665.1 | PDS000069295.2 |
| PDT000805296.2 | SAMEA5886243 | SAMEA5886243 | ERR3498950 | GCA 903990695.1 | PDS000069295.2 |
| PDT000805297.2 | SAMEA5886245 | SAMEA5886245 | ERR3498937 | GCA 903990705.1 | PDS000069295.2 |
| PDT000805298.2 | SAMEA5886249 | SAMEA5886249 | ERR3498947 | GCA 903990725.1 | PDS000069295.2 |
| PDT000805299.2 | SAMEA5886235 | SAMEA5886235 | ERR3498944 | GCA 903990735.1 | PDS000069295.2 |
| PDT000805300.2 | SAMEA5886252 | SAMEA5886252 | ERR3498940 | GCA 903990715.1 | PDS000069295.2 |
| PDT000805303.2 | SAMEA5886247 | SAMEA5886247 | ERR3498951 | GCA 903990755.1 | PDS000069295.2 |
| PDT000805304.2 | SAMEA5886251 | SAMEA5886251 | ERR3498954 | GCA 903990765.1 | PDS000069295.2 |
| PDT000805305.2 | SAMEA5886033 | SAMEA5886033 | ERR3493916 | GCA 903990775.1 | PDS000069295.2 |
| PDT000805306.2 | SAMEA5886038 | SAMEA5886038 | ERR3494289 | GCA 903990785.1 | PDS000069295.2 |
| PDT000805307.2 | SAMEA5886034 | SAMEA5886034 | ERR3494346 | GCA 903990795.1 | PDS000069295.2 |
| PDT000805308.2 | SAMEA5886253 | SAMEA5886253 | ERR3498958 | GCA 903990805.1 | PDS000069295.2 |
| PDT000805309.2 | SAMEA5886039 | SAMEA5886039 | ERR3493914 | GCA 903990815.1 | PDS000069295.2 |
| PDT000805310.2 | SAMEA5886258 | SAMEA5886258 | ERR3498956 | GCA 903990825.1 | PDS000069295.2 |
| PDT000805311.2 | SAMEA5886255 | SAMEA5886255 | ERR3498973 | GCA 903990845.1 | PDS000069295.2 |
| PDT000805312.2 | SAMEA5886035 | SAMEA5886035 | ERR3494326 | GCA 903990915.1 | PDS000069295.2 |
| PDT000805313.2 | SAMEA5886256 | SAMEA5886256 | ERR3498972 | GCA 903990895.1 | PDS000069295.2 |
| PDT000805314.2 | SAMEA5886042 | SAMEA5886042 | ERR3494327 | GCA 903990855.1 | PDS000069295.2 |
| PDT000805316.2 | SAMEA5886257 | SAMEA5886257 | ERR3498971 | GCA 903990925.1 | PDS000069295.2 |
| PDT000805317.2 | SAMEA5886259 | SAMEA5886259 | ERR3498957 | GCA 903990835.1 | PDS000069295.2 |
| PDT000805318.2 | SAMEA5886244 | SAMEA5886244 | ERR3498955 | GCA 903990865.1 | PDS000069295.2 |
| PDT000805319.2 | SAMEA5886036 | SAMEA5886036 | ERR3493915 | GCA 903990905.1 | PDS000069295.2 |
| PDT000805320.2 | SAMEA5886254 | SAMEA5886254 | ERR3498970 | GCA 903990885.1 | PDS000069295.2 |
| PDT000805321.2 | SAMEA5886037 | SAMEA5886037 | ERR3494348 | GCA 903990935.1 | PDS000069295.2 |
| PDT000805322.2 | SAMEA5886040 | SAMEA5886040 | ERR3494349 | GCA 903990955.1 | PDS000069295.2 |
| PDT000805323.2 | SAMEA5886056 | SAMEA5886056 | ERR3494351 | GCA 903990945.1 | PDS000069295.2 |
| PDT000805324.2 | SAMEA5886045 | SAMEA5886045 | ERR3494350 | GCA 903990965.1 | PDS000069295.2 |
| PDT000805325.2 | SAMEA5886043 | SAMEA5886043 | ERR3494352 | GCA 903990975.1 | PDS000069295.2 |
| PDT000805326.2 | SAMEA5886044 | SAMEA5886044 | ERR3494353 | GCA 903990995.1 | PDS000069295.2 |
| PDT000805327.2 | SAMEA5886048 | SAMEA5886048 | ERR3494355 | GCA 903991005.1 | PDS000069295.2 |
| PDT000805328.2 | SAMEA5886051 | SAMEA5886051 | ERR3494354 | GCA 903990985.1 | PDS000069295.2 |
| PDT000805329.2 | SAMEA5886046 | SAMEA5886046 | ERR3494357 | GCA 903991025.1 | PDS000069295.2 |
| PDT000805330.2 | SAMEA5886047 | SAMEA5886047 | ERR3494358 | GCA 903991035.1 | PDS000069295.2 |
| PDT000805331.2 | SAMEA5886054 | SAMEA5886054 | ERR3494356 | GCA 903991045.1 | PDS000069295.2 |
| PDT000805332.2 | SAMEA5886049 | SAMEA5886049 | ERR3494360 | GCA 903991055.1 | PDS000069295.2 |
| PDT000805333.2 | SAMEA5886059 | SAMEA5886059 | ERR3494369 | GCA 903991065.1 | PDS000069295.2 |
| PDT000805334.2 | SAMEA5886061 | SAMEA5886061 | ERR3494366 | GCA 903991075.1 | PDS000069295.2 |
| PDT000805335.2 | SAMEA5886050 | SAMEA5886050 | ERR3494362 | GCA 903991085.1 | PDS000069295.2 |
| PDT000805336.2 | SAMEA5886070 | SAMEA5886070 | ERR3494370 | GCA 903991095.1 | PDS000069295.2 |
| PDT000805337.2 | SAMEA5886053 | SAMEA5886053 | ERR3494359 | GCA 903991125.1 | PDS000069295.2 |
| PDT000805338.2 | SAMEA5886066 | SAMEA5886066 | ERR3494368 | GCA 903991115.1 | PDS000069295.2 |
| PDT000805339.2 | SAMEA5886074 | SAMEA5886074 | ERR3494365 | GCA 903991105.1 | PDS000069295.2 |
| PDT000805340.2 | SAMEA5886055 | SAMEA5886055 | ERR3494361 | GCA 903991145.1 | PDS000069295.2 |
| PDT000805341.2 | SAMEA5886057 | SAMEA5886057 | ERR3494367 | GCA 903991135.1 | PDS000069295.2 |
| PDT000805342.2 | SAMEA5886052 | SAMEA5886052 | ERR3494363 | GCA 903991155.1 | PDS000069295.2 |
| PDT000805343.2 | SAMEA5886067 | SAMEA5886067 | ERR3494614 | GCA 903991185.1 | PDS000069295.2 |
| PDT000805344.2 | SAMEA5886072 | SAMEA5886072 | ERR3494616 | GCA 903991175.1 | PDS000069295.2 |

|                |              |              |            |                 |                |
|----------------|--------------|--------------|------------|-----------------|----------------|
| PDT000805345.2 | SAMEA5886058 | SAMEA5886058 | ERR3494371 | GCA 903991165.1 | PDS000069295.2 |
| PDT000805346.2 | SAMEA5886060 | SAMEA5886060 | ERR3494613 | GCA 903991195.1 | PDS000069295.2 |
| PDT000805347.2 | SAMEA5886062 | SAMEA5886062 | ERR3494615 | GCA 903991205.1 | PDS000069295.2 |
| PDT000805348.2 | SAMEA5886065 | SAMEA5886065 | ERR3494618 | GCA 903991215.1 | PDS000069295.2 |
| PDT000805349.2 | SAMEA5886076 | SAMEA5886076 | ERR3494788 | GCA 903991285.1 | PDS000069295.2 |
| PDT000805350.2 | SAMEA5886064 | SAMEA5886064 | ERR3494619 | GCA 903991225.1 | PDS000069295.2 |
| PDT000805351.2 | SAMEA5886063 | SAMEA5886063 | ERR3494617 | GCA 903991235.1 | PDS000069295.2 |
| PDT000805352.2 | SAMEA5886068 | SAMEA5886068 | ERR3494778 | GCA 903991275.1 | PDS000069295.2 |
| PDT000805353.2 | SAMEA5886079 | SAMEA5886079 | ERR3494787 | GCA 903991255.1 | PDS000069295.2 |
| PDT000805354.2 | SAMEA5886073 | SAMEA5886073 | ERR3494779 | GCA 903991265.1 | PDS000069295.2 |
| PDT000805355.2 | SAMEA5886077 | SAMEA5886077 | ERR3494781 | GCA 903991245.1 | PDS000069295.2 |
| PDT000805356.2 | SAMEA5886078 | SAMEA5886078 | ERR3494789 | GCA 903991295.1 | PDS000069295.2 |
| PDT000805358.2 | SAMEA5886071 | SAMEA5886071 | ERR3494780 | GCA 903991305.1 | PDS000069295.2 |
| PDT000805359.2 | SAMEA5886069 | SAMEA5886069 | ERR3494777 | GCA 903991315.1 | PDS000069295.2 |
| PDT000805360.2 | SAMEA5886081 | SAMEA5886081 | ERR3494796 | GCA 903991335.1 | PDS000069295.2 |
| PDT000805361.2 | SAMEA5886083 | SAMEA5886083 | ERR3494791 | GCA 903991365.1 | PDS000069295.2 |
| PDT000805362.2 | SAMEA5886187 | SAMEA5886187 | ERR3498170 | GCA 903991345.1 | PDS000069295.2 |
| PDT000805363.2 | SAMEA5886085 | SAMEA5886085 | ERR3494793 | GCA 903991355.1 | PDS000069295.2 |
| PDT000805364.2 | SAMEA5886082 | SAMEA5886082 | ERR3494794 | GCA 903991325.1 | PDS000069295.2 |
| PDT000805365.2 | SAMEA5886075 | SAMEA5886075 | ERR3494790 | GCA 903991385.1 | PDS000069295.2 |
| PDT000805366.2 | SAMEA5886097 | SAMEA5886097 | ERR3494792 | GCA 903991375.1 | PDS000069295.2 |
| PDT000805367.2 | SAMEA5886080 | SAMEA5886080 | ERR3494795 | GCA 903991415.1 | PDS000069295.2 |
| PDT000805368.2 | SAMEA5886089 | SAMEA5886089 | ERR3494798 | GCA 903991405.1 | PDS000069295.2 |
| PDT000805369.2 | SAMEA5886093 | SAMEA5886093 | ERR3494797 | GCA 903991395.1 | PDS000069295.2 |
| PDT000805370.2 | SAMEA5886086 | SAMEA5886086 | ERR3494800 | GCA 903991435.1 | PDS000069295.2 |
| PDT000805371.2 | SAMEA5886084 | SAMEA5886084 | ERR3494799 | GCA 903991425.1 | PDS000069295.2 |
| PDT000805372.2 | SAMEA5886096 | SAMEA5886096 | ERR3494807 | GCA 903991505.1 | PDS000069295.2 |
| PDT000805373.2 | SAMEA5886100 | SAMEA5886100 | ERR3494838 | GCA 903991485.1 | PDS000069295.2 |
| PDT000805374.2 | SAMEA5886095 | SAMEA5886095 | ERR3494805 | GCA 903991495.1 | PDS000069295.2 |
| PDT000805375.2 | SAMEA5886092 | SAMEA5886092 | ERR3494810 | GCA 903991475.1 | PDS000069295.2 |
| PDT000805376.2 | SAMEA5886113 | SAMEA5886113 | ERR3494839 | GCA 903991455.1 | PDS000069295.2 |
| PDT000805377.2 | SAMEA5886087 | SAMEA5886087 | ERR3494802 | GCA 903991465.1 | PDS000069295.2 |
| PDT000805378.2 | SAMEA5886099 | SAMEA5886099 | ERR3494844 | GCA 903991445.1 | PDS000069295.2 |
| PDT000805379.2 | SAMEA5886098 | SAMEA5886098 | ERR3494811 | GCA 903991535.1 | PDS000069295.2 |
| PDT000805380.2 | SAMEA5886103 | SAMEA5886103 | ERR3494808 | GCA 903991525.1 | PDS000069295.2 |
| PDT000805381.2 | SAMEA5886104 | SAMEA5886104 | ERR3494845 | GCA 903991515.1 | PDS000069295.2 |
| PDT000805382.2 | SAMEA5886094 | SAMEA5886094 | ERR3494803 | GCA 903991545.1 | PDS000069295.2 |
| PDT000805383.2 | SAMEA5886102 | SAMEA5886102 | ERR3494842 | GCA 903991585.1 | PDS000069295.2 |
| PDT000805384.2 | SAMEA5886091 | SAMEA5886091 | ERR3494804 | GCA 903991635.1 | PDS000069295.2 |
| PDT000805385.2 | SAMEA5886107 | SAMEA5886107 | ERR3494843 | GCA 903991555.1 | PDS000069295.2 |
| PDT000805386.2 | SAMEA5886101 | SAMEA5886101 | ERR3494809 | GCA 903991565.1 | PDS000069295.2 |
| PDT000805387.2 | SAMEA5886105 | SAMEA5886105 | ERR3494847 | GCA 903991595.1 | PDS000069295.2 |
| PDT000805388.2 | SAMEA5886088 | SAMEA5886088 | ERR3494801 | GCA 903991625.1 | PDS000069295.2 |
| PDT000805389.2 | SAMEA5886090 | SAMEA5886090 | ERR3494806 | GCA 903991615.1 | PDS000069295.2 |
| PDT000805390.2 | SAMEA5886109 | SAMEA5886109 | ERR3494846 | GCA 903991605.1 | PDS000069295.2 |
| PDT000805391.2 | SAMEA5886106 | SAMEA5886106 | ERR3494840 | GCA 903991575.1 | PDS000069295.2 |
| PDT000805392.2 | SAMEA5886112 | SAMEA5886112 | ERR3494852 | GCA 903991665.1 | PDS000069295.2 |
| PDT000805393.2 | SAMEA5886114 | SAMEA5886114 | ERR3494855 | GCA 903991645.1 | PDS000069295.2 |
| PDT000805394.2 | SAMEA5886116 | SAMEA5886116 | ERR3494851 | GCA 903991685.1 | PDS000069295.2 |
| PDT000805395.2 | SAMEA5886126 | SAMEA5886126 | ERR3494853 | GCA 903991675.1 | PDS000069295.2 |
| PDT000805396.2 | SAMEA5886111 | SAMEA5886111 | ERR3494849 | GCA 903991695.1 | PDS000069295.2 |
| PDT000805397.2 | SAMEA5886108 | SAMEA5886108 | ERR3494850 | GCA 903991655.1 | PDS000069295.2 |
| PDT000805398.2 | SAMEA5886119 | SAMEA5886119 | ERR3494854 | GCA 903991705.1 | PDS000069295.2 |
| PDT000805399.2 | SAMEA5886110 | SAMEA5886110 | ERR3494848 | GCA 903991715.1 | PDS000069295.2 |
| PDT000805400.2 | SAMEA5886129 | SAMEA5886129 | ERR3494929 | GCA 903991725.1 | PDS000069295.2 |
| PDT000805402.2 | SAMEA5886128 | SAMEA5886128 | ERR3494928 | GCA 903991775.1 | PDS000069295.2 |
| PDT000805403.2 | SAMEA5886121 | SAMEA5886121 | ERR3494934 | GCA 903991815.1 | PDS000069295.2 |
| PDT000805404.2 | SAMEA5886123 | SAMEA5886123 | ERR3494936 | GCA 903991765.1 | PDS000069295.2 |
| PDT000805405.2 | SAMEA5886122 | SAMEA5886122 | ERR3494931 | GCA 903991785.1 | PDS000069295.2 |
| PDT000805406.2 | SAMEA5886120 | SAMEA5886120 | ERR3494925 | GCA 903991745.1 | PDS000069295.2 |
| PDT000805407.2 | SAMEA5886118 | SAMEA5886118 | ERR3494930 | GCA 903991805.1 | PDS000069295.2 |
| PDT000805408.2 | SAMEA5886135 | SAMEA5886135 | ERR3494933 | GCA 903991755.1 | PDS000069295.2 |
| PDT000805409.2 | SAMEA5886156 | SAMEA5886156 | ERR3494937 | GCA 903991735.1 | PDS000069295.2 |
| PDT000805410.2 | SAMEA5886117 | SAMEA5886117 | ERR3494927 | GCA 903991825.1 | PDS000069295.2 |
| PDT000805411.2 | SAMEA5886125 | SAMEA5886125 | ERR3494926 | GCA 903991835.1 | PDS000069295.2 |
| PDT000805412.2 | SAMEA5886124 | SAMEA5886124 | ERR3494935 | GCA 903991885.1 | PDS000069295.2 |
| PDT000805413.2 | SAMEA5886146 | SAMEA5886146 | ERR3494938 | GCA 903991875.1 | PDS000069295.2 |
| PDT000805414.2 | SAMEA5886130 | SAMEA5886130 | ERR3494939 | GCA 903991845.1 | PDS000069295.2 |

|                |              |              |             |                 |                |
|----------------|--------------|--------------|-------------|-----------------|----------------|
| PDT000805415.2 | SAMEA5886131 | SAMEA5886131 | ERR3494941  | GCA 903991865.1 | PDS000069295.2 |
| PDT000805416.2 | SAMEA5886127 | SAMEA5886127 | ERR3494940  | GCA 903991905.1 | PDS000069295.2 |
| PDT000805815.2 | SAMEA6125739 | SAMEA6125739 | ERR3623745  | GCA 903994005.1 | PDS000069295.2 |
| PDT000805816.2 | SAMEA6125733 | SAMEA6125733 | ERR3623592  | GCA 903993995.1 | PDS000069295.2 |
| PDT000897346.1 | SAMEA6125780 | SAMEA6125780 | ERR3623715  | GCA 905071935.1 | PDS000069295.2 |
| PDT000383745.2 | SAMN09989512 | SAMN09989512 | SRR7825588  | GCA 003581465.1 | PDS000067987.1 |
| PDT000383746.2 | SAMN09989513 | SAMN09989513 | SRR7825595  | GCA 003581455.1 | PDS000067987.1 |
| PDT000383748.2 | SAMN09989511 | SAMN09989511 | SRR7825587  | GCA 003581505.1 | PDS000067987.1 |
| PDT000383843.2 | SAMN09989507 | SAMN09989507 | SRR7825591  | GCA 003583845.1 | PDS000067987.1 |
| PDT000108581.1 | SAMN03359309 | SAMN03359309 | SRR1814496  | GCA 015619785.1 | PDS000067790.1 |
| PDT000108616.1 | SAMN03359344 | SAMN03359344 | SRR1814531  | GCA 015617525.1 | PDS000067790.1 |
| PDT000108707.1 | SAMN03359436 | SAMN03359436 | SRR1814623  | GCA 015616865.1 | PDS000067790.1 |
| PDT000681809.2 | SAMEA2076784 | SAMEA2076784 | ERR517387   | GCA 902722775.1 | PDS000069796.1 |
| PDT000681815.2 | SAMEA2077051 | SAMEA2077051 | ERR360277   | GCA 902722875.1 | PDS000069796.1 |
| PDT000681816.2 | SAMEA2080349 | SAMEA2080349 | ERR496845   | GCA 902722865.1 | PDS000069796.1 |
| PDT000681817.2 | SAMEA2077056 | SAMEA2077056 | ERR360286   | GCA 902722855.1 | PDS000069796.1 |
| PDT000681818.2 | SAMEA2077050 | SAMEA2077050 | ERR360275   | GCA 902722845.1 | PDS000069796.1 |
| PDT000681819.2 | SAMEA2080347 | SAMEA2080347 | ERR360279   | GCA 902722825.1 | PDS000069796.1 |
| PDT000681820.2 | SAMEA2077055 | SAMEA2077055 | ERR360284   | GCA 902722925.1 | PDS000069796.1 |
| PDT000681821.2 | SAMEA2080348 | SAMEA2080348 | ERR360282   | GCA 902722795.1 | PDS000069796.1 |
| PDT000681822.2 | SAMEA2080345 | SAMEA2080345 | ERR353329   | GCA 902722805.1 | PDS000069796.1 |
| PDT000681824.2 | SAMEA2077057 | SAMEA2077057 | ERR360287   | GCA 902722815.1 | PDS000069796.1 |
| PDT000681826.2 | SAMEA2080346 | SAMEA2080346 | ERR496836   | GCA 902722885.1 | PDS000069796.1 |
| PDT000681827.2 | SAMEA2077052 | SAMEA2077052 | ERR360278   | GCA 902722905.1 | PDS000069796.1 |
| PDT000681828.2 | SAMEA2077049 | SAMEA2077049 | ERR360274   | GCA 902722935.1 | PDS000069796.1 |
| PDT000681830.2 | SAMEA2077053 | SAMEA2077053 | ERR496841   | GCA 902722945.1 | PDS000069796.1 |
| PDT000681831.2 | SAMEA1964723 | SAMEA1964723 | ERR360280   | GCA 902722955.1 | PDS000069796.1 |
| PDT000681832.2 | SAMEA2077048 | SAMEA2077048 | ERR517397   | GCA 902722965.1 | PDS000069796.1 |
| PDT000681833.2 | SAMEA2077054 | SAMEA2077054 | ERR360283   | GCA 902722975.1 | PDS000069796.1 |
| PDT000108575.1 | SAMN03359303 | SAMN03359303 | SRR1814490  | GCA 015619425.1 | PDS000069552.1 |
| PDT000108613.1 | SAMN03359341 | SAMN03359341 | SRR1814528  | GCA 015618415.1 | PDS000069552.1 |
| PDT000108770.1 | SAMN03359499 | SAMN03359499 | SRR1814686  | GCA 015615655.1 | PDS000069552.1 |
| PDT000108804.1 | SAMN03359533 | SAMN03359533 | SRR1814720  | GCA 015616005.1 | PDS000069552.1 |
| PDT000578266.2 | SAMN12618719 | SAMN12618719 | SRR10015261 | GCA 008123345.1 | PDS000068216.1 |
| PDT000578267.2 | SAMN12618723 | SAMN12618723 | SRR10015257 | GCA 008123355.1 | PDS000068216.1 |
| PDT000578273.2 | SAMN12618715 | SAMN12618715 | SRR10015265 | GCA 008123575.1 | PDS000068216.1 |
| PDT000578274.2 | SAMN12618710 | SAMN12618710 | SRR10015253 | GCA 008123595.1 | PDS000068216.1 |
| PDT000578275.2 | SAMN12618712 | SAMN12618712 | SRR10015251 | GCA 008123625.1 | PDS000068216.1 |
| PDT000578276.2 | SAMN12618717 | SAMN12618717 | SRR10015263 | GCA 008123635.1 | PDS000068216.1 |
| PDT000578277.2 | SAMN12618713 | SAMN12618713 | SRR10015250 | GCA 008123655.1 | PDS000068216.1 |
| PDT000578278.2 | SAMN12618711 | SAMN12618711 | SRR10015252 | GCA 008123665.1 | PDS000068216.1 |
| PDT000578279.2 | SAMN12618708 | SAMN12618708 | SRR10015255 | GCA 008123695.1 | PDS000068216.1 |
| PDT000578281.2 | SAMN12618709 | SAMN12618709 | SRR10015254 | GCA 008123735.1 | PDS000068216.1 |
| PDT000578282.2 | SAMN12618716 | SAMN12618716 | SRR10015264 | GCA 008123765.1 | PDS000068216.1 |
| PDT000578283.2 | SAMN12618714 | SAMN12618714 | SRR10015249 | GCA 008123775.1 | PDS000068216.1 |
| PDT000578284.2 | SAMN12618718 | SAMN12618718 | SRR10015262 | GCA 008123805.1 | PDS000068216.1 |
| PDT000578285.2 | SAMN12618720 | SAMN12618720 | SRR10015260 | GCA 008123815.1 | PDS000068216.1 |
| PDT000578286.2 | SAMN12618721 | SAMN12618721 | SRR10015259 | GCA 008123845.1 | PDS000068216.1 |
| PDT000578287.2 | SAMN12618722 | SAMN12618722 | SRR10015258 | GCA 008123865.1 | PDS000068216.1 |
| PDT000813662.1 | SAMN12776172 | SAMN12776172 | SRR10179094 | GCA 009457615.1 | PDS000072899.1 |
| PDT000852697.1 | SAMN12642231 | SAMN12642231 | SRR11016227 | GCA 014832355.1 | PDS000072899.1 |
| PDT000852734.1 | SAMN12642204 | SAMN12642204 | SRR11016197 | GCA 014835405.1 | PDS000072899.1 |
| PDT000852745.1 | SAMN12642187 | SAMN12642187 | SRR11016215 | GCA 014835655.1 | PDS000072899.1 |
| PDT000852746.1 | SAMN12642186 | SAMN12642186 | SRR11016216 | GCA 014835675.1 | PDS000072899.1 |
| PDT000852748.1 | SAMN12642183 | SAMN12642183 | SRR11016220 | GCA 014835715.1 | PDS000072899.1 |
| PDT000852749.1 | SAMN12642182 | SAMN12642182 | SRR11016221 | GCA 014835725.1 | PDS000072899.1 |
| PDT000852750.1 | SAMN12642180 | SAMN12642180 | SRR11016223 | GCA 014835755.1 | PDS000072899.1 |
| PDT000852751.1 | SAMN12642181 | SAMN12642181 | SRR11016222 | GCA 014835765.1 | PDS000072899.1 |
| PDT000852752.1 | SAMN12642178 | SAMN12642178 | SRR11016225 | GCA 014835775.1 | PDS000072899.1 |
| PDT000852773.1 | SAMN12642155 | SAMN12642155 | SRR11016308 | GCA 014836215.1 | PDS000072899.1 |
| PDT000904286.1 | SAMN09401046 | SAMN09401046 | SRR7297392  | GCA 015715065.1 | PDS000076909.1 |
| PDT000904314.1 | SAMN09401017 | SAMN09401017 | SRR7297246  | GCA 015715625.1 | PDS000076909.1 |
| PDT000904362.1 | SAMN09400965 | SAMN09400965 | SRR7296983  | GCA 015716585.1 | PDS000076909.1 |
| PDT000904366.1 | SAMN09400961 | SAMN09400961 | SRR7296979  | GCA 015716665.1 | PDS000076909.1 |
| PDT000904368.1 | SAMN09400958 | SAMN09400958 | SRR7297590  | GCA 015716685.1 | PDS000076909.1 |
| PDT000904373.1 | SAMN09400951 | SAMN09400951 | SRR7297585  | GCA 015716805.1 | PDS000076909.1 |
| PDT000904374.1 | SAMN09400954 | SAMN09400954 | SRR7297586  | GCA 015716825.1 | PDS000076909.1 |
| PDT000904392.1 | SAMN09400933 | SAMN09400933 | SRR7297536  | GCA 015717185.1 | PDS000076909.1 |

|                |               |               |             |                 |                |
|----------------|---------------|---------------|-------------|-----------------|----------------|
| PDT000904406.1 | SAMN09400907  | SAMN09400907  | SRR7296847  | GCA 015717465.1 | PDS000076909.1 |
| PDT000904432.1 | SAMN09400894  | SAMN09400894  | SRR7297256  | GCA 015717985.1 | PDS000076909.1 |
| PDT000904575.1 | SAMN11285072  | SAMN11285072  | SRR8810188  | GCA 015727065.1 | PDS000076909.1 |
| PDT000108837.1 | SAMN03359566  | SAMN03359566  | SRR1814753  | GCA 015613565.1 | PDS000070008.1 |
| PDT000108839.1 | SAMN03359568  | SAMN03359568  | SRR1814755  | GCA 015613585.1 | PDS000070008.1 |
| PDT000108846.1 | SAMN03359575  | SAMN03359575  | SRR1814762  | GCA 015613405.1 | PDS000070008.1 |
| PDT000108847.1 | SAMN03359576  | SAMN03359576  | SRR1814763  | GCA 015615365.1 | PDS000070008.1 |
| PDT000108848.1 | SAMN03359577  | SAMN03359577  | SRR1814764  | GCA 015613425.1 | PDS000070008.1 |
| PDT000108849.1 | SAMN03359578  | SAMN03359578  | SRR1814765  | GCA 015615345.1 | PDS000070008.1 |
| PDT000108850.1 | SAMN03359579  | SAMN03359579  | SRR1814766  | GCA 015615305.1 | PDS000070008.1 |
| PDT000108851.1 | SAMN03359580  | SAMN03359580  | SRR1814767  | GCA 015615265.1 | PDS000070008.1 |
| PDT000108853.1 | SAMN03359582  | SAMN03359582  | SRR1814769  | GCA 015613385.1 | PDS000070008.1 |
| PDT000108855.1 | SAMN03359584  | SAMN03359584  | SRR1814771  | GCA 015612865.1 | PDS000070008.1 |
| PDT000108856.1 | SAMN03359585  | SAMN03359585  | SRR1814772  | GCA 015613365.1 | PDS000070008.1 |
| PDT000822049.1 | SAMN07674857  | SAMN07674857  | SRR6053641  | GCA 015545455.1 | PDS000070374.1 |
| PDT000822050.1 | SAMN07674856  | SAMN07674856  | SRR6053642  | GCA 015545515.1 | PDS000070374.1 |
| PDT000822051.1 | SAMN07674859  | SAMN07674859  | SRR6053643  | GCA 015545475.1 | PDS000070374.1 |
| PDT000822052.1 | SAMN07674858  | SAMN07674858  | SRR6053644  | GCA 015545395.1 | PDS000070374.1 |
| PDT000822053.1 | SAMN07674863  | SAMN07674863  | SRR6053645  | GCA 015545495.1 | PDS000070374.1 |
| PDT000822054.1 | SAMN07674860  | SAMN07674860  | SRR6053646  | GCA 015545355.1 | PDS000070374.1 |
| PDT000822055.1 | SAMN07674864  | SAMN07674864  | SRR6053647  | GCA 015545375.1 | PDS000070374.1 |
| PDT000822056.1 | SAMN07674861  | SAMN07674861  | SRR6053648  | GCA 015545425.1 | PDS000070374.1 |
| PDT000822060.1 | SAMN07674865  | SAMN07674865  | SRR6053652  | GCA 015545215.1 | PDS000070374.1 |
| PDT000822061.1 | SAMN07674866  | SAMN07674866  | SRR6053653  | GCA 015545235.1 | PDS000070374.1 |
| PDT000822119.1 | SAMN07674862  | SAMN07674862  | SRR6053711  | GCA 015544095.1 | PDS000070374.1 |
| PDT000871173.1 | SAMN15541364  | SAMN15541364  | SRR12233426 | GCA 015541025.1 | PDS000074415.2 |
| PDT000871174.1 | SAMN15541363  | SAMN15541363  | SRR12233427 | GCA 015541405.1 | PDS000074415.2 |
| PDT000871177.1 | SAMN15541360  | SAMN15541360  | SRR12233430 | GCA 015540985.1 | PDS000074415.2 |
| PDT000871190.1 | SAMN15541348  | SAMN15541348  | SRR12233443 | GCA 015541865.1 | PDS000074415.2 |
| PDT000871201.1 | SAMN15541338  | SAMN15541338  | SRR12233454 | GCA 015541585.1 | PDS000074415.2 |
| PDT000871202.1 | SAMN15541337  | SAMN15541337  | SRR12233455 | GCA 015541545.1 | PDS000074415.2 |
| PDT000871210.1 | SAMN15541336  | SAMN15541336  | SRR12233463 | GCA 015541505.1 | PDS000074415.2 |
| PDT000871244.1 | SAMN15541333  | SAMN15541333  | SRR12233497 | GCA 015541525.1 | PDS000074415.2 |
| PDT000108710.1 | SAMN03359439  | SAMN03359439  | SRR1814626  | GCA 015616845.1 | PDS000067770.1 |
| PDT000904299.1 | SAMN09401035  | SAMN09401035  | SRR7296962  | GCA 015715325.1 | PDS000076932.1 |
| PDT000904486.1 | SAMN12220531  | SAMN12220531  | SRR9647397  | GCA 015725205.1 | PDS000076932.1 |
| PDT000904511.1 | SAMN12220505  | SAMN12220505  | SRR9647370  | GCA 015725705.1 | PDS000076932.1 |
| PDT000904564.1 | SAMN11285087  | SAMN11285087  | SRR8810459  | GCA 015726775.1 | PDS000076932.1 |
| PDT000904577.1 | SAMN11285071  | SAMN11285071  | SRR8810455  | GCA 015727085.1 | PDS000076932.1 |
| PDT000904594.1 | SAMN11285054  | SAMN11285054  | SRR8810262  | GCA 015727445.1 | PDS000076932.1 |
| PDT000904663.1 | SAMN09401092  | SAMN09401092  | SRR7296978  | GCA 015728825.1 | PDS000076932.1 |
| PDT000904664.1 | SAMN09401091  | SAMN09401091  | SRR7296976  | GCA 015728835.1 | PDS000076932.1 |
| PDT000444202.1 | SAMEA53018668 | SAMEA53018668 | ERR2506126  | GCA 015605025.1 | PDS000067841.1 |
| PDT000444218.1 | SAMEA53031418 | SAMEA53031418 | ERR2506142  | GCA 015606285.1 | PDS000067841.1 |
| PDT000444237.1 | SAMEA53046418 | SAMEA53046418 | ERR2506161  | GCA 015606105.1 | PDS000067841.1 |
| PDT000444240.1 | SAMEA53048668 | SAMEA53048668 | ERR2506164  | GCA 015605965.1 | PDS000067841.1 |
| PDT000444242.1 | SAMEA53050168 | SAMEA53050168 | ERR2506166  | GCA 015605865.1 | PDS000067841.1 |
| PDT000444264.1 | SAMEA53067418 | SAMEA53067418 | ERR2506188  | GCA 015605485.1 | PDS000067841.1 |
| PDT000444265.1 | SAMEA53068168 | SAMEA53068168 | ERR2506189  | GCA 015605565.1 | PDS000067841.1 |
| PDT000444197.1 | SAMEA53014918 | SAMEA53014918 | ERR2506121  | GCA 015605075.1 | PDS000067845.1 |
| PDT000444203.1 | SAMEA53019418 | SAMEA53019418 | ERR2506127  | GCA 015605065.1 | PDS000067845.1 |
| PDT000444204.1 | SAMEA53020168 | SAMEA53020168 | ERR2506128  | GCA 015604905.1 | PDS000067845.1 |
| PDT000444230.1 | SAMEA53041168 | SAMEA53041168 | ERR2506154  | GCA 015606025.1 | PDS000067845.1 |
| PDT000444232.1 | SAMEA53042668 | SAMEA53042668 | ERR2506156  | GCA 015606125.1 | PDS000067845.1 |
| PDT000444236.1 | SAMEA53045668 | SAMEA53045668 | ERR2506160  | GCA 015606085.1 | PDS000067845.1 |
| PDT000444246.1 | SAMEA53053168 | SAMEA53053168 | ERR2506170  | GCA 015605925.1 | PDS000067845.1 |
| PDT000670139.2 | SAMEA1029525  | SAMEA1029525  | ERR064954   | GCA 902715315.1 | PDS000069811.1 |
| PDT000670142.2 | SAMEA1029553  | SAMEA1029553  | ERR064957   | GCA 902715275.1 | PDS000069811.1 |
| PDT000670145.2 | SAMEA1029515  | SAMEA1029515  | ERR064955   | GCA 902715385.1 | PDS000069811.1 |
| PDT000670150.2 | SAMEA1029536  | SAMEA1029536  | ERR064958   | GCA 902715375.1 | PDS000069811.1 |
| PDT000670152.2 | SAMEA1029558  | SAMEA1029558  | ERR064959   | GCA 902715395.1 | PDS000069811.1 |
| PDT000670155.2 | SAMEA1029565  | SAMEA1029565  | ERR064956   | GCA 902715435.1 | PDS000069811.1 |
| PDT000681763.2 | SAMEA1965375  | SAMEA1965375  | ERR353268   | GCA 902722235.1 | PDS000069811.1 |
| PDT000116991.2 | SAMEA1464430  | SAMEA1464430  | ERR118483   | GCA 900054495.1 | PDS000069778.1 |
| PDT000117229.2 | SAMEA1469674  | SAMEA1469674  | ERR158799   | GCA 900045185.1 | PDS000069778.1 |
| PDT000118736.2 | SAMEA1469538  | SAMEA1469538  | ERR158803   | GCA 900049315.1 | PDS000069778.1 |
| PDT000118788.2 | SAMEA1464626  | SAMEA1464626  | ERR124502   | GCA 900043585.1 | PDS000069778.1 |
| PDT000119099.2 | SAMEA1317372  | SAMEA1317372  | ERR107937   | GCA 900040755.1 | PDS000069778.1 |

|                |              |              |             |                 |                |
|----------------|--------------|--------------|-------------|-----------------|----------------|
| PDT000119408.2 | SAMEA1317347 | SAMEA1317347 | ERR111104   | GCA 900041155.1 | PDS000069778.1 |
| PDT000119544.2 | SAMEA1469709 | SAMEA1469709 | ERR158631   | GCA 900018105.1 | PDS000069778.1 |
| PDT000070467.2 | SAMN03197114 | SAMN03197114 | SRR1655346  | GCA 001060415.1 | PDS000069610.1 |
| PDT000070479.2 | SAMN03197211 | SAMN03197211 | SRR1655443  | GCA 001060665.1 | PDS000069610.1 |
| PDT000070494.2 | SAMN03197061 | SAMN03197061 | SRR1655293  | GCA 001060985.1 | PDS000069610.1 |
| PDT000070500.2 | SAMN03197139 | SAMN03197139 | SRR1655371  | GCA 001061135.1 | PDS000069610.1 |
| PDT000070501.2 | SAMN03197112 | SAMN03197112 | SRR1655344  | GCA 001061155.1 | PDS000069610.1 |
| PDT000070540.2 | SAMN03197086 | SAMN03197086 | SRR1655318  | GCA 001062005.1 | PDS000069610.1 |
| PDT000070542.2 | SAMN03197111 | SAMN03197111 | SRR1655343  | GCA 001062075.1 | PDS000069610.1 |
| PDT000090338.2 | SAMEA1463335 | SAMEA1463335 | ERR144768   | GCA 001349395.1 | PDS000069385.1 |
| PDT000790646.2 | SAMEA4553095 | SAMEA4553095 | ERR1891826  | GCA 903805515.1 | PDS000069385.1 |
| PDT000790648.2 | SAMEA4553097 | SAMEA4553097 | ERR1891828  | GCA 903805535.1 | PDS000069385.1 |
| PDT000790649.2 | SAMEA4553098 | SAMEA4553098 | ERR1891829  | GCA 903805545.1 | PDS000069385.1 |
| PDT000790655.2 | SAMEA4553105 | SAMEA4553105 | ERR1891836  | GCA 903805605.1 | PDS000069385.1 |
| PDT000790656.2 | SAMEA4553106 | SAMEA4553106 | ERR1891837  | GCA 903805615.1 | PDS000069385.1 |
| PDT000790658.2 | SAMEA4553108 | SAMEA4553108 | ERR1891839  | GCA 903805635.1 | PDS000069385.1 |
| PDT000772752.2 | SAMEA4008490 | SAMEA4008490 | ERR1723870  | GCA 903798975.1 | PDS000069437.1 |
| PDT000772802.2 | SAMEA4008544 | SAMEA4008544 | ERR1723921  | GCA 903799505.1 | PDS000069437.1 |
| PDT000772803.2 | SAMEA4008545 | SAMEA4008545 | ERR1723922  | GCA 903799525.1 | PDS000069437.1 |
| PDT000772807.2 | SAMEA4008549 | SAMEA4008549 | ERR1723926  | GCA 903799485.1 | PDS000069437.1 |
| PDT000772811.2 | SAMEA4008553 | SAMEA4008553 | ERR1723930  | GCA 903799595.1 | PDS000069437.1 |
| PDT000772817.2 | SAMEA4008559 | SAMEA4008559 | ERR1723936  | GCA 903799655.1 | PDS000069437.1 |
| PDT000772818.2 | SAMEA4008560 | SAMEA4008560 | ERR1723937  | GCA 903799625.1 | PDS000069437.1 |
| PDT000078982.2 | SAMEA1466511 | SAMEA1466511 | ERR137971   | GCA 001194965.1 | PDS000069283.3 |
| PDT000079040.2 | SAMEA1466518 | SAMEA1466518 | ERR302806   | GCA 001196145.1 | PDS000069283.3 |
| PDT000079403.2 | SAMEA1324712 | SAMEA1324712 | ERR134815   | GCA 001203795.1 | PDS000069283.3 |
| PDT000079621.2 | SAMEA1466452 | SAMEA1466452 | ERR302814   | GCA 001208405.1 | PDS000069283.3 |
| PDT000852706.1 | SAMN12642225 | SAMN12642225 | SRR11016233 | GCA 014832525.1 | PDS000069283.3 |
| PDT000903150.1 | SAMN10689453 | SAMN10689453 | SRR8389035  | GCA 015713205.1 | PDS000069283.3 |
| PDT000078845.2 | SAMEA1710086 | SAMEA1710086 | ERR256876   | GCA 001192095.1 | PDS000069222.1 |
| PDT000079210.2 | SAMEA1324724 | SAMEA1324724 | ERR134638   | GCA 001199755.1 | PDS000069222.1 |
| PDT000079484.2 | SAMEA1324584 | SAMEA1324584 | ERR134855   | GCA 001205495.1 | PDS000069222.1 |
| PDT000079769.2 | SAMEA1324718 | SAMEA1324718 | ERR134637   | GCA 001211525.1 | PDS000069222.1 |
| PDT000079829.2 | SAMEA1324552 | SAMEA1324552 | ERR134837   | GCA 001212745.1 | PDS000069222.1 |
| PDT000090453.2 | SAMEA1324591 | SAMEA1324591 | ERR134645   | GCA 001352155.1 | PDS000069222.1 |
| PDT000078850.2 | SAMEA1324593 | SAMEA1324593 | ERR134813   | GCA 001192235.1 | PDS000069259.1 |
| PDT000079346.2 | SAMEA1710084 | SAMEA1710084 | ERR256874   | GCA 001202595.1 | PDS000069259.1 |
| PDT000090434.2 | SAMEA1324546 | SAMEA1324546 | ERR134793   | GCA 001351775.1 | PDS000069259.1 |
| PDT000090435.2 | SAMEA1324549 | SAMEA1324549 | ERR134807   | GCA 001351795.1 | PDS000069259.1 |
| PDT000090460.2 | SAMEA1324607 | SAMEA1324607 | ERR134812   | GCA 001352295.1 | PDS000069259.1 |
| PDT000090463.2 | SAMEA1324624 | SAMEA1324624 | ERR134786   | GCA 001352355.1 | PDS000069259.1 |
| PDT000079323.2 | SAMEA1466513 | SAMEA1466513 | ERR137932   | GCA 001202095.1 | PDS000069242.1 |
| PDT000079654.2 | SAMEA1466470 | SAMEA1466470 | ERR302769   | GCA 001209125.1 | PDS000069242.1 |
| PDT000090518.2 | SAMEA1466450 | SAMEA1466450 | ERR302775   | GCA 001353455.1 | PDS000069242.1 |
| PDT000090520.2 | SAMEA1466456 | SAMEA1466456 | ERR137918   | GCA 001353495.1 | PDS000069242.1 |
| PDT000090541.2 | SAMEA1466504 | SAMEA1466504 | ERR137928   | GCA 001353915.1 | PDS000069242.1 |
| PDT000090558.2 | SAMEA1466537 | SAMEA1466537 | ERR302753   | GCA 001354255.1 | PDS000069242.1 |
| PDT000804982.2 | SAMEA6125864 | SAMEA6125864 | ERR3623797  | GCA 903987675.1 | PDS000069183.1 |
| PDT000805033.2 | SAMEA6125891 | SAMEA6125891 | ERR3623814  | GCA 903988155.1 | PDS000069183.1 |
| PDT000805034.2 | SAMEA6125878 | SAMEA6125878 | ERR3623813  | GCA 903988175.1 | PDS000069183.1 |
| PDT000805039.2 | SAMEA6125880 | SAMEA6125880 | ERR3623817  | GCA 903988245.1 | PDS000069183.1 |
| PDT000805043.2 | SAMEA6125884 | SAMEA6125884 | ERR3623820  | GCA 903988285.1 | PDS000069183.1 |
| PDT000805074.2 | SAMEA6125885 | SAMEA6125885 | ERR3623819  | GCA 903988575.1 | PDS000069183.1 |
| PDT000116418.2 | SAMEA1464408 | SAMEA1464408 | ERR118503   | GCA 900054945.1 | PDS000069443.1 |
| PDT000116766.2 | SAMEA1464421 | SAMEA1464421 | ERR118505   | GCA 900042295.1 | PDS000069443.1 |
| PDT000116861.2 | SAMEA1469676 | SAMEA1469676 | ERR158654   | GCA 900040135.1 | PDS000069443.1 |
| PDT000117452.2 | SAMEA1469668 | SAMEA1469668 | ERR158651   | GCA 900037955.1 | PDS000069443.1 |
| PDT000117979.2 | SAMEA1464432 | SAMEA1464432 | ERR118417   | GCA 900059615.1 | PDS000069443.1 |
| PDT000772746.2 | SAMEA4008484 | SAMEA4008484 | ERR1723864  | GCA 903798905.1 | PDS000069443.1 |
| PDT000111974.2 | SAMEA1469619 | SAMEA1469619 | ERR158634   | GCA 900018115.1 | PDS000069391.1 |
| PDT000112064.2 | SAMEA1464551 | SAMEA1464551 | ERR129256   | GCA 900045005.1 | PDS000069391.1 |
| PDT000116817.2 | SAMEA1317348 | SAMEA1317348 | ERR107938   | GCA 900064585.1 | PDS000069391.1 |
| PDT000117415.2 | SAMEA1464342 | SAMEA1464342 | ERR118387   | GCA 900040235.1 | PDS000069391.1 |
| PDT000790622.2 | SAMEA4553071 | SAMEA4553071 | ERR1891802  | GCA 903805265.1 | PDS000069391.1 |
| PDT000790782.2 | SAMEA4553154 | SAMEA4553154 | ERR1891883  | GCA 903806035.1 | PDS000069391.1 |
| PDT000116962.2 | SAMEA1317326 | SAMEA1317326 | ERR107895   | GCA 900047185.1 | PDS000069351.1 |
| PDT000790953.2 | SAMEA4553242 | SAMEA4553242 | ERR3012778  | GCA 903806955.1 | PDS000069351.1 |
| PDT000790954.2 | SAMEA4553243 | SAMEA4553243 | ERR3012779  | GCA 903806965.1 | PDS000069351.1 |

|                |               |               |             |                 |                |
|----------------|---------------|---------------|-------------|-----------------|----------------|
| PDT000790955.2 | SAMEA4553244  | SAMEA4553244  | ERR3012780  | GCA 903806975.1 | PDS000069351.1 |
| PDT000790973.2 | SAMEA4553263  | SAMEA4553263  | ERR3012799  | GCA 903807155.1 | PDS000069351.1 |
| PDT000791007.2 | SAMEA4553297  | SAMEA4553297  | ERR3012833  | GCA 903807495.1 | PDS000069351.1 |
| PDT000790626.2 | SAMEA4553075  | SAMEA4553075  | ERR1891806  | GCA 903805315.1 | PDS000069388.1 |
| PDT000790670.2 | SAMEA4553116  | SAMEA4553116  | ERR1891847  | GCA 903805715.1 | PDS000069388.1 |
| PDT000790749.2 | SAMEA4553143  | SAMEA4553143  | ERR1891872  | GCA 903805945.1 | PDS000069388.1 |
| PDT000790787.2 | SAMEA4553155  | SAMEA4553155  | ERR1891884  | GCA 903806045.1 | PDS000069388.1 |
| PDT000790801.2 | SAMEA4553159  | SAMEA4553159  | ERR1891888  | GCA 903806085.1 | PDS000069388.1 |
| PDT000790811.2 | SAMEA4553162  | SAMEA4553162  | ERR1891891  | GCA 903806115.1 | PDS000069388.1 |
| PDT000813648.1 | SAMN12776185  | SAMN12776185  | SRR10179078 | GCA 009457325.1 | PDS000069162.2 |
| PDT000079303.2 | SAMEA1324755  | SAMEA1324755  | ERR134861   | GCA 001201695.1 | PDS000069093.2 |
| PDT000079657.2 | SAMEA1324741  | SAMEA1324741  | ERR134862   | GCA 001209185.1 | PDS000069093.2 |
| PDT000090531.2 | SAMEA1466487  | SAMEA1466487  | ERR302745   | GCA 001353715.1 | PDS000069093.2 |
| PDT000079421.2 | SAMEA1324673  | SAMEA1324673  | ERR134663   | GCA 001204195.1 | PDS000069227.1 |
| PDT000079466.2 | SAMEA1324517  | SAMEA1324517  | ERR134729   | GCA 001205135.1 | PDS000069227.1 |
| PDT000079647.2 | SAMEA1324523  | SAMEA1324523  | ERR134654   | GCA 001208965.1 | PDS000069227.1 |
| PDT000079804.2 | SAMEA1324538  | SAMEA1324538  | ERR134655   | GCA 001212245.1 | PDS000069227.1 |
| PDT000081039.2 | SAMEA1324573  | SAMEA1324573  | ERR134728   | GCA 001262375.1 | PDS000069227.1 |
| PDT000078950.2 | SAMEA1466460  | SAMEA1466460  | ERR302755   | GCA 001194285.1 | PDS000069224.1 |
| PDT000078958.2 | SAMEA1324681  | SAMEA1324681  | ERR134856   | GCA 001194465.1 | PDS000069224.1 |
| PDT000079719.2 | SAMEA1466451  | SAMEA1466451  | ERR338637   | GCA 001210425.1 | PDS000069224.1 |
| PDT000079825.2 | SAMEA1710080  | SAMEA1710080  | ERR256878   | GCA 001212665.1 | PDS000069224.1 |
| PDT000090484.2 | SAMEA1324696  | SAMEA1324696  | ERR134857   | GCA 001352775.1 | PDS000069224.1 |
| PDT000080120.2 | SAMEA1030187  | SAMEA1030187  | ERR044563   | GCA 001225705.1 | PDS000069208.1 |
| PDT000080196.2 | SAMEA1030288  | SAMEA1030288  | ERR044570   | GCA 001228085.1 | PDS000069208.1 |
| PDT000080271.2 | SAMEA1030330  | SAMEA1030330  | ERR044565   | GCA 001230765.1 | PDS000069208.1 |
| PDT000116029.2 | SAMEA1469683  | SAMEA1469683  | ERR158732   | GCA 900044605.1 | PDS000069208.1 |
| PDT000117966.2 | SAMEA1469716  | SAMEA1469716  | ERR158728   | GCA 900064245.1 | PDS000069208.1 |
| PDT000112235.2 | SAMEA1464404  | SAMEA1464404  | ERR118542   | GCA 900045615.1 | PDS000068404.1 |
| PDT000115871.2 | SAMEA1464307  | SAMEA1464307  | ERR118540   | GCA 900040095.1 | PDS000068404.1 |
| PDT000116259.2 | SAMEA1464573  | SAMEA1464573  | ERR118543   | GCA 900041885.1 | PDS000068404.1 |
| PDT000116635.2 | SAMEA1464415  | SAMEA1464415  | ERR118544   | GCA 900045625.1 | PDS000068404.1 |
| PDT000111984.2 | SAMEA1464347  | SAMEA1464347  | ERR129288   | GCA 900047365.1 | PDS000068427.1 |
| PDT000112251.2 | SAMEA1317473  | SAMEA1317473  | ERR111045   | GCA 900062785.1 | PDS000068427.1 |
| PDT000118106.2 | SAMEA1464670  | SAMEA1464670  | ERR118429   | GCA 900039095.1 | PDS000068427.1 |
| PDT000118819.2 | SAMEA1469614  | SAMEA1469614  | ERR158658   | GCA 900020395.1 | PDS000068427.1 |
| PDT000175315.2 | SAMEA4017532  | SAMEA4017532  | ERR1429005  | GCA 900088495.1 | PDS000069142.1 |
| PDT000175316.2 | SAMEA4017531  | SAMEA4017531  | ERR1429004  | GCA 900088505.1 | PDS000069142.1 |
| PDT000079803.2 | SAMEA1710091  | SAMEA1710091  | ERR256890   | GCA 001212225.1 | PDS000069228.1 |
| PDT000090528.2 | SAMEA1466476  | SAMEA1466476  | ERR302817   | GCA 001353655.1 | PDS000069228.1 |
| PDT000090529.2 | SAMEA1466483  | SAMEA1466483  | ERR302816   | GCA 001353675.1 | PDS000069228.1 |
| PDT000090540.2 | SAMEA1466503  | SAMEA1466503  | ERR137986   | GCA 001353895.1 | PDS000069228.1 |
| PDT000805080.2 | SAMEA6125664  | SAMEA6125664  | ERR3623538  | GCA 903988675.1 | PDS000069181.1 |
| PDT000805088.2 | SAMEA6125673  | SAMEA6125673  | ERR3623537  | GCA 903988625.1 | PDS000069181.1 |
| PDT000805101.2 | SAMEA6125670  | SAMEA6125670  | ERR3623534  | GCA 903988865.1 | PDS000069181.1 |
| PDT000805105.2 | SAMEA6125663  | SAMEA6125663  | ERR3623533  | GCA 903988905.1 | PDS000069181.1 |
| PDT000852708.1 | SAMN12642222  | SAMN12642222  | SRR11016237 | GCA 014832575.1 | PDS000072902.2 |
| PDT000852714.1 | SAMN12642217  | SAMN12642217  | SRR11016242 | GCA 014832685.1 | PDS000072902.2 |
| PDT000852715.1 | SAMN12642216  | SAMN12642216  | SRR11016243 | GCA 014832695.1 | PDS000072902.2 |
| PDT000904237.1 | SAMN10689401  | SAMN10689401  | SRR11016776 | GCA 015713905.1 | PDS000072902.2 |
| PDT000184804.1 | SAMEA24726418 | SAMEA24726418 | ERR1753462  | GCA 015611225.1 | PDS000068065.1 |
| PDT000184805.1 | SAMEA24727168 | SAMEA24727168 | ERR1753463  | GCA 015611205.1 | PDS000068065.1 |
| PDT000184806.1 | SAMEA24727918 | SAMEA24727918 | ERR1753464  | GCA 015611165.1 | PDS000068065.1 |
| PDT000184808.1 | SAMEA24729418 | SAMEA24729418 | ERR1753466  | GCA 015611145.1 | PDS000068064.1 |
| PDT000184809.1 | SAMEA24730168 | SAMEA24730168 | ERR1753467  | GCA 015611385.1 | PDS000068064.1 |
| PDT000184810.1 | SAMEA24730918 | SAMEA24730918 | ERR1753468  | GCA 015611185.1 | PDS000068064.1 |
| PDT000184795.1 | SAMEA24719668 | SAMEA24719668 | ERR1753453  | GCA 015611305.1 | PDS000068068.1 |
| PDT000184796.1 | SAMEA24720418 | SAMEA24720418 | ERR1753454  | GCA 015611345.1 | PDS000068068.1 |
| PDT000184797.1 | SAMEA24721168 | SAMEA24721168 | ERR1753455  | GCA 015611245.1 | PDS000068068.1 |
| PDT000184823.1 | SAMEA24740668 | SAMEA24740668 | ERR1753481  | GCA 015610895.1 | PDS000068057.1 |
| PDT000184824.1 | SAMEA24741418 | SAMEA24741418 | ERR1753482  | GCA 015610825.1 | PDS000068057.1 |
| PDT000184825.1 | SAMEA24742168 | SAMEA24742168 | ERR1753483  | GCA 015610785.1 | PDS000068057.1 |
| PDT000184826.1 | SAMEA24742918 | SAMEA24742918 | ERR1753484  | GCA 015610865.1 | PDS000068056.1 |
| PDT000184827.1 | SAMEA24743668 | SAMEA24743668 | ERR1753485  | GCA 015610805.1 | PDS000068056.1 |
| PDT000184828.1 | SAMEA24744418 | SAMEA24744418 | ERR1753486  | GCA 015610765.1 | PDS000068056.1 |
| PDT000184829.1 | SAMEA24745168 | SAMEA24745168 | ERR1753487  | GCA 015610695.1 | PDS000068055.1 |
| PDT000184830.1 | SAMEA24745918 | SAMEA24745918 | ERR1753488  | GCA 015610365.1 | PDS000068055.1 |
| PDT000184831.1 | SAMEA24746668 | SAMEA24746668 | ERR1753489  | GCA 015610485.1 | PDS000068055.1 |



|                |               |               |             |                 |                |
|----------------|---------------|---------------|-------------|-----------------|----------------|
| PDT000184839.1 | SAMEA24752668 | SAMEA24752668 | ERR1753497  | GCA 015610525.1 | PDS000068051.1 |
| PDT000184840.1 | SAMEA24753418 | SAMEA24753418 | ERR1753498  | GCA 015610185.1 | PDS000068051.1 |
| PDT000184841.1 | SAMEA24754168 | SAMEA24754168 | ERR1753499  | GCA 015610285.1 | PDS000068051.1 |
| PDT000184741.1 | SAMEA24679168 | SAMEA24679168 | ERR1753399  | GCA 015612085.1 | PDS000068058.1 |
| PDT000184742.1 | SAMEA24679918 | SAMEA24679918 | ERR1753400  | GCA 015611805.1 | PDS000068058.1 |
| PDT000184821.1 | SAMEA24739168 | SAMEA24739168 | ERR1753479  | GCA 015610885.1 | PDS000068058.1 |
| PDT000184812.1 | SAMEA24732418 | SAMEA24732418 | ERR1753470  | GCA 015611105.1 | PDS000068063.1 |
| PDT000184813.1 | SAMEA24733168 | SAMEA24733168 | ERR1753471  | GCA 015610925.1 | PDS000068063.1 |
| PDT000184814.1 | SAMEA24733918 | SAMEA24733918 | ERR1753472  | GCA 015610985.1 | PDS000068063.1 |
| PDT000766326.2 | SAMN14906864  | SAMN14906864  | SRR11787411 | GCA 013339105.1 | PDS000068722.1 |
| PDT000813735.1 | SAMN12776098  | SAMN12776098  | SRR10179133 | GCA 009459085.1 | PDS000068722.1 |
| PDT000813813.1 | SAMN12776020  | SAMN12776020  | SRR10179220 | GCA 009460645.1 | PDS000068722.1 |
| PDT000079057.2 | SAMEA1324676  | SAMEA1324676  | ERR134706   | GCA 001196515.1 | PDS000068737.1 |
| PDT000079576.2 | SAMEA1324529  | SAMEA1324529  | ERR134711   | GCA 001207455.1 | PDS000068737.1 |
| PDT000090506.2 | SAMEA1324751  | SAMEA1324751  | ERR134710   | GCA 001353215.1 | PDS000068737.1 |
| PDT000079661.2 | SAMEA1466481  | SAMEA1466481  | ERR138001   | GCA 001209265.1 | PDS000068715.1 |
| PDT000090510.2 | SAMEA1324760  | SAMEA1324760  | ERR134620   | GCA 001353295.1 | PDS000068715.1 |
| PDT000090566.2 | SAMEA1710100  | SAMEA1710100  | ERR249311   | GCA 001354415.1 | PDS000068715.1 |
| PDT000371240.2 | SAMD00083481  | SAMD00083481  | ERR107121   | GCA 003418735.1 | PDS000068699.1 |
| PDT000371310.2 | SAMD00083547  | SAMD00083547  | DRR107187   | GCA 003420505.1 | PDS000068699.1 |
| PDT000371331.2 | SAMD00083565  | SAMD00083565  | DRR107205   | GCA 003420965.1 | PDS000068699.1 |
| PDT000080496.2 | SAMEA1030282  | SAMEA1030282  | ERR044588   | GCA 001239005.1 | PDS000069273.1 |
| PDT000079390.2 | SAMEA1324708  | SAMEA1324708  | ERR134622   | GCA 001203535.1 | PDS000069258.1 |
| PDT000081031.2 | SAMEA1710096  | SAMEA1710096  | ERR249312   | GCA 001262215.1 | PDS000069258.1 |
| PDT000090445.2 | SAMEA1324567  | SAMEA1324567  | ERR134626   | GCA 001351995.1 | PDS000069258.1 |
| PDT000079276.2 | SAMEA1324766  | SAMEA1324766  | ERR134816   | GCA 001201135.1 | PDS000069261.1 |
| PDT000090507.2 | SAMEA1324752  | SAMEA1324752  | ERR134823   | GCA 001353235.1 | PDS000069261.1 |
| PDT000090515.2 | SAMEA1324771  | SAMEA1324771  | ERR134822   | GCA 001353395.1 | PDS000069261.1 |
| PDT000079435.2 | SAMEA1324623  | SAMEA1324623  | ERR134662   | GCA 001204475.1 | PDS000069253.1 |
| PDT000090432.2 | SAMEA1324542  | SAMEA1324542  | ERR134652   | GCA 001351735.1 | PDS000069253.1 |
| PDT000090458.2 | SAMEA1324604  | SAMEA1324604  | ERR134651   | GCA 001352255.1 | PDS000069253.1 |
| PDT000079013.2 | SAMEA1324615  | SAMEA1324615  | ERR134735   | GCA 001195585.1 | PDS000069276.1 |
| PDT000079203.2 | SAMEA1324761  | SAMEA1324761  | ERR134773   | GCA 001199615.1 | PDS000069276.1 |
| PDT000079566.2 | SAMEA1324699  | SAMEA1324699  | ERR134759   | GCA 001207235.1 | PDS000069276.1 |
| PDT000078985.2 | SAMEA1324772  | SAMEA1324772  | ERR134709   | GCA 001195025.1 | PDS000069235.1 |
| PDT000079741.2 | SAMEA1324687  | SAMEA1324687  | ERR134705   | GCA 001210885.1 | PDS000069235.1 |
| PDT000090490.2 | SAMEA1324709  | SAMEA1324709  | ERR134708   | GCA 001352895.1 | PDS000069235.1 |
| PDT000079513.2 | SAMEA1466506  | SAMEA1466506  | ERR302748   | GCA 001206115.1 | PDS000069249.1 |
| PDT000079546.2 | SAMEA1324657  | SAMEA1324657  | ERR134859   | GCA 001206795.1 | PDS000069249.1 |
| PDT000090477.2 | SAMEA1324670  | SAMEA1324670  | ERR134860   | GCA 001352635.1 | PDS000069249.1 |
| PDT000079034.2 | SAMEA1466494  | SAMEA1466494  | ERR302783   | GCA 001196025.1 | PDS000069252.1 |
| PDT000079457.2 | SAMEA1710087  | SAMEA1710087  | ERR256889   | GCA 001204955.1 | PDS000069252.1 |
| PDT000079777.2 | SAMEA1466480  | SAMEA1466480  | ERR137937   | GCA 001211685.1 | PDS000069252.1 |
| PDT000079041.2 | SAMEA1324738  | SAMEA1324738  | ERR134842   | GCA 001196165.1 | PDS000069230.1 |
| PDT000079790.2 | SAMEA1324574  | SAMEA1324574  | ERR134838   | GCA 001211965.1 | PDS000069230.1 |
| PDT000090473.2 | SAMEA1324658  | SAMEA1324658  | ERR134844   | GCA 001352555.1 | PDS000069230.1 |
| PDT000711846.2 | SAMN10875734  | SAMN10875734  | SRR11015938 | GCA 011319695.1 | PDS000069629.1 |
| PDT000722920.2 | SAMN10689348  | SAMN10689348  | SRR8389005  | GCA 012274745.1 | PDS000069629.1 |
| PDT000711842.2 | SAMN10875737  | SAMN10875737  | SRR11015935 | GCA 011319615.1 | PDS000069633.2 |
| PDT000722916.2 | SAMN10689370  | SAMN10689370  | SRR8389093  | GCA 012274665.1 | PDS000069633.2 |
| PDT000904260.1 | SAMN10689371  | SAMN10689371  | SRR8389092  | GCA 015714355.1 | PDS000069633.2 |
| PDT000711839.2 | SAMN10875741  | SAMN10875741  | SRR11015931 | GCA 011319565.1 | PDS000069637.2 |
| PDT000722912.2 | SAMN10689389  | SAMN10689389  | SRR8389066  | GCA 012274575.1 | PDS000069637.2 |
| PDT000904248.1 | SAMN10689388  | SAMN10689388  | SRR8389067  | GCA 015714115.1 | PDS000069637.2 |
| PDT000711845.2 | SAMN10875736  | SAMN10875736  | SRR11015936 | GCA 011319685.1 | PDS000069632.2 |
| PDT000722917.2 | SAMN10689363  | SAMN10689363  | SRR8389049  | GCA 012274685.1 | PDS000069632.2 |
| PDT000852705.1 | SAMN12642226  | SAMN12642226  | SRR11016232 | GCA 014832505.1 | PDS000069632.2 |
| PDT000069549.2 | SAMEA1324595  | SAMEA1324595  | ERR134782   | GCA 001047815.1 | PDS000069642.1 |
| PDT000069551.2 | SAMEA1324675  | SAMEA1324675  | ERR134780   | GCA 001047855.1 | PDS000069642.1 |
| PDT000090436.2 | SAMEA1324551  | SAMEA1324551  | ERR134790   | GCA 001351815.1 | PDS000069642.1 |
| PDT000904396.1 | SAMN09400931  | SAMN09400931  | SRR7297538  | GCA 015717265.1 | PDS000076903.1 |
| PDT000904423.1 | SAMN09400903  | SAMN09400903  | SRR7296843  | GCA 015717805.1 | PDS000076903.1 |
| PDT000904425.1 | SAMN09400902  | SAMN09400902  | SRR7296840  | GCA 015717845.1 | PDS000076903.1 |
| PDT000904331.1 | SAMN09400999  | SAMN09400999  | SRR7296879  | GCA 015715955.1 | PDS000076880.1 |
| PDT000904598.1 | SAMN11285052  | SAMN11285052  | SRR8809976  | GCA 015727525.1 | PDS000076880.1 |
| PDT000904612.1 | SAMN10435803  | SAMN10435803  | SRR8199497  | GCA 015727805.1 | PDS000076880.1 |
| PDT000904311.1 | SAMN09401022  | SAMN09401022  | SRR7297573  | GCA 015715555.1 | PDS000076896.1 |
| PDT000904342.1 | SAMN09400988  | SAMN09400988  | SRR7297150  | GCA 015716195.1 | PDS000076896.1 |

|                |               |               |             |                 |                |
|----------------|---------------|---------------|-------------|-----------------|----------------|
| PDT000904424.1 | SAMN09400904  | SAMN09400904  | SRR7296842  | GCA 015717795.1 | PDS000076896.1 |
| PDT000258929.2 | SAMN03763945  | SAMN03763945  | SRR5912679  | GCA 002633805.1 | PDS000076721.1 |
| PDT000904217.1 | SAMN10689432  | SAMN10689432  | SRR11016773 | GCA 015713505.1 | PDS000076916.1 |
| PDT000904513.1 | SAMN12220508  | SAMN12220508  | SRR9647732  | GCA 015725715.1 | PDS000076931.1 |
| PDT000904586.1 | SAMN11285063  | SAMN11285063  | SRR8810451  | GCA 015727275.1 | PDS000076931.1 |
| PDT000904641.1 | SAMN10435775  | SAMN10435775  | SRR8199652  | GCA 015728365.1 | PDS000076931.1 |
| PDT000904468.1 | SAMN13622081  | SAMN13622081  | SRR10728164 | GCA 015724825.1 | PDS000076888.1 |
| PDT000904521.1 | SAMN12220496  | SAMN12220496  | SRR9647295  | GCA 015725905.1 | PDS000076888.1 |
| PDT000904527.1 | SAMN12220491  | SAMN12220491  | SRR9647468  | GCA 015726015.1 | PDS000076888.1 |
| PDT000904597.1 | SAMN11285050  | SAMN11285050  | SRR8809978  | GCA 015727495.1 | PDS000076936.1 |
| PDT000904661.1 | SAMN09401095  | SAMN09401095  | SRR7296963  | GCA 015728745.1 | PDS000076936.1 |
| PDT000904687.1 | SAMN09401067  | SAMN09401067  | SRR7296811  | GCA 015729295.1 | PDS000076936.1 |
| PDT000904208.1 | SAMN10689445  | SAMN10689445  | SRR8389014  | GCA 015713325.1 | PDS000076917.1 |
| PDT000904209.1 | SAMN10689446  | SAMN10689446  | SRR8389017  | GCA 015713335.1 | PDS000076917.1 |
| PDT000904210.1 | SAMN10689443  | SAMN10689443  | SRR8389012  | GCA 015713365.1 | PDS000076917.1 |
| PDT000117424.2 | SAMEA1464214  | SAMEA1464214  | ERR118397   | GCA 900042165.1 | PDS000067971.1 |
| PDT000119288.2 | SAMEA1464560  | SAMEA1464560  | ERR118398   | GCA 900040285.1 | PDS000067971.1 |
| PDT000184722.1 | SAMEA24664918 | SAMEA24664918 | ERR1753380  | GCA 015612585.1 | PDS000068095.1 |
| PDT000184723.1 | SAMEA24665668 | SAMEA24665668 | ERR1753381  | GCA 015612545.1 | PDS000068095.1 |
| PDT000184724.1 | SAMEA24666418 | SAMEA24666418 | ERR1753382  | GCA 015612565.1 | PDS000068092.1 |
| PDT000184725.1 | SAMEA24667168 | SAMEA24667168 | ERR1753383  | GCA 015612485.1 | PDS000068092.1 |
| PDT000184719.1 | SAMEA24662668 | SAMEA24662668 | ERR1753377  | GCA 015612665.1 | PDS000068096.1 |
| PDT000184720.1 | SAMEA24663418 | SAMEA24663418 | ERR1753378  | GCA 015612605.1 | PDS000068096.1 |
| PDT000115712.2 | SAMEA1317378  | SAMEA1317378  | ERR111105   | GCA 900041165.1 | PDS000068293.1 |
| PDT000118945.2 | SAMEA1469541  | SAMEA1469541  | ERR158800   | GCA 900036425.1 | PDS000068293.1 |
| PDT000238895.2 | SAMN03893377  | SAMN03893377  | SRR5909174  | GCA 002275785.1 | PDS000068467.1 |
| PDT000813960.1 | SAMN12775873  | SAMN12775873  | SRR10179173 | GCA 009463575.1 | PDS000068459.1 |
| PDT000813961.1 | SAMN12775872  | SAMN12775872  | SRR10179184 | GCA 009463585.1 | PDS000068459.1 |
| PDT000813883.1 | SAMN12775949  | SAMN12775949  | SRR10178954 | GCA 009462045.1 | PDS000068621.2 |
| PDT000903123.1 | SAMN09401059  | SAMN09401059  | SRR7297087  | GCA 015712305.1 | PDS000068621.2 |
| PDT000766297.2 | SAMN14906892  | SAMN14906892  | SRR11787429 | GCA 013338525.1 | PDS000068697.1 |
| PDT000813827.1 | SAMN12776006  | SAMN12776006  | SRR10179235 | GCA 009460935.1 | PDS000068697.1 |
| PDT000371251.2 | SAMD00083491  | SAMD00083491  | DRR107131   | GCA 003419185.1 | PDS000068696.1 |
| PDT000371358.2 | SAMD00083593  | SAMD00083593  | DRR107233   | GCA 003421525.1 | PDS000068696.1 |
| PDT000371261.2 | SAMD00083501  | SAMD00083501  | DRR107141   | GCA 003419505.1 | PDS000068694.1 |
| PDT000371381.2 | SAMD00083616  | SAMD00083616  | DRR107256   | GCA 003421985.1 | PDS000068694.1 |
| PDT000371262.2 | SAMD00083502  | SAMD00083502  | DRR107142   | GCA 003419525.1 | PDS000068692.1 |
| PDT000371382.2 | SAMD00083617  | SAMD00083617  | DRR107257   | GCA 003422005.1 | PDS000068692.1 |
| PDT000371234.2 | SAMD00083475  | SAMD00083475  | DRR107115   | GCA 003418485.1 | PDS000068701.1 |
| PDT000371320.2 | SAMD00083555  | SAMD00083555  | DRR107195   | GCA 003420735.1 | PDS000068701.1 |
| PDT000371265.2 | SAMD00083505  | SAMD00083505  | DRR107145   | GCA 003419585.1 | PDS000068691.1 |
| PDT000371384.2 | SAMD00083619  | SAMD00083619  | DRR107259   | GCA 003422045.1 | PDS000068691.1 |
| PDT000371256.2 | SAMD00083496  | SAMD00083496  | DRR107136   | GCA 003419405.1 | PDS000068695.1 |
| PDT000371363.2 | SAMD00083598  | SAMD00083598  | DRR107238   | GCA 003421625.1 | PDS000068695.1 |
| PDT000371237.2 | SAMD00083478  | SAMD00083478  | DRR107118   | GCA 003418615.1 | PDS000068700.1 |
| PDT000371329.2 | SAMD00083563  | SAMD00083563  | DRR107203   | GCA 003420925.1 | PDS000068700.1 |
| PDT000766328.2 | SAMN14906860  | SAMN14906860  | SRR11787416 | GCA 013339165.1 | PDS000068860.1 |
| PDT000813717.1 | SAMN12776116  | SAMN12776116  | SRR10179113 | GCA 009458725.1 | PDS000068860.1 |
| PDT000790239.2 | SAMEA4008695  | SAMEA4008695  | ERR1715397  | GCA 903801185.1 | PDS000068858.1 |
| PDT000343074.2 | SAMEA1466908  | SAMEA1466908  | ERR156466   | GCA 900482615.1 | PDS000068851.1 |
| PDT000343083.2 | SAMEA1466944  | SAMEA1466944  | ERR156468   | GCA 900482595.1 | PDS000068851.1 |
| PDT000298225.2 | SAMN08689421  | SAMN08689421  | SRR6828695  | GCA 003011115.1 | PDS000068864.1 |
| PDT000298228.2 | SAMN08689423  | SAMN08689423  | SRR6828685  | GCA 003011175.1 | PDS000068864.1 |
| PDT000766262.2 | SAMN14906925  | SAMN14906925  | SRR11787438 | GCA 013337805.1 | PDS000069023.1 |
| PDT000813599.1 | SAMN12776232  | SAMN12776232  | SRR10179026 | GCA 009456365.1 | PDS000069023.1 |
| PDT000238855.2 | SAMN03893320  | SAMN03893320  | SRR5909258  | GCA 002274975.1 | PDS000069022.1 |
| PDT000238856.2 | SAMN03893321  | SAMN03893321  | SRR5909259  | GCA 002274995.1 | PDS000069022.1 |
| PDT000238763.2 | SAMN03893230  | SAMN03893230  | SRR5909281  | GCA 002273095.1 | PDS000069024.1 |
| PDT000238764.2 | SAMN03893232  | SAMN03893232  | SRR5909279  | GCA 002273145.1 | PDS000069024.1 |
| PDT000238906.2 | SAMN03893322  | SAMN03893322  | SRR5909264  | GCA 002275985.1 | PDS000069020.1 |
| PDT000238907.2 | SAMN03893323  | SAMN03893323  | SRR5909265  | GCA 002276025.1 | PDS000069020.1 |
| PDT000083743.2 | SAMEA2236441  | SAMEA2236441  | ERR422894   | GCA 001288705.1 | PDS000069165.1 |
| PDT000083866.2 | SAMEA2384062  | SAMEA2384062  | ERR540266   | GCA 001291165.1 | PDS000069165.1 |
| PDT000083705.2 | SAMEA2384888  | SAMEA2384888  | ERR554810   | GCA 001287925.1 | PDS000069160.1 |
| PDT000083750.2 | SAMEA2384879  | SAMEA2384879  | ERR554801   | GCA 001288845.1 | PDS000069160.1 |
| PDT000164615.2 | SAMEA3109334  | SAMEA3109334  | ERR829984   | GCA 900097425.1 | PDS000069168.1 |
| PDT000164745.2 | SAMEA3109335  | SAMEA3109335  | ERR829985   | GCA 900097585.1 | PDS000069168.1 |
| PDT000083711.2 | SAMEA2384652  | SAMEA2384652  | ERR554574   | GCA 001288045.1 | PDS000069169.1 |

|                |                |                |             |                 |                |
|----------------|----------------|----------------|-------------|-----------------|----------------|
| PDT000083774.2 | SAMEA2384692   | SAMEA2384692   | ERR554614   | GCA 001289325.1 | PDS000069169.1 |
| PDT000170427.2 | SAMEA3449042   | SAMEA3449042   | ERR1069895  | GCA 900125215.1 | PDS000069161.1 |
| PDT000170721.2 | SAMEA3448968   | SAMEA3448968   | ERR1070055  | GCA 900126485.1 | PDS000069161.1 |
| PDT000083725.2 | SAMEA2445582   | SAMEA2445582   | ERR573285   | GCA 001288345.1 | PDS000069167.1 |
| PDT000083818.2 | SAMEA2384352   | SAMEA2384352   | ERR554276   | GCA 001290205.1 | PDS000069167.1 |
| PDT000791034.2 | SAMEA70057918  | SAMEA70057918  | ERR2506332  | GCA 903807765.1 | PDS000069331.1 |
| PDT000791046.2 | SAMEA70066918  | SAMEA70066918  | ERR2506344  | GCA 903807885.1 | PDS000069331.1 |
| PDT000791073.2 | SAMEA70087168  | SAMEA70087168  | ERR2506371  | GCA 903808165.1 | PDS000069327.1 |
| PDT000791075.2 | SAMEA70088668  | SAMEA70088668  | ERR2506373  | GCA 903808175.1 | PDS000069327.1 |
| PDT000772467.2 | SAMEA103891341 | SAMEA103891341 | ERR2533572  | GCA 903812895.1 | PDS000069328.1 |
| PDT000791069.2 | SAMEA70084168  | SAMEA70084168  | ERR2506367  | GCA 903808145.1 | PDS000069328.1 |
| PDT000791077.2 | SAMEA70090168  | SAMEA70090168  | ERR2506375  | GCA 903808195.1 | PDS000069326.1 |
| PDT000791112.2 | SAMEA70118668  | SAMEA70118668  | ERR2506410  | GCA 903808545.1 | PDS000069326.1 |
| PDT000790952.2 | SAMEA4553241   | SAMEA4553241   | ERR3012777  | GCA 903806945.1 | PDS000069332.1 |
| PDT000791044.2 | SAMEA70065418  | SAMEA70065418  | ERR2506342  | GCA 903807865.1 | PDS000069332.1 |
| PDT000791024.2 | SAMEA70050418  | SAMEA70050418  | ERR2506322  | GCA 903807665.1 | PDS000069341.1 |
| PDT000791041.2 | SAMEA70063168  | SAMEA70063168  | ERR2506339  | GCA 903807835.1 | PDS000069341.1 |
| PDT000791003.2 | SAMEA4553293   | SAMEA4553293   | ERR3012829  | GCA 903807455.1 | PDS000069335.1 |
| PDT000791042.2 | SAMEA70063918  | SAMEA70063918  | ERR2506340  | GCA 903807845.1 | PDS000069335.1 |
| PDT000132765.2 | SAMEA2384399   | SAMEA2384399   | ERR554322   | GCA 900081695.1 | PDS000069334.1 |
| PDT000132936.2 | SAMEA2383898   | SAMEA2383898   | ERR554107   | GCA 900081235.1 | PDS000069334.1 |
| PDT000772507.2 | SAMEA103891381 | SAMEA103891381 | ERR2533612  | GCA 903801125.1 | PDS000069458.1 |
| PDT000772504.2 | SAMEA103891378 | SAMEA103891378 | ERR2533609  | GCA 903801075.1 | PDS000069459.1 |
| PDT000772452.2 | SAMEA103891326 | SAMEA103891326 | ERR2533558  | GCA 903812755.1 | PDS000069463.1 |
| PDT000772465.2 | SAMEA103891339 | SAMEA103891339 | ERR2533570  | GCA 903812875.1 | PDS000069463.1 |
| PDT000772463.2 | SAMEA103891337 | SAMEA103891337 | ERR2533568  | GCA 903812845.1 | PDS000069465.1 |
| PDT000772468.2 | SAMEA103891342 | SAMEA103891342 | ERR2533573  | GCA 903812905.1 | PDS000069465.1 |
| PDT000772464.2 | SAMEA103891338 | SAMEA103891338 | ERR2533569  | GCA 903812865.1 | PDS000069464.1 |
| PDT000772466.2 | SAMEA103891340 | SAMEA103891340 | ERR2533571  | GCA 903812885.1 | PDS000069464.1 |
| PDT000772451.2 | SAMEA103891325 | SAMEA103891325 | ERR2533557  | GCA 903812745.1 | PDS000069469.1 |
| PDT000772458.2 | SAMEA103891332 | SAMEA103891332 | ERR2533563  | GCA 903812805.1 | PDS000069469.1 |
| PDT000772472.2 | SAMEA103891346 | SAMEA103891346 | ERR2533577  | GCA 903812945.1 | PDS000069461.1 |
| PDT000772476.2 | SAMEA103891350 | SAMEA103891350 | ERR2533581  | GCA 903812985.1 | PDS000069461.1 |
| PDT000132829.2 | SAMEA2383930   | SAMEA2383930   | ERR554139   | GCA 900081315.1 | PDS000069468.1 |
| PDT000132883.2 | SAMEA2384336   | SAMEA2384336   | ERR554260   | GCA 900081505.1 | PDS000069468.1 |
| PDT000766281.2 | SAMN14906907   | SAMN14906907   | SRR11787396 | GCA 013338205.1 | PDS000069553.1 |
| PDT000813667.1 | SAMN12776166   | SAMN12776166   | SRR10179273 | GCA 009457715.1 | PDS000069553.1 |
| PDT000766284.2 | SAMN14906905   | SAMN14906905   | SRR11787398 | GCA 013338265.1 | PDS000069550.1 |
| PDT000813802.1 | SAMN12776032   | SAMN12776032   | SRR10179206 | GCA 009460405.1 | PDS000069550.1 |
| PDT000766283.2 | SAMN14906904   | SAMN14906904   | SRR11787399 | GCA 013338245.1 | PDS000069551.1 |
| PDT000813633.1 | SAMN12776201   | SAMN12776201   | SRR10179061 | GCA 009457025.1 | PDS000069551.1 |
| PDT000766273.2 | SAMN14906918   | SAMN14906918   | SRR11787446 | GCA 013338025.1 | PDS000069557.1 |
| PDT000813607.1 | SAMN12776226   | SAMN12776226   | SRR10179033 | GCA 009456505.1 | PDS000069557.1 |
| PDT000766280.2 | SAMN14906908   | SAMN14906908   | SRR11787395 | GCA 013338185.1 | PDS000069554.1 |
| PDT000813625.1 | SAMN12776208   | SAMN12776208   | SRR10179053 | GCA 009456875.1 | PDS000069554.1 |
| PDT000766285.2 | SAMN14906903   | SAMN14906903   | SRR11787401 | GCA 013338285.1 | PDS000069549.1 |
| PDT000813636.1 | SAMN12776196   | SAMN12776196   | SRR10179066 | GCA 009457105.1 | PDS000069549.1 |
| PDT000766286.2 | SAMN14906902   | SAMN14906902   | SRR11787418 | GCA 013338305.1 | PDS000069548.1 |
| PDT000813812.1 | SAMN12776021   | SAMN12776021   | SRR10179219 | GCA 009460625.1 | PDS000069548.1 |
| PDT000766276.2 | SAMN14906911   | SAMN14906911   | SRR11787392 | GCA 013338105.1 | PDS000069555.1 |
| PDT000813786.1 | SAMN12776046   | SAMN12776046   | SRR10179191 | GCA 009460105.1 | PDS000069555.1 |
| PDT000132768.2 | SAMEA2384800   | SAMEA2384800   | ERR554722   | GCA 900082935.1 | PDS000069556.1 |
| PDT000132808.2 | SAMEA2384856   | SAMEA2384856   | ERR554778   | GCA 900082805.1 | PDS000069556.1 |
| PDT000063465.2 | SAMEA1033375   | SAMEA1033375   | ERR084772   | GCA 000982735.1 | PDS000069671.1 |
| PDT000079411.2 | SAMEA1033436   | SAMEA1033436   | ERR084771   | GCA 001203975.1 | PDS000069671.1 |
| PDT000618864.1 | SAMN12768970   | SAMN12768970   | SRR10126927 | GCA 015600125.1 | PDS000069868.1 |
| PDT000618880.1 | SAMN12768956   | SAMN12768956   | SRR10126943 | GCA 015599905.1 | PDS000069868.1 |
| PDT000537205.1 | SAMN12189890   | SAMN12189890   | SRR9620894  | GCA 015604385.1 | PDS000069883.1 |
| PDT000537239.1 | SAMN12190392   | SAMN12190392   | SRR9620954  | GCA 015604405.1 | PDS000069883.1 |
| PDT000619014.1 | SAMN12768911   | SAMN12768911   | SRR10127077 | GCA 015596385.1 | PDS000069870.1 |
| PDT000619017.1 | SAMN12768909   | SAMN12768909   | SRR10127080 | GCA 015596345.1 | PDS000069870.1 |
| PDT000619020.1 | SAMN12768906   | SAMN12768906   | SRR10127083 | GCA 015596265.1 | PDS000069871.1 |
| PDT000619023.1 | SAMN12768903   | SAMN12768903   | SRR10127086 | GCA 015596185.1 | PDS000069871.1 |
| PDT000619018.1 | SAMN12768908   | SAMN12768908   | SRR10127081 | GCA 015596305.1 | PDS000069872.1 |
| PDT000619021.1 | SAMN12768905   | SAMN12768905   | SRR10127084 | GCA 015596285.1 | PDS000069872.1 |
| PDT000178176.2 | SAMN03893383   | SAMN03893383   | SRR5909172  | GCA 001936915.1 | PDS000069139.1 |
| PDT000238847.2 | SAMN03893397   | SAMN03893397   | SRR5909166  | GCA 002274805.1 | PDS000069139.1 |
| PDT000791377.2 | SAMEA70323418  | SAMEA70323418  | ERR2525377  | GCA 903811125.1 | PDS000069296.1 |

|                |               |               |            |                 |                |
|----------------|---------------|---------------|------------|-----------------|----------------|
| PDT000791378.2 | SAMEA70324168 | SAMEA70324168 | ERR2525378 | GCA 903811135.1 | PDS000069296.1 |
| PDT000791379.2 | SAMEA70324918 | SAMEA70324918 | ERR2525379 | GCA 903811145.1 | PDS000069296.1 |
| PDT000791380.2 | SAMEA70325668 | SAMEA70325668 | ERR2525380 | GCA 903811155.1 | PDS000069296.1 |
| PDT000791382.2 | SAMEA70327168 | SAMEA70327168 | ERR2525382 | GCA 903811175.1 | PDS000069296.1 |
| PDT000791383.2 | SAMEA70327918 | SAMEA70327918 | ERR2525383 | GCA 903811185.1 | PDS000069296.1 |
| PDT000791386.2 | SAMEA70330168 | SAMEA70330168 | ERR2525386 | GCA 903811215.1 | PDS000069296.1 |
| PDT000791388.2 | SAMEA70331668 | SAMEA70331668 | ERR2525388 | GCA 903811235.1 | PDS000069296.1 |
| PDT000791390.2 | SAMEA70333168 | SAMEA70333168 | ERR2525390 | GCA 903811255.1 | PDS000069296.1 |
| PDT000791391.2 | SAMEA70333918 | SAMEA70333918 | ERR2525391 | GCA 903811265.1 | PDS000069296.1 |
| PDT000791392.2 | SAMEA70334668 | SAMEA70334668 | ERR2525392 | GCA 903811275.1 | PDS000069296.1 |
| PDT000791394.2 | SAMEA70336168 | SAMEA70336168 | ERR2525394 | GCA 903811295.1 | PDS000069296.1 |
| PDT000791395.2 | SAMEA70336918 | SAMEA70336918 | ERR2525395 | GCA 903811305.1 | PDS000069296.1 |
| PDT000791397.2 | SAMEA70338418 | SAMEA70338418 | ERR2525397 | GCA 903811325.1 | PDS000069296.1 |
| PDT000791400.2 | SAMEA70340668 | SAMEA70340668 | ERR2525400 | GCA 903811355.1 | PDS000069296.1 |
| PDT000791401.2 | SAMEA70341418 | SAMEA70341418 | ERR2525401 | GCA 903811365.1 | PDS000069296.1 |
| PDT000791403.2 | SAMEA70342918 | SAMEA70342918 | ERR2525403 | GCA 903811385.1 | PDS000069296.1 |
| PDT000805036.2 | SAMEA6125797  | SAMEA6125797  | ERR3623731 | GCA 903988225.1 | PDS000069296.1 |
| PDT000805058.2 | SAMEA6125788  | SAMEA6125788  | ERR3623722 | GCA 903988425.1 | PDS000069296.1 |
| PDT000805061.2 | SAMEA6125808  | SAMEA6125808  | ERR3623719 | GCA 903988485.1 | PDS000069296.1 |
| PDT000805062.2 | SAMEA6125786  | SAMEA6125786  | ERR3623721 | GCA 903988465.1 | PDS000069296.1 |
| PDT000805067.2 | SAMEA6125792  | SAMEA6125792  | ERR3623727 | GCA 903988515.1 | PDS000069296.1 |
| PDT000805068.2 | SAMEA6125796  | SAMEA6125796  | ERR3623726 | GCA 903988555.1 | PDS000069296.1 |
| PDT000805069.2 | SAMEA6125791  | SAMEA6125791  | ERR3623725 | GCA 903988545.1 | PDS000069296.1 |
| PDT000805083.2 | SAMEA6125785  | SAMEA6125785  | ERR3623723 | GCA 903988615.1 | PDS000069296.1 |
| PDT000805108.2 | SAMEA6125798  | SAMEA6125798  | ERR3623733 | GCA 903988935.1 | PDS000069296.1 |
| PDT000805110.2 | SAMEA6125793  | SAMEA6125793  | ERR3623729 | GCA 903988945.1 | PDS000069296.1 |
| PDT000805111.2 | SAMEA6125800  | SAMEA6125800  | ERR3623730 | GCA 903988955.1 | PDS000069296.1 |
| PDT000805112.2 | SAMEA6125795  | SAMEA6125795  | ERR3623732 | GCA 903988965.1 | PDS000069296.1 |
| PDT000805113.2 | SAMEA6125807  | SAMEA6125807  | ERR3623742 | GCA 903988975.1 | PDS000069296.1 |
| PDT000805114.2 | SAMEA6125801  | SAMEA6125801  | ERR3623737 | GCA 903988985.1 | PDS000069296.1 |
| PDT000805115.2 | SAMEA6125825  | SAMEA6125825  | ERR3623741 | GCA 903988995.1 | PDS000069296.1 |
| PDT000805116.2 | SAMEA6125842  | SAMEA6125842  | ERR3623735 | GCA 903989005.1 | PDS000069296.1 |
| PDT000805117.2 | SAMEA6125806  | SAMEA6125806  | ERR3623743 | GCA 903989015.1 | PDS000069296.1 |
| PDT000805121.2 | SAMEA6125813  | SAMEA6125813  | ERR3623747 | GCA 903989035.1 | PDS000069296.1 |
| PDT000805123.2 | SAMEA6125818  | SAMEA6125818  | ERR3623753 | GCA 903989085.1 | PDS000069296.1 |
| PDT000805124.2 | SAMEA6125814  | SAMEA6125814  | ERR3623751 | GCA 903989105.1 | PDS000069296.1 |
| PDT000805125.2 | SAMEA6125823  | SAMEA6125823  | ERR3623755 | GCA 903989095.1 | PDS000069296.1 |
| PDT000805129.2 | SAMEA6125821  | SAMEA6125821  | ERR3623754 | GCA 903989135.1 | PDS000069296.1 |
| PDT000805131.2 | SAMEA6125804  | SAMEA6125804  | ERR3623734 | GCA 903989145.1 | PDS000069296.1 |
| PDT000805132.2 | SAMEA6125822  | SAMEA6125822  | ERR3623758 | GCA 903989165.1 | PDS000069296.1 |
| PDT000805133.2 | SAMEA6125802  | SAMEA6125802  | ERR3623738 | GCA 903989195.1 | PDS000069296.1 |
| PDT000805134.2 | SAMEA6125810  | SAMEA6125810  | ERR3623746 | GCA 903989215.1 | PDS000069296.1 |
| PDT000805135.2 | SAMEA6125827  | SAMEA6125827  | ERR3623762 | GCA 903989185.1 | PDS000069296.1 |
| PDT000805136.2 | SAMEA6125809  | SAMEA6125809  | ERR3623744 | GCA 903989225.1 | PDS000069296.1 |
| PDT000805138.2 | SAMEA6125803  | SAMEA6125803  | ERR3623739 | GCA 903989175.1 | PDS000069296.1 |
| PDT000805191.2 | SAMEA5886141  | SAMEA5886141  | ERR3495007 | GCA 903989595.1 | PDS000069296.1 |
| PDT000805196.2 | SAMEA5886139  | SAMEA5886139  | ERR3494984 | GCA 903989625.1 | PDS000069296.1 |
| PDT000670013.2 | SAMEA958854   | SAMEA958854   | ERR023864  | GCA 902714035.1 | PDS000069798.1 |
| PDT000670015.2 | SAMEA958857   | SAMEA958857   | ERR023879  | GCA 902714045.1 | PDS000069798.1 |
| PDT000670021.2 | SAMEA958806   | SAMEA958806   | ERR023872  | GCA 902714115.1 | PDS000069798.1 |
| PDT000670036.2 | SAMEA958961   | SAMEA958961   | ERR033829  | GCA 902714195.1 | PDS000069798.1 |
| PDT000670039.2 | SAMEA958824   | SAMEA958824   | ERR023878  | GCA 902714205.1 | PDS000069798.1 |
| PDT000670059.2 | SAMEA958986   | SAMEA958986   | ERR033822  | GCA 902714415.1 | PDS000069798.1 |
| PDT000675978.2 | SAMEA2076762  | SAMEA2076762  | ERR485482  | GCA 902719265.1 | PDS000069798.1 |
| PDT000675983.2 | SAMEA2076763  | SAMEA2076763  | ERR485483  | GCA 902719285.1 | PDS000069798.1 |
| PDT000676010.2 | SAMEA2077034  | SAMEA2077034  | ERR358089  | GCA 902719625.1 | PDS000069798.1 |
| PDT000681624.2 | SAMEA2078077  | SAMEA2078077  | ERR353234  | GCA 902720985.1 | PDS000069798.1 |
| PDT000681626.2 | SAMEA2078076  | SAMEA2078076  | ERR353232  | GCA 902720895.1 | PDS000069798.1 |
| PDT000681628.2 | SAMEA2081779  | SAMEA2081779  | ERR360201  | GCA 902720945.1 | PDS000069798.1 |
| PDT000681629.2 | SAMEA2078083  | SAMEA2078083  | ERR360203  | GCA 902720935.1 | PDS000069798.1 |
| PDT000681630.2 | SAMEA2078080  | SAMEA2078080  | ERR496742  | GCA 902720965.1 | PDS000069798.1 |
| PDT000681631.2 | SAMEA2081778  | SAMEA2081778  | ERR360198  | GCA 902720955.1 | PDS000069798.1 |
| PDT000681633.2 | SAMEA2081776  | SAMEA2081776  | ERR353233  | GCA 902720975.1 | PDS000069798.1 |
| PDT000681634.2 | SAMEA2078081  | SAMEA2078081  | ERR496744  | GCA 902720925.1 | PDS000069798.1 |
| PDT000681635.2 | SAMEA2078079  | SAMEA2078079  | ERR496741  | GCA 902720885.1 | PDS000069798.1 |
| PDT000681636.2 | SAMEA2081780  | SAMEA2081780  | ERR496749  | GCA 902720905.1 | PDS000069798.1 |
| PDT000681637.2 | SAMEA2078075  | SAMEA2078075  | ERR485640  | GCA 902721055.1 | PDS000069798.1 |
| PDT000681638.2 | SAMEA2078084  | SAMEA2078084  | ERR496750  | GCA 902720995.1 | PDS000069798.1 |

|                |              |              |            |                 |                |
|----------------|--------------|--------------|------------|-----------------|----------------|
| PDT000681640.2 | SAMEA2078078 | SAMEA2078078 | ERR485644  | GCA 902721065.1 | PDS000069798.1 |
| PDT000681641.2 | SAMEA1964432 | SAMEA1964432 | ERR496745  | GCA 902721045.1 | PDS000069798.1 |
| PDT000681642.2 | SAMEA2081777 | SAMEA2081777 | ERR485645  | GCA 902721015.1 | PDS000069798.1 |
| PDT000681643.2 | SAMEA2078082 | SAMEA2078082 | ERR496747  | GCA 902721025.1 | PDS000069798.1 |
| PDT000681645.2 | SAMEA1967386 | SAMEA1967386 | ERR496751  | GCA 902721075.1 | PDS000069798.1 |
| PDT000681647.2 | SAMEA2078085 | SAMEA2078085 | ERR358142  | GCA 902721205.1 | PDS000069798.1 |
| PDT000681648.2 | SAMEA2078091 | SAMEA2078091 | ERR358152  | GCA 902721095.1 | PDS000069798.1 |
| PDT000681649.2 | SAMEA2081781 | SAMEA2081781 | ERR358141  | GCA 902721125.1 | PDS000069798.1 |
| PDT000681650.2 | SAMEA2081784 | SAMEA2081784 | ERR358153  | GCA 902721165.1 | PDS000069798.1 |
| PDT000681651.2 | SAMEA2078087 | SAMEA2078087 | ERR358146  | GCA 902721145.1 | PDS000069798.1 |
| PDT000681652.2 | SAMEA2078089 | SAMEA2078089 | ERR496760  | GCA 902721105.1 | PDS000069798.1 |
| PDT000681653.2 | SAMEA1963675 | SAMEA1963675 | ERR496765  | GCA 902721185.1 | PDS000069798.1 |
| PDT000681654.2 | SAMEA2078088 | SAMEA2078088 | ERR496759  | GCA 902721235.1 | PDS000069798.1 |
| PDT000681658.2 | SAMEA2078090 | SAMEA2078090 | ERR496762  | GCA 902721135.1 | PDS000069798.1 |
| PDT000681660.2 | SAMEA2081782 | SAMEA2081782 | ERR496755  | GCA 902721085.1 | PDS000069798.1 |
| PDT000681661.2 | SAMEA1964070 | SAMEA1964070 | ERR496754  | GCA 902721155.1 | PDS000069798.1 |
| PDT000681662.2 | SAMEA2078086 | SAMEA2078086 | ERR358145  | GCA 902721175.1 | PDS000069798.1 |
| PDT000681663.2 | SAMEA1972539 | SAMEA1972539 | ERR358147  | GCA 902721225.1 | PDS000069798.1 |
| PDT000681664.2 | SAMEA2078310 | SAMEA2078310 | ERR496766  | GCA 902721115.1 | PDS000069798.1 |
| PDT000681665.2 | SAMEA2081783 | SAMEA2081783 | ERR496761  | GCA 902721275.1 | PDS000069798.1 |
| PDT000681715.2 | SAMEA2080250 | SAMEA2080250 | ERR360270  | GCA 902721775.1 | PDS000069798.1 |
| PDT000681731.2 | SAMEA2080251 | SAMEA2080251 | ERR360273  | GCA 902721965.1 | PDS000069798.1 |
| PDT000681734.2 | SAMEA2078592 | SAMEA2078592 | ERR496831  | GCA 902721925.1 | PDS000069798.1 |
| PDT000681740.2 | SAMEA2078593 | SAMEA2078593 | ERR360272  | GCA 902722065.1 | PDS000069798.1 |
| PDT000681744.2 | SAMEA2078594 | SAMEA2078594 | ERR353237  | GCA 902721975.1 | PDS000069798.1 |
| PDT000079481.2 | SAMEA1709024 | SAMEA1709024 | ERR234887  | GCA 001205435.1 | PDS000069386.1 |
| PDT000112252.2 | SAMEA1317514 | SAMEA1317514 | ERR107947  | GCA 900057635.1 | PDS000069386.1 |
| PDT000112321.2 | SAMEA1317375 | SAMEA1317375 | ERR107936  | GCA 900038925.1 | PDS000069386.1 |
| PDT000115866.2 | SAMEA1469540 | SAMEA1469540 | ERR158715  | GCA 900046415.1 | PDS000069386.1 |
| PDT000116140.2 | SAMEA1469705 | SAMEA1469705 | ERR158628  | GCA 900045055.1 | PDS000069386.1 |
| PDT000116391.2 | SAMEA1464268 | SAMEA1464268 | ERR129283  | GCA 900019155.1 | PDS000069386.1 |
| PDT000116642.2 | SAMEA1317373 | SAMEA1317373 | ERR111112  | GCA 900046335.1 | PDS000069386.1 |
| PDT000116705.2 | SAMEA1464327 | SAMEA1464327 | ERR118481  | GCA 900039965.1 | PDS000069386.1 |
| PDT000116819.2 | SAMEA1469534 | SAMEA1469534 | ERR158714  | GCA 900044795.1 | PDS000069386.1 |
| PDT000117077.2 | SAMEA1317371 | SAMEA1317371 | ERR111106  | GCA 900044785.1 | PDS000069386.1 |
| PDT000117111.2 | SAMEA1464359 | SAMEA1464359 | ERR129253  | GCA 900044485.1 | PDS000069386.1 |
| PDT000117391.2 | SAMEA1317588 | SAMEA1317588 | ERR107943  | GCA 900048655.1 | PDS000069386.1 |
| PDT000117468.2 | SAMEA1469684 | SAMEA1469684 | ERR158795  | GCA 900017615.1 | PDS000069386.1 |
| PDT000117843.2 | SAMEA1469533 | SAMEA1469533 | ERR158713  | GCA 900046405.1 | PDS000069386.1 |
| PDT000117970.2 | SAMEA1469648 | SAMEA1469648 | ERR158657  | GCA 900037975.1 | PDS000069386.1 |
| PDT000118014.2 | SAMEA1469546 | SAMEA1469546 | ERR158620  | GCA 900053465.1 | PDS000069386.1 |
| PDT000118093.2 | SAMEA1464272 | SAMEA1464272 | ERR118577  | GCA 900045675.1 | PDS000069386.1 |
| PDT000118180.2 | SAMEA1464703 | SAMEA1464703 | ERR134401  | GCA 900059245.1 | PDS000069386.1 |
| PDT000118301.2 | SAMEA1464513 | SAMEA1464513 | ERR134385  | GCA 900035585.1 | PDS000069386.1 |
| PDT000118330.2 | SAMEA1469567 | SAMEA1469567 | ERR158656  | GCA 900050265.1 | PDS000069386.1 |
| PDT000118387.2 | SAMEA1464562 | SAMEA1464562 | ERR134388  | GCA 900051075.1 | PDS000069386.1 |
| PDT000118481.2 | SAMEA1464589 | SAMEA1464589 | ERR134400  | GCA 900057815.1 | PDS000069386.1 |
| PDT000118781.2 | SAMEA1317536 | SAMEA1317536 | ERR111127  | GCA 900046395.1 | PDS000069386.1 |
| PDT000118976.2 | SAMEA1464326 | SAMEA1464326 | ERR118388  | GCA 900039785.1 | PDS000069386.1 |
| PDT000119462.2 | SAMEA1464607 | SAMEA1464607 | ERR129319  | GCA 900019135.1 | PDS000069386.1 |
| PDT000119535.2 | SAMEA1464501 | SAMEA1464501 | ERR124438  | GCA 900048165.1 | PDS000069386.1 |
| PDT000343135.2 | SAMEA1469908 | SAMEA1469908 | ERR159060  | GCA 900483325.1 | PDS000069386.1 |
| PDT000343155.2 | SAMEA1469934 | SAMEA1469934 | ERR159071  | GCA 900483675.1 | PDS000069386.1 |
| PDT000343190.2 | SAMEA1531700 | SAMEA1531700 | ERR177179  | GCA 900483835.1 | PDS000069386.1 |
| PDT000343195.2 | SAMEA1531705 | SAMEA1531705 | ERR177171  | GCA 900483925.1 | PDS000069386.1 |
| PDT000343196.2 | SAMEA1531706 | SAMEA1531706 | ERR177176  | GCA 900483645.1 | PDS000069386.1 |
| PDT000343198.2 | SAMEA1531708 | SAMEA1531708 | ERR177170  | GCA 900483865.1 | PDS000069386.1 |
| PDT000343199.2 | SAMEA1531709 | SAMEA1531709 | ERR177178  | GCA 900483655.1 | PDS000069386.1 |
| PDT000343205.2 | SAMEA1531716 | SAMEA1531716 | ERR177182  | GCA 900484005.1 | PDS000069386.1 |
| PDT000343215.2 | SAMEA1531732 | SAMEA1531732 | ERR177198  | GCA 900483915.1 | PDS000069386.1 |
| PDT000343220.2 | SAMEA1531737 | SAMEA1531737 | ERR177185  | GCA 900483985.1 | PDS000069386.1 |
| PDT000343227.2 | SAMEA1531743 | SAMEA1531743 | ERR177224  | GCA 900484405.1 | PDS000069386.1 |
| PDT000782259.2 | SAMEA4008624 | SAMEA4008624 | ERR1723999 | GCA 903800235.1 | PDS000069386.1 |
| PDT000790629.2 | SAMEA4553078 | SAMEA4553078 | ERR1891809 | GCA 903805345.1 | PDS000069386.1 |
| PDT000790631.2 | SAMEA4553080 | SAMEA4553080 | ERR1891811 | GCA 903805365.1 | PDS000069386.1 |
| PDT000790664.2 | SAMEA4553114 | SAMEA4553114 | ERR1891845 | GCA 903805685.1 | PDS000069386.1 |
| PDT000790707.2 | SAMEA4553128 | SAMEA4553128 | ERR1891859 | GCA 903805835.1 | PDS000069386.1 |
| PDT000790727.2 | SAMEA4553137 | SAMEA4553137 | ERR1891866 | GCA 903805885.1 | PDS000069386.1 |

|                |                |                |            |                 |                |
|----------------|----------------|----------------|------------|-----------------|----------------|
| PDT000115562.2 | SAMEA1317387   | SAMEA1317387   | ERR111060  | GCA 900046195.1 | PDS000069340.1 |
| PDT000115678.2 | SAMEA1464517   | SAMEA1464517   | ERR124452  | GCA 900051035.1 | PDS000069340.1 |
| PDT000115849.2 | SAMEA1469687   | SAMEA1469687   | ERR158751  | GCA 900042675.1 | PDS000069340.1 |
| PDT000116050.2 | SAMEA1464387   | SAMEA1464387   | ERR118449  | GCA 900058875.1 | PDS000069340.1 |
| PDT000116833.2 | SAMEA1464220   | SAMEA1464220   | ERR118451  | GCA 900039165.1 | PDS000069340.1 |
| PDT000116881.2 | SAMEA1469604   | SAMEA1469604   | ERR158682  | GCA 900020425.1 | PDS000069340.1 |
| PDT000117168.2 | SAMEA1317447   | SAMEA1317447   | ERR107896  | GCA 900064795.1 | PDS000069340.1 |
| PDT000117610.2 | SAMEA1464543   | SAMEA1464543   | ERR129309  | GCA 900044935.1 | PDS000069340.1 |
| PDT000117758.2 | SAMEA1464328   | SAMEA1464328   | ERR124454  | GCA 900058905.1 | PDS000069340.1 |
| PDT000119427.2 | SAMEA1469598   | SAMEA1469598   | ERR158679  | GCA 900018195.1 | PDS000069340.1 |
| PDT000119487.2 | SAMEA1317481   | SAMEA1317481   | ERR107786  | GCA 900018755.1 | PDS000069340.1 |
| PDT000772669.2 | SAMEA103891546 | SAMEA103891546 | ERR2533775 | GCA 903806925.1 | PDS000069340.1 |
| PDT000790921.2 | SAMEA4553210   | SAMEA4553210   | ERR1891938 | GCA 903806595.1 | PDS000069340.1 |
| PDT000790924.2 | SAMEA4553213   | SAMEA4553213   | ERR1891941 | GCA 903806665.1 | PDS000069340.1 |
| PDT000790925.2 | SAMEA4553214   | SAMEA4553214   | ERR1891942 | GCA 903806655.1 | PDS000069340.1 |
| PDT000790936.2 | SAMEA4553225   | SAMEA4553225   | ERR3012761 | GCA 903806755.1 | PDS000069340.1 |
| PDT000790937.2 | SAMEA4553226   | SAMEA4553226   | ERR3012762 | GCA 903806785.1 | PDS000069340.1 |
| PDT000790944.2 | SAMEA4553233   | SAMEA4553233   | ERR3012769 | GCA 903806855.1 | PDS000069340.1 |
| PDT000790951.2 | SAMEA4553240   | SAMEA4553240   | ERR3012776 | GCA 903806915.1 | PDS000069340.1 |
| PDT000790956.2 | SAMEA4553245   | SAMEA4553245   | ERR3012781 | GCA 903806985.1 | PDS000069340.1 |
| PDT000790957.2 | SAMEA4553246   | SAMEA4553246   | ERR3012782 | GCA 903806995.1 | PDS000069340.1 |
| PDT000790971.2 | SAMEA4553261   | SAMEA4553261   | ERR3012797 | GCA 903807145.1 | PDS000069340.1 |
| PDT000790979.2 | SAMEA4553269   | SAMEA4553269   | ERR3012805 | GCA 903807215.1 | PDS000069340.1 |
| PDT000790980.2 | SAMEA4553270   | SAMEA4553270   | ERR3012806 | GCA 903807225.1 | PDS000069340.1 |
| PDT000790983.2 | SAMEA4553273   | SAMEA4553273   | ERR3012809 | GCA 903807245.1 | PDS000069340.1 |
| PDT000790984.2 | SAMEA4553274   | SAMEA4553274   | ERR3012810 | GCA 903807265.1 | PDS000069340.1 |
| PDT000790988.2 | SAMEA4553278   | SAMEA4553278   | ERR3012814 | GCA 903807295.1 | PDS000069340.1 |
| PDT000790989.2 | SAMEA4553279   | SAMEA4553279   | ERR3012815 | GCA 903807325.1 | PDS000069340.1 |
| PDT000790991.2 | SAMEA4553281   | SAMEA4553281   | ERR3012817 | GCA 903807345.1 | PDS000069340.1 |
| PDT000790994.2 | SAMEA4553284   | SAMEA4553284   | ERR3012820 | GCA 903807365.1 | PDS000069340.1 |
| PDT000790999.2 | SAMEA4553289   | SAMEA4553289   | ERR3012825 | GCA 903807415.1 | PDS000069340.1 |
| PDT000791000.2 | SAMEA4553290   | SAMEA4553290   | ERR3012826 | GCA 903807425.1 | PDS000069340.1 |
| PDT000791002.2 | SAMEA4553292   | SAMEA4553292   | ERR3012828 | GCA 903807445.1 | PDS000069340.1 |
| PDT000791004.2 | SAMEA4553294   | SAMEA4553294   | ERR3012830 | GCA 903807465.1 | PDS000069340.1 |
| PDT000791011.2 | SAMEA4553301   | SAMEA4553301   | ERR3012837 | GCA 903807535.1 | PDS000069340.1 |
| PDT000791019.2 | SAMEA4553309   | SAMEA4553309   | ERR3012845 | GCA 903807615.1 | PDS000069340.1 |
| PDT000791020.2 | SAMEA70047418  | SAMEA70047418  | ERR2506318 | GCA 903807625.1 | PDS000069340.1 |
| PDT000791021.2 | SAMEA70048168  | SAMEA70048168  | ERR2506319 | GCA 903807635.1 | PDS000069340.1 |
| PDT000791026.2 | SAMEA70051918  | SAMEA70051918  | ERR2506324 | GCA 903807685.1 | PDS000069340.1 |
| PDT000791037.2 | SAMEA70060168  | SAMEA70060168  | ERR2506335 | GCA 903807775.1 | PDS000069340.1 |
| PDT000791043.2 | SAMEA70064668  | SAMEA70064668  | ERR2506341 | GCA 903807855.1 | PDS000069340.1 |
| PDT000112116.2 | SAMEA1464675   | SAMEA1464675   | ERR118598  | GCA 900047505.1 | PDS000068193.1 |
| PDT000116372.2 | SAMEA1464200   | SAMEA1464200   | ERR118524  | GCA 900045565.1 | PDS000068193.1 |
| PDT000116410.2 | SAMEA1464412   | SAMEA1464412   | ERR124440  | GCA 900040855.1 | PDS000068193.1 |
| PDT000116818.2 | SAMEA1317547   | SAMEA1317547   | ERR107904  | GCA 900040075.1 | PDS000068193.1 |
| PDT000117557.2 | SAMEA1464413   | SAMEA1464413   | ERR118599  | GCA 900035735.1 | PDS000068193.1 |
| PDT000117728.2 | SAMEA1464316   | SAMEA1464316   | ERR118597  | GCA 900035745.1 | PDS000068193.1 |
| PDT000118192.2 | SAMEA1464205   | SAMEA1464205   | ERR118523  | GCA 900019095.1 | PDS000068193.1 |
| PDT000118706.2 | SAMEA1464239   | SAMEA1464239   | ERR118596  | GCA 900045725.1 | PDS000068193.1 |
| PDT000119292.2 | SAMEA1317524   | SAMEA1317524   | ERR107903  | GCA 900047225.1 | PDS000068193.1 |
| PDT000079461.2 | SAMEA1463394   | SAMEA1463394   | ERR156333  | GCA 001205035.1 | PDS000068205.1 |
| PDT000115916.2 | SAMEA1464565   | SAMEA1464565   | ERR118514  | GCA 900054465.1 | PDS000068205.1 |
| PDT000116322.2 | SAMEA1469721   | SAMEA1469721   | ERR223138  | GCA 900044525.1 | PDS000068205.1 |
| PDT000116344.2 | SAMEA1464247   | SAMEA1464247   | ERR118575  | GCA 900038295.1 | PDS000068205.1 |
| PDT000116686.2 | SAMEA1464686   | SAMEA1464686   | ERR118501  | GCA 900042265.1 | PDS000068205.1 |
| PDT000117153.2 | SAMEA1464497   | SAMEA1464497   | ERR134356  | GCA 900046085.1 | PDS000068205.1 |
| PDT000117192.2 | SAMEA1464391   | SAMEA1464391   | ERR118511  | GCA 900046075.1 | PDS000068205.1 |
| PDT000118012.2 | SAMEA1464363   | SAMEA1464363   | ERR118330  | GCA 900038525.1 | PDS000068205.1 |
| PDT000118957.2 | SAMEA1464716   | SAMEA1464716   | ERR118428  | GCA 900045065.1 | PDS000068205.1 |
| PDT000112118.2 | SAMEA1317341   | SAMEA1317341   | ERR107866  | GCA 900044915.1 | PDS000068082.1 |
| PDT000115988.2 | SAMEA1464553   | SAMEA1464553   | ERR129273  | GCA 900038395.1 | PDS000068082.1 |
| PDT000116960.2 | SAMEA1464484   | SAMEA1464484   | ERR223129  | GCA 900035725.1 | PDS000068082.1 |
| PDT000117309.2 | SAMEA1464548   | SAMEA1464548   | ERR129275  | GCA 900035905.1 | PDS000068082.1 |
| PDT000117518.2 | SAMEA1317552   | SAMEA1317552   | ERR107867  | GCA 900038505.1 | PDS000068082.1 |
| PDT000118101.2 | SAMEA1464507   | SAMEA1464507   | ERR118563  | GCA 900045655.1 | PDS000068082.1 |
| PDT000119315.2 | SAMEA1469580   | SAMEA1469580   | ERR158650  | GCA 900040945.1 | PDS000068082.1 |
| PDT000050126.2 | SAMN03198887   | SAMN03198887   | SRR1786257 | GCA 000877975.1 | PDS000068724.1 |
| PDT000193853.2 | SAMN06480665   | SAMN06480665   | SRR5320244 | GCA 002025145.1 | PDS000068724.1 |



|                |              |              |             |                 |                |
|----------------|--------------|--------------|-------------|-----------------|----------------|
| PDT000066792.3 | SAMN03255473 | SAMN03255473 | SRR1955854  | GCA 001019035.2 | PDS000068816.1 |
| PDT000080171.2 | SAMEA734672  | SAMEA734672  | ERR017177   | GCA 001227325.1 | PDS000068805.1 |
| PDT000116733.2 | SAMEA1317566 | SAMEA1317566 | ERR107818   | GCA 900040825.1 | PDS000068805.1 |
| PDT000119517.2 | SAMEA1317423 | SAMEA1317423 | ERR107817   | GCA 900043905.1 | PDS000068805.1 |
| PDT000343093.2 | SAMEA1469854 | SAMEA1469854 | ERR159008   | GCA 900483035.1 | PDS000068805.1 |
| PDT000343104.2 | SAMEA1469867 | SAMEA1469867 | ERR159004   | GCA 900482875.1 | PDS000068805.1 |
| PDT000343139.2 | SAMEA1469912 | SAMEA1469912 | ERR159006   | GCA 900482965.1 | PDS000068805.1 |
| PDT000116597.2 | SAMEA1317367 | SAMEA1317367 | ERR107863   | GCA 900045795.1 | PDS000068060.1 |
| PDT000117084.2 | SAMEA1464185 | SAMEA1464185 | ERR118404   | GCA 900018295.1 | PDS000068060.1 |
| PDT000117277.2 | SAMEA1464208 | SAMEA1464208 | ERR118496   | GCA 900041845.1 | PDS000068060.1 |
| PDT000117660.2 | SAMEA1464632 | SAMEA1464632 | ERR129269   | GCA 900047315.1 | PDS000068060.1 |
| PDT000118433.2 | SAMEA1464678 | SAMEA1464678 | ERR118498   | GCA 900042255.1 | PDS000068060.1 |
| PDT000108721.1 | SAMN03359450 | SAMN03359450 | SRR1814637  | GCA 015616625.1 | PDS000068757.1 |
| PDT000813874.1 | SAMN12775959 | SAMN12775959 | SRR10178943 | GCA 009461845.1 | PDS000068633.1 |
| PDT000115760.2 | SAMEA1464282 | SAMEA1464282 | ERR118549   | GCA 900040105.1 | PDS000068797.1 |
| PDT000118311.2 | SAMEA1464452 | SAMEA1464452 | ERR129293   | GCA 900047385.1 | PDS000068797.1 |
| PDT000118400.2 | SAMEA1317332 | SAMEA1317332 | ERR107911   | GCA 900038795.1 | PDS000068797.1 |
| PDT000118811.2 | SAMEA1464697 | SAMEA1464697 | ERR129326   | GCA 900044515.1 | PDS000068797.1 |
| PDT000343130.2 | SAMEA1469902 | SAMEA1469902 | ERR159022   | GCA 900482985.1 | PDS000068797.1 |
| PDT000326661.2 | SAMN07291565 | SAMN07291565 | SRR6985713  | GCA 003193665.1 | PDS000068766.1 |
| PDT000326667.2 | SAMN07291566 | SAMN07291566 | SRR6985715  | GCA 003193785.1 | PDS000068766.1 |
| PDT000353060.2 | SAMN07291569 | SAMN07291569 | SRR6985719  | GCA 003324235.1 | PDS000068766.1 |
| PDT000079065.2 | SAMEA1324759 | SAMEA1324759 | ERR134640   | GCA 001196675.1 | PDS000068704.1 |
| PDT000079343.2 | SAMEA1466534 | SAMEA1466534 | ERR137988   | GCA 001202535.1 | PDS000068704.1 |
| PDT000079463.2 | SAMEA1466495 | SAMEA1466495 | ERR137985   | GCA 001205075.1 | PDS000068704.1 |
| PDT000090511.2 | SAMEA1324764 | SAMEA1324764 | ERR134641   | GCA 001353315.1 | PDS000068704.1 |
| PDT000090547.2 | SAMEA1466516 | SAMEA1466516 | ERR137984   | GCA 001354035.1 | PDS000068704.1 |
| PDT000117400.2 | SAMEA1469617 | SAMEA1469617 | ERR158632   | GCA 900040935.1 | PDS000068800.1 |
| PDT000119224.2 | SAMEA1469555 | SAMEA1469555 | ERR158766   | GCA 900048255.1 | PDS000068800.1 |
| PDT000343121.2 | SAMEA1469890 | SAMEA1469890 | ERR159041   | GCA 900483355.1 | PDS000068800.1 |
| PDT000343169.2 | SAMEA1531676 | SAMEA1531676 | ERR177152   | GCA 900483775.1 | PDS000068800.1 |
| PDT000343182.2 | SAMEA1531689 | SAMEA1531689 | ERR177161   | GCA 900483665.1 | PDS000068800.1 |
| PDT000358267.2 | SAMN09724878 | SAMN09724878 | SRR7765198  | GCA 003353145.1 | PDS000068753.1 |
| PDT000358268.2 | SAMN09724879 | SAMN09724879 | SRR7765197  | GCA 003353135.1 | PDS000068753.1 |
| PDT000358272.2 | SAMN09724873 | SAMN09724873 | SRR7765196  | GCA 003353235.1 | PDS000068753.1 |
| PDT000358273.2 | SAMN09724876 | SAMN09724876 | SRR7765195  | GCA 003353265.1 | PDS000068753.1 |
| PDT000116593.2 | SAMEA1469685 | SAMEA1469685 | ERR158750   | GCA 900048205.1 | PDS000067894.1 |
| PDT000117860.2 | SAMEA1469570 | SAMEA1469570 | ERR158683   | GCA 900062775.1 | PDS000067894.1 |
| PDT000117884.2 | SAMEA1464522 | SAMEA1464522 | ERR124478   | GCA 900064575.1 | PDS000067894.1 |
| PDT000118795.2 | SAMEA1317352 | SAMEA1317352 | ERR111056   | GCA 900044095.1 | PDS000067894.1 |
| PDT000112141.2 | SAMEA1469560 | SAMEA1469560 | ERR158706   | GCA 900039045.1 | PDS000068071.1 |
| PDT000116260.2 | SAMEA1464446 | SAMEA1464446 | ERR118605   | GCA 900045735.1 | PDS000068071.1 |
| PDT000117020.2 | SAMEA1464390 | SAMEA1464390 | ERR124466   | GCA 900043605.1 | PDS000068071.1 |
| PDT000118924.2 | SAMEA1469659 | SAMEA1469659 | ERR158704   | GCA 900040175.1 | PDS000068071.1 |
| PDT000343097.2 | SAMEA1469860 | SAMEA1469860 | ERR159065   | GCA 900483535.1 | PDS000068794.1 |
| PDT000343174.2 | SAMEA1531681 | SAMEA1531681 | ERR177200   | GCA 900484165.1 | PDS000068794.1 |
| PDT000343209.2 | SAMEA1531722 | SAMEA1531722 | ERR177199   | GCA 900484125.1 | PDS000068794.1 |
| PDT000343217.2 | SAMEA1531734 | SAMEA1531734 | ERR177201   | GCA 900484295.1 | PDS000068794.1 |
| PDT000079181.2 | SAMEA1324528 | SAMEA1324528 | ERR134809   | GCA 001199135.1 | PDS000068771.1 |
| PDT000079448.2 | SAMEA1324756 | SAMEA1324756 | ERR134803   | GCA 001204755.1 | PDS000068771.1 |
| PDT000079658.2 | SAMEA1324510 | SAMEA1324510 | ERR134810   | GCA 001209205.1 | PDS000068771.1 |
| PDT000090489.2 | SAMEA1324707 | SAMEA1324707 | ERR134805   | GCA 001352875.1 | PDS000068771.1 |
| PDT000343179.2 | SAMEA1531686 | SAMEA1531686 | ERR177215   | GCA 900484075.1 | PDS000068787.1 |
| PDT000343194.2 | SAMEA1531704 | SAMEA1531704 | ERR177208   | GCA 900484365.1 | PDS000068787.1 |
| PDT000343213.2 | SAMEA1531730 | SAMEA1531730 | ERR177217   | GCA 900484225.1 | PDS000068787.1 |
| PDT000343218.2 | SAMEA1531735 | SAMEA1531735 | ERR177221   | GCA 900484095.1 | PDS000068787.1 |
| PDT000343062.2 | SAMEA1466865 | SAMEA1466865 | ERR156462   | GCA 900482925.1 | PDS000068792.1 |
| PDT000343163.2 | SAMEA1531667 | SAMEA1531667 | ERR177162   | GCA 900483625.1 | PDS000068792.1 |
| PDT000343175.2 | SAMEA1531682 | SAMEA1531682 | ERR177158   | GCA 900483575.1 | PDS000068792.1 |
| PDT000343221.2 | SAMEA1531738 | SAMEA1531738 | ERR177157   | GCA 900483565.1 | PDS000068792.1 |
| PDT000343091.2 | SAMEA1469852 | SAMEA1469852 | ERR158999   | GCA 900482675.1 | PDS000068803.1 |
| PDT000343113.2 | SAMEA1469882 | SAMEA1469882 | ERR159021   | GCA 900483025.1 | PDS000068803.1 |
| PDT000343183.2 | SAMEA1531690 | SAMEA1531690 | ERR177206   | GCA 900484325.1 | PDS000068803.1 |
| PDT000352913.2 | SAMEA1469845 | SAMEA1469845 | ERR159027   | GCA 900483265.1 | PDS000068803.1 |
| PDT000343089.2 | SAMEA1469849 | SAMEA1469849 | ERR158977   | GCA 900482775.1 | PDS000068802.1 |
| PDT000343108.2 | SAMEA1469874 | SAMEA1469874 | ERR158978   | GCA 900482905.1 | PDS000068802.1 |
| PDT000343117.2 | SAMEA1469886 | SAMEA1469886 | ERR158979   | GCA 900482735.1 | PDS000068802.1 |
| PDT000343167.2 | SAMEA1531674 | SAMEA1531674 | ERR177186   | GCA 900484085.1 | PDS000068802.1 |

|                |                |                |             |                 |                |
|----------------|----------------|----------------|-------------|-----------------|----------------|
| PDT000132804.2 | SAMEA2384833   | SAMEA2384833   | ERR554755   | GCA 900082655.1 | PDS000069449.1 |
| PDT000132908.2 | SAMEA2236458   | SAMEA2236458   | ERR422911   | GCA 900080645.1 | PDS000069449.1 |
| PDT000772575.2 | SAMEA103891450 | SAMEA103891450 | ERR2533680  | GCA 903802085.1 | PDS000069449.1 |
| PDT000772658.2 | SAMEA103891535 | SAMEA103891535 | ERR2533764  | GCA 903802945.1 | PDS000069449.1 |
| PDT000772390.2 | SAMEA103891263 | SAMEA103891263 | ERR2533494  | GCA 903811905.1 | PDS000069484.1 |
| PDT000772400.2 | SAMEA103891273 | SAMEA103891273 | ERR2533504  | GCA 903811995.1 | PDS000069484.1 |
| PDT000791233.2 | SAMEA70220668  | SAMEA70220668  | ERR2525250  | GCA 903809845.1 | PDS000069484.1 |
| PDT000791254.2 | SAMEA70236418  | SAMEA70236418  | ERR2525262  | GCA 903809975.1 | PDS000069484.1 |
| PDT000772393.2 | SAMEA103891266 | SAMEA103891266 | ERR2533497  | GCA 903811925.1 | PDS000069481.1 |
| PDT000772410.2 | SAMEA103891283 | SAMEA103891283 | ERR2533514  | GCA 903812115.1 | PDS000069481.1 |
| PDT000772419.2 | SAMEA103891293 | SAMEA103891293 | ERR2533524  | GCA 903812205.1 | PDS000069481.1 |
| PDT000772435.2 | SAMEA103891309 | SAMEA103891309 | ERR2533540  | GCA 903812455.1 | PDS000069481.1 |
| PDT000772394.2 | SAMEA103891267 | SAMEA103891267 | ERR2533498  | GCA 903811955.1 | PDS000069483.1 |
| PDT000772396.2 | SAMEA103891269 | SAMEA103891269 | ERR2533500  | GCA 903811945.1 | PDS000069483.1 |
| PDT000772402.2 | SAMEA103891275 | SAMEA103891275 | ERR2533506  | GCA 903812025.1 | PDS000069483.1 |
| PDT000772420.2 | SAMEA103891294 | SAMEA103891294 | ERR2533525  | GCA 903812215.1 | PDS000069483.1 |
| PDT000772437.2 | SAMEA103891311 | SAMEA103891311 | ERR2533542  | GCA 903812495.1 | PDS000069473.1 |
| PDT000772442.2 | SAMEA103891316 | SAMEA103891316 | ERR2533547  | GCA 903812595.1 | PDS000069473.1 |
| PDT000772446.2 | SAMEA103891320 | SAMEA103891320 | ERR2533551  | GCA 903812655.1 | PDS000069473.1 |
| PDT000772461.2 | SAMEA103891335 | SAMEA103891335 | ERR2533566  | GCA 903812835.1 | PDS000069473.1 |
| PDT000772742.2 | SAMEA4008480   | SAMEA4008480   | ERR1723860  | GCA 903798875.1 | PDS000069444.1 |
| PDT000772755.2 | SAMEA4008494   | SAMEA4008494   | ERR1723874  | GCA 903798985.1 | PDS000069444.1 |
| PDT000772759.2 | SAMEA4008498   | SAMEA4008498   | ERR1723878  | GCA 903799045.1 | PDS000069444.1 |
| PDT000772761.2 | SAMEA4008500   | SAMEA4008500   | ERR1723880  | GCA 903799055.1 | PDS000069444.1 |
| PDT000132788.2 | SAMEA2383921   | SAMEA2383921   | ERR554130   | GCA 900081275.1 | PDS000069479.1 |
| PDT000132820.2 | SAMEA2384327   | SAMEA2384327   | ERR554251   | GCA 900081465.1 | PDS000069479.1 |
| PDT000132830.2 | SAMEA2384319   | SAMEA2384319   | ERR554243   | GCA 900081515.1 | PDS000069479.1 |
| PDT000132853.2 | SAMEA2383929   | SAMEA2383929   | ERR554138   | GCA 900081305.1 | PDS000069479.1 |
| PDT000116334.2 | SAMEA1464226   | SAMEA1464226   | ERR118355   | GCA 900018035.1 | PDS000067816.1 |
| PDT000117528.2 | SAMEA1469596   | SAMEA1469596   | ERR158747   | GCA 900048195.1 | PDS000067816.1 |
| PDT000118096.2 | SAMEA1464356   | SAMEA1464356   | ERR134409   | GCA 900052635.1 | PDS000067816.1 |
| PDT000811664.1 | SAMEA4387623   | SAMEA4387623   | ERR1789234  | GCA 015576275.1 | PDS000067858.1 |
| PDT000811718.1 | SAMEA4387249   | SAMEA4387249   | ERR1789288  | GCA 015574795.1 | PDS000067858.1 |
| PDT000444195.1 | SAMEA53013418  | SAMEA53013418  | ERR2506119  | GCA 015606035.1 | PDS000067851.1 |
| PDT000444208.1 | SAMEA53023168  | SAMEA53023168  | ERR2506132  | GCA 015604985.1 | PDS000067851.1 |
| PDT000444245.1 | SAMEA53052418  | SAMEA53052418  | ERR2506169  | GCA 015605845.1 | PDS000067851.1 |
| PDT000811460.1 | SAMEA4387385   | SAMEA4387385   | ERR1789030  | GCA 015580535.1 | PDS000067852.1 |
| PDT000578280.2 | SAMN12618707   | SAMN12618707   | SRR10015256 | GCA 008123715.1 | PDS000068105.1 |
| PDT000578289.2 | SAMN12618706   | SAMN12618706   | SRR10015266 | GCA 008123905.1 | PDS000068105.1 |
| PDT000578290.2 | SAMN12618705   | SAMN12618705   | SRR10015267 | GCA 008123885.1 | PDS000068105.1 |
| PDT000589536.1 | SAMN04505181   | SAMN04505181   | SRR3194920  | GCA 015601555.1 | PDS000068538.1 |
| PDT000589537.1 | SAMN04505182   | SAMN04505182   | SRR3194921  | GCA 015601575.1 | PDS000068538.1 |
| PDT000766342.2 | SAMN14906846   | SAMN14906846   | SRR11787461 | GCA 013339425.1 | PDS000068510.1 |
| PDT000813740.1 | SAMN12776094   | SAMN12776094   | SRR10179137 | GCA 009459155.1 | PDS000068510.1 |
| PDT000813925.1 | SAMN12775908   | SAMN12775908   | SRR10178999 | GCA 009462865.1 | PDS000068510.1 |
| PDT000589515.1 | SAMN04505160   | SAMN04505160   | SRR3194899  | GCA 015601945.1 | PDS000068549.1 |
| PDT000589543.1 | SAMN04505188   | SAMN04505188   | SRR3194927  | GCA 015600905.1 | PDS000068549.1 |
| PDT000258932.2 | SAMN03763989   | SAMN03763989   | SRR5912682  | GCA 002633865.1 | PDS000069010.4 |
| PDT000629088.2 | SAMN03763989   | SAMN03763989   | SRR5912682  | GCA 009650155.1 | PDS000069010.4 |
| PDT000613398.2 | SAMD00164374   | SAMD00164374   | DRR170692   | GCA 009176765.1 | PDS000069050.1 |
| PDT000613399.2 | SAMD00164376   | SAMD00164376   | DRR170695   | GCA 009176785.1 | PDS000069050.1 |
| PDT000613400.2 | SAMD00164378   | SAMD00164378   | DRR170700   | GCA 009176875.1 | PDS000069050.1 |
| PDT000238760.2 | SAMN03893315   | SAMN03893315   | SRR5909261  | GCA 002273075.1 | PDS000069025.1 |
| PDT000238761.2 | SAMN03893314   | SAMN03893314   | SRR5909260  | GCA 002273065.1 | PDS000069025.1 |
| PDT000238819.2 | SAMN03893308   | SAMN03893308   | SRR5909243  | GCA 002274235.1 | PDS000069025.1 |
| PDT000766349.2 | SAMN14906839   | SAMN14906839   | SRR11787374 | GCA 013339565.1 | PDS000069513.1 |
| PDT000813815.1 | SAMN12776019   | SAMN12776019   | SRR10179221 | GCA 009460675.1 | PDS000069513.1 |
| PDT000813890.1 | SAMN12775946   | SAMN12775946   | SRR10178957 | GCA 009462145.1 | PDS000069513.1 |
| PDT000766293.2 | SAMN14906895   | SAMN14906895   | SRR11787425 | GCA 013338445.1 | PDS000069546.1 |
| PDT000813822.1 | SAMN12776011   | SAMN12776011   | SRR10179230 | GCA 009460825.1 | PDS000069546.1 |
| PDT000813841.1 | SAMN12775993   | SAMN12775993   | SRR10179249 | GCA 009461175.1 | PDS000069546.1 |
| PDT000766307.2 | SAMN14906881   | SAMN14906881   | SRR11787377 | GCA 013338725.1 | PDS000069535.1 |
| PDT000766311.2 | SAMN14906878   | SAMN14906878   | SRR11787380 | GCA 013338805.1 | PDS000069535.1 |
| PDT000813906.1 | SAMN12775927   | SAMN12775927   | SRR10178978 | GCA 009462455.1 | PDS000069535.1 |
| PDT000766327.2 | SAMN14906863   | SAMN14906863   | SRR11787413 | GCA 013339115.1 | PDS000069527.1 |
| PDT000813716.1 | SAMN12776117   | SAMN12776117   | SRR10179112 | GCA 009458685.1 | PDS000069527.1 |
| PDT000813962.1 | SAMN12775871   | SAMN12775871   | SRR10179196 | GCA 009463605.1 | PDS000069527.1 |
| PDT000766296.2 | SAMN14906891   | SAMN14906891   | SRR11787430 | GCA 013338505.1 | PDS000069543.1 |

|                |                |                |             |                 |                |
|----------------|----------------|----------------|-------------|-----------------|----------------|
| PDT000813828.1 | SAMN12776005   | SAMN12776005   | SRR10179236 | GCA 009460925.1 | PDS000069543.1 |
| PDT000813829.1 | SAMN12776004   | SAMN12776004   | SRR10179237 | GCA 009460965.1 | PDS000069543.1 |
| PDT000537232.1 | SAMN12190205   | SAMN12190205   | SRR9620941  | GCA 015604335.1 | PDS000069882.1 |
| PDT000537240.1 | SAMN12190446   | SAMN12190446   | SRR9620959  | GCA 015604365.1 | PDS000069882.1 |
| PDT000551271.1 | SAMN12414149   | SAMN12414149   | SRR9860552  | GCA 015603005.1 | PDS000069882.1 |
| PDT000619015.1 | SAMN12768910   | SAMN12768910   | SRR10127078 | GCA 015596365.1 | PDS000069869.1 |
| PDT000619024.1 | SAMN12768902   | SAMN12768902   | SRR10127087 | GCA 015596165.1 | PDS000069869.1 |
| PDT000619025.1 | SAMN12768901   | SAMN12768901   | SRR10127088 | GCA 015596105.1 | PDS000069869.1 |
| PDT000117361.2 | SAMEA1464186   | SAMEA1464186   | ERR118348   | GCA 900042015.1 | PDS000069878.1 |
| PDT000118786.2 | SAMEA1464486   | SAMEA1464486   | ERR134416   | GCA 900036915.1 | PDS000069878.1 |
| PDT000119522.2 | SAMEA1464419   | SAMEA1464419   | ERR118349   | GCA 900037815.1 | PDS000069878.1 |
| PDT000811851.1 | SAMEA4387566   | SAMEA4387566   | ERR1795539  | GCA 015572755.1 | PDS000067862.1 |
| PDT000423822.1 | SAMEA4469774   | SAMEA4469774   | ERR1853123  | GCA 015608245.1 | PDS000067869.1 |
| PDT000423823.1 | SAMEA4469775   | SAMEA4469775   | ERR1853124  | GCA 015606805.1 | PDS000067869.1 |
| PDT000423819.1 | SAMEA4469771   | SAMEA4469771   | ERR1853120  | GCA 015608285.1 | PDS000067870.1 |
| PDT000423820.1 | SAMEA4469772   | SAMEA4469772   | ERR1853121  | GCA 015607005.1 | PDS000067870.1 |
| PDT000811585.1 | SAMEA4387618   | SAMEA4387618   | ERR1789155  | GCA 015578545.1 | PDS000067864.1 |
| PDT000538437.1 | SAMEA104452154 | SAMEA104452154 | ERR2232654  | GCA 015603605.1 | PDS000067976.1 |
| PDT000132817.2 | SAMEA2384392   | SAMEA2384392   | ERR554315   | GCA 900081675.1 | PDS000067982.1 |
| PDT000166647.2 | SAMEA2445622   | SAMEA2445622   | ERR573325   | GCA 900083345.1 | PDS000067982.1 |
| PDT000343225.2 | SAMEA1531741   | SAMEA1531741   | ERR177184   | GCA 900484175.1 | PDS000068122.1 |
| PDT000116799.2 | SAMEA1317527   | SAMEA1317527   | ERR107802   | GCA 900045535.1 | PDS000068116.1 |
| PDT000118688.2 | SAMEA1464199   | SAMEA1464199   | ERR118591   | GCA 900047165.1 | PDS000068116.1 |
| PDT000116748.2 | SAMEA1464243   | SAMEA1464243   | ERR124445   | GCA 900017555.1 | PDS000068127.1 |
| PDT000343185.2 | SAMEA1531695   | SAMEA1531695   | ERR177165   | GCA 900483595.1 | PDS000068127.1 |
| PDT000115668.2 | SAMEA1317549   | SAMEA1317549   | ERR107931   | GCA 900048175.1 | PDS000068304.1 |
| PDT000118008.2 | SAMEA1317374   | SAMEA1317374   | ERR107951   | GCA 900048685.1 | PDS000068304.1 |
| PDT000164666.2 | SAMEA3109317   | SAMEA3109317   | ERR829967   | GCA 900097345.1 | PDS000068315.1 |
| PDT000164869.2 | SAMEA3109323   | SAMEA3109323   | ERR829973   | GCA 900097515.1 | PDS000068315.1 |
| PDT000766319.2 | SAMN14906867   | SAMN14906867   | SRR11787408 | GCA 013338985.1 | PDS000068473.1 |
| PDT000813943.1 | SAMN12775892   | SAMN12775892   | SRR10179016 | GCA 009463215.1 | PDS000068473.1 |
| PDT000766318.2 | SAMN14906869   | SAMN14906869   | SRR11787406 | GCA 013338945.1 | PDS000068485.1 |
| PDT000813939.1 | SAMN12775893   | SAMN12775893   | SRR10179015 | GCA 009463165.1 | PDS000068485.1 |
| PDT000782298.2 | SAMEA4008663   | SAMEA4008663   | ERR1715366  | GCA 903800625.1 | PDS000068471.1 |
| PDT000766306.2 | SAMN14906883   | SAMN14906883   | SRR11787375 | GCA 013338705.1 | PDS000068609.1 |
| PDT000813891.1 | SAMN12775942   | SAMN12775942   | SRR10178961 | GCA 009462205.1 | PDS000068609.1 |
| PDT000408048.2 | SAMN09847839   | SAMN09847839   | SRR7706354  | GCA 003719995.1 | PDS000068598.1 |
| PDT000408049.2 | SAMN09847838   | SAMN09847838   | SRR7706355  | GCA 003720015.1 | PDS000068598.1 |
| PDT000766351.2 | SAMN14906838   | SAMN14906838   | SRR11787385 | GCA 013339625.1 | PDS000068734.1 |
| PDT000813807.1 | SAMN12776026   | SAMN12776026   | SRR10179213 | GCA 009460515.1 | PDS000068734.1 |
| PDT000766277.2 | SAMN14906910   | SAMN14906910   | SRR11787393 | GCA 013338125.1 | PDS000068746.1 |
| PDT000813792.1 | SAMN12776041   | SAMN12776041   | SRR10179197 | GCA 009460225.1 | PDS000068746.1 |
| PDT000766337.2 | SAMN14906851   | SAMN14906851   | SRR11787456 | GCA 013339325.1 | PDS000068874.1 |
| PDT000813714.1 | SAMN12776118   | SAMN12776118   | SRR10179111 | GCA 009458675.1 | PDS000068874.1 |
| PDT000066800.3 | SAMN03255487   | SAMN03255487   | SRR1955931  | GCA 001019205.2 | PDS000068885.1 |
| PDT000066802.3 | SAMN03255441   | SAMN03255441   | SRR1955492  | GCA 001019255.2 | PDS000068885.1 |
| PDT000090455.2 | SAMEA1324600   | SAMEA1324600   | ERR134766   | GCA 001352195.1 | PDS000068883.1 |
| PDT000090505.2 | SAMEA1324746   | SAMEA1324746   | ERR134744   | GCA 001353195.1 | PDS000068883.1 |
| PDT000298224.2 | SAMN08689414   | SAMN08689414   | SRR6828686  | GCA 003011095.1 | PDS000068865.1 |
| PDT000466510.2 | SAMN08689413   | SAMN08689413   | SRR6828687  | GCA 004151625.1 | PDS000068865.1 |
| PDT000298221.2 | SAMN08689416   | SAMN08689416   | SRR6828688  | GCA 003011035.1 | PDS000068866.1 |
| PDT000298226.2 | SAMN08689417   | SAMN08689417   | SRR6828691  | GCA 003011145.1 | PDS000068866.1 |
| PDT000164711.2 | SAMEA2298746   | SAMEA2298746   | ERR505384   | GCA 900097695.1 | PDS000068871.1 |
| PDT000164847.2 | SAMEA2298703   | SAMEA2298703   | ERR505341   | GCA 900097655.1 | PDS000068871.1 |
| PDT000805002.2 | SAMEA6125687   | SAMEA6125687   | ERR3623560  | GCA 903987875.1 | PDS000069186.1 |
| PDT000805007.2 | SAMEA6125697   | SAMEA6125697   | ERR3623562  | GCA 903987925.1 | PDS000069186.1 |
| PDT000804992.2 | SAMEA6125871   | SAMEA6125871   | ERR3623803  | GCA 903987825.1 | PDS000069187.1 |
| PDT000804997.2 | SAMEA6125872   | SAMEA6125872   | ERR3623804  | GCA 903987785.1 | PDS000069187.1 |
| PDT000804974.2 | SAMEA6125844   | SAMEA6125844   | ERR3623782  | GCA 903987585.1 | PDS000069189.1 |
| PDT000804988.2 | SAMEA6125847   | SAMEA6125847   | ERR3623783  | GCA 903987725.1 | PDS000069189.1 |
| PDT000805016.2 | SAMEA6125700   | SAMEA6125700   | ERR3623572  | GCA 903987975.1 | PDS000069184.1 |
| PDT000805018.2 | SAMEA6125703   | SAMEA6125703   | ERR3623575  | GCA 903988035.1 | PDS000069184.1 |
| PDT000805076.2 | SAMEA6125927   | SAMEA6125927   | ERR3623863  | GCA 903988595.1 | PDS000069182.1 |
| PDT000805082.2 | SAMEA6125931   | SAMEA6125931   | ERR3623864  | GCA 903988665.1 | PDS000069182.1 |
| PDT000164599.2 | SAMEA3109319   | SAMEA3109319   | ERR829969   | GCA 900097565.1 | PDS000069179.1 |
| PDT000164705.2 | SAMEA3109324   | SAMEA3109324   | ERR829974   | GCA 900097465.1 | PDS000069179.1 |
| PDT000083688.2 | SAMEA2384846   | SAMEA2384846   | ERR554768   | GCA 001287585.1 | PDS000069170.1 |
| PDT000083795.2 | SAMEA2384862   | SAMEA2384862   | ERR554784   | GCA 001289745.1 | PDS000069170.1 |

|                |              |              |             |                 |                |
|----------------|--------------|--------------|-------------|-----------------|----------------|
| PDT000132916.2 | SAMEA2384828 | SAMEA2384828 | ERR554750   | GCA 900082615.1 | PDS000069357.1 |
| PDT000686750.2 | SAMN12251165 | SAMN12251165 | SRR10905592 | GCA 010599485.1 | PDS000069357.1 |
| PDT000132659.2 | SAMEA2383922 | SAMEA2383922 | ERR554131   | GCA 900081295.1 | PDS000069368.1 |
| PDT000132910.2 | SAMEA2384328 | SAMEA2384328 | ERR554252   | GCA 900081475.1 | PDS000069368.1 |
| PDT000790962.2 | SAMEA4553251 | SAMEA4553251 | ERR3012787  | GCA 903807045.1 | PDS000069349.1 |
| PDT000790963.2 | SAMEA4553252 | SAMEA4553252 | ERR3012788  | GCA 903807075.1 | PDS000069349.1 |
| PDT000170604.2 | SAMEA3449403 | SAMEA3449403 | ERR1069966  | GCA 900125805.1 | PDS000069356.1 |
| PDT000171096.2 | SAMEA3449404 | SAMEA3449404 | ERR1069967  | GCA 900125815.1 | PDS000069356.1 |
| PDT000790888.2 | SAMEA4553183 | SAMEA4553183 | ERR1891911  | GCA 903806315.1 | PDS000069355.1 |
| PDT000790906.2 | SAMEA4553194 | SAMEA4553194 | ERR1891922  | GCA 903806435.1 | PDS000069355.1 |
| PDT000790276.2 | SAMEA4008730 | SAMEA4008730 | ERR1715432  | GCA 903803115.1 | PDS000069358.1 |
| PDT000790899.2 | SAMEA4553187 | SAMEA4553187 | ERR1891915  | GCA 903806355.1 | PDS000069358.1 |
| PDT000790282.2 | SAMEA4008735 | SAMEA4008735 | ERR1715437  | GCA 903803145.1 | PDS000069363.1 |
| PDT000790823.2 | SAMEA4553165 | SAMEA4553165 | ERR1891894  | GCA 903806145.1 | PDS000069363.1 |
| PDT000766340.2 | SAMN14906847 | SAMN14906847 | SRR11787460 | GCA 013339385.1 | PDS000069520.1 |
| PDT000813738.1 | SAMN12776097 | SAMN12776097 | SRR10179134 | GCA 009459115.1 | PDS000069520.1 |
| PDT000766336.2 | SAMN14906853 | SAMN14906853 | SRR11787454 | GCA 013339305.1 | PDS000069521.1 |
| PDT000813698.1 | SAMN12776136 | SAMN12776136 | SRR10179307 | GCA 009458325.1 | PDS000069521.1 |
| PDT000766343.2 | SAMN14906845 | SAMN14906845 | SRR11787462 | GCA 013339445.1 | PDS000069518.1 |
| PDT000813750.1 | SAMN12776084 | SAMN12776084 | SRR10179148 | GCA 009459375.1 | PDS000069518.1 |
| PDT000766345.2 | SAMN14906841 | SAMN14906841 | SRR11787400 | GCA 013339485.1 | PDS000069515.1 |
| PDT000813821.1 | SAMN12776012 | SAMN12776012 | SRR10179228 | GCA 009460805.1 | PDS000069515.1 |
| PDT000766332.2 | SAMN14906856 | SAMN14906856 | SRR11787450 | GCA 013339225.1 | PDS000069522.1 |
| PDT000813711.1 | SAMN12776123 | SAMN12776123 | SRR10179105 | GCA 009458595.1 | PDS000069522.1 |
| PDT000766341.2 | SAMN14906849 | SAMN14906849 | SRR11787458 | GCA 013339405.1 | PDS000069519.1 |
| PDT000813743.1 | SAMN12776091 | SAMN12776091 | SRR10179141 | GCA 009459235.1 | PDS000069519.1 |
| PDT000132756.2 | SAMEA2384546 | SAMEA2384546 | ERR554468   | GCA 900082045.1 | PDS000069523.1 |
| PDT000132802.2 | SAMEA2384601 | SAMEA2384601 | ERR554523   | GCA 900082245.1 | PDS000069523.1 |
| PDT000070536.2 | SAMN03197054 | SAMN03197054 | SRR1655286  | GCA 001061935.1 | PDS000069606.1 |
| PDT000070547.2 | SAMN03197136 | SAMN03197136 | SRR1655368  | GCA 001062195.1 | PDS000069606.1 |
| PDT000070582.2 | SAMN03197410 | SAMN03197410 | SRR1655642  | GCA 001062965.1 | PDS000069600.1 |
| PDT000070623.2 | SAMN03197384 | SAMN03197384 | SRR1655616  | GCA 001063955.1 | PDS000069600.1 |
| PDT000070613.2 | SAMN03197771 | SAMN03197771 | SRR1656003  | GCA 001063705.1 | PDS000069595.1 |
| PDT000070741.2 | SAMN03198034 | SAMN03198034 | SRR1656266  | GCA 001066495.1 | PDS000069595.1 |
| PDT000070735.2 | SAMN03198021 | SAMN03198021 | SRR1656253  | GCA 001066345.1 | PDS000069596.1 |
| PDT000070816.2 | SAMN03198140 | SAMN03198140 | SRR1656372  | GCA 001068125.1 | PDS000069596.1 |
| PDT000070627.2 | SAMN03197420 | SAMN03197420 | SRR1655652  | GCA 001064065.1 | PDS000069598.1 |
| PDT000070672.2 | SAMN03197653 | SAMN03197653 | SRR1655885  | GCA 001065015.1 | PDS000069598.1 |
| PDT000070608.2 | SAMN03197705 | SAMN03197705 | SRR1655937  | GCA 001063595.1 | PDS000069604.1 |
| PDT000070684.2 | SAMN03197704 | SAMN03197704 | SRR1655936  | GCA 001065285.1 | PDS000069604.1 |
| PDT000070544.2 | SAMN03197115 | SAMN03197115 | SRR1655347  | GCA 001062115.1 | PDS000069607.1 |
| PDT000070546.2 | SAMN03197131 | SAMN03197131 | SRR1655363  | GCA 001062155.1 | PDS000069607.1 |
| PDT000070636.2 | SAMN03197459 | SAMN03197459 | SRR1655691  | GCA 001064215.1 | PDS000069599.1 |
| PDT000070639.2 | SAMN03197471 | SAMN03197471 | SRR1655703  | GCA 001064295.1 | PDS000069599.1 |
| PDT000132698.2 | SAMEA2384359 | SAMEA2384359 | ERR554282   | GCA 900081585.1 | PDS000069601.1 |
| PDT000132930.2 | SAMEA2383866 | SAMEA2383866 | ERR554076   | GCA 900081195.1 | PDS000069601.1 |
| PDT000812791.1 | SAMN10038907 | SAMN10038907 | SRR7839626  | GCA 015569875.1 | PDS000069919.1 |
| PDT000812797.1 | SAMN10038905 | SAMN10038905 | SRR7839636  | GCA 015569505.1 | PDS000069919.1 |
| PDT000812953.1 | SAMN10038818 | SAMN10038818 | SRR7840099  | GCA 015566455.1 | PDS000069929.1 |
| PDT000812967.1 | SAMN10038788 | SAMN10038788 | SRR7840130  | GCA 015566215.1 | PDS000069929.1 |
| PDT000812965.1 | SAMN10038790 | SAMN10038790 | SRR7840128  | GCA 015566185.1 | PDS000069933.1 |
| PDT000812795.1 | SAMN10038899 | SAMN10038899 | SRR7839634  | GCA 015568635.1 | PDS000069920.1 |
| PDT000812954.1 | SAMN10038825 | SAMN10038825 | SRR7840100  | GCA 015566435.1 | PDS000069920.1 |
| PDT000812850.1 | SAMN10038934 | SAMN10038934 | SRR7839817  | GCA 015568715.1 | PDS000069916.1 |
| PDT000812949.1 | SAMN10038943 | SAMN10038943 | SRR7840091  | GCA 015566535.1 | PDS000069916.1 |
| PDT000812728.1 | SAMN10038895 | SAMN10038895 | SRR7839414  | GCA 015571215.1 | PDS000069922.1 |
| PDT000812880.1 | SAMN10038810 | SAMN10038810 | SRR7839897  | GCA 015567695.1 | PDS000069922.1 |
| PDT000812729.1 | SAMN10038888 | SAMN10038888 | SRR7839415  | GCA 015571155.1 | PDS000069924.1 |
| PDT000812730.1 | SAMN10038889 | SAMN10038889 | SRR7839416  | GCA 015571095.1 | PDS000069924.1 |
| PDT000812783.1 | SAMN10038921 | SAMN10038921 | SRR7839605  | GCA 015570295.1 | PDS000069918.1 |
| PDT000812784.1 | SAMN10038920 | SAMN10038920 | SRR7839606  | GCA 015569755.1 | PDS000069918.1 |
| PDT000116592.2 | SAMEA1464547 | SAMEA1464547 | ERR118581   | GCA 900024995.1 | PDS000069934.1 |
| PDT000118530.2 | SAMEA1317525 | SAMEA1317525 | ERR107844   | GCA 900035765.1 | PDS000069934.1 |
| PDT000813655.1 | SAMN12776179 | SAMN12776179 | SRR10179087 | GCA 009457485.1 | PDS000072555.1 |
| PDT000278116.2 | SAMN04964640 | SAMN04964640 | SRR6484359  | GCA 001717725.2 | PDS000076797.1 |
| PDT000903141.1 | SAMN10689462 | SAMN10689462 | SRR11016772 | GCA 015713015.1 | PDS000076797.1 |
| PDT000904551.1 | SAMN11285100 | SAMN11285100 | SRR8810646  | GCA 015726495.1 | PDS000076875.1 |
| PDT000904552.1 | SAMN11285097 | SAMN11285097 | SRR8810011  | GCA 015726515.1 | PDS000076875.1 |

|                |              |              |             |                 |                |
|----------------|--------------|--------------|-------------|-----------------|----------------|
| PDT000904411.1 | SAMN09400917 | SAMN09400917 | SRR7296991  | GCA 015717565.1 | PDS000076878.1 |
| PDT000904632.1 | SAMN10435784 | SAMN10435784 | SRR8199066  | GCA 015728165.1 | PDS000076878.1 |
| PDT000904276.1 | SAMN09401058 | SAMN09401058 | SRR7297277  | GCA 015714845.1 | PDS000076885.1 |
| PDT000904650.1 | SAMN09401107 | SAMN09401107 | SRR7296836  | GCA 015728555.1 | PDS000076885.1 |
| PDT000904356.1 | SAMN09400975 | SAMN09400975 | SRR7297407  | GCA 015716465.1 | PDS000076883.1 |
| PDT000904361.1 | SAMN09400967 | SAMN09400967 | SRR7296988  | GCA 015716565.1 | PDS000076883.1 |
| PDT000904344.1 | SAMN09400987 | SAMN09400987 | SRR7297149  | GCA 015716225.1 | PDS000076879.1 |
| PDT000904405.1 | SAMN09400916 | SAMN09400916 | SRR7297000  | GCA 015717445.1 | PDS000076879.1 |
| PDT000904682.1 | SAMN09401073 | SAMN09401073 | SRR7297466  | GCA 015729195.1 | PDS000076877.1 |
| PDT000904691.1 | SAMN09401064 | SAMN09401064 | SRR7296769  | GCA 015729385.1 | PDS000076877.1 |
| PDT000904384.1 | SAMN09400943 | SAMN09400943 | SRR7297225  | GCA 015717015.1 | PDS000076881.1 |
| PDT000904554.1 | SAMN11285095 | SAMN11285095 | SRR8810226  | GCA 015726565.1 | PDS000076881.1 |
| PDT000904557.1 | SAMN11285094 | SAMN11285094 | SRR8810553  | GCA 015726615.1 | PDS000076884.1 |
| PDT000904639.1 | SAMN10435778 | SAMN10435778 | SRR8199060  | GCA 015728345.1 | PDS000076884.1 |
| PDT000551279.1 | SAMN12414143 | SAMN12414143 | SRR9860566  | GCA 015603045.1 | PDS000069851.1 |
| PDT000551280.1 | SAMN12414153 | SAMN12414153 | SRR9860567  | GCA 015602885.1 | PDS000069851.1 |
| PDT000551281.1 | SAMN12414156 | SAMN12414156 | SRR9860568  | GCA 015602965.1 | PDS000069851.1 |
| PDT000551301.1 | SAMN12414158 | SAMN12414158 | SRR9860589  | GCA 015602925.1 | PDS000069851.1 |
| PDT000551340.1 | SAMN12414144 | SAMN12414144 | SRR9860628  | GCA 015602825.1 | PDS000069851.1 |
| PDT000551352.1 | SAMN12414199 | SAMN12414199 | SRR9860641  | GCA 015602865.1 | PDS000069851.1 |
| PDT000551375.1 | SAMN12414151 | SAMN12414151 | SRR9860668  | GCA 015602945.1 | PDS000069851.1 |
| PDT000568578.1 | SAMN12610227 | SAMN12610227 | SRR10004513 | GCA 015602545.1 | PDS000069851.1 |
| PDT000655875.1 | SAMN13687280 | SAMN13687280 | SRR10842804 | GCA 015594365.1 | PDS000069851.1 |
| PDT000655876.1 | SAMN13687265 | SAMN13687265 | SRR10842811 | GCA 015594405.1 | PDS000069851.1 |
| PDT000655903.1 | SAMN13687273 | SAMN13687273 | SRR10842773 | GCA 015594325.1 | PDS000069851.1 |
| PDT000655904.1 | SAMN13687272 | SAMN13687272 | SRR10842774 | GCA 015594345.1 | PDS000069851.1 |
| PDT000655907.1 | SAMN13687269 | SAMN13687269 | SRR10842777 | GCA 015594285.1 | PDS000069851.1 |
| PDT000655917.1 | SAMN13687268 | SAMN13687268 | SRR10842788 | GCA 015593705.1 | PDS000069851.1 |
| PDT000655923.1 | SAMN13687289 | SAMN13687289 | SRR10842794 | GCA 015594125.1 | PDS000069851.1 |
| PDT000655924.1 | SAMN13687288 | SAMN13687288 | SRR10842795 | GCA 015594005.1 | PDS000069851.1 |
| PDT000655925.1 | SAMN13687287 | SAMN13687287 | SRR10842796 | GCA 015594085.1 | PDS000069851.1 |
| PDT000655926.1 | SAMN13687286 | SAMN13687286 | SRR10842797 | GCA 015594065.1 | PDS000069851.1 |
| PDT000655929.1 | SAMN13687284 | SAMN13687284 | SRR10842800 | GCA 015594025.1 | PDS000069851.1 |
| PDT000655934.1 | SAMN13687278 | SAMN13687278 | SRR10842806 | GCA 015593985.1 | PDS000069851.1 |
| PDT000655936.1 | SAMN13687276 | SAMN13687276 | SRR10842808 | GCA 015593955.1 | PDS000069851.1 |
| PDT000655937.1 | SAMN13687275 | SAMN13687275 | SRR10842809 | GCA 015593785.1 | PDS000069851.1 |
| PDT000655938.1 | SAMN13687266 | SAMN13687266 | SRR10842810 | GCA 015593815.1 | PDS000069851.1 |
| PDT000822318.1 | SAMEA3484376 | SAMEA3484376 | ERR961600   | GCA 015543315.1 | PDS000070378.1 |
| PDT000822319.1 | SAMEA3484377 | SAMEA3484377 | ERR961601   | GCA 015543295.1 | PDS000070378.1 |
| PDT000822320.1 | SAMEA3484378 | SAMEA3484378 | ERR961602   | GCA 015543235.1 | PDS000070378.1 |
| PDT000822321.1 | SAMEA3484379 | SAMEA3484379 | ERR961603   | GCA 015542905.1 | PDS000070378.1 |
| PDT000822322.1 | SAMEA3484380 | SAMEA3484380 | ERR961604   | GCA 015543195.1 | PDS000070378.1 |
| PDT000822323.1 | SAMEA3484381 | SAMEA3484381 | ERR961605   | GCA 015542895.1 | PDS000070378.1 |
| PDT000822324.1 | SAMEA3484382 | SAMEA3484382 | ERR961606   | GCA 015542545.1 | PDS000070378.1 |
| PDT000822325.1 | SAMEA3484383 | SAMEA3484383 | ERR961607   | GCA 015542625.1 | PDS000070378.1 |
| PDT000822326.1 | SAMEA3484384 | SAMEA3484384 | ERR961608   | GCA 015542675.1 | PDS000070378.1 |
| PDT000822327.1 | SAMEA3484385 | SAMEA3484385 | ERR961609   | GCA 015542755.1 | PDS000070378.1 |
| PDT000822328.1 | SAMEA3484386 | SAMEA3484386 | ERR961610   | GCA 015542815.1 | PDS000070378.1 |
| PDT000822329.1 | SAMEA3484387 | SAMEA3484387 | ERR961611   | GCA 015543255.1 | PDS000070378.1 |
| PDT000822330.1 | SAMEA3484388 | SAMEA3484388 | ERR961612   | GCA 015543215.1 | PDS000070378.1 |
| PDT000822331.1 | SAMEA3484389 | SAMEA3484389 | ERR961613   | GCA 015543035.1 | PDS000070378.1 |
| PDT000822332.1 | SAMEA3484390 | SAMEA3484390 | ERR961614   | GCA 015543115.1 | PDS000070378.1 |
| PDT000822333.1 | SAMEA3484391 | SAMEA3484391 | ERR961615   | GCA 015543135.1 | PDS000070378.1 |
| PDT000822335.1 | SAMEA3484393 | SAMEA3484393 | ERR961617   | GCA 015543155.1 | PDS000070378.1 |
| PDT000822336.1 | SAMEA3484394 | SAMEA3484394 | ERR961618   | GCA 015543095.1 | PDS000070378.1 |
| PDT000822337.1 | SAMEA3484395 | SAMEA3484395 | ERR961619   | GCA 015543175.1 | PDS000070378.1 |
| PDT000822338.1 | SAMEA3484396 | SAMEA3484396 | ERR961620   | GCA 015543055.1 | PDS000070378.1 |
| PDT000822339.1 | SAMEA3484397 | SAMEA3484397 | ERR961621   | GCA 015542975.1 | PDS000070378.1 |
| PDT000871127.1 | SAMN15541325 | SAMN15541325 | SRR12233380 | GCA 015541445.1 | PDS000074412.3 |
| PDT000871138.1 | SAMN15541324 | SAMN15541324 | SRR12233391 | GCA 015541345.1 | PDS000074412.3 |
| PDT000871149.1 | SAMN15541323 | SAMN15541323 | SRR12233402 | GCA 015541365.1 | PDS000074412.3 |
| PDT000871159.1 | SAMN15541376 | SAMN15541376 | SRR12233412 | GCA 015541205.1 | PDS000074412.3 |
| PDT000871160.1 | SAMN15541322 | SAMN15541322 | SRR12233413 | GCA 015541225.1 | PDS000074412.3 |
| PDT000871161.1 | SAMN15541375 | SAMN15541375 | SRR12233414 | GCA 015541265.1 | PDS000074412.3 |
| PDT000871162.1 | SAMN15541374 | SAMN15541374 | SRR12233415 | GCA 015541245.1 | PDS000074412.3 |
| PDT000871163.1 | SAMN15541373 | SAMN15541373 | SRR12233416 | GCA 015541185.1 | PDS000074412.3 |
| PDT000871164.1 | SAMN15541372 | SAMN15541372 | SRR12233417 | GCA 015541165.1 | PDS000074412.3 |
| PDT000871186.1 | SAMN15541352 | SAMN15541352 | SRR12233439 | GCA 015540945.1 | PDS000074412.3 |

|                |              |              |             |                 |                |
|----------------|--------------|--------------|-------------|-----------------|----------------|
| PDT000871187.1 | SAMN15541351 | SAMN15541351 | SRR12233440 | GCA 015541005.1 | PDS000074412.3 |
| PDT000871188.1 | SAMN15541350 | SAMN15541350 | SRR12233441 | GCA 015540785.1 | PDS000074412.3 |
| PDT000568584.1 | SAMN12610242 | SAMN12610242 | SRR10004852 | GCA 015602585.1 | PDS000067849.1 |
| PDT000568586.1 | SAMN12610313 | SAMN12610313 | SRR10005100 | GCA 015602555.1 | PDS000067849.1 |
| PDT000655902.1 | SAMN13687274 | SAMN13687274 | SRR10842772 | GCA 015594305.1 | PDS000067849.1 |
| PDT000655906.1 | SAMN13687270 | SAMN13687270 | SRR10842776 | GCA 015594145.1 | PDS000067849.1 |
| PDT000655927.1 | SAMN13687285 | SAMN13687285 | SRR10842798 | GCA 015593605.1 | PDS000067849.1 |
| PDT000655930.1 | SAMN13687283 | SAMN13687283 | SRR10842801 | GCA 015593885.1 | PDS000067849.1 |
| PDT000655931.1 | SAMN13687282 | SAMN13687282 | SRR10842802 | GCA 015593925.1 | PDS000067849.1 |
| PDT000655932.1 | SAMN13687281 | SAMN13687281 | SRR10842803 | GCA 015593905.1 | PDS000067849.1 |
| PDT000655933.1 | SAMN13687279 | SAMN13687279 | SRR10842805 | GCA 015594045.1 | PDS000067849.1 |
| PDT000108593.1 | SAMN03359321 | SAMN03359321 | SRR1814508  | GCA 015619085.1 | PDS000069454.1 |
| PDT000108772.1 | SAMN03359501 | SAMN03359501 | SRR1814688  | GCA 015615625.1 | PDS000069454.1 |
| PDT000108738.3 | SAMN03359467 | SAMN03359467 | SRR1814654  | GCA 015614725.1 | PDS000070017.1 |
| PDT000108765.1 | SAMN03359494 | SAMN03359494 | SRR1814681  | GCA 015614685.1 | PDS000070017.1 |
| PDT000108766.1 | SAMN03359495 | SAMN03359495 | SRR1814682  | GCA 015615765.1 | PDS000070017.1 |
| PDT000108767.1 | SAMN03359496 | SAMN03359496 | SRR1814683  | GCA 015615725.1 | PDS000070017.1 |
| PDT000108774.1 | SAMN03359503 | SAMN03359503 | SRR1814690  | GCA 015615665.1 | PDS000070017.1 |
| PDT000108782.1 | SAMN03359511 | SAMN03359511 | SRR1814698  | GCA 015615535.1 | PDS000070017.1 |
| PDT000108783.1 | SAMN03359512 | SAMN03359512 | SRR1814699  | GCA 015615525.1 | PDS000070017.1 |
| PDT000108784.1 | SAMN03359513 | SAMN03359513 | SRR1814700  | GCA 015615585.1 | PDS000070017.1 |
| PDT000108788.1 | SAMN03359517 | SAMN03359517 | SRR1814704  | GCA 015615505.1 | PDS000070017.1 |
| PDT000108789.1 | SAMN03359518 | SAMN03359518 | SRR1814705  | GCA 015615565.1 | PDS000070017.1 |
| PDT000108790.1 | SAMN03359519 | SAMN03359519 | SRR1814706  | GCA 015615385.1 | PDS000070017.1 |
| PDT000108791.1 | SAMN03359520 | SAMN03359520 | SRR1814707  | GCA 015615445.1 | PDS000070017.1 |
| PDT000080071.2 | SAMEA1030182 | SAMEA1030182 | ERR044597   | GCA 001223865.1 | PDS000069216.1 |
| PDT000115728.2 | SAMEA1464491 | SAMEA1464491 | ERR118600   | GCA 900038305.1 | PDS000069216.1 |
| PDT000115734.2 | SAMEA1317560 | SAMEA1317560 | ERR107875   | GCA 900045805.1 | PDS000069216.1 |
| PDT000116433.2 | SAMEA1469652 | SAMEA1469652 | ERR158695   | GCA 900040975.1 | PDS000069216.1 |
| PDT000116710.2 | SAMEA1317365 | SAMEA1317365 | ERR107972   | GCA 900040125.1 | PDS000069216.1 |
| PDT000116739.2 | SAMEA1317308 | SAMEA1317308 | ERR107907   | GCA 900020315.1 | PDS000069216.1 |
| PDT000116838.2 | SAMEA1464286 | SAMEA1464286 | ERR118571   | GCA 900038265.1 | PDS000069216.1 |
| PDT000117315.2 | SAMEA1464666 | SAMEA1464666 | ERR129322   | GCA 900018745.1 | PDS000069216.1 |
| PDT000117322.2 | SAMEA1464449 | SAMEA1464449 | ERR118573   | GCA 900038835.1 | PDS000069216.1 |
| PDT000117462.2 | SAMEA1469545 | SAMEA1469545 | ERR158773   | GCA 900043545.1 | PDS000069216.1 |
| PDT000118220.2 | SAMEA1317439 | SAMEA1317439 | ERR107812   | GCA 900047465.1 | PDS000069216.1 |
| PDT000118367.2 | SAMEA1469553 | SAMEA1469553 | ERR223143   | GCA 900046795.1 | PDS000069216.1 |
| PDT000790412.2 | SAMEA4552976 | SAMEA4552976 | ERR3012702  | GCA 903804335.1 | PDS000069394.1 |
| PDT000790413.2 | SAMEA4552977 | SAMEA4552977 | ERR3012703  | GCA 903804345.1 | PDS000069394.1 |
| PDT000790425.2 | SAMEA4552980 | SAMEA4552980 | ERR3012706  | GCA 903804375.1 | PDS000069394.1 |
| PDT000790430.2 | SAMEA4552981 | SAMEA4552981 | ERR3012707  | GCA 903804395.1 | PDS000069394.1 |
| PDT000790445.2 | SAMEA4552985 | SAMEA4552985 | ERR3012711  | GCA 903804425.1 | PDS000069394.1 |
| PDT000790451.2 | SAMEA4552986 | SAMEA4552986 | ERR3012712  | GCA 903804435.1 | PDS000069394.1 |
| PDT000790496.2 | SAMEA4552997 | SAMEA4552997 | ERR3012723  | GCA 903804545.1 | PDS000069394.1 |
| PDT000790544.2 | SAMEA4553009 | SAMEA4553009 | ERR3012735  | GCA 903804665.1 | PDS000069394.1 |
| PDT000790549.2 | SAMEA4553010 | SAMEA4553010 | ERR3012736  | GCA 903804675.1 | PDS000069394.1 |
| PDT000790557.2 | SAMEA4553012 | SAMEA4553012 | ERR3012738  | GCA 903804695.1 | PDS000069394.1 |
| PDT000790565.2 | SAMEA4553014 | SAMEA4553014 | ERR3012740  | GCA 903804725.1 | PDS000069394.1 |
| PDT000790580.2 | SAMEA4553027 | SAMEA4553027 | ERR1891759  | GCA 903804845.1 | PDS000069394.1 |
| PDT000108672.1 | SAMN03359400 | SAMN03359400 | SRR1814587  | GCA 015618165.1 | PDS000067777.1 |
| PDT000904280.1 | SAMN09401053 | SAMN09401053 | SRR7297288  | GCA 015714935.1 | PDS000076882.1 |
| PDT000904310.1 | SAMN09401020 | SAMN09401020 | SRR7297571  | GCA 015715545.1 | PDS000076882.1 |
| PDT000904350.1 | SAMN09400982 | SAMN09400982 | SRR7297160  | GCA 015716325.1 | PDS000076882.1 |
| PDT000904385.1 | SAMN09400942 | SAMN09400942 | SRR7297230  | GCA 015717045.1 | PDS000076882.1 |
| PDT000904395.1 | SAMN09400932 | SAMN09400932 | SRR7297539  | GCA 015717235.1 | PDS000076882.1 |
| PDT000904451.1 | SAMN13622097 | SAMN13622097 | SRR10728147 | GCA 015724505.1 | PDS000076882.1 |
| PDT000904605.1 | SAMN11285046 | SAMN11285046 | SRR8809974  | GCA 015727645.1 | PDS000076882.1 |
| PDT000904675.1 | SAMN09401081 | SAMN09401081 | SRR7297152  | GCA 015729065.1 | PDS000076882.1 |
| PDT000904688.1 | SAMN09401066 | SAMN09401066 | SRR7296865  | GCA 015729335.1 | PDS000076882.1 |
| PDT000079256.2 | SAMEA1324599 | SAMEA1324599 | ERR134869   | GCA 001200715.1 | PDS000068023.1 |
| PDT000079264.2 | SAMEA1710079 | SAMEA1710079 | ERR256885   | GCA 001200875.1 | PDS000068023.1 |
| PDT000079432.2 | SAMEA1324518 | SAMEA1324518 | ERR134778   | GCA 001204415.1 | PDS000068023.1 |
| PDT000079475.2 | SAMEA1710076 | SAMEA1710076 | ERR256884   | GCA 001205315.1 | PDS000068023.1 |
| PDT000079750.2 | SAMEA1324580 | SAMEA1324580 | ERR134870   | GCA 001211085.1 | PDS000068023.1 |
| PDT000079826.2 | SAMEA1324530 | SAMEA1324530 | ERR134776   | GCA 001212685.1 | PDS000068023.1 |
| PDT000090559.2 | SAMEA1466542 | SAMEA1466542 | ERR137916   | GCA 001354275.1 | PDS000068023.1 |
| PDT000090572.2 | SAMEA1710114 | SAMEA1710114 | ERR256883   | GCA 001354535.1 | PDS000068023.1 |
| PDT000080313.2 | SAMEA734679  | SAMEA734679  | ERR017179   | GCA 001232345.1 | PDS000067948.1 |

|                |              |              |             |                 |                |
|----------------|--------------|--------------|-------------|-----------------|----------------|
| PDT000115655.2 | SAMEA1317567 | SAMEA1317567 | ERR107916   | GCA 900047255.1 | PDS000067949.1 |
| PDT000115923.2 | SAMEA1317330 | SAMEA1317330 | ERR107826   | GCA 900019115.1 | PDS000067949.1 |
| PDT000115947.2 | SAMEA1469589 | SAMEA1469589 | ERR158707   | GCA 900040185.1 | PDS000067949.1 |
| PDT000117613.2 | SAMEA1317306 | SAMEA1317306 | ERR107825   | GCA 900044365.1 | PDS000067949.1 |
| PDT000117709.2 | SAMEA1464293 | SAMEA1464293 | ERR118372   | GCA 900038965.1 | PDS000067949.1 |
| PDT000117959.2 | SAMEA1317573 | SAMEA1317573 | ERR107919   | GCA 900038385.1 | PDS000067949.1 |
| PDT000117969.2 | SAMEA1568614 | SAMEA1568614 | ERR211896   | GCA 900033775.1 | PDS000067949.1 |
| PDT000119098.2 | SAMEA1317361 | SAMEA1317361 | ERR107827   | GCA 900041875.1 | PDS000067949.1 |
| PDT000822234.1 | SAMEA2724990 | SAMEA2724990 | ERR375865   | GCA 015543795.1 | PDS000069178.2 |
| PDT000822238.1 | SAMEA2724996 | SAMEA2724996 | ERR375870   | GCA 015543595.1 | PDS000069178.2 |
| PDT000822240.1 | SAMEA2724994 | SAMEA2724994 | ERR375984   | GCA 015543855.1 | PDS000069178.2 |
| PDT000116798.2 | SAMEA1317577 | SAMEA1317577 | ERR107788   | GCA 900019045.1 | PDS000069353.1 |
| PDT000790288.2 | SAMEA4008742 | SAMEA4008742 | ERR1715443  | GCA 903803215.1 | PDS000069353.1 |
| PDT000790294.2 | SAMEA4008748 | SAMEA4008748 | ERR1715449  | GCA 903803275.1 | PDS000069353.1 |
| PDT000790915.2 | SAMEA4553204 | SAMEA4553204 | ERR1891932  | GCA 903806565.1 | PDS000069353.1 |
| PDT000790930.2 | SAMEA4553219 | SAMEA4553219 | ERR3012755  | GCA 903806705.1 | PDS000069353.1 |
| PDT000790931.2 | SAMEA4553220 | SAMEA4553220 | ERR3012756  | GCA 903806725.1 | PDS000069353.1 |
| PDT000790932.2 | SAMEA4553221 | SAMEA4553221 | ERR3012757  | GCA 903806745.1 | PDS000069353.1 |
| PDT000819739.1 | SAMN15815295 | SAMN15815295 | SRR12693209 | GCA 014265725.1 | PDS000069190.2 |
| PDT000819746.1 | SAMN15815235 | SAMN15815235 | SRR12693277 | GCA 014266835.1 | PDS000069190.2 |
| PDT000819750.1 | SAMN15815231 | SAMN15815231 | SRR12693210 | GCA 014267105.1 | PDS000069190.2 |
| PDT000819752.1 | SAMN15815229 | SAMN15815229 | SRR12693232 | GCA 014267165.1 | PDS000069190.2 |
| PDT000819754.1 | SAMN15815227 | SAMN15815227 | SRR12693254 | GCA 014267285.1 | PDS000069190.2 |
| PDT000284235.2 | SAMN05977989 | SAMN05977989 | SRR5029779  | GCA 002902205.1 | PDS000069650.1 |
| PDT000531904.2 | SAMN11056488 | SAMN11056488 | SRR9641573  | GCA 006364675.1 | PDS000069650.1 |
| PDT000822042.1 | SAMN07674871 | SAMN07674871 | SRR6053634  | GCA 015545695.1 | PDS000070390.1 |
| PDT000822044.1 | SAMN07674872 | SAMN07674872 | SRR6053636  | GCA 015545655.1 | PDS000070390.1 |
| PDT000822046.1 | SAMN07674869 | SAMN07674869 | SRR6053638  | GCA 015545595.1 | PDS000070390.1 |
| PDT000822047.1 | SAMN07674870 | SAMN07674870 | SRR6053639  | GCA 015545615.1 | PDS000070390.1 |
| PDT000822120.1 | SAMN07674867 | SAMN07674867 | SRR6053712  | GCA 015543935.1 | PDS000070390.1 |
| PDT000822126.1 | SAMN07674868 | SAMN07674868 | SRR6053718  | GCA 015543975.1 | PDS000070390.1 |
| PDT000766316.2 | SAMN14906871 | SAMN14906871 | SRR11787404 | GCA 013338905.1 | PDS000068572.1 |
| PDT000813801.1 | SAMN12776033 | SAMN12776033 | SRR10179205 | GCA 009460395.1 | PDS000068572.1 |
| PDT000813852.1 | SAMN12775980 | SAMN12775980 | SRR10179264 | GCA 009461425.1 | PDS000068572.1 |
| PDT000813905.1 | SAMN12775928 | SAMN12775928 | SRR10178977 | GCA 009462465.1 | PDS000068572.1 |
| PDT000813929.1 | SAMN12775904 | SAMN12775904 | SRR10179003 | GCA 009462965.1 | PDS000068572.1 |
| PDT000164680.2 | SAMEA2298741 | SAMEA2298741 | ERR505379   | GCA 900097535.1 | PDS000068537.1 |
| PDT000164685.2 | SAMEA2298704 | SAMEA2298704 | ERR505342   | GCA 900097275.1 | PDS000068537.1 |
| PDT000164757.2 | SAMEA2298750 | SAMEA2298750 | ERR505388   | GCA 900097625.1 | PDS000068537.1 |
| PDT000164812.2 | SAMEA2298760 | SAMEA2298760 | ERR490632   | GCA 900097395.1 | PDS000068537.1 |
| PDT000164887.2 | SAMEA2298714 | SAMEA2298714 | ERR490586   | GCA 900097415.1 | PDS000068537.1 |
| PDT000904296.1 | SAMN09401034 | SAMN09401034 | SRR7296959  | GCA 015715265.1 | PDS000076921.1 |
| PDT000904345.1 | SAMN09400985 | SAMN09400985 | SRR7297163  | GCA 015716245.1 | PDS000076921.1 |
| PDT000904647.1 | SAMN09401109 | SAMN09401109 | SRR7297036  | GCA 015728485.1 | PDS000076921.1 |
| PDT000904667.1 | SAMN09401090 | SAMN09401090 | SRR7296974  | GCA 015728885.1 | PDS000076921.1 |
| PDT000904684.1 | SAMN09401070 | SAMN09401070 | SRR7297463  | GCA 015729245.1 | PDS000076921.1 |
| PDT000904436.1 | SAMN13622113 | SAMN13622113 | SRR10728128 | GCA 015724205.1 | PDS000076898.1 |
| PDT000904437.1 | SAMN13622112 | SAMN13622112 | SRR10728129 | GCA 015724235.1 | PDS000076898.1 |
| PDT000904528.1 | SAMN12220489 | SAMN12220489 | SRR9647292  | GCA 015726045.1 | PDS000076898.1 |
| PDT000904583.1 | SAMN11285065 | SAMN11285065 | SRR8810453  | GCA 015727215.1 | PDS000076898.1 |
| PDT000904610.1 | SAMN10435805 | SAMN10435805 | SRR8199307  | GCA 015727765.1 | PDS000076898.1 |
| PDT000108671.1 | SAMN03359399 | SAMN03359399 | SRR1814586  | GCA 015617085.1 | PDS000067821.1 |
| PDT000108817.1 | SAMN03359546 | SAMN03359546 | SRR1814733  | GCA 015614125.1 | PDS000067821.1 |
| PDT000117968.2 | SAMEA1464655 | SAMEA1464655 | ERR118371   | GCA 900051095.1 | PDS000067794.1 |
| PDT000118140.2 | SAMEA1568615 | SAMEA1568615 | ERR211895   | GCA 900033765.1 | PDS000067794.1 |
| PDT000118493.2 | SAMEA1317561 | SAMEA1317561 | ERR107918   | GCA 900047265.1 | PDS000067794.1 |
| PDT000119518.2 | SAMEA1317336 | SAMEA1317336 | ERR107831   | GCA 900048465.1 | PDS000067794.1 |
| PDT000108558.1 | SAMN03359286 | SAMN03359286 | SRR1814473  | GCA 015619315.1 | PDS000067798.1 |
| PDT000108560.1 | SAMN03359288 | SAMN03359288 | SRR1814475  | GCA 015619345.1 | PDS000067798.1 |
| PDT000108586.1 | SAMN03359314 | SAMN03359314 | SRR1814501  | GCA 015618885.1 | PDS000067798.1 |
| PDT000108594.1 | SAMN03359322 | SAMN03359322 | SRR1814509  | GCA 015619585.1 | PDS000067798.1 |
| PDT000811506.1 | SAMEA4387142 | SAMEA4387142 | ERR1789076  | GCA 015580175.1 | PDS000067856.1 |
| PDT000811845.1 | SAMEA4387482 | SAMEA4387482 | ERR1795533  | GCA 015572795.1 | PDS000067856.1 |
| PDT000066798.3 | SAMN03255484 | SAMN03255484 | SRR1955879  | GCA 001019175.2 | PDS000068732.1 |
| PDT000790291.2 | SAMEA4008745 | SAMEA4008745 | ERR1715446  | GCA 903803245.1 | PDS000068732.1 |
| PDT000766347.2 | SAMN14906840 | SAMN14906840 | SRR11787427 | GCA 013339515.1 | PDS000068672.1 |
| PDT000813754.1 | SAMN12776080 | SAMN12776080 | SRR10179153 | GCA 009459425.1 | PDS000068672.1 |
| PDT000813854.1 | SAMN12775981 | SAMN12775981 | SRR10179263 | GCA 009461435.1 | PDS000068672.1 |



|                |                |                |             |                 |                |
|----------------|----------------|----------------|-------------|-----------------|----------------|
| PDT000813856.1 | SAMN12775977   | SAMN12775977   | SRR10179267 | GCA 009461465.1 | PDS000068672.1 |
| PDT000766298.2 | SAMN14906890   | SAMN14906890   | SRR11787431 | GCA 013338545.1 | PDS000068685.1 |
| PDT000813833.1 | SAMN12776000   | SAMN12776000   | SRR10179242 | GCA 009461035.1 | PDS000068685.1 |
| PDT000813842.1 | SAMN12775989   | SAMN12775989   | SRR10179254 | GCA 009461235.1 | PDS000068685.1 |
| PDT000813849.1 | SAMN12775982   | SAMN12775982   | SRR10179261 | GCA 009461365.1 | PDS000068685.1 |
| PDT000079469.2 | SAMEA1324613   | SAMEA1324613   | ERR134851   | GCA 001205195.1 | PDS000068726.1 |
| PDT000079550.2 | SAMEA1466454   | SAMEA1466454   | ERR302798   | GCA 001206875.1 | PDS000068726.1 |
| PDT000090486.2 | SAMEA1324700   | SAMEA1324700   | ERR134848   | GCA 001352815.1 | PDS000068726.1 |
| PDT000090508.2 | SAMEA1324753   | SAMEA1324753   | ERR134817   | GCA 001353255.1 | PDS000068726.1 |
| PDT000164631.2 | SAMEA2298709   | SAMEA2298709   | ERR505347   | GCA 900097375.1 | PDS000068721.1 |
| PDT000164754.2 | SAMEA2298712   | SAMEA2298712   | ERR505350   | GCA 900097795.1 | PDS000068721.1 |
| PDT000164772.2 | SAMEA2298723   | SAMEA2298723   | ERR505361   | GCA 900097435.1 | PDS000068721.1 |
| PDT000164885.2 | SAMEA2298731   | SAMEA2298731   | ERR490603   | GCA 900097295.1 | PDS000068721.1 |
| PDT000371211.2 | SAMD00083457   | SAMD00083457   | DRR107097   | GCA 003417585.1 | PDS000068698.1 |
| PDT000371242.2 | SAMD00083483   | SAMD00083483   | DRR107123   | GCA 003418785.1 | PDS000068698.1 |
| PDT000371243.2 | SAMD00083484   | SAMD00083484   | DRR107124   | GCA 003418835.1 | PDS000068698.1 |
| PDT000371248.2 | SAMD00083488   | SAMD00083488   | DRR107128   | GCA 003419055.1 | PDS000068698.1 |
| PDT000790929.2 | SAMEA4553218   | SAMEA4553218   | ERR3012754  | GCA 903806695.1 | PDS000069352.1 |
| PDT000790933.2 | SAMEA4553222   | SAMEA4553222   | ERR3012758  | GCA 903806715.1 | PDS000069352.1 |
| PDT000791027.2 | SAMEA70052668  | SAMEA70052668  | ERR2506325  | GCA 903807695.1 | PDS000069352.1 |
| PDT000791047.2 | SAMEA70067668  | SAMEA70067668  | ERR2506345  | GCA 903807895.1 | PDS000069352.1 |
| PDT000790935.2 | SAMEA4553224   | SAMEA4553224   | ERR3012760  | GCA 903806765.1 | PDS000069337.1 |
| PDT000791028.2 | SAMEA70053418  | SAMEA70053418  | ERR2506326  | GCA 903807705.1 | PDS000069337.1 |
| PDT000791029.2 | SAMEA70054168  | SAMEA70054168  | ERR2506327  | GCA 903807725.1 | PDS000069337.1 |
| PDT000791035.2 | SAMEA70058668  | SAMEA70058668  | ERR2506333  | GCA 903807795.1 | PDS000069337.1 |
| PDT000119124.2 | SAMEA1464257   | SAMEA1464257   | ERR118450   | GCA 900039175.1 | PDS000069342.1 |
| PDT000790992.2 | SAMEA4553282   | SAMEA4553282   | ERR3012818  | GCA 903807335.1 | PDS000069342.1 |
| PDT000791022.2 | SAMEA70048918  | SAMEA70048918  | ERR2506320  | GCA 903807645.1 | PDS000069342.1 |
| PDT000791040.2 | SAMEA70062418  | SAMEA70062418  | ERR2506338  | GCA 903807825.1 | PDS000069342.1 |
| PDT000791264.2 | SAMEA70243918  | SAMEA70243918  | ERR2525271  | GCA 903810065.1 | PDS000069310.1 |
| PDT000791270.2 | SAMEA70248418  | SAMEA70248418  | ERR2525277  | GCA 903810135.1 | PDS000069310.1 |
| PDT000791281.2 | SAMEA70256668  | SAMEA70256668  | ERR2525288  | GCA 903810235.1 | PDS000069310.1 |
| PDT000791282.2 | SAMEA70257418  | SAMEA70257418  | ERR2525289  | GCA 903810245.1 | PDS000069310.1 |
| PDT000772368.2 | SAMEA103891241 | SAMEA103891241 | ERR2533472  | GCA 903811685.1 | PDS000069317.1 |
| PDT000772434.2 | SAMEA103891308 | SAMEA103891308 | ERR2533539  | GCA 903812445.1 | PDS000069317.1 |
| PDT000791220.2 | SAMEA70210918  | SAMEA70210918  | ERR2525244  | GCA 903809795.1 | PDS000069317.1 |
| PDT000791226.2 | SAMEA70215418  | SAMEA70215418  | ERR2525247  | GCA 903809825.1 | PDS000069317.1 |
| PDT000790961.2 | SAMEA4553250   | SAMEA4553250   | ERR3012786  | GCA 903807035.1 | PDS000069348.1 |
| PDT000790982.2 | SAMEA4553272   | SAMEA4553272   | ERR3012808  | GCA 903807255.1 | PDS000069348.1 |
| PDT000790987.2 | SAMEA4553277   | SAMEA4553277   | ERR3012813  | GCA 903807305.1 | PDS000069348.1 |
| PDT000791023.2 | SAMEA70049668  | SAMEA70049668  | ERR2506321  | GCA 903807655.1 | PDS000069348.1 |
| PDT000790938.2 | SAMEA4553227   | SAMEA4553227   | ERR3012763  | GCA 903806775.1 | PDS000069344.1 |
| PDT000790939.2 | SAMEA4553228   | SAMEA4553228   | ERR3012764  | GCA 903806795.1 | PDS000069344.1 |
| PDT000791008.2 | SAMEA4553298   | SAMEA4553298   | ERR3012834  | GCA 903807505.1 | PDS000069344.1 |
| PDT000791017.2 | SAMEA4553307   | SAMEA4553307   | ERR3012843  | GCA 903807605.1 | PDS000069344.1 |
| PDT000790928.2 | SAMEA4553217   | SAMEA4553217   | ERR3012753  | GCA 903806685.1 | PDS000069354.1 |
| PDT000790941.2 | SAMEA4553230   | SAMEA4553230   | ERR3012766  | GCA 903806805.1 | PDS000069354.1 |
| PDT000790942.2 | SAMEA4553231   | SAMEA4553231   | ERR3012767  | GCA 903806835.1 | PDS000069354.1 |
| PDT000790965.2 | SAMEA4553254   | SAMEA4553254   | ERR3012790  | GCA 903807055.1 | PDS000069354.1 |
| PDT000258928.2 | SAMN03763942   | SAMN03763942   | SRR5912677  | GCA 002633785.1 | PDS000076725.1 |
| PDT000852736.1 | SAMN12642197   | SAMN12642197   | SRR11016204 | GCA 014835465.1 | PDS000076914.1 |
| PDT000904231.1 | SAMN10689413   | SAMN10689413   | SRR8389081  | GCA 015713765.1 | PDS000076914.1 |
| PDT000904232.1 | SAMN10689411   | SAMN10689411   | SRR8389073  | GCA 015713805.1 | PDS000076914.1 |
| PDT000904315.1 | SAMN09401018   | SAMN09401018   | SRR7297245  | GCA 015715615.1 | PDS000076904.1 |
| PDT000904318.1 | SAMN09401012   | SAMN09401012   | SRR7297237  | GCA 015715705.1 | PDS000076904.1 |
| PDT000904354.1 | SAMN09400976   | SAMN09400976   | SRR7297406  | GCA 015716425.1 | PDS000076904.1 |
| PDT000904607.1 | SAMN10435809   | SAMN10435809   | SRR8198807  | GCA 015727675.1 | PDS000076904.1 |
| PDT000904457.1 | SAMN13622093   | SAMN13622093   | SRR10728151 | GCA 015724625.1 | PDS000076930.1 |
| PDT000904458.1 | SAMN13622088   | SAMN13622088   | SRR10728156 | GCA 015724645.1 | PDS000076930.1 |
| PDT000904626.1 | SAMN10435789   | SAMN10435789   | SRR8199677  | GCA 015728075.1 | PDS000076930.1 |
| PDT000904642.1 | SAMN10435777   | SAMN10435777   | SRR8199128  | GCA 015728405.1 | PDS000076930.1 |
| PDT000904444.1 | SAMN13622107   | SAMN13622107   | SRR10728135 | GCA 015724355.1 | PDS000076928.1 |
| PDT000904460.1 | SAMN13622087   | SAMN13622087   | SRR10728158 | GCA 015724685.1 | PDS000076928.1 |
| PDT000904538.1 | SAMN11285110   | SAMN11285110   | SRR8810182  | GCA 015726245.1 | PDS000076928.1 |
| PDT000904547.1 | SAMN11285105   | SAMN11285105   | SRR8809963  | GCA 015726385.1 | PDS000076928.1 |
| PDT000903142.1 | SAMN10689461   | SAMN10689461   | SRR8389041  | GCA 015713045.1 | PDS000076795.1 |
| PDT000903143.1 | SAMN10689460   | SAMN10689460   | SRR8389040  | GCA 015713055.1 | PDS000076795.1 |
| PDT000903144.1 | SAMN10689459   | SAMN10689459   | SRR8389037  | GCA 015713085.1 | PDS000076795.1 |

|                |               |               |             |                 |                |
|----------------|---------------|---------------|-------------|-----------------|----------------|
| PDT000903146.1 | SAMN10689458  | SAMN10689458  | SRR8389036  | GCA 015713115.1 | PDS000076795.1 |
| PDT000903130.1 | SAMN10689472  | SAMN10689472  | SRR8389096  | GCA 015712805.1 | PDS000076796.2 |
| PDT000903133.1 | SAMN10689471  | SAMN10689471  | SRR8389097  | GCA 015712865.1 | PDS000076796.2 |
| PDT000498539.2 | SAMN11458153  | SAMN11458153  | SRR8925272  | GCA 005047535.1 | PDS000068213.1 |
| PDT000498570.3 | SAMN11458142  | SAMN11458142  | SRR8925281  | GCA 005048335.2 | PDS000068213.1 |
| PDT000498600.2 | SAMN11458154  | SAMN11458154  | SRR8925271  | GCA 005049015.1 | PDS000068213.1 |
| PDT000589493.1 | SAMN04505138  | SAMN04505138  | SRR3194877  | GCA 015602425.1 | PDS000068560.1 |
| PDT000589521.1 | SAMN04505166  | SAMN04505166  | SRR3194905  | GCA 015601815.1 | PDS000068560.1 |
| PDT000298229.2 | SAMN08689424  | SAMN08689424  | SRR6828684  | GCA 003011195.1 | PDS000068574.1 |
| PDT000466560.2 | SAMN10838465  | SAMN10838465  | SRR8501281  | GCA 004152665.1 | PDS000068574.1 |
| PDT000476162.2 | SAMN10838466  | SAMN10838466  | SRR8501282  | GCA 004328135.1 | PDS000068574.1 |
| PDT000498577.3 | SAMN11458147  | SAMN11458147  | SRR8925275  | GCA 005048495.2 | PDS000068571.1 |
| PDT000498598.3 | SAMN11458146  | SAMN11458146  | SRR8925279  | GCA 005048965.2 | PDS000068571.1 |
| PDT000499941.3 | SAMN11458145  | SAMN11458145  | SRR8925280  | GCA 005146215.2 | PDS000068571.1 |
| PDT000476159.2 | SAMN10838463  | SAMN10838463  | SRR8501287  | GCA 004328115.1 | PDS000068566.1 |
| PDT000476160.2 | SAMN10838461  | SAMN10838461  | SRR8501285  | GCA 004328065.1 | PDS000068566.1 |
| PDT000476161.2 | SAMN10838462  | SAMN10838462  | SRR8501286  | GCA 004328105.1 | PDS000068566.1 |
| PDT000476155.2 | SAMN10838468  | SAMN10838468  | SRR8501284  | GCA 004328335.1 | PDS000068568.1 |
| PDT000476157.2 | SAMN10838469  | SAMN10838469  | SRR8501279  | GCA 004328305.1 | PDS000068568.1 |
| PDT000476158.2 | SAMN10838467  | SAMN10838467  | SRR8501283  | GCA 004328185.1 | PDS000068568.1 |
| PDT000066773.3 | SAMN03255442  | SAMN03255442  | SRR1955495  | GCA 001018645.2 | PDS000068887.1 |
| PDT000079160.2 | SAMEA1324758  | SAMEA1324758  | ERR134843   | GCA 001198695.1 | PDS000068859.1 |
| PDT000090454.2 | SAMEA1324594  | SAMEA1324594  | ERR134835   | GCA 001352175.1 | PDS000068859.1 |
| PDT000090462.2 | SAMEA1324611  | SAMEA1324611  | ERR134836   | GCA 001352335.1 | PDS000068859.1 |
| PDT000117494.2 | SAMEA1464616  | SAMEA1464616  | ERR118587   | GCA 900018685.1 | PDS000069347.1 |
| PDT000119476.2 | SAMEA1469666  | SAMEA1469666  | ERR158680   | GCA 900042115.1 | PDS000069347.1 |
| PDT000790990.2 | SAMEA4553280  | SAMEA4553280  | ERR3012816  | GCA 903807315.1 | PDS000069347.1 |
| PDT000790976.2 | SAMEA4553266  | SAMEA4553266  | ERR3012802  | GCA 903807185.1 | PDS000069343.1 |
| PDT000791009.2 | SAMEA4553299  | SAMEA4553299  | ERR3012835  | GCA 903807515.1 | PDS000069343.1 |
| PDT000791045.2 | SAMEA70066168 | SAMEA70066168 | ERR2506343  | GCA 903807875.1 | PDS000069343.1 |
| PDT000790968.2 | SAMEA4553257  | SAMEA4553257  | ERR3012793  | GCA 903807105.1 | PDS000069338.1 |
| PDT000791032.2 | SAMEA70056418 | SAMEA70056418 | ERR2506330  | GCA 903807745.1 | PDS000069338.1 |
| PDT000791033.2 | SAMEA70057168 | SAMEA70057168 | ERR2506331  | GCA 903807755.1 | PDS000069338.1 |
| PDT000079666.2 | SAMEA1463326  | SAMEA1463326  | ERR302666   | GCA 001209365.1 | PDS000069369.1 |
| PDT000790620.2 | SAMEA4553069  | SAMEA4553069  | ERR1891800  | GCA 903805255.1 | PDS000069369.1 |
| PDT000790754.2 | SAMEA4553144  | SAMEA4553144  | ERR1891873  | GCA 903805955.1 | PDS000069369.1 |
| PDT000090344.2 | SAMEA1463424  | SAMEA1463424  | ERR144843   | GCA 001349515.1 | PDS000069370.1 |
| PDT000790740.2 | SAMEA4553140  | SAMEA4553140  | ERR1891869  | GCA 903805915.1 | PDS000069370.1 |
| PDT000790747.2 | SAMEA4553142  | SAMEA4553142  | ERR1891871  | GCA 903805935.1 | PDS000069370.1 |
| PDT000132801.2 | SAMEA2384839  | SAMEA2384839  | ERR554761   | GCA 900082705.1 | PDS000069345.1 |
| PDT000132928.2 | SAMEA2384871  | SAMEA2384871  | ERR554793   | GCA 900082955.1 | PDS000069345.1 |
| PDT000132999.2 | SAMEA2384831  | SAMEA2384831  | ERR554753   | GCA 900082645.1 | PDS000069345.1 |
| PDT000791012.2 | SAMEA4553302  | SAMEA4553302  | ERR3012838  | GCA 903807525.1 | PDS000069336.1 |
| PDT000791013.2 | SAMEA4553303  | SAMEA4553303  | ERR3012839  | GCA 903807555.1 | PDS000069336.1 |
| PDT000791038.2 | SAMEA70060918 | SAMEA70060918 | ERR2506336  | GCA 903807805.1 | PDS000069336.1 |
| PDT000790692.2 | SAMEA4553122  | SAMEA4553122  | ERR1891853  | GCA 903805775.1 | PDS000069366.1 |
| PDT000790698.2 | SAMEA4553125  | SAMEA4553125  | ERR1891856  | GCA 903805805.1 | PDS000069366.1 |
| PDT000790769.2 | SAMEA4553148  | SAMEA4553148  | ERR1891877  | GCA 903805995.1 | PDS000069366.1 |
| PDT000790827.2 | SAMEA4553167  | SAMEA4553167  | ERR1891895  | GCA 903806165.1 | PDS000069362.1 |
| PDT000790842.2 | SAMEA4553171  | SAMEA4553171  | ERR1891899  | GCA 903806195.1 | PDS000069362.1 |
| PDT000790874.2 | SAMEA4553179  | SAMEA4553179  | ERR1891907  | GCA 903806275.1 | PDS000069362.1 |
| PDT000686813.2 | SAMN12251110  | SAMN12251110  | SRR10906031 | GCA 010603555.1 | PDS000069791.1 |
| PDT000686815.2 | SAMN12251109  | SAMN12251109  | SRR10906032 | GCA 010603595.1 | PDS000069791.1 |
| PDT000686816.2 | SAMN12251108  | SAMN12251108  | SRR10906034 | GCA 010603625.1 | PDS000069791.1 |
| PDT000670732.2 | SAMN10686914  | SAMN10686914  | SRR8385985  | GCA 009916325.1 | PDS000069803.1 |
| PDT000670733.2 | SAMN10686907  | SAMN10686907  | SRR8385986  | GCA 009916365.1 | PDS000069803.1 |
| PDT000670734.2 | SAMN10686906  | SAMN10686906  | SRR8385987  | GCA 009916405.1 | PDS000069803.1 |
| PDT000117129.2 | SAMEA1464720  | SAMEA1464720  | ERR118556   | GCA 900035705.1 | PDS000069812.1 |
| PDT000118287.2 | SAMEA1317331  | SAMEA1317331  | ERR107950   | GCA 900040905.1 | PDS000069812.1 |
| PDT000119000.2 | SAMEA1464537  | SAMEA1464537  | ERR223145   | GCA 900033745.1 | PDS000069812.1 |
| PDT000108578.1 | SAMN03359306  | SAMN03359306  | SRR1814493  | GCA 015618825.1 | PDS000067791.1 |
| PDT000108579.1 | SAMN03359307  | SAMN03359307  | SRR1814494  | GCA 015619725.1 | PDS000067791.1 |
| PDT000116510.2 | SAMEA1568607  | SAMEA1568607  | ERR211899   | GCA 900043655.1 | PDS000067793.1 |
| PDT000117362.2 | SAMEA1464671  | SAMEA1464671  | ERR124443   | GCA 900040885.1 | PDS000067793.1 |
| PDT000108567.1 | SAMN03359295  | SAMN03359295  | SRR1814482  | GCA 015618985.1 | PDS000067795.1 |
| PDT000108568.1 | SAMN03359296  | SAMN03359296  | SRR1814483  | GCA 015619145.1 | PDS000067795.1 |
| PDT000116959.2 | SAMEA1464572  | SAMEA1464572  | ERR129316   | GCA 900044945.1 | PDS000067938.1 |
| PDT000117736.2 | SAMEA1464597  | SAMEA1464597  | ERR118361   | GCA 900020375.1 | PDS000067938.1 |

|                |                |                |             |                 |                |
|----------------|----------------|----------------|-------------|-----------------|----------------|
| PDT000115725.2 | SAMEA1317472   | SAMEA1317472   | ERR111085   | GCA 900062145.1 | PDS000068138.1 |
| PDT000116742.2 | SAMEA1464248   | SAMEA1464248   | ERR124468   | GCA 900056665.1 | PDS000068138.1 |
| PDT000112311.2 | SAMEA1464482   | SAMEA1464482   | ERR118415   | GCA 900018305.1 | PDS000068371.1 |
| PDT000116245.2 | SAMEA1464376   | SAMEA1464376   | ERR118413   | GCA 900039065.1 | PDS000068371.1 |
| PDT000112283.2 | SAMEA1464471   | SAMEA1464471   | ERR134387   | GCA 900064505.1 | PDS000068382.1 |
| PDT000116714.2 | SAMEA1464460   | SAMEA1464460   | ERR134386   | GCA 900054445.1 | PDS000068382.1 |
| PDT000178166.2 | SAMN03893356   | SAMN03893356   | SRR5909230  | GCA 001936715.1 | PDS000068499.1 |
| PDT000766317.2 | SAMN14906872   | SAMN14906872   | SRR11787403 | GCA 013338925.1 | PDS000068498.1 |
| PDT000813927.1 | SAMN12775905   | SAMN12775905   | SRR10179002 | GCA 009462925.1 | PDS000068498.1 |
| PDT000813863.1 | SAMN12775971   | SAMN12775971   | SRR10178930 | GCA 009461635.1 | PDS000068645.1 |
| PDT000813879.1 | SAMN12775954   | SAMN12775954   | SRR10178948 | GCA 009461935.1 | PDS000068645.1 |
| PDT000079517.2 | SAMEA1466519   | SAMEA1466519   | ERR302792   | GCA 001206195.1 | PDS000068649.1 |
| PDT000090534.2 | SAMEA1466490   | SAMEA1466490   | ERR302795   | GCA 001353775.1 | PDS000068649.1 |
| PDT000371296.2 | SAMD00083533   | SAMD00083533   | DRR107173   | GCA 003420225.1 | PDS000068652.1 |
| PDT000371440.2 | SAMD00083675   | SAMD00083675   | DRR107315   | GCA 003423545.1 | PDS000068652.1 |
| PDT000164697.2 | SAMEA2298739   | SAMEA2298739   | ERR490611   | GCA 900097735.1 | PDS000068648.1 |
| PDT000164811.2 | SAMEA2298736   | SAMEA2298736   | ERR490608   | GCA 900097775.1 | PDS000068648.1 |
| PDT000371305.2 | SAMD00083542   | SAMD00083542   | DRR107182   | GCA 003420405.1 | PDS000068654.1 |
| PDT000371421.2 | SAMD00083656   | SAMD00083656   | DRR107296   | GCA 003422785.1 | PDS000068654.1 |
| PDT000371308.2 | SAMD00083545   | SAMD00083545   | DRR107185   | GCA 003420465.1 | PDS000068653.1 |
| PDT000371428.2 | SAMD00083663   | SAMD00083663   | DRR107303   | GCA 003422925.1 | PDS000068653.1 |
| PDT000766346.2 | SAMN14906843   | SAMN14906843   | SRR11787440 | GCA 013339505.1 | PDS000068785.1 |
| PDT000813758.1 | SAMN12776076   | SAMN12776076   | SRR10179157 | GCA 009459525.1 | PDS000068785.1 |
| PDT000066794.3 | SAMN03255476   | SAMN03255476   | SRR1955861  | GCA 001019065.2 | PDS000068922.1 |
| PDT000066791.3 | SAMN03255477   | SAMN03255477   | SRR1955864  | GCA 001019055.2 | PDS000068921.1 |
| PDT000066796.3 | SAMN03255480   | SAMN03255480   | SRR1955871  | GCA 001019135.2 | PDS000068920.1 |
| PDT000066788.3 | SAMN03255468   | SAMN03255468   | SRR1955829  | GCA 001018965.2 | PDS000068925.1 |
| PDT000790263.2 | SAMEA4008716   | SAMEA4008716   | ERR1715418  | GCA 903801895.1 | PDS000068925.1 |
| PDT000066783.3 | SAMN03255461   | SAMN03255461   | SRR1955806  | GCA 001018875.2 | PDS000068928.1 |
| PDT000790226.2 | SAMEA4008682   | SAMEA4008682   | ERR1715384  | GCA 903800915.1 | PDS000068928.1 |
| PDT000050086.2 | SAMN03202657   | SAMN03202657   | SRR1786282  | GCA 000877835.1 | PDS000068918.2 |
| PDT000066784.3 | SAMN03255465   | SAMN03255465   | SRR1955821  | GCA 001018905.2 | PDS000068926.1 |
| PDT000790245.2 | SAMEA4008700   | SAMEA4008700   | ERR1715402  | GCA 903801245.1 | PDS000068926.1 |
| PDT000083709.2 | SAMEA2384486   | SAMEA2384486   | ERR554408   | GCA 001288005.1 | PDS000069116.1 |
| PDT000083790.2 | SAMEA2383951   | SAMEA2383951   | ERR540155   | GCA 001289645.1 | PDS000069116.1 |
| PDT000083788.2 | SAMEA2384613   | SAMEA2384613   | ERR554535   | GCA 001289605.1 | PDS000069105.1 |
| PDT000083791.2 | SAMEA2384840   | SAMEA2384840   | ERR554762   | GCA 001289665.1 | PDS000069105.1 |
| PDT000132705.2 | SAMEA2383897   | SAMEA2383897   | ERR554106   | GCA 900081225.1 | PDS000069106.1 |
| PDT000132713.2 | SAMEA2384390   | SAMEA2384390   | ERR554313   | GCA 900081665.1 | PDS000069106.1 |
| PDT000800966.2 | SAMN15589960   | SAMN15589960   | SRR12282497 | GCA 013868395.1 | PDS000069193.1 |
| PDT000080327.2 | SAMEA1030209   | SAMEA1030209   | ERR045060   | GCA 001232985.1 | PDS000069200.1 |
| PDT000119381.2 | SAMEA1317512   | SAMEA1317512   | ERR107792   | GCA 900041865.1 | PDS000069200.1 |
| PDT000080430.2 | SAMEA1030324   | SAMEA1030324   | ERR044581   | GCA 001236745.1 | PDS000069196.1 |
| PDT000112023.2 | SAMEA1464402   | SAMEA1464402   | ERR129287   | GCA 900040735.1 | PDS000069196.1 |
| PDT000080329.2 | SAMEA734741    | SAMEA734741    | ERR017221   | GCA 001233125.1 | PDS000069199.1 |
| PDT000080424.2 | SAMEA734742    | SAMEA734742    | ERR017229   | GCA 001236485.1 | PDS000069199.1 |
| PDT000080241.2 | SAMEA1030181   | SAMEA1030181   | ERR044564   | GCA 001229725.1 | PDS000069204.1 |
| PDT000080257.2 | SAMEA1030177   | SAMEA1030177   | ERR044562   | GCA 001230185.1 | PDS000069204.1 |
| PDT000080191.2 | SAMEA734793    | SAMEA734793    | ERR017197   | GCA 001227965.1 | PDS000069197.1 |
| PDT000080382.2 | SAMEA734723    | SAMEA734723    | ERR017198   | GCA 001235185.1 | PDS000069197.1 |
| PDT000080330.2 | SAMEA1030255   | SAMEA1030255   | ERR044590   | GCA 001233145.1 | PDS000069198.1 |
| PDT000080492.2 | SAMEA1030157   | SAMEA1030157   | ERR044595   | GCA 001238845.1 | PDS000069198.1 |
| PDT000119100.2 | SAMEA1464508   | SAMEA1464508   | ERR118418   | GCA 900018315.1 | PDS000069413.1 |
| PDT000790238.2 | SAMEA4008694   | SAMEA4008694   | ERR1715396  | GCA 903801175.1 | PDS000069413.1 |
| PDT000772650.2 | SAMEA103891527 | SAMEA103891527 | ERR2533756  | GCA 903802835.1 | PDS000069409.1 |
| PDT000790266.2 | SAMEA4008719   | SAMEA4008719   | ERR1715421  | GCA 903801945.1 | PDS000069409.1 |
| PDT000790231.2 | SAMEA4008687   | SAMEA4008687   | ERR1715389  | GCA 903801045.1 | PDS000069414.1 |
| PDT000790408.2 | SAMEA4552972   | SAMEA4552972   | ERR3012698  | GCA 903804295.1 | PDS000069403.1 |
| PDT000790582.2 | SAMEA4553029   | SAMEA4553029   | ERR1891761  | GCA 903804865.1 | PDS000069403.1 |
| PDT000132776.2 | SAMEA2384876   | SAMEA2384876   | ERR554798   | GCA 900082965.1 | PDS000069401.1 |
| PDT000132903.2 | SAMEA2384821   | SAMEA2384821   | ERR554743   | GCA 900082565.1 | PDS000069401.1 |
| PDT000790423.2 | SAMEA4552979   | SAMEA4552979   | ERR3012705  | GCA 903804365.1 | PDS000069402.1 |
| PDT000790492.2 | SAMEA4552996   | SAMEA4552996   | ERR3012722  | GCA 903804525.1 | PDS000069402.1 |
| PDT000772553.2 | SAMEA103891428 | SAMEA103891428 | ERR2533658  | GCA 903801825.1 | PDS000069410.1 |
| PDT000790262.2 | SAMEA4008715   | SAMEA4008715   | ERR1715417  | GCA 903801815.1 | PDS000069410.1 |
| PDT000132899.2 | SAMEA2384534   | SAMEA2384534   | ERR554456   | GCA 900082005.1 | PDS000069412.1 |
| PDT000132940.2 | SAMEA2384535   | SAMEA2384535   | ERR554457   | GCA 900082015.1 | PDS000069412.1 |
| PDT000766322.2 | SAMN14906866   | SAMN14906866   | SRR11787409 | GCA 013339015.1 | PDS000069532.1 |

|                |              |              |             |                 |                |
|----------------|--------------|--------------|-------------|-----------------|----------------|
| PDT000813953.1 | SAMN12775880 | SAMN12775880 | SRR10179312 | GCA 009463405.1 | PDS000069532.1 |
| PDT000766325.2 | SAMN14906861 | SAMN14906861 | SRR11787415 | GCA 013339085.1 | PDS000069529.1 |
| PDT000813697.1 | SAMN12776137 | SAMN12776137 | SRR10179306 | GCA 009458305.1 | PDS000069529.1 |
| PDT000766323.2 | SAMN14906865 | SAMN14906865 | SRR11787410 | GCA 013339045.1 | PDS000069531.1 |
| PDT000813712.1 | SAMN12776120 | SAMN12776120 | SRR10179109 | GCA 009458625.1 | PDS000069531.1 |
| PDT000766330.2 | SAMN14906858 | SAMN14906858 | SRR11787448 | GCA 013339185.1 | PDS000069525.1 |
| PDT000813728.1 | SAMN12776105 | SAMN12776105 | SRR10179125 | GCA 009458925.1 | PDS000069525.1 |
| PDT000766331.2 | SAMN14906859 | SAMN14906859 | SRR11787417 | GCA 013339205.1 | PDS000069524.1 |
| PDT000813956.1 | SAMN12775875 | SAMN12775875 | SRR10179151 | GCA 009463485.1 | PDS000069524.1 |
| PDT000766329.2 | SAMN14906857 | SAMN14906857 | SRR11787449 | GCA 013339145.1 | PDS000069526.1 |
| PDT000813708.1 | SAMN12776125 | SAMN12776125 | SRR10179103 | GCA 009458535.1 | PDS000069526.1 |
| PDT000766324.2 | SAMN14906862 | SAMN14906862 | SRR11787414 | GCA 013339065.1 | PDS000069530.1 |
| PDT000813689.1 | SAMN12776143 | SAMN12776143 | SRR10179299 | GCA 009458155.1 | PDS000069530.1 |
| PDT000766321.2 | SAMN14906870 | SAMN14906870 | SRR11787405 | GCA 013339005.1 | PDS000069533.1 |
| PDT000813938.1 | SAMN12775895 | SAMN12775895 | SRR10179013 | GCA 009463125.1 | PDS000069533.1 |
| PDT000589505.1 | SAMN04505150 | SAMN04505150 | SRR3194889  | GCA 015602125.1 | PDS000070003.1 |
| PDT000589506.1 | SAMN04505151 | SAMN04505151 | SRR3194890  | GCA 015602055.1 | PDS000070003.1 |
| PDT000108794.1 | SAMN03359523 | SAMN03359523 | SRR1814710  | GCA 015616165.1 | PDS000070014.1 |
| PDT000108815.1 | SAMN03359544 | SAMN03359544 | SRR1814731  | GCA 015614205.1 | PDS000070014.1 |
| PDT000108799.1 | SAMN03359528 | SAMN03359528 | SRR1814715  | GCA 015616085.1 | PDS000070010.1 |
| PDT000108834.1 | SAMN03359563 | SAMN03359563 | SRR1814750  | GCA 015615405.1 | PDS000070010.1 |
| PDT000108810.1 | SAMN03359539 | SAMN03359539 | SRR1814726  | GCA 015615845.1 | PDS000070015.1 |
| PDT000108818.1 | SAMN03359547 | SAMN03359547 | SRR1814734  | GCA 015615825.1 | PDS000070015.1 |
| PDT000108776.1 | SAMN03359505 | SAMN03359505 | SRR1814692  | GCA 015614165.1 | PDS000070007.1 |
| PDT000108858.1 | SAMN03359587 | SAMN03359587 | SRR1814774  | GCA 015615205.1 | PDS000070007.1 |
| PDT000108823.1 | SAMN03359552 | SAMN03359552 | SRR1814739  | GCA 015614005.1 | PDS000070009.1 |
| PDT000108835.1 | SAMN03359564 | SAMN03359564 | SRR1814751  | GCA 015613705.1 | PDS000070009.1 |
| PDT000116968.2 | SAMEA1317353 | SAMEA1317353 | ERR107882   | GCA 900048145.1 | PDS000070011.1 |
| PDT000118186.2 | SAMEA1464629 | SAMEA1464629 | ERR129267   | GCA 900025025.1 | PDS000070011.1 |
| PDT000108863.1 | SAMN03359592 | SAMN03359592 | SRR1814779  | GCA 015612765.1 | PDS000070005.1 |
| PDT000108864.1 | SAMN03359593 | SAMN03359593 | SRR1814780  | GCA 015612785.1 | PDS000070005.1 |
| PDT000871116.1 | SAMN15541316 | SAMN15541316 | SRR12233369 | GCA 015541845.1 | PDS000074615.1 |
| PDT000871197.1 | SAMN15541342 | SAMN15541342 | SRR12233450 | GCA 015541685.1 | PDS000074615.1 |
| PDT000108559.1 | SAMN03359287 | SAMN03359287 | SRR1814474  | GCA 015619365.1 | PDS000067785.1 |
| PDT000108590.1 | SAMN03359318 | SAMN03359318 | SRR1814505  | GCA 015619545.1 | PDS000067785.1 |
| PDT000108592.1 | SAMN03359320 | SAMN03359320 | SRR1814507  | GCA 015619665.1 | PDS000067785.1 |
| PDT000108597.1 | SAMN03359325 | SAMN03359325 | SRR1814512  | GCA 015619445.1 | PDS000067785.1 |
| PDT000108600.1 | SAMN03359328 | SAMN03359328 | SRR1814515  | GCA 015619385.1 | PDS000067785.1 |
| PDT000108603.1 | SAMN03359331 | SAMN03359331 | SRR1814518  | GCA 015618765.1 | PDS000067785.1 |
| PDT000108633.1 | SAMN03359361 | SAMN03359361 | SRR1814548  | GCA 015617785.1 | PDS000067785.1 |
| PDT000108659.1 | SAMN03359387 | SAMN03359387 | SRR1814574  | GCA 015618385.1 | PDS000067785.1 |
| PDT000108683.1 | SAMN03359412 | SAMN03359412 | SRR1814599  | GCA 015616915.1 | PDS000067785.1 |
| PDT000108703.1 | SAMN03359432 | SAMN03359432 | SRR1814619  | GCA 015616285.1 | PDS000067785.1 |
| PDT000108708.1 | SAMN03359437 | SAMN03359437 | SRR1814624  | GCA 015616825.1 | PDS000067785.1 |
| PDT000108740.1 | SAMN03359469 | SAMN03359469 | SRR1814656  | GCA 015614555.1 | PDS000067785.1 |
| PDT000108769.1 | SAMN03359498 | SAMN03359498 | SRR1814685  | GCA 015615745.1 | PDS000067785.1 |
| PDT000108798.1 | SAMN03359527 | SAMN03359527 | SRR1814714  | GCA 015616105.1 | PDS000067785.1 |
| PDT000108822.1 | SAMN03359551 | SAMN03359551 | SRR1814738  | GCA 015614285.1 | PDS000067785.1 |
| PDT000790650.2 | SAMEA4553099 | SAMEA4553099 | ERR1891830  | GCA 903805555.1 | PDS000067785.1 |
| PDT000108763.1 | SAMN03359492 | SAMN03359492 | SRR1814679  | GCA 015614265.1 | PDS000068755.1 |
| PDT000108764.1 | SAMN03359493 | SAMN03359493 | SRR1814680  | GCA 015614505.1 | PDS000068755.1 |
| PDT000108860.1 | SAMN03359589 | SAMN03359589 | SRR1814776  | GCA 015612805.1 | PDS000068755.1 |
| PDT000108686.1 | SAMN03359415 | SAMN03359415 | SRR1814602  | GCA 015617905.1 | PDS000067762.1 |
| PDT000108691.1 | SAMN03359420 | SAMN03359420 | SRR1814607  | GCA 015617025.1 | PDS000067762.1 |
| PDT000108694.1 | SAMN03359423 | SAMN03359423 | SRR1814610  | GCA 015616885.1 | PDS000067762.1 |
| PDT000108699.1 | SAMN03359428 | SAMN03359428 | SRR1814615  | GCA 015616465.1 | PDS000067762.1 |
| PDT000108741.1 | SAMN03359470 | SAMN03359470 | SRR1814657  | GCA 015614585.1 | PDS000067762.1 |
| PDT000108744.1 | SAMN03359473 | SAMN03359473 | SRR1814660  | GCA 015614705.1 | PDS000067762.1 |
| PDT000108750.1 | SAMN03359479 | SAMN03359479 | SRR1814666  | GCA 015614855.1 | PDS000067762.1 |
| PDT000108751.1 | SAMN03359480 | SAMN03359480 | SRR1814667  | GCA 015614625.1 | PDS000067762.1 |
| PDT000108759.1 | SAMN03359488 | SAMN03359488 | SRR1814675  | GCA 015614805.1 | PDS000067762.1 |
| PDT000108760.1 | SAMN03359489 | SAMN03359489 | SRR1814676  | GCA 015614405.1 | PDS000067762.1 |
| PDT000108576.1 | SAMN03359304 | SAMN03359304 | SRR1814491  | GCA 015619825.1 | PDS000070021.1 |
| PDT000108685.1 | SAMN03359414 | SAMN03359414 | SRR1814601  | GCA 015617005.1 | PDS000070021.1 |
| PDT000108693.1 | SAMN03359422 | SAMN03359422 | SRR1814609  | GCA 015616905.1 | PDS000070021.1 |
| PDT000108700.1 | SAMN03359429 | SAMN03359429 | SRR1814616  | GCA 015616715.1 | PDS000070021.1 |
| PDT000108701.1 | SAMN03359430 | SAMN03359430 | SRR1814617  | GCA 015616585.1 | PDS000070021.1 |
| PDT000108702.1 | SAMN03359431 | SAMN03359431 | SRR1814618  | GCA 015616685.1 | PDS000070021.1 |

|                |              |              |             |                 |                |
|----------------|--------------|--------------|-------------|-----------------|----------------|
| PDT000108749.1 | SAMN03359478 | SAMN03359478 | SRR1814665  | GCA 015614885.1 | PDS000070021.1 |
| PDT000108752.1 | SAMN03359481 | SAMN03359481 | SRR1814668  | GCA 015614765.1 | PDS000070021.1 |
| PDT000108753.1 | SAMN03359482 | SAMN03359482 | SRR1814669  | GCA 015615025.1 | PDS000070021.1 |
| PDT000108761.1 | SAMN03359490 | SAMN03359490 | SRR1814677  | GCA 015614605.1 | PDS000070021.1 |
| PDT000108762.1 | SAMN03359491 | SAMN03359491 | SRR1814678  | GCA 015614645.1 | PDS000070021.1 |
| PDT000066775.3 | SAMN03255451 | SAMN03255451 | SRR1955607  | GCA 001018735.2 | PDS000068889.1 |
| PDT000066776.3 | SAMN03255449 | SAMN03255449 | SRR1955597  | GCA 001018725.2 | PDS000068889.1 |
| PDT000066778.3 | SAMN03255450 | SAMN03255450 | SRR1955598  | GCA 001018715.2 | PDS000068889.1 |
| PDT000066785.3 | SAMN03255466 | SAMN03255466 | SRR1955823  | GCA 001018915.2 | PDS000068889.1 |
| PDT000066786.3 | SAMN03255462 | SAMN03255462 | SRR1955809  | GCA 001018885.2 | PDS000068889.1 |
| PDT000066789.3 | SAMN03255467 | SAMN03255467 | SRR1955825  | GCA 001018955.2 | PDS000068889.1 |
| PDT000066790.3 | SAMN03255470 | SAMN03255470 | SRR1955845  | GCA 001019015.2 | PDS000068889.1 |
| PDT000066806.3 | SAMN03255452 | SAMN03255452 | SRR1955610  | GCA 001019335.2 | PDS000068889.1 |
| PDT000066810.3 | SAMN03255463 | SAMN03255463 | SRR1955816  | GCA 001019415.2 | PDS000068889.1 |
| PDT000066813.3 | SAMN03255472 | SAMN03255472 | SRR1955851  | GCA 001019475.2 | PDS000068889.1 |
| PDT000108867.1 | SAMN03359596 | SAMN03359596 | SRR1814783  | GCA 015613685.1 | PDS000068889.1 |
| PDT000108868.1 | SAMN03359597 | SAMN03359597 | SRR1814784  | GCA 015613665.1 | PDS000068889.1 |
| PDT000804831.2 | SAMN15594207 | SAMN15594207 | SRR12304294 | GCA 013912165.1 | PDS000068889.1 |
| PDT000804833.2 | SAMN15594203 | SAMN15594203 | SRR12304298 | GCA 013912185.1 | PDS000068889.1 |
| PDT000804834.2 | SAMN15594206 | SAMN15594206 | SRR12304295 | GCA 013912205.1 | PDS000068889.1 |
| PDT000804835.2 | SAMN15594205 | SAMN15594205 | SRR12304296 | GCA 013912225.1 | PDS000068889.1 |
| PDT000804836.2 | SAMN15594204 | SAMN15594204 | SRR12304297 | GCA 013912245.1 | PDS000068889.1 |
| PDT000804837.2 | SAMN15594202 | SAMN15594202 | SRR12304299 | GCA 013912265.1 | PDS000068889.1 |
| PDT000804838.2 | SAMN15594199 | SAMN15594199 | SRR12304302 | GCA 013912285.1 | PDS000068889.1 |
| PDT000804839.2 | SAMN15594200 | SAMN15594200 | SRR12304301 | GCA 013912275.1 | PDS000068889.1 |
| PDT000804840.2 | SAMN15594201 | SAMN15594201 | SRR12304300 | GCA 013912325.1 | PDS000068889.1 |
| PDT000804841.2 | SAMN15594198 | SAMN15594198 | SRR12304303 | GCA 013912335.1 | PDS000068889.1 |
| PDT000819732.1 | SAMN15815308 | SAMN15815308 | SRR12693195 | GCA 014265455.1 | PDS000068862.2 |
| PDT000819733.1 | SAMN15815305 | SAMN15815305 | SRR12693198 | GCA 014265495.1 | PDS000068862.2 |
| PDT000819734.1 | SAMN15815306 | SAMN15815306 | SRR12693197 | GCA 014265525.1 | PDS000068862.2 |
| PDT000819735.1 | SAMN15815304 | SAMN15815304 | SRR12693200 | GCA 014265565.1 | PDS000068862.2 |
| PDT000819736.1 | SAMN15815310 | SAMN15815310 | SRR12693193 | GCA 014265575.1 | PDS000068862.2 |
| PDT000819737.1 | SAMN15815303 | SAMN15815303 | SRR12693201 | GCA 014265625.1 | PDS000068862.2 |
| PDT000819738.1 | SAMN15815301 | SAMN15815301 | SRR12693203 | GCA 014265675.1 | PDS000068862.2 |
| PDT000819740.1 | SAMN15815309 | SAMN15815309 | SRR12693194 | GCA 014266165.1 | PDS000068862.2 |
| PDT000819741.1 | SAMN15815294 | SAMN15815294 | SRR12693211 | GCA 014266235.1 | PDS000068862.2 |
| PDT000819742.1 | SAMN15815253 | SAMN15815253 | SRR12693256 | GCA 014266585.1 | PDS000068862.2 |
| PDT000819743.1 | SAMN15815256 | SAMN15815256 | SRR12693252 | GCA 014266625.1 | PDS000068862.2 |
| PDT000819744.1 | SAMN15815252 | SAMN15815252 | SRR12693257 | GCA 014266645.1 | PDS000068862.2 |
| PDT000819745.1 | SAMN15815232 | SAMN15815232 | SRR12693199 | GCA 014266745.1 | PDS000068862.2 |
| PDT000819747.1 | SAMN15815234 | SAMN15815234 | SRR12693288 | GCA 014266825.1 | PDS000068862.2 |
| PDT000819748.1 | SAMN15815251 | SAMN15815251 | SRR12693258 | GCA 014266845.1 | PDS000068862.2 |
| PDT000819749.1 | SAMN15815233 | SAMN15815233 | SRR12693188 | GCA 014267035.1 | PDS000068862.2 |
| PDT000819751.1 | SAMN15815257 | SAMN15815257 | SRR12693251 | GCA 014267125.1 | PDS000068862.2 |
| PDT000819753.1 | SAMN15815228 | SAMN15815228 | SRR12693243 | GCA 014267255.1 | PDS000068862.2 |
| PDT000821999.1 | SAMN07674925 | SAMN07674925 | SRR6053591  | GCA 015546575.1 | PDS000070388.3 |
| PDT000822000.1 | SAMN07674926 | SAMN07674926 | SRR6053592  | GCA 015546535.1 | PDS000070388.3 |
| PDT000822001.1 | SAMN07674923 | SAMN07674923 | SRR6053593  | GCA 015546475.1 | PDS000070388.3 |
| PDT000822002.1 | SAMN07674924 | SAMN07674924 | SRR6053594  | GCA 015546435.1 | PDS000070388.3 |
| PDT000822003.1 | SAMN07674921 | SAMN07674921 | SRR6053595  | GCA 015546515.1 | PDS000070388.3 |
| PDT000822004.1 | SAMN07674922 | SAMN07674922 | SRR6053596  | GCA 015546455.1 | PDS000070388.3 |
| PDT000822006.1 | SAMN07674920 | SAMN07674920 | SRR6053598  | GCA 015546495.1 | PDS000070388.3 |
| PDT000822017.1 | SAMN07674929 | SAMN07674929 | SRR6053609  | GCA 015546015.1 | PDS000070388.3 |
| PDT000822039.1 | SAMN07674928 | SAMN07674928 | SRR6053631  | GCA 015545835.1 | PDS000070388.3 |
| PDT000822040.1 | SAMN07674927 | SAMN07674927 | SRR6053632  | GCA 015545725.1 | PDS000070388.3 |
| PDT000822079.1 | SAMN07674898 | SAMN07674898 | SRR6053671  | GCA 015544915.1 | PDS000070388.3 |
| PDT000822080.1 | SAMN07674897 | SAMN07674897 | SRR6053672  | GCA 015544795.1 | PDS000070388.3 |
| PDT000822083.1 | SAMN07674899 | SAMN07674899 | SRR6053675  | GCA 015544695.1 | PDS000070388.3 |
| PDT000822084.1 | SAMN07674900 | SAMN07674900 | SRR6053676  | GCA 015544575.1 | PDS000070388.3 |
| PDT000822085.1 | SAMN07674901 | SAMN07674901 | SRR6053677  | GCA 015544675.1 | PDS000070388.3 |
| PDT000822086.1 | SAMN07674902 | SAMN07674902 | SRR6053678  | GCA 015544735.1 | PDS000070388.3 |
| PDT000822087.1 | SAMN07674903 | SAMN07674903 | SRR6053679  | GCA 015544615.1 | PDS000070388.3 |
| PDT000822088.1 | SAMN07674904 | SAMN07674904 | SRR6053680  | GCA 015544515.1 | PDS000070388.3 |
| PDT000822089.1 | SAMN07674905 | SAMN07674905 | SRR6053681  | GCA 015544535.1 | PDS000070388.3 |
| PDT000822090.1 | SAMN07674906 | SAMN07674906 | SRR6053682  | GCA 015544435.1 | PDS000070388.3 |
| PDT000822091.1 | SAMN07674907 | SAMN07674907 | SRR6053683  | GCA 015544495.1 | PDS000070388.3 |
| PDT000822092.1 | SAMN07674908 | SAMN07674908 | SRR6053684  | GCA 015544475.1 | PDS000070388.3 |
| PDT000822108.1 | SAMN07674918 | SAMN07674918 | SRR6053700  | GCA 015544135.1 | PDS000070388.3 |

|                |              |              |             |                 |                |
|----------------|--------------|--------------|-------------|-----------------|----------------|
| PDT000822113.1 | SAMN07674915 | SAMN07674915 | SRR6053705  | GCA 015543575.1 | PDS000070388.3 |
| PDT000822114.1 | SAMN07674910 | SAMN07674910 | SRR6053706  | GCA 015543655.1 | PDS000070388.3 |
| PDT000822115.1 | SAMN07674909 | SAMN07674909 | SRR6053707  | GCA 015543395.1 | PDS000070388.3 |
| PDT000822116.1 | SAMN07674912 | SAMN07674912 | SRR6053708  | GCA 015543355.1 | PDS000070388.3 |
| PDT000822117.1 | SAMN07674911 | SAMN07674911 | SRR6053709  | GCA 015544115.1 | PDS000070388.3 |
| PDT000118294.2 | SAMEA3871514 | SAMEA3871514 | ERR1274626  | GCA 900067275.1 | PDS000068750.1 |
| PDT000772697.2 | SAMEA4008434 | SAMEA4008434 | ERR1723815  | GCA 903798425.1 | PDS000068750.1 |
| PDT000772714.2 | SAMEA4008452 | SAMEA4008452 | ERR1723832  | GCA 903798585.1 | PDS000068750.1 |
| PDT000772827.2 | SAMEA4008569 | SAMEA4008569 | ERR1723946  | GCA 903799765.1 | PDS000068750.1 |
| PDT000772828.2 | SAMEA4008570 | SAMEA4008570 | ERR1723947  | GCA 903799775.1 | PDS000068750.1 |
| PDT000772831.2 | SAMEA4008573 | SAMEA4008573 | ERR1723950  | GCA 903799715.1 | PDS000068750.1 |
| PDT000772833.2 | SAMEA4008575 | SAMEA4008575 | ERR1723952  | GCA 903799785.1 | PDS000068750.1 |
| PDT000772836.2 | SAMEA4008578 | SAMEA4008578 | ERR1723955  | GCA 903799805.1 | PDS000068750.1 |
| PDT000772837.2 | SAMEA4008579 | SAMEA4008579 | ERR1723956  | GCA 903799825.1 | PDS000068750.1 |
| PDT000772840.2 | SAMEA4008582 | SAMEA4008582 | ERR1723959  | GCA 903799855.1 | PDS000068750.1 |
| PDT000772841.2 | SAMEA4008583 | SAMEA4008583 | ERR1723960  | GCA 903799875.1 | PDS000068750.1 |
| PDT000772843.2 | SAMEA4008585 | SAMEA4008585 | ERR1723962  | GCA 903799885.1 | PDS000068750.1 |
| PDT000772848.2 | SAMEA4008590 | SAMEA4008590 | ERR1723967  | GCA 903799925.1 | PDS000068750.1 |
| PDT000686769.2 | SAMN12251144 | SAMN12251144 | SRR10905838 | GCA 010599845.1 | PDS000068810.1 |
| PDT000766300.2 | SAMN14906889 | SAMN14906889 | SRR11787432 | GCA 013338585.1 | PDS000068810.1 |
| PDT000766320.2 | SAMN14906868 | SAMN14906868 | SRR11787407 | GCA 013338965.1 | PDS000068810.1 |
| PDT000766339.2 | SAMN14906848 | SAMN14906848 | SRR11787459 | GCA 013339365.1 | PDS000068810.1 |
| PDT000813732.1 | SAMN12776100 | SAMN12776100 | SRR10179131 | GCA 009459025.1 | PDS000068810.1 |
| PDT000813771.1 | SAMN12776062 | SAMN12776062 | SRR10179172 | GCA 009459805.1 | PDS000068810.1 |
| PDT000813780.1 | SAMN12776053 | SAMN12776053 | SRR10179182 | GCA 009459975.1 | PDS000068810.1 |
| PDT000813834.1 | SAMN12775999 | SAMN12775999 | SRR10179243 | GCA 009461065.1 | PDS000068810.1 |
| PDT000813895.1 | SAMN12775937 | SAMN12775937 | SRR10178967 | GCA 009462275.1 | PDS000068810.1 |
| PDT000813901.1 | SAMN12775935 | SAMN12775935 | SRR10178969 | GCA 009462375.1 | PDS000068810.1 |
| PDT000813918.1 | SAMN12775915 | SAMN12775915 | SRR10178991 | GCA 009462745.1 | PDS000068810.1 |
| PDT000813923.1 | SAMN12775910 | SAMN12775910 | SRR10178997 | GCA 009462835.1 | PDS000068810.1 |
| PDT000813937.1 | SAMN12775896 | SAMN12775896 | SRR10179012 | GCA 009463115.1 | PDS000068810.1 |
| PDT000813940.1 | SAMN12775894 | SAMN12775894 | SRR10179014 | GCA 009463175.1 | PDS000068810.1 |
| PDT000813973.1 | SAMN12775863 | SAMN12775863 | SRR10178940 | GCA 009463785.1 | PDS000068810.1 |
| PDT000238768.2 | SAMN03893235 | SAMN03893235 | SRR5909177  | GCA 002273225.1 | PDS000069021.1 |
| PDT000238769.2 | SAMN03893237 | SAMN03893237 | SRR5909268  | GCA 002273255.1 | PDS000069021.1 |
| PDT000238770.2 | SAMN03893239 | SAMN03893239 | SRR5909255  | GCA 002273265.1 | PDS000069021.1 |
| PDT000238771.2 | SAMN03893241 | SAMN03893241 | SRR5909213  | GCA 002273245.1 | PDS000069021.1 |
| PDT000238772.2 | SAMN03893242 | SAMN03893242 | SRR5909210  | GCA 002273305.1 | PDS000069021.1 |
| PDT000238773.2 | SAMN03893246 | SAMN03893246 | SRR5909206  | GCA 002273325.1 | PDS000069021.1 |
| PDT000238774.2 | SAMN03893244 | SAMN03893244 | SRR5909208  | GCA 002273335.1 | PDS000069021.1 |
| PDT000238776.2 | SAMN03893248 | SAMN03893248 | SRR5909204  | GCA 002273385.1 | PDS000069021.1 |
| PDT000238857.2 | SAMN03893234 | SAMN03893234 | SRR5909269  | GCA 002275035.1 | PDS000069021.1 |
| PDT000238858.2 | SAMN03893233 | SAMN03893233 | SRR5909249  | GCA 002275045.1 | PDS000069021.1 |
| PDT000238861.2 | SAMN03893243 | SAMN03893243 | SRR5909211  | GCA 002275115.1 | PDS000069021.1 |
| PDT000238862.2 | SAMN03893238 | SAMN03893238 | SRR5909254  | GCA 002275105.1 | PDS000069021.1 |
| PDT000238863.2 | SAMN03893247 | SAMN03893247 | SRR5909207  | GCA 002275135.1 | PDS000069021.1 |
| PDT000238864.2 | SAMN03893240 | SAMN03893240 | SRR5909212  | GCA 002275125.1 | PDS000069021.1 |
| PDT000238867.2 | SAMN03893249 | SAMN03893249 | SRR5909205  | GCA 002275195.1 | PDS000069021.1 |
| PDT000090391.2 | SAMEA1569566 | SAMEA1569566 | ERR212191   | GCA 001350915.1 | PDS000068735.1 |
| PDT000090392.2 | SAMEA1569568 | SAMEA1569568 | ERR212199   | GCA 001350935.1 | PDS000068735.1 |
| PDT000090395.2 | SAMEA1569577 | SAMEA1569577 | ERR212192   | GCA 001350995.1 | PDS000068735.1 |
| PDT000090401.2 | SAMEA1569593 | SAMEA1569593 | ERR212193   | GCA 001351115.1 | PDS000068735.1 |
| PDT000090403.2 | SAMEA1569597 | SAMEA1569597 | ERR212195   | GCA 001351155.1 | PDS000068735.1 |
| PDT000090404.2 | SAMEA1569598 | SAMEA1569598 | ERR212188   | GCA 001351175.1 | PDS000068735.1 |
| PDT000090408.2 | SAMEA1569608 | SAMEA1569608 | ERR212186   | GCA 001351255.1 | PDS000068735.1 |
| PDT000090412.2 | SAMEA1569625 | SAMEA1569625 | ERR212187   | GCA 001351335.1 | PDS000068735.1 |
| PDT000090414.2 | SAMEA1569630 | SAMEA1569630 | ERR212198   | GCA 001351375.1 | PDS000068735.1 |
| PDT000090415.2 | SAMEA1569631 | SAMEA1569631 | ERR212189   | GCA 001351395.1 | PDS000068735.1 |
| PDT000090416.2 | SAMEA1569632 | SAMEA1569632 | ERR212184   | GCA 001351415.1 | PDS000068735.1 |
| PDT000090421.2 | SAMEA1569641 | SAMEA1569641 | ERR212190   | GCA 001351515.1 | PDS000068735.1 |
| PDT000090422.2 | SAMEA1569644 | SAMEA1569644 | ERR212185   | GCA 001351535.1 | PDS000068735.1 |
| PDT000790286.2 | SAMEA4008740 | SAMEA4008740 | ERR1715441  | GCA 903803195.1 | PDS000068735.1 |
| PDT000812772.1 | SAMN10038806 | SAMN10038806 | SRR7839594  | GCA 015570395.1 | PDS000069932.1 |
| PDT000812777.1 | SAMN10038799 | SAMN10038799 | SRR7839599  | GCA 015570035.1 | PDS000069932.1 |
| PDT000812779.1 | SAMN10038801 | SAMN10038801 | SRR7839601  | GCA 015569995.1 | PDS000069932.1 |
| PDT000812801.1 | SAMN10038820 | SAMN10038820 | SRR7839650  | GCA 015568855.1 | PDS000069932.1 |
| PDT000812816.1 | SAMN10038757 | SAMN10038757 | SRR7839706  | GCA 015568915.1 | PDS000069932.1 |
| PDT000812911.1 | SAMN10038759 | SAMN10038759 | SRR7839984  | GCA 015567315.1 | PDS000069932.1 |

|                |               |               |             |                 |                |
|----------------|---------------|---------------|-------------|-----------------|----------------|
| PDT000812919.1 | SAMN10038767  | SAMN10038767  | SRR7839992  | GCA 015566975.1 | PDS000069932.1 |
| PDT000812956.1 | SAMN10038823  | SAMN10038823  | SRR7840102  | GCA 015566395.1 | PDS000069932.1 |
| PDT000812962.1 | SAMN10038795  | SAMN10038795  | SRR7840125  | GCA 015566255.1 | PDS000069932.1 |
| PDT000812966.1 | SAMN10038791  | SAMN10038791  | SRR7840129  | GCA 015566235.1 | PDS000069932.1 |
| PDT000343228.2 | SAMEA1531745  | SAMEA1531745  | ERR177220   | GCA 900484305.1 | PDS000069441.1 |
| PDT000772717.2 | SAMEA4008455  | SAMEA4008455  | ERR1723835  | GCA 903798625.1 | PDS000069441.1 |
| PDT000772747.2 | SAMEA4008485  | SAMEA4008485  | ERR1723865  | GCA 903798915.1 | PDS000069441.1 |
| PDT000772748.2 | SAMEA4008486  | SAMEA4008486  | ERR1723866  | GCA 903798925.1 | PDS000069441.1 |
| PDT000772750.2 | SAMEA4008488  | SAMEA4008488  | ERR1723868  | GCA 903798945.1 | PDS000069441.1 |
| PDT000772753.2 | SAMEA4008491  | SAMEA4008491  | ERR1723871  | GCA 903798965.1 | PDS000069441.1 |
| PDT000772771.2 | SAMEA4008511  | SAMEA4008511  | ERR1723890  | GCA 903799165.1 | PDS000069441.1 |
| PDT000772797.2 | SAMEA4008539  | SAMEA4008539  | ERR1723916  | GCA 903799435.1 | PDS000069441.1 |
| PDT000772823.2 | SAMEA4008565  | SAMEA4008565  | ERR1723942  | GCA 903799685.1 | PDS000069441.1 |
| PDT000772849.2 | SAMEA4008591  | SAMEA4008591  | ERR1723968  | GCA 903799945.1 | PDS000069441.1 |
| PDT000066804.3 | SAMN03255448  | SAMN03255448  | SRR1955595  | GCA 001019305.2 | PDS000067765.2 |
| PDT000791273.2 | SAMEA70250668 | SAMEA70250668 | ERR2525280  | GCA 903810155.1 | PDS000069313.1 |
| PDT000790281.2 | SAMEA4008734  | SAMEA4008734  | ERR1715436  | GCA 903803165.1 | PDS000069361.1 |
| PDT000790303.2 | SAMEA4008757  | SAMEA4008757  | ERR1715458  | GCA 903803365.1 | PDS000069361.1 |
| PDT000790308.2 | SAMEA4008762  | SAMEA4008762  | ERR1715463  | GCA 903803415.1 | PDS000069361.1 |
| PDT000790315.2 | SAMEA4008771  | SAMEA4008771  | ERR1715471  | GCA 903803485.1 | PDS000069361.1 |
| PDT000790316.2 | SAMEA4008772  | SAMEA4008772  | ERR1715472  | GCA 903803495.1 | PDS000069361.1 |
| PDT000790353.2 | SAMEA4008810  | SAMEA4008810  | ERR1715509  | GCA 903803865.1 | PDS000069361.1 |
| PDT000790839.2 | SAMEA4553170  | SAMEA4553170  | ERR1891898  | GCA 903806185.1 | PDS000069361.1 |
| PDT000790893.2 | SAMEA4553184  | SAMEA4553184  | ERR1891912  | GCA 903806335.1 | PDS000069361.1 |
| PDT000790901.2 | SAMEA4553189  | SAMEA4553189  | ERR1891917  | GCA 903806385.1 | PDS000069361.1 |
| PDT000790917.2 | SAMEA4553206  | SAMEA4553206  | ERR1891934  | GCA 903806555.1 | PDS000069361.1 |
| PDT000670140.2 | SAMEA1029528  | SAMEA1029528  | ERR064944   | GCA 902715285.1 | PDS000069807.1 |
| PDT000670292.2 | SAMEA1972358  | SAMEA1972358  | ERR485414   | GCA 902716865.1 | PDS000069807.1 |
| PDT000670307.2 | SAMEA2081059  | SAMEA2081059  | ERR485421   | GCA 902716895.1 | PDS000069807.1 |
| PDT000670309.2 | SAMEA2079281  | SAMEA2079281  | ERR485426   | GCA 902716915.1 | PDS000069807.1 |
| PDT000670310.2 | SAMEA2081060  | SAMEA2081060  | ERR357915   | GCA 902717005.1 | PDS000069807.1 |
| PDT000025954.4 | SAMN02700075  | SAMN02700075  | SRR1206476  | GCA 000626615.3 | PDS000068733.1 |
| PDT000090406.2 | SAMEA1569605  | SAMEA1569605  | ERR212201   | GCA 001351215.1 | PDS000068733.1 |
| PDT000090407.2 | SAMEA1569607  | SAMEA1569607  | ERR212206   | GCA 001351235.1 | PDS000068733.1 |
| PDT000090411.2 | SAMEA1569618  | SAMEA1569618  | ERR212207   | GCA 001351315.1 | PDS000068733.1 |
| PDT000822030.1 | SAMN07674892  | SAMN07674892  | SRR6053622  | GCA 015545025.1 | PDS000070389.1 |
| PDT000822034.1 | SAMN07674888  | SAMN07674888  | SRR6053626  | GCA 015545855.1 | PDS000070389.1 |
| PDT000822098.1 | SAMN07674877  | SAMN07674877  | SRR6053690  | GCA 015544355.1 | PDS000070389.1 |
| PDT000822099.1 | SAMN07674878  | SAMN07674878  | SRR6053691  | GCA 015544335.1 | PDS000070389.1 |
| PDT000822104.1 | SAMN07674883  | SAMN07674883  | SRR6053696  | GCA 015544235.1 | PDS000070389.1 |
| PDT000670120.2 | SAMEA1029512  | SAMEA1029512  | ERR064941   | GCA 902715105.1 | PDS000069805.1 |
| PDT000670334.2 | SAMEA2079508  | SAMEA2079508  | ERR353057   | GCA 902717255.1 | PDS000069805.1 |
| PDT000670339.2 | SAMEA2079514  | SAMEA2079514  | ERR485192   | GCA 902717245.1 | PDS000069805.1 |
| PDT000670343.2 | SAMEA2081209  | SAMEA2081209  | ERR485176   | GCA 902717285.1 | PDS000069805.1 |
| PDT000670348.2 | SAMEA2081211  | SAMEA2081211  | ERR485182   | GCA 902717385.1 | PDS000069805.1 |
| PDT000080262.2 | SAMEA1030234  | SAMEA1030234  | ERR045073   | GCA 001230385.1 | PDS000069209.1 |
| PDT000080296.2 | SAMEA1030317  | SAMEA1030317  | ERR045067   | GCA 001231805.1 | PDS000069209.1 |
| PDT000080426.2 | SAMEA1030202  | SAMEA1030202  | ERR045069   | GCA 001236565.1 | PDS000069209.1 |
| PDT000118296.2 | SAMEA1464633  | SAMEA1464633  | ERR124483   | GCA 900061735.1 | PDS000069209.1 |
| PDT000811457.1 | SAMEA4387117  | SAMEA4387117  | ERR1789027  | GCA 015580655.1 | PDS000069209.1 |
| PDT000066817.3 | SAMN03255485  | SAMN03255485  | SRR1955921  | GCA 001019565.2 | PDS000068919.1 |
| PDT000075129.2 | SAMEA1569594  | SAMEA1569594  | ERR212217   | GCA 001141805.1 | PDS000068919.1 |
| PDT000090396.2 | SAMEA1569579  | SAMEA1569579  | ERR212218   | GCA 001351015.1 | PDS000068919.1 |
| PDT000090405.2 | SAMEA1569601  | SAMEA1569601  | ERR212215   | GCA 001351195.1 | PDS000068919.1 |
| PDT000090419.2 | SAMEA1569639  | SAMEA1569639  | ERR212223   | GCA 001351475.1 | PDS000068919.1 |
| PDT000080419.2 | SAMEA1030176  | SAMEA1030176  | ERR044576   | GCA 001236285.1 | PDS000069436.1 |
| PDT000772775.2 | SAMEA4008516  | SAMEA4008516  | ERR1723894  | GCA 903799205.1 | PDS000069436.1 |
| PDT000772783.2 | SAMEA4008525  | SAMEA4008525  | ERR1723902  | GCA 903799285.1 | PDS000069436.1 |
| PDT000772809.2 | SAMEA4008551  | SAMEA4008551  | ERR1723928  | GCA 903799535.1 | PDS000069436.1 |
| PDT000772858.2 | SAMEA4008601  | SAMEA4008601  | ERR1723978  | GCA 903800045.1 | PDS000069436.1 |
| PDT000072982.2 | SAMEA1569610  | SAMEA1569610  | ERR212242   | GCA 001086885.1 | PDS000069585.1 |
| PDT000073180.2 | SAMEA1569574  | SAMEA1569574  | ERR212231   | GCA 001091885.1 | PDS000069585.1 |
| PDT000075394.2 | SAMEA1569620  | SAMEA1569620  | ERR212237   | GCA 001148525.1 | PDS000069585.1 |
| PDT000075457.2 | SAMEA1569611  | SAMEA1569611  | ERR212236   | GCA 001150145.1 | PDS000069585.1 |
| PDT000075503.2 | SAMEA1569580  | SAMEA1569580  | ERR212232   | GCA 001151145.1 | PDS000069585.1 |
| PDT000066815.3 | SAMN03255474  | SAMN03255474  | SRR1955856  | GCA 001019485.2 | PDS000068906.1 |
| PDT000790224.2 | SAMEA4008680  | SAMEA4008680  | ERR1715382  | GCA 903800865.1 | PDS000068906.1 |
| PDT000711838.2 | SAMN10875742  | SAMN10875742  | SRR11015930 | GCA 011319535.1 | PDS000069646.3 |



|                |               |               |             |                 |                |
|----------------|---------------|---------------|-------------|-----------------|----------------|
| PDT000722921.2 | SAMN10689383  | SAMN10689383  | SRR11016771 | GCA 012274765.1 | PDS000069646.3 |
| PDT000904233.1 | SAMN10689407  | SAMN10689407  | SRR8389074  | GCA 015713815.1 | PDS000069646.3 |
| PDT000904234.1 | SAMN10689406  | SAMN10689406  | SRR8389077  | GCA 015713845.1 | PDS000069646.3 |
| PDT000904235.1 | SAMN10689404  | SAMN10689404  | SRR11016774 | GCA 015713855.1 | PDS000069646.3 |
| PDT000079304.2 | SAMEA1324669  | SAMEA1324669  | ERR134747   | GCA 001201715.1 | PDS000069260.1 |
| PDT000090442.2 | SAMEA1324560  | SAMEA1324560  | ERR134713   | GCA 001351935.1 | PDS000069260.1 |
| PDT000090568.2 | SAMEA1710107  | SAMEA1710107  | ERR249321   | GCA 001354455.1 | PDS000069260.1 |
| PDT000090569.2 | SAMEA1710108  | SAMEA1710108  | ERR249319   | GCA 001354475.1 | PDS000069260.1 |
| PDT000090570.2 | SAMEA1710109  | SAMEA1710109  | ERR249320   | GCA 001354495.1 | PDS000069260.1 |
| PDT000669989.2 | SAMEA958841   | SAMEA958841   | ERR033077   | GCA 902713775.1 | PDS000069799.1 |
| PDT000681573.2 | SAMEA2081683  | SAMEA2081683  | ERR353174   | GCA 902720385.1 | PDS000069799.1 |
| PDT000681574.2 | SAMEA2077582  | SAMEA2077582  | ERR485581   | GCA 902720325.1 | PDS000069799.1 |
| PDT000681576.2 | SAMEA2077583  | SAMEA2077583  | ERR485582   | GCA 902720345.1 | PDS000069799.1 |
| PDT000681577.2 | SAMEA2077581  | SAMEA2077581  | ERR353170   | GCA 902720425.1 | PDS000069799.1 |
| PDT000070452.2 | SAMN03196998  | SAMN03196998  | SRR1655230  | GCA 001060095.1 | PDS000069617.1 |
| PDT000070458.2 | SAMN03197034  | SAMN03197034  | SRR1655266  | GCA 001060225.1 | PDS000069617.1 |
| PDT000070490.2 | SAMN03197038  | SAMN03197038  | SRR1655270  | GCA 001060905.1 | PDS000069617.1 |
| PDT000070491.2 | SAMN03197037  | SAMN03197037  | SRR1655269  | GCA 001060915.1 | PDS000069617.1 |
| PDT000070493.2 | SAMN03197040  | SAMN03197040  | SRR1655272  | GCA 001060975.1 | PDS000069617.1 |
| PDT000080100.2 | SAMEA734703   | SAMEA734703   | ERR017272   | GCA 001224825.1 | PDS000069213.1 |
| PDT000080221.2 | SAMEA734722   | SAMEA734722   | ERR017292   | GCA 001229005.1 | PDS000069213.1 |
| PDT000080294.2 | SAMEA734720   | SAMEA734720   | ERR017290   | GCA 001231565.1 | PDS000069213.1 |
| PDT000080315.2 | SAMEA734696   | SAMEA734696   | ERR017267   | GCA 001232445.1 | PDS000069213.1 |
| PDT000080511.2 | SAMEA734700   | SAMEA734700   | ERR017269   | GCA 001239525.1 | PDS000069213.1 |
| PDT000772863.2 | SAMEA4008606  | SAMEA4008606  | ERR1723983  | GCA 903800085.1 | PDS000069428.1 |
| PDT000772864.2 | SAMEA4008608  | SAMEA4008608  | ERR1723984  | GCA 903800105.1 | PDS000069428.1 |
| PDT000772865.2 | SAMEA4008609  | SAMEA4008609  | ERR1723985  | GCA 903800125.1 | PDS000069428.1 |
| PDT000772873.2 | SAMEA4008619  | SAMEA4008619  | ERR1723994  | GCA 903800195.1 | PDS000069428.1 |
| PDT000782260.2 | SAMEA4008625  | SAMEA4008625  | ERR1724000  | GCA 903800275.1 | PDS000069428.1 |
| PDT000178167.2 | SAMN03893338  | SAMN03893338  | SRR5909218  | GCA 001936695.1 | PDS000068508.1 |
| PDT000108722.1 | SAMN03359451  | SAMN03359451  | SRR1814638  | GCA 015616665.1 | PDS000068763.1 |
| PDT000108773.1 | SAMN03359502  | SAMN03359502  | SRR1814689  | GCA 015613865.1 | PDS000068763.1 |
| PDT000079053.2 | SAMEA1710115  | SAMEA1710115  | ERR256881   | GCA 001196435.1 | PDS000068604.1 |
| PDT000079088.2 | SAMEA1324513  | SAMEA1324513  | ERR134865   | GCA 001197175.1 | PDS000068604.1 |
| PDT000079767.2 | SAMEA1466478  | SAMEA1466478  | ERR302744   | GCA 001211485.1 | PDS000068604.1 |
| PDT000090509.2 | SAMEA1324754  | SAMEA1324754  | ERR134863   | GCA 001353275.1 | PDS000068604.1 |
| PDT000090561.2 | SAMEA1710077  | SAMEA1710077  | ERR256880   | GCA 001354315.1 | PDS000068604.1 |
| PDT000466728.2 | SAMN10838470  | SAMN10838470  | SRR8501280  | GCA 004167915.1 | PDS000068567.1 |
| PDT000466743.2 | SAMN10838472  | SAMN10838472  | SRR8501290  | GCA 004168175.1 | PDS000068567.1 |
| PDT000476156.2 | SAMN10838473  | SAMN10838473  | SRR8501291  | GCA 004328315.1 | PDS000068567.1 |
| PDT000108668.1 | SAMN03359396  | SAMN03359396  | SRR1814583  | GCA 015618185.1 | PDS000068993.1 |
| PDT000766292.2 | SAMN14906897  | SAMN14906897  | SRR11787423 | GCA 013338425.1 | PDS000068973.1 |
| PDT000813643.1 | SAMN12776191  | SAMN12776191  | SRR10179072 | GCA 009457225.1 | PDS000068973.1 |
| PDT000766291.2 | SAMN14906898  | SAMN14906898  | SRR11787422 | GCA 013338405.1 | PDS000068986.1 |
| PDT000813642.1 | SAMN12776192  | SAMN12776192  | SRR10179070 | GCA 009457185.1 | PDS000068986.1 |
| PDT000090340.2 | SAMEA1463406  | SAMEA1463406  | ERR302729   | GCA 001349435.1 | PDS000068971.1 |
| PDT000090348.2 | SAMEA1463448  | SAMEA1463448  | ERR144819   | GCA 001349595.1 | PDS000068971.1 |
| PDT000090343.2 | SAMEA1463420  | SAMEA1463420  | ERR144816   | GCA 001349495.1 | PDS000068983.1 |
| PDT000090354.2 | SAMEA1463465  | SAMEA1463465  | ERR144815   | GCA 001349715.1 | PDS000068983.1 |
| PDT000686754.2 | SAMN12251161  | SAMN12251161  | SRR10905596 | GCA 010599565.1 | PDS000069145.1 |
| PDT000170563.2 | SAMEA3449051  | SAMEA3449051  | ERR1069904  | GCA 900125305.1 | PDS000069147.1 |
| PDT000171195.2 | SAMEA3449105  | SAMEA3449105  | ERR1070105  | GCA 900128295.1 | PDS000069147.1 |
| PDT000791239.2 | SAMEA70225168 | SAMEA70225168 | ERR2525253  | GCA 903809885.1 | PDS000069316.1 |
| PDT000791246.2 | SAMEA70230418 | SAMEA70230418 | ERR2525257  | GCA 903809915.1 | PDS000069315.1 |
| PDT000791251.2 | SAMEA70234168 | SAMEA70234168 | ERR2525260  | GCA 903809955.1 | PDS000069315.1 |
| PDT000791124.2 | SAMEA70127668 | SAMEA70127668 | ERR2506422  | GCA 903808665.1 | PDS000069322.1 |
| PDT000791174.2 | SAMEA70165168 | SAMEA70165168 | ERR2506465  | GCA 903809095.1 | PDS000069322.1 |
| PDT000791117.2 | SAMEA70122418 | SAMEA70122418 | ERR2506415  | GCA 903808595.1 | PDS000069324.1 |
| PDT000791121.2 | SAMEA70125418 | SAMEA70125418 | ERR2506419  | GCA 903808635.1 | PDS000069324.1 |
| PDT000132881.2 | SAMEA2236480  | SAMEA2236480  | ERR422933   | GCA 900080745.1 | PDS000069312.1 |
| PDT000132945.2 | SAMEA2236440  | SAMEA2236440  | ERR422986   | GCA 900080375.1 | PDS000069312.1 |
| PDT000791133.2 | SAMEA70134418 | SAMEA70134418 | ERR2506431  | GCA 903808755.1 | PDS000069320.1 |
| PDT000791137.2 | SAMEA70137418 | SAMEA70137418 | ERR2506435  | GCA 903808795.1 | PDS000069320.1 |
| PDT000791267.2 | SAMEA70246168 | SAMEA70246168 | ERR2525274  | GCA 903810095.1 | PDS000069311.1 |
| PDT000791276.2 | SAMEA70252918 | SAMEA70252918 | ERR2525283  | GCA 903810185.1 | PDS000069311.1 |
| PDT000132944.2 | SAMEA2384360  | SAMEA2384360  | ERR554283   | GCA 900081605.1 | PDS000069323.1 |
| PDT000166649.2 | SAMEA2445590  | SAMEA2445590  | ERR573293   | GCA 900083485.1 | PDS000069323.1 |
| PDT000108615.1 | SAMN03359343  | SAMN03359343  | SRR1814530  | GCA 015617165.1 | PDS000069480.1 |

|                |                |                |             |                 |                |
|----------------|----------------|----------------|-------------|-----------------|----------------|
| PDT000772449.2 | SAMEA103891323 | SAMEA103891323 | ERR2533555  | GCA 903812725.1 | PDS000069472.1 |
| PDT000772471.2 | SAMEA103891345 | SAMEA103891345 | ERR2533576  | GCA 903812935.1 | PDS000069472.1 |
| PDT000772397.2 | SAMEA103891270 | SAMEA103891270 | ERR2533501  | GCA 903811975.1 | PDS000069476.1 |
| PDT000772436.2 | SAMEA103891310 | SAMEA103891310 | ERR2533541  | GCA 903812475.1 | PDS000069476.1 |
| PDT000772423.2 | SAMEA103891297 | SAMEA103891297 | ERR2533528  | GCA 903812245.1 | PDS000069477.1 |
| PDT000772428.2 | SAMEA103891302 | SAMEA103891302 | ERR2533533  | GCA 903812325.1 | PDS000069477.1 |
| PDT000772441.2 | SAMEA103891315 | SAMEA103891315 | ERR2533546  | GCA 903812575.1 | PDS000069470.1 |
| PDT000772457.2 | SAMEA103891331 | SAMEA103891331 | ERR2533562  | GCA 903812795.1 | PDS000069470.1 |
| PDT000772438.2 | SAMEA103891312 | SAMEA103891312 | ERR2533543  | GCA 903812515.1 | PDS000069475.1 |
| PDT000772443.2 | SAMEA103891317 | SAMEA103891317 | ERR2533548  | GCA 903812615.1 | PDS000069475.1 |
| PDT000772445.2 | SAMEA103891319 | SAMEA103891319 | ERR2533550  | GCA 903812645.1 | PDS000069474.1 |
| PDT000772456.2 | SAMEA103891330 | SAMEA103891330 | ERR2533561  | GCA 903812785.1 | PDS000069474.1 |
| PDT000772450.2 | SAMEA103891324 | SAMEA103891324 | ERR2533556  | GCA 903812735.1 | PDS000069471.1 |
| PDT000772786.2 | SAMEA4008528   | SAMEA4008528   | ERR1723905  | GCA 903799325.1 | PDS000069471.1 |
| PDT000772422.2 | SAMEA103891296 | SAMEA103891296 | ERR2533527  | GCA 903812235.1 | PDS000069478.1 |
| PDT000772429.2 | SAMEA103891303 | SAMEA103891303 | ERR2533534  | GCA 903812355.1 | PDS000069478.1 |
| PDT000766267.2 | SAMN14906921   | SAMN14906921   | SRR11787443 | GCA 013337925.1 | PDS000069561.1 |
| PDT000813766.1 | SAMN12776067   | SAMN12776067   | SRR10179167 | GCA 009459705.1 | PDS000069561.1 |
| PDT000766270.2 | SAMN14906917   | SAMN14906917   | SRR11787447 | GCA 013337985.1 | PDS000069559.1 |
| PDT000813668.1 | SAMN12776165   | SAMN12776165   | SRR10179274 | GCA 009457725.1 | PDS000069559.1 |
| PDT000766260.2 | SAMN14906928   | SAMN14906928   | SRR11787435 | GCA 013337785.1 | PDS000069563.1 |
| PDT000813598.1 | SAMN12776235   | SAMN12776235   | SRR10179023 | GCA 009456325.1 | PDS000069563.1 |
| PDT000766271.2 | SAMN14906914   | SAMN14906914   | SRR11787388 | GCA 013338005.1 | PDS000069558.1 |
| PDT000813612.1 | SAMN12776221   | SAMN12776221   | SRR10179039 | GCA 009456615.1 | PDS000069558.1 |
| PDT000766269.2 | SAMN14906920   | SAMN14906920   | SRR11787444 | GCA 013337965.1 | PDS000069560.1 |
| PDT000813772.1 | SAMN12776061   | SAMN12776061   | SRR10179174 | GCA 009459815.1 | PDS000069560.1 |
| PDT000766265.2 | SAMN14906924   | SAMN14906924   | SRR11787439 | GCA 013337885.1 | PDS000069562.1 |
| PDT000813603.1 | SAMN12776231   | SAMN12776231   | SRR10179028 | GCA 009456445.1 | PDS000069562.1 |
| PDT000116540.2 | SAMEA1464525   | SAMEA1464525   | ERR118430   | GCA 900044555.1 | PDS000069712.1 |
| PDT000119433.2 | SAMEA1464194   | SAMEA1464194   | ERR118403   | GCA 900039815.1 | PDS000069712.1 |
| PDT000812944.1 | SAMN10038938   | SAMN10038938   | SRR7840086  | GCA 015566655.1 | PDS000069914.1 |
| PDT000812951.1 | SAMN10038947   | SAMN10038947   | SRR7840094  | GCA 015566515.1 | PDS000069914.1 |
| PDT000812738.1 | SAMN10038994   | SAMN10038994   | SRR7839450  | GCA 015570995.1 | PDS000069907.1 |
| PDT000812739.1 | SAMN10038993   | SAMN10038993   | SRR7839451  | GCA 015570955.1 | PDS000069907.1 |
| PDT000812896.1 | SAMN10038961   | SAMN10038961   | SRR7839947  | GCA 015567875.1 | PDS000069913.1 |
| PDT000812897.1 | SAMN10038962   | SAMN10038962   | SRR7839948  | GCA 015567855.1 | PDS000069913.1 |
| PDT000812923.1 | SAMN10038982   | SAMN10038982   | SRR7840004  | GCA 015567255.1 | PDS000069908.1 |
| PDT000812926.1 | SAMN10038981   | SAMN10038981   | SRR7840007  | GCA 015567175.1 | PDS000069908.1 |
| PDT000118700.2 | SAMEA1464203   | SAMEA1464203   | ERR118452   | GCA 900039185.1 | PDS000069900.1 |
| PDT000343137.2 | SAMEA1469910   | SAMEA1469910   | ERR158981   | GCA 900483015.1 | PDS000069900.1 |
| PDT000118713.2 | SAMEA1464521   | SAMEA1464521   | ERR124473   | GCA 900063945.1 | PDS000069889.1 |
| PDT000119093.2 | SAMEA1317455   | SAMEA1317455   | ERR111125   | GCA 900042535.1 | PDS000069889.1 |
| PDT000117783.2 | SAMEA1317398   | SAMEA1317398   | ERR107820   | GCA 900043895.1 | PDS000069912.1 |
| PDT000118662.2 | SAMEA1317412   | SAMEA1317412   | ERR107819   | GCA 900019055.1 | PDS000069912.1 |
| PDT000132668.2 | SAMEA2384368   | SAMEA2384368   | ERR554291   | GCA 900081625.1 | PDS000069911.1 |
| PDT000166656.2 | SAMEA2445598   | SAMEA2445598   | ERR573301   | GCA 900083245.1 | PDS000069911.1 |
| PDT000050087.2 | SAMN03219991   | SAMN03219991   | SRR1790316  | GCA 000877865.1 | N/A            |
| PDT000050088.2 | SAMN03219989   | SAMN03219989   | SRR1790315  | GCA 000877925.1 | N/A            |
| PDT000050089.2 | SAMN03219993   | SAMN03219993   | SRR1790318  | GCA 000877955.1 | N/A            |
| PDT000050090.2 | SAMN03202661   | SAMN03202661   | SRR1786284  | GCA 000878015.1 | N/A            |
| PDT000050091.2 | SAMN03219992   | SAMN03219992   | SRR1790317  | GCA 000878105.1 | N/A            |
| PDT000050124.2 | SAMN03202272   | SAMN03202272   | SRR1786145  | GCA 000877855.1 | N/A            |
| PDT000050127.2 | SAMN03202224   | SAMN03202224   | SRR1786280  | GCA 000877985.1 | N/A            |
| PDT000050128.2 | SAMN03219984   | SAMN03219984   | SRR1786285  | GCA 000878025.1 | N/A            |
| PDT000050129.2 | SAMN03219986   | SAMN03219986   | SRR1786287  | GCA 000878035.1 | N/A            |
| PDT000050131.2 | SAMN03219987   | SAMN03219987   | SRR1790308  | GCA 000878055.1 | N/A            |
| PDT000050132.2 | SAMN03219988   | SAMN03219988   | SRR1790310  | GCA 000878095.1 | N/A            |
| PDT000062471.2 | SAMN03481073   | SAMN03481073   | SRR1980941  | GCA 000981055.1 | N/A            |
| PDT000066772.3 | SAMN03255443   | SAMN03255443   | SRR1955500  | GCA 001018635.2 | N/A            |
| PDT000066774.3 | SAMN03255444   | SAMN03255444   | SRR1955581  | GCA 001018685.2 | N/A            |
| PDT000066781.3 | SAMN03255460   | SAMN03255460   | SRR1955629  | GCA 001018845.2 | N/A            |
| PDT000066793.3 | SAMN03255475   | SAMN03255475   | SRR1955859  | GCA 001019045.2 | N/A            |
| PDT000066799.3 | SAMN03255488   | SAMN03255488   | SRR1955927  | GCA 001019195.2 | N/A            |
| PDT000066801.3 | SAMN03255489   | SAMN03255489   | SRR1955929  | GCA 001019215.2 | N/A            |
| PDT000066808.3 | SAMN03255456   | SAMN03255456   | SRR1955619  | GCA 001019375.2 | N/A            |
| PDT000066809.3 | SAMN03255459   | SAMN03255459   | SRR1955626  | GCA 001019395.2 | N/A            |
| PDT000067665.2 | SAMN03699895   | SAMN03699895   | SRR2037312  | GCA 001027045.1 | N/A            |
| PDT000069546.2 | SAMEA862547    | SAMEA862547    | ERR024990   | GCA 001047755.1 | N/A            |

|                |              |              |            |                 |     |
|----------------|--------------|--------------|------------|-----------------|-----|
| PDT000069572.2 | SAMEA3360369 | SAMEA3360369 | ERR868116  | GCA 001049575.1 | N/A |
| PDT000069573.2 | SAMEA3360370 | SAMEA3360370 | ERR868117  | GCA 001049595.1 | N/A |
| PDT000069574.2 | SAMEA3360371 | SAMEA3360371 | ERR868118  | GCA 001049615.1 | N/A |
| PDT000070454.2 | SAMN03196994 | SAMN03196994 | SRR1655226 | GCA 001060125.1 | N/A |
| PDT000070484.2 | SAMN03197254 | SAMN03197254 | SRR1655486 | GCA 001060795.1 | N/A |
| PDT000070511.2 | SAMN03197234 | SAMN03197234 | SRR1655466 | GCA 001061385.1 | N/A |
| PDT000070517.2 | SAMN03197292 | SAMN03197292 | SRR1655524 | GCA 001061525.1 | N/A |
| PDT000070518.2 | SAMN03197301 | SAMN03197301 | SRR1655533 | GCA 001061555.1 | N/A |
| PDT000070525.2 | SAMN03197336 | SAMN03197336 | SRR1655568 | GCA 001061695.1 | N/A |
| PDT000070528.2 | SAMN03196978 | SAMN03196978 | SRR1655210 | GCA 001061735.1 | N/A |
| PDT000070539.2 | SAMN03197080 | SAMN03197080 | SRR1655312 | GCA 001061995.1 | N/A |
| PDT000070564.2 | SAMN03197263 | SAMN03197263 | SRR1655495 | GCA 001062615.1 | N/A |
| PDT000070569.2 | SAMN03197296 | SAMN03197296 | SRR1655528 | GCA 001062705.1 | N/A |
| PDT000070570.2 | SAMN03197302 | SAMN03197302 | SRR1655534 | GCA 001062735.1 | N/A |
| PDT000070619.2 | SAMN03197364 | SAMN03197364 | SRR1655596 | GCA 001063895.1 | N/A |
| PDT000070622.2 | SAMN03197360 | SAMN03197360 | SRR1655592 | GCA 001063885.1 | N/A |
| PDT000070628.2 | SAMN03197419 | SAMN03197419 | SRR1655651 | GCA 001064055.1 | N/A |
| PDT000070632.2 | SAMN03197442 | SAMN03197442 | SRR1655674 | GCA 001064135.1 | N/A |
| PDT000070634.2 | SAMN03197447 | SAMN03197447 | SRR1655679 | GCA 001064175.1 | N/A |
| PDT000070637.2 | SAMN03197462 | SAMN03197462 | SRR1655694 | GCA 001064255.1 | N/A |
| PDT000070652.2 | SAMN03197516 | SAMN03197516 | SRR1655748 | GCA 001064555.1 | N/A |
| PDT000070662.2 | SAMN03197585 | SAMN03197585 | SRR1655817 | GCA 001064795.1 | N/A |
| PDT000070680.2 | SAMN03197677 | SAMN03197677 | SRR1655909 | GCA 001065195.1 | N/A |
| PDT000070686.2 | SAMN03197713 | SAMN03197713 | SRR1655945 | GCA 001065315.1 | N/A |
| PDT000070691.2 | SAMN03197761 | SAMN03197761 | SRR1655993 | GCA 001065435.1 | N/A |
| PDT000070692.2 | SAMN03197773 | SAMN03197773 | SRR1656005 | GCA 001065445.1 | N/A |
| PDT000070694.2 | SAMN03197776 | SAMN03197776 | SRR1656008 | GCA 001065475.1 | N/A |
| PDT000070698.2 | SAMN03197787 | SAMN03197787 | SRR1656019 | GCA 001065555.1 | N/A |
| PDT000070700.2 | SAMN03197803 | SAMN03197803 | SRR1656035 | GCA 001065595.1 | N/A |
| PDT000070712.2 | SAMN03197876 | SAMN03197876 | SRR1656108 | GCA 001065895.1 | N/A |
| PDT000070737.2 | SAMN03198029 | SAMN03198029 | SRR1656261 | GCA 001066425.1 | N/A |
| PDT000070770.2 | SAMN03197924 | SAMN03197924 | SRR1656156 | GCA 001067075.1 | N/A |
| PDT000070776.2 | SAMN03197964 | SAMN03197964 | SRR1656196 | GCA 001067185.1 | N/A |
| PDT000070786.2 | SAMN03198023 | SAMN03198023 | SRR1656255 | GCA 001067415.1 | N/A |
| PDT000070799.2 | SAMN03198194 | SAMN03198194 | SRR1656426 | GCA 001067735.1 | N/A |
| PDT000070817.2 | SAMN03198156 | SAMN03198156 | SRR1656388 | GCA 001068155.1 | N/A |
| PDT000070825.2 | SAMN03198195 | SAMN03198195 | SRR1656427 | GCA 001068315.1 | N/A |
| PDT000071201.2 | SAMN03197299 | SAMN03197299 | SRR1655531 | GCA 001076165.1 | N/A |
| PDT000071215.2 | SAMN03197670 | SAMN03197670 | SRR1655902 | GCA 001076515.1 | N/A |
| PDT000076844.4 | SAMN03787328 | SAMN03787328 | SRR6484434 | GCA 001183705.3 | N/A |
| PDT000078825.2 | SAMEA1324745 | SAMEA1324745 | ERR134826  | GCA 001191695.1 | N/A |
| PDT000078842.2 | SAMEA1324606 | SAMEA1324606 | ERR134677  | GCA 001192035.1 | N/A |
| PDT000078844.2 | SAMEA1463397 | SAMEA1463397 | ERR302733  | GCA 001192075.1 | N/A |
| PDT000078847.2 | SAMEA1463413 | SAMEA1463413 | ERR144833  | GCA 001192175.1 | N/A |
| PDT000078863.2 | SAMEA1466467 | SAMEA1466467 | ERR137963  | GCA 001192495.1 | N/A |
| PDT000078882.2 | SAMEA1708990 | SAMEA1708990 | ERR234801  | GCA 001192895.1 | N/A |
| PDT000078922.2 | SAMEA1324636 | SAMEA1324636 | ERR134797  | GCA 001193715.1 | N/A |
| PDT000078935.2 | SAMEA1463311 | SAMEA1463311 | ERR302685  | GCA 001193975.1 | N/A |
| PDT000078964.2 | SAMEA1324721 | SAMEA1324721 | ERR134827  | GCA 001194585.1 | N/A |
| PDT000079030.2 | SAMEA1324650 | SAMEA1324650 | ERR134760  | GCA 001195945.1 | N/A |
| PDT000079046.2 | SAMEA1324665 | SAMEA1324665 | ERR134819  | GCA 001196275.1 | N/A |
| PDT000079062.2 | SAMEA1463332 | SAMEA1463332 | ERR144792  | GCA 001196615.1 | N/A |
| PDT000079071.2 | SAMEA1463440 | SAMEA1463440 | ERR302704  | GCA 001196795.1 | N/A |
| PDT000079103.2 | SAMEA1708834 | SAMEA1708834 | ERR237626  | GCA 001197515.1 | N/A |
| PDT000079113.2 | SAMEA1463428 | SAMEA1463428 | ERR144817  | GCA 001197715.1 | N/A |
| PDT000079144.2 | SAMEA1324674 | SAMEA1324674 | ERR134771  | GCA 001198335.1 | N/A |
| PDT000079185.2 | SAMEA1324635 | SAMEA1324635 | ERR134852  | GCA 001199235.1 | N/A |
| PDT000079216.2 | SAMEA1033422 | SAMEA1033422 | ERR084604  | GCA 001199875.1 | N/A |
| PDT000079246.2 | SAMEA1324602 | SAMEA1324602 | ERR134751  | GCA 001200515.1 | N/A |
| PDT000079250.2 | SAMEA1324757 | SAMEA1324757 | ERR134745  | GCA 001200595.1 | N/A |
| PDT000079271.2 | SAMEA1708805 | SAMEA1708805 | ERR234807  | GCA 001201035.1 | N/A |
| PDT000079296.2 | SAMEA1710085 | SAMEA1710085 | ERR249318  | GCA 001201535.1 | N/A |
| PDT000079308.2 | SAMEA1708843 | SAMEA1708843 | ERR234809  | GCA 001201795.1 | N/A |
| PDT000079373.2 | SAMEA1466540 | SAMEA1466540 | ERR302766  | GCA 001203175.1 | N/A |
| PDT000079397.2 | SAMEA1324571 | SAMEA1324571 | ERR134789  | GCA 001203675.1 | N/A |
| PDT000079417.2 | SAMEA1324690 | SAMEA1324690 | ERR134830  | GCA 001204095.1 | N/A |
| PDT000079426.2 | SAMEA1324663 | SAMEA1324663 | ERR134633  | GCA 001204295.1 | N/A |
| PDT000079453.2 | SAMEA1324747 | SAMEA1324747 | ERR134689  | GCA 001204875.1 | N/A |

|                |              |              |           |                 |     |
|----------------|--------------|--------------|-----------|-----------------|-----|
| PDT000079479.2 | SAMEA1466491 | SAMEA1466491 | ERR302835 | GCA 001205395.1 | N/A |
| PDT000079521.2 | SAMEA1324648 | SAMEA1324648 | ERR134734 | GCA 001206275.1 | N/A |
| PDT000079541.2 | SAMEA1708768 | SAMEA1708768 | ERR234832 | GCA 001206695.1 | N/A |
| PDT000079618.2 | SAMEA1324649 | SAMEA1324649 | ERR134820 | GCA 001208345.1 | N/A |
| PDT000079620.2 | SAMEA1466479 | SAMEA1466479 | ERR302796 | GCA 001208385.1 | N/A |
| PDT000079623.2 | SAMEA1324720 | SAMEA1324720 | ERR134707 | GCA 001208445.1 | N/A |
| PDT000079631.2 | SAMEA1463479 | SAMEA1463479 | ERR144749 | GCA 001208645.1 | N/A |
| PDT000079665.2 | SAMEA1324697 | SAMEA1324697 | ERR134821 | GCA 001209345.1 | N/A |
| PDT000079669.2 | SAMEA1529878 | SAMEA1529878 | ERR175935 | GCA 001209425.1 | N/A |
| PDT000079676.2 | SAMEA1324619 | SAMEA1324619 | ERR134754 | GCA 001209565.1 | N/A |
| PDT000079682.2 | SAMEA1708844 | SAMEA1708844 | ERR234847 | GCA 001209685.1 | N/A |
| PDT000079684.2 | SAMEA1324659 | SAMEA1324659 | ERR134664 | GCA 001209725.1 | N/A |
| PDT000079686.2 | SAMEA1324717 | SAMEA1324717 | ERR134659 | GCA 001209765.1 | N/A |
| PDT000079687.2 | SAMEA1708872 | SAMEA1708872 | ERR234815 | GCA 001209785.1 | N/A |
| PDT000079725.2 | SAMEA1324701 | SAMEA1324701 | ERR134829 | GCA 001210565.1 | N/A |
| PDT000079728.2 | SAMEA1324564 | SAMEA1324564 | ERR134685 | GCA 001210625.1 | N/A |
| PDT000079737.2 | SAMEA1463458 | SAMEA1463458 | ERR302722 | GCA 001210805.1 | N/A |
| PDT000079739.2 | SAMEA1466462 | SAMEA1466462 | ERR302800 | GCA 001210845.1 | N/A |
| PDT000079747.2 | SAMEA1463427 | SAMEA1463427 | ERR302703 | GCA 001211025.1 | N/A |
| PDT000079748.2 | SAMEA1466471 | SAMEA1466471 | ERR137923 | GCA 001211045.1 | N/A |
| PDT000079753.2 | SAMEA1324579 | SAMEA1324579 | ERR134756 | GCA 001211185.1 | N/A |
| PDT000079813.2 | SAMEA1324711 | SAMEA1324711 | ERR134828 | GCA 001212425.1 | N/A |
| PDT000079821.2 | SAMEA1324521 | SAMEA1324521 | ERR134683 | GCA 001212585.1 | N/A |
| PDT000079831.2 | SAMEA1466477 | SAMEA1466477 | ERR137967 | GCA 001212785.1 | N/A |
| PDT000080061.2 | SAMEA862577  | SAMEA862577  | ERR026652 | GCA 001223565.1 | N/A |
| PDT000080063.2 | SAMEA734789  | SAMEA734789  | ERR017263 | GCA 001223625.1 | N/A |
| PDT000080064.2 | SAMEA734692  | SAMEA734692  | ERR017256 | GCA 001223645.1 | N/A |
| PDT000080065.2 | SAMEA734713  | SAMEA734713  | ERR017283 | GCA 001223665.1 | N/A |
| PDT000080067.2 | SAMEA734752  | SAMEA734752  | ERR017293 | GCA 001223705.1 | N/A |
| PDT000080068.2 | SAMEA1030338 | SAMEA1030338 | ERR044593 | GCA 001223785.1 | N/A |
| PDT000080070.2 | SAMEA862622  | SAMEA862622  | ERR026709 | GCA 001223825.1 | N/A |
| PDT000080074.2 | SAMEA734747  | SAMEA734747  | ERR017238 | GCA 001223965.1 | N/A |
| PDT000080076.2 | SAMEA734786  | SAMEA734786  | ERR017247 | GCA 001224045.1 | N/A |
| PDT000080078.2 | SAMEA1030156 | SAMEA1030156 | ERR045054 | GCA 001224085.1 | N/A |
| PDT000080083.2 | SAMEA734768  | SAMEA734768  | ERR017231 | GCA 001224285.1 | N/A |
| PDT000080087.2 | SAMEA1030276 | SAMEA1030276 | ERR044571 | GCA 001224445.1 | N/A |
| PDT000080088.2 | SAMEA862558  | SAMEA862558  | ERR026665 | GCA 001224505.1 | N/A |
| PDT000080089.2 | SAMEA734719  | SAMEA734719  | ERR017278 | GCA 001224525.1 | N/A |
| PDT000080091.2 | SAMEA862564  | SAMEA862564  | ERR026007 | GCA 001224565.1 | N/A |
| PDT000080092.2 | SAMEA734730  | SAMEA734730  | ERR017193 | GCA 001224605.1 | N/A |
| PDT000080095.2 | SAMEA862659  | SAMEA862659  | ERR024684 | GCA 001224705.1 | N/A |
| PDT000080096.2 | SAMEA862615  | SAMEA862615  | ERR024967 | GCA 001224725.1 | N/A |
| PDT000080098.2 | SAMEA1030332 | SAMEA1030332 | ERR045053 | GCA 001224765.1 | N/A |
| PDT000080099.2 | SAMEA862630  | SAMEA862630  | ERR024673 | GCA 001224785.1 | N/A |
| PDT000080101.2 | SAMEA862549  | SAMEA862549  | ERR024992 | GCA 001224885.1 | N/A |
| PDT000080102.2 | SAMEA734798  | SAMEA734798  | ERR017215 | GCA 001224925.1 | N/A |
| PDT000080103.2 | SAMEA734749  | SAMEA734749  | ERR017297 | GCA 001224945.1 | N/A |
| PDT000080105.2 | SAMEA862569  | SAMEA862569  | ERR026688 | GCA 001225125.1 | N/A |
| PDT000080109.2 | SAMEA862534  | SAMEA862534  | ERR024977 | GCA 001225305.1 | N/A |
| PDT000080110.2 | SAMEA862533  | SAMEA862533  | ERR024978 | GCA 001225365.1 | N/A |
| PDT000080113.2 | SAMEA734783  | SAMEA734783  | ERR017244 | GCA 001225505.1 | N/A |
| PDT000080114.2 | SAMEA734689  | SAMEA734689  | ERR017259 | GCA 001225525.1 | N/A |
| PDT000080115.2 | SAMEA734721  | SAMEA734721  | ERR017291 | GCA 001225545.1 | N/A |
| PDT000080116.2 | SAMEA734774  | SAMEA734774  | ERR017208 | GCA 001225585.1 | N/A |
| PDT000080118.2 | SAMEA1030281 | SAMEA1030281 | ERR045063 | GCA 001225625.1 | N/A |
| PDT000080121.2 | SAMEA862647  | SAMEA862647  | ERR024681 | GCA 001225725.1 | N/A |
| PDT000080123.2 | SAMEA862541  | SAMEA862541  | ERR026662 | GCA 001225825.1 | N/A |
| PDT000080131.2 | SAMEA734776  | SAMEA734776  | ERR017217 | GCA 001226165.1 | N/A |
| PDT000080134.2 | SAMEA862589  | SAMEA862589  | ERR025795 | GCA 001226265.1 | N/A |
| PDT000080136.2 | SAMEA734772  | SAMEA734772  | ERR017210 | GCA 001226305.1 | N/A |
| PDT000080138.2 | SAMEA734717  | SAMEA734717  | ERR017287 | GCA 001226365.1 | N/A |
| PDT000080140.2 | SAMEA734780  | SAMEA734780  | ERR017225 | GCA 001226445.1 | N/A |
| PDT000080142.2 | SAMEA862591  | SAMEA862591  | ERR025799 | GCA 001226505.1 | N/A |
| PDT000080143.2 | SAMEA862543  | SAMEA862543  | ERR024985 | GCA 001226525.1 | N/A |
| PDT000080144.2 | SAMEA1030213 | SAMEA1030213 | ERR045070 | GCA 001226565.1 | N/A |
| PDT000080145.2 | SAMEA734757  | SAMEA734757  | ERR017171 | GCA 001226585.1 | N/A |
| PDT000080146.2 | SAMEA734790  | SAMEA734790  | ERR017254 | GCA 001226605.1 | N/A |
| PDT000080147.2 | SAMEA862574  | SAMEA862574  | ERR026653 | GCA 001226625.1 | N/A |

|                |              |              |           |                 |     |
|----------------|--------------|--------------|-----------|-----------------|-----|
| PDT000080148.2 | SAMEA862643  | SAMEA862643  | ERR024679 | GCA 001226645.1 | N/A |
| PDT000080149.2 | SAMEA1030250 | SAMEA1030250 | ERR044568 | GCA 001226685.1 | N/A |
| PDT000080153.2 | SAMEA734708  | SAMEA734708  | ERR017281 | GCA 001226785.1 | N/A |
| PDT000080155.2 | SAMEA862602  | SAMEA862602  | ERR026010 | GCA 001226865.1 | N/A |
| PDT000080157.2 | SAMEA862586  | SAMEA862586  | ERR025804 | GCA 001226905.1 | N/A |
| PDT000080158.2 | SAMEA862658  | SAMEA862658  | ERR024683 | GCA 001226925.1 | N/A |
| PDT000080159.2 | SAMEA1030186 | SAMEA1030186 | ERR045057 | GCA 001226965.1 | N/A |
| PDT000080161.2 | SAMEA862560  | SAMEA862560  | ERR026669 | GCA 001227005.1 | N/A |
| PDT000080164.2 | SAMEA862546  | SAMEA862546  | ERR024989 | GCA 001227085.1 | N/A |
| PDT000080165.2 | SAMEA734746  | SAMEA734746  | ERR017237 | GCA 001227105.1 | N/A |
| PDT000080166.2 | SAMEA734716  | SAMEA734716  | ERR017288 | GCA 001227145.1 | N/A |
| PDT000080174.2 | SAMEA734771  | SAMEA734771  | ERR017209 | GCA 001227445.1 | N/A |
| PDT000080175.2 | SAMEA862604  | SAMEA862604  | ERR026008 | GCA 001227505.1 | N/A |
| PDT000080176.2 | SAMEA862585  | SAMEA862585  | ERR025801 | GCA 001227545.1 | N/A |
| PDT000080177.2 | SAMEA862631  | SAMEA862631  | ERR024674 | GCA 001227565.1 | N/A |
| PDT000080180.2 | SAMEA734726  | SAMEA734726  | ERR017299 | GCA 001227645.1 | N/A |
| PDT000080185.2 | SAMEA862529  | SAMEA862529  | ERR024971 | GCA 001227825.1 | N/A |
| PDT000080189.2 | SAMEA734691  | SAMEA734691  | ERR017257 | GCA 001227925.1 | N/A |
| PDT000080192.2 | SAMEA862548  | SAMEA862548  | ERR024991 | GCA 001227985.1 | N/A |
| PDT000080193.2 | SAMEA1030316 | SAMEA1030316 | ERR045052 | GCA 001228025.1 | N/A |
| PDT000080194.2 | SAMEA862552  | SAMEA862552  | ERR024984 | GCA 001228045.1 | N/A |
| PDT000080195.2 | SAMEA1030228 | SAMEA1030228 | ERR045071 | GCA 001228065.1 | N/A |
| PDT000080200.2 | SAMEA862646  | SAMEA862646  | ERR024685 | GCA 001228265.1 | N/A |
| PDT000080204.2 | SAMEA862557  | SAMEA862557  | ERR026666 | GCA 001228365.1 | N/A |
| PDT000080208.2 | SAMEA1030141 | SAMEA1030141 | ERR044596 | GCA 001228505.1 | N/A |
| PDT000080209.2 | SAMEA862636  | SAMEA862636  | ERR024668 | GCA 001228645.1 | N/A |
| PDT000080212.2 | SAMEA862581  | SAMEA862581  | ERR026656 | GCA 001228725.1 | N/A |
| PDT000080214.2 | SAMEA862554  | SAMEA862554  | ERR026650 | GCA 001228785.1 | N/A |
| PDT000080218.2 | SAMEA734687  | SAMEA734687  | ERR017261 | GCA 001228925.1 | N/A |
| PDT000080219.2 | SAMEA862618  | SAMEA862618  | ERR026705 | GCA 001228965.1 | N/A |
| PDT000080222.2 | SAMEA862588  | SAMEA862588  | ERR025798 | GCA 001229045.1 | N/A |
| PDT000080225.2 | SAMEA734685  | SAMEA734685  | ERR017294 | GCA 001229165.1 | N/A |
| PDT000080227.2 | SAMEA1030188 | SAMEA1030188 | ERR045059 | GCA 001229205.1 | N/A |
| PDT000080229.2 | SAMEA734728  | SAMEA734728  | ERR017301 | GCA 001229285.1 | N/A |
| PDT000080230.2 | SAMEA1030245 | SAMEA1030245 | ERR044573 | GCA 001229305.1 | N/A |
| PDT000080233.2 | SAMEA1030214 | SAMEA1030214 | ERR044599 | GCA 001229405.1 | N/A |
| PDT000080234.2 | SAMEA862580  | SAMEA862580  | ERR026655 | GCA 001229425.1 | N/A |
| PDT000080236.2 | SAMEA734797  | SAMEA734797  | ERR017206 | GCA 001229565.1 | N/A |
| PDT000080237.2 | SAMEA734762  | SAMEA734762  | ERR017233 | GCA 001229585.1 | N/A |
| PDT000080239.2 | SAMEA862527  | SAMEA862527  | ERR024973 | GCA 001229625.1 | N/A |
| PDT000080242.2 | SAMEA862653  | SAMEA862653  | ERR024682 | GCA 001229745.1 | N/A |
| PDT000080245.2 | SAMEA1030218 | SAMEA1030218 | ERR045061 | GCA 001229805.1 | N/A |
| PDT000080246.2 | SAMEA734681  | SAMEA734681  | ERR017173 | GCA 001229845.1 | N/A |
| PDT000080247.2 | SAMEA1030313 | SAMEA1030313 | ERR044566 | GCA 001229865.1 | N/A |
| PDT000080249.2 | SAMEA862611  | SAMEA862611  | ERR024962 | GCA 001229905.1 | N/A |
| PDT000080250.2 | SAMEA734751  | SAMEA734751  | ERR017185 | GCA 001229925.1 | N/A |
| PDT000080252.2 | SAMEA1030227 | SAMEA1030227 | ERR044572 | GCA 001230005.1 | N/A |
| PDT000080254.2 | SAMEA734800  | SAMEA734800  | ERR017211 | GCA 001230065.1 | N/A |
| PDT000080255.2 | SAMEA1030331 | SAMEA1030331 | ERR044579 | GCA 001230105.1 | N/A |
| PDT000080258.2 | SAMEA1030259 | SAMEA1030259 | ERR044567 | GCA 001230225.1 | N/A |
| PDT000080259.2 | SAMEA862644  | SAMEA862644  | ERR024671 | GCA 001230265.1 | N/A |
| PDT000080261.2 | SAMEA862616  | SAMEA862616  | ERR024968 | GCA 001230325.1 | N/A |
| PDT000080265.2 | SAMEA734688  | SAMEA734688  | ERR017260 | GCA 001230485.1 | N/A |
| PDT000080266.2 | SAMEA862553  | SAMEA862553  | ERR026651 | GCA 001230505.1 | N/A |
| PDT000080269.2 | SAMEA734792  | SAMEA734792  | ERR017205 | GCA 001230665.1 | N/A |
| PDT000080274.2 | SAMEA734714  | SAMEA734714  | ERR017286 | GCA 001230825.1 | N/A |
| PDT000080276.2 | SAMEA862648  | SAMEA862648  | ERR024687 | GCA 001230885.1 | N/A |
| PDT000080277.2 | SAMEA862657  | SAMEA862657  | ERR024974 | GCA 001230925.1 | N/A |
| PDT000080278.2 | SAMEA862617  | SAMEA862617  | ERR024691 | GCA 001230965.1 | N/A |
| PDT000080287.2 | SAMEA862551  | SAMEA862551  | ERR024994 | GCA 001231325.1 | N/A |
| PDT000080288.2 | SAMEA862650  | SAMEA862650  | ERR024689 | GCA 001231365.1 | N/A |
| PDT000080289.2 | SAMEA734718  | SAMEA734718  | ERR017279 | GCA 001231445.1 | N/A |
| PDT000080292.2 | SAMEA734684  | SAMEA734684  | ERR017266 | GCA 001231525.1 | N/A |
| PDT000080298.2 | SAMEA1030198 | SAMEA1030198 | ERR044600 | GCA 001231865.1 | N/A |
| PDT000080300.2 | SAMEA862634  | SAMEA862634  | ERR026701 | GCA 001231925.1 | N/A |
| PDT000080301.2 | SAMEA734794  | SAMEA734794  | ERR017196 | GCA 001231945.1 | N/A |
| PDT000080303.2 | SAMEA862652  | SAMEA862652  | ERR024692 | GCA 001232005.1 | N/A |
| PDT000080305.2 | SAMEA862559  | SAMEA862559  | ERR026667 | GCA 001232045.1 | N/A |

|                |              |              |           |                 |     |
|----------------|--------------|--------------|-----------|-----------------|-----|
| PDT000080307.2 | SAMEA1030292 | SAMEA1030292 | ERR044594 | GCA 001232105.1 | N/A |
| PDT000080308.2 | SAMEA734765  | SAMEA734765  | ERR017241 | GCA 001232185.1 | N/A |
| PDT000080309.2 | SAMEA862592  | SAMEA862592  | ERR025796 | GCA 001232225.1 | N/A |
| PDT000080314.2 | SAMEA862590  | SAMEA862590  | ERR025800 | GCA 001232385.1 | N/A |
| PDT000080316.2 | SAMEA862550  | SAMEA862550  | ERR024993 | GCA 001232505.1 | N/A |
| PDT000080317.2 | SAMEA862605  | SAMEA862605  | ERR026009 | GCA 001232525.1 | N/A |
| PDT000080322.2 | SAMEA862595  | SAMEA862595  | ERR024983 | GCA 001232765.1 | N/A |
| PDT000080323.2 | SAMEA734773  | SAMEA734773  | ERR017207 | GCA 001232785.1 | N/A |
| PDT000080324.2 | SAMEA734796  | SAMEA734796  | ERR017213 | GCA 001232805.1 | N/A |
| PDT000080325.2 | SAMEA1030237 | SAMEA1030237 | ERR044602 | GCA 001232845.1 | N/A |
| PDT000080334.2 | SAMEA734693  | SAMEA734693  | ERR017255 | GCA 001233345.1 | N/A |
| PDT000080336.2 | SAMEA734781  | SAMEA734781  | ERR017253 | GCA 001233425.1 | N/A |
| PDT000080337.2 | SAMEA1030170 | SAMEA1030170 | ERR045058 | GCA 001233485.1 | N/A |
| PDT000080339.2 | SAMEA1030319 | SAMEA1030319 | ERR045066 | GCA 001233525.1 | N/A |
| PDT000080343.2 | SAMEA1030269 | SAMEA1030269 | ERR045062 | GCA 001233825.1 | N/A |
| PDT000080346.2 | SAMEA734769  | SAMEA734769  | ERR017251 | GCA 001233885.1 | N/A |
| PDT000080347.2 | SAMEA862530  | SAMEA862530  | ERR024981 | GCA 001233925.1 | N/A |
| PDT000080348.2 | SAMEA734694  | SAMEA734694  | ERR017280 | GCA 001233945.1 | N/A |
| PDT000080352.2 | SAMEA862600  | SAMEA862600  | ERR026012 | GCA 001234105.1 | N/A |
| PDT000080356.2 | SAMEA862579  | SAMEA862579  | ERR026658 | GCA 001234245.1 | N/A |
| PDT000080357.2 | SAMEA734678  | SAMEA734678  | ERR017178 | GCA 001234265.1 | N/A |
| PDT000080363.2 | SAMEA862561  | SAMEA862561  | ERR026668 | GCA 001234465.1 | N/A |
| PDT000080368.2 | SAMEA862624  | SAMEA862624  | ERR026707 | GCA 001234625.1 | N/A |
| PDT000080369.2 | SAMEA734763  | SAMEA734763  | ERR017236 | GCA 001234645.1 | N/A |
| PDT000080370.2 | SAMEA734784  | SAMEA734784  | ERR017245 | GCA 001234705.1 | N/A |
| PDT000080371.2 | SAMEA1030251 | SAMEA1030251 | ERR045064 | GCA 001234725.1 | N/A |
| PDT000080372.2 | SAMEA862545  | SAMEA862545  | ERR024988 | GCA 001234765.1 | N/A |
| PDT000080373.2 | SAMEA862651  | SAMEA862651  | ERR024688 | GCA 001234785.1 | N/A |
| PDT000080375.2 | SAMEA734675  | SAMEA734675  | ERR017175 | GCA 001234845.1 | N/A |
| PDT000080376.2 | SAMEA734711  | SAMEA734711  | ERR017284 | GCA 001234905.1 | N/A |
| PDT000080377.2 | SAMEA734738  | SAMEA734738  | ERR017222 | GCA 001234925.1 | N/A |
| PDT000080379.2 | SAMEA1030169 | SAMEA1030169 | ERR044598 | GCA 001235025.1 | N/A |
| PDT000080383.2 | SAMEA862544  | SAMEA862544  | ERR024986 | GCA 001235205.1 | N/A |
| PDT000080384.2 | SAMEA734782  | SAMEA734782  | ERR017243 | GCA 001235225.1 | N/A |
| PDT000080392.2 | SAMEA734744  | SAMEA734744  | ERR017239 | GCA 001235425.1 | N/A |
| PDT000080394.2 | SAMEA862555  | SAMEA862555  | ERR026664 | GCA 001235465.1 | N/A |
| PDT000080395.2 | SAMEA862603  | SAMEA862603  | ERR026011 | GCA 001235485.1 | N/A |
| PDT000080396.2 | SAMEA734734  | SAMEA734734  | ERR017201 | GCA 001235525.1 | N/A |
| PDT000080403.2 | SAMEA734676  | SAMEA734676  | ERR017170 | GCA 001235725.1 | N/A |
| PDT000080405.2 | SAMEA734770  | SAMEA734770  | ERR017250 | GCA 001235785.1 | N/A |
| PDT000080413.2 | SAMEA862632  | SAMEA862632  | ERR024675 | GCA 001236045.1 | N/A |
| PDT000080414.2 | SAMEA862608  | SAMEA862608  | ERR024963 | GCA 001236065.1 | N/A |
| PDT000080416.2 | SAMEA734706  | SAMEA734706  | ERR017282 | GCA 001236185.1 | N/A |
| PDT000080418.2 | SAMEA862623  | SAMEA862623  | ERR026708 | GCA 001236265.1 | N/A |
| PDT000080423.2 | SAMEA734731  | SAMEA734731  | ERR017296 | GCA 001236465.1 | N/A |
| PDT000080425.2 | SAMEA862583  | SAMEA862583  | ERR026649 | GCA 001236505.1 | N/A |
| PDT000080427.2 | SAMEA734795  | SAMEA734795  | ERR017214 | GCA 001236585.1 | N/A |
| PDT000080431.2 | SAMEA734733  | SAMEA734733  | ERR017200 | GCA 001236825.1 | N/A |
| PDT000080432.2 | SAMEA862625  | SAMEA862625  | ERR026706 | GCA 001236885.1 | N/A |
| PDT000080433.2 | SAMEA734760  | SAMEA734760  | ERR017191 | GCA 001236925.1 | N/A |
| PDT000080435.2 | SAMEA734788  | SAMEA734788  | ERR017249 | GCA 001236985.1 | N/A |
| PDT000080442.2 | SAMEA734758  | SAMEA734758  | ERR017181 | GCA 001237225.1 | N/A |
| PDT000080445.2 | SAMEA862620  | SAMEA862620  | ERR026703 | GCA 001237305.1 | N/A |
| PDT000080447.2 | SAMEA862637  | SAMEA862637  | ERR024672 | GCA 001237365.1 | N/A |
| PDT000080450.2 | SAMEA734753  | SAMEA734753  | ERR017190 | GCA 001237445.1 | N/A |
| PDT000080453.2 | SAMEA862607  | SAMEA862607  | ERR024966 | GCA 001237525.1 | N/A |
| PDT000080454.2 | SAMEA734739  | SAMEA734739  | ERR017223 | GCA 001237625.1 | N/A |
| PDT000080459.2 | SAMEA734777  | SAMEA734777  | ERR017226 | GCA 001237765.1 | N/A |
| PDT000080461.2 | SAMEA862562  | SAMEA862562  | ERR024980 | GCA 001237845.1 | N/A |
| PDT000080462.2 | SAMEA734725  | SAMEA734725  | ERR017298 | GCA 001237905.1 | N/A |
| PDT000080464.2 | SAMEA734715  | SAMEA734715  | ERR017285 | GCA 001237945.1 | N/A |
| PDT000080466.2 | SAMEA1030334 | SAMEA1030334 | ERR044580 | GCA 001238005.1 | N/A |
| PDT000080467.2 | SAMEA734766  | SAMEA734766  | ERR017242 | GCA 001238025.1 | N/A |
| PDT000080470.2 | SAMEA734727  | SAMEA734727  | ERR017300 | GCA 001238145.1 | N/A |
| PDT000080490.2 | SAMEA1030150 | SAMEA1030150 | ERR045056 | GCA 001238725.1 | N/A |
| PDT000080495.2 | SAMEA862639  | SAMEA862639  | ERR024678 | GCA 001238925.1 | N/A |
| PDT000080500.2 | SAMEA1030252 | SAMEA1030252 | ERR044569 | GCA 001239145.1 | N/A |
| PDT000080501.2 | SAMEA734701  | SAMEA734701  | ERR017274 | GCA 001239165.1 | N/A |

|                |              |              |            |                 |     |
|----------------|--------------|--------------|------------|-----------------|-----|
| PDT000080502.2 | SAMEA862593  | SAMEA862593  | ERR025805  | GCA 001239185.1 | N/A |
| PDT000080504.2 | SAMEA862627  | SAMEA862627  | ERR026710  | GCA 001239245.1 | N/A |
| PDT000080506.2 | SAMEA1030162 | SAMEA1030162 | ERR044577  | GCA 001239385.1 | N/A |
| PDT000080507.2 | SAMEA1030204 | SAMEA1030204 | ERR044574  | GCA 001239405.1 | N/A |
| PDT000080514.2 | SAMEA862613  | SAMEA862613  | ERR024958  | GCA 001239585.1 | N/A |
| PDT000080518.2 | SAMEA862609  | SAMEA862609  | ERR024964  | GCA 001239705.1 | N/A |
| PDT000082663.3 | SAMN04022940 | SAMN04022940 | SRR2976830 | GCA 015618745.1 | N/A |
| PDT000082665.2 | SAMN04022950 | SAMN04022950 | SRR2225893 | GCA 015619185.1 | N/A |
| PDT000082677.2 | SAMN04022948 | SAMN04022948 | SRR2225905 | GCA 015619865.1 | N/A |
| PDT000082678.2 | SAMN04022949 | SAMN04022949 | SRR2225906 | GCA 015619165.1 | N/A |
| PDT000082723.2 | SAMN03753597 | SAMN03753597 | SRR2059971 | GCA 001275825.1 | N/A |
| PDT000082730.2 | SAMN03753625 | SAMN03753625 | SRR2059991 | GCA 001275955.1 | N/A |
| PDT000082731.2 | SAMN03753626 | SAMN03753626 | SRR2059998 | GCA 001275985.1 | N/A |
| PDT000083684.2 | SAMEA2236411 | SAMEA2236411 | ERR422864  | GCA 001287505.1 | N/A |
| PDT000083685.2 | SAMEA2384472 | SAMEA2384472 | ERR554394  | GCA 001287525.1 | N/A |
| PDT000083686.2 | SAMEA2384061 | SAMEA2384061 | ERR540265  | GCA 001287545.1 | N/A |
| PDT000083687.2 | SAMEA2384795 | SAMEA2384795 | ERR554717  | GCA 001287565.1 | N/A |
| PDT000083690.2 | SAMEA2384638 | SAMEA2384638 | ERR554560  | GCA 001287625.1 | N/A |
| PDT000083691.2 | SAMEA2384454 | SAMEA2384454 | ERR554376  | GCA 001287645.1 | N/A |
| PDT000083692.2 | SAMEA2384440 | SAMEA2384440 | ERR554363  | GCA 001287665.1 | N/A |
| PDT000083693.2 | SAMEA2384817 | SAMEA2384817 | ERR554739  | GCA 001287685.1 | N/A |
| PDT000083694.2 | SAMEA2236453 | SAMEA2236453 | ERR422999  | GCA 001287705.1 | N/A |
| PDT000083695.2 | SAMEA2236488 | SAMEA2236488 | ERR422941  | GCA 001287725.1 | N/A |
| PDT000083696.2 | SAMEA2384578 | SAMEA2384578 | ERR554500  | GCA 001287745.1 | N/A |
| PDT000083697.2 | SAMEA2384582 | SAMEA2384582 | ERR554504  | GCA 001287765.1 | N/A |
| PDT000083698.2 | SAMEA2236475 | SAMEA2236475 | ERR422928  | GCA 001287785.1 | N/A |
| PDT000083699.2 | SAMEA2384851 | SAMEA2384851 | ERR554773  | GCA 001287805.1 | N/A |
| PDT000083700.2 | SAMEA2445599 | SAMEA2445599 | ERR573302  | GCA 001287825.1 | N/A |
| PDT000083701.2 | SAMEA2384054 | SAMEA2384054 | ERR540258  | GCA 001287845.1 | N/A |
| PDT000083702.2 | SAMEA2384494 | SAMEA2384494 | ERR554416  | GCA 001287865.1 | N/A |
| PDT000083706.2 | SAMEA2384806 | SAMEA2384806 | ERR554728  | GCA 001287945.1 | N/A |
| PDT000083707.2 | SAMEA2384685 | SAMEA2384685 | ERR554607  | GCA 001287965.1 | N/A |
| PDT000083708.2 | SAMEA2384883 | SAMEA2384883 | ERR554805  | GCA 001287985.1 | N/A |
| PDT000083710.2 | SAMEA2236482 | SAMEA2236482 | ERR422935  | GCA 001288025.1 | N/A |
| PDT000083712.2 | SAMEA2384415 | SAMEA2384415 | ERR554338  | GCA 001288065.1 | N/A |
| PDT000083713.2 | SAMEA2236421 | SAMEA2236421 | ERR422967  | GCA 001288085.1 | N/A |
| PDT000083714.2 | SAMEA2445662 | SAMEA2445662 | ERR573365  | GCA 001288105.1 | N/A |
| PDT000083715.2 | SAMEA2384867 | SAMEA2384867 | ERR554789  | GCA 001288125.1 | N/A |
| PDT000083716.2 | SAMEA2384581 | SAMEA2384581 | ERR554503  | GCA 001288145.1 | N/A |
| PDT000083717.2 | SAMEA2445537 | SAMEA2445537 | ERR573240  | GCA 001288165.1 | N/A |
| PDT000083720.2 | SAMEA2384040 | SAMEA2384040 | ERR540244  | GCA 001288225.1 | N/A |
| PDT000083721.2 | SAMEA2384614 | SAMEA2384614 | ERR554536  | GCA 001288245.1 | N/A |
| PDT000083722.2 | SAMEA2384874 | SAMEA2384874 | ERR554796  | GCA 001288265.1 | N/A |
| PDT000083723.2 | SAMEA2384515 | SAMEA2384515 | ERR554437  | GCA 001288305.1 | N/A |
| PDT000083726.2 | SAMEA2384669 | SAMEA2384669 | ERR554591  | GCA 001288365.1 | N/A |
| PDT000083727.2 | SAMEA2384053 | SAMEA2384053 | ERR540257  | GCA 001288385.1 | N/A |
| PDT000083728.2 | SAMEA2384125 | SAMEA2384125 | ERR540329  | GCA 001288405.1 | N/A |
| PDT000083729.2 | SAMEA2445513 | SAMEA2445513 | ERR573216  | GCA 001288425.1 | N/A |
| PDT000083730.2 | SAMEA2384055 | SAMEA2384055 | ERR540259  | GCA 001288445.1 | N/A |
| PDT000083731.2 | SAMEA2236456 | SAMEA2236456 | ERR423002  | GCA 001288465.1 | N/A |
| PDT000083732.2 | SAMEA2236445 | SAMEA2236445 | ERR422991  | GCA 001288485.1 | N/A |
| PDT000083733.2 | SAMEA2236471 | SAMEA2236471 | ERR422924  | GCA 001288505.1 | N/A |
| PDT000083734.2 | SAMEA2384695 | SAMEA2384695 | ERR554617  | GCA 001288525.1 | N/A |
| PDT000083735.2 | SAMEA2384848 | SAMEA2384848 | ERR554770  | GCA 001288545.1 | N/A |
| PDT000083736.2 | SAMEA2384882 | SAMEA2384882 | ERR554804  | GCA 001288565.1 | N/A |
| PDT000083737.2 | SAMEA2236406 | SAMEA2236406 | ERR422952  | GCA 001288585.1 | N/A |
| PDT000083738.2 | SAMEA2384586 | SAMEA2384586 | ERR554508  | GCA 001288605.1 | N/A |
| PDT000083740.2 | SAMEA2384608 | SAMEA2384608 | ERR554530  | GCA 001288645.1 | N/A |
| PDT000083741.2 | SAMEA2236495 | SAMEA2236495 | ERR423041  | GCA 001288665.1 | N/A |
| PDT000083744.2 | SAMEA2236438 | SAMEA2236438 | ERR422984  | GCA 001288725.1 | N/A |
| PDT000083746.2 | SAMEA2384280 | SAMEA2384280 | ERR554204  | GCA 001288765.1 | N/A |
| PDT000083747.2 | SAMEA2384116 | SAMEA2384116 | ERR540320  | GCA 001288785.1 | N/A |
| PDT000083748.2 | SAMEA2384288 | SAMEA2384288 | ERR554212  | GCA 001288805.1 | N/A |
| PDT000083749.2 | SAMEA2384622 | SAMEA2384622 | ERR554544  | GCA 001288825.1 | N/A |
| PDT000083751.2 | SAMEA2384464 | SAMEA2384464 | ERR554386  | GCA 001288865.1 | N/A |
| PDT000083752.2 | SAMEA2384087 | SAMEA2384087 | ERR540291  | GCA 001288885.1 | N/A |
| PDT000083753.2 | SAMEA2445521 | SAMEA2445521 | ERR573224  | GCA 001288905.1 | N/A |
| PDT000083755.2 | SAMEA2063840 | SAMEA2063840 | ERR332275  | GCA 001288945.1 | N/A |



|                |              |              |           |                 |     |
|----------------|--------------|--------------|-----------|-----------------|-----|
| PDT000083757.2 | SAMEA2445655 | SAMEA2445655 | ERR573358 | GCA 001288985.1 | N/A |
| PDT000083758.2 | SAMEA2236487 | SAMEA2236487 | ERR422940 | GCA 001289005.1 | N/A |
| PDT000083759.2 | SAMEA2384126 | SAMEA2384126 | ERR540330 | GCA 001289025.1 | N/A |
| PDT000083761.2 | SAMEA2384842 | SAMEA2384842 | ERR554764 | GCA 001289065.1 | N/A |
| PDT000083762.2 | SAMEA2236494 | SAMEA2236494 | ERR423040 | GCA 001289085.1 | N/A |
| PDT000083763.2 | SAMEA2384547 | SAMEA2384547 | ERR554469 | GCA 001289105.1 | N/A |
| PDT000083764.2 | SAMEA2383967 | SAMEA2383967 | ERR540171 | GCA 001289125.1 | N/A |
| PDT000083766.2 | SAMEA2384296 | SAMEA2384296 | ERR554220 | GCA 001289165.1 | N/A |
| PDT000083767.2 | SAMEA2383983 | SAMEA2383983 | ERR540187 | GCA 001289185.1 | N/A |
| PDT000083768.2 | SAMEA2384676 | SAMEA2384676 | ERR554598 | GCA 001289205.1 | N/A |
| PDT000083769.2 | SAMEA2236486 | SAMEA2236486 | ERR422939 | GCA 001289225.1 | N/A |
| PDT000083770.2 | SAMEA2384084 | SAMEA2384084 | ERR540288 | GCA 001289245.1 | N/A |
| PDT000083771.2 | SAMEA2236413 | SAMEA2236413 | ERR422959 | GCA 001289265.1 | N/A |
| PDT000083772.2 | SAMEA2384304 | SAMEA2384304 | ERR554228 | GCA 001289285.1 | N/A |
| PDT000083775.2 | SAMEA2236492 | SAMEA2236492 | ERR423038 | GCA 001289345.1 | N/A |
| PDT000083776.2 | SAMEA2384462 | SAMEA2384462 | ERR554384 | GCA 001289365.1 | N/A |
| PDT000083778.2 | SAMEA2384001 | SAMEA2384001 | ERR540205 | GCA 001289405.1 | N/A |
| PDT000083779.2 | SAMEA2384724 | SAMEA2384724 | ERR554646 | GCA 001289425.1 | N/A |
| PDT000083780.2 | SAMEA2384571 | SAMEA2384571 | ERR554493 | GCA 001289445.1 | N/A |
| PDT000083781.2 | SAMEA2384092 | SAMEA2384092 | ERR540296 | GCA 001289465.1 | N/A |
| PDT000083782.2 | SAMEA2383481 | SAMEA2383481 | ERR539878 | GCA 001289485.1 | N/A |
| PDT000083783.2 | SAMEA2384621 | SAMEA2384621 | ERR554543 | GCA 001289505.1 | N/A |
| PDT000083784.2 | SAMEA2384645 | SAMEA2384645 | ERR554567 | GCA 001289525.1 | N/A |
| PDT000083786.2 | SAMEA2383959 | SAMEA2383959 | ERR540163 | GCA 001289565.1 | N/A |
| PDT000083787.2 | SAMEA2384431 | SAMEA2384431 | ERR554354 | GCA 001289585.1 | N/A |
| PDT000083789.2 | SAMEA2236461 | SAMEA2236461 | ERR422914 | GCA 001289625.1 | N/A |
| PDT000083792.2 | SAMEA2236433 | SAMEA2236433 | ERR422886 | GCA 001289685.1 | N/A |
| PDT000083794.2 | SAMEA2384574 | SAMEA2384574 | ERR554496 | GCA 001289725.1 | N/A |
| PDT000083798.2 | SAMEA2384661 | SAMEA2384661 | ERR554583 | GCA 001289805.1 | N/A |
| PDT000083799.2 | SAMEA2236463 | SAMEA2236463 | ERR423009 | GCA 001289825.1 | N/A |
| PDT000083800.2 | SAMEA2236460 | SAMEA2236460 | ERR422913 | GCA 001289845.1 | N/A |
| PDT000083801.2 | SAMEA2236424 | SAMEA2236424 | ERR422877 | GCA 001289865.1 | N/A |
| PDT000083803.2 | SAMEA2236490 | SAMEA2236490 | ERR422943 | GCA 001289905.1 | N/A |
| PDT000083804.2 | SAMEA2384875 | SAMEA2384875 | ERR554797 | GCA 001289925.1 | N/A |
| PDT000083805.2 | SAMEA2384551 | SAMEA2384551 | ERR554473 | GCA 001289945.1 | N/A |
| PDT000083806.2 | SAMEA2384249 | SAMEA2384249 | ERR554173 | GCA 001289965.1 | N/A |
| PDT000083807.2 | SAMEA2384093 | SAMEA2384093 | ERR540297 | GCA 001289985.1 | N/A |
| PDT000083808.2 | SAMEA2384822 | SAMEA2384822 | ERR554744 | GCA 001290005.1 | N/A |
| PDT000083809.2 | SAMEA2384787 | SAMEA2384787 | ERR554709 | GCA 001290025.1 | N/A |
| PDT000083810.2 | SAMEA2445553 | SAMEA2445553 | ERR573256 | GCA 001290045.1 | N/A |
| PDT000083811.2 | SAMEA2236497 | SAMEA2236497 | ERR423043 | GCA 001290065.1 | N/A |
| PDT000083812.2 | SAMEA2383975 | SAMEA2383975 | ERR540179 | GCA 001290085.1 | N/A |
| PDT000083813.2 | SAMEA2236405 | SAMEA2236405 | ERR422951 | GCA 001290105.1 | N/A |
| PDT000083815.2 | SAMEA2384009 | SAMEA2384009 | ERR540213 | GCA 001290145.1 | N/A |
| PDT000083816.2 | SAMEA2384430 | SAMEA2384430 | ERR554353 | GCA 001290165.1 | N/A |
| PDT000083817.2 | SAMEA2384124 | SAMEA2384124 | ERR540328 | GCA 001290185.1 | N/A |
| PDT000083819.2 | SAMEA2384102 | SAMEA2384102 | ERR540306 | GCA 001290225.1 | N/A |
| PDT000083820.2 | SAMEA2384565 | SAMEA2384565 | ERR554487 | GCA 001290245.1 | N/A |
| PDT000083822.2 | SAMEA2384838 | SAMEA2384838 | ERR554760 | GCA 001290285.1 | N/A |
| PDT000083824.2 | SAMEA2236420 | SAMEA2236420 | ERR422873 | GCA 001290325.1 | N/A |
| PDT000083825.2 | SAMEA2383487 | SAMEA2383487 | ERR539884 | GCA 001290345.1 | N/A |
| PDT000083827.2 | SAMEA2384233 | SAMEA2384233 | ERR554157 | GCA 001290385.1 | N/A |
| PDT000083828.2 | SAMEA2384471 | SAMEA2384471 | ERR554393 | GCA 001290405.1 | N/A |
| PDT000083830.2 | SAMEA2445545 | SAMEA2445545 | ERR573248 | GCA 001290445.1 | N/A |
| PDT000083831.2 | SAMEA2384807 | SAMEA2384807 | ERR554729 | GCA 001290465.1 | N/A |
| PDT000083832.2 | SAMEA2384264 | SAMEA2384264 | ERR554188 | GCA 001290485.1 | N/A |
| PDT000083833.2 | SAMEA2384859 | SAMEA2384859 | ERR554781 | GCA 001290505.1 | N/A |
| PDT000083834.2 | SAMEA2384815 | SAMEA2384815 | ERR554737 | GCA 001290525.1 | N/A |
| PDT000083835.2 | SAMEA2384423 | SAMEA2384423 | ERR554346 | GCA 001290545.1 | N/A |
| PDT000083836.2 | SAMEA2383465 | SAMEA2383465 | ERR539862 | GCA 001290565.1 | N/A |
| PDT000083837.2 | SAMEA2236477 | SAMEA2236477 | ERR423023 | GCA 001290585.1 | N/A |
| PDT000083838.2 | SAMEA2384590 | SAMEA2384590 | ERR554512 | GCA 001290605.1 | N/A |
| PDT000083839.2 | SAMEA2384542 | SAMEA2384542 | ERR554464 | GCA 001290625.1 | N/A |
| PDT000083840.2 | SAMEA2384671 | SAMEA2384671 | ERR554593 | GCA 001290645.1 | N/A |
| PDT000083841.2 | SAMEA2236414 | SAMEA2236414 | ERR422960 | GCA 001290665.1 | N/A |
| PDT000083842.2 | SAMEA2384543 | SAMEA2384543 | ERR554465 | GCA 001290685.1 | N/A |
| PDT000083843.2 | SAMEA2384077 | SAMEA2384077 | ERR540281 | GCA 001290705.1 | N/A |
| PDT000083844.2 | SAMEA2384070 | SAMEA2384070 | ERR540274 | GCA 001290725.1 | N/A |

|                |              |              |            |                 |     |
|----------------|--------------|--------------|------------|-----------------|-----|
| PDT000083847.2 | SAMEA2445632 | SAMEA2445632 | ERR573335  | GCA 001290785.1 | N/A |
| PDT000083848.2 | SAMEA2384422 | SAMEA2384422 | ERR554345  | GCA 001290805.1 | N/A |
| PDT000083849.2 | SAMEA2384076 | SAMEA2384076 | ERR540280  | GCA 001290825.1 | N/A |
| PDT000083851.2 | SAMEA2236432 | SAMEA2236432 | ERR422885  | GCA 001290865.1 | N/A |
| PDT000083852.2 | SAMEA2445664 | SAMEA2445664 | ERR573367  | GCA 001290885.1 | N/A |
| PDT000083853.2 | SAMEA2384052 | SAMEA2384052 | ERR540256  | GCA 001290905.1 | N/A |
| PDT000083855.2 | SAMEA2384538 | SAMEA2384538 | ERR554460  | GCA 001290945.1 | N/A |
| PDT000083856.2 | SAMEA2384094 | SAMEA2384094 | ERR540298  | GCA 001290965.1 | N/A |
| PDT000083857.2 | SAMEA2384068 | SAMEA2384068 | ERR540272  | GCA 001290985.1 | N/A |
| PDT000083859.2 | SAMEA2384843 | SAMEA2384843 | ERR554765  | GCA 001291025.1 | N/A |
| PDT000083860.2 | SAMEA2236457 | SAMEA2236457 | ERR422910  | GCA 001291045.1 | N/A |
| PDT000083862.2 | SAMEA2236415 | SAMEA2236415 | ERR422961  | GCA 001291085.1 | N/A |
| PDT000083863.2 | SAMEA2384573 | SAMEA2384573 | ERR554495  | GCA 001291105.1 | N/A |
| PDT000083864.2 | SAMEA2236450 | SAMEA2236450 | ERR422903  | GCA 001291125.1 | N/A |
| PDT000083865.2 | SAMEA2236474 | SAMEA2236474 | ERR422927  | GCA 001291145.1 | N/A |
| PDT000083867.2 | SAMEA2445525 | SAMEA2445525 | ERR573228  | GCA 001291185.1 | N/A |
| PDT000083868.2 | SAMEA2383993 | SAMEA2383993 | ERR540197  | GCA 001291205.1 | N/A |
| PDT000083870.2 | SAMEA2384684 | SAMEA2384684 | ERR554606  | GCA 001291245.1 | N/A |
| PDT000083871.2 | SAMEA2384241 | SAMEA2384241 | ERR554165  | GCA 001291265.1 | N/A |
| PDT000083872.2 | SAMEA2384523 | SAMEA2384523 | ERR554445  | GCA 001291285.1 | N/A |
| PDT000083874.2 | SAMEA2384624 | SAMEA2384624 | ERR554546  | GCA 001291325.1 | N/A |
| PDT000084514.2 | SAMN03658594 | SAMN03658594 | SRR2107117 | GCA 001297285.1 | N/A |
| PDT000084519.2 | SAMN03658592 | SAMN03658592 | SRR2107115 | GCA 001297395.1 | N/A |
| PDT000084520.2 | SAMN03658597 | SAMN03658597 | SRR2107120 | GCA 001297365.1 | N/A |
| PDT000084521.2 | SAMN03658596 | SAMN03658596 | SRR2107119 | GCA 001297455.1 | N/A |
| PDT000084522.2 | SAMN03658600 | SAMN03658600 | SRR2107104 | GCA 001297475.1 | N/A |
| PDT000084525.2 | SAMN03658595 | SAMN03658595 | SRR2107118 | GCA 001297545.1 | N/A |
| PDT000084527.2 | SAMN03658601 | SAMN03658601 | SRR2107105 | GCA 001297555.1 | N/A |
| PDT000084528.2 | SAMN03658593 | SAMN03658593 | SRR2107116 | GCA 001297525.1 | N/A |
| PDT000084529.2 | SAMN03658602 | SAMN03658602 | SRR2107106 | GCA 001297605.1 | N/A |
| PDT000084531.2 | SAMN03658607 | SAMN03658607 | SRR2107111 | GCA 001297635.1 | N/A |
| PDT000084532.2 | SAMN03658608 | SAMN03658608 | SRR2107113 | GCA 001297665.1 | N/A |
| PDT000090341.2 | SAMEA1463418 | SAMEA1463418 | ERR156337  | GCA 001349455.1 | N/A |
| PDT000090346.2 | SAMEA1463437 | SAMEA1463437 | ERR144828  | GCA 001349555.1 | N/A |
| PDT000090351.2 | SAMEA1463455 | SAMEA1463455 | ERR144827  | GCA 001349655.1 | N/A |
| PDT000090357.2 | SAMEA1708659 | SAMEA1708659 | ERR234861  | GCA 001349775.1 | N/A |
| PDT000090358.2 | SAMEA1708665 | SAMEA1708665 | ERR234862  | GCA 001349795.1 | N/A |
| PDT000090359.2 | SAMEA1708667 | SAMEA1708667 | ERR237621  | GCA 001349815.1 | N/A |
| PDT000090360.2 | SAMEA1708727 | SAMEA1708727 | ERR234880  | GCA 001349835.1 | N/A |
| PDT000090363.2 | SAMEA1708867 | SAMEA1708867 | ERR234845  | GCA 001349895.1 | N/A |
| PDT000090364.2 | SAMEA1708917 | SAMEA1708917 | ERR237635  | GCA 001349915.1 | N/A |
| PDT000090365.2 | SAMEA1708948 | SAMEA1708948 | ERR234869  | GCA 001349935.1 | N/A |
| PDT000090366.2 | SAMEA1708968 | SAMEA1708968 | ERR234885  | GCA 001349955.1 | N/A |
| PDT000090367.2 | SAMEA1708973 | SAMEA1708973 | ERR234840  | GCA 001349975.1 | N/A |
| PDT000090368.2 | SAMEA1709014 | SAMEA1709014 | ERR234823  | GCA 001349995.1 | N/A |
| PDT000090429.2 | SAMEA1324533 | SAMEA1324533 | ERR134872  | GCA 001351675.1 | N/A |
| PDT000090433.2 | SAMEA1324543 | SAMEA1324543 | ERR134686  | GCA 001351755.1 | N/A |
| PDT000090437.2 | SAMEA1324555 | SAMEA1324555 | ERR134712  | GCA 001351835.1 | N/A |
| PDT000090446.2 | SAMEA1324568 | SAMEA1324568 | ERR134792  | GCA 001352015.1 | N/A |
| PDT000090450.2 | SAMEA1324578 | SAMEA1324578 | ERR134646  | GCA 001352095.1 | N/A |
| PDT000090456.2 | SAMEA1324601 | SAMEA1324601 | ERR134767  | GCA 001352215.1 | N/A |
| PDT000090468.2 | SAMEA1324639 | SAMEA1324639 | ERR134631  | GCA 001352455.1 | N/A |
| PDT000090472.2 | SAMEA1324656 | SAMEA1324656 | ERR134703  | GCA 001352535.1 | N/A |
| PDT000090474.2 | SAMEA1324664 | SAMEA1324664 | ERR134733  | GCA 001352575.1 | N/A |
| PDT000090475.2 | SAMEA1324666 | SAMEA1324666 | ERR134818  | GCA 001352595.1 | N/A |
| PDT000090483.2 | SAMEA1324694 | SAMEA1324694 | ERR134665  | GCA 001352755.1 | N/A |
| PDT000090491.2 | SAMEA1324714 | SAMEA1324714 | ERR134774  | GCA 001352915.1 | N/A |
| PDT000090496.2 | SAMEA1324729 | SAMEA1324729 | ERR134688  | GCA 001353015.1 | N/A |
| PDT000090503.2 | SAMEA1324742 | SAMEA1324742 | ERR134772  | GCA 001353155.1 | N/A |
| PDT000090512.2 | SAMEA1324765 | SAMEA1324765 | ERR134802  | GCA 001353335.1 | N/A |
| PDT000090514.2 | SAMEA1324769 | SAMEA1324769 | ERR134658  | GCA 001353375.1 | N/A |
| PDT000090517.2 | SAMEA1466449 | SAMEA1466449 | ERR137979  | GCA 001353435.1 | N/A |
| PDT000090523.2 | SAMEA1466463 | SAMEA1466463 | ERR302742  | GCA 001353555.1 | N/A |
| PDT000090524.2 | SAMEA1466464 | SAMEA1466464 | ERR302770  | GCA 001353575.1 | N/A |
| PDT000090526.2 | SAMEA1466469 | SAMEA1466469 | ERR137907  | GCA 001353615.1 | N/A |
| PDT000090527.2 | SAMEA1466472 | SAMEA1466472 | ERR137922  | GCA 001353635.1 | N/A |
| PDT000090530.2 | SAMEA1466486 | SAMEA1466486 | ERR302836  | GCA 001353695.1 | N/A |
| PDT000090536.2 | SAMEA1466497 | SAMEA1466497 | ERR137958  | GCA 001353815.1 | N/A |

|                |              |              |            |                 |     |
|----------------|--------------|--------------|------------|-----------------|-----|
| PDT000090538.2 | SAMEA1466499 | SAMEA1466499 | ERR302785  | GCA 001353855.1 | N/A |
| PDT000090543.2 | SAMEA1466509 | SAMEA1466509 | ERR302793  | GCA 001353955.1 | N/A |
| PDT000090553.2 | SAMEA1466530 | SAMEA1466530 | ERR302749  | GCA 001354155.1 | N/A |
| PDT000090557.2 | SAMEA1466536 | SAMEA1466536 | ERR137952  | GCA 001354235.1 | N/A |
| PDT000090560.2 | SAMEA1466543 | SAMEA1466543 | ERR302810  | GCA 001354295.1 | N/A |
| PDT000090571.2 | SAMEA1710112 | SAMEA1710112 | ERR256873  | GCA 001354515.1 | N/A |
| PDT000090632.2 | SAMEA1464023 | SAMEA1464023 | ERR698916  | GCA 001369415.1 | N/A |
| PDT000100499.3 | SAMN03996293 | SAMN03996293 | SRR2822472 | GCA 001471675.2 | N/A |
| PDT000100500.3 | SAMN03996279 | SAMN03996279 | SRR2820039 | GCA 001471695.2 | N/A |
| PDT000100501.3 | SAMN03996284 | SAMN03996284 | SRR2820650 | GCA 001471715.2 | N/A |
| PDT000106517.2 | SAMN03948579 | SAMN03948579 | SRR2138597 | GCA 001546605.1 | N/A |
| PDT000106730.3 | SAMN03996304 | SAMN03996304 | SRR2822404 | GCA 001558795.2 | N/A |
| PDT000107931.1 | SAMN04456593 | SAMN04456593 | SRR3168638 | GCA 015619305.1 | N/A |
| PDT000108564.1 | SAMN03359292 | SAMN03359292 | SRR1814479 | GCA 015618925.1 | N/A |
| PDT000108573.1 | SAMN03359301 | SAMN03359301 | SRR1814488 | GCA 015619745.1 | N/A |
| PDT000108577.1 | SAMN03359305 | SAMN03359305 | SRR1814492 | GCA 015619765.1 | N/A |
| PDT000108580.1 | SAMN03359308 | SAMN03359308 | SRR1814495 | GCA 015619065.1 | N/A |
| PDT000108588.1 | SAMN03359316 | SAMN03359316 | SRR1814503 | GCA 015619515.1 | N/A |
| PDT000108589.1 | SAMN03359317 | SAMN03359317 | SRR1814504 | GCA 015619615.1 | N/A |
| PDT000108599.1 | SAMN03359327 | SAMN03359327 | SRR1814514 | GCA 015618965.1 | N/A |
| PDT000108604.1 | SAMN03359332 | SAMN03359332 | SRR1814519 | GCA 015618625.1 | N/A |
| PDT000108605.1 | SAMN03359333 | SAMN03359333 | SRR1814520 | GCA 015618685.1 | N/A |
| PDT000108609.1 | SAMN03359337 | SAMN03359337 | SRR1814524 | GCA 015618505.1 | N/A |
| PDT000108614.1 | SAMN03359342 | SAMN03359342 | SRR1814529 | GCA 015617145.1 | N/A |
| PDT000108617.1 | SAMN03359345 | SAMN03359345 | SRR1814532 | GCA 015617405.1 | N/A |
| PDT000108618.1 | SAMN03359346 | SAMN03359346 | SRR1814533 | GCA 015617495.1 | N/A |
| PDT000108619.1 | SAMN03359347 | SAMN03359347 | SRR1814534 | GCA 015617485.1 | N/A |
| PDT000108624.1 | SAMN03359352 | SAMN03359352 | SRR1814539 | GCA 015617465.1 | N/A |
| PDT000108625.1 | SAMN03359353 | SAMN03359353 | SRR1814540 | GCA 015617445.1 | N/A |
| PDT000108626.1 | SAMN03359354 | SAMN03359354 | SRR1814541 | GCA 015618605.1 | N/A |
| PDT000108627.1 | SAMN03359355 | SAMN03359355 | SRR1814542 | GCA 015617945.1 | N/A |
| PDT000108629.1 | SAMN03359357 | SAMN03359357 | SRR1814544 | GCA 015618345.1 | N/A |
| PDT000108632.1 | SAMN03359360 | SAMN03359360 | SRR1814547 | GCA 015617425.1 | N/A |
| PDT000108634.1 | SAMN03359362 | SAMN03359362 | SRR1814549 | GCA 015617545.1 | N/A |
| PDT000108640.1 | SAMN03359368 | SAMN03359368 | SRR1814555 | GCA 015617205.1 | N/A |
| PDT000108641.1 | SAMN03359369 | SAMN03359369 | SRR1814556 | GCA 015617305.1 | N/A |
| PDT000108643.1 | SAMN03359371 | SAMN03359371 | SRR1814558 | GCA 015617745.1 | N/A |
| PDT000108646.1 | SAMN03359374 | SAMN03359374 | SRR1814561 | GCA 015617845.1 | N/A |
| PDT000108647.1 | SAMN03359375 | SAMN03359375 | SRR1814562 | GCA 015618545.1 | N/A |
| PDT000108648.1 | SAMN03359376 | SAMN03359376 | SRR1814563 | GCA 015617725.1 | N/A |
| PDT000108649.1 | SAMN03359377 | SAMN03359377 | SRR1814564 | GCA 015617805.1 | N/A |
| PDT000108654.1 | SAMN03359382 | SAMN03359382 | SRR1814569 | GCA 015617605.1 | N/A |
| PDT000108655.1 | SAMN03359383 | SAMN03359383 | SRR1814570 | GCA 015617645.1 | N/A |
| PDT000108657.1 | SAMN03359385 | SAMN03359385 | SRR1814572 | GCA 015617565.1 | N/A |
| PDT000108661.1 | SAMN03359389 | SAMN03359389 | SRR1814576 | GCA 015617125.1 | N/A |
| PDT000108662.1 | SAMN03359390 | SAMN03359390 | SRR1814577 | GCA 015617885.1 | N/A |
| PDT000108664.1 | SAMN03359392 | SAMN03359392 | SRR1814579 | GCA 015618305.1 | N/A |
| PDT000108666.1 | SAMN03359394 | SAMN03359394 | SRR1814581 | GCA 015618225.1 | N/A |
| PDT000108682.1 | SAMN03359411 | SAMN03359411 | SRR1814598 | GCA 015616965.1 | N/A |
| PDT000108706.1 | SAMN03359435 | SAMN03359435 | SRR1814622 | GCA 015616445.1 | N/A |
| PDT000108711.1 | SAMN03359440 | SAMN03359440 | SRR1814627 | GCA 015616805.1 | N/A |
| PDT000108712.1 | SAMN03359441 | SAMN03359441 | SRR1814628 | GCA 015616785.1 | N/A |
| PDT000108714.1 | SAMN03359443 | SAMN03359443 | SRR1814630 | GCA 015616745.1 | N/A |
| PDT000108717.1 | SAMN03359446 | SAMN03359446 | SRR1814633 | GCA 015616505.1 | N/A |
| PDT000108719.1 | SAMN03359448 | SAMN03359448 | SRR1814635 | GCA 015616485.1 | N/A |
| PDT000108720.1 | SAMN03359449 | SAMN03359449 | SRR1814636 | GCA 015616545.1 | N/A |
| PDT000108723.1 | SAMN03359452 | SAMN03359452 | SRR1814639 | GCA 015616565.1 | N/A |
| PDT000108725.1 | SAMN03359454 | SAMN03359454 | SRR1814641 | GCA 015615125.1 | N/A |
| PDT000108729.1 | SAMN03359458 | SAMN03359458 | SRR1814645 | GCA 015615085.1 | N/A |
| PDT000108734.1 | SAMN03359463 | SAMN03359463 | SRR1814650 | GCA 015614845.1 | N/A |
| PDT000108736.1 | SAMN03359465 | SAMN03359465 | SRR1814652 | GCA 015614985.1 | N/A |
| PDT000108768.1 | SAMN03359497 | SAMN03359497 | SRR1814684 | GCA 015615645.1 | N/A |
| PDT000108775.1 | SAMN03359504 | SAMN03359504 | SRR1814691 | GCA 015615145.1 | N/A |
| PDT000108777.1 | SAMN03359506 | SAMN03359506 | SRR1814693 | GCA 015614085.1 | N/A |
| PDT000108778.1 | SAMN03359507 | SAMN03359507 | SRR1814694 | GCA 015613905.1 | N/A |
| PDT000108779.1 | SAMN03359508 | SAMN03359508 | SRR1814695 | GCA 015615595.1 | N/A |
| PDT000108786.1 | SAMN03359515 | SAMN03359515 | SRR1814702 | GCA 015615485.1 | N/A |
| PDT000108793.1 | SAMN03359522 | SAMN03359522 | SRR1814709 | GCA 015616225.1 | N/A |

|                |               |               |            |                 |     |
|----------------|---------------|---------------|------------|-----------------|-----|
| PDT000108800.1 | SAMN03359529  | SAMN03359529  | SRR1814716 | GCA 015616065.1 | N/A |
| PDT000108801.1 | SAMN03359530  | SAMN03359530  | SRR1814717 | GCA 015615945.1 | N/A |
| PDT000108802.1 | SAMN03359531  | SAMN03359531  | SRR1814718 | GCA 015615965.1 | N/A |
| PDT000108803.1 | SAMN03359532  | SAMN03359532  | SRR1814719 | GCA 015615865.1 | N/A |
| PDT000108805.1 | SAMN03359534  | SAMN03359534  | SRR1814721 | GCA 015616025.1 | N/A |
| PDT000108806.1 | SAMN03359535  | SAMN03359535  | SRR1814722 | GCA 015615975.1 | N/A |
| PDT000108807.1 | SAMN03359536  | SAMN03359536  | SRR1814723 | GCA 015616045.1 | N/A |
| PDT000108808.1 | SAMN03359537  | SAMN03359537  | SRR1814724 | GCA 015615925.1 | N/A |
| PDT000108809.1 | SAMN03359538  | SAMN03359538  | SRR1814725 | GCA 015615855.1 | N/A |
| PDT000108811.1 | SAMN03359540  | SAMN03359540  | SRR1814727 | GCA 015615875.1 | N/A |
| PDT000108813.1 | SAMN03359542  | SAMN03359542  | SRR1814729 | GCA 015614485.1 | N/A |
| PDT000108816.1 | SAMN03359545  | SAMN03359545  | SRR1814732 | GCA 015615795.1 | N/A |
| PDT000108819.1 | SAMN03359548  | SAMN03359548  | SRR1814735 | GCA 015614185.1 | N/A |
| PDT000108820.1 | SAMN03359549  | SAMN03359549  | SRR1814736 | GCA 015614065.1 | N/A |
| PDT000108821.1 | SAMN03359550  | SAMN03359550  | SRR1814737 | GCA 015614105.1 | N/A |
| PDT000108824.1 | SAMN03359553  | SAMN03359553  | SRR1814740 | GCA 015614035.1 | N/A |
| PDT000108825.1 | SAMN03359554  | SAMN03359554  | SRR1814741 | GCA 015614025.1 | N/A |
| PDT000108826.1 | SAMN03359555  | SAMN03359555  | SRR1814742 | GCA 015613965.1 | N/A |
| PDT000108827.1 | SAMN03359556  | SAMN03359556  | SRR1814743 | GCA 015613985.1 | N/A |
| PDT000108828.1 | SAMN03359557  | SAMN03359557  | SRR1814744 | GCA 015613925.1 | N/A |
| PDT000108830.1 | SAMN03359559  | SAMN03359559  | SRR1814746 | GCA 015613935.1 | N/A |
| PDT000108831.1 | SAMN03359560  | SAMN03359560  | SRR1814747 | GCA 015615285.1 | N/A |
| PDT000108832.1 | SAMN03359561  | SAMN03359561  | SRR1814748 | GCA 015613825.1 | N/A |
| PDT000108833.1 | SAMN03359562  | SAMN03359562  | SRR1814749 | GCA 015615425.1 | N/A |
| PDT000108836.1 | SAMN03359565  | SAMN03359565  | SRR1814752 | GCA 015613625.1 | N/A |
| PDT000108838.1 | SAMN03359567  | SAMN03359567  | SRR1814754 | GCA 015613525.1 | N/A |
| PDT000108840.1 | SAMN03359569  | SAMN03359569  | SRR1814756 | GCA 015613545.1 | N/A |
| PDT000108841.1 | SAMN03359570  | SAMN03359570  | SRR1814757 | GCA 015613445.1 | N/A |
| PDT000108843.1 | SAMN03359572  | SAMN03359572  | SRR1814759 | GCA 015613505.1 | N/A |
| PDT000108844.1 | SAMN03359573  | SAMN03359573  | SRR1814760 | GCA 015613485.1 | N/A |
| PDT000108845.1 | SAMN03359574  | SAMN03359574  | SRR1814761 | GCA 015615325.1 | N/A |
| PDT000108852.1 | SAMN03359581  | SAMN03359581  | SRR1814768 | GCA 015613465.1 | N/A |
| PDT000108854.1 | SAMN03359583  | SAMN03359583  | SRR1814770 | GCA 015615245.1 | N/A |
| PDT000108857.1 | SAMN03359586  | SAMN03359586  | SRR1814773 | GCA 015613345.1 | N/A |
| PDT000108859.1 | SAMN03359588  | SAMN03359588  | SRR1814775 | GCA 015615225.1 | N/A |
| PDT000108866.1 | SAMN03359595  | SAMN03359595  | SRR1814782 | GCA 015615165.1 | N/A |
| PDT000110911.2 | SAMEA04482515 | SAMEA04482515 | SRR3171202 | GCA 001566905.1 | N/A |
| PDT000111950.2 | SAMEA1464431  | SAMEA1464431  | ERR118438  | GCA 900044575.1 | N/A |
| PDT000111955.2 | SAMEA1317471  | SAMEA1317471  | ERR107887  | GCA 900045815.1 | N/A |
| PDT000111956.2 | SAMEA1464401  | SAMEA1464401  | ERR129258  | GCA 900035875.1 | N/A |
| PDT000111960.2 | SAMEA1464592  | SAMEA1464592  | ERR124474  | GCA 900065125.1 | N/A |
| PDT000111983.2 | SAMEA1464627  | SAMEA1464627  | ERR118516  | GCA 900040465.1 | N/A |
| PDT000111994.2 | SAMEA1317327  | SAMEA1317327  | ERR107838  | GCA 900045765.1 | N/A |
| PDT000111996.2 | SAMEA1469671  | SAMEA1469671  | ERR158801  | GCA 900045195.1 | N/A |
| PDT000112007.2 | SAMEA1469615  | SAMEA1469615  | ERR158745  | GCA 900041225.1 | N/A |
| PDT000112015.2 | SAMEA1464650  | SAMEA1464650  | ERR124456  | GCA 900060465.1 | N/A |
| PDT000112016.2 | SAMEA1464382  | SAMEA1464382  | ERR134364  | GCA 900042725.1 | N/A |
| PDT000112020.2 | SAMEA1317544  | SAMEA1317544  | ERR111128  | GCA 900042545.1 | N/A |
| PDT000112021.2 | SAMEA1464659  | SAMEA1464659  | ERR124455  | GCA 900052955.1 | N/A |
| PDT000112038.2 | SAMEA1464389  | SAMEA1464389  | ERR118499  | GCA 900040805.1 | N/A |
| PDT000112049.2 | SAMEA1469717  | SAMEA1469717  | ERR158671  | GCA 900042095.1 | N/A |
| PDT000112053.2 | SAMEA1317531  | SAMEA1317531  | ERR107787  | GCA 900044395.1 | N/A |
| PDT000112080.2 | SAMEA1469723  | SAMEA1469723  | ERR158736  | GCA 900044625.1 | N/A |
| PDT000112084.2 | SAMEA1469618  | SAMEA1469618  | ERR158687  | GCA 900040765.1 | N/A |
| PDT000112103.2 | SAMEA1469633  | SAMEA1469633  | ERR158633  | GCA 900038975.1 | N/A |
| PDT000112112.2 | SAMEA1464651  | SAMEA1464651  | ERR124529  | GCA 900044325.1 | N/A |
| PDT000112121.2 | SAMEA1464454  | SAMEA1464454  | ERR129305  | GCA 900042495.1 | N/A |
| PDT000112124.2 | SAMEA1317584  | SAMEA1317584  | ERR111107  | GCA 900041175.1 | N/A |
| PDT000112139.2 | SAMEA1464598  | SAMEA1464598  | ERR134397  | GCA 900056685.1 | N/A |
| PDT000112144.2 | SAMEA1464280  | SAMEA1464280  | ERR223140  | GCA 900040375.1 | N/A |
| PDT000112149.2 | SAMEA1317490  | SAMEA1317490  | ERR107814  | GCA 900045515.1 | N/A |
| PDT000112154.2 | SAMEA1464269  | SAMEA1464269  | ERR118333  | GCA 900019195.1 | N/A |
| PDT000112158.2 | SAMEA1464219  | SAMEA1464219  | ERR118526  | GCA 900043955.1 | N/A |
| PDT000112162.2 | SAMEA1317457  | SAMEA1317457  | ERR107963  | GCA 900048735.1 | N/A |
| PDT000112175.2 | SAMEA1464405  | SAMEA1464405  | ERR118431  | GCA 900039105.1 | N/A |
| PDT000112179.2 | SAMEA1464406  | SAMEA1464406  | ERR118439  | GCA 900039845.1 | N/A |
| PDT000112199.2 | SAMEA1317354  | SAMEA1317354  | ERR111075  | GCA 900041105.1 | N/A |
| PDT000112219.2 | SAMEA1464396  | SAMEA1464396  | ERR118432  | GCA 900040335.1 | N/A |

|                |              |              |           |                 |     |
|----------------|--------------|--------------|-----------|-----------------|-----|
| PDT000112221.2 | SAMEA1464594 | SAMEA1464594 | ERR134348 | GCA 900045995.1 | N/A |
| PDT000112229.2 | SAMEA1464477 | SAMEA1464477 | ERR118441 | GCA 900046015.1 | N/A |
| PDT000112231.2 | SAMEA1317543 | SAMEA1317543 | ERR111110 | GCA 900046325.1 | N/A |
| PDT000112237.2 | SAMEA1464464 | SAMEA1464464 | ERR129332 | GCA 900038895.1 | N/A |
| PDT000112242.2 | SAMEA1317574 | SAMEA1317574 | ERR111064 | GCA 900041075.1 | N/A |
| PDT000112244.2 | SAMEA1464183 | SAMEA1464183 | ERR129303 | GCA 900037655.1 | N/A |
| PDT000112248.2 | SAMEA1464713 | SAMEA1464713 | ERR118486 | GCA 900041035.1 | N/A |
| PDT000112253.2 | SAMEA1464714 | SAMEA1464714 | ERR134374 | GCA 900045225.1 | N/A |
| PDT000112260.2 | SAMEA1464719 | SAMEA1464719 | ERR118490 | GCA 900020455.1 | N/A |
| PDT000112266.2 | SAMEA1317422 | SAMEA1317422 | ERR107961 | GCA 900037795.1 | N/A |
| PDT000112281.2 | SAMEA1464519 | SAMEA1464519 | ERR118393 | GCA 900040265.1 | N/A |
| PDT000112288.2 | SAMEA1317546 | SAMEA1317546 | ERR111080 | GCA 900040545.1 | N/A |
| PDT000112289.2 | SAMEA1464175 | SAMEA1464175 | ERR124444 | GCA 900037755.1 | N/A |
| PDT000112292.2 | SAMEA1464450 | SAMEA1464450 | ERR129277 | GCA 900017525.1 | N/A |
| PDT000112293.2 | SAMEA1464235 | SAMEA1464235 | ERR118448 | GCA 900039155.1 | N/A |
| PDT000112298.2 | SAMEA1464204 | SAMEA1464204 | ERR129307 | GCA 900044505.1 | N/A |
| PDT000112306.2 | SAMEA1464255 | SAMEA1464255 | ERR118376 | GCA 900038555.1 | N/A |
| PDT000112307.2 | SAMEA1464668 | SAMEA1464668 | ERR118360 | GCA 900042045.1 | N/A |
| PDT000112308.2 | SAMEA1317521 | SAMEA1317521 | ERR107805 | GCA 900044445.1 | N/A |
| PDT000112312.2 | SAMEA1464591 | SAMEA1464591 | ERR118570 | GCA 900040835.1 | N/A |
| PDT000112315.2 | SAMEA1469638 | SAMEA1469638 | ERR158698 | GCA 900018245.1 | N/A |
| PDT000112317.2 | SAMEA1317474 | SAMEA1317474 | ERR111124 | GCA 900046385.1 | N/A |
| PDT000115487.2 | SAMEA1929646 | SAMEA1929646 | ERR387256 | GCA 900070245.1 | N/A |
| PDT000115492.2 | SAMEA1469542 | SAMEA1469542 | ERR158794 | GCA 900064455.1 | N/A |
| PDT000115493.2 | SAMEA1464238 | SAMEA1464238 | ERR134371 | GCA 900017705.1 | N/A |
| PDT000115509.2 | SAMEA1464542 | SAMEA1464542 | ERR134412 | GCA 900051765.1 | N/A |
| PDT000115512.2 | SAMEA1317317 | SAMEA1317317 | ERR107953 | GCA 900040915.1 | N/A |
| PDT000115513.2 | SAMEA1464566 | SAMEA1464566 | ERR124457 | GCA 900043565.1 | N/A |
| PDT000115515.2 | SAMEA1317461 | SAMEA1317461 | ERR107791 | GCA 900043945.1 | N/A |
| PDT000115520.2 | SAMEA1469612 | SAMEA1469612 | ERR158685 | GCA 900040155.1 | N/A |
| PDT000115523.2 | SAMEA1317487 | SAMEA1317487 | ERR107790 | GCA 900045595.1 | N/A |
| PDT000115524.2 | SAMEA1469582 | SAMEA1469582 | ERR158788 | GCA 900061125.1 | N/A |
| PDT000115528.2 | SAMEA1317590 | SAMEA1317590 | ERR107965 | GCA 900047135.1 | N/A |
| PDT000115549.2 | SAMEA1464336 | SAMEA1464336 | ERR223134 | GCA 900062765.1 | N/A |
| PDT000115558.2 | SAMEA1317498 | SAMEA1317498 | ERR107804 | GCA 900035675.1 | N/A |
| PDT000115572.2 | SAMEA1464470 | SAMEA1464470 | ERR134352 | GCA 900039855.1 | N/A |
| PDT000115589.2 | SAMEA1464385 | SAMEA1464385 | ERR129285 | GCA 900047355.1 | N/A |
| PDT000115591.2 | SAMEA1464536 | SAMEA1464536 | ERR134382 | GCA 900060225.1 | N/A |
| PDT000115594.2 | SAMEA1464702 | SAMEA1464702 | ERR118488 | GCA 900041815.1 | N/A |
| PDT000115602.2 | SAMEA1317589 | SAMEA1317589 | ERR107901 | GCA 900038365.1 | N/A |
| PDT000115608.2 | SAMEA1469578 | SAMEA1469578 | ERR158785 | GCA 900061115.1 | N/A |
| PDT000115610.2 | SAMEA1464637 | SAMEA1464637 | ERR134393 | GCA 900064535.1 | N/A |
| PDT000115611.2 | SAMEA1464580 | SAMEA1464580 | ERR134411 | GCA 900035595.1 | N/A |
| PDT000115618.2 | SAMEA1317384 | SAMEA1317384 | ERR107823 | GCA 900044375.1 | N/A |
| PDT000115629.2 | SAMEA1464499 | SAMEA1464499 | ERR129334 | GCA 900037725.1 | N/A |
| PDT000115635.2 | SAMEA1469702 | SAMEA1469702 | ERR158692 | GCA 900048765.1 | N/A |
| PDT000115637.2 | SAMEA1469639 | SAMEA1469639 | ERR223144 | GCA 900059255.1 | N/A |
| PDT000115657.2 | SAMEA1464260 | SAMEA1464260 | ERR118394 | GCA 900044535.1 | N/A |
| PDT000115672.2 | SAMEA1464653 | SAMEA1464653 | ERR124485 | GCA 900048975.1 | N/A |
| PDT000115682.2 | SAMEA1469616 | SAMEA1469616 | ERR158635 | GCA 900042075.1 | N/A |
| PDT000115695.2 | SAMEA1464469 | SAMEA1464469 | ERR134343 | GCA 900017565.1 | N/A |
| PDT000115701.2 | SAMEA1464557 | SAMEA1464557 | ERR118395 | GCA 900040275.1 | N/A |
| PDT000115702.2 | SAMEA1317411 | SAMEA1317411 | ERR107962 | GCA 900041985.1 | N/A |
| PDT000115718.2 | SAMEA1464569 | SAMEA1464569 | ERR124493 | GCA 900043625.1 | N/A |
| PDT000115719.2 | SAMEA1317435 | SAMEA1317435 | ERR111057 | GCA 900046185.1 | N/A |
| PDT000115726.2 | SAMEA1464478 | SAMEA1464478 | ERR118463 | GCA 900045145.1 | N/A |
| PDT000115733.2 | SAMEA1317444 | SAMEA1317444 | ERR107816 | GCA 900035645.1 | N/A |
| PDT000115738.2 | SAMEA1317491 | SAMEA1317491 | ERR107848 | GCA 900035775.1 | N/A |
| PDT000115754.2 | SAMEA1464210 | SAMEA1464210 | ERR118331 | GCA 900039715.1 | N/A |
| PDT000115779.2 | SAMEA1464535 | SAMEA1464535 | ERR129310 | GCA 900037665.1 | N/A |
| PDT000115805.2 | SAMEA1317582 | SAMEA1317582 | ERR107874 | GCA 900047175.1 | N/A |
| PDT000115809.2 | SAMEA1464674 | SAMEA1464674 | ERR134396 | GCA 900055265.1 | N/A |
| PDT000115815.2 | SAMEA1464577 | SAMEA1464577 | ERR129276 | GCA 900038405.1 | N/A |
| PDT000115823.2 | SAMEA1464250 | SAMEA1464250 | ERR118558 | GCA 900037685.1 | N/A |
| PDT000115825.2 | SAMEA1469660 | SAMEA1469660 | ERR158686 | GCA 900040965.1 | N/A |
| PDT000115830.2 | SAMEA1464287 | SAMEA1464287 | ERR129263 | GCA 900035885.1 | N/A |
| PDT000115833.2 | SAMEA1464251 | SAMEA1464251 | ERR129292 | GCA 900048535.1 | N/A |
| PDT000115844.2 | SAMEA1464423 | SAMEA1464423 | ERR124515 | GCA 900052355.1 | N/A |

|                |              |              |           |                 |     |
|----------------|--------------|--------------|-----------|-----------------|-----|
| PDT000115855.2 | SAMEA1317528 | SAMEA1317528 | ERR107967 | GCA 900038935.1 | N/A |
| PDT000115858.2 | SAMEA1464496 | SAMEA1464496 | ERR124519 | GCA 900053935.1 | N/A |
| PDT000115864.2 | SAMEA1464611 | SAMEA1464611 | ERR118535 | GCA 900045585.1 | N/A |
| PDT000115879.2 | SAMEA1317449 | SAMEA1317449 | ERR107835 | GCA 900018725.1 | N/A |
| PDT000115880.2 | SAMEA1464617 | SAMEA1464617 | ERR118515 | GCA 900046095.1 | N/A |
| PDT000115884.2 | SAMEA1464330 | SAMEA1464330 | ERR118399 | GCA 900052655.1 | N/A |
| PDT000115887.2 | SAMEA1317335 | SAMEA1317335 | ERR111103 | GCA 900040575.1 | N/A |
| PDT000115897.2 | SAMEA1464245 | SAMEA1464245 | ERR134358 | GCA 900041085.1 | N/A |
| PDT000115906.2 | SAMEA1317431 | SAMEA1317431 | ERR107927 | GCA 900044475.1 | N/A |
| PDT000115907.2 | SAMEA1317548 | SAMEA1317548 | ERR107860 | GCA 900045785.1 | N/A |
| PDT000115913.2 | SAMEA1464587 | SAMEA1464587 | ERR124472 | GCA 900063345.1 | N/A |
| PDT000115932.2 | SAMEA1464712 | SAMEA1464712 | ERR129296 | GCA 900035935.1 | N/A |
| PDT000115934.2 | SAMEA1464533 | SAMEA1464533 | ERR124506 | GCA 900062125.1 | N/A |
| PDT000115935.2 | SAMEA1469579 | SAMEA1469579 | ERR158693 | GCA 900018235.1 | N/A |
| PDT000115938.2 | SAMEA1464534 | SAMEA1464534 | ERR118423 | GCA 900041005.1 | N/A |
| PDT000115949.2 | SAMEA1317397 | SAMEA1317397 | ERR111129 | GCA 900056315.1 | N/A |
| PDT000115959.2 | SAMEA1464299 | SAMEA1464299 | ERR134340 | GCA 900039685.1 | N/A |
| PDT000115970.2 | SAMEA1464654 | SAMEA1464654 | ERR118539 | GCA 900019065.1 | N/A |
| PDT000115977.2 | SAMEA1469552 | SAMEA1469552 | ERR158806 | GCA 900049325.1 | N/A |
| PDT000115985.2 | SAMEA1464620 | SAMEA1464620 | ERR134380 | GCA 900045255.1 | N/A |
| PDT000115990.2 | SAMEA1464346 | SAMEA1464346 | ERR134406 | GCA 900055275.1 | N/A |
| PDT000116013.2 | SAMEA1464704 | SAMEA1464704 | ERR223146 | GCA 900045245.1 | N/A |
| PDT000116039.2 | SAMEA1464273 | SAMEA1464273 | ERR129286 | GCA 900019165.1 | N/A |
| PDT000116043.2 | SAMEA1464642 | SAMEA1464642 | ERR118538 | GCA 900044355.1 | N/A |
| PDT000116049.2 | SAMEA1464380 | SAMEA1464380 | ERR118408 | GCA 900048775.1 | N/A |
| PDT000116060.2 | SAMEA1317436 | SAMEA1317436 | ERR111118 | GCA 900046355.1 | N/A |
| PDT000116071.2 | SAMEA1464195 | SAMEA1464195 | ERR134341 | GCA 900045975.1 | N/A |
| PDT000116080.2 | SAMEA1317587 | SAMEA1317587 | ERR111040 | GCA 900040475.1 | N/A |
| PDT000116095.2 | SAMEA1317502 | SAMEA1317502 | ERR107833 | GCA 900045755.1 | N/A |
| PDT000116096.2 | SAMEA1317325 | SAMEA1317325 | ERR111115 | GCA 900040605.1 | N/A |
| PDT000116102.2 | SAMEA1464701 | SAMEA1464701 | ERR134360 | GCA 900046305.1 | N/A |
| PDT000116105.2 | SAMEA1317385 | SAMEA1317385 | ERR107885 | GCA 900020265.1 | N/A |
| PDT000116106.2 | SAMEA1317322 | SAMEA1317322 | ERR107954 | GCA 900048715.1 | N/A |
| PDT000116107.2 | SAMEA1317513 | SAMEA1317513 | ERR107968 | GCA 900046865.1 | N/A |
| PDT000116108.2 | SAMEA1464353 | SAMEA1464353 | ERR124463 | GCA 900058385.1 | N/A |
| PDT000116126.2 | SAMEA1317362 | SAMEA1317362 | ERR107873 | GCA 900048495.1 | N/A |
| PDT000116147.2 | SAMEA1464439 | SAMEA1464439 | ERR129280 | GCA 900040395.1 | N/A |
| PDT000116148.2 | SAMEA1464667 | SAMEA1464667 | ERR118525 | GCA 900060475.1 | N/A |
| PDT000116150.2 | SAMEA1464213 | SAMEA1464213 | ERR118580 | GCA 900045685.1 | N/A |
| PDT000116161.2 | SAMEA1317390 | SAMEA1317390 | ERR111121 | GCA 900046375.1 | N/A |
| PDT000116165.2 | SAMEA1929648 | SAMEA1929648 | ERR387257 | GCA 900070285.1 | N/A |
| PDT000116169.2 | SAMEA1464681 | SAMEA1464681 | ERR118560 | GCA 900045645.1 | N/A |
| PDT000116183.2 | SAMEA1464683 | SAMEA1464683 | ERR134395 | GCA 900049765.1 | N/A |
| PDT000116213.2 | SAMEA1464230 | SAMEA1464230 | ERR118356 | GCA 900059555.1 | N/A |
| PDT000116214.2 | SAMEA1464610 | SAMEA1464610 | ERR118362 | GCA 900018055.1 | N/A |
| PDT000116235.2 | SAMEA1469681 | SAMEA1469681 | ERR158627 | GCA 900045045.1 | N/A |
| PDT000116238.2 | SAMEA1464442 | SAMEA1464442 | ERR118478 | GCA 900040445.1 | N/A |
| PDT000116248.2 | SAMEA1469650 | SAMEA1469650 | ERR158767 | GCA 900057805.1 | N/A |
| PDT000116262.2 | SAMEA1464699 | SAMEA1464699 | ERR118608 | GCA 900018705.1 | N/A |
| PDT000116263.2 | SAMEA1464173 | SAMEA1464173 | ERR124508 | GCA 900050655.1 | N/A |
| PDT000116280.2 | SAMEA1317538 | SAMEA1317538 | ERR107811 | GCA 900035665.1 | N/A |
| PDT000116286.2 | SAMEA1469603 | SAMEA1469603 | ERR158623 | GCA 900022625.1 | N/A |
| PDT000116292.2 | SAMEA1317404 | SAMEA1317404 | ERR107960 | GCA 900037785.1 | N/A |
| PDT000116293.2 | SAMEA1464191 | SAMEA1464191 | ERR124499 | GCA 900051385.1 | N/A |
| PDT000116294.2 | SAMEA1464606 | SAMEA1464606 | ERR124479 | GCA 900055645.1 | N/A |
| PDT000116299.2 | SAMEA1469593 | SAMEA1469593 | ERR158694 | GCA 900039015.1 | N/A |
| PDT000116304.2 | SAMEA1317501 | SAMEA1317501 | ERR107933 | GCA 900041955.1 | N/A |
| PDT000116308.2 | SAMEA1464264 | SAMEA1464264 | ERR118578 | GCA 900042475.1 | N/A |
| PDT000116309.2 | SAMEA1464343 | SAMEA1464343 | ERR134405 | GCA 900057335.1 | N/A |
| PDT000116317.2 | SAMEA1464546 | SAMEA1464546 | ERR134357 | GCA 900056305.1 | N/A |
| PDT000116319.2 | SAMEA1317324 | SAMEA1317324 | ERR111038 | GCA 900046105.1 | N/A |
| PDT000116321.2 | SAMEA1464377 | SAMEA1464377 | ERR124516 | GCA 900054175.1 | N/A |
| PDT000116352.2 | SAMEA1317321 | SAMEA1317321 | ERR111130 | GCA 900042555.1 | N/A |
| PDT000116363.2 | SAMEA1317355 | SAMEA1317355 | ERR107841 | GCA 900038335.1 | N/A |
| PDT000116367.2 | SAMEA1469628 | SAMEA1469628 | ERR158721 | GCA 900042595.1 | N/A |
| PDT000116385.2 | SAMEA1464663 | SAMEA1464663 | ERR223148 | GCA 900063315.1 | N/A |
| PDT000116387.2 | SAMEA1464433 | SAMEA1464433 | ERR118547 | GCA 900045635.1 | N/A |
| PDT000116392.2 | SAMEA1464418 | SAMEA1464418 | ERR134350 | GCA 900039125.1 | N/A |

|                |              |              |           |                 |     |
|----------------|--------------|--------------|-----------|-----------------|-----|
| PDT000116394.2 | SAMEA1317493 | SAMEA1317493 | ERR107971 | GCA 900041995.1 | N/A |
| PDT000116399.2 | SAMEA1317492 | SAMEA1317492 | ERR107813 | GCA 900045545.1 | N/A |
| PDT000116409.2 | SAMEA1464700 | SAMEA1464700 | ERR129299 | GCA 900037645.1 | N/A |
| PDT000116421.2 | SAMEA1317517 | SAMEA1317517 | ERR111051 | GCA 900056295.1 | N/A |
| PDT000116428.2 | SAMEA1464582 | SAMEA1464582 | ERR118359 | GCA 900038545.1 | N/A |
| PDT000116441.2 | SAMEA1469629 | SAMEA1469629 | ERR158770 | GCA 900051065.1 | N/A |
| PDT000116442.2 | SAMEA1469672 | SAMEA1469672 | ERR158649 | GCA 900037945.1 | N/A |
| PDT000116445.2 | SAMEA1568642 | SAMEA1568642 | ERR211891 | GCA 900036925.1 | N/A |
| PDT000116460.2 | SAMEA1464350 | SAMEA1464350 | ERR118454 | GCA 900042235.1 | N/A |
| PDT000116467.2 | SAMEA1469622 | SAMEA1469622 | ERR158779 | GCA 900061105.1 | N/A |
| PDT000116469.2 | SAMEA1317430 | SAMEA1317430 | ERR111067 | GCA 900056975.1 | N/A |
| PDT000116470.2 | SAMEA1464677 | SAMEA1464677 | ERR118357 | GCA 900020475.1 | N/A |
| PDT000116475.2 | SAMEA1464314 | SAMEA1464314 | ERR118613 | GCA 900045945.1 | N/A |
| PDT000116476.2 | SAMEA1469585 | SAMEA1469585 | ERR158787 | GCA 900048385.1 | N/A |
| PDT000116487.2 | SAMEA1464578 | SAMEA1464578 | ERR124476 | GCA 900049775.1 | N/A |
| PDT000116488.2 | SAMEA1464180 | SAMEA1464180 | ERR118381 | GCA 900040225.1 | N/A |
| PDT000116495.2 | SAMEA1317323 | SAMEA1317323 | ERR107799 | GCA 900044385.1 | N/A |
| PDT000116496.2 | SAMEA1464696 | SAMEA1464696 | ERR124437 | GCA 900017495.1 | N/A |
| PDT000116505.2 | SAMEA1317377 | SAMEA1317377 | ERR107957 | GCA 900020345.1 | N/A |
| PDT000116515.2 | SAMEA1469673 | SAMEA1469673 | ERR158802 | GCA 900017655.1 | N/A |
| PDT000116517.2 | SAMEA1464351 | SAMEA1464351 | ERR118604 | GCA 900057305.1 | N/A |
| PDT000116535.2 | SAMEA1464311 | SAMEA1464311 | ERR124492 | GCA 900056955.1 | N/A |
| PDT000116537.2 | SAMEA1317568 | SAMEA1317568 | ERR111108 | GCA 900040595.1 | N/A |
| PDT000116544.2 | SAMEA1464621 | SAMEA1464621 | ERR118364 | GCA 900018075.1 | N/A |
| PDT000116547.2 | SAMEA1464358 | SAMEA1464358 | ERR118391 | GCA 900018275.1 | N/A |
| PDT000116550.2 | SAMEA1317458 | SAMEA1317458 | ERR107857 | GCA 900022575.1 | N/A |
| PDT000116551.2 | SAMEA1464623 | SAMEA1464623 | ERR118465 | GCA 900039905.1 | N/A |
| PDT000116571.2 | SAMEA2298602 | SAMEA2298602 | ERR494744 | GCA 900070275.1 | N/A |
| PDT000116580.2 | SAMEA1464341 | SAMEA1464341 | ERR134403 | GCA 900064225.1 | N/A |
| PDT000116585.2 | SAMEA1464224 | SAMEA1464224 | ERR118400 | GCA 900039795.1 | N/A |
| PDT000116591.2 | SAMEA1464279 | SAMEA1464279 | ERR124462 | GCA 900051785.1 | N/A |
| PDT000116596.2 | SAMEA1317475 | SAMEA1317475 | ERR107808 | GCA 900043915.1 | N/A |
| PDT000116608.2 | SAMEA1469712 | SAMEA1469712 | ERR158746 | GCA 900049805.1 | N/A |
| PDT000116622.2 | SAMEA1464554 | SAMEA1464554 | ERR134394 | GCA 900043555.1 | N/A |
| PDT000116634.2 | SAMEA1464479 | SAMEA1464479 | ERR118341 | GCA 900017975.1 | N/A |
| PDT000116636.2 | SAMEA1469690 | SAMEA1469690 | ERR158730 | GCA 900044595.1 | N/A |
| PDT000116643.2 | SAMEA1464259 | SAMEA1464259 | ERR118334 | GCA 900020355.1 | N/A |
| PDT000116645.2 | SAMEA1464679 | SAMEA1464679 | ERR129300 | GCA 900047395.1 | N/A |
| PDT000116655.2 | SAMEA1469642 | SAMEA1469642 | ERR158705 | GCA 900042145.1 | N/A |
| PDT000116660.2 | SAMEA1317519 | SAMEA1317519 | ERR107920 | GCA 900020215.1 | N/A |
| PDT000116670.2 | SAMEA1464529 | SAMEA1464529 | ERR223147 | GCA 900058915.1 | N/A |
| PDT000116675.2 | SAMEA1568610 | SAMEA1568610 | ERR211900 | GCA 900036945.1 | N/A |
| PDT000116677.2 | SAMEA1464345 | SAMEA1464345 | ERR134368 | GCA 900017685.1 | N/A |
| PDT000116688.2 | SAMEA1929514 | SAMEA1929514 | ERR387096 | GCA 900070255.1 | N/A |
| PDT000116689.2 | SAMEA1317388 | SAMEA1317388 | ERR107795 | GCA 900035685.1 | N/A |
| PDT000116691.2 | SAMEA1464265 | SAMEA1464265 | ERR118474 | GCA 900040785.1 | N/A |
| PDT000116695.2 | SAMEA1469682 | SAMEA1469682 | ERR158798 | GCA 900017645.1 | N/A |
| PDT000116708.2 | SAMEA1317395 | SAMEA1317395 | ERR107958 | GCA 900048725.1 | N/A |
| PDT000116741.2 | SAMEA1464468 | SAMEA1464468 | ERR118480 | GCA 900048185.1 | N/A |
| PDT000116746.2 | SAMEA1317313 | SAMEA1317313 | ERR111113 | GCA 900041185.1 | N/A |
| PDT000116750.2 | SAMEA1317424 | SAMEA1317424 | ERR111070 | GCA 900050285.1 | N/A |
| PDT000116774.2 | SAMEA1464237 | SAMEA1464237 | ERR118466 | GCA 900058885.1 | N/A |
| PDT000116775.2 | SAMEA1317369 | SAMEA1317369 | ERR107944 | GCA 900040895.1 | N/A |
| PDT000116789.2 | SAMEA1464541 | SAMEA1464541 | ERR124470 | GCA 900061095.1 | N/A |
| PDT000116796.2 | SAMEA1464420 | SAMEA1464420 | ERR124512 | GCA 900050615.1 | N/A |
| PDT000116802.2 | SAMEA1317442 | SAMEA1317442 | ERR111120 | GCA 900055295.1 | N/A |
| PDT000116813.2 | SAMEA1317523 | SAMEA1317523 | ERR107890 | GCA 900018735.1 | N/A |
| PDT000116814.2 | SAMEA1464661 | SAMEA1464661 | ERR129321 | GCA 900044955.1 | N/A |
| PDT000116823.2 | SAMEA1464339 | SAMEA1464339 | ERR134365 | GCA 900017675.1 | N/A |
| PDT000116825.2 | SAMEA1469623 | SAMEA1469623 | ERR158633 | GCA 900037895.1 | N/A |
| PDT000116829.2 | SAMEA1317579 | SAMEA1317579 | ERR107915 | GCA 900042485.1 | N/A |
| PDT000116830.2 | SAMEA1317358 | SAMEA1317358 | ERR107798 | GCA 900019105.1 | N/A |
| PDT000116831.2 | SAMEA1464488 | SAMEA1464488 | ERR118460 | GCA 900045135.1 | N/A |
| PDT000116839.2 | SAMEA1469662 | SAMEA1469662 | ERR158781 | GCA 900048345.1 | N/A |
| PDT000116840.2 | SAMEA1317500 | SAMEA1317500 | ERR111066 | GCA 900040505.1 | N/A |
| PDT000116841.2 | SAMEA1464290 | SAMEA1464290 | ERR124448 | GCA 900046315.1 | N/A |
| PDT000116843.2 | SAMEA1317464 | SAMEA1317464 | ERR111117 | GCA 900053485.1 | N/A |
| PDT000116845.2 | SAMEA1464427 | SAMEA1464427 | ERR118427 | GCA 900064045.1 | N/A |



|                |              |              |           |                 |     |
|----------------|--------------|--------------|-----------|-----------------|-----|
| PDT000116848.2 | SAMEA1464465 | SAMEA1464465 | ERR129291 | GCA 900047375.1 | N/A |
| PDT000116850.2 | SAMEA1469586 | SAMEA1469586 | ERR158653 | GCA 900040955.1 | N/A |
| PDT000116853.2 | SAMEA1317482 | SAMEA1317482 | ERR107945 | GCA 900048665.1 | N/A |
| PDT000116854.2 | SAMEA1469715 | SAMEA1469715 | ERR158771 | GCA 900048285.1 | N/A |
| PDT000116860.2 | SAMEA1464357 | SAMEA1464357 | ERR118567 | GCA 900044965.1 | N/A |
| PDT000116871.2 | SAMEA1469568 | SAMEA1469568 | ERR158741 | GCA 900042645.1 | N/A |
| PDT000116888.2 | SAMEA1317511 | SAMEA1317511 | ERR111079 | GCA 900060495.1 | N/A |
| PDT000116893.2 | SAMEA1464392 | SAMEA1464392 | ERR124439 | GCA 900035835.1 | N/A |
| PDT000116895.2 | SAMEA1464480 | SAMEA1464480 | ERR129259 | GCA 900019145.1 | N/A |
| PDT000116896.2 | SAMEA1464190 | SAMEA1464190 | ERR124509 | GCA 900050605.1 | N/A |
| PDT000116907.2 | SAMEA1464337 | SAMEA1464337 | ERR118550 | GCA 900038205.1 | N/A |
| PDT000116912.2 | SAMEA1464485 | SAMEA1464485 | ERR124501 | GCA 900050595.1 | N/A |
| PDT000116915.2 | SAMEA1317415 | SAMEA1317415 | ERR107853 | GCA 900035805.1 | N/A |
| PDT000116921.2 | SAMEA1464493 | SAMEA1464493 | ERR118469 | GCA 900041015.1 | N/A |
| PDT000116927.2 | SAMEA1464278 | SAMEA1464278 | ERR129301 | GCA 900048545.1 | N/A |
| PDT000116930.2 | SAMEA1464687 | SAMEA1464687 | ERR118351 | GCA 900042035.1 | N/A |
| PDT000116934.2 | SAMEA1317407 | SAMEA1317407 | ERR107803 | GCA 900047455.1 | N/A |
| PDT000116944.2 | SAMEA1464229 | SAMEA1464229 | ERR118527 | GCA 900045495.1 | N/A |
| PDT000116978.2 | SAMEA1464545 | SAMEA1464545 | ERR124487 | GCA 900058635.1 | N/A |
| PDT000116980.2 | SAMEA1464445 | SAMEA1464445 | ERR118576 | GCA 900038845.1 | N/A |
| PDT000116988.2 | SAMEA1464181 | SAMEA1464181 | ERR118529 | GCA 900044345.1 | N/A |
| PDT000116999.2 | SAMEA1469653 | SAMEA1469653 | ERR158780 | GCA 900048335.1 | N/A |
| PDT000117019.2 | SAMEA1464369 | SAMEA1464369 | ERR118508 | GCA 900042305.1 | N/A |
| PDT000117021.2 | SAMEA1317421 | SAMEA1317421 | ERR111084 | GCA 900041125.1 | N/A |
| PDT000117024.2 | SAMEA1464613 | SAMEA1464613 | ERR134381 | GCA 900045275.1 | N/A |
| PDT000117025.2 | SAMEA1464344 | SAMEA1464344 | ERR124442 | GCA 900044925.1 | N/A |
| PDT000117037.2 | SAMEA1464576 | SAMEA1464576 | ERR118520 | GCA 900019035.1 | N/A |
| PDT000117049.2 | SAMEA1317476 | SAMEA1317476 | ERR107964 | GCA 900045015.1 | N/A |
| PDT000117052.2 | SAMEA1464657 | SAMEA1464657 | ERR129331 | GCA 900041945.1 | N/A |
| PDT000117054.2 | SAMEA1469605 | SAMEA1469605 | ERR158663 | GCA 900040145.1 | N/A |
| PDT000117067.2 | SAMEA1464481 | SAMEA1464481 | ERR124521 | GCA 900056265.1 | N/A |
| PDT000117074.2 | SAMEA1464672 | SAMEA1464672 | ERR118445 | GCA 900040345.1 | N/A |
| PDT000117075.2 | SAMEA1317518 | SAMEA1317518 | ERR111049 | GCA 900046155.1 | N/A |
| PDT000117081.2 | SAMEA1317576 | SAMEA1317576 | ERR107929 | GCA 900048625.1 | N/A |
| PDT000117083.2 | SAMEA1464325 | SAMEA1464325 | ERR134347 | GCA 900049395.1 | N/A |
| PDT000117085.2 | SAMEA1464715 | SAMEA1464715 | ERR134398 | GCA 900053925.1 | N/A |
| PDT000117108.2 | SAMEA1469591 | SAMEA1469591 | ERR158786 | GCA 900048375.1 | N/A |
| PDT000117110.2 | SAMEA1464246 | SAMEA1464246 | ERR124486 | GCA 900055945.1 | N/A |
| PDT000117112.2 | SAMEA1469670 | SAMEA1469670 | ERR158777 | GCA 900045175.1 | N/A |
| PDT000117122.2 | SAMEA1464660 | SAMEA1464660 | ERR118492 | GCA 900051815.1 | N/A |
| PDT000117136.2 | SAMEA1464253 | SAMEA1464253 | ERR118386 | GCA 900045125.1 | N/A |
| PDT000117137.2 | SAMEA1317569 | SAMEA1317569 | ERR107900 | GCA 900038355.1 | N/A |
| PDT000117140.2 | SAMEA1464692 | SAMEA1464692 | ERR134402 | GCA 900064215.1 | N/A |
| PDT000117144.2 | SAMEA1464688 | SAMEA1464688 | ERR129317 | GCA 900048585.1 | N/A |
| PDT000117145.2 | SAMEA1469695 | SAMEA1469695 | ERR158755 | GCA 900055305.1 | N/A |
| PDT000117146.2 | SAMEA1464599 | SAMEA1464599 | ERR118491 | GCA 900041825.1 | N/A |
| PDT000117150.2 | SAMEA1317558 | SAMEA1317558 | ERR111094 | GCA 900062805.1 | N/A |
| PDT000117157.2 | SAMEA1464360 | SAMEA1464360 | ERR118390 | GCA 900040245.1 | N/A |
| PDT000117161.2 | SAMEA1464574 | SAMEA1464574 | ERR124469 | GCA 900062905.1 | N/A |
| PDT000117162.2 | SAMEA1464223 | SAMEA1464223 | ERR118554 | GCA 900035695.1 | N/A |
| PDT000117171.2 | SAMEA1464532 | SAMEA1464532 | ERR124471 | GCA 900063305.1 | N/A |
| PDT000117179.2 | SAMEA1464440 | SAMEA1464440 | ERR129274 | GCA 900017515.1 | N/A |
| PDT000117188.2 | SAMEA1469536 | SAMEA1469536 | ERR158640 | GCA 900037925.1 | N/A |
| PDT000117194.2 | SAMEA1317494 | SAMEA1317494 | ERR111050 | GCA 900046165.1 | N/A |
| PDT000117209.2 | SAMEA1464698 | SAMEA1464698 | ERR118559 | GCA 900035715.1 | N/A |
| PDT000117214.2 | SAMEA1464518 | SAMEA1464518 | ERR129272 | GCA 900035895.1 | N/A |
| PDT000117226.2 | SAMEA1464321 | SAMEA1464321 | ERR124451 | GCA 900058375.1 | N/A |
| PDT000117232.2 | SAMEA1317396 | SAMEA1317396 | ERR111069 | GCA 900040515.1 | N/A |
| PDT000117240.2 | SAMEA1469602 | SAMEA1469602 | ERR158763 | GCA 900048235.1 | N/A |
| PDT000117242.2 | SAMEA1464515 | SAMEA1464515 | ERR129312 | GCA 900047425.1 | N/A |
| PDT000117244.2 | SAMEA1464685 | SAMEA1464685 | ERR118485 | GCA 900040385.1 | N/A |
| PDT000117249.2 | SAMEA1469600 | SAMEA1469600 | ERR158681 | GCA 900018205.1 | N/A |
| PDT000117252.2 | SAMEA1317516 | SAMEA1317516 | ERR107849 | GCA 900038865.1 | N/A |
| PDT000117256.2 | SAMEA1469710 | SAMEA1469710 | ERR158677 | GCA 900042105.1 | N/A |
| PDT000117266.2 | SAMEA1469625 | SAMEA1469625 | ERR158776 | GCA 900059265.1 | N/A |
| PDT000117269.2 | SAMEA1929516 | SAMEA1929516 | ERR387195 | GCA 900070295.1 | N/A |
| PDT000117271.2 | SAMEA1464520 | SAMEA1464520 | ERR124504 | GCA 900060215.1 | N/A |
| PDT000117273.2 | SAMEA1464549 | SAMEA1464549 | ERR118595 | GCA 900046035.1 | N/A |

|                |              |              |           |                 |     |
|----------------|--------------|--------------|-----------|-----------------|-----|
| PDT000117289.2 | SAMEA1464489 | SAMEA1464489 | ERR118416 | GCA 900039075.1 | N/A |
| PDT000117291.2 | SAMEA1317410 | SAMEA1317410 | ERR223131 | GCA 900035865.1 | N/A |
| PDT000117297.2 | SAMEA1568613 | SAMEA1568613 | ERR211897 | GCA 900036935.1 | N/A |
| PDT000117300.2 | SAMEA1464473 | SAMEA1464473 | ERR118566 | GCA 900045665.1 | N/A |
| PDT000117301.2 | SAMEA1469634 | SAMEA1469634 | ERR158724 | GCA 900042615.1 | N/A |
| PDT000117307.2 | SAMEA1464455 | SAMEA1464455 | ERR118440 | GCA 900039135.1 | N/A |
| PDT000117312.2 | SAMEA1317550 | SAMEA1317550 | ERR107966 | GCA 900048745.1 | N/A |
| PDT000117317.2 | SAMEA1464319 | SAMEA1464319 | ERR118572 | GCA 900038275.1 | N/A |
| PDT000117364.2 | SAMEA1464624 | SAMEA1464624 | ERR129266 | GCA 900046845.1 | N/A |
| PDT000117367.2 | SAMEA1317368 | SAMEA1317368 | ERR111054 | GCA 900022675.1 | N/A |
| PDT000117374.2 | SAMEA1464292 | SAMEA1464292 | ERR118522 | GCA 900047485.1 | N/A |
| PDT000117376.2 | SAMEA1464524 | SAMEA1464524 | ERR134373 | GCA 900058115.1 | N/A |
| PDT000117378.2 | SAMEA1317329 | SAMEA1317329 | ERR111090 | GCA 900046265.1 | N/A |
| PDT000117406.2 | SAMEA1317556 | SAMEA1317556 | ERR223127 | GCA 900020295.1 | N/A |
| PDT000117422.2 | SAMEA1317437 | SAMEA1317437 | ERR107809 | GCA 900060035.1 | N/A |
| PDT000117425.2 | SAMEA1317316 | SAMEA1317316 | ERR107846 | GCA 900054485.1 | N/A |
| PDT000117443.2 | SAMEA1464495 | SAMEA1464495 | ERR129265 | GCA 900020325.1 | N/A |
| PDT000117451.2 | SAMEA1464636 | SAMEA1464636 | ERR118411 | GCA 900042185.1 | N/A |
| PDT000117459.2 | SAMEA1464601 | SAMEA1464601 | ERR124498 | GCA 900057795.1 | N/A |
| PDT000117467.2 | SAMEA1317312 | SAMEA1317312 | ERR107821 | GCA 900047475.1 | N/A |
| PDT000117475.2 | SAMEA1469697 | SAMEA1469697 | ERR158752 | GCA 900050645.1 | N/A |
| PDT000117480.2 | SAMEA1464332 | SAMEA1464332 | ERR134366 | GCA 900045215.1 | N/A |
| PDT000117481.2 | SAMEA1464414 | SAMEA1464414 | ERR118433 | GCA 900044565.1 | N/A |
| PDT000117486.2 | SAMEA1464381 | SAMEA1464381 | ERR134410 | GCA 900052645.1 | N/A |
| PDT000117490.2 | SAMEA1469640 | SAMEA1469640 | ERR158784 | GCA 900048365.1 | N/A |
| PDT000117496.2 | SAMEA1317337 | SAMEA1317337 | ERR111102 | GCA 900052115.1 | N/A |
| PDT000117508.2 | SAMEA1469544 | SAMEA1469544 | ERR158797 | GCA 900049425.1 | N/A |
| PDT000117517.2 | SAMEA1317402 | SAMEA1317402 | ERR107806 | GCA 900038435.1 | N/A |
| PDT000117531.2 | SAMEA1464364 | SAMEA1464364 | ERR118477 | GCA 900039935.1 | N/A |
| PDT000117532.2 | SAMEA1464498 | SAMEA1464498 | ERR118603 | GCA 900044455.1 | N/A |
| PDT000117533.2 | SAMEA1317307 | SAMEA1317307 | ERR111055 | GCA 900041055.1 | N/A |
| PDT000117537.2 | SAMEA1464209 | SAMEA1464209 | ERR118551 | GCA 900038215.1 | N/A |
| PDT000117539.2 | SAMEA1464313 | SAMEA1464313 | ERR124517 | GCA 900049445.1 | N/A |
| PDT000117545.2 | SAMEA1464174 | SAMEA1464174 | ERR118407 | GCA 900017585.1 | N/A |
| PDT000117578.2 | SAMEA1464252 | SAMEA1464252 | ERR118537 | GCA 900038825.1 | N/A |
| PDT000117580.2 | SAMEA1469550 | SAMEA1469550 | ERR158769 | GCA 900048275.1 | N/A |
| PDT000117587.2 | SAMEA1464516 | SAMEA1464516 | ERR118562 | GCA 900038235.1 | N/A |
| PDT000117591.2 | SAMEA1464349 | SAMEA1464349 | ERR124446 | GCA 900042225.1 | N/A |
| PDT000117594.2 | SAMEA1469559 | SAMEA1469559 | ERR158791 | GCA 900048085.1 | N/A |
| PDT000117595.2 | SAMEA1317409 | SAMEA1317409 | ERR111086 | GCA 900046235.1 | N/A |
| PDT000117600.2 | SAMEA1464184 | SAMEA1464184 | ERR134337 | GCA 900041895.1 | N/A |
| PDT000117602.2 | SAMEA1464188 | SAMEA1464188 | ERR134342 | GCA 900038415.1 | N/A |
| PDT000117603.2 | SAMEA1469569 | SAMEA1469569 | ERR158690 | GCA 900039005.1 | N/A |
| PDT000117614.2 | SAMEA1317349 | SAMEA1317349 | ERR111089 | GCA 900046255.1 | N/A |
| PDT000117617.2 | SAMEA1469592 | SAMEA1469592 | ERR158659 | GCA 900042085.1 | N/A |
| PDT000117627.2 | SAMEA1469621 | SAMEA1469621 | ERR158644 | GCA 900040415.1 | N/A |
| PDT000117640.2 | SAMEA1464375 | SAMEA1464375 | ERR134363 | GCA 900041235.1 | N/A |
| PDT000117648.2 | SAMEA1464641 | SAMEA1464641 | ERR124458 | GCA 900056255.1 | N/A |
| PDT000117654.2 | SAMEA1317580 | SAMEA1317580 | ERR107942 | GCA 900048645.1 | N/A |
| PDT000117656.2 | SAMEA1464527 | SAMEA1464527 | ERR124453 | GCA 900051045.1 | N/A |
| PDT000117666.2 | SAMEA1469696 | SAMEA1469696 | ERR158675 | GCA 900038995.1 | N/A |
| PDT000117671.2 | SAMEA1464561 | SAMEA1464561 | ERR118589 | GCA 900038465.1 | N/A |
| PDT000117676.2 | SAMEA1464296 | SAMEA1464296 | ERR124495 | GCA 900058615.1 | N/A |
| PDT000117679.2 | SAMEA1464689 | SAMEA1464689 | ERR118606 | GCA 900047515.1 | N/A |
| PDT000117684.2 | SAMEA1317408 | SAMEA1317408 | ERR111111 | GCA 900062885.1 | N/A |
| PDT000117700.2 | SAMEA1317530 | SAMEA1317530 | ERR107930 | GCA 900065325.1 | N/A |
| PDT000117701.2 | SAMEA1464193 | SAMEA1464193 | ERR124505 | GCA 900049435.1 | N/A |
| PDT000117712.2 | SAMEA1464179 | SAMEA1464179 | ERR118530 | GCA 900044405.1 | N/A |
| PDT000117737.2 | SAMEA1317572 | SAMEA1317572 | ERR111092 | GCA 900040555.1 | N/A |
| PDT000117751.2 | SAMEA1317445 | SAMEA1317445 | ERR107854 | GCA 900038745.1 | N/A |
| PDT000117753.2 | SAMEA1469548 | SAMEA1469548 | ERR158645 | GCA 900038565.1 | N/A |
| PDT000117768.2 | SAMEA1317405 | SAMEA1317405 | ERR111061 | GCA 900041065.1 | N/A |
| PDT000117777.2 | SAMEA1464705 | SAMEA1464705 | ERR134349 | GCA 900039825.1 | N/A |
| PDT000117787.2 | SAMEA1317345 | SAMEA1317345 | ERR107932 | GCA 900038905.1 | N/A |
| PDT000117794.2 | SAMEA1464500 | SAMEA1464500 | ERR118464 | GCA 900039895.1 | N/A |
| PDT000117805.2 | SAMEA1464512 | SAMEA1464512 | ERR124447 | GCA 900040585.1 | N/A |
| PDT000117818.2 | SAMEA1464456 | SAMEA1464456 | ERR124524 | GCA 900063325.1 | N/A |
| PDT000117824.2 | SAMEA1464490 | SAMEA1464490 | ERR124522 | GCA 900065455.1 | N/A |

|                |              |              |           |                 |     |
|----------------|--------------|--------------|-----------|-----------------|-----|
| PDT000117831.2 | SAMEA1469711 | SAMEA1469711 | ERR158743 | GCA 900049415.1 | N/A |
| PDT000117833.2 | SAMEA1469663 | SAMEA1469663 | ERR158703 | GCA 900040165.1 | N/A |
| PDT000117836.2 | SAMEA1317359 | SAMEA1317359 | ERR107902 | GCA 900020305.1 | N/A |
| PDT000117839.2 | SAMEA1469686 | SAMEA1469686 | ERR158733 | GCA 900044615.1 | N/A |
| PDT000117854.2 | SAMEA1464448 | SAMEA1464448 | ERR129330 | GCA 900048615.1 | N/A |
| PDT000117872.2 | SAMEA1464249 | SAMEA1464249 | ERR118383 | GCA 900020235.1 | N/A |
| PDT000117873.2 | SAMEA1469573 | SAMEA1469573 | ERR158790 | GCA 900048405.1 | N/A |
| PDT000117882.2 | SAMEA1469667 | SAMEA1469667 | ERR158775 | GCA 900048315.1 | N/A |
| PDT000117893.2 | SAMEA1464361 | SAMEA1464361 | ERR129290 | GCA 900039695.1 | N/A |
| PDT000117894.2 | SAMEA1464474 | SAMEA1464474 | ERR118462 | GCA 900039885.1 | N/A |
| PDT000117896.2 | SAMEA1464494 | SAMEA1464494 | ERR118419 | GCA 900039085.1 | N/A |
| PDT000117899.2 | SAMEA1464540 | SAMEA1464540 | ERR118396 | GCA 900018285.1 | N/A |
| PDT000117905.2 | SAMEA1464274 | SAMEA1464274 | ERR118531 | GCA 900047495.1 | N/A |
| PDT000117907.2 | SAMEA1317425 | SAMEA1317425 | ERR111116 | GCA 900046345.1 | N/A |
| PDT000117931.2 | SAMEA1464388 | SAMEA1464388 | ERR129308 | GCA 900048565.1 | N/A |
| PDT000117957.2 | SAMEA1464386 | SAMEA1464386 | ERR129260 | GCA 900047285.1 | N/A |
| PDT000117965.2 | SAMEA1469693 | SAMEA1469693 | ERR158697 | GCA 900039025.1 | N/A |
| PDT000117977.2 | SAMEA2298604 | SAMEA2298604 | ERR494746 | GCA 900070265.1 | N/A |
| PDT000117985.2 | SAMEA1464267 | SAMEA1464267 | ERR124530 | GCA 900057295.1 | N/A |
| PDT000117998.2 | SAMEA1469543 | SAMEA1469543 | ERR158643 | GCA 900038985.1 | N/A |
| PDT000118000.2 | SAMEA1469636 | SAMEA1469636 | ERR158760 | GCA 900048225.1 | N/A |
| PDT000118001.2 | SAMEA1469627 | SAMEA1469627 | ERR158636 | GCA 900037905.1 | N/A |
| PDT000118006.2 | SAMEA1317428 | SAMEA1317428 | ERR107851 | GCA 900035795.1 | N/A |
| PDT000118026.2 | SAMEA1469692 | SAMEA1469692 | ERR158676 | GCA 900020405.1 | N/A |
| PDT000118041.2 | SAMEA1317393 | SAMEA1317393 | ERR107869 | GCA 900044465.1 | N/A |
| PDT000118046.2 | SAMEA1317557 | SAMEA1317557 | ERR107969 | GCA 900017965.1 | N/A |
| PDT000118048.2 | SAMEA1464435 | SAMEA1464435 | ERR134389 | GCA 900054455.1 | N/A |
| PDT000118052.2 | SAMEA1464254 | SAMEA1464254 | ERR124467 | GCA 900057285.1 | N/A |
| PDT000118064.2 | SAMEA1464526 | SAMEA1464526 | ERR118457 | GCA 900043635.1 | N/A |
| PDT000118073.2 | SAMEA1464682 | SAMEA1464682 | ERR118484 | GCA 900041805.1 | N/A |
| PDT000118081.2 | SAMEA1317351 | SAMEA1317351 | ERR107952 | GCA 900048695.1 | N/A |
| PDT000118086.2 | SAMEA1464684 | SAMEA1464684 | ERR129320 | GCA 900048595.1 | N/A |
| PDT000118089.2 | SAMEA1317383 | SAMEA1317383 | ERR107934 | GCA 900038915.1 | N/A |
| PDT000118095.2 | SAMEA1317554 | SAMEA1317554 | ERR111093 | GCA 900041135.1 | N/A |
| PDT000118097.2 | SAMEA1464275 | SAMEA1464275 | ERR118473 | GCA 900020445.1 | N/A |
| PDT000118099.2 | SAMEA1464453 | SAMEA1464453 | ERR124527 | GCA 900056675.1 | N/A |
| PDT000118102.2 | SAMEA1469588 | SAMEA1469588 | ERR158709 | GCA 900039775.1 | N/A |
| PDT000118105.2 | SAMEA1464664 | SAMEA1464664 | ERR118500 | GCA 900052365.1 | N/A |
| PDT000118107.2 | SAMEA1464362 | SAMEA1464362 | ERR124460 | GCA 900060045.1 | N/A |
| PDT000118143.2 | SAMEA1317453 | SAMEA1317453 | ERR111058 | GCA 900042515.1 | N/A |
| PDT000118144.2 | SAMEA1317438 | SAMEA1317438 | ERR111083 | GCA 900045155.1 | N/A |
| PDT000118162.2 | SAMEA1317448 | SAMEA1317448 | ERR107946 | GCA 900037775.1 | N/A |
| PDT000118163.2 | SAMEA1469704 | SAMEA1469704 | ERR158722 | GCA 900031675.1 | N/A |
| PDT000118169.2 | SAMEA1464605 | SAMEA1464605 | ERR118533 | GCA 900045605.1 | N/A |
| PDT000118189.2 | SAMEA1317413 | SAMEA1317413 | ERR107899 | GCA 900048515.1 | N/A |
| PDT000118197.2 | SAMEA1317418 | SAMEA1317418 | ERR111126 | GCA 900054475.1 | N/A |
| PDT000118206.2 | SAMEA1464579 | SAMEA1464579 | ERR129315 | GCA 900047415.1 | N/A |
| PDT000118225.2 | SAMEA1929517 | SAMEA1929517 | ERR387196 | GCA 900070305.1 | N/A |
| PDT000118229.2 | SAMEA1317592 | SAMEA1317592 | ERR111077 | GCA 900046225.1 | N/A |
| PDT000118232.2 | SAMEA1469624 | SAMEA1469624 | ERR158641 | GCA 900046065.1 | N/A |
| PDT000118237.2 | SAMEA1317555 | SAMEA1317555 | ERR107935 | GCA 900041965.1 | N/A |
| PDT000118251.2 | SAMEA1464215 | SAMEA1464215 | ERR118453 | GCA 900039195.1 | N/A |
| PDT000118260.2 | SAMEA1317434 | SAMEA1317434 | ERR107870 | GCA 900056965.1 | N/A |
| PDT000118261.2 | SAMEA1464612 | SAMEA1464612 | ERR118509 | GCA 900050275.1 | N/A |
| PDT000118275.2 | SAMEA1317338 | SAMEA1317338 | ERR111071 | GCA 900040525.1 | N/A |
| PDT000118284.2 | SAMEA1464552 | SAMEA1464552 | ERR118458 | GCA 900039215.1 | N/A |
| PDT000118295.2 | SAMEA1464266 | SAMEA1464266 | ERR118593 | GCA 900045715.1 | N/A |
| PDT000118300.2 | SAMEA1464367 | SAMEA1464367 | ERR134369 | GCA 900017695.1 | N/A |
| PDT000118312.2 | SAMEA1317315 | SAMEA1317315 | ERR111062 | GCA 900064555.1 | N/A |
| PDT000118318.2 | SAMEA1469571 | SAMEA1469571 | ERR158638 | GCA 900020225.1 | N/A |
| PDT000118320.2 | SAMEA1317339 | SAMEA1317339 | ERR107889 | GCA 900041915.1 | N/A |
| PDT000118325.2 | SAMEA1464510 | SAMEA1464510 | ERR134392 | GCA 900064525.1 | N/A |
| PDT000118326.2 | SAMEA1464451 | SAMEA1464451 | ERR134346 | GCA 900042135.1 | N/A |
| PDT000118332.2 | SAMEA1464694 | SAMEA1464694 | ERR134378 | GCA 900045265.1 | N/A |
| PDT000118343.2 | SAMEA1464596 | SAMEA1464596 | ERR118517 | GCA 900062135.1 | N/A |
| PDT000118354.2 | SAMEA1464463 | SAMEA1464463 | ERR124525 | GCA 900056275.1 | N/A |
| PDT000118355.2 | SAMEA1464281 | SAMEA1464281 | ERR124461 | GCA 900064235.1 | N/A |
| PDT000118358.2 | SAMEA1464492 | SAMEA1464492 | ERR134354 | GCA 900046025.1 | N/A |

|                |              |              |           |                 |     |
|----------------|--------------|--------------|-----------|-----------------|-----|
| PDT000118369.2 | SAMEA1317537 | SAMEA1317537 | ERR107923 | GCA 900044985.1 | N/A |
| PDT000118370.2 | SAMEA1464227 | SAMEA1464227 | ERR118502 | GCA 900042275.1 | N/A |
| PDT000118382.2 | SAMEA1464461 | SAMEA1464461 | ERR118585 | GCA 900039705.1 | N/A |
| PDT000118383.2 | SAMEA1469718 | SAMEA1469718 | ERR158772 | GCA 900048305.1 | N/A |
| PDT000118384.2 | SAMEA1464436 | SAMEA1464436 | ERR134359 | GCA 900052125.1 | N/A |
| PDT000118385.2 | SAMEA1464409 | SAMEA1464409 | ERR124513 | GCA 900050625.1 | N/A |
| PDT000118408.2 | SAMEA1464530 | SAMEA1464530 | ERR134333 | GCA 900045115.1 | N/A |
| PDT000118432.2 | SAMEA1317468 | SAMEA1317468 | ERR107794 | GCA 900038815.1 | N/A |
| PDT000118442.2 | SAMEA1317346 | SAMEA1317346 | ERR111059 | GCA 900054915.1 | N/A |
| PDT000118454.2 | SAMEA1469564 | SAMEA1469564 | ERR158647 | GCA 900049385.1 | N/A |
| PDT000118455.2 | SAMEA1464378 | SAMEA1464378 | ERR129284 | GCA 900047345.1 | N/A |
| PDT000118475.2 | SAMEA1317343 | SAMEA1317343 | ERR111091 | GCA 900036405.1 | N/A |
| PDT000118490.2 | SAMEA1464505 | SAMEA1464505 | ERR134383 | GCA 900057105.1 | N/A |
| PDT000118491.2 | SAMEA1469675 | SAMEA1469675 | ERR158655 | GCA 900037965.1 | N/A |
| PDT000118504.2 | SAMEA1464437 | SAMEA1464437 | ERR134334 | GCA 900018695.1 | N/A |
| PDT000118505.2 | SAMEA1464665 | SAMEA1464665 | ERR118354 | GCA 900051805.1 | N/A |
| PDT000118506.2 | SAMEA1464263 | SAMEA1464263 | ERR118594 | GCA 900017485.1 | N/A |
| PDT000118509.2 | SAMEA1464294 | SAMEA1464294 | ERR118339 | GCA 900038945.1 | N/A |
| PDT000118540.2 | SAMEA1464475 | SAMEA1464475 | ERR134384 | GCA 900058105.1 | N/A |
| PDT000118543.2 | SAMEA1464202 | SAMEA1464202 | ERR129325 | GCA 900020275.1 | N/A |
| PDT000118547.2 | SAMEA1464371 | SAMEA1464371 | ERR118353 | GCA 900018025.1 | N/A |
| PDT000118550.2 | SAMEA1317542 | SAMEA1317542 | ERR223142 | GCA 900036895.1 | N/A |
| PDT000118551.2 | SAMEA2298603 | SAMEA2298603 | ERR494745 | GCA 900070215.1 | N/A |
| PDT000118572.2 | SAMEA1469606 | SAMEA1469606 | ERR158708 | GCA 900065345.1 | N/A |
| PDT000118578.2 | SAMEA1317443 | SAMEA1317443 | ERR107793 | GCA 900044415.1 | N/A |
| PDT000118579.2 | SAMEA1464691 | SAMEA1464691 | ERR129328 | GCA 900048605.1 | N/A |
| PDT000118587.2 | SAMEA1464384 | SAMEA1464384 | ERR129262 | GCA 900041935.1 | N/A |
| PDT000118594.2 | SAMEA1469708 | SAMEA1469708 | ERR158670 | GCA 900039725.1 | N/A |
| PDT000118596.2 | SAMEA1464645 | SAMEA1464645 | ERR129324 | GCA 900038805.1 | N/A |
| PDT000118605.2 | SAMEA1464528 | SAMEA1464528 | ERR118392 | GCA 900040255.1 | N/A |
| PDT000118615.2 | SAMEA1464483 | SAMEA1464483 | ERR118461 | GCA 900040365.1 | N/A |
| PDT000118616.2 | SAMEA1464315 | SAMEA1464315 | ERR118377 | GCA 900042155.1 | N/A |
| PDT000118621.2 | SAMEA1469699 | SAMEA1469699 | ERR158729 | GCA 900042735.1 | N/A |
| PDT000118629.2 | SAMEA1317451 | SAMEA1317451 | ERR107868 | GCA 900035825.1 | N/A |
| PDT000118636.2 | SAMEA1464718 | SAMEA1464718 | ERR118557 | GCA 900019125.1 | N/A |
| PDT000118647.2 | SAMEA1464207 | SAMEA1464207 | ERR118332 | GCA 900040925.1 | N/A |
| PDT000118649.2 | SAMEA1464444 | SAMEA1464444 | ERR118472 | GCA 900041025.1 | N/A |
| PDT000118665.2 | SAMEA1317503 | SAMEA1317503 | ERR107922 | GCA 900040085.1 | N/A |
| PDT000118669.2 | SAMEA1464217 | SAMEA1464217 | ERR129306 | GCA 900045985.1 | N/A |
| PDT000118674.2 | SAMEA1464198 | SAMEA1464198 | ERR124510 | GCA 900053455.1 | N/A |
| PDT000118680.2 | SAMEA1469583 | SAMEA1469583 | ERR158710 | GCA 900018255.1 | N/A |
| PDT000118693.2 | SAMEA1464333 | SAMEA1464333 | ERR129329 | GCA 900038425.1 | N/A |
| PDT000118712.2 | SAMEA1317391 | SAMEA1317391 | ERR111076 | GCA 900062795.1 | N/A |
| PDT000118714.2 | SAMEA1464558 | SAMEA1464558 | ERR124490 | GCA 900051375.1 | N/A |
| PDT000118728.2 | SAMEA1464590 | SAMEA1464590 | ERR129278 | GCA 900047335.1 | N/A |
| PDT000118729.2 | SAMEA1317553 | SAMEA1317553 | ERR107877 | GCA 900048135.1 | N/A |
| PDT000118733.2 | SAMEA1568643 | SAMEA1568643 | ERR211892 | GCA 900045935.1 | N/A |
| PDT000118739.2 | SAMEA1464644 | SAMEA1464644 | ERR118475 | GCA 900058895.1 | N/A |
| PDT000118741.2 | SAMEA1317309 | SAMEA1317309 | ERR107955 | GCA 900048705.1 | N/A |
| PDT000118746.2 | SAMEA1464372 | SAMEA1464372 | ERR124518 | GCA 900059815.1 | N/A |
| PDT000118757.2 | SAMEA1464366 | SAMEA1464366 | ERR134407 | GCA 900059805.1 | N/A |
| PDT000118763.2 | SAMEA1464539 | SAMEA1464539 | ERR124507 | GCA 900060805.1 | N/A |
| PDT000118769.2 | SAMEA1464410 | SAMEA1464410 | ERR134338 | GCA 900038345.1 | N/A |
| PDT000118774.2 | SAMEA1464329 | SAMEA1464329 | ERR129271 | GCA 900061985.1 | N/A |
| PDT000118775.2 | SAMEA1464635 | SAMEA1464635 | ERR124511 | GCA 900024965.1 | N/A |
| PDT000118776.2 | SAMEA1317591 | SAMEA1317591 | ERR111063 | GCA 900046205.1 | N/A |
| PDT000118787.2 | SAMEA1464639 | SAMEA1464639 | ERR118363 | GCA 900051355.1 | N/A |
| PDT000118791.2 | SAMEA1464225 | SAMEA1464225 | ERR118553 | GCA 900038225.1 | N/A |
| PDT000118807.2 | SAMEA1464647 | SAMEA1464647 | ERR118414 | GCA 900042195.1 | N/A |
| PDT000118808.2 | SAMEA1464618 | SAMEA1464618 | ERR118421 | GCA 900018325.1 | N/A |
| PDT000118818.2 | SAMEA1464544 | SAMEA1464544 | ERR134379 | GCA 900062895.1 | N/A |
| PDT000118825.2 | SAMEA1317497 | SAMEA1317497 | ERR107956 | GCA 900063335.1 | N/A |
| PDT000118830.2 | SAMEA1464669 | SAMEA1464669 | ERR118495 | GCA 900042245.1 | N/A |
| PDT000118842.2 | SAMEA1469657 | SAMEA1469657 | ERR158618 | GCA 900018095.1 | N/A |
| PDT000118850.2 | SAMEA1464721 | SAMEA1464721 | ERR134399 | GCA 900054705.1 | N/A |
| PDT000118855.2 | SAMEA1464231 | SAMEA1464231 | ERR118612 | GCA 900046045.1 | N/A |
| PDT000118858.2 | SAMEA1464394 | SAMEA1464394 | ERR129335 | GCA 900037735.1 | N/A |
| PDT000118863.2 | SAMEA1317539 | SAMEA1317539 | ERR111100 | GCA 900037605.1 | N/A |

|                |              |              |           |                 |     |
|----------------|--------------|--------------|-----------|-----------------|-----|
| PDT000118866.2 | SAMEA1464447 | SAMEA1464447 | ERR134390 | GCA 900064515.1 | N/A |
| PDT000118872.2 | SAMEA1317515 | SAMEA1317515 | ERR111122 | GCA 900042525.1 | N/A |
| PDT000118882.2 | SAMEA1464556 | SAMEA1464556 | ERR124450 | GCA 900051775.1 | N/A |
| PDT000118887.2 | SAMEA1469641 | SAMEA1469641 | ERR158621 | GCA 900037875.1 | N/A |
| PDT000118895.2 | SAMEA1317360 | SAMEA1317360 | ERR111109 | GCA 900052375.1 | N/A |
| PDT000118897.2 | SAMEA1464575 | SAMEA1464575 | ERR134391 | GCA 900051085.1 | N/A |
| PDT000118900.2 | SAMEA1317446 | SAMEA1317446 | ERR107840 | GCA 900048485.1 | N/A |
| PDT000118909.2 | SAMEA1568640 | SAMEA1568640 | ERR211893 | GCA 900038095.1 | N/A |
| PDT000118910.2 | SAMEA1317534 | SAMEA1317534 | ERR111078 | GCA 900040535.1 | N/A |
| PDT000118915.2 | SAMEA1317526 | SAMEA1317526 | ERR223126 | GCA 900044425.1 | N/A |
| PDT000118916.2 | SAMEA1464221 | SAMEA1464221 | ERR129327 | GCA 900020285.1 | N/A |
| PDT000118919.2 | SAMEA1464693 | SAMEA1464693 | ERR223135 | GCA 900046875.1 | N/A |
| PDT000118928.2 | SAMEA1464228 | SAMEA1464228 | ERR118494 | GCA 900045085.1 | N/A |
| PDT000118951.2 | SAMEA1464206 | SAMEA1464206 | ERR118401 | GCA 900039805.1 | N/A |
| PDT000118953.2 | SAMEA1464458 | SAMEA1464458 | ERR118569 | GCA 900038255.1 | N/A |
| PDT000118959.2 | SAMEA1464417 | SAMEA1464417 | ERR134353 | GCA 900058625.1 | N/A |
| PDT000118964.2 | SAMEA1469539 | SAMEA1469539 | ERR158642 | GCA 900037935.1 | N/A |
| PDT000118968.2 | SAMEA1464583 | SAMEA1464583 | ERR129279 | GCA 900017505.1 | N/A |
| PDT000118980.2 | SAMEA1469535 | SAMEA1469535 | ERR158765 | GCA 900048245.1 | N/A |
| PDT000118994.2 | SAMEA1317400 | SAMEA1317400 | ERR107897 | GCA 900047215.1 | N/A |
| PDT000119010.2 | SAMEA1464192 | SAMEA1464192 | ERR134339 | GCA 900047195.1 | N/A |
| PDT000119012.2 | SAMEA1317540 | SAMEA1317540 | ERR107939 | GCA 900048635.1 | N/A |
| PDT000119025.2 | SAMEA1469691 | SAMEA1469691 | ERR158753 | GCA 900042685.1 | N/A |
| PDT000119033.2 | SAMEA1464304 | SAMEA1464304 | ERR118380 | GCA 900040985.1 | N/A |
| PDT000119042.2 | SAMEA1464216 | SAMEA1464216 | ERR134361 | GCA 900046425.1 | N/A |
| PDT000119043.2 | SAMEA1317376 | SAMEA1317376 | ERR107941 | GCA 900042505.1 | N/A |
| PDT000119044.2 | SAMEA1469562 | SAMEA1469562 | ERR158738 | GCA 900041205.1 | N/A |
| PDT000119053.2 | SAMEA1469724 | SAMEA1469724 | ERR158748 | GCA 900042665.1 | N/A |
| PDT000119085.2 | SAMEA1469700 | SAMEA1469700 | ERR158673 | GCA 900039745.1 | N/A |
| PDT000119094.2 | SAMEA1464365 | SAMEA1464365 | ERR118476 | GCA 900040795.1 | N/A |
| PDT000119102.2 | SAMEA1464222 | SAMEA1464222 | ERR118504 | GCA 900042285.1 | N/A |
| PDT000119106.2 | SAMEA1317488 | SAMEA1317488 | ERR107921 | GCA 900047275.1 | N/A |
| PDT000119111.2 | SAMEA1464298 | SAMEA1464298 | ERR124526 | GCA 900049815.1 | N/A |
| PDT000119115.2 | SAMEA1469645 | SAMEA1469645 | ERR158622 | GCA 900045025.1 | N/A |
| PDT000119117.2 | SAMEA1929515 | SAMEA1929515 | ERR387097 | GCA 900070225.1 | N/A |
| PDT000119122.2 | SAMEA1469678 | SAMEA1469678 | ERR158796 | GCA 900017635.1 | N/A |
| PDT000119126.2 | SAMEA1469581 | SAMEA1469581 | ERR158691 | GCA 900018225.1 | N/A |
| PDT000119127.2 | SAMEA1317583 | SAMEA1317583 | ERR107801 | GCA 900044435.1 | N/A |
| PDT000119129.2 | SAMEA1464631 | SAMEA1464631 | ERR118532 | GCA 900043885.1 | N/A |
| PDT000119145.2 | SAMEA1469547 | SAMEA1469547 | ERR158782 | GCA 900040055.1 | N/A |
| PDT000119149.2 | SAMEA1469651 | SAMEA1469651 | ERR158624 | GCA 900045035.1 | N/A |
| PDT000119157.2 | SAMEA1469646 | SAMEA1469646 | ERR158678 | GCA 900020415.1 | N/A |
| PDT000119165.2 | SAMEA1464466 | SAMEA1464466 | ERR118568 | GCA 900038245.1 | N/A |
| PDT000119172.2 | SAMEA1469643 | SAMEA1469643 | ERR158761 | GCA 900064565.1 | N/A |
| PDT000119190.2 | SAMEA1464403 | SAMEA1464403 | ERR118412 | GCA 900019205.1 | N/A |
| PDT000119196.2 | SAMEA1464509 | SAMEA1464509 | ERR118342 | GCA 900017985.1 | N/A |
| PDT000119197.2 | SAMEA1317578 | SAMEA1317578 | ERR111097 | GCA 900057325.1 | N/A |
| PDT000119200.2 | SAMEA1464717 | SAMEA1464717 | ERR124528 | GCA 900056285.1 | N/A |
| PDT000119202.2 | SAMEA1469703 | SAMEA1469703 | ERR158665 | GCA 900048755.1 | N/A |
| PDT000119212.2 | SAMEA1469549 | SAMEA1469549 | ERR158768 | GCA 900048265.1 | N/A |
| PDT000119240.2 | SAMEA1469665 | SAMEA1469665 | ERR158804 | GCA 900045205.1 | N/A |
| PDT000119246.2 | SAMEA1317403 | SAMEA1317403 | ERR111043 | GCA 900040485.1 | N/A |
| PDT000119250.2 | SAMEA1464640 | SAMEA1464640 | ERR118367 | GCA 900038955.1 | N/A |
| PDT000119252.2 | SAMEA1464276 | SAMEA1464276 | ERR124494 | GCA 900055285.1 | N/A |
| PDT000119253.2 | SAMEA1464310 | SAMEA1464310 | ERR118574 | GCA 900038285.1 | N/A |
| PDT000119254.2 | SAMEA1464334 | SAMEA1464334 | ERR134404 | GCA 900050575.1 | N/A |
| PDT000119275.2 | SAMEA1317478 | SAMEA1317478 | ERR107789 | GCA 900018765.1 | N/A |
| PDT000119277.2 | SAMEA1469594 | SAMEA1469594 | ERR223137 | GCA 900018145.1 | N/A |
| PDT000119296.2 | SAMEA1469599 | SAMEA1469599 | ERR158660 | GCA 900018135.1 | N/A |
| PDT000119308.2 | SAMEA1464323 | SAMEA1464323 | ERR118548 | GCA 900038195.1 | N/A |
| PDT000119310.2 | SAMEA1464457 | SAMEA1464457 | ERR118347 | GCA 900017575.1 | N/A |
| PDT000119312.2 | SAMEA1464182 | SAMEA1464182 | ERR118406 | GCA 900040295.1 | N/A |
| PDT000119313.2 | SAMEA1317559 | SAMEA1317559 | ERR107928 | GCA 900037745.1 | N/A |
| PDT000119322.2 | SAMEA1464285 | SAMEA1464285 | ERR129304 | GCA 900048555.1 | N/A |
| PDT000119325.2 | SAMEA1317406 | SAMEA1317406 | ERR107949 | GCA 900048675.1 | N/A |
| PDT000119331.2 | SAMEA1469654 | SAMEA1469654 | ERR158702 | GCA 900039765.1 | N/A |
| PDT000119341.2 | SAMEA1317441 | SAMEA1317441 | ERR107836 | GCA 900035755.1 | N/A |
| PDT000119344.2 | SAMEA1317414 | SAMEA1317414 | ERR111119 | GCA 900046365.1 | N/A |

|                |              |              |           |                 |     |
|----------------|--------------|--------------|-----------|-----------------|-----|
| PDT000119348.2 | SAMEA1317454 | SAMEA1317454 | ERR107888 | GCA 900045825.1 | N/A |
| PDT000119349.2 | SAMEA1464234 | SAMEA1464234 | ERR124489 | GCA 900052345.1 | N/A |
| PDT000119350.2 | SAMEA1464258 | SAMEA1464258 | ERR124491 | GCA 900050585.1 | N/A |
| PDT000119351.2 | SAMEA1464467 | SAMEA1464467 | ERR129318 | GCA 900047435.1 | N/A |
| PDT000119355.2 | SAMEA1929647 | SAMEA1929647 | ERR387166 | GCA 900070235.1 | N/A |
| PDT000119358.2 | SAMEA1464563 | SAMEA1464563 | ERR118592 | GCA 900038475.1 | N/A |
| PDT000119362.2 | SAMEA1464233 | SAMEA1464233 | ERR118340 | GCA 900020465.1 | N/A |
| PDT000119375.2 | SAMEA1469669 | SAMEA1469669 | ERR158648 | GCA 900038585.1 | N/A |
| PDT000119382.2 | SAMEA1464236 | SAMEA1464236 | ERR134335 | GCA 900040725.1 | N/A |
| PDT000119393.2 | SAMEA1464503 | SAMEA1464503 | ERR124503 | GCA 900051345.1 | N/A |
| PDT000119394.2 | SAMEA1317520 | SAMEA1317520 | ERR107905 | GCA 900038785.1 | N/A |
| PDT000119396.2 | SAMEA1464638 | SAMEA1464638 | ERR124496 | GCA 900057345.1 | N/A |
| PDT000119407.2 | SAMEA1317504 | SAMEA1317504 | ERR107847 | GCA 900038735.1 | N/A |
| PDT000119431.2 | SAMEA1464324 | SAMEA1464324 | ERR134351 | GCA 900022645.1 | N/A |
| PDT000119435.2 | SAMEA1464176 | SAMEA1464176 | ERR118343 | GCA 900042025.1 | N/A |
| PDT000119441.2 | SAMEA1464352 | SAMEA1464352 | ERR134355 | GCA 900039945.1 | N/A |
| PDT000119449.2 | SAMEA1317545 | SAMEA1317545 | ERR111114 | GCA 900036885.1 | N/A |
| PDT000119455.2 | SAMEA1464585 | SAMEA1464585 | ERR134332 | GCA 900044885.1 | N/A |
| PDT000119458.2 | SAMEA1464240 | SAMEA1464240 | ERR223128 | GCA 900018775.1 | N/A |
| PDT000119461.2 | SAMEA1464608 | SAMEA1464608 | ERR124480 | GCA 900063955.1 | N/A |
| PDT000119481.2 | SAMEA1464593 | SAMEA1464593 | ERR124475 | GCA 900043575.1 | N/A |
| PDT000119495.2 | SAMEA1317522 | SAMEA1317522 | ERR111095 | GCA 900046275.1 | N/A |
| PDT000119503.2 | SAMEA1464306 | SAMEA1464306 | ERR124464 | GCA 900051795.1 | N/A |
| PDT000119505.2 | SAMEA1469595 | SAMEA1469595 | ERR158805 | GCA 900017665.1 | N/A |
| PDT000119519.2 | SAMEA1464622 | SAMEA1464622 | ERR118588 | GCA 900047155.1 | N/A |
| PDT000119524.2 | SAMEA1469647 | SAMEA1469647 | ERR158617 | GCA 900046885.1 | N/A |
| PDT000119527.2 | SAMEA1469572 | SAMEA1469572 | ERR158792 | GCA 900017605.1 | N/A |
| PDT000119533.2 | SAMEA1464322 | SAMEA1464322 | ERR118482 | GCA 900041795.1 | N/A |
| PDT000119540.2 | SAMEA1464261 | SAMEA1464261 | ERR118555 | GCA 900040115.1 | N/A |
| PDT000119549.2 | SAMEA1464318 | SAMEA1464318 | ERR124465 | GCA 900051055.1 | N/A |
| PDT000119560.2 | SAMEA1464609 | SAMEA1464609 | ERR124497 | GCA 900058365.1 | N/A |
| PDT000119565.2 | SAMEA1464459 | SAMEA1464459 | ERR118607 | GCA 900045745.1 | N/A |
| PDT000119574.2 | SAMEA1464232 | SAMEA1464232 | ERR134370 | GCA 900054715.1 | N/A |
| PDT000119585.2 | SAMEA1464656 | SAMEA1464656 | ERR118536 | GCA 900045555.1 | N/A |
| PDT000119590.2 | SAMEA1469698 | SAMEA1469698 | ERR158756 | GCA 900042705.1 | N/A |
| PDT000132660.2 | SAMEA2384708 | SAMEA2384708 | ERR554630 | GCA 900082375.1 | N/A |
| PDT000132661.2 | SAMEA2384037 | SAMEA2384037 | ERR540241 | GCA 900081035.1 | N/A |
| PDT000132662.2 | SAMEA2236426 | SAMEA2236426 | ERR422879 | GCA 900080315.1 | N/A |
| PDT000132663.2 | SAMEA2384820 | SAMEA2384820 | ERR554742 | GCA 900082555.1 | N/A |
| PDT000132664.2 | SAMEA2236454 | SAMEA2236454 | ERR422907 | GCA 900080615.1 | N/A |
| PDT000132665.2 | SAMEA2384594 | SAMEA2384594 | ERR554516 | GCA 900082205.1 | N/A |
| PDT000132666.2 | SAMEA2384878 | SAMEA2384878 | ERR554800 | GCA 900082995.1 | N/A |
| PDT000132669.2 | SAMEA2383969 | SAMEA2383969 | ERR540173 | GCA 900080865.1 | N/A |
| PDT000132671.2 | SAMEA2384079 | SAMEA2384079 | ERR540283 | GCA 900081015.1 | N/A |
| PDT000132672.2 | SAMEA2384530 | SAMEA2384530 | ERR554452 | GCA 900081985.1 | N/A |
| PDT000132673.2 | SAMEA2384595 | SAMEA2384595 | ERR554517 | GCA 900082225.1 | N/A |
| PDT000132674.2 | SAMEA2236491 | SAMEA2236491 | ERR422944 | GCA 900080805.1 | N/A |
| PDT000132675.2 | SAMEA2384881 | SAMEA2384881 | ERR554803 | GCA 900083005.1 | N/A |
| PDT000132676.2 | SAMEA2236409 | SAMEA2236409 | ERR422955 | GCA 900080545.1 | N/A |
| PDT000132677.2 | SAMEA2236423 | SAMEA2236423 | ERR422876 | GCA 900080505.1 | N/A |
| PDT000132678.2 | SAMEA2384424 | SAMEA2384424 | ERR554347 | GCA 900081745.1 | N/A |
| PDT000132680.2 | SAMEA2384046 | SAMEA2384046 | ERR540250 | GCA 900080955.1 | N/A |
| PDT000132681.2 | SAMEA2236412 | SAMEA2236412 | ERR422958 | GCA 900080795.1 | N/A |
| PDT000132682.2 | SAMEA2384858 | SAMEA2384858 | ERR554780 | GCA 900082835.1 | N/A |
| PDT000132683.2 | SAMEA2384071 | SAMEA2384071 | ERR540275 | GCA 900081005.1 | N/A |
| PDT000132684.2 | SAMEA2384850 | SAMEA2384850 | ERR554772 | GCA 900082765.1 | N/A |
| PDT000132686.2 | SAMEA2445529 | SAMEA2445529 | ERR573232 | GCA 900083135.1 | N/A |
| PDT000132687.2 | SAMEA2236419 | SAMEA2236419 | ERR422965 | GCA 900080445.1 | N/A |
| PDT000132688.2 | SAMEA2384579 | SAMEA2384579 | ERR554501 | GCA 900082175.1 | N/A |
| PDT000132689.2 | SAMEA2384570 | SAMEA2384570 | ERR554492 | GCA 900082145.1 | N/A |
| PDT000132690.2 | SAMEA2384869 | SAMEA2384869 | ERR554791 | GCA 900082915.1 | N/A |
| PDT000132691.2 | SAMEA2236439 | SAMEA2236439 | ERR422892 | GCA 900080405.1 | N/A |
| PDT000132692.2 | SAMEA2236473 | SAMEA2236473 | ERR422926 | GCA 900080465.1 | N/A |
| PDT000132695.2 | SAMEA2236442 | SAMEA2236442 | ERR422895 | GCA 900080255.1 | N/A |
| PDT000132696.2 | SAMEA2236417 | SAMEA2236417 | ERR422963 | GCA 900080285.1 | N/A |
| PDT000132699.2 | SAMEA2384353 | SAMEA2384353 | ERR554277 | GCA 900081575.1 | N/A |
| PDT000132700.2 | SAMEA2383889 | SAMEA2383889 | ERR554098 | GCA 900081215.1 | N/A |
| PDT000132701.2 | SAMEA2384047 | SAMEA2384047 | ERR540251 | GCA 900080965.1 | N/A |

|                |              |              |           |                 |     |
|----------------|--------------|--------------|-----------|-----------------|-----|
| PDT000132702.2 | SAMEA2384812 | SAMEA2384812 | ERR554734 | GCA 900082505.1 | N/A |
| PDT000132703.2 | SAMEA2384265 | SAMEA2384265 | ERR554189 | GCA 900081375.1 | N/A |
| PDT000132704.2 | SAMEA2384321 | SAMEA2384321 | ERR554245 | GCA 900081595.1 | N/A |
| PDT000132706.2 | SAMEA2384798 | SAMEA2384798 | ERR554720 | GCA 900082775.1 | N/A |
| PDT000132707.2 | SAMEA2384272 | SAMEA2384272 | ERR554196 | GCA 900081385.1 | N/A |
| PDT000132709.2 | SAMEA2384480 | SAMEA2384480 | ERR554402 | GCA 900081885.1 | N/A |
| PDT000132710.2 | SAMEA2236468 | SAMEA2236468 | ERR422921 | GCA 900080295.1 | N/A |
| PDT000132711.2 | SAMEA2384456 | SAMEA2384456 | ERR554378 | GCA 900081835.1 | N/A |
| PDT000132712.2 | SAMEA2236476 | SAMEA2236476 | ERR422929 | GCA 900080715.1 | N/A |
| PDT000132714.2 | SAMEA2384117 | SAMEA2384117 | ERR540321 | GCA 900081165.1 | N/A |
| PDT000132715.2 | SAMEA2236446 | SAMEA2236446 | ERR422992 | GCA 900080265.1 | N/A |
| PDT000132718.2 | SAMEA2445505 | SAMEA2445505 | ERR573208 | GCA 900083105.1 | N/A |
| PDT000132719.2 | SAMEA2236434 | SAMEA2236434 | ERR422980 | GCA 900080555.1 | N/A |
| PDT000132720.2 | SAMEA2384799 | SAMEA2384799 | ERR554721 | GCA 900082865.1 | N/A |
| PDT000132721.2 | SAMEA2384531 | SAMEA2384531 | ERR554453 | GCA 900081995.1 | N/A |
| PDT000132723.2 | SAMEA2384826 | SAMEA2384826 | ERR554748 | GCA 900082595.1 | N/A |
| PDT000132724.2 | SAMEA2384873 | SAMEA2384873 | ERR554795 | GCA 900082975.1 | N/A |
| PDT000132726.2 | SAMEA2384438 | SAMEA2384438 | ERR554361 | GCA 900081775.1 | N/A |
| PDT000132727.2 | SAMEA2384273 | SAMEA2384273 | ERR554197 | GCA 900081395.1 | N/A |
| PDT000132728.2 | SAMEA2445591 | SAMEA2445591 | ERR573294 | GCA 900083225.1 | N/A |
| PDT000132729.2 | SAMEA2445509 | SAMEA2445509 | ERR573212 | GCA 900083115.1 | N/A |
| PDT000132730.2 | SAMEA2384810 | SAMEA2384810 | ERR554732 | GCA 900082485.1 | N/A |
| PDT000132731.2 | SAMEA2236455 | SAMEA2236455 | ERR422908 | GCA 900080705.1 | N/A |
| PDT000132732.2 | SAMEA2236408 | SAMEA2236408 | ERR422861 | GCA 900080605.1 | N/A |
| PDT000132733.2 | SAMEA2384518 | SAMEA2384518 | ERR554440 | GCA 900081935.1 | N/A |
| PDT000132734.2 | SAMEA2236484 | SAMEA2236484 | ERR423030 | GCA 900080765.1 | N/A |
| PDT000132735.2 | SAMEA2236427 | SAMEA2236427 | ERR422880 | GCA 900080335.1 | N/A |
| PDT000132737.2 | SAMEA2384554 | SAMEA2384554 | ERR554476 | GCA 900082075.1 | N/A |
| PDT000132738.2 | SAMEA2384558 | SAMEA2384558 | ERR554480 | GCA 900082095.1 | N/A |
| PDT000132741.2 | SAMEA2384060 | SAMEA2384060 | ERR540264 | GCA 900080975.1 | N/A |
| PDT000132742.2 | SAMEA2236485 | SAMEA2236485 | ERR422938 | GCA 900080775.1 | N/A |
| PDT000132743.2 | SAMEA2384455 | SAMEA2384455 | ERR554377 | GCA 900081825.1 | N/A |
| PDT000132744.2 | SAMEA2384305 | SAMEA2384305 | ERR554229 | GCA 900081435.1 | N/A |
| PDT000132745.2 | SAMEA2383943 | SAMEA2383943 | ERR540147 | GCA 900080905.1 | N/A |
| PDT000132746.2 | SAMEA2236470 | SAMEA2236470 | ERR423016 | GCA 900080425.1 | N/A |
| PDT000132748.2 | SAMEA2384802 | SAMEA2384802 | ERR554724 | GCA 900082445.1 | N/A |
| PDT000132750.2 | SAMEA2236472 | SAMEA2236472 | ERR422925 | GCA 900080455.1 | N/A |
| PDT000132751.2 | SAMEA2384511 | SAMEA2384511 | ERR554433 | GCA 900082055.1 | N/A |
| PDT000132752.2 | SAMEA2384078 | SAMEA2384078 | ERR540282 | GCA 900081025.1 | N/A |
| PDT000132753.2 | SAMEA2236431 | SAMEA2236431 | ERR422884 | GCA 900080565.1 | N/A |
| PDT000132754.2 | SAMEA2384503 | SAMEA2384503 | ERR554425 | GCA 900081925.1 | N/A |
| PDT000132755.2 | SAMEA2445583 | SAMEA2445583 | ERR573286 | GCA 900083265.1 | N/A |
| PDT000132757.2 | SAMEA2384414 | SAMEA2384414 | ERR554337 | GCA 900081755.1 | N/A |
| PDT000132758.2 | SAMEA2445592 | SAMEA2445592 | ERR573295 | GCA 900083235.1 | N/A |
| PDT000132759.2 | SAMEA2384045 | SAMEA2384045 | ERR540249 | GCA 900080945.1 | N/A |
| PDT000132760.2 | SAMEA2384110 | SAMEA2384110 | ERR540314 | GCA 900081145.1 | N/A |
| PDT000132761.2 | SAMEA2384679 | SAMEA2384679 | ERR554601 | GCA 900082355.1 | N/A |
| PDT000132762.2 | SAMEA2384416 | SAMEA2384416 | ERR554339 | GCA 900081815.1 | N/A |
| PDT000132763.2 | SAMEA2384478 | SAMEA2384478 | ERR554400 | GCA 900081865.1 | N/A |
| PDT000132764.2 | SAMEA2384805 | SAMEA2384805 | ERR554727 | GCA 900082465.1 | N/A |
| PDT000132766.2 | SAMEA2384823 | SAMEA2384823 | ERR554745 | GCA 900082575.1 | N/A |
| PDT000132767.2 | SAMEA2384562 | SAMEA2384562 | ERR554484 | GCA 900082115.1 | N/A |
| PDT000132769.2 | SAMEA2445564 | SAMEA2445564 | ERR573267 | GCA 900083195.1 | N/A |
| PDT000132772.2 | SAMEA2236479 | SAMEA2236479 | ERR422932 | GCA 900080735.1 | N/A |
| PDT000132773.2 | SAMEA2384495 | SAMEA2384495 | ERR554417 | GCA 900081905.1 | N/A |
| PDT000132775.2 | SAMEA2384855 | SAMEA2384855 | ERR554777 | GCA 900082825.1 | N/A |
| PDT000132777.2 | SAMEA2384519 | SAMEA2384519 | ERR554441 | GCA 900081965.1 | N/A |
| PDT000132778.2 | SAMEA2384329 | SAMEA2384329 | ERR554253 | GCA 900081485.1 | N/A |
| PDT000132779.2 | SAMEA2384844 | SAMEA2384844 | ERR554766 | GCA 900082735.1 | N/A |
| PDT000132781.2 | SAMEA2384870 | SAMEA2384870 | ERR554792 | GCA 900082925.1 | N/A |
| PDT000132782.2 | SAMEA2384022 | SAMEA2384022 | ERR540226 | GCA 900080925.1 | N/A |
| PDT000132783.2 | SAMEA2384830 | SAMEA2384830 | ERR554752 | GCA 900082625.1 | N/A |
| PDT000132784.2 | SAMEA2384539 | SAMEA2384539 | ERR554461 | GCA 900082035.1 | N/A |
| PDT000132785.2 | SAMEA2384803 | SAMEA2384803 | ERR554725 | GCA 900082435.1 | N/A |
| PDT000132786.2 | SAMEA2384809 | SAMEA2384809 | ERR554731 | GCA 900082475.1 | N/A |
| PDT000132787.2 | SAMEA2383473 | SAMEA2383473 | ERR539870 | GCA 900080815.1 | N/A |
| PDT000132790.2 | SAMEA2384841 | SAMEA2384841 | ERR554763 | GCA 900082715.1 | N/A |
| PDT000132791.2 | SAMEA2236452 | SAMEA2236452 | ERR422998 | GCA 900080305.1 | N/A |



|                |              |              |           |                 |     |
|----------------|--------------|--------------|-----------|-----------------|-----|
| PDT000132792.2 | SAMEA2236469 | SAMEA2236469 | ERR423015 | GCA 900080585.1 | N/A |
| PDT000132793.2 | SAMEA2384101 | SAMEA2384101 | ERR540305 | GCA 900081095.1 | N/A |
| PDT000132794.2 | SAMEA2384514 | SAMEA2384514 | ERR554436 | GCA 900082165.1 | N/A |
| PDT000132795.2 | SAMEA2384861 | SAMEA2384861 | ERR554783 | GCA 900082855.1 | N/A |
| PDT000132796.2 | SAMEA2236435 | SAMEA2236435 | ERR422981 | GCA 900080345.1 | N/A |
| PDT000132797.2 | SAMEA2384487 | SAMEA2384487 | ERR554409 | GCA 900081895.1 | N/A |
| PDT000132798.2 | SAMEA2445493 | SAMEA2445493 | ERR573196 | GCA 900083175.1 | N/A |
| PDT000132799.2 | SAMEA2384811 | SAMEA2384811 | ERR554733 | GCA 900082495.1 | N/A |
| PDT000132800.2 | SAMEA2384526 | SAMEA2384526 | ERR554448 | GCA 900081955.1 | N/A |
| PDT000132803.2 | SAMEA2384659 | SAMEA2384659 | ERR554581 | GCA 900082335.1 | N/A |
| PDT000132806.2 | SAMEA2384100 | SAMEA2384100 | ERR540304 | GCA 900081085.1 | N/A |
| PDT000132807.2 | SAMEA2384038 | SAMEA2384038 | ERR540242 | GCA 900081065.1 | N/A |
| PDT000132809.2 | SAMEA2383961 | SAMEA2383961 | ERR540165 | GCA 900080855.1 | N/A |
| PDT000132810.2 | SAMEA2384700 | SAMEA2384700 | ERR554622 | GCA 900082395.1 | N/A |
| PDT000132811.2 | SAMEA2236465 | SAMEA2236465 | ERR422918 | GCA 900080275.1 | N/A |
| PDT000132812.2 | SAMEA2384818 | SAMEA2384818 | ERR554740 | GCA 900082535.1 | N/A |
| PDT000132813.2 | SAMEA2384813 | SAMEA2384813 | ERR554735 | GCA 900082515.1 | N/A |
| PDT000132815.2 | SAMEA2384868 | SAMEA2384868 | ERR554790 | GCA 900082905.1 | N/A |
| PDT000132816.2 | SAMEA2384345 | SAMEA2384345 | ERR554269 | GCA 900081545.1 | N/A |
| PDT000132818.2 | SAMEA2384877 | SAMEA2384877 | ERR554799 | GCA 900082985.1 | N/A |
| PDT000132819.2 | SAMEA2384804 | SAMEA2384804 | ERR554726 | GCA 900082455.1 | N/A |
| PDT000132822.2 | SAMEA2384835 | SAMEA2384835 | ERR554757 | GCA 900082675.1 | N/A |
| PDT000132823.2 | SAMEA2384439 | SAMEA2384439 | ERR554362 | GCA 900081785.1 | N/A |
| PDT000132824.2 | SAMEA2384796 | SAMEA2384796 | ERR554718 | GCA 900082665.1 | N/A |
| PDT000132825.2 | SAMEA2445580 | SAMEA2445580 | ERR573283 | GCA 900083215.1 | N/A |
| PDT000132826.2 | SAMEA2384797 | SAMEA2384797 | ERR554719 | GCA 900082725.1 | N/A |
| PDT000132827.2 | SAMEA2384834 | SAMEA2384834 | ERR554756 | GCA 900082635.1 | N/A |
| PDT000132828.2 | SAMEA2445501 | SAMEA2445501 | ERR573204 | GCA 900083095.1 | N/A |
| PDT000132831.2 | SAMEA2236410 | SAMEA2236410 | ERR422863 | GCA 900080685.1 | N/A |
| PDT000132832.2 | SAMEA2384872 | SAMEA2384872 | ERR554794 | GCA 900082945.1 | N/A |
| PDT000132833.2 | SAMEA2236418 | SAMEA2236418 | ERR422871 | GCA 900080325.1 | N/A |
| PDT000132834.2 | SAMEA2384587 | SAMEA2384587 | ERR554509 | GCA 900082195.1 | N/A |
| PDT000132835.2 | SAMEA2384559 | SAMEA2384559 | ERR554481 | GCA 900082105.1 | N/A |
| PDT000132836.2 | SAMEA2236416 | SAMEA2236416 | ERR422869 | GCA 900080655.1 | N/A |
| PDT000132837.2 | SAMEA2236430 | SAMEA2236430 | ERR422883 | GCA 900080395.1 | N/A |
| PDT000132839.2 | SAMEA2384651 | SAMEA2384651 | ERR554573 | GCA 900082325.1 | N/A |
| PDT000132840.2 | SAMEA2445533 | SAMEA2445533 | ERR573236 | GCA 900083145.1 | N/A |
| PDT000132841.2 | SAMEA2384108 | SAMEA2384108 | ERR540312 | GCA 900081125.1 | N/A |
| PDT000132842.2 | SAMEA2384479 | SAMEA2384479 | ERR554401 | GCA 900081875.1 | N/A |
| PDT000132843.2 | SAMEA2236478 | SAMEA2236478 | ERR423024 | GCA 900080725.1 | N/A |
| PDT000132844.2 | SAMEA2384522 | SAMEA2384522 | ERR554444 | GCA 900081945.1 | N/A |
| PDT000132845.2 | SAMEA2384510 | SAMEA2384510 | ERR554432 | GCA 900082025.1 | N/A |
| PDT000132846.2 | SAMEA2236459 | SAMEA2236459 | ERR422912 | GCA 900080355.1 | N/A |
| PDT000132847.2 | SAMEA2384827 | SAMEA2384827 | ERR554749 | GCA 900082585.1 | N/A |
| PDT000132848.2 | SAMEA2384863 | SAMEA2384863 | ERR554785 | GCA 900082875.1 | N/A |
| PDT000132849.2 | SAMEA2236436 | SAMEA2236436 | ERR422889 | GCA 900080535.1 | N/A |
| PDT000132850.2 | SAMEA2384361 | SAMEA2384361 | ERR554284 | GCA 900081615.1 | N/A |
| PDT000132852.2 | SAMEA2236489 | SAMEA2236489 | ERR423035 | GCA 900080785.1 | N/A |
| PDT000132854.2 | SAMEA2384527 | SAMEA2384527 | ERR554449 | GCA 900081975.1 | N/A |
| PDT000132856.2 | SAMEA2383985 | SAMEA2383985 | ERR540189 | GCA 900080885.1 | N/A |
| PDT000132860.2 | SAMEA2236443 | SAMEA2236443 | ERR422896 | GCA 900080485.1 | N/A |
| PDT000132861.2 | SAMEA2384281 | SAMEA2384281 | ERR554205 | GCA 900081405.1 | N/A |
| PDT000132862.2 | SAMEA2384408 | SAMEA2384408 | ERR554331 | GCA 900081735.1 | N/A |
| PDT000132864.2 | SAMEA2236448 | SAMEA2236448 | ERR422994 | GCA 900080675.1 | N/A |
| PDT000132865.2 | SAMEA2384597 | SAMEA2384597 | ERR554519 | GCA 900082235.1 | N/A |
| PDT000132866.2 | SAMEA2384612 | SAMEA2384612 | ERR554534 | GCA 900082265.1 | N/A |
| PDT000132867.2 | SAMEA2445497 | SAMEA2445497 | ERR573200 | GCA 900083085.1 | N/A |
| PDT000132868.2 | SAMEA2384297 | SAMEA2384297 | ERR554221 | GCA 900081425.1 | N/A |
| PDT000132869.2 | SAMEA2384448 | SAMEA2384448 | ERR554371 | GCA 900081805.1 | N/A |
| PDT000132870.2 | SAMEA2384602 | SAMEA2384602 | ERR554524 | GCA 900082255.1 | N/A |
| PDT000132871.2 | SAMEA2236467 | SAMEA2236467 | ERR422920 | GCA 900080525.1 | N/A |
| PDT000132872.2 | SAMEA2384814 | SAMEA2384814 | ERR554736 | GCA 900082525.1 | N/A |
| PDT000132873.2 | SAMEA2384866 | SAMEA2384866 | ERR554788 | GCA 900082895.1 | N/A |
| PDT000132874.2 | SAMEA2384313 | SAMEA2384313 | ERR554237 | GCA 900081455.1 | N/A |
| PDT000132875.2 | SAMEA2384312 | SAMEA2384312 | ERR554236 | GCA 900081445.1 | N/A |
| PDT000132876.2 | SAMEA2384289 | SAMEA2384289 | ERR554213 | GCA 900081415.1 | N/A |
| PDT000132877.2 | SAMEA2384884 | SAMEA2384884 | ERR554806 | GCA 900083025.1 | N/A |
| PDT000132878.2 | SAMEA2384885 | SAMEA2384885 | ERR554807 | GCA 900083015.1 | N/A |

|                |              |              |           |                 |     |
|----------------|--------------|--------------|-----------|-----------------|-----|
| PDT000132879.2 | SAMEA2236425 | SAMEA2236425 | ERR422971 | GCA 900080435.1 | N/A |
| PDT000132880.2 | SAMEA2236447 | SAMEA2236447 | ERR422900 | GCA 900080475.1 | N/A |
| PDT000132882.2 | SAMEA2384852 | SAMEA2384852 | ERR554774 | GCA 900082785.1 | N/A |
| PDT000132884.2 | SAMEA2384889 | SAMEA2384889 | ERR554811 | GCA 900083055.1 | N/A |
| PDT000132885.2 | SAMEA2236451 | SAMEA2236451 | ERR422997 | GCA 900080635.1 | N/A |
| PDT000132886.2 | SAMEA2384256 | SAMEA2384256 | ERR554180 | GCA 900081355.1 | N/A |
| PDT000132887.2 | SAMEA2384566 | SAMEA2384566 | ERR554488 | GCA 900082125.1 | N/A |
| PDT000132888.2 | SAMEA2384111 | SAMEA2384111 | ERR540315 | GCA 900081155.1 | N/A |
| PDT000132889.2 | SAMEA2384550 | SAMEA2384550 | ERR554472 | GCA 900082065.1 | N/A |
| PDT000132890.2 | SAMEA2384567 | SAMEA2384567 | ERR554489 | GCA 900082135.1 | N/A |
| PDT000132891.2 | SAMEA2383991 | SAMEA2383991 | ERR540195 | GCA 900080895.1 | N/A |
| PDT000132892.2 | SAMEA2384583 | SAMEA2384583 | ERR554505 | GCA 900082185.1 | N/A |
| PDT000132893.2 | SAMEA2384687 | SAMEA2384687 | ERR554609 | GCA 900082365.1 | N/A |
| PDT000132894.2 | SAMEA2384095 | SAMEA2384095 | ERR540299 | GCA 900081075.1 | N/A |
| PDT000132895.2 | SAMEA2384470 | SAMEA2384470 | ERR554392 | GCA 900081855.1 | N/A |
| PDT000132896.2 | SAMEA2384086 | SAMEA2384086 | ERR540290 | GCA 900081055.1 | N/A |
| PDT000132897.2 | SAMEA2384063 | SAMEA2384063 | ERR540267 | GCA 900080985.1 | N/A |
| PDT000132900.2 | SAMEA2384555 | SAMEA2384555 | ERR554477 | GCA 900082085.1 | N/A |
| PDT000132901.2 | SAMEA2384716 | SAMEA2384716 | ERR554638 | GCA 900082385.1 | N/A |
| PDT000132904.2 | SAMEA244517  | SAMEA244517  | ERR573220 | GCA 900083125.1 | N/A |
| PDT000132905.2 | SAMEA2236437 | SAMEA2236437 | ERR422983 | GCA 900080415.1 | N/A |
| PDT000132906.2 | SAMEA2236444 | SAMEA2236444 | ERR422990 | GCA 900080365.1 | N/A |
| PDT000132907.2 | SAMEA2384589 | SAMEA2384589 | ERR554511 | GCA 900082215.1 | N/A |
| PDT000132911.2 | SAMEA2384109 | SAMEA2384109 | ERR540313 | GCA 900081135.1 | N/A |
| PDT000132912.2 | SAMEA2384886 | SAMEA2384886 | ERR554808 | GCA 900083035.1 | N/A |
| PDT000132913.2 | SAMEA2445623 | SAMEA2445623 | ERR573326 | GCA 900083355.1 | N/A |
| PDT000132914.2 | SAMEA2236422 | SAMEA2236422 | ERR422968 | GCA 900080595.1 | N/A |
| PDT000132915.2 | SAMEA2384616 | SAMEA2384616 | ERR554538 | GCA 900082275.1 | N/A |
| PDT000132917.2 | SAMEA2384463 | SAMEA2384463 | ERR554385 | GCA 900081845.1 | N/A |
| PDT000132918.2 | SAMEA2384103 | SAMEA2384103 | ERR540307 | GCA 900081115.1 | N/A |
| PDT000132919.2 | SAMEA2383881 | SAMEA2383881 | ERR570532 | GCA 900083075.1 | N/A |
| PDT000132920.2 | SAMEA2384606 | SAMEA2384606 | ERR554528 | GCA 900082315.1 | N/A |
| PDT000132921.2 | SAMEA2384860 | SAMEA2384860 | ERR554782 | GCA 900082845.1 | N/A |
| PDT000132922.2 | SAMEA2384748 | SAMEA2384748 | ERR554670 | GCA 900082425.1 | N/A |
| PDT000132923.2 | SAMEA2384829 | SAMEA2384829 | ERR554751 | GCA 900082605.1 | N/A |
| PDT000132924.2 | SAMEA2236466 | SAMEA2236466 | ERR422919 | GCA 900080575.1 | N/A |
| PDT000132925.2 | SAMEA2384644 | SAMEA2384644 | ERR554566 | GCA 900082305.1 | N/A |
| PDT000132926.2 | SAMEA2384845 | SAMEA2384845 | ERR554767 | GCA 900082745.1 | N/A |
| PDT000132927.2 | SAMEA2236428 | SAMEA2236428 | ERR422974 | GCA 900080495.1 | N/A |
| PDT000132929.2 | SAMEA2236407 | SAMEA2236407 | ERR422860 | GCA 900080385.1 | N/A |
| PDT000132931.2 | SAMEA2236449 | SAMEA2236449 | ERR422995 | GCA 900080665.1 | N/A |
| PDT000132932.2 | SAMEA2384819 | SAMEA2384819 | ERR554741 | GCA 900082545.1 | N/A |
| PDT000132933.2 | SAMEA2063841 | SAMEA2063841 | ERR376900 | GCA 900080625.1 | N/A |
| PDT000132934.2 | SAMEA2236464 | SAMEA2236464 | ERR423010 | GCA 900080515.1 | N/A |
| PDT000132935.2 | SAMEA2236483 | SAMEA2236483 | ERR423029 | GCA 900080755.1 | N/A |
| PDT000132937.2 | SAMEA2384257 | SAMEA2384257 | ERR554181 | GCA 900081365.1 | N/A |
| PDT000132939.2 | SAMEA2384890 | SAMEA2384890 | ERR554812 | GCA 900083065.1 | N/A |
| PDT000132941.2 | SAMEA2384502 | SAMEA2384502 | ERR554424 | GCA 900081915.1 | N/A |
| PDT000132942.2 | SAMEA2384030 | SAMEA2384030 | ERR540234 | GCA 900080935.1 | N/A |
| PDT000132943.2 | SAMEA2384337 | SAMEA2384337 | ERR554261 | GCA 900081525.1 | N/A |
| PDT000132946.2 | SAMEA2384837 | SAMEA2384837 | ERR554759 | GCA 900082695.1 | N/A |
| PDT000132948.2 | SAMEA2383953 | SAMEA2383953 | ERR540157 | GCA 900080845.1 | N/A |
| PDT000132952.2 | SAMEA2384400 | SAMEA2384400 | ERR554323 | GCA 900081705.1 | N/A |
| PDT000132996.2 | SAMEA2445541 | SAMEA2445541 | ERR573244 | GCA 900083155.1 | N/A |
| PDT000133003.2 | SAMEA2384575 | SAMEA2384575 | ERR554497 | GCA 900082155.1 | N/A |
| PDT000164539.2 | SAMD00013708 | SAMD00013708 | DRR015575 | GCA 001748105.1 | N/A |
| PDT000164540.2 | SAMD00006357 | SAMD00006357 | DRR015576 | GCA 001748125.1 | N/A |
| PDT000164603.2 | SAMEA1708709 | SAMEA1708709 | ERR246598 | GCA 900098505.1 | N/A |
| PDT000164608.2 | SAMEA1708724 | SAMEA1708724 | ERR246595 | GCA 900098345.1 | N/A |
| PDT000164610.2 | SAMEA1708790 | SAMEA1708790 | ERR246616 | GCA 900098205.1 | N/A |
| PDT000164611.2 | SAMEA1708807 | SAMEA1708807 | ERR246637 | GCA 900098535.1 | N/A |
| PDT000164612.2 | SAMEA1708679 | SAMEA1708679 | ERR246619 | GCA 900098085.1 | N/A |
| PDT000164613.2 | SAMEA1708909 | SAMEA1708909 | ERR246663 | GCA 900098435.1 | N/A |
| PDT000164617.2 | SAMEA1708720 | SAMEA1708720 | ERR246596 | GCA 900098015.1 | N/A |
| PDT000164621.2 | SAMEA1709029 | SAMEA1709029 | ERR246601 | GCA 900098255.1 | N/A |
| PDT000164623.2 | SAMEA1929510 | SAMEA1929510 | ERR387094 | GCA 900098635.1 | N/A |
| PDT000164626.2 | SAMEA1708803 | SAMEA1708803 | ERR246609 | GCA 900098235.1 | N/A |
| PDT000164630.2 | SAMEA1708904 | SAMEA1708904 | ERR246662 | GCA 900098485.1 | N/A |

|                |              |              |           |                 |     |
|----------------|--------------|--------------|-----------|-----------------|-----|
| PDT000164634.2 | SAMEA1708715 | SAMEA1708715 | ERR246597 | GCA 900098355.1 | N/A |
| PDT000164636.2 | SAMEA1708737 | SAMEA1708737 | ERR246640 | GCA 900098715.1 | N/A |
| PDT000164637.2 | SAMEA2298729 | SAMEA2298729 | ERR505367 | GCA 900097545.1 | N/A |
| PDT000164638.2 | SAMEA2298708 | SAMEA2298708 | ERR505346 | GCA 900097825.1 | N/A |
| PDT000164641.2 | SAMEA1708691 | SAMEA1708691 | ERR246673 | GCA 900098285.1 | N/A |
| PDT000164642.2 | SAMEA1708908 | SAMEA1708908 | ERR246655 | GCA 900098335.1 | N/A |
| PDT000164643.2 | SAMEA2298743 | SAMEA2298743 | ERR490615 | GCA 900097675.1 | N/A |
| PDT000164646.2 | SAMEA1708902 | SAMEA1708902 | ERR246654 | GCA 900098685.1 | N/A |
| PDT000164648.2 | SAMEA3109326 | SAMEA3109326 | ERR829976 | GCA 900097455.1 | N/A |
| PDT000164652.2 | SAMEA1708926 | SAMEA1708926 | ERR246666 | GCA 900097985.1 | N/A |
| PDT000164655.2 | SAMEA2298707 | SAMEA2298707 | ERR490579 | GCA 900097815.1 | N/A |
| PDT000164656.2 | SAMEA3109321 | SAMEA3109321 | ERR829971 | GCA 900097325.1 | N/A |
| PDT000164657.2 | SAMEA3109329 | SAMEA3109329 | ERR829979 | GCA 900097555.1 | N/A |
| PDT000164658.2 | SAMEA2298735 | SAMEA2298735 | ERR505373 | GCA 900097855.1 | N/A |
| PDT000164661.2 | SAMEA1709009 | SAMEA1709009 | ERR246626 | GCA 900098155.1 | N/A |
| PDT000164662.2 | SAMEA1708748 | SAMEA1708748 | ERR246642 | GCA 900098695.1 | N/A |
| PDT000164664.2 | SAMEA1709011 | SAMEA1709011 | ERR246625 | GCA 900098305.1 | N/A |
| PDT000164665.2 | SAMEA1708824 | SAMEA1708824 | ERR246610 | GCA 900098075.1 | N/A |
| PDT000164669.2 | SAMEA1709026 | SAMEA1709026 | ERR246622 | GCA 900098605.1 | N/A |
| PDT000164670.2 | SAMEA1708766 | SAMEA1708766 | ERR246617 | GCA 900098525.1 | N/A |
| PDT000164673.2 | SAMEA1708683 | SAMEA1708683 | ERR246670 | GCA 900098455.1 | N/A |
| PDT000164676.2 | SAMEA2298720 | SAMEA2298720 | ERR490592 | GCA 900097305.1 | N/A |
| PDT000164690.2 | SAMEA3109331 | SAMEA3109331 | ERR829981 | GCA 900097485.1 | N/A |
| PDT000164692.2 | SAMEA1709037 | SAMEA1709037 | ERR246620 | GCA 900098095.1 | N/A |
| PDT000164694.2 | SAMEA2298725 | SAMEA2298725 | ERR490597 | GCA 900097865.1 | N/A |
| PDT000164698.2 | SAMEA1709003 | SAMEA1709003 | ERR246599 | GCA 900098225.1 | N/A |
| PDT000164699.2 | SAMEA1709002 | SAMEA1709002 | ERR246627 | GCA 900098175.1 | N/A |
| PDT000164702.2 | SAMEA2298706 | SAMEA2298706 | ERR505344 | GCA 900097605.1 | N/A |
| PDT000164703.2 | SAMEA1708789 | SAMEA1708789 | ERR246594 | GCA 900098315.1 | N/A |
| PDT000164704.2 | SAMEA2298747 | SAMEA2298747 | ERR490619 | GCA 900097355.1 | N/A |
| PDT000164708.2 | SAMEA2298756 | SAMEA2298756 | ERR505394 | GCA 900097835.1 | N/A |
| PDT000164713.2 | SAMEA1708785 | SAMEA1708785 | ERR246593 | GCA 900098625.1 | N/A |
| PDT000164717.2 | SAMEA2298754 | SAMEA2298754 | ERR505392 | GCA 900097915.1 | N/A |
| PDT000164718.2 | SAMEA2298732 | SAMEA2298732 | ERR505370 | GCA 900097785.1 | N/A |
| PDT000164719.2 | SAMEA1708819 | SAMEA1708819 | ERR246611 | GCA 900098375.1 | N/A |
| PDT000164721.2 | SAMEA1708945 | SAMEA1708945 | ERR246664 | GCA 900098125.1 | N/A |
| PDT000164723.2 | SAMEA1709016 | SAMEA1709016 | ERR246624 | GCA 900098705.1 | N/A |
| PDT000164725.2 | SAMEA2298700 | SAMEA2298700 | ERR505338 | GCA 900097765.1 | N/A |
| PDT000164727.2 | SAMEA1708758 | SAMEA1708758 | ERR246643 | GCA 900098215.1 | N/A |
| PDT000164728.2 | SAMEA1708953 | SAMEA1708953 | ERR246665 | GCA 900098445.1 | N/A |
| PDT000164731.2 | SAMEA2298724 | SAMEA2298724 | ERR505362 | GCA 900097705.1 | N/A |
| PDT000164732.2 | SAMEA1708930 | SAMEA1708930 | ERR246667 | GCA 900098145.1 | N/A |
| PDT000164734.2 | SAMEA3109332 | SAMEA3109332 | ERR829982 | GCA 900097445.1 | N/A |
| PDT000164735.2 | SAMEA1708680 | SAMEA1708680 | ERR246671 | GCA 900098465.1 | N/A |
| PDT000164736.2 | SAMEA1709015 | SAMEA1709015 | ERR246603 | GCA 900098045.1 | N/A |
| PDT000164740.2 | SAMEA1708868 | SAMEA1708868 | ERR246633 | GCA 900098325.1 | N/A |
| PDT000164741.2 | SAMEA2298751 | SAMEA2298751 | ERR490623 | GCA 900097925.1 | N/A |
| PDT000164744.2 | SAMEA2298718 | SAMEA2298718 | ERR505356 | GCA 900097525.1 | N/A |
| PDT000164747.2 | SAMEA1708896 | SAMEA1708896 | ERR246629 | GCA 900098395.1 | N/A |
| PDT000164749.2 | SAMEA2298710 | SAMEA2298710 | ERR490582 | GCA 900097755.1 | N/A |
| PDT000164750.2 | SAMEA1708859 | SAMEA1708859 | ERR246632 | GCA 900098135.1 | N/A |
| PDT000164756.2 | SAMEA1708861 | SAMEA1708861 | ERR246606 | GCA 900098265.1 | N/A |
| PDT000164759.2 | SAMEA1708883 | SAMEA1708883 | ERR246631 | GCA 900098575.1 | N/A |
| PDT000164769.2 | SAMEA1708947 | SAMEA1708947 | ERR246657 | GCA 900098515.1 | N/A |
| PDT000164770.2 | SAMEA2298716 | SAMEA2298716 | ERR490588 | GCA 900097285.1 | N/A |
| PDT000164771.2 | SAMEA1709031 | SAMEA1709031 | ERR246600 | GCA 900098035.1 | N/A |
| PDT000164779.2 | SAMEA1708704 | SAMEA1708704 | ERR246675 | GCA 900098115.1 | N/A |
| PDT000164791.2 | SAMEA2298713 | SAMEA2298713 | ERR505351 | GCA 900097475.1 | N/A |
| PDT000164792.2 | SAMEA1708855 | SAMEA1708855 | ERR246608 | GCA 900098275.1 | N/A |
| PDT000164798.2 | SAMEA1708658 | SAMEA1708658 | ERR246645 | GCA 900098475.1 | N/A |
| PDT000164800.2 | SAMEA1708977 | SAMEA1708977 | ERR246650 | GCA 900098565.1 | N/A |
| PDT000164802.2 | SAMEA3109322 | SAMEA3109322 | ERR829972 | GCA 900097505.1 | N/A |
| PDT000164804.2 | SAMEA2298744 | SAMEA2298744 | ERR505382 | GCA 900097715.1 | N/A |
| PDT000164806.2 | SAMEA3109336 | SAMEA3109336 | ERR829986 | GCA 900097725.1 | N/A |
| PDT000164810.2 | SAMEA1708688 | SAMEA1708688 | ERR246672 | GCA 900098595.1 | N/A |
| PDT000164815.2 | SAMEA2298740 | SAMEA2298740 | ERR505378 | GCA 900097905.1 | N/A |
| PDT000164817.2 | SAMEA3109333 | SAMEA3109333 | ERR829983 | GCA 900097665.1 | N/A |
| PDT000164819.2 | SAMEA1708769 | SAMEA1708769 | ERR246618 | GCA 900098725.1 | N/A |

|                |              |              |            |                 |     |
|----------------|--------------|--------------|------------|-----------------|-----|
| PDT000164822.2 | SAMEA1708813 | SAMEA1708813 | ERR246612  | GCA 900098005.1 | N/A |
| PDT000164830.2 | SAMEA2298758 | SAMEA2298758 | ERR490630  | GCA 900097895.1 | N/A |
| PDT000164836.2 | SAMEA1708914 | SAMEA1708914 | ERR246659  | GCA 900098025.1 | N/A |
| PDT000164839.2 | SAMEA1708877 | SAMEA1708877 | ERR246630  | GCA 900098545.1 | N/A |
| PDT000164840.2 | SAMEA1708910 | SAMEA1708910 | ERR246656  | GCA 900098195.1 | N/A |
| PDT000164842.2 | SAMEA1708918 | SAMEA1708918 | ERR246660  | GCA 900098665.1 | N/A |
| PDT000164844.2 | SAMEA1708730 | SAMEA1708730 | ERR246639  | GCA 900098405.1 | N/A |
| PDT000164849.2 | SAMEA3109318 | SAMEA3109318 | ERR829968  | GCA 900097385.1 | N/A |
| PDT000164851.2 | SAMEA1708919 | SAMEA1708919 | ERR246653  | GCA 900098165.1 | N/A |
| PDT000164852.2 | SAMEA1708797 | SAMEA1708797 | ERR246615  | GCA 900098385.1 | N/A |
| PDT000164853.2 | SAMEA1708869 | SAMEA1708869 | ERR246605  | GCA 900098065.1 | N/A |
| PDT000164855.2 | SAMEA1708801 | SAMEA1708801 | ERR246638  | GCA 900098245.1 | N/A |
| PDT000164856.2 | SAMEA1709023 | SAMEA1709023 | ERR246623  | GCA 900098295.1 | N/A |
| PDT000164859.2 | SAMEA1709025 | SAMEA1709025 | ERR246604  | GCA 900098055.1 | N/A |
| PDT000164860.2 | SAMEA2298705 | SAMEA2298705 | ERR505343  | GCA 900097645.1 | N/A |
| PDT000164863.2 | SAMEA1709034 | SAMEA1709034 | ERR246602  | GCA 900098365.1 | N/A |
| PDT000164866.2 | SAMEA1708981 | SAMEA1708981 | ERR246649  | GCA 900098555.1 | N/A |
| PDT000164873.2 | SAMEA1708940 | SAMEA1708940 | ERR246668  | GCA 900098495.1 | N/A |
| PDT000164879.2 | SAMEA1708955 | SAMEA1708955 | ERR246658  | GCA 900098585.1 | N/A |
| PDT000164880.2 | SAMEA2298722 | SAMEA2298722 | ERR505360  | GCA 900097805.1 | N/A |
| PDT000164881.2 | SAMEA3109330 | SAMEA3109330 | ERR829980  | GCA 900097405.1 | N/A |
| PDT000164883.2 | SAMEA2298755 | SAMEA2298755 | ERR505393  | GCA 900097685.1 | N/A |
| PDT000164888.2 | SAMEA1708738 | SAMEA1708738 | ERR246641  | GCA 900098415.1 | N/A |
| PDT000164889.2 | SAMEA1708671 | SAMEA1708671 | ERR246647  | GCA 900098425.1 | N/A |
| PDT000164890.2 | SAMEA1708992 | SAMEA1708992 | ERR246628  | GCA 900098105.1 | N/A |
| PDT000164894.2 | SAMEA2298730 | SAMEA2298730 | ERR505368  | GCA 900097745.1 | N/A |
| PDT000165015.2 | SAMEA2298711 | SAMEA2298711 | ERR505349  | GCA 900097885.1 | N/A |
| PDT000165433.2 | SAMN04477633 | SAMN04477633 | SRR3150822 | GCA 001811775.1 | N/A |
| PDT000165512.2 | SAMN04480071 | SAMN04480071 | SRR3151998 | GCA 001813355.1 | N/A |
| PDT000165601.2 | SAMN04480425 | SAMN04480425 | SRR3152117 | GCA 001815105.1 | N/A |
| PDT000165621.2 | SAMN04480445 | SAMN04480445 | SRR3152135 | GCA 001815475.1 | N/A |
| PDT000165639.2 | SAMN04498905 | SAMN04498905 | SRR3178075 | GCA 001815835.1 | N/A |
| PDT000165703.2 | SAMN04498596 | SAMN04498596 | SRR3177813 | GCA 001836085.1 | N/A |
| PDT000165720.2 | SAMN04498618 | SAMN04498618 | SRR3177838 | GCA 001836385.1 | N/A |
| PDT000165729.2 | SAMN04498580 | SAMN04498580 | SRR3177788 | GCA 001836595.1 | N/A |
| PDT000165838.2 | SAMN04498857 | SAMN04498857 | SRR3178003 | GCA 001838745.1 | N/A |
| PDT000165841.2 | SAMN04498865 | SAMN04498865 | SRR3177963 | GCA 001838805.1 | N/A |
| PDT000165844.2 | SAMN04498860 | SAMN04498860 | SRR3177960 | GCA 001838865.1 | N/A |
| PDT000165846.2 | SAMN04498878 | SAMN04498878 | SRR3177977 | GCA 001838895.1 | N/A |
| PDT000165848.2 | SAMN04498904 | SAMN04498904 | SRR3177983 | GCA 001838935.1 | N/A |
| PDT000165850.2 | SAMN04498871 | SAMN04498871 | SRR3177967 | GCA 001838975.1 | N/A |
| PDT000165851.2 | SAMN04498903 | SAMN04498903 | SRR3178005 | GCA 001839005.1 | N/A |
| PDT000165852.2 | SAMN04498880 | SAMN04498880 | SRR3177979 | GCA 001839035.1 | N/A |
| PDT000165853.2 | SAMN04498870 | SAMN04498870 | SRR3177969 | GCA 001839025.1 | N/A |
| PDT000165854.2 | SAMN04498872 | SAMN04498872 | SRR3177970 | GCA 001839065.1 | N/A |
| PDT000165859.2 | SAMN04498875 | SAMN04498875 | SRR3177971 | GCA 001839155.1 | N/A |
| PDT000165861.2 | SAMN04498884 | SAMN04498884 | SRR3177997 | GCA 001839195.1 | N/A |
| PDT000165862.2 | SAMN04498876 | SAMN04498876 | SRR3177972 | GCA 001839225.1 | N/A |
| PDT000165864.2 | SAMN04498887 | SAMN04498887 | SRR3177982 | GCA 001839275.1 | N/A |
| PDT000165865.2 | SAMN04498889 | SAMN04498889 | SRR3177986 | GCA 001839285.1 | N/A |
| PDT000165870.2 | SAMN04498892 | SAMN04498892 | SRR3177988 | GCA 001839365.1 | N/A |
| PDT000165874.2 | SAMN04498891 | SAMN04498891 | SRR3177991 | GCA 001839445.1 | N/A |
| PDT000165875.2 | SAMN04498902 | SAMN04498902 | SRR3178006 | GCA 001839495.1 | N/A |
| PDT000165877.2 | SAMN04498894 | SAMN04498894 | SRR3177993 | GCA 001839485.1 | N/A |
| PDT000166643.2 | SAMEA2445557 | SAMEA2445557 | ERR573260  | GCA 900083185.1 | N/A |
| PDT000166644.2 | SAMEA2445584 | SAMEA2445584 | ERR573287  | GCA 900083305.1 | N/A |
| PDT000166645.2 | SAMEA2445572 | SAMEA2445572 | ERR573275  | GCA 900083205.1 | N/A |
| PDT000166646.2 | SAMEA2445607 | SAMEA2445607 | ERR573310  | GCA 900083285.1 | N/A |
| PDT000166648.2 | SAMEA2445672 | SAMEA2445672 | ERR573374  | GCA 900083505.1 | N/A |
| PDT000166650.2 | SAMEA2445615 | SAMEA2445615 | ERR573318  | GCA 900083335.1 | N/A |
| PDT000166651.2 | SAMEA2445631 | SAMEA2445631 | ERR573334  | GCA 900083385.1 | N/A |
| PDT000166653.2 | SAMEA2445663 | SAMEA2445663 | ERR573366  | GCA 900083465.1 | N/A |
| PDT000166654.2 | SAMEA2445640 | SAMEA2445640 | ERR573343  | GCA 900083405.1 | N/A |
| PDT000166655.2 | SAMEA2445647 | SAMEA2445647 | ERR573350  | GCA 900083425.1 | N/A |
| PDT000166657.2 | SAMEA2445600 | SAMEA2445600 | ERR573303  | GCA 900083255.1 | N/A |
| PDT000166659.2 | SAMEA2445670 | SAMEA2445670 | ERR573372  | GCA 900083475.1 | N/A |
| PDT000166660.2 | SAMEA2445630 | SAMEA2445630 | ERR573333  | GCA 900083375.1 | N/A |
| PDT000166661.2 | SAMEA2445646 | SAMEA2445646 | ERR573349  | GCA 900083415.1 | N/A |

|                |              |              |            |                 |     |
|----------------|--------------|--------------|------------|-----------------|-----|
| PDT000166662.2 | SAMEA2445639 | SAMEA2445639 | ERR573342  | GCA 900083365.1 | N/A |
| PDT000166663.2 | SAMEA2445624 | SAMEA2445624 | ERR573327  | GCA 900083395.1 | N/A |
| PDT000166664.2 | SAMEA2445671 | SAMEA2445671 | ERR573373  | GCA 900083495.1 | N/A |
| PDT000166665.2 | SAMEA2445654 | SAMEA2445654 | ERR573357  | GCA 900083445.1 | N/A |
| PDT000166667.2 | SAMEA2445648 | SAMEA2445648 | ERR573351  | GCA 900083435.1 | N/A |
| PDT000166668.2 | SAMEA2445656 | SAMEA2445656 | ERR573359  | GCA 900083455.1 | N/A |
| PDT000166669.2 | SAMEA2445608 | SAMEA2445608 | ERR573311  | GCA 900083295.1 | N/A |
| PDT000168658.2 | SAMN06124916 | SAMN06124916 | SRR5093706 | GCA 015610295.1 | N/A |
| PDT000170432.2 | SAMEA3449026 | SAMEA3449026 | ERR1069879 | GCA 900125065.1 | N/A |
| PDT000170439.2 | SAMEA3448895 | SAMEA3448895 | ERR1069982 | GCA 900125845.1 | N/A |
| PDT000170445.2 | SAMEA3449037 | SAMEA3449037 | ERR1069890 | GCA 900125155.1 | N/A |
| PDT000170449.2 | SAMEA3449398 | SAMEA3449398 | ERR1069961 | GCA 900125775.1 | N/A |
| PDT000170452.2 | SAMEA3448955 | SAMEA3448955 | ERR1070042 | GCA 900126375.1 | N/A |
| PDT000170456.2 | SAMEA3448886 | SAMEA3448886 | ERR1069973 | GCA 900126065.1 | N/A |
| PDT000170461.2 | SAMEA3449401 | SAMEA3449401 | ERR1069964 | GCA 900125795.1 | N/A |
| PDT000170468.2 | SAMEA3448854 | SAMEA3448854 | ERR1069931 | GCA 900125535.1 | N/A |
| PDT000170474.2 | SAMEA3448880 | SAMEA3448880 | ERR1069957 | GCA 900125725.1 | N/A |
| PDT000170476.2 | SAMEA3448945 | SAMEA3448945 | ERR1070032 | GCA 900126285.1 | N/A |
| PDT000170479.2 | SAMEA3448964 | SAMEA3448964 | ERR1070051 | GCA 900126445.1 | N/A |
| PDT000170481.2 | SAMEA3448913 | SAMEA3448913 | ERR1070000 | GCA 900125985.1 | N/A |
| PDT000170483.2 | SAMEA3449031 | SAMEA3449031 | ERR1069884 | GCA 900125115.1 | N/A |
| PDT000170484.2 | SAMEA3449017 | SAMEA3449017 | ERR1069870 | GCA 900124975.1 | N/A |
| PDT000170487.2 | SAMEA3448881 | SAMEA3448881 | ERR1069958 | GCA 900125735.1 | N/A |
| PDT000170488.2 | SAMEA3448890 | SAMEA3448890 | ERR1069977 | GCA 900126415.1 | N/A |
| PDT000170490.2 | SAMEA3448847 | SAMEA3448847 | ERR1069924 | GCA 900125475.1 | N/A |
| PDT000170497.2 | SAMEA3448991 | SAMEA3448991 | ERR1069844 | GCA 900124755.1 | N/A |
| PDT000170502.2 | SAMEA3448923 | SAMEA3448923 | ERR1070010 | GCA 900126085.1 | N/A |
| PDT000170507.2 | SAMEA3448932 | SAMEA3448932 | ERR1070019 | GCA 900126155.1 | N/A |
| PDT000170508.2 | SAMEA3448972 | SAMEA3448972 | ERR1069825 | GCA 900124815.1 | N/A |
| PDT000170509.2 | SAMEA3449043 | SAMEA3449043 | ERR1069896 | GCA 900125225.1 | N/A |
| PDT000170513.2 | SAMEA3449063 | SAMEA3449063 | ERR1070063 | GCA 900126925.1 | N/A |
| PDT000170522.2 | SAMEA3448838 | SAMEA3448838 | ERR1069915 | GCA 900125395.1 | N/A |
| PDT000170523.2 | SAMEA3448859 | SAMEA3448859 | ERR1069936 | GCA 900125575.1 | N/A |
| PDT000170525.2 | SAMEA3449020 | SAMEA3449020 | ERR1069873 | GCA 900125015.1 | N/A |
| PDT000170533.2 | SAMEA3448857 | SAMEA3448857 | ERR1069934 | GCA 900125545.1 | N/A |
| PDT000170545.2 | SAMEA3449143 | SAMEA3449143 | ERR1070143 | GCA 900127095.1 | N/A |
| PDT000170546.2 | SAMEA3448959 | SAMEA3448959 | ERR1070046 | GCA 900126405.1 | N/A |
| PDT000170547.2 | SAMEA3449397 | SAMEA3449397 | ERR1069960 | GCA 900125745.1 | N/A |
| PDT000170557.2 | SAMEA3449000 | SAMEA3449000 | ERR1069853 | GCA 900124835.1 | N/A |
| PDT000170568.2 | SAMEA3449056 | SAMEA3449056 | ERR1069909 | GCA 900125345.1 | N/A |
| PDT000170570.2 | SAMEA3448846 | SAMEA3448846 | ERR1069923 | GCA 900125465.1 | N/A |
| PDT000170577.2 | SAMEA3449016 | SAMEA3449016 | ERR1069869 | GCA 900124965.1 | N/A |
| PDT000170580.2 | SAMEA3449064 | SAMEA3449064 | ERR1070064 | GCA 900127015.1 | N/A |
| PDT000170581.2 | SAMEA3448930 | SAMEA3448930 | ERR1070017 | GCA 900126135.1 | N/A |
| PDT000170582.2 | SAMEA3448971 | SAMEA3448971 | ERR1069824 | GCA 900124725.1 | N/A |
| PDT000170584.2 | SAMEA3448861 | SAMEA3448861 | ERR1069938 | GCA 900125585.1 | N/A |
| PDT000170587.2 | SAMEA3448965 | SAMEA3448965 | ERR1070052 | GCA 900126455.1 | N/A |
| PDT000170596.2 | SAMEA3449067 | SAMEA3449067 | ERR1070067 | GCA 900126515.1 | N/A |
| PDT000170600.2 | SAMEA3448853 | SAMEA3448853 | ERR1069930 | GCA 900125525.1 | N/A |
| PDT000170601.2 | SAMEA3449024 | SAMEA3449024 | ERR1069877 | GCA 900125055.1 | N/A |
| PDT000170602.2 | SAMEA3448944 | SAMEA3448944 | ERR1070031 | GCA 900126275.1 | N/A |
| PDT000170603.2 | SAMEA3448952 | SAMEA3448952 | ERR1070039 | GCA 900126345.1 | N/A |
| PDT000170605.2 | SAMEA3449011 | SAMEA3449011 | ERR1069864 | GCA 900124925.1 | N/A |
| PDT000170606.2 | SAMEA3448884 | SAMEA3448884 | ERR1069971 | GCA 900125905.1 | N/A |
| PDT000170607.2 | SAMEA3448957 | SAMEA3448957 | ERR1070044 | GCA 900126395.1 | N/A |
| PDT000170609.2 | SAMEA3449044 | SAMEA3449044 | ERR1069897 | GCA 900125235.1 | N/A |
| PDT000170610.2 | SAMEA3449039 | SAMEA3449039 | ERR1069892 | GCA 900125185.1 | N/A |
| PDT000170612.2 | SAMEA3448922 | SAMEA3448922 | ERR1070009 | GCA 900126075.1 | N/A |
| PDT000170614.2 | SAMEA3448996 | SAMEA3448996 | ERR1069849 | GCA 900124795.1 | N/A |
| PDT000170623.2 | SAMEA3449046 | SAMEA3449046 | ERR1069899 | GCA 900125255.1 | N/A |
| PDT000170624.2 | SAMEA3449013 | SAMEA3449013 | ERR1069866 | GCA 900124935.1 | N/A |
| PDT000170628.2 | SAMEA3448883 | SAMEA3448883 | ERR1069970 | GCA 900125835.1 | N/A |
| PDT000170631.2 | SAMEA3448936 | SAMEA3448936 | ERR1070023 | GCA 900126195.1 | N/A |
| PDT000170634.2 | SAMEA3449014 | SAMEA3449014 | ERR1069867 | GCA 900124945.1 | N/A |
| PDT000170636.2 | SAMEA3448841 | SAMEA3448841 | ERR1069918 | GCA 900125425.1 | N/A |
| PDT000170639.2 | SAMEA3448999 | SAMEA3448999 | ERR1069852 | GCA 900124825.1 | N/A |
| PDT000170642.2 | SAMEA3448962 | SAMEA3448962 | ERR1070049 | GCA 900126425.1 | N/A |
| PDT000170643.2 | SAMEA3448994 | SAMEA3448994 | ERR1069847 | GCA 900124785.1 | N/A |

|                |              |              |            |                 |     |
|----------------|--------------|--------------|------------|-----------------|-----|
| PDT000170649.2 | SAMEA3449009 | SAMEA3449009 | ERR1069862 | GCA 900124905.1 | N/A |
| PDT000170651.2 | SAMEA3448839 | SAMEA3448839 | ERR1069916 | GCA 900125405.1 | N/A |
| PDT000170653.2 | SAMEA3448852 | SAMEA3448852 | ERR1069929 | GCA 900125505.1 | N/A |
| PDT000170655.2 | SAMEA3449028 | SAMEA3449028 | ERR1069881 | GCA 900125075.1 | N/A |
| PDT000170660.2 | SAMEA3448942 | SAMEA3448942 | ERR1070029 | GCA 900126255.1 | N/A |
| PDT000170661.2 | SAMEA3449055 | SAMEA3449055 | ERR1069908 | GCA 900125335.1 | N/A |
| PDT000170663.2 | SAMEA3449049 | SAMEA3449049 | ERR1069902 | GCA 900125285.1 | N/A |
| PDT000170664.2 | SAMEA3448856 | SAMEA3448856 | ERR1069933 | GCA 900125555.1 | N/A |
| PDT000170666.2 | SAMEA3448976 | SAMEA3448976 | ERR1069829 | GCA 900125175.1 | N/A |
| PDT000170669.2 | SAMEA3448921 | SAMEA3448921 | ERR1070008 | GCA 900126055.1 | N/A |
| PDT000170681.2 | SAMEA3449103 | SAMEA3449103 | ERR1070103 | GCA 900126755.1 | N/A |
| PDT000170682.2 | SAMEA3448954 | SAMEA3448954 | ERR1070041 | GCA 900126365.1 | N/A |
| PDT000170683.2 | SAMEA3449396 | SAMEA3449396 | ERR1069959 | GCA 900125755.1 | N/A |
| PDT000170684.2 | SAMEA3448862 | SAMEA3448862 | ERR1069939 | GCA 900125595.1 | N/A |
| PDT000170690.2 | SAMEA3448953 | SAMEA3448953 | ERR1070040 | GCA 900126355.1 | N/A |
| PDT000170691.2 | SAMEA3448888 | SAMEA3448888 | ERR1069975 | GCA 900126245.1 | N/A |
| PDT000170695.2 | SAMEA3449030 | SAMEA3449030 | ERR1069883 | GCA 900125105.1 | N/A |
| PDT000170699.2 | SAMEA3448981 | SAMEA3448981 | ERR1069834 | GCA 900124655.1 | N/A |
| PDT000170700.2 | SAMEA3448948 | SAMEA3448948 | ERR1070035 | GCA 900126315.1 | N/A |
| PDT000170704.2 | SAMEA3449062 | SAMEA3449062 | ERR1070062 | GCA 900126845.1 | N/A |
| PDT000170706.2 | SAMEA3448891 | SAMEA3448891 | ERR1069978 | GCA 900126495.1 | N/A |
| PDT000170710.2 | SAMEA3448939 | SAMEA3448939 | ERR1070026 | GCA 900126215.1 | N/A |
| PDT000170715.2 | SAMEA3448966 | SAMEA3448966 | ERR1070053 | GCA 900126465.1 | N/A |
| PDT000170716.2 | SAMEA3448912 | SAMEA3448912 | ERR1069999 | GCA 900125975.1 | N/A |
| PDT000170720.2 | SAMEA3449040 | SAMEA3449040 | ERR1069893 | GCA 900125195.1 | N/A |
| PDT000170722.2 | SAMEA3448911 | SAMEA3448911 | ERR1069998 | GCA 900125955.1 | N/A |
| PDT000170729.2 | SAMEA3448985 | SAMEA3448985 | ERR1069838 | GCA 900124695.1 | N/A |
| PDT000170733.2 | SAMEA3449068 | SAMEA3449068 | ERR1070068 | GCA 900126535.1 | N/A |
| PDT000170743.2 | SAMEA3449035 | SAMEA3449035 | ERR1069888 | GCA 900125165.1 | N/A |
| PDT000170744.2 | SAMEA3448906 | SAMEA3448906 | ERR1069993 | GCA 900125915.1 | N/A |
| PDT000170752.2 | SAMEA3448845 | SAMEA3448845 | ERR1069922 | GCA 900125455.1 | N/A |
| PDT000170754.2 | SAMEA3448855 | SAMEA3448855 | ERR1069932 | GCA 900125515.1 | N/A |
| PDT000170758.2 | SAMEA3448973 | SAMEA3448973 | ERR1069826 | GCA 900124895.1 | N/A |
| PDT000170762.2 | SAMEA3449400 | SAMEA3449400 | ERR1069963 | GCA 900125785.1 | N/A |
| PDT000170763.2 | SAMEA3448899 | SAMEA3448899 | ERR1069986 | GCA 900125875.1 | N/A |
| PDT000170772.2 | SAMEA3449008 | SAMEA3449008 | ERR1069861 | GCA 900124885.1 | N/A |
| PDT000170777.2 | SAMEA3448924 | SAMEA3448924 | ERR1070011 | GCA 900126095.1 | N/A |
| PDT000170778.2 | SAMEA3449399 | SAMEA3449399 | ERR1069962 | GCA 900125765.1 | N/A |
| PDT000170782.2 | SAMEA3448975 | SAMEA3448975 | ERR1069828 | GCA 900125095.1 | N/A |
| PDT000170784.2 | SAMEA3448974 | SAMEA3448974 | ERR1069827 | GCA 900124995.1 | N/A |
| PDT000170787.2 | SAMEA3448947 | SAMEA3448947 | ERR1070034 | GCA 900126305.1 | N/A |
| PDT000170788.2 | SAMEA3448989 | SAMEA3448989 | ERR1069842 | GCA 900124735.1 | N/A |
| PDT000170794.2 | SAMEA3448946 | SAMEA3448946 | ERR1070033 | GCA 900126295.1 | N/A |
| PDT000170795.2 | SAMEA3448866 | SAMEA3448866 | ERR1069943 | GCA 900125625.1 | N/A |
| PDT000170796.2 | SAMEA3448956 | SAMEA3448956 | ERR1070043 | GCA 900126385.1 | N/A |
| PDT000170800.2 | SAMEA3448925 | SAMEA3448925 | ERR1070012 | GCA 900126105.1 | N/A |
| PDT000170802.2 | SAMEA3448940 | SAMEA3448940 | ERR1070027 | GCA 900126225.1 | N/A |
| PDT000170808.2 | SAMEA3449059 | SAMEA3449059 | ERR1070059 | GCA 900126635.1 | N/A |
| PDT000170813.2 | SAMEA3448878 | SAMEA3448878 | ERR1069955 | GCA 900125705.1 | N/A |
| PDT000170814.2 | SAMEA3448917 | SAMEA3448917 | ERR1070004 | GCA 900126025.1 | N/A |
| PDT000170816.2 | SAMEA3448910 | SAMEA3448910 | ERR1069997 | GCA 900125945.1 | N/A |
| PDT000170818.2 | SAMEA3448918 | SAMEA3448918 | ERR1070005 | GCA 900126035.1 | N/A |
| PDT000170820.2 | SAMEA3448875 | SAMEA3448875 | ERR1069952 | GCA 900125685.1 | N/A |
| PDT000170822.2 | SAMEA3448871 | SAMEA3448871 | ERR1069948 | GCA 900125665.1 | N/A |
| PDT000170823.2 | SAMEA3448865 | SAMEA3448865 | ERR1069942 | GCA 900125615.1 | N/A |
| PDT000170828.2 | SAMEA3449144 | SAMEA3449144 | ERR1070144 | GCA 900127105.1 | N/A |
| PDT000170834.2 | SAMEA3448869 | SAMEA3448869 | ERR1069946 | GCA 900125645.1 | N/A |
| PDT000170842.2 | SAMEA3448900 | SAMEA3448900 | ERR1069987 | GCA 900125885.1 | N/A |
| PDT000170848.2 | SAMEA3448870 | SAMEA3448870 | ERR1069947 | GCA 900125655.1 | N/A |
| PDT000170864.2 | SAMEA3449057 | SAMEA3449057 | ERR1070057 | GCA 900126505.1 | N/A |
| PDT000170873.2 | SAMEA3448901 | SAMEA3448901 | ERR1069988 | GCA 900125895.1 | N/A |
| PDT000170874.2 | SAMEA3449023 | SAMEA3449023 | ERR1069876 | GCA 900125045.1 | N/A |
| PDT000170880.2 | SAMEA3448926 | SAMEA3448926 | ERR1070013 | GCA 900126115.1 | N/A |
| PDT000170886.2 | SAMEA3449058 | SAMEA3449058 | ERR1070058 | GCA 900126575.1 | N/A |
| PDT000170887.2 | SAMEA3448983 | SAMEA3448983 | ERR1069836 | GCA 900124675.1 | N/A |
| PDT000170888.2 | SAMEA3448876 | SAMEA3448876 | ERR1069953 | GCA 900125695.1 | N/A |
| PDT000170911.2 | SAMEA3448833 | SAMEA3448833 | ERR1069910 | GCA 900125365.1 | N/A |
| PDT000170913.2 | SAMEA3448850 | SAMEA3448850 | ERR1069927 | GCA 900125495.1 | N/A |

|                |              |              |            |                 |     |
|----------------|--------------|--------------|------------|-----------------|-----|
| PDT000170915.2 | SAMEA3449034 | SAMEA3449034 | ERR1069887 | GCA 900125135.1 | N/A |
| PDT000170916.2 | SAMEA3449006 | SAMEA3449006 | ERR1069859 | GCA 900124865.1 | N/A |
| PDT000170921.2 | SAMEA3448941 | SAMEA3448941 | ERR1070028 | GCA 900126235.1 | N/A |
| PDT000170930.2 | SAMEA3449032 | SAMEA3449032 | ERR1069885 | GCA 900125125.1 | N/A |
| PDT000170935.2 | SAMEA3448889 | SAMEA3448889 | ERR1069976 | GCA 900126335.1 | N/A |
| PDT000170939.2 | SAMEA3449060 | SAMEA3449060 | ERR1070060 | GCA 900126715.1 | N/A |
| PDT000170943.2 | SAMEA3448967 | SAMEA3448967 | ERR1070054 | GCA 900126475.1 | N/A |
| PDT000170944.2 | SAMEA3449018 | SAMEA3449018 | ERR1069871 | GCA 900124985.1 | N/A |
| PDT000170948.2 | SAMEA3448934 | SAMEA3448934 | ERR1070021 | GCA 900126175.1 | N/A |
| PDT000170957.2 | SAMEA3448984 | SAMEA3448984 | ERR1069837 | GCA 900124685.1 | N/A |
| PDT000170958.2 | SAMEA3449045 | SAMEA3449045 | ERR1069898 | GCA 900125245.1 | N/A |
| PDT000170965.2 | SAMEA3448840 | SAMEA3448840 | ERR1069917 | GCA 900125415.1 | N/A |
| PDT000170968.2 | SAMEA3448933 | SAMEA3448933 | ERR1070020 | GCA 900126165.1 | N/A |
| PDT000170973.2 | SAMEA3448842 | SAMEA3448842 | ERR1069919 | GCA 900125435.1 | N/A |
| PDT000170984.2 | SAMEA3448873 | SAMEA3448873 | ERR1069950 | GCA 900125675.1 | N/A |
| PDT000170985.2 | SAMEA3448916 | SAMEA3448916 | ERR1070003 | GCA 900126015.1 | N/A |
| PDT000170987.2 | SAMEA3448879 | SAMEA3448879 | ERR1069956 | GCA 900125715.1 | N/A |
| PDT000170992.2 | SAMEA3448998 | SAMEA3448998 | ERR1069851 | GCA 900124805.1 | N/A |
| PDT000170994.2 | SAMEA3449022 | SAMEA3449022 | ERR1069875 | GCA 900125035.1 | N/A |
| PDT000170995.2 | SAMEA3448868 | SAMEA3448868 | ERR1069945 | GCA 900125635.1 | N/A |
| PDT000170997.2 | SAMEA3448990 | SAMEA3448990 | ERR1069843 | GCA 900124745.1 | N/A |
| PDT000171003.2 | SAMEA3448858 | SAMEA3448858 | ERR1069935 | GCA 900125565.1 | N/A |
| PDT000171008.2 | SAMEA3449053 | SAMEA3449053 | ERR1069906 | GCA 900125315.1 | N/A |
| PDT000171011.2 | SAMEA3448897 | SAMEA3448897 | ERR1069984 | GCA 900125865.1 | N/A |
| PDT000171016.2 | SAMEA3449047 | SAMEA3449047 | ERR1069900 | GCA 900125265.1 | N/A |
| PDT000171017.2 | SAMEA3448963 | SAMEA3448963 | ERR1070050 | GCA 900126435.1 | N/A |
| PDT000171018.2 | SAMEA3448909 | SAMEA3448909 | ERR1069996 | GCA 900125935.1 | N/A |
| PDT000171019.2 | SAMEA3448835 | SAMEA3448835 | ERR1069912 | GCA 900125375.1 | N/A |
| PDT000171033.2 | SAMEA3448949 | SAMEA3448949 | ERR1070036 | GCA 900126325.1 | N/A |
| PDT000171034.2 | SAMEA3448980 | SAMEA3448980 | ERR1069833 | GCA 900124665.1 | N/A |
| PDT000171038.2 | SAMEA3449033 | SAMEA3449033 | ERR1069886 | GCA 900125145.1 | N/A |
| PDT000171045.2 | SAMEA3448914 | SAMEA3448914 | ERR1070001 | GCA 900125995.1 | N/A |
| PDT000171049.2 | SAMEA3448920 | SAMEA3448920 | ERR1070007 | GCA 900126045.1 | N/A |
| PDT000171052.2 | SAMEA3449002 | SAMEA3449002 | ERR1069855 | GCA 900124845.1 | N/A |
| PDT000171054.2 | SAMEA3448864 | SAMEA3448864 | ERR1069941 | GCA 900125605.1 | N/A |
| PDT000171055.2 | SAMEA3449010 | SAMEA3449010 | ERR1069863 | GCA 900124915.1 | N/A |
| PDT000171056.2 | SAMEA3448844 | SAMEA3448844 | ERR1069921 | GCA 900125445.1 | N/A |
| PDT000171061.2 | SAMEA3448836 | SAMEA3448836 | ERR1069913 | GCA 900125385.1 | N/A |
| PDT000171064.2 | SAMEA3448992 | SAMEA3448992 | ERR1069845 | GCA 900124765.1 | N/A |
| PDT000171066.2 | SAMEA3448993 | SAMEA3448993 | ERR1069846 | GCA 900124775.1 | N/A |
| PDT000171068.2 | SAMEA3448937 | SAMEA3448937 | ERR1070024 | GCA 900126205.1 | N/A |
| PDT000171080.2 | SAMEA3449005 | SAMEA3449005 | ERR1069858 | GCA 900124855.1 | N/A |
| PDT000171081.2 | SAMEA3448848 | SAMEA3448848 | ERR1069925 | GCA 900125485.1 | N/A |
| PDT000171087.2 | SAMEA3449027 | SAMEA3449027 | ERR1069880 | GCA 900125085.1 | N/A |
| PDT000171088.2 | SAMEA3449021 | SAMEA3449021 | ERR1069874 | GCA 900125025.1 | N/A |
| PDT000171093.2 | SAMEA3449050 | SAMEA3449050 | ERR1069903 | GCA 900125295.1 | N/A |
| PDT000171098.2 | SAMEA3449054 | SAMEA3449054 | ERR1069907 | GCA 900125325.1 | N/A |
| PDT000171101.2 | SAMEA3449405 | SAMEA3449405 | ERR1069968 | GCA 900125825.1 | N/A |
| PDT000171102.2 | SAMEA3448977 | SAMEA3448977 | ERR1069830 | GCA 900125275.1 | N/A |
| PDT000171118.2 | SAMEA3449061 | SAMEA3449061 | ERR1070061 | GCA 900128305.1 | N/A |
| PDT000171125.2 | SAMEA3449029 | SAMEA3449029 | ERR1069882 | GCA 900127745.1 | N/A |
| PDT000171128.2 | SAMEA3448958 | SAMEA3448958 | ERR1070045 | GCA 900128085.1 | N/A |
| PDT000171130.2 | SAMEA3448894 | SAMEA3448894 | ERR1069981 | GCA 900127935.1 | N/A |
| PDT000171139.2 | SAMEA3449402 | SAMEA3449402 | ERR1069965 | GCA 900127905.1 | N/A |
| PDT000171142.2 | SAMEA3448892 | SAMEA3448892 | ERR1069979 | GCA 900127925.1 | N/A |
| PDT000171148.2 | SAMEA3448950 | SAMEA3448950 | ERR1070037 | GCA 900128065.1 | N/A |
| PDT000171155.2 | SAMEA3448960 | SAMEA3448960 | ERR1070047 | GCA 900128095.1 | N/A |
| PDT000171156.2 | SAMEA3448851 | SAMEA3448851 | ERR1069928 | GCA 900127835.1 | N/A |
| PDT000171157.2 | SAMEA3448969 | SAMEA3448969 | ERR1070056 | GCA 900128115.1 | N/A |
| PDT000171158.2 | SAMEA3448903 | SAMEA3448903 | ERR1069990 | GCA 900127975.1 | N/A |
| PDT000171161.2 | SAMEA3448877 | SAMEA3448877 | ERR1069954 | GCA 900127885.1 | N/A |
| PDT000171162.2 | SAMEA3448882 | SAMEA3448882 | ERR1069969 | GCA 900127915.1 | N/A |
| PDT000171163.2 | SAMEA3448995 | SAMEA3448995 | ERR1069848 | GCA 900127685.1 | N/A |
| PDT000171170.2 | SAMEA3448905 | SAMEA3448905 | ERR1069992 | GCA 900127995.1 | N/A |
| PDT000171171.2 | SAMEA3448898 | SAMEA3448898 | ERR1069985 | GCA 900127955.1 | N/A |
| PDT000171172.2 | SAMEA3449104 | SAMEA3449104 | ERR1070104 | GCA 900128285.1 | N/A |
| PDT000171174.2 | SAMEA3448834 | SAMEA3448834 | ERR1069911 | GCA 900127795.1 | N/A |
| PDT000171176.2 | SAMEA3448938 | SAMEA3448938 | ERR1070025 | GCA 900128055.1 | N/A |

|                |               |               |            |                 |     |
|----------------|---------------|---------------|------------|-----------------|-----|
| PDT000171182.2 | SAMEA3448872  | SAMEA3448872  | ERR1069949 | GCA 900127875.1 | N/A |
| PDT000171186.2 | SAMEA3448982  | SAMEA3448982  | ERR1069835 | GCA 900127655.1 | N/A |
| PDT000171187.2 | SAMEA3448893  | SAMEA3448893  | ERR1069980 | GCA 900127945.1 | N/A |
| PDT000171189.2 | SAMEA3449004  | SAMEA3449004  | ERR1069857 | GCA 900127715.1 | N/A |
| PDT000171190.2 | SAMEA3448979  | SAMEA3448979  | ERR1069832 | GCA 900127645.1 | N/A |
| PDT000171191.2 | SAMEA3448887  | SAMEA3448887  | ERR1069974 | GCA 900128045.1 | N/A |
| PDT000171193.2 | SAMEA3448951  | SAMEA3448951  | ERR1070038 | GCA 900128075.1 | N/A |
| PDT000171196.2 | SAMEA3448970  | SAMEA3448970  | ERR1069823 | GCA 900127635.1 | N/A |
| PDT000171197.2 | SAMEA3449003  | SAMEA3449003  | ERR1069856 | GCA 900127695.1 | N/A |
| PDT000171200.2 | SAMEA3448874  | SAMEA3448874  | ERR1069951 | GCA 900127895.1 | N/A |
| PDT000171204.2 | SAMEA3449066  | SAMEA3449066  | ERR1070066 | GCA 900128125.1 | N/A |
| PDT000171208.2 | SAMEA3448997  | SAMEA3448997  | ERR1069850 | GCA 900127665.1 | N/A |
| PDT000171211.2 | SAMEA3449012  | SAMEA3449012  | ERR1069865 | GCA 900127725.1 | N/A |
| PDT000171214.2 | SAMEA3448928  | SAMEA3448928  | ERR1070015 | GCA 900128035.1 | N/A |
| PDT000171217.2 | SAMEA3448902  | SAMEA3448902  | ERR1069989 | GCA 900127965.1 | N/A |
| PDT000171218.2 | SAMEA3449048  | SAMEA3449048  | ERR1069901 | GCA 900127775.1 | N/A |
| PDT000171221.2 | SAMEA3448919  | SAMEA3448919  | ERR1070006 | GCA 900128015.1 | N/A |
| PDT000171223.2 | SAMEA3448907  | SAMEA3448907  | ERR1069994 | GCA 900128005.1 | N/A |
| PDT000171228.2 | SAMEA3449052  | SAMEA3449052  | ERR1069905 | GCA 900127785.1 | N/A |
| PDT000171232.2 | SAMEA3448849  | SAMEA3448849  | ERR1069926 | GCA 900127845.1 | N/A |
| PDT000171233.2 | SAMEA3449001  | SAMEA3449001  | ERR1069854 | GCA 900127705.1 | N/A |
| PDT000171236.2 | SAMEA3448867  | SAMEA3448867  | ERR1069944 | GCA 900127865.1 | N/A |
| PDT000171237.2 | SAMEA3449069  | SAMEA3449069  | ERR1070069 | GCA 900128135.1 | N/A |
| PDT000171239.2 | SAMEA3449025  | SAMEA3449025  | ERR1069878 | GCA 900127735.1 | N/A |
| PDT000171240.2 | SAMEA3448843  | SAMEA3448843  | ERR1069920 | GCA 900127815.1 | N/A |
| PDT000172397.2 | SAMEA3448860  | SAMEA3448860  | ERR1069937 | GCA 900127825.1 | N/A |
| PDT000172399.2 | SAMEA3449065  | SAMEA3449065  | ERR1070065 | GCA 900128375.1 | N/A |
| PDT000172404.2 | SAMEA3449109  | SAMEA3449109  | ERR1070109 | GCA 900128315.1 | N/A |
| PDT000172405.2 | SAMEA3448837  | SAMEA3448837  | ERR1069914 | GCA 900127805.1 | N/A |
| PDT000172688.2 | SAMN05858801  | SAMN05858801  | SRR5407869 | GCA 001899895.1 | N/A |
| PDT000172689.2 | SAMN05858806  | SAMN05858806  | SRR5407868 | GCA 001899925.1 | N/A |
| PDT000172690.2 | SAMN05858808  | SAMN05858808  | SRR5407867 | GCA 001899935.1 | N/A |
| PDT000172691.2 | SAMN05858809  | SAMN05858809  | SRR5407866 | GCA 001899965.1 | N/A |
| PDT000172692.2 | SAMN05858826  | SAMN05858826  | SRR5407865 | GCA 001899975.1 | N/A |
| PDT000172693.2 | SAMN05858838  | SAMN05858838  | SRR5407863 | GCA 001900005.1 | N/A |
| PDT000172694.2 | SAMN05858837  | SAMN05858837  | SRR5407864 | GCA 001900015.1 | N/A |
| PDT000172695.2 | SAMN05859285  | SAMN05859285  | SRR5407862 | GCA 001900045.1 | N/A |
| PDT000172696.2 | SAMN05860625  | SAMN05860625  | SRR5407861 | GCA 001900065.1 | N/A |
| PDT000172697.2 | SAMN05860627  | SAMN05860627  | SRR5407860 | GCA 001900085.1 | N/A |
| PDT000172698.2 | SAMN05860635  | SAMN05860635  | SRR5407859 | GCA 001900095.1 | N/A |
| PDT000172699.2 | SAMN05860689  | SAMN05860689  | SRR5407858 | GCA 001900115.1 | N/A |
| PDT000172700.2 | SAMN05860690  | SAMN05860690  | SRR5407857 | GCA 001900145.1 | N/A |
| PDT000172701.2 | SAMN05860691  | SAMN05860691  | SRR5407856 | GCA 001900165.1 | N/A |
| PDT000178170.2 | SAMN03893362  | SAMN03893362  | SRR5909224 | GCA 001936785.1 | N/A |
| PDT000178173.2 | SAMN03893381  | SAMN03893381  | SRR5909170 | GCA 001936845.1 | N/A |
| PDT000184721.1 | SAMEA24664168 | SAMEA24664168 | ERR1753379 | GCA 015612625.1 | N/A |
| PDT000184726.1 | SAMEA24667918 | SAMEA24667918 | ERR1753384 | GCA 015612525.1 | N/A |
| PDT000184727.1 | SAMEA24668668 | SAMEA24668668 | ERR1753385 | GCA 015612495.1 | N/A |
| PDT000184728.1 | SAMEA24669418 | SAMEA24669418 | ERR1753386 | GCA 015612445.1 | N/A |
| PDT000184729.1 | SAMEA24670168 | SAMEA24670168 | ERR1753387 | GCA 015612465.1 | N/A |
| PDT000184734.1 | SAMEA24673918 | SAMEA24673918 | ERR1753392 | GCA 015611905.1 | N/A |
| PDT000184737.1 | SAMEA24676168 | SAMEA24676168 | ERR1753395 | GCA 015611545.1 | N/A |
| PDT000184743.1 | SAMEA24680668 | SAMEA24680668 | ERR1753401 | GCA 015612405.1 | N/A |
| PDT000184744.1 | SAMEA24681418 | SAMEA24681418 | ERR1753402 | GCA 015612385.1 | N/A |
| PDT000184748.1 | SAMEA24684418 | SAMEA24684418 | ERR1753406 | GCA 015612305.1 | N/A |
| PDT000184749.1 | SAMEA24685168 | SAMEA24685168 | ERR1753407 | GCA 015612285.1 | N/A |
| PDT000184757.1 | SAMEA24691168 | SAMEA24691168 | ERR1753415 | GCA 015612045.1 | N/A |
| PDT000184760.1 | SAMEA24693418 | SAMEA24693418 | ERR1753418 | GCA 015611985.1 | N/A |
| PDT000184763.1 | SAMEA24695668 | SAMEA24695668 | ERR1753421 | GCA 015612005.1 | N/A |
| PDT000184764.1 | SAMEA24696418 | SAMEA24696418 | ERR1753422 | GCA 015612015.1 | N/A |
| PDT000184765.1 | SAMEA24697168 | SAMEA24697168 | ERR1753423 | GCA 015611945.1 | N/A |
| PDT000184769.1 | SAMEA24700168 | SAMEA24700168 | ERR1753427 | GCA 015611915.1 | N/A |
| PDT000184770.1 | SAMEA24700918 | SAMEA24700918 | ERR1753428 | GCA 015611885.1 | N/A |
| PDT000184776.1 | SAMEA24705418 | SAMEA24705418 | ERR1753434 | GCA 015611685.1 | N/A |
| PDT000184777.1 | SAMEA24706168 | SAMEA24706168 | ERR1753435 | GCA 015611705.1 | N/A |
| PDT000184787.1 | SAMEA24713668 | SAMEA24713668 | ERR1753445 | GCA 015611565.1 | N/A |
| PDT000184788.1 | SAMEA24714418 | SAMEA24714418 | ERR1753446 | GCA 015611445.1 | N/A |
| PDT000184792.1 | SAMEA24717418 | SAMEA24717418 | ERR1753450 | GCA 015611365.1 | N/A |



|                |               |               |             |                 |     |
|----------------|---------------|---------------|-------------|-----------------|-----|
| PDT000184800.1 | SAMEA24723418 | SAMEA24723418 | ERR1753458  | GCA 015610125.1 | N/A |
| PDT000184803.1 | SAMEA24725668 | SAMEA24725668 | ERR1753461  | GCA 015610225.1 | N/A |
| PDT000184807.1 | SAMEA24728668 | SAMEA24728668 | ERR1753465  | GCA 015611125.1 | N/A |
| PDT000184811.1 | SAMEA24731668 | SAMEA24731668 | ERR1753469  | GCA 015611085.1 | N/A |
| PDT000184817.1 | SAMEA24736168 | SAMEA24736168 | ERR1753475  | GCA 015611065.1 | N/A |
| PDT000184818.1 | SAMEA24736918 | SAMEA24736918 | ERR1753476  | GCA 015612905.1 | N/A |
| PDT000184822.1 | SAMEA24739918 | SAMEA24739918 | ERR1753480  | GCA 015610935.1 | N/A |
| PDT000184836.1 | SAMEA24750418 | SAMEA24750418 | ERR1753494  | GCA 015610425.1 | N/A |
| PDT000184842.1 | SAMEA24754918 | SAMEA24754918 | ERR1753500  | GCA 015610265.1 | N/A |
| PDT000184848.1 | SAMEA24759418 | SAMEA24759418 | ERR1753506  | GCA 015610585.1 | N/A |
| PDT000184849.1 | SAMEA24760168 | SAMEA24760168 | ERR1753507  | GCA 015610465.1 | N/A |
| PDT000184850.1 | SAMEA24760918 | SAMEA24760918 | ERR1753508  | GCA 015610565.1 | N/A |
| PDT000185425.2 | SAMN05773537  | SAMN05773537  | SRR4291397  | GCA 001982965.1 | N/A |
| PDT000185428.2 | SAMN05773539  | SAMN05773539  | SRR4291399  | GCA 001983025.1 | N/A |
| PDT000185430.2 | SAMN05773540  | SAMN05773540  | SRR4291400  | GCA 001983065.1 | N/A |
| PDT000185431.2 | SAMN05773542  | SAMN05773542  | SRR4291402  | GCA 001983085.1 | N/A |
| PDT000185432.2 | SAMN05773541  | SAMN05773541  | SRR4291401  | GCA 001983095.1 | N/A |
| PDT000185434.2 | SAMN05773543  | SAMN05773543  | SRR4291403  | GCA 001983125.1 | N/A |
| PDT000186503.2 | SAMEA1469707  | SAMEA1469707  | ERR158669   | GCA 000039735.1 | N/A |
| PDT000186504.2 | SAMEA1469655  | SAMEA1469655  | ERR158778   | GCA 900048325.1 | N/A |
| PDT000186897.2 | SAMN06311511  | SAMN06311511  | SRR5237408  | GCA 015610645.1 | N/A |
| PDT000188677.2 | SAMEA48338668 | SAMEA48338668 | ERR1794909  | GCA 900155795.1 | N/A |
| PDT000188678.2 | SAMEA48334918 | SAMEA48334918 | ERR1794904  | GCA 900155725.1 | N/A |
| PDT000188683.2 | SAMEA48332668 | SAMEA48332668 | ERR1794901  | GCA 900155775.1 | N/A |
| PDT000188684.2 | SAMEA48336418 | SAMEA48336418 | ERR1794906  | GCA 900155815.1 | N/A |
| PDT000188685.2 | SAMEA48341668 | SAMEA48341668 | ERR1794913  | GCA 900155765.1 | N/A |
| PDT000188688.2 | SAMEA48333418 | SAMEA48333418 | ERR1794902  | GCA 900155875.1 | N/A |
| PDT000188689.2 | SAMEA48331918 | SAMEA48331918 | ERR1794900  | GCA 900155705.1 | N/A |
| PDT000188692.2 | SAMEA48337168 | SAMEA48337168 | ERR1794907  | GCA 900155715.1 | N/A |
| PDT000188693.2 | SAMEA48339418 | SAMEA48339418 | ERR1794910  | GCA 900155845.1 | N/A |
| PDT000188694.2 | SAMEA48342418 | SAMEA48342418 | ERR1794914  | GCA 900155835.1 | N/A |
| PDT000188695.2 | SAMEA48337918 | SAMEA48337918 | ERR1794908  | GCA 900155745.1 | N/A |
| PDT000188697.2 | SAMEA48340918 | SAMEA48340918 | ERR1794912  | GCA 900155755.1 | N/A |
| PDT000188698.2 | SAMEA48335668 | SAMEA48335668 | ERR1794905  | GCA 900155805.1 | N/A |
| PDT000188699.2 | SAMEA48340168 | SAMEA48340168 | ERR1794911  | GCA 900155825.1 | N/A |
| PDT000188700.2 | SAMEA48334168 | SAMEA48334168 | ERR1794903  | GCA 900155785.1 | N/A |
| PDT000193852.2 | SAMN06480668  | SAMN06480668  | SRR5320246  | GCA 002025125.1 | N/A |
| PDT000204552.3 | SAMN04903357  | SAMN04903357  | SRR13238531 | GCA 002097595.2 | N/A |
| PDT000220591.2 | SAMN07201052  | SAMN07201052  | SRR5651568  | GCA 002204735.1 | N/A |
| PDT000226286.2 | SAMN04286980  | SAMN04286980  | SRR3574768  | GCA 002221815.1 | N/A |
| PDT000226288.2 | SAMN03455945  | SAMN03455945  | SRR3574703  | GCA 002221845.1 | N/A |
| PDT000226290.2 | SAMN04287041  | SAMN04287041  | SRR3574770  | GCA 002221895.1 | N/A |
| PDT000226291.2 | SAMN04287042  | SAMN04287042  | SRR3574810  | GCA 002221905.1 | N/A |
| PDT000229780.2 | SAMN06894057  | SAMN06894057  | SRR5682128  | GCA 002224825.1 | N/A |
| PDT000234458.2 | SAMN06040412  | SAMN06040412  | SRR5822162  | GCA 002250725.1 | N/A |
| PDT000234460.2 | SAMN06040411  | SAMN06040411  | SRR5822159  | GCA 002250785.1 | N/A |
| PDT000234461.2 | SAMN04287043  | SAMN04287043  | SRR5822166  | GCA 002250795.1 | N/A |
| PDT000234463.2 | SAMN04286984  | SAMN04286984  | SRR5822163  | GCA 002250865.1 | N/A |
| PDT000238756.2 | SAMN03893310  | SAMN03893310  | SRR5909241  | GCA 002272995.1 | N/A |
| PDT000238758.2 | SAMN03893311  | SAMN03893311  | SRR5909240  | GCA 002272985.1 | N/A |
| PDT000238759.2 | SAMN03893312  | SAMN03893312  | SRR5909235  | GCA 002273015.1 | N/A |
| PDT000238762.2 | SAMN03893316  | SAMN03893316  | SRR5909262  | GCA 002273085.1 | N/A |
| PDT000238765.2 | SAMN03893231  | SAMN03893231  | SRR5909282  | GCA 002273155.1 | N/A |
| PDT000238766.2 | SAMN03893313  | SAMN03893313  | SRR5909234  | GCA 002273175.1 | N/A |
| PDT000238767.2 | SAMN03893309  | SAMN03893309  | SRR5909242  | GCA 002273165.1 | N/A |
| PDT000238775.2 | SAMN03893245  | SAMN03893245  | SRR5909209  | GCA 002273345.1 | N/A |
| PDT000238790.2 | SAMN03893271  | SAMN03893271  | SRR5909139  | GCA 002273665.1 | N/A |
| PDT000238791.2 | SAMN03893274  | SAMN03893274  | SRR5909151  | GCA 002273685.1 | N/A |
| PDT000238793.2 | SAMN03893273  | SAMN03893273  | SRR5909149  | GCA 002273705.1 | N/A |
| PDT000238794.2 | SAMN03893275  | SAMN03893275  | SRR5909152  | GCA 002273725.1 | N/A |
| PDT000238797.2 | SAMN03893277  | SAMN03893277  | SRR5909154  | GCA 002273795.1 | N/A |
| PDT000238804.2 | SAMN03893291  | SAMN03893291  | SRR5909275  | GCA 002273945.1 | N/A |
| PDT000238805.2 | SAMN03893293  | SAMN03893293  | SRR5909277  | GCA 002273955.1 | N/A |
| PDT000238809.2 | SAMN03893298  | SAMN03893298  | SRR5909289  | GCA 002274035.1 | N/A |
| PDT000238810.2 | SAMN03893300  | SAMN03893300  | SRR5909287  | GCA 002274055.1 | N/A |
| PDT000238814.2 | SAMN03893304  | SAMN03893304  | SRR5909239  | GCA 002274135.1 | N/A |
| PDT000238815.2 | SAMN03893305  | SAMN03893305  | SRR5909238  | GCA 002274155.1 | N/A |
| PDT000238816.2 | SAMN03893306  | SAMN03893306  | SRR5909237  | GCA 002274175.1 | N/A |

|                |              |              |             |                 |     |
|----------------|--------------|--------------|-------------|-----------------|-----|
| PDT000238817.2 | SAMN03893307 | SAMN03893307 | SRR5909236  | GCA 002274205.1 | N/A |
| PDT000238818.2 | SAMN03893336 | SAMN03893336 | SRR5909220  | GCA 002274225.1 | N/A |
| PDT000238820.2 | SAMN03893337 | SAMN03893337 | SRR5909221  | GCA 002274245.1 | N/A |
| PDT000238821.2 | SAMN03893340 | SAMN03893340 | SRR5909216  | GCA 002274285.1 | N/A |
| PDT000238822.2 | SAMN03893341 | SAMN03893341 | SRR5909217  | GCA 002274295.1 | N/A |
| PDT000238823.2 | SAMN03893342 | SAMN03893342 | SRR5909214  | GCA 002274305.1 | N/A |
| PDT000238824.2 | SAMN03893343 | SAMN03893343 | SRR5909215  | GCA 002274335.1 | N/A |
| PDT000238825.2 | SAMN03893345 | SAMN03893345 | SRR5909223  | GCA 002274375.1 | N/A |
| PDT000238826.2 | SAMN03893353 | SAMN03893353 | SRR5909246  | GCA 002274365.1 | N/A |
| PDT000238827.2 | SAMN03893351 | SAMN03893351 | SRR5909244  | GCA 002274385.1 | N/A |
| PDT000238828.2 | SAMN03893355 | SAMN03893355 | SRR5909252  | GCA 002274395.1 | N/A |
| PDT000238830.2 | SAMN03893360 | SAMN03893360 | SRR5909226  | GCA 002274445.1 | N/A |
| PDT000238831.2 | SAMN03893361 | SAMN03893361 | SRR5909227  | GCA 002274475.1 | N/A |
| PDT000238832.2 | SAMN03893367 | SAMN03893367 | SRR5909198  | GCA 002274465.1 | N/A |
| PDT000238833.2 | SAMN03893370 | SAMN03893370 | SRR5909203  | GCA 002274545.1 | N/A |
| PDT000238834.2 | SAMN03893369 | SAMN03893369 | SRR5909196  | GCA 002274535.1 | N/A |
| PDT000238838.2 | SAMN03893376 | SAMN03893376 | SRR5909173  | GCA 002274615.1 | N/A |
| PDT000238840.2 | SAMN03893382 | SAMN03893382 | SRR5909171  | GCA 002274635.1 | N/A |
| PDT000238842.2 | SAMN03893388 | SAMN03893388 | SRR5909189  | GCA 002274725.1 | N/A |
| PDT000238844.2 | SAMN03893393 | SAMN03893393 | SRR5909192  | GCA 002274765.1 | N/A |
| PDT000238845.2 | SAMN03893396 | SAMN03893396 | SRR5909165  | GCA 002274795.1 | N/A |
| PDT000238849.2 | SAMN03893328 | SAMN03893328 | SRR5909185  | GCA 002274855.1 | N/A |
| PDT000238850.2 | SAMN03893332 | SAMN03893332 | SRR5909181  | GCA 002274875.1 | N/A |
| PDT000238851.2 | SAMN03893331 | SAMN03893331 | SRR5909148  | GCA 002274895.1 | N/A |
| PDT000238852.2 | SAMN03893334 | SAMN03893334 | SRR5909162  | GCA 002274915.1 | N/A |
| PDT000238853.2 | SAMN03893319 | SAMN03893319 | SRR5909257  | GCA 002274945.1 | N/A |
| PDT000238854.2 | SAMN03893324 | SAMN03893324 | SRR5909183  | GCA 002274955.1 | N/A |
| PDT000238859.2 | SAMN03893325 | SAMN03893325 | SRR5909182  | GCA 002275025.1 | N/A |
| PDT000238871.2 | SAMN03893267 | SAMN03893267 | SRR5909143  | GCA 002275285.1 | N/A |
| PDT000238873.2 | SAMN03893278 | SAMN03893278 | SRR5909155  | GCA 002275345.1 | N/A |
| PDT000238875.2 | SAMN03893284 | SAMN03893284 | SRR5909270  | GCA 002275365.1 | N/A |
| PDT000238878.2 | SAMN03893290 | SAMN03893290 | SRR5909276  | GCA 002275425.1 | N/A |
| PDT000238879.2 | SAMN03893299 | SAMN03893299 | SRR5909290  | GCA 002275455.1 | N/A |
| PDT000238880.2 | SAMN03893295 | SAMN03893295 | SRR5909286  | GCA 002275465.1 | N/A |
| PDT000238884.2 | SAMN03893348 | SAMN03893348 | SRR5909251  | GCA 002275555.1 | N/A |
| PDT000238886.2 | SAMN03893350 | SAMN03893350 | SRR5909245  | GCA 002275585.1 | N/A |
| PDT000238887.2 | SAMN03893357 | SAMN03893357 | SRR5909231  | GCA 002275625.1 | N/A |
| PDT000238891.2 | SAMN03893365 | SAMN03893365 | SRR5909233  | GCA 002275715.1 | N/A |
| PDT000238893.2 | SAMN03893374 | SAMN03893374 | SRR5909195  | GCA 002275755.1 | N/A |
| PDT000238898.2 | SAMN03893392 | SAMN03893392 | SRR5909193  | GCA 002275825.1 | N/A |
| PDT000238899.2 | SAMN03893394 | SAMN03893394 | SRR5909179  | GCA 002275865.1 | N/A |
| PDT000238900.2 | SAMN03893329 | SAMN03893329 | SRR5909184  | GCA 002275885.1 | N/A |
| PDT000238901.2 | SAMN03893333 | SAMN03893333 | SRR5909180  | GCA 002275895.1 | N/A |
| PDT000238903.2 | SAMN03893335 | SAMN03893335 | SRR5909161  | GCA 002275945.1 | N/A |
| PDT000238904.2 | SAMN03893318 | SAMN03893318 | SRR5909256  | GCA 002275965.1 | N/A |
| PDT000246995.2 | SAMN07312456 | SAMN07312456 | SRR5878904  | GCA 002386245.1 | N/A |
| PDT000258931.2 | SAMN03763978 | SAMN03763978 | SRR12980654 | GCA 002633845.1 | N/A |
| PDT000261163.2 | SAMEA4081496 | SAMEA4081496 | ERR1535351  | GCA 900233935.1 | N/A |
| PDT000274370.2 | SAMN08146092 | SAMN08146092 | SRR8891217  | GCA 002843725.1 | N/A |
| PDT000274372.2 | SAMN08146091 | SAMN08146091 | SRR8891218  | GCA 002843765.1 | N/A |
| PDT000274373.2 | SAMN08146089 | SAMN08146089 | SRR8891219  | GCA 002843775.1 | N/A |
| PDT000274374.2 | SAMN08146088 | SAMN08146088 | SRR8891212  | GCA 002843805.1 | N/A |
| PDT000274376.2 | SAMN08146086 | SAMN08146086 | SRR8891214  | GCA 002843855.1 | N/A |
| PDT000278118.3 | SAMN04966147 | SAMN04966147 | SRR6484424  | GCA 001717975.3 | N/A |
| PDT000284164.2 | SAMN04966138 | SAMN04966138 | SRR6484363  | GCA 001735645.2 | N/A |
| PDT000286644.2 | SAMN04966148 | SAMN04966148 | SRR6484425  | GCA 001717665.2 | N/A |
| PDT000287913.2 | SAMN08456648 | SAMN08456648 | SRR7795229  | GCA 002925615.1 | N/A |
| PDT000287914.2 | SAMN08456629 | SAMN08456629 | SRR7795233  | GCA 002925605.1 | N/A |
| PDT000289264.2 | SAMN07782090 | SAMN07782090 | SRR6327761  | GCA 002930565.1 | N/A |
| PDT000293937.2 | SAMN04966145 | SAMN04966145 | SRR6484367  | GCA 001717685.3 | N/A |
| PDT000294895.1 | SAMN08720253 | SAMN08720253 | SRR6852597  | GCA 015610065.1 | N/A |
| PDT000298219.2 | SAMN08689420 | SAMN08689420 | SRR6828692  | GCA 003011005.1 | N/A |
| PDT000298220.2 | SAMN08689418 | SAMN08689418 | SRR6828690  | GCA 003010995.1 | N/A |
| PDT000298222.2 | SAMN08689415 | SAMN08689415 | SRR6828689  | GCA 003011055.1 | N/A |
| PDT000298223.2 | SAMN08689419 | SAMN08689419 | SRR6828693  | GCA 003011065.1 | N/A |
| PDT000302341.2 | SAMN08456651 | SAMN08456651 | SRR7795232  | GCA 003017755.1 | N/A |
| PDT000302342.2 | SAMN08456662 | SAMN08456662 | SRR7795231  | GCA 003017735.1 | N/A |
| PDT000302343.2 | SAMN08456633 | SAMN08456633 | SRR7795230  | GCA 003017835.1 | N/A |

|                |              |              |            |                 |     |
|----------------|--------------|--------------|------------|-----------------|-----|
| PDT000304321.2 | SAMN03763991 | SAMN03763991 | SRR5912676 | GCA 003031425.1 | N/A |
| PDT000313594.2 | SAMN07291559 | SAMN07291559 | SRR6985705 | GCA 003073635.1 | N/A |
| PDT000313597.2 | SAMN07291557 | SAMN07291557 | SRR6995008 | GCA 003073755.1 | N/A |
| PDT000313598.2 | SAMN07291555 | SAMN07291555 | SRR6995005 | GCA 003073775.1 | N/A |
| PDT000323158.2 | SAMN04966150 | SAMN04966150 | SRR6484429 | GCA 001717645.3 | N/A |
| PDT000326662.2 | SAMN04901613 | SAMN04901613 | SRR4417451 | GCA 003193685.1 | N/A |
| PDT000326664.2 | SAMN04901606 | SAMN04901606 | SRR4417440 | GCA 003193725.1 | N/A |
| PDT000326665.2 | SAMN07291563 | SAMN07291563 | SRR6985739 | GCA 003193745.1 | N/A |
| PDT000326666.2 | SAMN07291564 | SAMN07291564 | SRR6995018 | GCA 003193765.1 | N/A |
| PDT000326668.2 | SAMN07291560 | SAMN07291560 | SRR6985706 | GCA 003193885.1 | N/A |
| PDT000326669.2 | SAMN04901615 | SAMN04901615 | SRR4417441 | GCA 003193965.1 | N/A |
| PDT000326670.2 | SAMN07291562 | SAMN07291562 | SRR6985710 | GCA 003194005.1 | N/A |
| PDT000326671.2 | SAMN04901605 | SAMN04901605 | SRR6994967 | GCA 003194025.1 | N/A |
| PDT000331086.2 | SAMN04901616 | SAMN04901616 | SRR4417442 | GCA 003203595.1 | N/A |
| PDT000331088.2 | SAMN04901618 | SAMN04901618 | SRR4417444 | GCA 003203635.1 | N/A |
| PDT000331089.2 | SAMN04901612 | SAMN04901612 | SRR4417450 | GCA 003203655.1 | N/A |
| PDT000331090.2 | SAMN04901610 | SAMN04901610 | SRR6985641 | GCA 003203675.1 | N/A |
| PDT000335279.2 | SAMN08717780 | SAMN08717780 | SRR7983587 | GCA 003236755.1 | N/A |
| PDT000335281.2 | SAMN08717779 | SAMN08717779 | SRR7983594 | GCA 003236765.1 | N/A |
| PDT000335282.2 | SAMN08717773 | SAMN08717773 | SRR7983588 | GCA 003236825.1 | N/A |
| PDT000335283.2 | SAMN08717776 | SAMN08717776 | SRR7983593 | GCA 003236795.1 | N/A |
| PDT000335284.2 | SAMN08717774 | SAMN08717774 | SRR7983591 | GCA 003236805.1 | N/A |
| PDT000335285.2 | SAMN08717771 | SAMN08717771 | SRR7983557 | GCA 003236855.1 | N/A |
| PDT000335286.2 | SAMN08717770 | SAMN08717770 | SRR7983556 | GCA 003236875.1 | N/A |
| PDT000335287.2 | SAMN08717767 | SAMN08717767 | SRR7983565 | GCA 003236905.1 | N/A |
| PDT000335288.2 | SAMN08717769 | SAMN08717769 | SRR7983563 | GCA 003236895.1 | N/A |
| PDT000335289.2 | SAMN08717765 | SAMN08717765 | SRR7983559 | GCA 003236935.1 | N/A |
| PDT000335290.2 | SAMN08717764 | SAMN08717764 | SRR7983558 | GCA 003236955.1 | N/A |
| PDT000335292.2 | SAMN08717761 | SAMN08717761 | SRR7983720 | GCA 003237005.1 | N/A |
| PDT000335294.2 | SAMN08717758 | SAMN08717758 | SRR7983723 | GCA 003237045.1 | N/A |
| PDT000335295.2 | SAMN08717757 | SAMN08717757 | SRR7983724 | GCA 003237055.1 | N/A |
| PDT000335296.2 | SAMN08717759 | SAMN08717759 | SRR7983722 | GCA 003237035.1 | N/A |
| PDT000335297.2 | SAMN08717755 | SAMN08717755 | SRR7983726 | GCA 003237095.1 | N/A |
| PDT000335298.2 | SAMN08717748 | SAMN08717748 | SRR7983716 | GCA 003237125.1 | N/A |
| PDT000335299.2 | SAMN08717754 | SAMN08717754 | SRR7983727 | GCA 003237115.1 | N/A |
| PDT000335300.2 | SAMN08717747 | SAMN08717747 | SRR7983715 | GCA 003237145.1 | N/A |
| PDT000335301.2 | SAMN08717746 | SAMN08717746 | SRR7983714 | GCA 003237175.1 | N/A |
| PDT000335302.2 | SAMN08717745 | SAMN08717745 | SRR7983713 | GCA 003237195.1 | N/A |
| PDT000335303.2 | SAMN08717744 | SAMN08717744 | SRR7983712 | GCA 003237205.1 | N/A |
| PDT000335304.2 | SAMN08717739 | SAMN08717739 | SRR7983692 | GCA 003237215.1 | N/A |
| PDT000335305.2 | SAMN08717736 | SAMN08717736 | SRR7983691 | GCA 003237255.1 | N/A |
| PDT000335306.2 | SAMN08717730 | SAMN08717730 | SRR7983678 | GCA 003237275.1 | N/A |
| PDT000335307.2 | SAMN08717735 | SAMN08717735 | SRR7983696 | GCA 003237285.1 | N/A |
| PDT000335308.2 | SAMN08717733 | SAMN08717733 | SRR7983694 | GCA 003237305.1 | N/A |
| PDT000335309.2 | SAMN08717729 | SAMN08717729 | SRR7983671 | GCA 003237335.1 | N/A |
| PDT000335310.2 | SAMN08717728 | SAMN08717728 | SRR7983670 | GCA 003237355.1 | N/A |
| PDT000335311.2 | SAMN08717727 | SAMN08717727 | SRR7983673 | GCA 003237375.1 | N/A |
| PDT000335312.2 | SAMN08717726 | SAMN08717726 | SRR7983672 | GCA 003237365.1 | N/A |
| PDT000335313.2 | SAMN08717722 | SAMN08717722 | SRR7983676 | GCA 003237415.1 | N/A |
| PDT000335314.2 | SAMN08717719 | SAMN08717719 | SRR7983656 | GCA 003237445.1 | N/A |
| PDT000335315.2 | SAMN08717721 | SAMN08717721 | SRR7983650 | GCA 003237435.1 | N/A |
| PDT000335316.2 | SAMN08717715 | SAMN08717715 | SRR7983652 | GCA 003237475.1 | N/A |
| PDT000335317.2 | SAMN08717714 | SAMN08717714 | SRR7983653 | GCA 003237495.1 | N/A |
| PDT000335318.2 | SAMN08717710 | SAMN08717710 | SRR7983620 | GCA 003237515.1 | N/A |
| PDT000335319.2 | SAMN08717705 | SAMN08717705 | SRR7983629 | GCA 003237535.1 | N/A |
| PDT000335320.2 | SAMN08717704 | SAMN08717704 | SRR7983628 | GCA 003237545.1 | N/A |
| PDT000335321.2 | SAMN08717703 | SAMN08717703 | SRR7983627 | GCA 003237575.1 | N/A |
| PDT000335322.2 | SAMN08717702 | SAMN08717702 | SRR7983626 | GCA 003237595.1 | N/A |
| PDT000335323.2 | SAMN08717700 | SAMN08717700 | SRR7983669 | GCA 003237625.1 | N/A |
| PDT000335324.2 | SAMN08717701 | SAMN08717701 | SRR7983668 | GCA 003237615.1 | N/A |
| PDT000335325.2 | SAMN08717694 | SAMN08717694 | SRR7983667 | GCA 003237655.1 | N/A |
| PDT000335327.2 | SAMN08717690 | SAMN08717690 | SRR7983688 | GCA 003237695.1 | N/A |
| PDT000335328.2 | SAMN08717689 | SAMN08717689 | SRR7983681 | GCA 003237705.1 | N/A |
| PDT000335329.2 | SAMN08717686 | SAMN08717686 | SRR7983682 | GCA 003237735.1 | N/A |
| PDT000335330.2 | SAMN08717684 | SAMN08717684 | SRR7983684 | GCA 003237755.1 | N/A |
| PDT000335331.2 | SAMN08717683 | SAMN08717683 | SRR7983687 | GCA 003237775.1 | N/A |
| PDT000335332.2 | SAMN08717785 | SAMN08717785 | SRR7983619 | GCA 003237795.1 | N/A |
| PDT000335333.2 | SAMN08717784 | SAMN08717784 | SRR7983618 | GCA 003237815.1 | N/A |

|                |              |              |            |                 |     |
|----------------|--------------|--------------|------------|-----------------|-----|
| PDT000335334.2 | SAMN08717782 | SAMN08717782 | SRR7983616 | GCA 003237825.1 | N/A |
| PDT000335335.2 | SAMN08717775 | SAMN08717775 | SRR7983590 | GCA 003237855.1 | N/A |
| PDT000335336.2 | SAMN08717772 | SAMN08717772 | SRR7983589 | GCA 003237865.1 | N/A |
| PDT000335337.2 | SAMN08717768 | SAMN08717768 | SRR7983562 | GCA 003237895.1 | N/A |
| PDT000335338.2 | SAMN08717766 | SAMN08717766 | SRR7983564 | GCA 003237915.1 | N/A |
| PDT000335339.2 | SAMN08717760 | SAMN08717760 | SRR7983721 | GCA 003237935.1 | N/A |
| PDT000335340.2 | SAMN08717752 | SAMN08717752 | SRR7983729 | GCA 003237945.1 | N/A |
| PDT000335341.2 | SAMN08717749 | SAMN08717749 | SRR7983717 | GCA 003237975.1 | N/A |
| PDT000335342.2 | SAMN08717741 | SAMN08717741 | SRR7983698 | GCA 003238015.1 | N/A |
| PDT000335343.2 | SAMN08717742 | SAMN08717742 | SRR7983710 | GCA 003237995.1 | N/A |
| PDT000335344.2 | SAMN08717740 | SAMN08717740 | SRR7983699 | GCA 003238035.1 | N/A |
| PDT000335345.2 | SAMN08717738 | SAMN08717738 | SRR7983693 | GCA 003238045.1 | N/A |
| PDT000335346.2 | SAMN08717732 | SAMN08717732 | SRR7983695 | GCA 003238075.1 | N/A |
| PDT000335347.2 | SAMN08717734 | SAMN08717734 | SRR7983697 | GCA 003238085.1 | N/A |
| PDT000335348.2 | SAMN08717725 | SAMN08717725 | SRR7983675 | GCA 003238125.1 | N/A |
| PDT000335349.2 | SAMN08717731 | SAMN08717731 | SRR7983679 | GCA 003238105.1 | N/A |
| PDT000335350.2 | SAMN08717724 | SAMN08717724 | SRR7983674 | GCA 003238155.1 | N/A |
| PDT000335351.2 | SAMN08717723 | SAMN08717723 | SRR7983677 | GCA 003238165.1 | N/A |
| PDT000335352.2 | SAMN08717716 | SAMN08717716 | SRR7983659 | GCA 003238195.1 | N/A |
| PDT000335353.2 | SAMN08717711 | SAMN08717711 | SRR7983621 | GCA 003238205.1 | N/A |
| PDT000335354.2 | SAMN08717709 | SAMN08717709 | SRR7983625 | GCA 003238235.1 | N/A |
| PDT000335355.2 | SAMN08717707 | SAMN08717707 | SRR7983623 | GCA 003238245.1 | N/A |
| PDT000335356.2 | SAMN08717697 | SAMN08717697 | SRR7983660 | GCA 003238285.1 | N/A |
| PDT000335357.2 | SAMN08717706 | SAMN08717706 | SRR7983622 | GCA 003238275.1 | N/A |
| PDT000335359.2 | SAMN08717691 | SAMN08717691 | SRR7983689 | GCA 003238335.1 | N/A |
| PDT000335362.2 | SAMN08717673 | SAMN08717673 | SRR7983734 | GCA 003238415.1 | N/A |
| PDT000335363.2 | SAMN08717680 | SAMN08717680 | SRR7983731 | GCA 003238395.1 | N/A |
| PDT000335364.2 | SAMN08717678 | SAMN08717678 | SRR7983737 | GCA 003238405.1 | N/A |
| PDT000335365.2 | SAMN08717668 | SAMN08717668 | SRR7983578 | GCA 003238455.1 | N/A |
| PDT000335366.2 | SAMN08717666 | SAMN08717666 | SRR7983576 | GCA 003238475.1 | N/A |
| PDT000335367.2 | SAMN08717665 | SAMN08717665 | SRR7983583 | GCA 003238485.1 | N/A |
| PDT000335368.2 | SAMN08717660 | SAMN08717660 | SRR7983605 | GCA 003238525.1 | N/A |
| PDT000335369.2 | SAMN08717661 | SAMN08717661 | SRR7983604 | GCA 003238515.1 | N/A |
| PDT000335370.2 | SAMN08717658 | SAMN08717658 | SRR7983603 | GCA 003238555.1 | N/A |
| PDT000335371.2 | SAMN08717657 | SAMN08717657 | SRR7983600 | GCA 003238575.1 | N/A |
| PDT000335372.2 | SAMN08717654 | SAMN08717654 | SRR7983599 | GCA 003238595.1 | N/A |
| PDT000335373.2 | SAMN08717649 | SAMN08717649 | SRR7983635 | GCA 003238605.1 | N/A |
| PDT000335374.2 | SAMN08717646 | SAMN08717646 | SRR7983636 | GCA 003238635.1 | N/A |
| PDT000335377.2 | SAMN08717642 | SAMN08717642 | SRR7983632 | GCA 003238675.1 | N/A |
| PDT000335378.2 | SAMN08717640 | SAMN08717640 | SRR7983615 | GCA 003238695.1 | N/A |
| PDT000335379.2 | SAMN08717638 | SAMN08717638 | SRR7983607 | GCA 003238735.1 | N/A |
| PDT000335380.2 | SAMN08717637 | SAMN08717637 | SRR7983608 | GCA 003238755.1 | N/A |
| PDT000335381.2 | SAMN08717632 | SAMN08717632 | SRR7983613 | GCA 003238775.1 | N/A |
| PDT000335382.2 | SAMN08717635 | SAMN08717635 | SRR7983610 | GCA 003238765.1 | N/A |
| PDT000335383.2 | SAMN08717627 | SAMN08717627 | SRR7983645 | GCA 003238805.1 | N/A |
| PDT000335384.2 | SAMN08717626 | SAMN08717626 | SRR7983644 | GCA 003238835.1 | N/A |
| PDT000335385.2 | SAMN08717625 | SAMN08717625 | SRR7983643 | GCA 003238845.1 | N/A |
| PDT000335386.2 | SAMN08717623 | SAMN08717623 | SRR7983641 | GCA 003238885.1 | N/A |
| PDT000335388.2 | SAMN08717621 | SAMN08717621 | SRR7983700 | GCA 003238925.1 | N/A |
| PDT000335389.2 | SAMN08717622 | SAMN08717622 | SRR7983640 | GCA 003238915.1 | N/A |
| PDT000335390.2 | SAMN08717614 | SAMN08717614 | SRR7983709 | GCA 003238955.1 | N/A |
| PDT000335391.2 | SAMN08717610 | SAMN08717610 | SRR7983575 | GCA 003238965.1 | N/A |
| PDT000335392.2 | SAMN08717609 | SAMN08717609 | SRR7983566 | GCA 003238995.1 | N/A |
| PDT000335393.2 | SAMN08717607 | SAMN08717607 | SRR7983568 | GCA 003239025.1 | N/A |
| PDT000335394.2 | SAMN08717608 | SAMN08717608 | SRR7983567 | GCA 003239015.1 | N/A |
| PDT000335395.2 | SAMN08717606 | SAMN08717606 | SRR7983569 | GCA 003239055.1 | N/A |
| PDT000335396.2 | SAMN08717603 | SAMN08717603 | SRR7983572 | GCA 003239075.1 | N/A |
| PDT000335397.2 | SAMN08717783 | SAMN08717783 | SRR7983617 | GCA 003239105.1 | N/A |
| PDT000335398.2 | SAMN08717602 | SAMN08717602 | SRR7983573 | GCA 003239095.1 | N/A |
| PDT000335399.2 | SAMN08717781 | SAMN08717781 | SRR7983586 | GCA 003239125.1 | N/A |
| PDT000335400.2 | SAMN08717778 | SAMN08717778 | SRR7983595 | GCA 003239155.1 | N/A |
| PDT000335401.2 | SAMN08717756 | SAMN08717756 | SRR7983725 | GCA 003239175.1 | N/A |
| PDT000335402.2 | SAMN08717753 | SAMN08717753 | SRR7983728 | GCA 003239185.1 | N/A |
| PDT000335403.2 | SAMN08717751 | SAMN08717751 | SRR7983719 | GCA 003239215.1 | N/A |
| PDT000335404.2 | SAMN08717750 | SAMN08717750 | SRR7983718 | GCA 003239235.1 | N/A |
| PDT000335405.2 | SAMN08717737 | SAMN08717737 | SRR7983690 | GCA 003239265.1 | N/A |
| PDT000335406.2 | SAMN08717743 | SAMN08717743 | SRR7983711 | GCA 003239255.1 | N/A |
| PDT000335407.2 | SAMN08717720 | SAMN08717720 | SRR7983651 | GCA 003239295.1 | N/A |

|                |              |              |            |                 |     |
|----------------|--------------|--------------|------------|-----------------|-----|
| PDT000335408.2 | SAMN08717718 | SAMN08717718 | SRR7983657 | GCA 003239315.1 | N/A |
| PDT000335409.2 | SAMN08717717 | SAMN08717717 | SRR7983658 | GCA 003239335.1 | N/A |
| PDT000335410.2 | SAMN08717713 | SAMN08717713 | SRR7983654 | GCA 003239355.1 | N/A |
| PDT000335411.2 | SAMN08717708 | SAMN08717708 | SRR7983624 | GCA 003239385.1 | N/A |
| PDT000335412.2 | SAMN08717712 | SAMN08717712 | SRR7983655 | GCA 003239365.1 | N/A |
| PDT000335413.2 | SAMN08717699 | SAMN08717699 | SRR7983662 | GCA 003239415.1 | N/A |
| PDT000335414.2 | SAMN08717698 | SAMN08717698 | SRR7983663 | GCA 003239435.1 | N/A |
| PDT000335415.2 | SAMN08717695 | SAMN08717695 | SRR7983666 | GCA 003239455.1 | N/A |
| PDT000335416.2 | SAMN08717696 | SAMN08717696 | SRR7983661 | GCA 003239465.1 | N/A |
| PDT000335417.2 | SAMN08717685 | SAMN08717685 | SRR7983685 | GCA 003239505.1 | N/A |
| PDT000335418.2 | SAMN08717688 | SAMN08717688 | SRR7983680 | GCA 003239495.1 | N/A |
| PDT000335419.2 | SAMN08717674 | SAMN08717674 | SRR7983733 | GCA 003239535.1 | N/A |
| PDT000335420.2 | SAMN08717669 | SAMN08717669 | SRR7983579 | GCA 003239555.1 | N/A |
| PDT000335421.2 | SAMN08717664 | SAMN08717664 | SRR7983582 | GCA 003239585.1 | N/A |
| PDT000335422.2 | SAMN08717655 | SAMN08717655 | SRR7983598 | GCA 003239625.1 | N/A |
| PDT000335424.2 | SAMN08717659 | SAMN08717659 | SRR7983602 | GCA 003239615.1 | N/A |
| PDT000335425.2 | SAMN08717652 | SAMN08717652 | SRR7983597 | GCA 003239655.1 | N/A |
| PDT000335426.2 | SAMN08717631 | SAMN08717631 | SRR7983649 | GCA 003239685.1 | N/A |
| PDT000335427.2 | SAMN08717633 | SAMN08717633 | SRR7983612 | GCA 003239675.1 | N/A |
| PDT000335428.2 | SAMN08717630 | SAMN08717630 | SRR7983648 | GCA 003239715.1 | N/A |
| PDT000335429.2 | SAMN08717620 | SAMN08717620 | SRR7983701 | GCA 003239735.1 | N/A |
| PDT000335430.2 | SAMN08717651 | SAMN08717651 | SRR7983639 | GCA 003239745.1 | N/A |
| PDT000335431.2 | SAMN08717615 | SAMN08717615 | SRR7983708 | GCA 003239755.1 | N/A |
| PDT000335432.2 | SAMN08717611 | SAMN08717611 | SRR7983574 | GCA 003239795.1 | N/A |
| PDT000335433.2 | SAMN08717681 | SAMN08717681 | SRR7983730 | GCA 003239815.1 | N/A |
| PDT000335434.2 | SAMN08717605 | SAMN08717605 | SRR7983570 | GCA 003239845.1 | N/A |
| PDT000335435.2 | SAMN08717612 | SAMN08717612 | SRR7983707 | GCA 003239835.1 | N/A |
| PDT000335436.2 | SAMN08717679 | SAMN08717679 | SRR7983736 | GCA 003239855.1 | N/A |
| PDT000335437.2 | SAMN08717677 | SAMN08717677 | SRR7983738 | GCA 003239895.1 | N/A |
| PDT000335438.2 | SAMN08717675 | SAMN08717675 | SRR7983732 | GCA 003239925.1 | N/A |
| PDT000335439.2 | SAMN08717676 | SAMN08717676 | SRR7983739 | GCA 003239915.1 | N/A |
| PDT000335440.2 | SAMN08717672 | SAMN08717672 | SRR7983735 | GCA 003239945.1 | N/A |
| PDT000335441.2 | SAMN08717671 | SAMN08717671 | SRR7983585 | GCA 003239975.1 | N/A |
| PDT000335443.2 | SAMN08717663 | SAMN08717663 | SRR7983581 | GCA 003240005.1 | N/A |
| PDT000335444.2 | SAMN08717662 | SAMN08717662 | SRR7983580 | GCA 003240035.1 | N/A |
| PDT000335445.2 | SAMN08717656 | SAMN08717656 | SRR7983601 | GCA 003240055.1 | N/A |
| PDT000335446.2 | SAMN08717653 | SAMN08717653 | SRR7983596 | GCA 003240075.1 | N/A |
| PDT000335447.2 | SAMN08717648 | SAMN08717648 | SRR7983634 | GCA 003240105.1 | N/A |
| PDT000335448.2 | SAMN08717650 | SAMN08717650 | SRR7983638 | GCA 003240095.1 | N/A |
| PDT000335449.2 | SAMN08717647 | SAMN08717647 | SRR7983637 | GCA 003240135.1 | N/A |
| PDT000335450.2 | SAMN08717643 | SAMN08717643 | SRR7983633 | GCA 003240175.1 | N/A |
| PDT000335451.2 | SAMN08717644 | SAMN08717644 | SRR7983630 | GCA 003240145.1 | N/A |
| PDT000335452.2 | SAMN08717639 | SAMN08717639 | SRR7983606 | GCA 003240185.1 | N/A |
| PDT000335453.2 | SAMN08717636 | SAMN08717636 | SRR7983609 | GCA 003240215.1 | N/A |
| PDT000335454.2 | SAMN08717634 | SAMN08717634 | SRR7983611 | GCA 003240235.1 | N/A |
| PDT000335455.2 | SAMN08717629 | SAMN08717629 | SRR7983647 | GCA 003240245.1 | N/A |
| PDT000335456.2 | SAMN08717628 | SAMN08717628 | SRR7983646 | GCA 003240255.1 | N/A |
| PDT000335458.2 | SAMN08717617 | SAMN08717617 | SRR7983702 | GCA 003240315.1 | N/A |
| PDT000335459.2 | SAMN08717618 | SAMN08717618 | SRR7983705 | GCA 003240325.1 | N/A |
| PDT000335460.2 | SAMN08717616 | SAMN08717616 | SRR7983703 | GCA 003240345.1 | N/A |
| PDT000335461.2 | SAMN08717613 | SAMN08717613 | SRR7983706 | GCA 003240375.1 | N/A |
| PDT000335462.2 | SAMN08717604 | SAMN08717604 | SRR7983571 | GCA 003240395.1 | N/A |
| PDT000335604.2 | SAMN08717777 | SAMN08717777 | SRR7983592 | GCA 003254765.1 | N/A |
| PDT000339864.2 | SAMN04901614 | SAMN04901614 | SRR6985721 | GCA 003260475.1 | N/A |
| PDT000339865.2 | SAMN04901617 | SAMN04901617 | SRR4417443 | GCA 003260465.1 | N/A |
| PDT000339866.2 | SAMN04901608 | SAMN04901608 | SRR4417446 | GCA 003260535.1 | N/A |
| PDT000339867.2 | SAMN04901611 | SAMN04901611 | SRR4417449 | GCA 003260525.1 | N/A |
| PDT000339877.2 | SAMN09428900 | SAMN09428900 | SRR8756094 | GCA 003261195.1 | N/A |
| PDT000343036.2 | SAMEA1531660 | SAMEA1531660 | ERR223162  | GCA 900484515.1 | N/A |
| PDT000343038.2 | SAMEA1531665 | SAMEA1531665 | ERR223160  | GCA 900484255.1 | N/A |
| PDT000343061.2 | SAMEA1466853 | SAMEA1466853 | ERR156434  | GCA 900482825.1 | N/A |
| PDT000343066.2 | SAMEA1466875 | SAMEA1466875 | ERR156438  | GCA 900482605.1 | N/A |
| PDT000343068.2 | SAMEA1466891 | SAMEA1466891 | ERR156472  | GCA 900482685.1 | N/A |
| PDT000343070.2 | SAMEA1466898 | SAMEA1466898 | ERR156435  | GCA 900482795.1 | N/A |
| PDT000343071.2 | SAMEA1466901 | SAMEA1466901 | ERR156463  | GCA 900482815.1 | N/A |
| PDT000343073.2 | SAMEA1466904 | SAMEA1466904 | ERR156456  | GCA 900482555.1 | N/A |
| PDT000343075.2 | SAMEA1466913 | SAMEA1466913 | ERR156457  | GCA 900482745.1 | N/A |
| PDT000343076.2 | SAMEA1466915 | SAMEA1466915 | ERR156437  | GCA 900482565.1 | N/A |

|                |              |              |            |                 |     |
|----------------|--------------|--------------|------------|-----------------|-----|
| PDT000343077.2 | SAMEA1466917 | SAMEA1466917 | ERR156439  | GCA 900482515.1 | N/A |
| PDT000343078.2 | SAMEA1466929 | SAMEA1466929 | ERR156467  | GCA 900482625.1 | N/A |
| PDT000343079.2 | SAMEA1466932 | SAMEA1466932 | ERR156440  | GCA 900482895.1 | N/A |
| PDT000343080.2 | SAMEA1466935 | SAMEA1466935 | ERR156521  | GCA 900482785.1 | N/A |
| PDT000343081.2 | SAMEA1466939 | SAMEA1466939 | ERR156433  | GCA 900482645.1 | N/A |
| PDT000343082.2 | SAMEA1466943 | SAMEA1466943 | ERR156461  | GCA 900482765.1 | N/A |
| PDT000343084.2 | SAMEA1466945 | SAMEA1466945 | ERR156460  | GCA 900482945.1 | N/A |
| PDT000343086.2 | SAMEA1466948 | SAMEA1466948 | ERR156436  | GCA 900482535.1 | N/A |
| PDT000343087.2 | SAMEA1469846 | SAMEA1469846 | ERR159018  | GCA 900483065.1 | N/A |
| PDT000343090.2 | SAMEA1469850 | SAMEA1469850 | ERR158980  | GCA 900482845.1 | N/A |
| PDT000343092.2 | SAMEA1469853 | SAMEA1469853 | ERR159017  | GCA 900482995.1 | N/A |
| PDT000343094.2 | SAMEA1469856 | SAMEA1469856 | ERR159040  | GCA 900483375.1 | N/A |
| PDT000343095.2 | SAMEA1469857 | SAMEA1469857 | ERR159007  | GCA 900483055.1 | N/A |
| PDT000343096.2 | SAMEA1469859 | SAMEA1469859 | ERR159031  | GCA 900483365.1 | N/A |
| PDT000343099.2 | SAMEA1469862 | SAMEA1469862 | ERR159010  | GCA 900482955.1 | N/A |
| PDT000343103.2 | SAMEA1469866 | SAMEA1469866 | ERR159062  | GCA 900483555.1 | N/A |
| PDT000343106.2 | SAMEA1469870 | SAMEA1469870 | ERR159002  | GCA 900482655.1 | N/A |
| PDT000343112.2 | SAMEA1469881 | SAMEA1469881 | ERR159015  | GCA 900482835.1 | N/A |
| PDT000343115.2 | SAMEA1469884 | SAMEA1469884 | ERR159048  | GCA 900483215.1 | N/A |
| PDT000343118.2 | SAMEA1469887 | SAMEA1469887 | ERR159032  | GCA 900483235.1 | N/A |
| PDT000343123.2 | SAMEA1469893 | SAMEA1469893 | ERR159059  | GCA 900483345.1 | N/A |
| PDT000343124.2 | SAMEA1469896 | SAMEA1469896 | ERR159025  | GCA 900483185.1 | N/A |
| PDT000343132.2 | SAMEA1469904 | SAMEA1469904 | ERR159023  | GCA 900483195.1 | N/A |
| PDT000343134.2 | SAMEA1469907 | SAMEA1469907 | ERR159003  | GCA 900482865.1 | N/A |
| PDT000343140.2 | SAMEA1469913 | SAMEA1469913 | ERR159057  | GCA 900483335.1 | N/A |
| PDT000343142.2 | SAMEA1469917 | SAMEA1469917 | ERR159016  | GCA 900483085.1 | N/A |
| PDT000343145.2 | SAMEA1469920 | SAMEA1469920 | ERR159038  | GCA 900483125.1 | N/A |
| PDT000343146.2 | SAMEA1469921 | SAMEA1469921 | ERR159064  | GCA 900483525.1 | N/A |
| PDT000343148.2 | SAMEA1469923 | SAMEA1469923 | ERR159011  | GCA 900482915.1 | N/A |
| PDT000343149.2 | SAMEA1469924 | SAMEA1469924 | ERR159030  | GCA 900483165.1 | N/A |
| PDT000343150.2 | SAMEA1469925 | SAMEA1469925 | ERR159045  | GCA 900483205.1 | N/A |
| PDT000343152.2 | SAMEA1469928 | SAMEA1469928 | ERR159005  | GCA 900482665.1 | N/A |
| PDT000343153.2 | SAMEA1469929 | SAMEA1469929 | ERR159019  | GCA 900483155.1 | N/A |
| PDT000343158.2 | SAMEA1469938 | SAMEA1469938 | ERR159053  | GCA 900483485.1 | N/A |
| PDT000343168.2 | SAMEA1531675 | SAMEA1531675 | ERR177194  | GCA 900483855.1 | N/A |
| PDT000343181.2 | SAMEA1531688 | SAMEA1531688 | ERR177192  | GCA 900483755.1 | N/A |
| PDT000343188.2 | SAMEA1531698 | SAMEA1531698 | ERR177195  | GCA 900484055.1 | N/A |
| PDT000343191.2 | SAMEA1531701 | SAMEA1531701 | ERR355923  | GCA 900484535.1 | N/A |
| PDT000343197.2 | SAMEA1531707 | SAMEA1531707 | ERR177154  | GCA 900483785.1 | N/A |
| PDT000343201.2 | SAMEA1531711 | SAMEA1531711 | ERR177207  | GCA 900484185.1 | N/A |
| PDT000343202.2 | SAMEA1531712 | SAMEA1531712 | ERR177173  | GCA 900483945.1 | N/A |
| PDT000343212.2 | SAMEA1531727 | SAMEA1531727 | ERR177219  | GCA 900484235.1 | N/A |
| PDT000343219.2 | SAMEA1531736 | SAMEA1531736 | ERR177183  | GCA 900483995.1 | N/A |
| PDT000343222.2 | SAMEA1531739 | SAMEA1531739 | ERR177172  | GCA 900483715.1 | N/A |
| PDT000343226.2 | SAMEA1531742 | SAMEA1531742 | ERR177174  | GCA 900483825.1 | N/A |
| PDT000343229.2 | SAMEA1466892 | SAMEA1466892 | ERR156465  | GCA 900490315.1 | N/A |
| PDT000343230.2 | SAMEA1469877 | SAMEA1469877 | ERR159001  | GCA 900490345.1 | N/A |
| PDT000343231.2 | SAMEA1469905 | SAMEA1469905 | ERR159012  | GCA 900490335.1 | N/A |
| PDT000343388.2 | SAMN07291568 | SAMN07291568 | SRR6995019 | GCA 003288395.1 | N/A |
| PDT000352914.2 | SAMEA1469847 | SAMEA1469847 | ERR159037  | GCA 900483305.1 | N/A |
| PDT000352915.2 | SAMEA1469851 | SAMEA1469851 | ERR159070  | GCA 900483895.1 | N/A |
| PDT000355244.2 | SAMN05853512 | SAMN05853512 | SRR4872568 | GCA 003336495.1 | N/A |
| PDT000355245.2 | SAMN05853513 | SAMN05853513 | SRR4872566 | GCA 003336545.1 | N/A |
| PDT000355246.2 | SAMN05853514 | SAMN05853514 | SRR4872565 | GCA 003336555.1 | N/A |
| PDT000355247.2 | SAMN05853516 | SAMN05853516 | SRR4872569 | GCA 003336565.1 | N/A |
| PDT000355248.2 | SAMN05853515 | SAMN05853515 | SRR4872567 | GCA 003336575.1 | N/A |
| PDT000355249.2 | SAMN05853511 | SAMN05853511 | SRR5124384 | GCA 003336635.1 | N/A |
| PDT000355250.2 | SAMN05853510 | SAMN05853510 | SRR4872570 | GCA 003336625.1 | N/A |
| PDT000357917.2 | SAMN05853507 | SAMN05853507 | SRR4426124 | GCA 003343155.1 | N/A |
| PDT000358250.2 | SAMN06820762 | SAMN06820762 | SRR5470163 | GCA 003352765.1 | N/A |
| PDT000371189.2 | SAMD00083438 | SAMD00083438 | DRR107078  | GCA 003417085.1 | N/A |
| PDT000371191.2 | SAMD00083440 | SAMD00083440 | DRR107080  | GCA 003417125.1 | N/A |
| PDT000371192.2 | SAMD00083441 | SAMD00083441 | DRR107081  | GCA 003417145.1 | N/A |
| PDT000371196.2 | SAMD00083445 | SAMD00083445 | DRR107085  | GCA 003417225.1 | N/A |
| PDT000371197.2 | SAMD00083446 | SAMD00083446 | DRR107086  | GCA 003417245.1 | N/A |
| PDT000371198.2 | SAMD00083447 | SAMD00083447 | DRR107087  | GCA 003417265.1 | N/A |
| PDT000371199.2 | SAMD00083448 | SAMD00083448 | DRR107088  | GCA 003417285.1 | N/A |
| PDT000371202.2 | SAMD00083451 | SAMD00083451 | DRR107091  | GCA 003417345.1 | N/A |

|                |              |              |           |                 |     |
|----------------|--------------|--------------|-----------|-----------------|-----|
| PDT000371203.2 | SAMD00083452 | SAMD00083452 | DRR107092 | GCA 003417365.1 | N/A |
| PDT000371213.2 | SAMD00083458 | SAMD00083458 | DRR107098 | GCA 003417635.1 | N/A |
| PDT000371217.2 | SAMD00083460 | SAMD00083460 | DRR107100 | GCA 003417715.1 | N/A |
| PDT000371223.2 | SAMD00083464 | SAMD00083464 | DRR107104 | GCA 003417955.1 | N/A |
| PDT000371228.2 | SAMD00083469 | SAMD00083469 | DRR107109 | GCA 003418245.1 | N/A |
| PDT000371232.2 | SAMD00083473 | SAMD00083473 | DRR107113 | GCA 003418405.1 | N/A |
| PDT000371233.2 | SAMD00083474 | SAMD00083474 | DRR107114 | GCA 003418445.1 | N/A |
| PDT000371236.2 | SAMD00083477 | SAMD00083477 | DRR107117 | GCA 003418565.1 | N/A |
| PDT000371238.2 | SAMD00083479 | SAMD00083479 | DRR107119 | GCA 003418645.1 | N/A |
| PDT000371239.2 | SAMD00083480 | SAMD00083480 | DRR107120 | GCA 003418695.1 | N/A |
| PDT000371244.2 | SAMD00083485 | SAMD00083485 | DRR107125 | GCA 003418875.1 | N/A |
| PDT000371246.2 | SAMD00083486 | SAMD00083486 | DRR107126 | GCA 003418985.1 | N/A |
| PDT000371247.2 | SAMD00083487 | SAMD00083487 | DRR107127 | GCA 003419025.1 | N/A |
| PDT000371252.2 | SAMD00083492 | SAMD00083492 | DRR107132 | GCA 003419205.1 | N/A |
| PDT000371253.2 | SAMD00083493 | SAMD00083493 | DRR107133 | GCA 003419235.1 | N/A |
| PDT000371254.2 | SAMD00083494 | SAMD00083494 | DRR107134 | GCA 003419295.1 | N/A |
| PDT000371255.2 | SAMD00083495 | SAMD00083495 | DRR107135 | GCA 003419355.1 | N/A |
| PDT000371259.2 | SAMD00083499 | SAMD00083499 | DRR107139 | GCA 003419465.1 | N/A |
| PDT000371260.2 | SAMD00083500 | SAMD00083500 | DRR107140 | GCA 003419485.1 | N/A |
| PDT000371263.2 | SAMD00083503 | SAMD00083503 | DRR107143 | GCA 003419545.1 | N/A |
| PDT000371266.2 | SAMD00083506 | SAMD00083506 | DRR107146 | GCA 003419605.1 | N/A |
| PDT000371268.2 | SAMD00083508 | SAMD00083508 | DRR107148 | GCA 003419645.1 | N/A |
| PDT000371270.2 | SAMD00083510 | SAMD00083510 | DRR107150 | GCA 003419685.1 | N/A |
| PDT000371271.2 | SAMD00083511 | SAMD00083511 | DRR107151 | GCA 003419705.1 | N/A |
| PDT000371272.2 | SAMD00083512 | SAMD00083512 | DRR107152 | GCA 003419725.1 | N/A |
| PDT000371273.2 | SAMD00083513 | SAMD00083513 | DRR107153 | GCA 003419745.1 | N/A |
| PDT000371274.2 | SAMD00083514 | SAMD00083514 | DRR107154 | GCA 003419765.1 | N/A |
| PDT000371277.2 | SAMD00083517 | SAMD00083517 | DRR107157 | GCA 003419825.1 | N/A |
| PDT000371286.2 | SAMD00083522 | SAMD00083522 | DRR107162 | GCA 003420025.1 | N/A |
| PDT000371289.2 | SAMD00083526 | SAMD00083526 | DRR107166 | GCA 003420085.1 | N/A |
| PDT000371291.2 | SAMD00083528 | SAMD00083528 | DRR107168 | GCA 003420125.1 | N/A |
| PDT000371297.2 | SAMD00083534 | SAMD00083534 | DRR107174 | GCA 003420245.1 | N/A |
| PDT000371299.2 | SAMD00083536 | SAMD00083536 | DRR107176 | GCA 003420285.1 | N/A |
| PDT000371302.2 | SAMD00083539 | SAMD00083539 | DRR107179 | GCA 003420345.1 | N/A |
| PDT000371303.2 | SAMD00083540 | SAMD00083540 | DRR107180 | GCA 003420365.1 | N/A |
| PDT000371307.2 | SAMD00083544 | SAMD00083544 | DRR107184 | GCA 003420445.1 | N/A |
| PDT000371309.2 | SAMD00083546 | SAMD00083546 | DRR107186 | GCA 003420485.1 | N/A |
| PDT000371311.2 | SAMD00083548 | SAMD00083548 | DRR107188 | GCA 003420525.1 | N/A |
| PDT000371312.2 | SAMD00083549 | SAMD00083549 | DRR107189 | GCA 003420545.1 | N/A |
| PDT000371314.2 | SAMD00083551 | SAMD00083551 | DRR107191 | GCA 003420585.1 | N/A |
| PDT000371315.2 | SAMD00083552 | SAMD00083552 | DRR107192 | GCA 003420605.1 | N/A |
| PDT000371321.2 | SAMD00083556 | SAMD00083556 | DRR107196 | GCA 003420755.1 | N/A |
| PDT000371322.2 | SAMD00083557 | SAMD00083557 | DRR107197 | GCA 003420775.1 | N/A |
| PDT000371324.2 | SAMD00083558 | SAMD00083558 | DRR107198 | GCA 003420825.1 | N/A |
| PDT000371327.2 | SAMD00083561 | SAMD00083561 | DRR107201 | GCA 003420885.1 | N/A |
| PDT000371328.2 | SAMD00083562 | SAMD00083562 | DRR107202 | GCA 003420905.1 | N/A |
| PDT000371337.2 | SAMD00083571 | SAMD00083571 | DRR107211 | GCA 003421085.1 | N/A |
| PDT000371340.2 | SAMD00083574 | SAMD00083574 | DRR107214 | GCA 003421145.1 | N/A |
| PDT000371345.2 | SAMD00083579 | SAMD00083579 | DRR107219 | GCA 003421245.1 | N/A |
| PDT000371346.2 | SAMD00083580 | SAMD00083580 | DRR107220 | GCA 003421265.1 | N/A |
| PDT000371348.2 | SAMD00083582 | SAMD00083582 | DRR107222 | GCA 003421305.1 | N/A |
| PDT000371349.2 | SAMD00083583 | SAMD00083583 | DRR107223 | GCA 003421325.1 | N/A |
| PDT000371350.2 | SAMD00083585 | SAMD00083585 | DRR107225 | GCA 003421365.1 | N/A |
| PDT000371352.2 | SAMD00083587 | SAMD00083587 | DRR107227 | GCA 003421405.1 | N/A |
| PDT000371353.2 | SAMD00083588 | SAMD00083588 | DRR107228 | GCA 003421425.1 | N/A |
| PDT000371354.2 | SAMD00083589 | SAMD00083589 | DRR107229 | GCA 003421445.1 | N/A |
| PDT000371357.2 | SAMD00083592 | SAMD00083592 | DRR107232 | GCA 003421505.1 | N/A |
| PDT000371359.2 | SAMD00083594 | SAMD00083594 | DRR107234 | GCA 003421545.1 | N/A |
| PDT000371360.2 | SAMD00083595 | SAMD00083595 | DRR107235 | GCA 003421565.1 | N/A |
| PDT000371361.2 | SAMD00083596 | SAMD00083596 | DRR107236 | GCA 003421585.1 | N/A |
| PDT000371362.2 | SAMD00083597 | SAMD00083597 | DRR107237 | GCA 003421605.1 | N/A |
| PDT000371365.2 | SAMD00083600 | SAMD00083600 | DRR107240 | GCA 003421665.1 | N/A |
| PDT000371366.2 | SAMD00083601 | SAMD00083601 | DRR107241 | GCA 003421685.1 | N/A |
| PDT000371367.2 | SAMD00083602 | SAMD00083602 | DRR107242 | GCA 003421705.1 | N/A |
| PDT000371368.2 | SAMD00083603 | SAMD00083603 | DRR107243 | GCA 003421725.1 | N/A |
| PDT000371369.2 | SAMD00083604 | SAMD00083604 | DRR107244 | GCA 003421745.1 | N/A |
| PDT000371370.2 | SAMD00083605 | SAMD00083605 | DRR107245 | GCA 003421765.1 | N/A |
| PDT000371371.2 | SAMD00083606 | SAMD00083606 | DRR107246 | GCA 003421785.1 | N/A |

|                |              |              |            |                 |     |
|----------------|--------------|--------------|------------|-----------------|-----|
| PDT000371373.2 | SAMD00083608 | SAMD00083608 | DRR107248  | GCA 003421825.1 | N/A |
| PDT000371374.2 | SAMD00083609 | SAMD00083609 | DRR107249  | GCA 003421845.1 | N/A |
| PDT000371375.2 | SAMD00083610 | SAMD00083610 | DRR107250  | GCA 003421865.1 | N/A |
| PDT000371376.2 | SAMD00083611 | SAMD00083611 | DRR107251  | GCA 003421885.1 | N/A |
| PDT000371377.2 | SAMD00083612 | SAMD00083612 | DRR107252  | GCA 003421905.1 | N/A |
| PDT000371378.2 | SAMD00083613 | SAMD00083613 | DRR107253  | GCA 003421925.1 | N/A |
| PDT000371379.2 | SAMD00083614 | SAMD00083614 | DRR107254  | GCA 003421945.1 | N/A |
| PDT000371380.2 | SAMD00083615 | SAMD00083615 | DRR107255  | GCA 003421965.1 | N/A |
| PDT000371385.2 | SAMD00083620 | SAMD00083620 | DRR107260  | GCA 003422065.1 | N/A |
| PDT000371386.2 | SAMD00083621 | SAMD00083621 | DRR107261  | GCA 003422085.1 | N/A |
| PDT000371387.2 | SAMD00083622 | SAMD00083622 | DRR107262  | GCA 003422105.1 | N/A |
| PDT000371388.2 | SAMD00083623 | SAMD00083623 | DRR107263  | GCA 003422125.1 | N/A |
| PDT000371389.2 | SAMD00083624 | SAMD00083624 | DRR107264  | GCA 003422145.1 | N/A |
| PDT000371390.2 | SAMD00083625 | SAMD00083625 | DRR107265  | GCA 003422165.1 | N/A |
| PDT000371391.2 | SAMD00083626 | SAMD00083626 | DRR107266  | GCA 003422185.1 | N/A |
| PDT000371392.2 | SAMD00083627 | SAMD00083627 | DRR107267  | GCA 003422205.1 | N/A |
| PDT000371393.2 | SAMD00083628 | SAMD00083628 | DRR107268  | GCA 003422225.1 | N/A |
| PDT000371394.2 | SAMD00083629 | SAMD00083629 | DRR107269  | GCA 003422245.1 | N/A |
| PDT000371395.2 | SAMD00083630 | SAMD00083630 | DRR107270  | GCA 003422265.1 | N/A |
| PDT000371397.2 | SAMD00083632 | SAMD00083632 | DRR107272  | GCA 003422305.1 | N/A |
| PDT000371398.2 | SAMD00083633 | SAMD00083633 | DRR107273  | GCA 003422325.1 | N/A |
| PDT000371399.2 | SAMD00083634 | SAMD00083634 | DRR107274  | GCA 003422345.1 | N/A |
| PDT000371400.2 | SAMD00083635 | SAMD00083635 | DRR107275  | GCA 003422365.1 | N/A |
| PDT000371401.2 | SAMD00083636 | SAMD00083636 | DRR107276  | GCA 003422385.1 | N/A |
| PDT000371403.2 | SAMD00083638 | SAMD00083638 | DRR107278  | GCA 003422425.1 | N/A |
| PDT000371405.2 | SAMD00083640 | SAMD00083640 | DRR107280  | GCA 003422465.1 | N/A |
| PDT000371406.2 | SAMD00083641 | SAMD00083641 | DRR107281  | GCA 003422485.1 | N/A |
| PDT000371407.2 | SAMD00083642 | SAMD00083642 | DRR107282  | GCA 003422505.1 | N/A |
| PDT000371414.2 | SAMD00083649 | SAMD00083649 | DRR107289  | GCA 003422645.1 | N/A |
| PDT000371419.2 | SAMD00083654 | SAMD00083654 | DRR107294  | GCA 003422745.1 | N/A |
| PDT000371420.2 | SAMD00083655 | SAMD00083655 | DRR107295  | GCA 003422765.1 | N/A |
| PDT000371422.2 | SAMD00083657 | SAMD00083657 | DRR107297  | GCA 003422805.1 | N/A |
| PDT000371423.2 | SAMD00083658 | SAMD00083658 | DRR107298  | GCA 003422825.1 | N/A |
| PDT000371424.2 | SAMD00083659 | SAMD00083659 | DRR107299  | GCA 003422845.1 | N/A |
| PDT000371425.2 | SAMD00083660 | SAMD00083660 | DRR107300  | GCA 003422865.1 | N/A |
| PDT000371426.2 | SAMD00083661 | SAMD00083661 | DRR107301  | GCA 003422885.1 | N/A |
| PDT000371427.2 | SAMD00083662 | SAMD00083662 | DRR107302  | GCA 003422905.1 | N/A |
| PDT000371429.2 | SAMD00083664 | SAMD00083664 | DRR107304  | GCA 003422945.1 | N/A |
| PDT000371430.2 | SAMD00083665 | SAMD00083665 | DRR107305  | GCA 003422965.1 | N/A |
| PDT000371433.2 | SAMD00083668 | SAMD00083668 | DRR107308  | GCA 003423025.1 | N/A |
| PDT000371434.2 | SAMD00083669 | SAMD00083669 | DRR107309  | GCA 003423045.1 | N/A |
| PDT000371435.2 | SAMD00083670 | SAMD00083670 | DRR107310  | GCA 003423125.1 | N/A |
| PDT000371437.2 | SAMD00083672 | SAMD00083672 | DRR107312  | GCA 003423485.1 | N/A |
| PDT000371438.2 | SAMD00083673 | SAMD00083673 | DRR107313  | GCA 003423505.1 | N/A |
| PDT000371439.2 | SAMD00083674 | SAMD00083674 | DRR107314  | GCA 003423525.1 | N/A |
| PDT000371441.2 | SAMD00083676 | SAMD00083676 | DRR107316  | GCA 003423565.1 | N/A |
| PDT000371444.2 | SAMD00083679 | SAMD00083679 | DRR107319  | GCA 003423625.1 | N/A |
| PDT000371445.2 | SAMD00083680 | SAMD00083680 | DRR107320  | GCA 003423645.1 | N/A |
| PDT000371588.2 | SAMD00083455 | SAMD00083455 | DRR107095  | GCA 003427075.1 | N/A |
| PDT000371589.2 | SAMD00083584 | SAMD00083584 | DRR107224  | GCA 003427095.1 | N/A |
| PDT000371597.2 | SAMEA1531744 | SAMEA1531744 | ERR177156  | GCA 900483685.1 | N/A |
| PDT000383501.2 | SAMD00134209 | SAMD00134209 | DRR160049  | GCA 003573835.1 | N/A |
| PDT000383502.2 | SAMD00134450 | SAMD00134450 | DRR205325  | GCA 003573855.1 | N/A |
| PDT000383750.2 | SAMN09989505 | SAMN09989505 | SRR7825593 | GCA 003581545.1 | N/A |
| PDT000383840.2 | SAMN09989510 | SAMN09989510 | SRR7825590 | GCA 003583785.1 | N/A |
| PDT000383841.2 | SAMN09989509 | SAMN09989509 | SRR7825589 | GCA 003583795.1 | N/A |
| PDT000389186.2 | SAMD00064326 | SAMD00064326 | DRR074680  | GCA 003609855.1 | N/A |
| PDT000408041.2 | SAMN09847833 | SAMN09847833 | SRR7706380 | GCA 003719855.1 | N/A |
| PDT000408042.2 | SAMN09847848 | SAMN09847848 | SRR7706385 | GCA 003719845.1 | N/A |
| PDT000408043.2 | SAMN09847843 | SAMN09847843 | SRR7706367 | GCA 003719905.1 | N/A |
| PDT000408044.2 | SAMN09847821 | SAMN09847821 | SRR7706375 | GCA 003719895.1 | N/A |
| PDT000408046.2 | SAMN09847847 | SAMN09847847 | SRR7706408 | GCA 003719945.1 | N/A |
| PDT000408047.2 | SAMN09847845 | SAMN09847845 | SRR7706384 | GCA 003719965.1 | N/A |
| PDT000408050.2 | SAMN09847835 | SAMN09847835 | SRR7706387 | GCA 003720025.1 | N/A |
| PDT000408051.2 | SAMN09847856 | SAMN09847856 | SRR7706386 | GCA 003720055.1 | N/A |
| PDT000408053.2 | SAMN09847850 | SAMN09847850 | SRR7706361 | GCA 003720085.1 | N/A |
| PDT000408054.2 | SAMN09847860 | SAMN09847860 | SRR7706393 | GCA 003720125.1 | N/A |
| PDT000408055.2 | SAMN09847837 | SAMN09847837 | SRR7706381 | GCA 003720135.1 | N/A |



|                |              |              |            |                 |     |
|----------------|--------------|--------------|------------|-----------------|-----|
| PDT000408056.2 | SAMN09847824 | SAMN09847824 | SRR7706389 | GCA 003720115.1 | N/A |
| PDT000408057.2 | SAMN09847864 | SAMN09847864 | SRR7706404 | GCA 003720175.1 | N/A |
| PDT000408058.2 | SAMN09847831 | SAMN09847831 | SRR7706390 | GCA 003720195.1 | N/A |
| PDT000408060.2 | SAMN09847846 | SAMN09847846 | SRR7706358 | GCA 003720235.1 | N/A |
| PDT000408061.2 | SAMN09847823 | SAMN09847823 | SRR7706383 | GCA 003720245.1 | N/A |
| PDT000408062.2 | SAMN09847804 | SAMN09847804 | SRR7706394 | GCA 003720255.1 | N/A |
| PDT000408063.2 | SAMN09847861 | SAMN09847861 | SRR7706382 | GCA 003720295.1 | N/A |
| PDT000408064.2 | SAMN09847834 | SAMN09847834 | SRR7706356 | GCA 003720305.1 | N/A |
| PDT000408065.2 | SAMN09847849 | SAMN09847849 | SRR7706357 | GCA 003720325.1 | N/A |
| PDT000408066.2 | SAMN09847832 | SAMN09847832 | SRR7706365 | GCA 003720355.1 | N/A |
| PDT000408067.2 | SAMN09847840 | SAMN09847840 | SRR7706360 | GCA 003720375.1 | N/A |
| PDT000408068.2 | SAMN09847842 | SAMN09847842 | SRR7706359 | GCA 003720385.1 | N/A |
| PDT000408069.2 | SAMN09847844 | SAMN09847844 | SRR7706362 | GCA 003720415.1 | N/A |
| PDT000408070.2 | SAMN09847841 | SAMN09847841 | SRR7706363 | GCA 003720445.1 | N/A |
| PDT000408072.2 | SAMN09847867 | SAMN09847867 | SRR7706369 | GCA 003720475.1 | N/A |
| PDT000408073.2 | SAMN09847836 | SAMN09847836 | SRR7706364 | GCA 003720485.1 | N/A |
| PDT000408074.2 | SAMN09847866 | SAMN09847866 | SRR7706368 | GCA 003720515.1 | N/A |
| PDT000408075.2 | SAMN09847865 | SAMN09847865 | SRR7706407 | GCA 003720545.1 | N/A |
| PDT000408076.2 | SAMN09847859 | SAMN09847859 | SRR7706403 | GCA 003720535.1 | N/A |
| PDT000408077.2 | SAMN09847855 | SAMN09847855 | SRR7706406 | GCA 003720575.1 | N/A |
| PDT000408078.2 | SAMN09847858 | SAMN09847858 | SRR7706402 | GCA 003720595.1 | N/A |
| PDT000408079.2 | SAMN09847857 | SAMN09847857 | SRR7706405 | GCA 003720605.1 | N/A |
| PDT000408081.2 | SAMN09847854 | SAMN09847854 | SRR7706416 | GCA 003720655.1 | N/A |
| PDT000408082.2 | SAMN09847852 | SAMN09847852 | SRR7706414 | GCA 003720675.1 | N/A |
| PDT000408090.2 | SAMN09847818 | SAMN09847818 | SRR7706372 | GCA 003720835.1 | N/A |
| PDT000408091.2 | SAMN09847817 | SAMN09847817 | SRR7706379 | GCA 003720845.1 | N/A |
| PDT000408092.2 | SAMN09847816 | SAMN09847816 | SRR7706378 | GCA 003720875.1 | N/A |
| PDT000408093.2 | SAMN09847815 | SAMN09847815 | SRR7706377 | GCA 003720885.1 | N/A |
| PDT000408094.2 | SAMN09847814 | SAMN09847814 | SRR7706376 | GCA 003720915.1 | N/A |
| PDT000408095.2 | SAMN09847813 | SAMN09847813 | SRR7706392 | GCA 003720935.1 | N/A |
| PDT000408096.2 | SAMN09847805 | SAMN09847805 | SRR7706395 | GCA 003720945.1 | N/A |
| PDT000408097.2 | SAMN09847812 | SAMN09847812 | SRR7706391 | GCA 003720975.1 | N/A |
| PDT000408098.2 | SAMN09847810 | SAMN09847810 | SRR7706400 | GCA 003720995.1 | N/A |
| PDT000408099.2 | SAMN09847811 | SAMN09847811 | SRR7706401 | GCA 003721005.1 | N/A |
| PDT000408100.2 | SAMN09847808 | SAMN09847808 | SRR7706398 | GCA 003721035.1 | N/A |
| PDT000408101.2 | SAMN09847807 | SAMN09847807 | SRR7706397 | GCA 003721055.1 | N/A |
| PDT000408102.2 | SAMN09847809 | SAMN09847809 | SRR7706399 | GCA 003721075.1 | N/A |
| PDT000408103.2 | SAMN09847806 | SAMN09847806 | SRR7706396 | GCA 003721095.1 | N/A |
| PDT000408104.2 | SAMN10373330 | SAMN10373330 | SRR8174579 | GCA 003721115.1 | N/A |
| PDT000408136.2 | SAMN10170277 | SAMN10170277 | SRR8351770 | GCA 003724015.1 | N/A |
| PDT000413280.2 | SAMN10163180 | SAMN10163180 | SRR8178101 | GCA 003827915.1 | N/A |
| PDT000413405.2 | SAMD00009748 | SAMD00009748 | DRR015671  | GCA 003850765.1 | N/A |
| PDT000413406.2 | SAMD00002817 | SAMD00002817 | DRR016177  | GCA 003850785.1 | N/A |
| PDT000418300.2 | SAMN10163197 | SAMN10163197 | SRR8179226 | GCA 003937725.1 | N/A |
| PDT000418343.2 | SAMN10163196 | SAMN10163196 | SRR8179213 | GCA 003938815.1 | N/A |
| PDT000423384.1 | SAMEA4469677 | SAMEA4469677 | ERR1795902 | GCA 015608745.1 | N/A |
| PDT000423386.1 | SAMEA4469679 | SAMEA4469679 | ERR1795904 | GCA 015608665.1 | N/A |
| PDT000423387.1 | SAMEA4469680 | SAMEA4469680 | ERR1795905 | GCA 015608825.1 | N/A |
| PDT000423388.1 | SAMEA4469681 | SAMEA4469681 | ERR1795906 | GCA 015608535.1 | N/A |
| PDT000423389.1 | SAMEA4469682 | SAMEA4469682 | ERR1795907 | GCA 015608705.1 | N/A |
| PDT000423390.1 | SAMEA4469683 | SAMEA4469683 | ERR1795908 | GCA 015608785.1 | N/A |
| PDT000423391.1 | SAMEA4469684 | SAMEA4469684 | ERR1795909 | GCA 015608765.1 | N/A |
| PDT000423392.1 | SAMEA4469685 | SAMEA4469685 | ERR1795910 | GCA 015608565.1 | N/A |
| PDT000423393.1 | SAMEA4469686 | SAMEA4469686 | ERR1795911 | GCA 015608605.1 | N/A |
| PDT000423394.1 | SAMEA4469687 | SAMEA4469687 | ERR1795912 | GCA 015608685.1 | N/A |
| PDT000423395.1 | SAMEA4469688 | SAMEA4469688 | ERR1795913 | GCA 015608625.1 | N/A |
| PDT000423398.1 | SAMEA4469691 | SAMEA4469691 | ERR1795916 | GCA 015608845.1 | N/A |
| PDT000423402.1 | SAMEA4469695 | SAMEA4469695 | ERR1795920 | GCA 015608525.1 | N/A |
| PDT000423403.1 | SAMEA4469696 | SAMEA4469696 | ERR1795921 | GCA 015608485.1 | N/A |
| PDT000423406.1 | SAMEA4469699 | SAMEA4469699 | ERR1795924 | GCA 015608365.1 | N/A |
| PDT000423407.1 | SAMEA4469700 | SAMEA4469700 | ERR1795925 | GCA 015608345.1 | N/A |
| PDT000423408.1 | SAMEA4469701 | SAMEA4469701 | ERR1795926 | GCA 015608265.1 | N/A |
| PDT000423409.1 | SAMEA4469704 | SAMEA4469704 | ERR1795927 | GCA 015608425.1 | N/A |
| PDT000423411.1 | SAMEA4469709 | SAMEA4469709 | ERR1795929 | GCA 015608405.1 | N/A |
| PDT000423413.1 | SAMEA4469713 | SAMEA4469713 | ERR1795931 | GCA 015608325.1 | N/A |
| PDT000423414.1 | SAMEA4469737 | SAMEA4469737 | ERR1795932 | GCA 015608225.1 | N/A |
| PDT000423416.1 | SAMEA4469743 | SAMEA4469743 | ERR1795934 | GCA 015608125.1 | N/A |
| PDT000423417.1 | SAMEA4469752 | SAMEA4469752 | ERR1795935 | GCA 015608145.1 | N/A |

|                |              |              |            |                 |     |
|----------------|--------------|--------------|------------|-----------------|-----|
| PDT000423418.1 | SAMEA4469755 | SAMEA4469755 | ERR1795936 | GCA 015608165.1 | N/A |
| PDT000423419.1 | SAMEA4469762 | SAMEA4469762 | ERR1795937 | GCA 015608085.1 | N/A |
| PDT000423420.1 | SAMEA4469702 | SAMEA4469702 | ERR1800519 | GCA 015608105.1 | N/A |
| PDT000423421.1 | SAMEA4469703 | SAMEA4469703 | ERR1800520 | GCA 015608005.1 | N/A |
| PDT000423423.1 | SAMEA4469708 | SAMEA4469708 | ERR1800522 | GCA 015608065.1 | N/A |
| PDT000423424.1 | SAMEA4469710 | SAMEA4469710 | ERR1800523 | GCA 015607665.1 | N/A |
| PDT000423425.1 | SAMEA4469712 | SAMEA4469712 | ERR1800524 | GCA 015607035.1 | N/A |
| PDT000423426.1 | SAMEA4469714 | SAMEA4469714 | ERR1800525 | GCA 015607095.1 | N/A |
| PDT000423427.1 | SAMEA4469715 | SAMEA4469715 | ERR1800526 | GCA 015608205.1 | N/A |
| PDT000423428.1 | SAMEA4469716 | SAMEA4469716 | ERR1800527 | GCA 015607365.1 | N/A |
| PDT000423431.1 | SAMEA4469719 | SAMEA4469719 | ERR1800530 | GCA 015607565.1 | N/A |
| PDT000423432.1 | SAMEA4469720 | SAMEA4469720 | ERR1800531 | GCA 015607145.1 | N/A |
| PDT000423434.1 | SAMEA4469722 | SAMEA4469722 | ERR1800533 | GCA 015607545.1 | N/A |
| PDT000423435.1 | SAMEA4469723 | SAMEA4469723 | ERR1800534 | GCA 015607965.1 | N/A |
| PDT000423436.1 | SAMEA4469724 | SAMEA4469724 | ERR1800535 | GCA 015608045.1 | N/A |
| PDT000423437.1 | SAMEA4469725 | SAMEA4469725 | ERR1800536 | GCA 015607985.1 | N/A |
| PDT000423440.1 | SAMEA4469728 | SAMEA4469728 | ERR1800539 | GCA 015607885.1 | N/A |
| PDT000423441.1 | SAMEA4469729 | SAMEA4469729 | ERR1800540 | GCA 015607865.1 | N/A |
| PDT000423442.1 | SAMEA4469730 | SAMEA4469730 | ERR1800541 | GCA 015607905.1 | N/A |
| PDT000423443.1 | SAMEA4469731 | SAMEA4469731 | ERR1800542 | GCA 015607825.1 | N/A |
| PDT000423444.1 | SAMEA4469732 | SAMEA4469732 | ERR1800543 | GCA 015607765.1 | N/A |
| PDT000423445.1 | SAMEA4469733 | SAMEA4469733 | ERR1800544 | GCA 015607785.1 | N/A |
| PDT000423446.1 | SAMEA4469734 | SAMEA4469734 | ERR1800545 | GCA 015607705.1 | N/A |
| PDT000423447.1 | SAMEA4469735 | SAMEA4469735 | ERR1800546 | GCA 015607845.1 | N/A |
| PDT000423448.1 | SAMEA4469736 | SAMEA4469736 | ERR1800547 | GCA 015607725.1 | N/A |
| PDT000423449.1 | SAMEA4469738 | SAMEA4469738 | ERR1800548 | GCA 015607745.1 | N/A |
| PDT000423450.1 | SAMEA4469739 | SAMEA4469739 | ERR1800549 | GCA 015607685.1 | N/A |
| PDT000423452.1 | SAMEA4469742 | SAMEA4469742 | ERR1800551 | GCA 015607605.1 | N/A |
| PDT000423453.1 | SAMEA4469744 | SAMEA4469744 | ERR1800552 | GCA 015607625.1 | N/A |
| PDT000423454.1 | SAMEA4469745 | SAMEA4469745 | ERR1800553 | GCA 015607585.1 | N/A |
| PDT000423455.1 | SAMEA4469746 | SAMEA4469746 | ERR1800554 | GCA 015607525.1 | N/A |
| PDT000423456.1 | SAMEA4469747 | SAMEA4469747 | ERR1800555 | GCA 015607485.1 | N/A |
| PDT000423457.1 | SAMEA4469748 | SAMEA4469748 | ERR1800556 | GCA 015607505.1 | N/A |
| PDT000423461.1 | SAMEA4469753 | SAMEA4469753 | ERR1800560 | GCA 015607425.1 | N/A |
| PDT000423462.1 | SAMEA4469754 | SAMEA4469754 | ERR1800561 | GCA 015607385.1 | N/A |
| PDT000423463.1 | SAMEA4469756 | SAMEA4469756 | ERR1800562 | GCA 015607325.1 | N/A |
| PDT000423464.1 | SAMEA4469757 | SAMEA4469757 | ERR1800563 | GCA 015607285.1 | N/A |
| PDT000423465.1 | SAMEA4469758 | SAMEA4469758 | ERR1800564 | GCA 015607305.1 | N/A |
| PDT000423466.1 | SAMEA4469759 | SAMEA4469759 | ERR1800565 | GCA 015607025.1 | N/A |
| PDT000423467.1 | SAMEA4469760 | SAMEA4469760 | ERR1800566 | GCA 015607245.1 | N/A |
| PDT000423468.1 | SAMEA4469761 | SAMEA4469761 | ERR1800567 | GCA 015607265.1 | N/A |
| PDT000423469.1 | SAMEA4469763 | SAMEA4469763 | ERR1800568 | GCA 015607205.1 | N/A |
| PDT000423470.1 | SAMEA4469764 | SAMEA4469764 | ERR1800569 | GCA 015607185.1 | N/A |
| PDT000423472.1 | SAMEA4469766 | SAMEA4469766 | ERR1800571 | GCA 015607165.1 | N/A |
| PDT000423815.1 | SAMEA4469767 | SAMEA4469767 | ERR1853116 | GCA 015607065.1 | N/A |
| PDT000423816.1 | SAMEA4469768 | SAMEA4469768 | ERR1853117 | GCA 015606975.1 | N/A |
| PDT000423817.1 | SAMEA4469769 | SAMEA4469769 | ERR1853118 | GCA 015607085.1 | N/A |
| PDT000423818.1 | SAMEA4469770 | SAMEA4469770 | ERR1853119 | GCA 015607125.1 | N/A |
| PDT000423821.1 | SAMEA4469773 | SAMEA4469773 | ERR1853122 | GCA 015606725.1 | N/A |
| PDT000423824.1 | SAMEA4469776 | SAMEA4469776 | ERR1853125 | GCA 015606845.1 | N/A |
| PDT000423825.1 | SAMEA4469777 | SAMEA4469777 | ERR1853126 | GCA 015606965.1 | N/A |
| PDT000423826.1 | SAMEA4469778 | SAMEA4469778 | ERR1853127 | GCA 015606905.1 | N/A |
| PDT000423827.1 | SAMEA4469779 | SAMEA4469779 | ERR1853128 | GCA 015606865.1 | N/A |
| PDT000423828.1 | SAMEA4469780 | SAMEA4469780 | ERR1853129 | GCA 015606885.1 | N/A |
| PDT000423829.1 | SAMEA4469781 | SAMEA4469781 | ERR1853130 | GCA 015606925.1 | N/A |
| PDT000423830.1 | SAMEA4469782 | SAMEA4469782 | ERR1853131 | GCA 015606945.1 | N/A |
| PDT000423831.1 | SAMEA4469783 | SAMEA4469783 | ERR1853132 | GCA 015606765.1 | N/A |
| PDT000423832.1 | SAMEA4469784 | SAMEA4469784 | ERR1853133 | GCA 015606745.1 | N/A |
| PDT000423833.1 | SAMEA4469785 | SAMEA4469785 | ERR1853134 | GCA 015606825.1 | N/A |
| PDT000423834.1 | SAMEA4469786 | SAMEA4469786 | ERR1853135 | GCA 015606785.1 | N/A |
| PDT000423835.1 | SAMEA4469787 | SAMEA4469787 | ERR1853136 | GCA 015606705.1 | N/A |
| PDT000423836.1 | SAMEA4469788 | SAMEA4469788 | ERR1853137 | GCA 015606685.1 | N/A |
| PDT000423837.1 | SAMEA4469789 | SAMEA4469789 | ERR1853138 | GCA 015606665.1 | N/A |
| PDT000423838.1 | SAMEA4469790 | SAMEA4469790 | ERR1853139 | GCA 015605165.1 | N/A |
| PDT000423839.1 | SAMEA4469791 | SAMEA4469791 | ERR1853140 | GCA 015605185.1 | N/A |
| PDT000423840.1 | SAMEA4469792 | SAMEA4469792 | ERR1853141 | GCA 015606605.1 | N/A |
| PDT000423841.1 | SAMEA4469793 | SAMEA4469793 | ERR1853142 | GCA 015605145.1 | N/A |
| PDT000423842.1 | SAMEA4469794 | SAMEA4469794 | ERR1853143 | GCA 015605205.1 | N/A |

|                |                |                |             |                 |     |
|----------------|----------------|----------------|-------------|-----------------|-----|
| PDT000431018.2 | SAMN07666475   | SAMN07666475   | SRR8648187  | GCA 003850085.1 | N/A |
| PDT000431120.2 | SAMN10638817   | SAMN10638817   | SRR8365206  | GCA 003989645.1 | N/A |
| PDT000431177.2 | SAMN09220587   | SAMN09220587   | SRR7179412  | GCA 003991015.1 | N/A |
| PDT000444200.1 | SAMEA53017168  | SAMEA53017168  | ERR2506124  | GCA 015605105.1 | N/A |
| PDT000444210.1 | SAMEA53024668  | SAMEA53024668  | ERR2506134  | GCA 015606435.1 | N/A |
| PDT000444212.1 | SAMEA53026168  | SAMEA53026168  | ERR2506136  | GCA 015606365.1 | N/A |
| PDT000444213.1 | SAMEA53026918  | SAMEA53026918  | ERR2506137  | GCA 015606345.1 | N/A |
| PDT000444214.1 | SAMEA53027668  | SAMEA53027668  | ERR2506138  | GCA 015606405.1 | N/A |
| PDT000444215.1 | SAMEA53029168  | SAMEA53029168  | ERR2506139  | GCA 015606375.1 | N/A |
| PDT000444216.1 | SAMEA53029918  | SAMEA53029918  | ERR2506140  | GCA 015606325.1 | N/A |
| PDT000444217.1 | SAMEA53030668  | SAMEA53030668  | ERR2506141  | GCA 015606265.1 | N/A |
| PDT000444222.1 | SAMEA53034418  | SAMEA53034418  | ERR2506146  | GCA 015606225.1 | N/A |
| PDT000444227.1 | SAMEA53038918  | SAMEA53038918  | ERR2506151  | GCA 015606145.1 | N/A |
| PDT000444235.1 | SAMEA53044918  | SAMEA53044918  | ERR2506159  | GCA 015606065.1 | N/A |
| PDT000444238.1 | SAMEA53047168  | SAMEA53047168  | ERR2506162  | GCA 015605935.1 | N/A |
| PDT000444248.1 | SAMEA53054668  | SAMEA53054668  | ERR2506172  | GCA 015605725.1 | N/A |
| PDT000444253.1 | SAMEA53059168  | SAMEA53059168  | ERR2506177  | GCA 015605745.1 | N/A |
| PDT000444260.1 | SAMEA53064418  | SAMEA53064418  | ERR2506184  | GCA 015605505.1 | N/A |
| PDT000444262.1 | SAMEA53065918  | SAMEA53065918  | ERR2506186  | GCA 015605585.1 | N/A |
| PDT000444268.1 | SAMEA53070418  | SAMEA53070418  | ERR2506192  | GCA 015605545.1 | N/A |
| PDT000444272.1 | SAMEA53073418  | SAMEA53073418  | ERR2506196  | GCA 015605525.1 | N/A |
| PDT000444274.1 | SAMEA53075668  | SAMEA53075668  | ERR2506198  | GCA 015605465.1 | N/A |
| PDT000444279.1 | SAMEA53079418  | SAMEA53079418  | ERR2506203  | GCA 015606645.1 | N/A |
| PDT000460533.2 | SAMEA5099550   | SAMEA5099550   | ERR2929422  | GCA 900620215.1 | N/A |
| PDT000460534.2 | SAMEA5099551   | SAMEA5099551   | ERR2929423  | GCA 900620225.1 | N/A |
| PDT000460535.2 | SAMEA5099552   | SAMEA5099552   | ERR2929424  | GCA 900620235.1 | N/A |
| PDT000460536.2 | SAMEA5099553   | SAMEA5099553   | ERR2929425  | GCA 900620245.1 | N/A |
| PDT000460537.2 | SAMEA5099554   | SAMEA5099554   | ERR2929426  | GCA 900620255.1 | N/A |
| PDT000466562.2 | SAMN10838464   | SAMN10838464   | SRR8501288  | GCA 004152675.1 | N/A |
| PDT000466563.2 | SAMN10838476   | SAMN10838476   | SRR8501294  | GCA 004152765.1 | N/A |
| PDT000466731.2 | SAMN10838474   | SAMN10838474   | SRR8501292  | GCA 004167955.1 | N/A |
| PDT000466741.2 | SAMN10838475   | SAMN10838475   | SRR8501293  | GCA 004168155.1 | N/A |
| PDT000466742.2 | SAMN10838477   | SAMN10838477   | SRR8501295  | GCA 004168185.1 | N/A |
| PDT000468714.2 | SAMN10464026   | SAMN10464026   | SRR8583490  | GCA 004209875.1 | N/A |
| PDT000471969.2 | SAMN06925305   | SAMN06925305   | SRR5520614  | GCA 004295725.1 | N/A |
| PDT000490163.2 | SAMN11360115   | SAMN11360115   | SRR8923025  | GCA 004785995.1 | N/A |
| PDT000498537.2 | SAMN11458130   | SAMN11458130   | SRR8925536  | GCA 005047485.1 | N/A |
| PDT000498557.2 | SAMN11458133   | SAMN11458133   | SRR8925277  | GCA 005047995.1 | N/A |
| PDT000498568.2 | SAMN11458138   | SAMN11458138   | SRR8925289  | GCA 005048295.1 | N/A |
| PDT000498569.2 | SAMN11458129   | SAMN11458129   | SRR8925601  | GCA 005048305.1 | N/A |
| PDT000498572.3 | SAMN11458143   | SAMN11458143   | SRR8925288  | GCA 005048375.2 | N/A |
| PDT000498576.2 | SAMN11458132   | SAMN11458132   | SRR8925292  | GCA 005048455.1 | N/A |
| PDT000498597.3 | SAMN11458148   | SAMN11458148   | SRR8925287  | GCA 005048925.2 | N/A |
| PDT000514615.3 | SAMN11096691   | SAMN11096691   | SRR14831795 | GCA 005075635.1 | N/A |
| PDT000514622.3 | SAMN11080858   | SAMN11080858   | SRR14690946 | GCA 005706035.1 | N/A |
| PDT000514636.3 | SAMN11096030   | SAMN11096030   | SRR15497842 | GCA 005706855.1 | N/A |
| PDT000514642.3 | SAMN11096191   | SAMN11096191   | SRR9694130  | GCA 005707215.1 | N/A |
| PDT000518795.3 | SAMN11605646   | SAMN11605646   | SRR9141411  | GCA 005931015.2 | N/A |
| PDT000518796.3 | SAMN11605647   | SAMN11605647   | SRR9141593  | GCA 005931035.2 | N/A |
| PDT000518797.3 | SAMN11611368   | SAMN11611368   | SRR9150090  | GCA 005931055.2 | N/A |
| PDT000531906.2 | SAMN11056481   | SAMN11056481   | SRR9641507  | GCA 006364775.1 | N/A |
| PDT000534120.2 | SAMN12070258   | SAMN12070258   | SRR9307301  | GCA 006385695.1 | N/A |
| PDT000538359.1 | SAMEA104452076 | SAMEA104452076 | ERR2232566  | GCA 015604325.1 | N/A |
| PDT000538360.1 | SAMEA104452077 | SAMEA104452077 | ERR2232568  | GCA 015604305.1 | N/A |
| PDT000538361.1 | SAMEA104452078 | SAMEA104452078 | ERR2232569  | GCA 015604285.1 | N/A |
| PDT000538362.1 | SAMEA104452079 | SAMEA104452079 | ERR2232571  | GCA 015604265.1 | N/A |
| PDT000538363.1 | SAMEA104452080 | SAMEA104452080 | ERR2232573  | GCA 015604245.1 | N/A |
| PDT000538365.1 | SAMEA104452082 | SAMEA104452082 | ERR2232575  | GCA 015604125.1 | N/A |
| PDT000538366.1 | SAMEA104452083 | SAMEA104452083 | ERR2232577  | GCA 015604205.1 | N/A |
| PDT000538367.1 | SAMEA104452084 | SAMEA104452084 | ERR2232579  | GCA 015604185.1 | N/A |
| PDT000538368.1 | SAMEA104452085 | SAMEA104452085 | ERR2232580  | GCA 015604165.1 | N/A |
| PDT000538370.1 | SAMEA104452087 | SAMEA104452087 | ERR2232583  | GCA 015603945.1 | N/A |
| PDT000538371.1 | SAMEA104452088 | SAMEA104452088 | ERR2232584  | GCA 015604065.1 | N/A |
| PDT000538372.1 | SAMEA104452089 | SAMEA104452089 | ERR2232585  | GCA 015603885.1 | N/A |
| PDT000538373.1 | SAMEA104452090 | SAMEA104452090 | ERR2232587  | GCA 015604025.1 | N/A |
| PDT000538374.1 | SAMEA104452091 | SAMEA104452091 | ERR2232588  | GCA 015604045.1 | N/A |
| PDT000538375.1 | SAMEA104452092 | SAMEA104452092 | ERR2232589  | GCA 015603985.1 | N/A |
| PDT000538376.1 | SAMEA104452093 | SAMEA104452093 | ERR2232590  | GCA 015603965.1 | N/A |

|                |                |                |             |                 |     |
|----------------|----------------|----------------|-------------|-----------------|-----|
| PDT000538377.1 | SAMEA104452094 | SAMEA104452094 | ERR2232591  | GCA 015604145.1 | N/A |
| PDT000538378.1 | SAMEA104452095 | SAMEA104452095 | ERR2232593  | GCA 015603905.1 | N/A |
| PDT000538380.1 | SAMEA104452097 | SAMEA104452097 | ERR2232595  | GCA 015604085.1 | N/A |
| PDT000538381.1 | SAMEA104452098 | SAMEA104452098 | ERR2232596  | GCA 015604005.1 | N/A |
| PDT000538383.1 | SAMEA104452100 | SAMEA104452100 | ERR2232598  | GCA 015603925.1 | N/A |
| PDT000538385.1 | SAMEA104452102 | SAMEA104452102 | ERR2232600  | GCA 015604845.1 | N/A |
| PDT000538388.1 | SAMEA104452105 | SAMEA104452105 | ERR2232603  | GCA 015603825.1 | N/A |
| PDT000538390.1 | SAMEA104452107 | SAMEA104452107 | ERR2232605  | GCA 015603805.1 | N/A |
| PDT000538392.1 | SAMEA104452109 | SAMEA104452109 | ERR2232607  | GCA 015603725.1 | N/A |
| PDT000538394.1 | SAMEA104452111 | SAMEA104452111 | ERR2232609  | GCA 015603865.1 | N/A |
| PDT000538396.1 | SAMEA104452113 | SAMEA104452113 | ERR2232611  | GCA 015603325.1 | N/A |
| PDT000538398.1 | SAMEA104452115 | SAMEA104452115 | ERR2232613  | GCA 015603785.1 | N/A |
| PDT000538400.1 | SAMEA104452117 | SAMEA104452117 | ERR2232615  | GCA 015602905.1 | N/A |
| PDT000538402.1 | SAMEA104452119 | SAMEA104452119 | ERR2232619  | GCA 015603225.1 | N/A |
| PDT000538404.1 | SAMEA104452121 | SAMEA104452121 | ERR2232621  | GCA 015603085.1 | N/A |
| PDT000538406.1 | SAMEA104452123 | SAMEA104452123 | ERR2232623  | GCA 015603295.1 | N/A |
| PDT000538407.1 | SAMEA104452124 | SAMEA104452124 | ERR2232624  | GCA 015603105.1 | N/A |
| PDT000538409.1 | SAMEA104452126 | SAMEA104452126 | ERR2232626  | GCA 015603065.1 | N/A |
| PDT000538411.1 | SAMEA104452128 | SAMEA104452128 | ERR2232628  | GCA 015603025.1 | N/A |
| PDT000538412.1 | SAMEA104452129 | SAMEA104452129 | ERR2232629  | GCA 015603245.1 | N/A |
| PDT000538414.1 | SAMEA104452131 | SAMEA104452131 | ERR2232631  | GCA 015602735.1 | N/A |
| PDT000538416.1 | SAMEA104452133 | SAMEA104452133 | ERR2232633  | GCA 015603465.1 | N/A |
| PDT000538418.1 | SAMEA104452135 | SAMEA104452135 | ERR2232635  | GCA 015602765.1 | N/A |
| PDT000538420.1 | SAMEA104452137 | SAMEA104452137 | ERR2232637  | GCA 015603765.1 | N/A |
| PDT000538422.1 | SAMEA104452139 | SAMEA104452139 | ERR2232639  | GCA 015603745.1 | N/A |
| PDT000538423.1 | SAMEA104452140 | SAMEA104452140 | ERR2232640  | GCA 015603705.1 | N/A |
| PDT000538427.1 | SAMEA104452144 | SAMEA104452144 | ERR2232644  | GCA 015603585.1 | N/A |
| PDT000538430.1 | SAMEA104452147 | SAMEA104452147 | ERR2232647  | GCA 015603625.1 | N/A |
| PDT000538432.1 | SAMEA104452149 | SAMEA104452149 | ERR2232649  | GCA 015603665.1 | N/A |
| PDT000538434.1 | SAMEA104452151 | SAMEA104452151 | ERR2232651  | GCA 015603565.1 | N/A |
| PDT000538435.1 | SAMEA104452152 | SAMEA104452152 | ERR2232652  | GCA 015603635.1 | N/A |
| PDT000538439.1 | SAMEA104452156 | SAMEA104452156 | ERR2232656  | GCA 015603545.1 | N/A |
| PDT000538441.1 | SAMEA104452158 | SAMEA104452158 | ERR2232658  | GCA 015603525.1 | N/A |
| PDT000538442.1 | SAMEA104452159 | SAMEA104452159 | ERR2232659  | GCA 015603685.1 | N/A |
| PDT000538444.1 | SAMEA104452161 | SAMEA104452161 | ERR2232661  | GCA 015603505.1 | N/A |
| PDT000538452.1 | SAMEA104452169 | SAMEA104452169 | ERR2232673  | GCA 015603425.1 | N/A |
| PDT000538453.1 | SAMEA104452170 | SAMEA104452170 | ERR2232674  | GCA 015603445.1 | N/A |
| PDT000538455.1 | SAMEA104452172 | SAMEA104452172 | ERR2232676  | GCA 015603365.1 | N/A |
| PDT000538456.1 | SAMEA104452173 | SAMEA104452173 | ERR2232677  | GCA 015603405.1 | N/A |
| PDT000538459.1 | SAMEA104452176 | SAMEA104452176 | ERR2232681  | GCA 015603385.1 | N/A |
| PDT000538467.1 | SAMEA104452184 | SAMEA104452184 | ERR2232691  | GCA 015603285.1 | N/A |
| PDT000538469.1 | SAMEA104452186 | SAMEA104452186 | ERR2232693  | GCA 015603125.1 | N/A |
| PDT000538470.1 | SAMEA104452187 | SAMEA104452187 | ERR2232695  | GCA 015603265.1 | N/A |
| PDT000538472.1 | SAMEA104452189 | SAMEA104452189 | ERR2232700  | GCA 015603205.1 | N/A |
| PDT000538473.1 | SAMEA104452190 | SAMEA104452190 | ERR2232701  | GCA 015602725.1 | N/A |
| PDT000538474.1 | SAMEA104452191 | SAMEA104452191 | ERR2232703  | GCA 015603145.1 | N/A |
| PDT000538475.1 | SAMEA104452192 | SAMEA104452192 | ERR2232705  | GCA 015603185.1 | N/A |
| PDT000544175.2 | SAMEA4623346   | SAMEA4623346   | ERR3403341  | GCA 902166055.1 | N/A |
| PDT000550211.2 | SAMD00172962   | SAMD00172962   | DRR180574   | GCA 007185035.1 | N/A |
| PDT000551365.1 | SAMN12414141   | SAMN12414141   | SRR9860654  | GCA 015602845.1 | N/A |
| PDT000578271.2 | SAMN12622398   | SAMN12622398   | SRR10014029 | GCA 008123495.1 | N/A |
| PDT000581686.1 | SAMN09400966   | SAMN09400966   | SRR7296984  | GCA 015602605.1 | N/A |
| PDT000581864.1 | SAMN09400984   | SAMN09400984   | SRR7297162  | GCA 015602525.1 | N/A |
| PDT000581940.1 | SAMN09401011   | SAMN09401011   | SRR7297238  | GCA 015602485.1 | N/A |
| PDT000581943.1 | SAMN09401016   | SAMN09401016   | SRR7297241  | GCA 015602505.1 | N/A |
| PDT000582111.1 | SAMN09400973   | SAMN09400973   | SRR7297409  | GCA 015602465.1 | N/A |
| PDT000589501.1 | SAMN04505146   | SAMN04505146   | SRR3194885  | GCA 015602245.1 | N/A |
| PDT000589502.1 | SAMN04505147   | SAMN04505147   | SRR3194886  | GCA 015602215.1 | N/A |
| PDT000589503.1 | SAMN04505148   | SAMN04505148   | SRR3194887  | GCA 015602325.1 | N/A |
| PDT000589504.1 | SAMN04505149   | SAMN04505149   | SRR3194888  | GCA 015602385.1 | N/A |
| PDT000589511.1 | SAMN04505156   | SAMN04505156   | SRR3194895  | GCA 015602045.1 | N/A |
| PDT000589520.1 | SAMN04505165   | SAMN04505165   | SRR3194904  | GCA 015601805.1 | N/A |
| PDT000589523.1 | SAMN04505168   | SAMN04505168   | SRR3194907  | GCA 015601785.1 | N/A |
| PDT000589524.1 | SAMN04505169   | SAMN04505169   | SRR3194908  | GCA 015601745.1 | N/A |
| PDT000589529.1 | SAMN04505174   | SAMN04505174   | SRR3194913  | GCA 015601665.1 | N/A |
| PDT000589535.1 | SAMN04505180   | SAMN04505180   | SRR3194919  | GCA 015601495.1 | N/A |
| PDT000589541.1 | SAMN04505186   | SAMN04505186   | SRR3194925  | GCA 015601385.1 | N/A |
| PDT000589542.1 | SAMN04505187   | SAMN04505187   | SRR3194926  | GCA 015601465.1 | N/A |

|                |              |              |             |                 |     |
|----------------|--------------|--------------|-------------|-----------------|-----|
| PDT000589545.1 | SAMN04505190 | SAMN04505190 | SRR3194929  | GCA 015600935.1 | N/A |
| PDT000589546.1 | SAMN04505191 | SAMN04505191 | SRR3194930  | GCA 015600885.1 | N/A |
| PDT000589548.1 | SAMN04505193 | SAMN04505193 | SRR3194932  | GCA 015601445.1 | N/A |
| PDT000589561.1 | SAMN04505206 | SAMN04505206 | SRR3194945  | GCA 015601105.1 | N/A |
| PDT000589568.1 | SAMN04505213 | SAMN04505213 | SRR3194952  | GCA 015600915.1 | N/A |
| PDT000596123.2 | SAMD00180470 | SAMD00180470 | DRR187559   | GCA 008619075.1 | N/A |
| PDT000596124.2 | SAMD00180471 | SAMD00180471 | DRR187560   | GCA 008619235.1 | N/A |
| PDT000596125.2 | SAMD00180472 | SAMD00180472 | DRR187561   | GCA 008619415.1 | N/A |
| PDT000596127.2 | SAMD00180474 | SAMD00180474 | DRR187563   | GCA 008619795.1 | N/A |
| PDT000596128.2 | SAMD00180475 | SAMD00180475 | DRR187564   | GCA 008619935.1 | N/A |
| PDT000596129.2 | SAMD00180476 | SAMD00180476 | DRR187565   | GCA 008620055.1 | N/A |
| PDT000596130.2 | SAMD00180477 | SAMD00180477 | DRR187566   | GCA 008620175.1 | N/A |
| PDT000596396.2 | SAMN11056375 | SAMN11056375 | SRR8984868  | GCA 008693765.1 | N/A |
| PDT000618818.1 | SAMN12768986 | SAMN12768986 | SRR10126881 | GCA 015600445.1 | N/A |
| PDT000618819.1 | SAMN12768985 | SAMN12768985 | SRR10126882 | GCA 015600475.1 | N/A |
| PDT000618820.1 | SAMN12768984 | SAMN12768984 | SRR10126883 | GCA 015600465.1 | N/A |
| PDT000618821.1 | SAMN12768983 | SAMN12768983 | SRR10126884 | GCA 015600365.1 | N/A |
| PDT000618822.1 | SAMN12768982 | SAMN12768982 | SRR10126885 | GCA 015600405.1 | N/A |
| PDT000618824.1 | SAMN12768980 | SAMN12768980 | SRR10126887 | GCA 015600325.1 | N/A |
| PDT000618855.1 | SAMN12768979 | SAMN12768979 | SRR10126918 | GCA 015600345.1 | N/A |
| PDT000618856.1 | SAMN12768978 | SAMN12768978 | SRR10126919 | GCA 015600285.1 | N/A |
| PDT000618858.1 | SAMN12768976 | SAMN12768976 | SRR10126921 | GCA 015600305.1 | N/A |
| PDT000618859.1 | SAMN12768975 | SAMN12768975 | SRR10126922 | GCA 015600265.1 | N/A |
| PDT000618860.1 | SAMN12768974 | SAMN12768974 | SRR10126923 | GCA 015600205.1 | N/A |
| PDT000618861.1 | SAMN12768973 | SAMN12768973 | SRR10126924 | GCA 015600245.1 | N/A |
| PDT000618862.1 | SAMN12768972 | SAMN12768972 | SRR10126925 | GCA 015600145.1 | N/A |
| PDT000618863.1 | SAMN12768971 | SAMN12768971 | SRR10126926 | GCA 015600005.1 | N/A |
| PDT000618866.1 | SAMN12768969 | SAMN12768969 | SRR10126929 | GCA 015600085.1 | N/A |
| PDT000618867.1 | SAMN12768968 | SAMN12768968 | SRR10126930 | GCA 015600165.1 | N/A |
| PDT000618868.1 | SAMN12768967 | SAMN12768967 | SRR10126931 | GCA 015600065.1 | N/A |
| PDT000618869.1 | SAMN12768966 | SAMN12768966 | SRR10126932 | GCA 015600045.1 | N/A |
| PDT000618870.1 | SAMN12768965 | SAMN12768965 | SRR10126933 | GCA 015600105.1 | N/A |
| PDT000618871.1 | SAMN12768964 | SAMN12768964 | SRR10126934 | GCA 015600225.1 | N/A |
| PDT000618872.1 | SAMN12768963 | SAMN12768963 | SRR10126935 | GCA 015600185.1 | N/A |
| PDT000618873.1 | SAMN12768962 | SAMN12768962 | SRR10126936 | GCA 015600025.1 | N/A |
| PDT000618874.1 | SAMN12768961 | SAMN12768961 | SRR10126937 | GCA 015599845.1 | N/A |
| PDT000618875.1 | SAMN12768960 | SAMN12768960 | SRR10126938 | GCA 015599945.1 | N/A |
| PDT000618877.1 | SAMN12768959 | SAMN12768959 | SRR10126940 | GCA 015599985.1 | N/A |
| PDT000618878.1 | SAMN12768958 | SAMN12768958 | SRR10126941 | GCA 015599965.1 | N/A |
| PDT000618879.1 | SAMN12768957 | SAMN12768957 | SRR10126942 | GCA 015599925.1 | N/A |
| PDT000618909.1 | SAMN12768955 | SAMN12768955 | SRR10126972 | GCA 015599885.1 | N/A |
| PDT000618910.1 | SAMN12768954 | SAMN12768954 | SRR10126973 | GCA 015599825.1 | N/A |
| PDT000618911.1 | SAMN12768953 | SAMN12768953 | SRR10126974 | GCA 015599855.1 | N/A |
| PDT000618912.1 | SAMN12768952 | SAMN12768952 | SRR10126975 | GCA 015599805.1 | N/A |
| PDT000618913.1 | SAMN12768951 | SAMN12768951 | SRR10126976 | GCA 015599765.1 | N/A |
| PDT000618914.1 | SAMN12768950 | SAMN12768950 | SRR10126977 | GCA 015599725.1 | N/A |
| PDT000618916.1 | SAMN12768949 | SAMN12768949 | SRR10126979 | GCA 015599705.1 | N/A |
| PDT000618917.1 | SAMN12768948 | SAMN12768948 | SRR10126980 | GCA 015599745.1 | N/A |
| PDT000618918.1 | SAMN12768947 | SAMN12768947 | SRR10126981 | GCA 015599785.1 | N/A |
| PDT000618919.1 | SAMN12768946 | SAMN12768946 | SRR10126982 | GCA 015599505.1 | N/A |
| PDT000618921.1 | SAMN12768944 | SAMN12768944 | SRR10126984 | GCA 015599605.1 | N/A |
| PDT000618922.1 | SAMN12768943 | SAMN12768943 | SRR10126985 | GCA 015599665.1 | N/A |
| PDT000618923.1 | SAMN12768942 | SAMN12768942 | SRR10126986 | GCA 015599625.1 | N/A |
| PDT000618924.1 | SAMN12768941 | SAMN12768941 | SRR10126987 | GCA 015596785.1 | N/A |
| PDT000618925.1 | SAMN12768940 | SAMN12768940 | SRR10126988 | GCA 015596725.1 | N/A |
| PDT000618927.1 | SAMN12768939 | SAMN12768939 | SRR10126990 | GCA 015596665.1 | N/A |
| PDT000618928.1 | SAMN12768938 | SAMN12768938 | SRR10126991 | GCA 015596705.1 | N/A |
| PDT000618929.1 | SAMN12768937 | SAMN12768937 | SRR10126992 | GCA 015596765.1 | N/A |
| PDT000618930.1 | SAMN12768936 | SAMN12768936 | SRR10126993 | GCA 015596645.1 | N/A |
| PDT000618931.1 | SAMN12768935 | SAMN12768935 | SRR10126994 | GCA 015596675.1 | N/A |
| PDT000618932.1 | SAMN12768934 | SAMN12768934 | SRR10126995 | GCA 015596605.1 | N/A |
| PDT000618933.1 | SAMN12768933 | SAMN12768933 | SRR10126996 | GCA 015596585.1 | N/A |
| PDT000618934.1 | SAMN12768932 | SAMN12768932 | SRR10126997 | GCA 015596625.1 | N/A |
| PDT000618935.1 | SAMN12768931 | SAMN12768931 | SRR10126998 | GCA 015596545.1 | N/A |
| PDT000618936.1 | SAMN12768930 | SAMN12768930 | SRR10126999 | GCA 015596565.1 | N/A |
| PDT000618994.1 | SAMN12768929 | SAMN12768929 | SRR10127057 | GCA 015596505.1 | N/A |
| PDT000618996.1 | SAMN12768928 | SAMN12768928 | SRR10127059 | GCA 015596525.1 | N/A |
| PDT000618997.1 | SAMN12768927 | SAMN12768927 | SRR10127060 | GCA 015596485.1 | N/A |

|                |              |              |             |                 |     |
|----------------|--------------|--------------|-------------|-----------------|-----|
| PDT000618998.1 | SAMN12768926 | SAMN12768926 | SRR10127061 | GCA 015596445.1 | N/A |
| PDT000618999.1 | SAMN12768925 | SAMN12768925 | SRR10127062 | GCA 015596465.1 | N/A |
| PDT000619000.1 | SAMN12768924 | SAMN12768924 | SRR10127063 | GCA 015595965.1 | N/A |
| PDT000619001.1 | SAMN12768923 | SAMN12768923 | SRR10127064 | GCA 015595905.1 | N/A |
| PDT000619002.1 | SAMN12768922 | SAMN12768922 | SRR10127065 | GCA 015595945.1 | N/A |
| PDT000619003.1 | SAMN12768921 | SAMN12768921 | SRR10127066 | GCA 015595885.1 | N/A |
| PDT000619004.1 | SAMN12768920 | SAMN12768920 | SRR10127067 | GCA 015598005.1 | N/A |
| PDT000619006.1 | SAMN12768919 | SAMN12768919 | SRR10127069 | GCA 015596125.1 | N/A |
| PDT000619007.1 | SAMN12768918 | SAMN12768918 | SRR10127070 | GCA 015596065.1 | N/A |
| PDT000619008.1 | SAMN12768917 | SAMN12768917 | SRR10127071 | GCA 015596005.1 | N/A |
| PDT000619009.1 | SAMN12768916 | SAMN12768916 | SRR10127072 | GCA 015596025.1 | N/A |
| PDT000619011.1 | SAMN12768914 | SAMN12768914 | SRR10127074 | GCA 015595985.1 | N/A |
| PDT000619012.1 | SAMN12768913 | SAMN12768913 | SRR10127075 | GCA 015596405.1 | N/A |
| PDT000630356.1 | SAMN13323580 | SAMN13323580 | SRR10484628 | GCA 015595825.1 | N/A |
| PDT000641062.2 | SAMN13381878 | SAMN13381878 | SRR10524178 | GCA 009729825.1 | N/A |
| PDT000641182.2 | SAMD00071152 | SAMD00071152 | DRR083589   | GCA 009731595.1 | N/A |
| PDT000654730.2 | SAMN13517281 | SAMN13517281 | SRR11558430 | GCA 009763195.1 | N/A |
| PDT000655874.1 | SAMN13687296 | SAMN13687296 | SRR10842786 | GCA 015594385.1 | N/A |
| PDT000655908.1 | SAMN13687304 | SAMN13687304 | SRR10842778 | GCA 015594265.1 | N/A |
| PDT000655918.1 | SAMN13687294 | SAMN13687294 | SRR10842789 | GCA 015593645.1 | N/A |
| PDT000655922.1 | SAMN13687290 | SAMN13687290 | SRR10842793 | GCA 015593945.1 | N/A |
| PDT000655928.1 | SAMN13687267 | SAMN13687267 | SRR10842799 | GCA 015593845.1 | N/A |
| PDT000665454.2 | SAMEA6126449 | SAMEA6126449 | ERR3624121  | GCA 902636275.1 | N/A |
| PDT000669993.2 | SAMEA958834  | SAMEA958834  | ERR033078   | GCA 902713855.1 | N/A |
| PDT000669996.2 | SAMEA958840  | SAMEA958840  | ERR033076   | GCA 902713885.1 | N/A |
| PDT000669999.2 | SAMEA958838  | SAMEA958838  | ERR033074   | GCA 902713915.1 | N/A |
| PDT000670005.2 | SAMEA958847  | SAMEA958847  | ERR023883   | GCA 902713995.1 | N/A |
| PDT000670006.2 | SAMEA958829  | SAMEA958829  | ERR023877   | GCA 902714105.1 | N/A |
| PDT000670008.2 | SAMEA958855  | SAMEA958855  | ERR023881   | GCA 902714095.1 | N/A |
| PDT000670012.2 | SAMEA958856  | SAMEA958856  | ERR023882   | GCA 902713965.1 | N/A |
| PDT000670019.2 | SAMEA958837  | SAMEA958837  | ERR033081   | GCA 902714085.1 | N/A |
| PDT000670020.2 | SAMEA958821  | SAMEA958821  | ERR023870   | GCA 902714055.1 | N/A |
| PDT000670022.2 | SAMEA958851  | SAMEA958851  | ERR023865   | GCA 902714145.1 | N/A |
| PDT000670023.2 | SAMEA958816  | SAMEA958816  | ERR023868   | GCA 902714135.1 | N/A |
| PDT000670024.2 | SAMEA958988  | SAMEA958988  | ERR033836   | GCA 902714225.1 | N/A |
| PDT000670026.2 | SAMEA958862  | SAMEA958862  | ERR023899   | GCA 902714255.1 | N/A |
| PDT000670027.2 | SAMEA958833  | SAMEA958833  | ERR023902   | GCA 902714335.1 | N/A |
| PDT000670028.2 | SAMEA958989  | SAMEA958989  | ERR033834   | GCA 902714325.1 | N/A |
| PDT000670029.2 | SAMEA958872  | SAMEA958872  | ERR023906   | GCA 902714305.1 | N/A |
| PDT000670030.2 | SAMEA958822  | SAMEA958822  | ERR023888   | GCA 902714235.1 | N/A |
| PDT000670031.2 | SAMEA958962  | SAMEA958962  | ERR033833   | GCA 902714245.1 | N/A |
| PDT000670032.2 | SAMEA958896  | SAMEA958896  | ERR023909   | GCA 902714165.1 | N/A |
| PDT000670033.2 | SAMEA958987  | SAMEA958987  | ERR033835   | GCA 902714295.1 | N/A |
| PDT000670034.2 | SAMEA958898  | SAMEA958898  | ERR023908   | GCA 902714215.1 | N/A |
| PDT000670035.2 | SAMEA958860  | SAMEA958860  | ERR023904   | GCA 902714285.1 | N/A |
| PDT000670037.2 | SAMEA958900  | SAMEA958900  | ERR023907   | GCA 902714275.1 | N/A |
| PDT000670040.2 | SAMEA958894  | SAMEA958894  | ERR023910   | GCA 902714185.1 | N/A |
| PDT000670041.2 | SAMEA958904  | SAMEA958904  | ERR023901   | GCA 902714345.1 | N/A |
| PDT000670042.2 | SAMEA958906  | SAMEA958906  | ERR023900   | GCA 902714355.1 | N/A |
| PDT000670043.2 | SAMEA958991  | SAMEA958991  | ERR033830   | GCA 902714375.1 | N/A |
| PDT000670044.2 | SAMEA958954  | SAMEA958954  | ERR035964   | GCA 902714395.1 | N/A |
| PDT000670046.2 | SAMEA958952  | SAMEA958952  | ERR035977   | GCA 902714365.1 | N/A |
| PDT000670047.2 | SAMEA958953  | SAMEA958953  | ERR035963   | GCA 902714405.1 | N/A |
| PDT000670048.2 | SAMEA958960  | SAMEA958960  | ERR035979   | GCA 902714385.1 | N/A |
| PDT000670049.2 | SAMEA958774  | SAMEA958774  | ERR033837   | GCA 902714445.1 | N/A |
| PDT000670050.2 | SAMEA958935  | SAMEA958935  | ERR035981   | GCA 902714525.1 | N/A |
| PDT000670051.2 | SAMEA958937  | SAMEA958937  | ERR035983   | GCA 902714455.1 | N/A |
| PDT000670052.2 | SAMEA958936  | SAMEA958936  | ERR035980   | GCA 902714505.1 | N/A |
| PDT000670056.2 | SAMEA958938  | SAMEA958938  | ERR035982   | GCA 902714485.1 | N/A |
| PDT000670057.2 | SAMEA958956  | SAMEA958956  | ERR035962   | GCA 902714475.1 | N/A |
| PDT000670058.2 | SAMEA958959  | SAMEA958959  | ERR035978   | GCA 902714515.1 | N/A |
| PDT000670060.2 | SAMEA958951  | SAMEA958951  | ERR035974   | GCA 902714495.1 | N/A |
| PDT000670061.2 | SAMEA958929  | SAMEA958929  | ERR035975   | GCA 902714535.1 | N/A |
| PDT000670062.2 | SAMEA958931  | SAMEA958931  | ERR035984   | GCA 902714545.1 | N/A |
| PDT000670063.2 | SAMEA958767  | SAMEA958767  | ERR035996   | GCA 902714585.1 | N/A |
| PDT000670064.2 | SAMEA958766  | SAMEA958766  | ERR035995   | GCA 902714555.1 | N/A |
| PDT000670065.2 | SAMEA958934  | SAMEA958934  | ERR035976   | GCA 902714575.1 | N/A |
| PDT000670066.2 | SAMEA958770  | SAMEA958770  | ERR035991   | GCA 902714595.1 | N/A |

|                |              |              |            |                 |     |
|----------------|--------------|--------------|------------|-----------------|-----|
| PDT000670067.2 | SAMEA958771  | SAMEA958771  | ERR035992  | GCA 902714565.1 | N/A |
| PDT000670068.2 | SAMEA958765  | SAMEA958765  | ERR036001  | GCA 902714655.1 | N/A |
| PDT000670069.2 | SAMEA958933  | SAMEA958933  | ERR035986  | GCA 902714605.1 | N/A |
| PDT000670070.2 | SAMEA958773  | SAMEA958773  | ERR035994  | GCA 902714635.1 | N/A |
| PDT000670071.2 | SAMEA958939  | SAMEA958939  | ERR035990  | GCA 902714625.1 | N/A |
| PDT000670072.2 | SAMEA958940  | SAMEA958940  | ERR035989  | GCA 902714615.1 | N/A |
| PDT000670073.2 | SAMEA958772  | SAMEA958772  | ERR035993  | GCA 902714645.1 | N/A |
| PDT000670074.2 | SAMEA958800  | SAMEA958800  | ERR036020  | GCA 902714695.1 | N/A |
| PDT000670075.2 | SAMEA958803  | SAMEA958803  | ERR036011  | GCA 902714785.1 | N/A |
| PDT000670076.2 | SAMEA958787  | SAMEA958787  | ERR036026  | GCA 902714845.1 | N/A |
| PDT000670077.2 | SAMEA958790  | SAMEA958790  | ERR036031  | GCA 902714815.1 | N/A |
| PDT000670078.2 | SAMEA958802  | SAMEA958802  | ERR036018  | GCA 902714685.1 | N/A |
| PDT000670079.2 | SAMEA958784  | SAMEA958784  | ERR036025  | GCA 902714835.1 | N/A |
| PDT000670080.2 | SAMEA958801  | SAMEA958801  | ERR036017  | GCA 902714735.1 | N/A |
| PDT000670081.2 | SAMEA958799  | SAMEA958799  | ERR036019  | GCA 902714795.1 | N/A |
| PDT000670082.2 | SAMEA958798  | SAMEA958798  | ERR036014  | GCA 902714705.1 | N/A |
| PDT000670083.2 | SAMEA958915  | SAMEA958915  | ERR036024  | GCA 902714665.1 | N/A |
| PDT000670084.2 | SAMEA958793  | SAMEA958793  | ERR036032  | GCA 902714745.1 | N/A |
| PDT000670085.2 | SAMEA958796  | SAMEA958796  | ERR036016  | GCA 902714825.1 | N/A |
| PDT000670086.2 | SAMEA958788  | SAMEA958788  | ERR036029  | GCA 902714805.1 | N/A |
| PDT000670087.2 | SAMEA958785  | SAMEA958785  | ERR036022  | GCA 902714765.1 | N/A |
| PDT000670088.2 | SAMEA958792  | SAMEA958792  | ERR036023  | GCA 902714675.1 | N/A |
| PDT000670089.2 | SAMEA958791  | SAMEA958791  | ERR036030  | GCA 902714755.1 | N/A |
| PDT000670090.2 | SAMEA958795  | SAMEA958795  | ERR036015  | GCA 902714725.1 | N/A |
| PDT000670091.2 | SAMEA958789  | SAMEA958789  | ERR036028  | GCA 902714715.1 | N/A |
| PDT000670092.2 | SAMEA958786  | SAMEA958786  | ERR036027  | GCA 902714775.1 | N/A |
| PDT000670093.2 | SAMEA958804  | SAMEA958804  | ERR036012  | GCA 902714855.1 | N/A |
| PDT000670094.2 | SAMEA958913  | SAMEA958913  | ERR036034  | GCA 902714875.1 | N/A |
| PDT000670095.2 | SAMEA958845  | SAMEA958845  | ERR036056  | GCA 902714905.1 | N/A |
| PDT000670096.2 | SAMEA958949  | SAMEA958949  | ERR036054  | GCA 902714895.1 | N/A |
| PDT000670097.2 | SAMEA958919  | SAMEA958919  | ERR036041  | GCA 902715005.1 | N/A |
| PDT000670098.2 | SAMEA958944  | SAMEA958944  | ERR036053  | GCA 902714955.1 | N/A |
| PDT000670099.2 | SAMEA958910  | SAMEA958910  | ERR036038  | GCA 902714995.1 | N/A |
| PDT000670100.2 | SAMEA958946  | SAMEA958946  | ERR036036  | GCA 902714865.1 | N/A |
| PDT000670101.2 | SAMEA958925  | SAMEA958925  | ERR036044  | GCA 902714935.1 | N/A |
| PDT000670102.2 | SAMEA958942  | SAMEA958942  | ERR036051  | GCA 902714885.1 | N/A |
| PDT000670103.2 | SAMEA958950  | SAMEA958950  | ERR036055  | GCA 902714945.1 | N/A |
| PDT000670104.2 | SAMEA958927  | SAMEA958927  | ERR036043  | GCA 902715045.1 | N/A |
| PDT000670105.2 | SAMEA958912  | SAMEA958912  | ERR036037  | GCA 902714985.1 | N/A |
| PDT000670106.2 | SAMEA958948  | SAMEA958948  | ERR036049  | GCA 902715035.1 | N/A |
| PDT000670107.2 | SAMEA958945  | SAMEA958945  | ERR036035  | GCA 902715025.1 | N/A |
| PDT000670108.2 | SAMEA958947  | SAMEA958947  | ERR036046  | GCA 902714925.1 | N/A |
| PDT000670109.2 | SAMEA958941  | SAMEA958941  | ERR036050  | GCA 902714915.1 | N/A |
| PDT000670110.2 | SAMEA958922  | SAMEA958922  | ERR036040  | GCA 902714975.1 | N/A |
| PDT000670111.2 | SAMEA958943  | SAMEA958943  | ERR036052  | GCA 902715015.1 | N/A |
| PDT000670112.2 | SAMEA958917  | SAMEA958917  | ERR036042  | GCA 902714965.1 | N/A |
| PDT000670113.2 | SAMEA958924  | SAMEA958924  | ERR036039  | GCA 902715055.1 | N/A |
| PDT000670114.2 | SAMEA958844  | SAMEA958844  | ERR036047  | GCA 902715075.1 | N/A |
| PDT000670115.2 | SAMEA1029560 | SAMEA1029560 | ERR064942  | GCA 902715085.1 | N/A |
| PDT000670121.2 | SAMEA1029529 | SAMEA1029529 | ERR064939  | GCA 902715115.1 | N/A |
| PDT000670141.2 | SAMEA1029563 | SAMEA1029563 | ERR064953  | GCA 902715265.1 | N/A |
| PDT000670147.2 | SAMEA1029547 | SAMEA1029547 | ERR064952  | GCA 902715425.1 | N/A |
| PDT000670148.2 | SAMEA1029556 | SAMEA1029556 | ERR064946  | GCA 902715335.1 | N/A |
| PDT000670154.2 | SAMEA1029541 | SAMEA1029541 | ERR064943  | GCA 902715455.1 | N/A |
| PDT000670272.2 | SAMEA958764  | SAMEA958764  | ERR035998  | GCA 902716685.1 | N/A |
| PDT000670274.2 | SAMEA958984  | SAMEA958984  | ERR036006  | GCA 902716675.1 | N/A |
| PDT000670275.2 | SAMEA958977  | SAMEA958977  | ERR036005  | GCA 902716695.1 | N/A |
| PDT000670276.2 | SAMEA958769  | SAMEA958769  | ERR035988  | GCA 902716635.1 | N/A |
| PDT000670277.2 | SAMEA958981  | SAMEA958981  | ERR035999  | GCA 902716705.1 | N/A |
| PDT000670278.2 | SAMEA958983  | SAMEA958983  | ERR036007  | GCA 902716755.1 | N/A |
| PDT000670279.2 | SAMEA958768  | SAMEA958768  | ERR035987  | GCA 902716625.1 | N/A |
| PDT000670280.2 | SAMEA958975  | SAMEA958975  | ERR036010  | GCA 902716735.1 | N/A |
| PDT000670281.2 | SAMEA958797  | SAMEA958797  | ERR036013  | GCA 902716655.1 | N/A |
| PDT000670282.2 | SAMEA958976  | SAMEA958976  | ERR036000  | GCA 902716615.1 | N/A |
| PDT000670285.2 | SAMEA958982  | SAMEA958982  | ERR036008  | GCA 902716665.1 | N/A |
| PDT000670286.2 | SAMEA958979  | SAMEA958979  | ERR036003  | GCA 902716765.1 | N/A |
| PDT000670288.2 | SAMEA958978  | SAMEA958978  | ERR036004  | GCA 902716795.1 | N/A |
| PDT000670558.2 | SAMN11175638 | SAMN11175638 | SRR8776856 | GCA 009911815.1 | N/A |

|                |              |              |             |                 |     |
|----------------|--------------|--------------|-------------|-----------------|-----|
| PDT000670559.2 | SAMN11175644 | SAMN11175644 | SRR8776862  | GCA 009911835.1 | N/A |
| PDT000670560.2 | SAMN11175634 | SAMN11175634 | SRR8776847  | GCA 009911855.1 | N/A |
| PDT000670561.2 | SAMN11175621 | SAMN11175621 | SRR8776837  | GCA 009911895.1 | N/A |
| PDT000670562.2 | SAMN11175633 | SAMN11175633 | SRR8776848  | GCA 009911965.1 | N/A |
| PDT000670563.2 | SAMN11175637 | SAMN11175637 | SRR8776854  | GCA 009912015.1 | N/A |
| PDT000670564.2 | SAMN11175641 | SAMN11175641 | SRR8776859  | GCA 009912035.1 | N/A |
| PDT000670565.2 | SAMN11175643 | SAMN11175643 | SRR8776861  | GCA 009912055.1 | N/A |
| PDT000670566.2 | SAMN11175645 | SAMN11175645 | SRR8776863  | GCA 009912075.1 | N/A |
| PDT000670567.2 | SAMN11175628 | SAMN11175628 | SRR8776853  | GCA 009912095.1 | N/A |
| PDT000670568.2 | SAMN11175616 | SAMN11175616 | SRR8776835  | GCA 009912115.1 | N/A |
| PDT000670569.2 | SAMN11175640 | SAMN11175640 | SRR8776858  | GCA 009912155.1 | N/A |
| PDT000670570.2 | SAMN11175630 | SAMN11175630 | SRR8776851  | GCA 009912195.1 | N/A |
| PDT000670572.2 | SAMN11175620 | SAMN11175620 | SRR8776836  | GCA 009912255.1 | N/A |
| PDT000670573.2 | SAMN11175639 | SAMN11175639 | SRR8776857  | GCA 009912295.1 | N/A |
| PDT000670574.2 | SAMN11175631 | SAMN11175631 | SRR8776850  | GCA 009912335.1 | N/A |
| PDT000670575.2 | SAMN11175629 | SAMN11175629 | SRR8776852  | GCA 009912355.1 | N/A |
| PDT000670576.2 | SAMN11175624 | SAMN11175624 | SRR8776840  | GCA 009912375.1 | N/A |
| PDT000670577.2 | SAMN11175636 | SAMN11175636 | SRR8776855  | GCA 009912415.1 | N/A |
| PDT000670578.2 | SAMN11175635 | SAMN11175635 | SRR8776846  | GCA 009912435.1 | N/A |
| PDT000670579.2 | SAMN11175625 | SAMN11175625 | SRR8776841  | GCA 009912455.1 | N/A |
| PDT000670580.2 | SAMN11175632 | SAMN11175632 | SRR8776849  | GCA 009912475.1 | N/A |
| PDT000670581.2 | SAMN11175627 | SAMN11175627 | SRR8776845  | GCA 009912495.1 | N/A |
| PDT000670582.2 | SAMN11175626 | SAMN11175626 | SRR8776844  | GCA 009912535.1 | N/A |
| PDT000670583.2 | SAMN11175619 | SAMN11175619 | SRR8776839  | GCA 009912555.1 | N/A |
| PDT000670584.2 | SAMN11175623 | SAMN11175623 | SRR8776843  | GCA 009912595.1 | N/A |
| PDT000670585.2 | SAMN11175618 | SAMN11175618 | SRR8776838  | GCA 009912615.1 | N/A |
| PDT000670586.2 | SAMN11175607 | SAMN11175607 | SRR8776815  | GCA 009912635.1 | N/A |
| PDT000670587.2 | SAMN11175622 | SAMN11175622 | SRR8776842  | GCA 009912655.1 | N/A |
| PDT000670588.2 | SAMN11175615 | SAMN11175615 | SRR8776832  | GCA 009912675.1 | N/A |
| PDT000670589.2 | SAMN11175614 | SAMN11175614 | SRR8776833  | GCA 009912695.1 | N/A |
| PDT000670590.2 | SAMN11175617 | SAMN11175617 | SRR8776834  | GCA 009912715.1 | N/A |
| PDT000670591.2 | SAMN11175613 | SAMN11175613 | SRR8776830  | GCA 009912735.1 | N/A |
| PDT000670592.2 | SAMN11175608 | SAMN11175608 | SRR8776827  | GCA 009912755.1 | N/A |
| PDT000670593.2 | SAMN11175612 | SAMN11175612 | SRR8776831  | GCA 009912775.1 | N/A |
| PDT000670594.2 | SAMN11175598 | SAMN11175598 | SRR8776810  | GCA 009912795.1 | N/A |
| PDT000670595.2 | SAMN11175603 | SAMN11175603 | SRR8776807  | GCA 009912815.1 | N/A |
| PDT000670596.2 | SAMN11175606 | SAMN11175606 | SRR8776814  | GCA 009912835.1 | N/A |
| PDT000670597.2 | SAMN11175611 | SAMN11175611 | SRR8776828  | GCA 009912855.1 | N/A |
| PDT000670598.2 | SAMN11175610 | SAMN11175610 | SRR8776829  | GCA 009912875.1 | N/A |
| PDT000670599.2 | SAMN11175594 | SAMN11175594 | SRR8776803  | GCA 009912895.1 | N/A |
| PDT000670600.2 | SAMN11175604 | SAMN11175604 | SRR8776808  | GCA 009912915.1 | N/A |
| PDT000670601.2 | SAMN11175609 | SAMN11175609 | SRR8776826  | GCA 009912935.1 | N/A |
| PDT000670602.2 | SAMN11175605 | SAMN11175605 | SRR8776809  | GCA 009912955.1 | N/A |
| PDT000670603.2 | SAMN11175587 | SAMN11175587 | SRR8776796  | GCA 009912975.1 | N/A |
| PDT000670604.2 | SAMN11175588 | SAMN11175588 | SRR8776797  | GCA 009912995.1 | N/A |
| PDT000670605.2 | SAMN11175589 | SAMN11175589 | SRR8776798  | GCA 009913015.1 | N/A |
| PDT000670606.2 | SAMN11175599 | SAMN11175599 | SRR8776811  | GCA 009913035.1 | N/A |
| PDT000670607.2 | SAMN11175600 | SAMN11175600 | SRR8776812  | GCA 009913055.1 | N/A |
| PDT000670608.2 | SAMN11175601 | SAMN11175601 | SRR8776813  | GCA 009913075.1 | N/A |
| PDT000670609.2 | SAMN11175593 | SAMN11175593 | SRR8776802  | GCA 009913095.1 | N/A |
| PDT000670610.2 | SAMN11175590 | SAMN11175590 | SRR8776799  | GCA 009913115.1 | N/A |
| PDT000670611.2 | SAMN11175596 | SAMN11175596 | SRR8776805  | GCA 009913135.1 | N/A |
| PDT000670612.2 | SAMN11175592 | SAMN11175592 | SRR8776801  | GCA 009913155.1 | N/A |
| PDT000670613.2 | SAMN11175591 | SAMN11175591 | SRR8776800  | GCA 009913175.1 | N/A |
| PDT000670614.2 | SAMN11175595 | SAMN11175595 | SRR8776804  | GCA 009913195.1 | N/A |
| PDT000670615.2 | SAMN11175602 | SAMN11175602 | SRR8776806  | GCA 009913215.1 | N/A |
| PDT000673428.1 | SAMN11420025 | SAMN11420025 | SRR8980905  | GCA 015593745.1 | N/A |
| PDT000673591.1 | SAMN11420042 | SAMN11420042 | SRR8902828  | GCA 015593805.1 | N/A |
| PDT000675870.2 | SAMN11175642 | SAMN11175642 | SRR8776860  | GCA 009937785.1 | N/A |
| PDT000681755.2 | SAMEA2080326 | SAMEA2080326 | ERR517341   | GCA 902722265.1 | N/A |
| PDT000686247.2 | SAMN13948100 | SAMN13948100 | SRR14923799 | GCA 010363645.1 | N/A |
| PDT000686248.2 | SAMN13948094 | SAMN13948094 | SRR14923792 | GCA 010363625.1 | N/A |
| PDT000686249.2 | SAMN13948089 | SAMN13948089 | SRR14923787 | GCA 010363635.1 | N/A |
| PDT000686250.2 | SAMN13948092 | SAMN13948092 | SRR14923790 | GCA 010363655.1 | N/A |
| PDT000686251.2 | SAMN13948105 | SAMN13948105 | SRR14923802 | GCA 010363705.1 | N/A |
| PDT000686253.2 | SAMN13948050 | SAMN13948050 | SRR14923811 | GCA 010363725.1 | N/A |
| PDT000686254.2 | SAMN13948093 | SAMN13948093 | SRR14923791 | GCA 010363735.1 | N/A |
| PDT000686255.2 | SAMN13948087 | SAMN13948087 | SRR14923855 | GCA 010363755.1 | N/A |



|                |              |              |             |                 |     |
|----------------|--------------|--------------|-------------|-----------------|-----|
| PDT000686256.2 | SAMN13948048 | SAMN13948048 | SRR14923809 | GCA 010363805.1 | N/A |
| PDT000686257.2 | SAMN13948044 | SAMN13948044 | SRR14923847 | GCA 010363825.1 | N/A |
| PDT000686258.2 | SAMN13948086 | SAMN13948086 | SRR14923856 | GCA 010363815.1 | N/A |
| PDT000686259.2 | SAMN13948085 | SAMN13948085 | SRR14923846 | GCA 010363835.1 | N/A |
| PDT000686260.2 | SAMN13948088 | SAMN13948088 | SRR14923786 | GCA 010363845.1 | N/A |
| PDT000686261.2 | SAMN13948084 | SAMN13948084 | SRR14923845 | GCA 010363915.1 | N/A |
| PDT000686262.2 | SAMN13948081 | SAMN13948081 | SRR14923842 | GCA 010363905.1 | N/A |
| PDT000686263.2 | SAMN13948051 | SAMN13948051 | SRR14923812 | GCA 010363925.1 | N/A |
| PDT000686264.2 | SAMN13948047 | SAMN13948047 | SRR14923808 | GCA 010363935.1 | N/A |
| PDT000686265.2 | SAMN13948083 | SAMN13948083 | SRR14923844 | GCA 010363945.1 | N/A |
| PDT000686266.2 | SAMN13948038 | SAMN13948038 | SRR14923850 | GCA 010364005.1 | N/A |
| PDT000686267.2 | SAMN13948102 | SAMN13948102 | SRR14923854 | GCA 010364015.1 | N/A |
| PDT000686268.2 | SAMN13948106 | SAMN13948106 | SRR14923804 | GCA 010364035.1 | N/A |
| PDT000686269.2 | SAMN13948037 | SAMN13948037 | SRR14923806 | GCA 010364065.1 | N/A |
| PDT000686270.2 | SAMN13948090 | SAMN13948090 | SRR14923788 | GCA 010364075.1 | N/A |
| PDT000686271.2 | SAMN13948107 | SAMN13948107 | SRR14923805 | GCA 010364105.1 | N/A |
| PDT000686272.2 | SAMN13948101 | SAMN13948101 | SRR14923800 | GCA 010364125.1 | N/A |
| PDT000686273.2 | SAMN13948091 | SAMN13948091 | SRR14923789 | GCA 010364145.1 | N/A |
| PDT000686274.2 | SAMN13948097 | SAMN13948097 | SRR14923796 | GCA 010364165.1 | N/A |
| PDT000686275.2 | SAMN13948103 | SAMN13948103 | SRR14923853 | GCA 010364195.1 | N/A |
| PDT000686276.2 | SAMN13948104 | SAMN13948104 | SRR14923801 | GCA 010364185.1 | N/A |
| PDT000686277.2 | SAMN13948099 | SAMN13948099 | SRR14923798 | GCA 010364225.1 | N/A |
| PDT000686278.2 | SAMN13948098 | SAMN13948098 | SRR14923797 | GCA 010364235.1 | N/A |
| PDT000686279.2 | SAMN13948052 | SAMN13948052 | SRR14923813 | GCA 010364265.1 | N/A |
| PDT000686280.2 | SAMN13948049 | SAMN13948049 | SRR14923810 | GCA 010364285.1 | N/A |
| PDT000686281.2 | SAMN13948046 | SAMN13948046 | SRR14923807 | GCA 010364295.1 | N/A |
| PDT000686282.2 | SAMN13948096 | SAMN13948096 | SRR14923795 | GCA 010364325.1 | N/A |
| PDT000686283.2 | SAMN13948095 | SAMN13948095 | SRR14923793 | GCA 010364345.1 | N/A |
| PDT000686284.2 | SAMN13948065 | SAMN13948065 | SRR14923824 | GCA 010364355.1 | N/A |
| PDT000686285.2 | SAMN13948064 | SAMN13948064 | SRR14923823 | GCA 010364385.1 | N/A |
| PDT000686286.2 | SAMN13948063 | SAMN13948063 | SRR14923822 | GCA 010364415.1 | N/A |
| PDT000686287.2 | SAMN13948062 | SAMN13948062 | SRR14923821 | GCA 010364405.1 | N/A |
| PDT000686288.2 | SAMN13948058 | SAMN13948058 | SRR14923817 | GCA 010364445.1 | N/A |
| PDT000686289.2 | SAMN13948060 | SAMN13948060 | SRR14923819 | GCA 010364455.1 | N/A |
| PDT000686290.2 | SAMN13948061 | SAMN13948061 | SRR14923820 | GCA 010364465.1 | N/A |
| PDT000686291.2 | SAMN13948055 | SAMN13948055 | SRR14923816 | GCA 010364505.1 | N/A |
| PDT000686292.2 | SAMN13948059 | SAMN13948059 | SRR14923818 | GCA 010364525.1 | N/A |
| PDT000686293.2 | SAMN13948043 | SAMN13948043 | SRR14923803 | GCA 010364545.1 | N/A |
| PDT000686294.2 | SAMN13948057 | SAMN13948057 | SRR14923852 | GCA 010364555.1 | N/A |
| PDT000686295.2 | SAMN13948056 | SAMN13948056 | SRR14923851 | GCA 010364565.1 | N/A |
| PDT000686296.2 | SAMN13948053 | SAMN13948053 | SRR14923814 | GCA 010364605.1 | N/A |
| PDT000686297.2 | SAMN13948054 | SAMN13948054 | SRR14923815 | GCA 010364615.1 | N/A |
| PDT000686298.2 | SAMN13948042 | SAMN13948042 | SRR14923794 | GCA 010364645.1 | N/A |
| PDT000686299.2 | SAMN13948040 | SAMN13948040 | SRR14923836 | GCA 010364655.1 | N/A |
| PDT000686300.2 | SAMN13948041 | SAMN13948041 | SRR14923857 | GCA 010364665.1 | N/A |
| PDT000686301.2 | SAMN13948036 | SAMN13948036 | SRR14923849 | GCA 010364705.1 | N/A |
| PDT000686302.2 | SAMN13948039 | SAMN13948039 | SRR14923825 | GCA 010364725.1 | N/A |
| PDT000686303.2 | SAMN13948079 | SAMN13948079 | SRR14923840 | GCA 010364745.1 | N/A |
| PDT000686304.2 | SAMN13948080 | SAMN13948080 | SRR14923841 | GCA 010364755.1 | N/A |
| PDT000686305.2 | SAMN13948082 | SAMN13948082 | SRR14923843 | GCA 010364775.1 | N/A |
| PDT000686306.2 | SAMN13948078 | SAMN13948078 | SRR14923839 | GCA 010364805.1 | N/A |
| PDT000686307.2 | SAMN13948045 | SAMN13948045 | SRR14923848 | GCA 010364825.1 | N/A |
| PDT000686308.2 | SAMN13948072 | SAMN13948072 | SRR14923832 | GCA 010364845.1 | N/A |
| PDT000686309.2 | SAMN13948076 | SAMN13948076 | SRR14923837 | GCA 010364865.1 | N/A |
| PDT000686310.2 | SAMN13948073 | SAMN13948073 | SRR14923833 | GCA 010364875.1 | N/A |
| PDT000686311.2 | SAMN13948075 | SAMN13948075 | SRR14923835 | GCA 010364895.1 | N/A |
| PDT000686312.2 | SAMN13948069 | SAMN13948069 | SRR14923829 | GCA 010364925.1 | N/A |
| PDT000686313.2 | SAMN13948077 | SAMN13948077 | SRR14923838 | GCA 010364935.1 | N/A |
| PDT000686314.2 | SAMN13948066 | SAMN13948066 | SRR14923826 | GCA 010364965.1 | N/A |
| PDT000686315.2 | SAMN13948074 | SAMN13948074 | SRR14923834 | GCA 010364985.1 | N/A |
| PDT000686316.2 | SAMN13948068 | SAMN13948068 | SRR14923828 | GCA 010364995.1 | N/A |
| PDT000686317.2 | SAMN13948070 | SAMN13948070 | SRR14923830 | GCA 010365025.1 | N/A |
| PDT000686318.2 | SAMN13948071 | SAMN13948071 | SRR14923831 | GCA 010365035.1 | N/A |
| PDT000686319.2 | SAMN13948067 | SAMN13948067 | SRR14923827 | GCA 010365075.1 | N/A |
| PDT000686729.2 | SAMN12251193 | SAMN12251193 | SRR10905465 | GCA 010599065.1 | N/A |
| PDT000686730.2 | SAMN12251194 | SAMN12251194 | SRR10905464 | GCA 010599085.1 | N/A |
| PDT000686731.2 | SAMN12251192 | SAMN12251192 | SRR10905466 | GCA 010599105.1 | N/A |
| PDT000686732.2 | SAMN12251197 | SAMN12251197 | SRR10905461 | GCA 010599125.1 | N/A |

|                |              |              |             |                 |     |
|----------------|--------------|--------------|-------------|-----------------|-----|
| PDT000686733.2 | SAMN12251196 | SAMN12251196 | SRR10905462 | GCA 010599145.1 | N/A |
| PDT000686734.2 | SAMN12251198 | SAMN12251198 | SRR10905460 | GCA 010599165.1 | N/A |
| PDT000686735.2 | SAMN12251189 | SAMN12251189 | SRR10905469 | GCA 010599195.1 | N/A |
| PDT000686736.2 | SAMN12251182 | SAMN12251182 | SRR10905477 | GCA 010599185.1 | N/A |
| PDT000686737.2 | SAMN12251187 | SAMN12251187 | SRR10905472 | GCA 010599225.1 | N/A |
| PDT000686738.2 | SAMN12251186 | SAMN12251186 | SRR10905473 | GCA 010599235.1 | N/A |
| PDT000686739.2 | SAMN12251179 | SAMN12251179 | SRR10905480 | GCA 010599265.1 | N/A |
| PDT000686740.2 | SAMN12251181 | SAMN12251181 | SRR10905478 | GCA 010599275.1 | N/A |
| PDT000686741.2 | SAMN12251177 | SAMN12251177 | SRR10905579 | GCA 010599305.1 | N/A |
| PDT000686742.2 | SAMN12251180 | SAMN12251180 | SRR10905479 | GCA 010599315.1 | N/A |
| PDT000686743.2 | SAMN12251176 | SAMN12251176 | SRR10905580 | GCA 010599345.1 | N/A |
| PDT000686744.2 | SAMN12251175 | SAMN12251175 | SRR10905581 | GCA 010599365.1 | N/A |
| PDT000686746.2 | SAMN12251171 | SAMN12251171 | SRR10905585 | GCA 010599395.1 | N/A |
| PDT000686747.2 | SAMN12251170 | SAMN12251170 | SRR10905586 | GCA 010599405.1 | N/A |
| PDT000686748.2 | SAMN12251169 | SAMN12251169 | SRR10905587 | GCA 010599445.1 | N/A |
| PDT000686749.2 | SAMN12251168 | SAMN12251168 | SRR10905589 | GCA 010599465.1 | N/A |
| PDT000686751.2 | SAMN12251164 | SAMN12251164 | SRR10905593 | GCA 010599495.1 | N/A |
| PDT000686752.2 | SAMN12251163 | SAMN12251163 | SRR10905594 | GCA 010599505.1 | N/A |
| PDT000686753.2 | SAMN12251162 | SAMN12251162 | SRR10905595 | GCA 010599525.1 | N/A |
| PDT000686755.2 | SAMN12251158 | SAMN12251158 | SRR10905601 | GCA 010599585.1 | N/A |
| PDT000686756.2 | SAMN12251159 | SAMN12251159 | SRR10905598 | GCA 010599615.1 | N/A |
| PDT000686758.2 | SAMN12251160 | SAMN12251160 | SRR10905597 | GCA 010599625.1 | N/A |
| PDT000686759.2 | SAMN12251156 | SAMN12251156 | SRR10905825 | GCA 010599665.1 | N/A |
| PDT000686760.2 | SAMN12251153 | SAMN12251153 | SRR10905828 | GCA 010599685.1 | N/A |
| PDT000686761.2 | SAMN12251155 | SAMN12251155 | SRR10905826 | GCA 010599695.1 | N/A |
| PDT000686762.2 | SAMN12251154 | SAMN12251154 | SRR10905827 | GCA 010599725.1 | N/A |
| PDT000686763.2 | SAMN12251152 | SAMN12251152 | SRR10905829 | GCA 010599745.1 | N/A |
| PDT000686764.2 | SAMN12251151 | SAMN12251151 | SRR10905830 | GCA 010599735.1 | N/A |
| PDT000686765.2 | SAMN12251150 | SAMN12251150 | SRR10905831 | GCA 010599785.1 | N/A |
| PDT000686766.2 | SAMN12251149 | SAMN12251149 | SRR10905832 | GCA 010599795.1 | N/A |
| PDT000686767.2 | SAMN12251147 | SAMN12251147 | SRR10905835 | GCA 010599825.1 | N/A |
| PDT000686768.2 | SAMN12251148 | SAMN12251148 | SRR10905834 | GCA 010599835.1 | N/A |
| PDT000686770.2 | SAMN12251142 | SAMN12251142 | SRR10905840 | GCA 010599885.1 | N/A |
| PDT000686771.2 | SAMN12251138 | SAMN12251138 | SRR10905845 | GCA 010599905.1 | N/A |
| PDT000686772.2 | SAMN12251191 | SAMN12251191 | SRR10905467 | GCA 010602735.1 | N/A |
| PDT000686773.2 | SAMN12251195 | SAMN12251195 | SRR10905463 | GCA 010602755.1 | N/A |
| PDT000686775.2 | SAMN12251190 | SAMN12251190 | SRR10905468 | GCA 010602795.1 | N/A |
| PDT000686776.2 | SAMN12251183 | SAMN12251183 | SRR10905476 | GCA 010602825.1 | N/A |
| PDT000686778.2 | SAMN12251178 | SAMN12251178 | SRR10905578 | GCA 010602865.1 | N/A |
| PDT000686779.2 | SAMN12251174 | SAMN12251174 | SRR10905582 | GCA 010602885.1 | N/A |
| PDT000686780.2 | SAMN12251173 | SAMN12251173 | SRR10905583 | GCA 010602895.1 | N/A |
| PDT000686781.2 | SAMN12251143 | SAMN12251143 | SRR10905839 | GCA 010602935.1 | N/A |
| PDT000686782.2 | SAMN12251167 | SAMN12251167 | SRR10905590 | GCA 010602925.1 | N/A |
| PDT000686783.2 | SAMN12251166 | SAMN12251166 | SRR10905591 | GCA 010602945.1 | N/A |
| PDT000686784.2 | SAMN12251140 | SAMN12251140 | SRR10905842 | GCA 010602985.1 | N/A |
| PDT000686785.2 | SAMN12251141 | SAMN12251141 | SRR10905841 | GCA 010602995.1 | N/A |
| PDT000686786.2 | SAMN12251139 | SAMN12251139 | SRR10905843 | GCA 010603025.1 | N/A |
| PDT000686787.2 | SAMN12251136 | SAMN12251136 | SRR10905847 | GCA 010603035.1 | N/A |
| PDT000686788.2 | SAMN12251137 | SAMN12251137 | SRR10905846 | GCA 010603045.1 | N/A |
| PDT000686789.2 | SAMN12251134 | SAMN12251134 | SRR10905483 | GCA 010603085.1 | N/A |
| PDT000686790.2 | SAMN12251135 | SAMN12251135 | SRR10905482 | GCA 010603095.1 | N/A |
| PDT000686791.2 | SAMN12251133 | SAMN12251133 | SRR10905484 | GCA 010603125.1 | N/A |
| PDT000686792.2 | SAMN12251132 | SAMN12251132 | SRR10905485 | GCA 010603145.1 | N/A |
| PDT000686793.2 | SAMN12251131 | SAMN12251131 | SRR10905486 | GCA 010603155.1 | N/A |
| PDT000686794.2 | SAMN12251128 | SAMN12251128 | SRR10905490 | GCA 010603195.1 | N/A |
| PDT000686795.2 | SAMN12251129 | SAMN12251129 | SRR10905488 | GCA 010603185.1 | N/A |
| PDT000686796.2 | SAMN12251130 | SAMN12251130 | SRR10905487 | GCA 010603205.1 | N/A |
| PDT000686797.2 | SAMN12251127 | SAMN12251127 | SRR10905491 | GCA 010603245.1 | N/A |
| PDT000686798.2 | SAMN12251126 | SAMN12251126 | SRR10905492 | GCA 010603265.1 | N/A |
| PDT000686799.2 | SAMN12251123 | SAMN12251123 | SRR10905495 | GCA 010603295.1 | N/A |
| PDT000686800.2 | SAMN12251124 | SAMN12251124 | SRR10905494 | GCA 010603275.1 | N/A |
| PDT000686801.2 | SAMN12251125 | SAMN12251125 | SRR10905493 | GCA 010603325.1 | N/A |
| PDT000686802.2 | SAMN12251122 | SAMN12251122 | SRR10905496 | GCA 010603335.1 | N/A |
| PDT000686803.2 | SAMN12251120 | SAMN12251120 | SRR10905498 | GCA 010603365.1 | N/A |
| PDT000686804.2 | SAMN12251121 | SAMN12251121 | SRR10905497 | GCA 010603375.1 | N/A |
| PDT000686805.2 | SAMN12251119 | SAMN12251119 | SRR10905499 | GCA 010603385.1 | N/A |
| PDT000686806.2 | SAMN12251118 | SAMN12251118 | SRR10905501 | GCA 010603425.1 | N/A |
| PDT000686807.2 | SAMN12251117 | SAMN12251117 | SRR10905502 | GCA 010603435.1 | N/A |

|                |              |              |             |                 |     |
|----------------|--------------|--------------|-------------|-----------------|-----|
| PDT000686808.2 | SAMN12251114 | SAMN12251114 | SRR10905505 | GCA 010603465.1 | N/A |
| PDT000686809.2 | SAMN12251116 | SAMN12251116 | SRR10905503 | GCA 010603475.1 | N/A |
| PDT000686810.2 | SAMN12251112 | SAMN12251112 | SRR10906029 | GCA 010603505.1 | N/A |
| PDT000686811.2 | SAMN12251113 | SAMN12251113 | SRR10906028 | GCA 010603525.1 | N/A |
| PDT000686812.2 | SAMN12251115 | SAMN12251115 | SRR10905504 | GCA 010603545.1 | N/A |
| PDT000686814.2 | SAMN12251111 | SAMN12251111 | SRR10906030 | GCA 010603565.1 | N/A |
| PDT000686817.2 | SAMN12251106 | SAMN12251106 | SRR10906036 | GCA 010603645.1 | N/A |
| PDT000686818.2 | SAMN12251104 | SAMN12251104 | SRR10906038 | GCA 010603655.1 | N/A |
| PDT000686819.2 | SAMN12251107 | SAMN12251107 | SRR10906035 | GCA 010603685.1 | N/A |
| PDT000686820.2 | SAMN12251105 | SAMN12251105 | SRR10906037 | GCA 010603695.1 | N/A |
| PDT000686821.2 | SAMN12251103 | SAMN12251103 | SRR10906039 | GCA 010603725.1 | N/A |
| PDT000686822.2 | SAMN12251102 | SAMN12251102 | SRR10906040 | GCA 010603745.1 | N/A |
| PDT000686823.2 | SAMN12251101 | SAMN12251101 | SRR10906041 | GCA 010603765.1 | N/A |
| PDT000686824.2 | SAMN12251099 | SAMN12251099 | SRR10906043 | GCA 010603785.1 | N/A |
| PDT000686826.2 | SAMN12251100 | SAMN12251100 | SRR10906042 | GCA 010603805.1 | N/A |
| PDT000686895.2 | SAMN12251233 | SAMN12251233 | SRR10905548 | GCA 010609625.1 | N/A |
| PDT000686896.2 | SAMN12251234 | SAMN12251234 | SRR10905547 | GCA 010609635.1 | N/A |
| PDT000686897.2 | SAMN12251235 | SAMN12251235 | SRR10905545 | GCA 010609665.1 | N/A |
| PDT000686898.2 | SAMN12251231 | SAMN12251231 | SRR10905550 | GCA 010609685.1 | N/A |
| PDT000686899.2 | SAMN12251230 | SAMN12251230 | SRR10905551 | GCA 010609695.1 | N/A |
| PDT000686900.2 | SAMN12251229 | SAMN12251229 | SRR10905552 | GCA 010609705.1 | N/A |
| PDT000686901.2 | SAMN12251232 | SAMN12251232 | SRR10905549 | GCA 010609715.1 | N/A |
| PDT000686902.2 | SAMN12251227 | SAMN12251227 | SRR10906004 | GCA 010609735.1 | N/A |
| PDT000686903.2 | SAMN12251222 | SAMN12251222 | SRR10906010 | GCA 010609785.1 | N/A |
| PDT000686904.2 | SAMN12251226 | SAMN12251226 | SRR10906005 | GCA 010609805.1 | N/A |
| PDT000686905.2 | SAMN12251223 | SAMN12251223 | SRR10906009 | GCA 010609795.1 | N/A |
| PDT000686906.2 | SAMN12251224 | SAMN12251224 | SRR10906008 | GCA 010609815.1 | N/A |
| PDT000686907.2 | SAMN12251221 | SAMN12251221 | SRR10906011 | GCA 010609845.1 | N/A |
| PDT000686908.2 | SAMN12251220 | SAMN12251220 | SRR10906012 | GCA 010609885.1 | N/A |
| PDT000686909.2 | SAMN12251219 | SAMN12251219 | SRR10906013 | GCA 010609895.1 | N/A |
| PDT000686910.2 | SAMN12251217 | SAMN12251217 | SRR10906015 | GCA 010609935.1 | N/A |
| PDT000686911.2 | SAMN12251218 | SAMN12251218 | SRR10906014 | GCA 010609925.1 | N/A |
| PDT000686912.2 | SAMN12251216 | SAMN12251216 | SRR10906016 | GCA 010609945.1 | N/A |
| PDT000686913.2 | SAMN12251212 | SAMN12251212 | SRR10906021 | GCA 010609985.1 | N/A |
| PDT000686915.2 | SAMN12251206 | SAMN12251206 | SRR10906025 | GCA 010610025.1 | N/A |
| PDT000686916.2 | SAMN12251207 | SAMN12251207 | SRR10906024 | GCA 010610045.1 | N/A |
| PDT000686917.2 | SAMN12251210 | SAMN12251210 | SRR10906023 | GCA 010610035.1 | N/A |
| PDT000686918.2 | SAMN12251203 | SAMN12251203 | SRR10906026 | GCA 010610085.1 | N/A |
| PDT000686919.2 | SAMN12251202 | SAMN12251202 | SRR10906027 | GCA 010610105.1 | N/A |
| PDT000686920.2 | SAMN12251200 | SAMN12251200 | SRR10905458 | GCA 010610115.1 | N/A |
| PDT000686924.2 | SAMN12251228 | SAMN12251228 | SRR10905553 | GCA 010612565.1 | N/A |
| PDT000686925.2 | SAMN12251213 | SAMN12251213 | SRR10906020 | GCA 010612585.1 | N/A |
| PDT000686926.2 | SAMN12251225 | SAMN12251225 | SRR10906006 | GCA 010612615.1 | N/A |
| PDT000686928.2 | SAMN12251211 | SAMN12251211 | SRR10906022 | GCA 010612685.1 | N/A |
| PDT000693747.2 | SAMN10686908 | SAMN10686908 | SRR8385989  | GCA 011033135.1 | N/A |
| PDT000712057.2 | SAMN14230757 | SAMN14230757 | SRR11214697 | GCA 011394235.1 | N/A |
| PDT000712058.2 | SAMN14230770 | SAMN14230770 | SRR11214712 | GCA 011394245.1 | N/A |
| PDT000712059.2 | SAMN14230775 | SAMN14230775 | SRR11214706 | GCA 011394275.1 | N/A |
| PDT000712060.2 | SAMN14230766 | SAMN14230766 | SRR11214716 | GCA 011394295.1 | N/A |
| PDT000712061.2 | SAMN14230773 | SAMN14230773 | SRR11214708 | GCA 011394305.1 | N/A |
| PDT000712062.2 | SAMN14230774 | SAMN14230774 | SRR11214707 | GCA 011394345.1 | N/A |
| PDT000712064.2 | SAMN14230780 | SAMN14230780 | SRR11214701 | GCA 011394385.1 | N/A |
| PDT000712065.2 | SAMN14230752 | SAMN14230752 | SRR11214722 | GCA 011394375.1 | N/A |
| PDT000712066.2 | SAMN14230767 | SAMN14230767 | SRR11214715 | GCA 011394395.1 | N/A |
| PDT000712067.2 | SAMN14230772 | SAMN14230772 | SRR11214709 | GCA 011394435.1 | N/A |
| PDT000712068.2 | SAMN14230754 | SAMN14230754 | SRR11214710 | GCA 011394455.1 | N/A |
| PDT000712069.2 | SAMN14230759 | SAMN14230759 | SRR11214695 | GCA 011394475.1 | N/A |
| PDT000712070.2 | SAMN14230753 | SAMN14230753 | SRR11214721 | GCA 011394515.1 | N/A |
| PDT000712071.2 | SAMN14230777 | SAMN14230777 | SRR11214704 | GCA 011394485.1 | N/A |
| PDT000712072.2 | SAMN14230771 | SAMN14230771 | SRR11214711 | GCA 011394535.1 | N/A |
| PDT000712074.2 | SAMN14230763 | SAMN14230763 | SRR11214719 | GCA 011394595.1 | N/A |
| PDT000712075.2 | SAMN14230758 | SAMN14230758 | SRR11214696 | GCA 011394615.1 | N/A |
| PDT000712076.2 | SAMN14230760 | SAMN14230760 | SRR11214694 | GCA 011394625.1 | N/A |
| PDT000712077.2 | SAMN14230756 | SAMN14230756 | SRR11214698 | GCA 011394645.1 | N/A |
| PDT000712078.2 | SAMN14230768 | SAMN14230768 | SRR11214714 | GCA 011394675.1 | N/A |
| PDT000712079.2 | SAMN14230778 | SAMN14230778 | SRR11214703 | GCA 011394695.1 | N/A |
| PDT000712080.2 | SAMN14230761 | SAMN14230761 | SRR11214693 | GCA 011394705.1 | N/A |
| PDT000712081.2 | SAMN14230765 | SAMN14230765 | SRR11214717 | GCA 011394735.1 | N/A |

|                |                |                |             |                 |     |
|----------------|----------------|----------------|-------------|-----------------|-----|
| PDT000712083.2 | SAMN14230755   | SAMN14230755   | SRR11214699 | GCA 011394775.1 | N/A |
| PDT000712084.2 | SAMN14230781   | SAMN14230781   | SRR11214700 | GCA 011394795.1 | N/A |
| PDT000712085.2 | SAMN14230779   | SAMN14230779   | SRR11214702 | GCA 011394815.1 | N/A |
| PDT000712086.2 | SAMN14230762   | SAMN14230762   | SRR11214720 | GCA 011394825.1 | N/A |
| PDT000722914.2 | SAMN10689385   | SAMN10689385   | SRR8389106  | GCA 012274615.1 | N/A |
| PDT000737602.2 | SAMN14830786   | SAMN14830786   | SRR12147095 | GCA 013008375.1 | N/A |
| PDT000752326.2 | SAMN14971353   | SAMN14971353   | SRR11829884 | GCA 013155165.1 | N/A |
| PDT000752327.2 | SAMN14971352   | SAMN14971352   | SRR11829885 | GCA 013155185.1 | N/A |
| PDT000752328.2 | SAMN14971354   | SAMN14971354   | SRR11829883 | GCA 013155205.1 | N/A |
| PDT000766268.2 | SAMN14906923   | SAMN14906923   | SRR11787441 | GCA 013337945.1 | N/A |
| PDT000766274.2 | SAMN14906916   | SAMN14906916   | SRR11787386 | GCA 013338045.1 | N/A |
| PDT000766275.2 | SAMN14906912   | SAMN14906912   | SRR11787391 | GCA 013338085.1 | N/A |
| PDT000766279.2 | SAMN14906913   | SAMN14906913   | SRR11787390 | GCA 013338165.1 | N/A |
| PDT000766294.2 | SAMN14906896   | SAMN14906896   | SRR11787424 | GCA 013338465.1 | N/A |
| PDT000766305.2 | SAMN14906882   | SAMN14906882   | SRR11787376 | GCA 013338685.1 | N/A |
| PDT000772192.2 | SAMN15214618   | SAMN15214618   | SRR12000040 | GCA 013366385.1 | N/A |
| PDT000772334.2 | SAMN15215142   | SAMN15215142   | SRR12000190 | GCA 013372685.1 | N/A |
| PDT000772339.2 | SAMEA103891212 | SAMEA103891212 | ERR2533443  | GCA 903811395.1 | N/A |
| PDT000772341.2 | SAMEA103891214 | SAMEA103891214 | ERR2533445  | GCA 903811415.1 | N/A |
| PDT000772342.2 | SAMEA103891215 | SAMEA103891215 | ERR2533446  | GCA 903811425.1 | N/A |
| PDT000772343.2 | SAMEA103891216 | SAMEA103891216 | ERR2533447  | GCA 903811435.1 | N/A |
| PDT000772344.2 | SAMEA103891217 | SAMEA103891217 | ERR2533448  | GCA 903811445.1 | N/A |
| PDT000772346.2 | SAMEA103891219 | SAMEA103891219 | ERR2533450  | GCA 903811455.1 | N/A |
| PDT000772347.2 | SAMEA103891220 | SAMEA103891220 | ERR2533451  | GCA 903811475.1 | N/A |
| PDT000772348.2 | SAMEA103891221 | SAMEA103891221 | ERR2533452  | GCA 903811485.1 | N/A |
| PDT000772350.2 | SAMEA103891223 | SAMEA103891223 | ERR2533454  | GCA 903811505.1 | N/A |
| PDT000772351.2 | SAMEA103891224 | SAMEA103891224 | ERR2533455  | GCA 903811515.1 | N/A |
| PDT000772354.2 | SAMEA103891227 | SAMEA103891227 | ERR2533458  | GCA 903811545.1 | N/A |
| PDT000772356.2 | SAMEA103891229 | SAMEA103891229 | ERR2533460  | GCA 903811565.1 | N/A |
| PDT000772357.2 | SAMEA103891230 | SAMEA103891230 | ERR2533461  | GCA 903811575.1 | N/A |
| PDT000772358.2 | SAMEA103891231 | SAMEA103891231 | ERR2533462  | GCA 903811585.1 | N/A |
| PDT000772360.2 | SAMEA103891233 | SAMEA103891233 | ERR2533464  | GCA 903811605.1 | N/A |
| PDT000772361.2 | SAMEA103891234 | SAMEA103891234 | ERR2533465  | GCA 903811615.1 | N/A |
| PDT000772363.2 | SAMEA103891236 | SAMEA103891236 | ERR2533467  | GCA 903811635.1 | N/A |
| PDT000772365.2 | SAMEA103891238 | SAMEA103891238 | ERR2533469  | GCA 903811645.1 | N/A |
| PDT000772366.2 | SAMEA103891239 | SAMEA103891239 | ERR2533470  | GCA 903811665.1 | N/A |
| PDT000772370.2 | SAMEA103891243 | SAMEA103891243 | ERR2533474  | GCA 903811705.1 | N/A |
| PDT000772371.2 | SAMEA103891244 | SAMEA103891244 | ERR2533475  | GCA 903811715.1 | N/A |
| PDT000772374.2 | SAMEA103891247 | SAMEA103891247 | ERR2533478  | GCA 903811755.1 | N/A |
| PDT000772378.2 | SAMEA103891251 | SAMEA103891251 | ERR2533482  | GCA 903811795.1 | N/A |
| PDT000772379.2 | SAMEA103891252 | SAMEA103891252 | ERR2533483  | GCA 903811785.1 | N/A |
| PDT000772380.2 | SAMEA103891253 | SAMEA103891253 | ERR2533484  | GCA 903811805.1 | N/A |
| PDT000772382.2 | SAMEA103891255 | SAMEA103891255 | ERR2533486  | GCA 903811825.1 | N/A |
| PDT000772384.2 | SAMEA103891257 | SAMEA103891257 | ERR2533488  | GCA 903811845.1 | N/A |
| PDT000772386.2 | SAMEA103891259 | SAMEA103891259 | ERR2533490  | GCA 903811865.1 | N/A |
| PDT000772387.2 | SAMEA103891260 | SAMEA103891260 | ERR2533491  | GCA 903811875.1 | N/A |
| PDT000772388.2 | SAMEA103891261 | SAMEA103891261 | ERR2533492  | GCA 903811885.1 | N/A |
| PDT000772389.2 | SAMEA103891262 | SAMEA103891262 | ERR2533493  | GCA 903811895.1 | N/A |
| PDT000772391.2 | SAMEA103891264 | SAMEA103891264 | ERR2533495  | GCA 903811915.1 | N/A |
| PDT000772392.2 | SAMEA103891265 | SAMEA103891265 | ERR2533496  | GCA 903811935.1 | N/A |
| PDT000772395.2 | SAMEA103891268 | SAMEA103891268 | ERR2533499  | GCA 903811965.1 | N/A |
| PDT000772398.2 | SAMEA103891271 | SAMEA103891271 | ERR2533502  | GCA 903811985.1 | N/A |
| PDT000772401.2 | SAMEA103891274 | SAMEA103891274 | ERR2533505  | GCA 903812015.1 | N/A |
| PDT000772404.2 | SAMEA103891277 | SAMEA103891277 | ERR2533508  | GCA 903812045.1 | N/A |
| PDT000772407.2 | SAMEA103891280 | SAMEA103891280 | ERR2533511  | GCA 903812075.1 | N/A |
| PDT000772409.2 | SAMEA103891282 | SAMEA103891282 | ERR2533513  | GCA 903812105.1 | N/A |
| PDT000772411.2 | SAMEA103891284 | SAMEA103891284 | ERR2533515  | GCA 903812125.1 | N/A |
| PDT000772412.2 | SAMEA103891285 | SAMEA103891285 | ERR2533516  | GCA 903812135.1 | N/A |
| PDT000772413.2 | SAMEA103891286 | SAMEA103891286 | ERR2533517  | GCA 903812145.1 | N/A |
| PDT000772414.2 | SAMEA103891287 | SAMEA103891287 | ERR2533518  | GCA 903812185.1 | N/A |
| PDT000772415.2 | SAMEA103891289 | SAMEA103891289 | ERR2533520  | GCA 903812195.1 | N/A |
| PDT000772416.2 | SAMEA103891290 | SAMEA103891290 | ERR2533521  | GCA 903812155.1 | N/A |
| PDT000772417.2 | SAMEA103891291 | SAMEA103891291 | ERR2533522  | GCA 903812175.1 | N/A |
| PDT000772418.2 | SAMEA103891292 | SAMEA103891292 | ERR2533523  | GCA 903812165.1 | N/A |
| PDT000772421.2 | SAMEA103891295 | SAMEA103891295 | ERR2533526  | GCA 903812225.1 | N/A |
| PDT000772424.2 | SAMEA103891298 | SAMEA103891298 | ERR2533529  | GCA 903812255.1 | N/A |
| PDT000772425.2 | SAMEA103891299 | SAMEA103891299 | ERR2533530  | GCA 903812275.1 | N/A |
| PDT000772426.2 | SAMEA103891300 | SAMEA103891300 | ERR2533531  | GCA 903812285.1 | N/A |

|                |                |                |            |                 |     |
|----------------|----------------|----------------|------------|-----------------|-----|
| PDT000772427.2 | SAMEA103891301 | SAMEA103891301 | ERR2533532 | GCA 903812305.1 | N/A |
| PDT000772431.2 | SAMEA103891305 | SAMEA103891305 | ERR2533536 | GCA 903812405.1 | N/A |
| PDT000772432.2 | SAMEA103891306 | SAMEA103891306 | ERR2533537 | GCA 903812415.1 | N/A |
| PDT000772433.2 | SAMEA103891307 | SAMEA103891307 | ERR2533538 | GCA 903812425.1 | N/A |
| PDT000772439.2 | SAMEA103891313 | SAMEA103891313 | ERR2533544 | GCA 903812535.1 | N/A |
| PDT000772440.2 | SAMEA103891314 | SAMEA103891314 | ERR2533545 | GCA 903812555.1 | N/A |
| PDT000772444.2 | SAMEA103891318 | SAMEA103891318 | ERR2533549 | GCA 903812625.1 | N/A |
| PDT000772447.2 | SAMEA103891321 | SAMEA103891321 | ERR2533552 | GCA 903812675.1 | N/A |
| PDT000772448.2 | SAMEA103891322 | SAMEA103891322 | ERR2533554 | GCA 903812715.1 | N/A |
| PDT000772453.2 | SAMEA103891327 | SAMEA103891327 | ERR2533559 | GCA 903812765.1 | N/A |
| PDT000772454.2 | SAMEA103891328 | SAMEA103891328 | ERR2533560 | GCA 903812775.1 | N/A |
| PDT000772459.2 | SAMEA103891333 | SAMEA103891333 | ERR2533564 | GCA 903812815.1 | N/A |
| PDT000772460.2 | SAMEA103891334 | SAMEA103891334 | ERR2533565 | GCA 903812825.1 | N/A |
| PDT000772462.2 | SAMEA103891336 | SAMEA103891336 | ERR2533567 | GCA 903812855.1 | N/A |
| PDT000772470.2 | SAMEA103891344 | SAMEA103891344 | ERR2533575 | GCA 903812925.1 | N/A |
| PDT000772473.2 | SAMEA103891347 | SAMEA103891347 | ERR2533578 | GCA 903812955.1 | N/A |
| PDT000772474.2 | SAMEA103891348 | SAMEA103891348 | ERR2533579 | GCA 903812965.1 | N/A |
| PDT000772475.2 | SAMEA103891349 | SAMEA103891349 | ERR2533580 | GCA 903812975.1 | N/A |
| PDT000772477.2 | SAMEA103891351 | SAMEA103891351 | ERR2533582 | GCA 903812995.1 | N/A |
| PDT000772478.2 | SAMEA103891352 | SAMEA103891352 | ERR2533583 | GCA 903813005.1 | N/A |
| PDT000772479.2 | SAMEA103891353 | SAMEA103891353 | ERR2533584 | GCA 903813015.1 | N/A |
| PDT000772480.2 | SAMEA103891354 | SAMEA103891354 | ERR2533585 | GCA 903813025.1 | N/A |
| PDT000772481.2 | SAMEA103891355 | SAMEA103891355 | ERR2533586 | GCA 903813035.1 | N/A |
| PDT000772484.2 | SAMEA103891358 | SAMEA103891358 | ERR2533589 | GCA 903813065.1 | N/A |
| PDT000772486.2 | SAMEA103891360 | SAMEA103891360 | ERR2533591 | GCA 903800675.1 | N/A |
| PDT000772487.2 | SAMEA103891361 | SAMEA103891361 | ERR2533592 | GCA 903800725.1 | N/A |
| PDT000772489.2 | SAMEA103891363 | SAMEA103891363 | ERR2533594 | GCA 903800815.1 | N/A |
| PDT000772491.2 | SAMEA103891365 | SAMEA103891365 | ERR2533596 | GCA 903800825.1 | N/A |
| PDT000772493.2 | SAMEA103891367 | SAMEA103891367 | ERR2533598 | GCA 903800895.1 | N/A |
| PDT000772494.2 | SAMEA103891368 | SAMEA103891368 | ERR2533599 | GCA 903800875.1 | N/A |
| PDT000772495.2 | SAMEA103891369 | SAMEA103891369 | ERR2533600 | GCA 903800925.1 | N/A |
| PDT000772496.2 | SAMEA103891370 | SAMEA103891370 | ERR2533601 | GCA 903800945.1 | N/A |
| PDT000772497.2 | SAMEA103891371 | SAMEA103891371 | ERR2533602 | GCA 903800965.1 | N/A |
| PDT000772498.2 | SAMEA103891372 | SAMEA103891372 | ERR2533603 | GCA 903801005.1 | N/A |
| PDT000772499.2 | SAMEA103891373 | SAMEA103891373 | ERR2533604 | GCA 903801015.1 | N/A |
| PDT000772500.2 | SAMEA103891374 | SAMEA103891374 | ERR2533605 | GCA 903800985.1 | N/A |
| PDT000772501.2 | SAMEA103891375 | SAMEA103891375 | ERR2533606 | GCA 903800995.1 | N/A |
| PDT000772502.2 | SAMEA103891376 | SAMEA103891376 | ERR2533607 | GCA 903801025.1 | N/A |
| PDT000772503.2 | SAMEA103891377 | SAMEA103891377 | ERR2533608 | GCA 903801035.1 | N/A |
| PDT000772505.2 | SAMEA103891379 | SAMEA103891379 | ERR2533610 | GCA 903801095.1 | N/A |
| PDT000772506.2 | SAMEA103891380 | SAMEA103891380 | ERR2533611 | GCA 903801105.1 | N/A |
| PDT000772509.2 | SAMEA103891383 | SAMEA103891383 | ERR2533614 | GCA 903801155.1 | N/A |
| PDT000772511.2 | SAMEA103891385 | SAMEA103891385 | ERR2533616 | GCA 903801205.1 | N/A |
| PDT000772513.2 | SAMEA103891387 | SAMEA103891387 | ERR2533618 | GCA 903801295.1 | N/A |
| PDT000772514.2 | SAMEA103891388 | SAMEA103891388 | ERR2533619 | GCA 903801305.1 | N/A |
| PDT000772515.2 | SAMEA103891389 | SAMEA103891389 | ERR2533620 | GCA 903801315.1 | N/A |
| PDT000772516.2 | SAMEA103891390 | SAMEA103891390 | ERR2533621 | GCA 903801345.1 | N/A |
| PDT000772517.2 | SAMEA103891391 | SAMEA103891391 | ERR2533622 | GCA 903801365.1 | N/A |
| PDT000772519.2 | SAMEA103891393 | SAMEA103891393 | ERR2533624 | GCA 903801385.1 | N/A |
| PDT000772520.2 | SAMEA103891394 | SAMEA103891394 | ERR2533625 | GCA 903801395.1 | N/A |
| PDT000772521.2 | SAMEA103891395 | SAMEA103891395 | ERR2533626 | GCA 903801415.1 | N/A |
| PDT000772524.2 | SAMEA103891398 | SAMEA103891398 | ERR2533629 | GCA 903801435.1 | N/A |
| PDT000772525.2 | SAMEA103891399 | SAMEA103891399 | ERR2533630 | GCA 903801455.1 | N/A |
| PDT000772526.2 | SAMEA103891400 | SAMEA103891400 | ERR2533631 | GCA 903801465.1 | N/A |
| PDT000772527.2 | SAMEA103891401 | SAMEA103891401 | ERR2533632 | GCA 903801475.1 | N/A |
| PDT000772529.2 | SAMEA103891403 | SAMEA103891403 | ERR2533634 | GCA 903801515.1 | N/A |
| PDT000772530.2 | SAMEA103891404 | SAMEA103891404 | ERR2533635 | GCA 903801525.1 | N/A |
| PDT000772531.2 | SAMEA103891405 | SAMEA103891405 | ERR2533636 | GCA 903801535.1 | N/A |
| PDT000772532.2 | SAMEA103891406 | SAMEA103891406 | ERR2533637 | GCA 903801545.1 | N/A |
| PDT000772533.2 | SAMEA103891407 | SAMEA103891407 | ERR2533638 | GCA 903801555.1 | N/A |
| PDT000772534.2 | SAMEA103891408 | SAMEA103891408 | ERR2533639 | GCA 903801565.1 | N/A |
| PDT000772535.2 | SAMEA103891410 | SAMEA103891410 | ERR2533640 | GCA 903801585.1 | N/A |
| PDT000772536.2 | SAMEA103891411 | SAMEA103891411 | ERR2533641 | GCA 903801595.1 | N/A |
| PDT000772537.2 | SAMEA103891412 | SAMEA103891412 | ERR2533642 | GCA 903801605.1 | N/A |
| PDT000772538.2 | SAMEA103891413 | SAMEA103891413 | ERR2533643 | GCA 903801625.1 | N/A |
| PDT000772539.2 | SAMEA103891414 | SAMEA103891414 | ERR2533644 | GCA 903801635.1 | N/A |
| PDT000772540.2 | SAMEA103891415 | SAMEA103891415 | ERR2533645 | GCA 903801645.1 | N/A |
| PDT000772541.2 | SAMEA103891416 | SAMEA103891416 | ERR2533646 | GCA 903801665.1 | N/A |



|                |                |                |            |                 |     |
|----------------|----------------|----------------|------------|-----------------|-----|
| PDT000772627.2 | SAMEA103891503 | SAMEA103891503 | ERR2533733 | GCA 903802635.1 | N/A |
| PDT000772628.2 | SAMEA103891504 | SAMEA103891504 | ERR2533734 | GCA 903802615.1 | N/A |
| PDT000772629.2 | SAMEA103891506 | SAMEA103891506 | ERR2533735 | GCA 903802655.1 | N/A |
| PDT000772630.2 | SAMEA103891507 | SAMEA103891507 | ERR2533736 | GCA 903802645.1 | N/A |
| PDT000772631.2 | SAMEA103891508 | SAMEA103891508 | ERR2533737 | GCA 903802665.1 | N/A |
| PDT000772632.2 | SAMEA103891509 | SAMEA103891509 | ERR2533738 | GCA 903802675.1 | N/A |
| PDT000772633.2 | SAMEA103891510 | SAMEA103891510 | ERR2533739 | GCA 903802685.1 | N/A |
| PDT000772634.2 | SAMEA103891511 | SAMEA103891511 | ERR2533740 | GCA 903802695.1 | N/A |
| PDT000772635.2 | SAMEA103891512 | SAMEA103891512 | ERR2533741 | GCA 903802705.1 | N/A |
| PDT000772636.2 | SAMEA103891513 | SAMEA103891513 | ERR2533742 | GCA 903802715.1 | N/A |
| PDT000772637.2 | SAMEA103891514 | SAMEA103891514 | ERR2533743 | GCA 903802725.1 | N/A |
| PDT000772638.2 | SAMEA103891515 | SAMEA103891515 | ERR2533744 | GCA 903802745.1 | N/A |
| PDT000772639.2 | SAMEA103891516 | SAMEA103891516 | ERR2533745 | GCA 903802735.1 | N/A |
| PDT000772641.2 | SAMEA103891518 | SAMEA103891518 | ERR2533747 | GCA 903802755.1 | N/A |
| PDT000772642.2 | SAMEA103891519 | SAMEA103891519 | ERR2533748 | GCA 903802765.1 | N/A |
| PDT000772643.2 | SAMEA103891520 | SAMEA103891520 | ERR2533749 | GCA 903802785.1 | N/A |
| PDT000772644.2 | SAMEA103891521 | SAMEA103891521 | ERR2533750 | GCA 903802795.1 | N/A |
| PDT000772645.2 | SAMEA103891522 | SAMEA103891522 | ERR2533751 | GCA 903802815.1 | N/A |
| PDT000772646.2 | SAMEA103891523 | SAMEA103891523 | ERR2533752 | GCA 903802805.1 | N/A |
| PDT000772647.2 | SAMEA103891524 | SAMEA103891524 | ERR2533753 | GCA 903802825.1 | N/A |
| PDT000772648.2 | SAMEA103891525 | SAMEA103891525 | ERR2533754 | GCA 903802855.1 | N/A |
| PDT000772649.2 | SAMEA103891526 | SAMEA103891526 | ERR2533755 | GCA 903802845.1 | N/A |
| PDT000772653.2 | SAMEA103891530 | SAMEA103891530 | ERR2533759 | GCA 903802885.1 | N/A |
| PDT000772654.2 | SAMEA103891531 | SAMEA103891531 | ERR2533760 | GCA 903802895.1 | N/A |
| PDT000772655.2 | SAMEA103891532 | SAMEA103891532 | ERR2533761 | GCA 903802915.1 | N/A |
| PDT000772656.2 | SAMEA103891533 | SAMEA103891533 | ERR2533762 | GCA 903802905.1 | N/A |
| PDT000772657.2 | SAMEA103891534 | SAMEA103891534 | ERR2533763 | GCA 903802925.1 | N/A |
| PDT000772659.2 | SAMEA103891536 | SAMEA103891536 | ERR2533765 | GCA 903802935.1 | N/A |
| PDT000772660.2 | SAMEA103891537 | SAMEA103891537 | ERR2533766 | GCA 903802955.1 | N/A |
| PDT000772661.2 | SAMEA103891538 | SAMEA103891538 | ERR2533767 | GCA 903802975.1 | N/A |
| PDT000772662.2 | SAMEA103891539 | SAMEA103891539 | ERR2533768 | GCA 903802985.1 | N/A |
| PDT000772663.2 | SAMEA103891540 | SAMEA103891540 | ERR2533769 | GCA 903802965.1 | N/A |
| PDT000772664.2 | SAMEA103891541 | SAMEA103891541 | ERR2533770 | GCA 903802995.1 | N/A |
| PDT000772665.2 | SAMEA103891542 | SAMEA103891542 | ERR2533771 | GCA 903803005.1 | N/A |
| PDT000772666.2 | SAMEA103891543 | SAMEA103891543 | ERR2533772 | GCA 903806605.1 | N/A |
| PDT000772667.2 | SAMEA103891544 | SAMEA103891544 | ERR2533773 | GCA 903806635.1 | N/A |
| PDT000772668.2 | SAMEA103891545 | SAMEA103891545 | ERR2533774 | GCA 903806935.1 | N/A |
| PDT000772670.2 | SAMEA103891547 | SAMEA103891547 | ERR2533776 | GCA 903806365.1 | N/A |
| PDT000772671.2 | SAMEA103891548 | SAMEA103891548 | ERR2533777 | GCA 903813095.1 | N/A |
| PDT000772672.2 | SAMEA103891549 | SAMEA103891549 | ERR2533778 | GCA 903813085.1 | N/A |
| PDT000772673.2 | SAMEA103891550 | SAMEA103891550 | ERR2533779 | GCA 903813105.1 | N/A |
| PDT000772674.2 | SAMEA103891551 | SAMEA103891551 | ERR2533780 | GCA 903813115.1 | N/A |
| PDT000772675.2 | SAMEA103891552 | SAMEA103891552 | ERR2533781 | GCA 903813125.1 | N/A |
| PDT000772676.2 | SAMEA103891553 | SAMEA103891553 | ERR2533782 | GCA 903813135.1 | N/A |
| PDT000772677.2 | SAMEA103891554 | SAMEA103891554 | ERR2533783 | GCA 903813145.1 | N/A |
| PDT000772678.2 | SAMEA103891555 | SAMEA103891555 | ERR2533784 | GCA 903813155.1 | N/A |
| PDT000772679.2 | SAMEA103891556 | SAMEA103891556 | ERR2533785 | GCA 903813165.1 | N/A |
| PDT000772680.2 | SAMEA103891557 | SAMEA103891557 | ERR2533786 | GCA 903813175.1 | N/A |
| PDT000772681.2 | SAMEA103891558 | SAMEA103891558 | ERR2533787 | GCA 903813185.1 | N/A |
| PDT000772682.2 | SAMEA103891559 | SAMEA103891559 | ERR2533788 | GCA 903813205.1 | N/A |
| PDT000772683.2 | SAMEA103891560 | SAMEA103891560 | ERR2533789 | GCA 903813195.1 | N/A |
| PDT000772684.2 | SAMEA103891561 | SAMEA103891561 | ERR2533790 | GCA 903813215.1 | N/A |
| PDT000772687.2 | SAMEA103891564 | SAMEA103891564 | ERR2533793 | GCA 903813245.1 | N/A |
| PDT000772690.2 | SAMEA103891567 | SAMEA103891567 | ERR2533796 | GCA 903813275.1 | N/A |
| PDT000772691.2 | SAMEA103891568 | SAMEA103891568 | ERR2533797 | GCA 903813285.1 | N/A |
| PDT000772692.2 | SAMEA103891569 | SAMEA103891569 | ERR2533798 | GCA 903813295.1 | N/A |
| PDT000772698.2 | SAMEA4008435   | SAMEA4008435   | ERR1723816 | GCA 903798435.1 | N/A |
| PDT000772699.2 | SAMEA4008436   | SAMEA4008436   | ERR1723817 | GCA 903798445.1 | N/A |
| PDT000772700.2 | SAMEA4008437   | SAMEA4008437   | ERR1723818 | GCA 903798455.1 | N/A |
| PDT000772701.2 | SAMEA4008438   | SAMEA4008438   | ERR1723819 | GCA 903798465.1 | N/A |
| PDT000772702.2 | SAMEA4008440   | SAMEA4008440   | ERR1723820 | GCA 903798475.1 | N/A |
| PDT000772704.2 | SAMEA4008442   | SAMEA4008442   | ERR1723822 | GCA 903798495.1 | N/A |
| PDT000772705.2 | SAMEA4008443   | SAMEA4008443   | ERR1723823 | GCA 903798505.1 | N/A |
| PDT000772706.2 | SAMEA4008444   | SAMEA4008444   | ERR1723824 | GCA 903798515.1 | N/A |
| PDT000772707.2 | SAMEA4008445   | SAMEA4008445   | ERR1723825 | GCA 903798525.1 | N/A |
| PDT000772708.2 | SAMEA4008446   | SAMEA4008446   | ERR1723826 | GCA 903798535.1 | N/A |
| PDT000772709.2 | SAMEA4008447   | SAMEA4008447   | ERR1723827 | GCA 903798545.1 | N/A |
| PDT000772710.2 | SAMEA4008448   | SAMEA4008448   | ERR1723828 | GCA 903798565.1 | N/A |

|               |              |              |            |                 |     |
|---------------|--------------|--------------|------------|-----------------|-----|
| PDT00072711.2 | SAMEA4008449 | SAMEA4008449 | ERR1723829 | GCA 903798555.1 | N/A |
| PDT00072712.2 | SAMEA4008450 | SAMEA4008450 | ERR1723830 | GCA 903798575.1 | N/A |
| PDT00072713.2 | SAMEA4008451 | SAMEA4008451 | ERR1723831 | GCA 903798595.1 | N/A |
| PDT00072715.2 | SAMEA4008453 | SAMEA4008453 | ERR1723833 | GCA 903798605.1 | N/A |
| PDT00072716.2 | SAMEA4008454 | SAMEA4008454 | ERR1723834 | GCA 903798615.1 | N/A |
| PDT00072718.2 | SAMEA4008456 | SAMEA4008456 | ERR1723836 | GCA 903798635.1 | N/A |
| PDT00072719.2 | SAMEA4008457 | SAMEA4008457 | ERR1723837 | GCA 903798645.1 | N/A |
| PDT00072720.2 | SAMEA4008458 | SAMEA4008458 | ERR1723838 | GCA 903798655.1 | N/A |
| PDT00072721.2 | SAMEA4008459 | SAMEA4008459 | ERR1723839 | GCA 903798675.1 | N/A |
| PDT00072722.2 | SAMEA4008460 | SAMEA4008460 | ERR1723840 | GCA 903798665.1 | N/A |
| PDT00072723.2 | SAMEA4008461 | SAMEA4008461 | ERR1723841 | GCA 903798685.1 | N/A |
| PDT00072724.2 | SAMEA4008462 | SAMEA4008462 | ERR1723842 | GCA 903798695.1 | N/A |
| PDT00072725.2 | SAMEA4008463 | SAMEA4008463 | ERR1723843 | GCA 903798705.1 | N/A |
| PDT00072727.2 | SAMEA4008465 | SAMEA4008465 | ERR1723845 | GCA 903798725.1 | N/A |
| PDT00072728.2 | SAMEA4008466 | SAMEA4008466 | ERR1723846 | GCA 903798735.1 | N/A |
| PDT00072729.2 | SAMEA4008467 | SAMEA4008467 | ERR1723847 | GCA 903798755.1 | N/A |
| PDT00072730.2 | SAMEA4008468 | SAMEA4008468 | ERR1723848 | GCA 903798745.1 | N/A |
| PDT00072731.2 | SAMEA4008469 | SAMEA4008469 | ERR1723849 | GCA 903798765.1 | N/A |
| PDT00072732.2 | SAMEA4008470 | SAMEA4008470 | ERR1723850 | GCA 903798775.1 | N/A |
| PDT00072733.2 | SAMEA4008471 | SAMEA4008471 | ERR1723851 | GCA 903798785.1 | N/A |
| PDT00072735.2 | SAMEA4008473 | SAMEA4008473 | ERR1723853 | GCA 903798805.1 | N/A |
| PDT00072736.2 | SAMEA4008474 | SAMEA4008474 | ERR1723854 | GCA 903798825.1 | N/A |
| PDT00072737.2 | SAMEA4008475 | SAMEA4008475 | ERR1723855 | GCA 903798815.1 | N/A |
| PDT00072739.2 | SAMEA4008477 | SAMEA4008477 | ERR1723857 | GCA 903798855.1 | N/A |
| PDT00072740.2 | SAMEA4008478 | SAMEA4008478 | ERR1723858 | GCA 903818645.1 | N/A |
| PDT00072741.2 | SAMEA4008479 | SAMEA4008479 | ERR1723859 | GCA 903798845.1 | N/A |
| PDT00072743.2 | SAMEA4008481 | SAMEA4008481 | ERR1723861 | GCA 903798865.1 | N/A |
| PDT00072745.2 | SAMEA4008483 | SAMEA4008483 | ERR1723863 | GCA 903798895.1 | N/A |
| PDT00072751.2 | SAMEA4008489 | SAMEA4008489 | ERR1723869 | GCA 903798955.1 | N/A |
| PDT00072754.2 | SAMEA4008493 | SAMEA4008493 | ERR1723873 | GCA 903799005.1 | N/A |
| PDT00072756.2 | SAMEA4008495 | SAMEA4008495 | ERR1723875 | GCA 903798995.1 | N/A |
| PDT00072757.2 | SAMEA4008496 | SAMEA4008496 | ERR1723876 | GCA 903799025.1 | N/A |
| PDT00072758.2 | SAMEA4008497 | SAMEA4008497 | ERR1723877 | GCA 903799075.1 | N/A |
| PDT00072760.2 | SAMEA4008499 | SAMEA4008499 | ERR1723879 | GCA 903799085.1 | N/A |
| PDT00072763.2 | SAMEA4008502 | SAMEA4008502 | ERR1723882 | GCA 903799035.1 | N/A |
| PDT00072764.2 | SAMEA4008503 | SAMEA4008503 | ERR1723883 | GCA 903799095.1 | N/A |
| PDT00072765.2 | SAMEA4008504 | SAMEA4008504 | ERR1723884 | GCA 903799125.1 | N/A |
| PDT00072766.2 | SAMEA4008506 | SAMEA4008506 | ERR1723885 | GCA 903799135.1 | N/A |
| PDT00072767.2 | SAMEA4008507 | SAMEA4008507 | ERR1723886 | GCA 903799115.1 | N/A |
| PDT00072769.2 | SAMEA4008509 | SAMEA4008509 | ERR1723888 | GCA 903799145.1 | N/A |
| PDT00072770.2 | SAMEA4008510 | SAMEA4008510 | ERR1723889 | GCA 903799195.1 | N/A |
| PDT00072772.2 | SAMEA4008512 | SAMEA4008512 | ERR1723891 | GCA 903799185.1 | N/A |
| PDT00072773.2 | SAMEA4008514 | SAMEA4008514 | ERR1723892 | GCA 903799155.1 | N/A |
| PDT00072774.2 | SAMEA4008515 | SAMEA4008515 | ERR1723893 | GCA 903799175.1 | N/A |
| PDT00072776.2 | SAMEA4008517 | SAMEA4008517 | ERR1723895 | GCA 903799215.1 | N/A |
| PDT00072777.2 | SAMEA4008518 | SAMEA4008518 | ERR1723896 | GCA 903799245.1 | N/A |
| PDT00072778.2 | SAMEA4008519 | SAMEA4008519 | ERR1723897 | GCA 903799255.1 | N/A |
| PDT00072779.2 | SAMEA4008520 | SAMEA4008520 | ERR1723898 | GCA 903799225.1 | N/A |
| PDT00072780.2 | SAMEA4008522 | SAMEA4008522 | ERR1723899 | GCA 903799235.1 | N/A |
| PDT00072781.2 | SAMEA4008523 | SAMEA4008523 | ERR1723900 | GCA 903799295.1 | N/A |
| PDT00072782.2 | SAMEA4008524 | SAMEA4008524 | ERR1723901 | GCA 903799265.1 | N/A |
| PDT00072785.2 | SAMEA4008527 | SAMEA4008527 | ERR1723904 | GCA 903799305.1 | N/A |
| PDT00072788.2 | SAMEA4008530 | SAMEA4008530 | ERR1723907 | GCA 903799375.1 | N/A |
| PDT00072789.2 | SAMEA4008531 | SAMEA4008531 | ERR1723908 | GCA 903799385.1 | N/A |
| PDT00072792.2 | SAMEA4008534 | SAMEA4008534 | ERR1723911 | GCA 903799335.1 | N/A |
| PDT00072794.2 | SAMEA4008536 | SAMEA4008536 | ERR1723913 | GCA 903799395.1 | N/A |
| PDT00072795.2 | SAMEA4008537 | SAMEA4008537 | ERR1723914 | GCA 903799415.1 | N/A |
| PDT00072798.2 | SAMEA4008540 | SAMEA4008540 | ERR1723917 | GCA 903799405.1 | N/A |
| PDT00072800.2 | SAMEA4008542 | SAMEA4008542 | ERR1723919 | GCA 903799445.1 | N/A |
| PDT00072801.2 | SAMEA4008543 | SAMEA4008543 | ERR1723920 | GCA 903799465.1 | N/A |
| PDT00072805.2 | SAMEA4008547 | SAMEA4008547 | ERR1723924 | GCA 903799495.1 | N/A |
| PDT00072806.2 | SAMEA4008548 | SAMEA4008548 | ERR1723925 | GCA 903799475.1 | N/A |
| PDT00072808.2 | SAMEA4008550 | SAMEA4008550 | ERR1723927 | GCA 903799545.1 | N/A |
| PDT00072812.2 | SAMEA4008554 | SAMEA4008554 | ERR1723931 | GCA 903799605.1 | N/A |
| PDT00072813.2 | SAMEA4008555 | SAMEA4008555 | ERR1723932 | GCA 903799565.1 | N/A |
| PDT00072814.2 | SAMEA4008556 | SAMEA4008556 | ERR1723933 | GCA 903799575.1 | N/A |
| PDT00072815.2 | SAMEA4008557 | SAMEA4008557 | ERR1723934 | GCA 903799615.1 | N/A |
| PDT00072816.2 | SAMEA4008558 | SAMEA4008558 | ERR1723935 | GCA 903799585.1 | N/A |



|                |              |              |            |                 |     |
|----------------|--------------|--------------|------------|-----------------|-----|
| PDT000772820.2 | SAMEA4008562 | SAMEA4008562 | ERR1723939 | GCA 903799635.1 | N/A |
| PDT000772825.2 | SAMEA4008567 | SAMEA4008567 | ERR1723944 | GCA 903799725.1 | N/A |
| PDT000772826.2 | SAMEA4008568 | SAMEA4008568 | ERR1723945 | GCA 903799735.1 | N/A |
| PDT000772829.2 | SAMEA4008571 | SAMEA4008571 | ERR1723948 | GCA 903799745.1 | N/A |
| PDT000772832.2 | SAMEA4008574 | SAMEA4008574 | ERR1723951 | GCA 903799755.1 | N/A |
| PDT000772834.2 | SAMEA4008576 | SAMEA4008576 | ERR1723953 | GCA 903799795.1 | N/A |
| PDT000772835.2 | SAMEA4008577 | SAMEA4008577 | ERR1723954 | GCA 903799815.1 | N/A |
| PDT000772838.2 | SAMEA4008580 | SAMEA4008580 | ERR1723957 | GCA 903799835.1 | N/A |
| PDT000772842.2 | SAMEA4008584 | SAMEA4008584 | ERR1723961 | GCA 903799865.1 | N/A |
| PDT000772846.2 | SAMEA4008588 | SAMEA4008588 | ERR1723965 | GCA 903799915.1 | N/A |
| PDT000772850.2 | SAMEA4008592 | SAMEA4008592 | ERR1723969 | GCA 903799965.1 | N/A |
| PDT000772853.2 | SAMEA4008595 | SAMEA4008595 | ERR1723972 | GCA 903800005.1 | N/A |
| PDT000772854.2 | SAMEA4008597 | SAMEA4008597 | ERR1723974 | GCA 903799995.1 | N/A |
| PDT000772855.2 | SAMEA4008598 | SAMEA4008598 | ERR1723975 | GCA 903800015.1 | N/A |
| PDT000772856.2 | SAMEA4008599 | SAMEA4008599 | ERR1723976 | GCA 903800025.1 | N/A |
| PDT000772857.2 | SAMEA4008600 | SAMEA4008600 | ERR1723977 | GCA 903800035.1 | N/A |
| PDT000772859.2 | SAMEA4008602 | SAMEA4008602 | ERR1723979 | GCA 903800055.1 | N/A |
| PDT000772860.2 | SAMEA4008603 | SAMEA4008603 | ERR1723980 | GCA 903800065.1 | N/A |
| PDT000772861.2 | SAMEA4008604 | SAMEA4008604 | ERR1723981 | GCA 903800075.1 | N/A |
| PDT000772867.2 | SAMEA4008611 | SAMEA4008611 | ERR1723987 | GCA 903800135.1 | N/A |
| PDT000772870.2 | SAMEA4008616 | SAMEA4008616 | ERR1723991 | GCA 903800175.1 | N/A |
| PDT000772871.2 | SAMEA4008617 | SAMEA4008617 | ERR1723992 | GCA 903800165.1 | N/A |
| PDT000772874.2 | SAMEA4008620 | SAMEA4008620 | ERR1723995 | GCA 903800205.1 | N/A |
| PDT000782257.2 | SAMEA4008622 | SAMEA4008622 | ERR1723997 | GCA 903800225.1 | N/A |
| PDT000782261.2 | SAMEA4008626 | SAMEA4008626 | ERR1715329 | GCA 903800255.1 | N/A |
| PDT000782262.2 | SAMEA4008627 | SAMEA4008627 | ERR1715330 | GCA 903800305.1 | N/A |
| PDT000782268.2 | SAMEA4008633 | SAMEA4008633 | ERR1715336 | GCA 903800335.1 | N/A |
| PDT000782269.2 | SAMEA4008634 | SAMEA4008634 | ERR1715337 | GCA 903800355.1 | N/A |
| PDT000782270.2 | SAMEA4008635 | SAMEA4008635 | ERR1715338 | GCA 903800345.1 | N/A |
| PDT000782271.2 | SAMEA4008636 | SAMEA4008636 | ERR1715339 | GCA 903800365.1 | N/A |
| PDT000782272.2 | SAMEA4008637 | SAMEA4008637 | ERR1715340 | GCA 903800375.1 | N/A |
| PDT000782273.2 | SAMEA4008638 | SAMEA4008638 | ERR1715341 | GCA 903800385.1 | N/A |
| PDT000782274.2 | SAMEA4008639 | SAMEA4008639 | ERR1715342 | GCA 903800395.1 | N/A |
| PDT000782276.2 | SAMEA4008641 | SAMEA4008641 | ERR1715344 | GCA 903800415.1 | N/A |
| PDT000782277.2 | SAMEA4008642 | SAMEA4008642 | ERR1715345 | GCA 903800425.1 | N/A |
| PDT000782279.2 | SAMEA4008644 | SAMEA4008644 | ERR1715347 | GCA 903800435.1 | N/A |
| PDT000782280.2 | SAMEA4008645 | SAMEA4008645 | ERR1715348 | GCA 903800445.1 | N/A |
| PDT000782281.2 | SAMEA4008646 | SAMEA4008646 | ERR1715349 | GCA 903800465.1 | N/A |
| PDT000782282.2 | SAMEA4008647 | SAMEA4008647 | ERR1715350 | GCA 903800475.1 | N/A |
| PDT000782283.2 | SAMEA4008648 | SAMEA4008648 | ERR1715351 | GCA 903800485.1 | N/A |
| PDT000782284.2 | SAMEA4008649 | SAMEA4008649 | ERR1715352 | GCA 903800495.1 | N/A |
| PDT000782285.2 | SAMEA4008650 | SAMEA4008650 | ERR1715353 | GCA 903800515.1 | N/A |
| PDT000782286.2 | SAMEA4008651 | SAMEA4008651 | ERR1715354 | GCA 903800505.1 | N/A |
| PDT000782287.2 | SAMEA4008652 | SAMEA4008652 | ERR1715355 | GCA 903800525.1 | N/A |
| PDT000782288.2 | SAMEA4008653 | SAMEA4008653 | ERR1715356 | GCA 903800535.1 | N/A |
| PDT000782291.2 | SAMEA4008656 | SAMEA4008656 | ERR1715359 | GCA 903800555.1 | N/A |
| PDT000782292.2 | SAMEA4008657 | SAMEA4008657 | ERR1715360 | GCA 903800575.1 | N/A |
| PDT000782293.2 | SAMEA4008658 | SAMEA4008658 | ERR1715361 | GCA 903800585.1 | N/A |
| PDT000782299.2 | SAMEA4008664 | SAMEA4008664 | ERR1715367 | GCA 903800645.1 | N/A |
| PDT000782300.2 | SAMEA4008665 | SAMEA4008665 | ERR1715368 | GCA 903800655.1 | N/A |
| PDT000782301.2 | SAMEA4008666 | SAMEA4008666 | ERR1715369 | GCA 903800665.1 | N/A |
| PDT000782302.2 | SAMEA4008667 | SAMEA4008667 | ERR1715370 | GCA 903800685.1 | N/A |
| PDT000782303.2 | SAMEA4008668 | SAMEA4008668 | ERR1715371 | GCA 903800695.1 | N/A |
| PDT000782304.2 | SAMEA4008670 | SAMEA4008670 | ERR1715372 | GCA 903800715.1 | N/A |
| PDT000782305.2 | SAMEA4008671 | SAMEA4008671 | ERR1715373 | GCA 903800705.1 | N/A |
| PDT000782306.2 | SAMEA4008672 | SAMEA4008672 | ERR1715374 | GCA 903800745.1 | N/A |
| PDT000790218.2 | SAMEA4008674 | SAMEA4008674 | ERR1715376 | GCA 903800755.1 | N/A |
| PDT000790219.2 | SAMEA4008675 | SAMEA4008675 | ERR1715377 | GCA 903800765.1 | N/A |
| PDT000790221.2 | SAMEA4008677 | SAMEA4008677 | ERR1715379 | GCA 903800795.1 | N/A |
| PDT000790228.2 | SAMEA4008684 | SAMEA4008684 | ERR1715386 | GCA 903800935.1 | N/A |
| PDT000790230.2 | SAMEA4008686 | SAMEA4008686 | ERR1715388 | GCA 903800975.1 | N/A |
| PDT000790232.2 | SAMEA4008688 | SAMEA4008688 | ERR1715390 | GCA 903801055.1 | N/A |
| PDT000790233.2 | SAMEA4008689 | SAMEA4008689 | ERR1715391 | GCA 903801065.1 | N/A |
| PDT000790234.2 | SAMEA4008690 | SAMEA4008690 | ERR1715392 | GCA 903801085.1 | N/A |
| PDT000790235.2 | SAMEA4008691 | SAMEA4008691 | ERR1715393 | GCA 903801115.1 | N/A |
| PDT000790236.2 | SAMEA4008692 | SAMEA4008692 | ERR1715394 | GCA 903801145.1 | N/A |
| PDT000790241.2 | SAMEA4008696 | SAMEA4008696 | ERR1715398 | GCA 903801225.1 | N/A |
| PDT000790243.2 | SAMEA4008698 | SAMEA4008698 | ERR1715400 | GCA 903801235.1 | N/A |

|                |              |              |            |                 |     |
|----------------|--------------|--------------|------------|-----------------|-----|
| PDT000790244.2 | SAMEA4008699 | SAMEA4008699 | ERR1715401 | GCA 903801255.1 | N/A |
| PDT000790247.2 | SAMEA4008701 | SAMEA4008701 | ERR1715403 | GCA 903801265.1 | N/A |
| PDT000790248.2 | SAMEA4008702 | SAMEA4008702 | ERR1715404 | GCA 903801285.1 | N/A |
| PDT000790250.2 | SAMEA4008704 | SAMEA4008704 | ERR1715406 | GCA 903801335.1 | N/A |
| PDT000790251.2 | SAMEA4008705 | SAMEA4008705 | ERR1715407 | GCA 903801355.1 | N/A |
| PDT000790253.2 | SAMEA4008706 | SAMEA4008706 | ERR1715408 | GCA 903801445.1 | N/A |
| PDT000790255.2 | SAMEA4008708 | SAMEA4008708 | ERR1715410 | GCA 903801505.1 | N/A |
| PDT000790256.2 | SAMEA4008709 | SAMEA4008709 | ERR1715411 | GCA 903801575.1 | N/A |
| PDT000790257.2 | SAMEA4008710 | SAMEA4008710 | ERR1715412 | GCA 903801615.1 | N/A |
| PDT000790258.2 | SAMEA4008711 | SAMEA4008711 | ERR1715413 | GCA 903801655.1 | N/A |
| PDT000790259.2 | SAMEA4008712 | SAMEA4008712 | ERR1715414 | GCA 903801685.1 | N/A |
| PDT000790260.2 | SAMEA4008713 | SAMEA4008713 | ERR1715415 | GCA 903801705.1 | N/A |
| PDT000790265.2 | SAMEA4008718 | SAMEA4008718 | ERR1715420 | GCA 903801935.1 | N/A |
| PDT000790267.2 | SAMEA4008720 | SAMEA4008720 | ERR1715422 | GCA 903802105.1 | N/A |
| PDT000790268.2 | SAMEA4008721 | SAMEA4008721 | ERR1715423 | GCA 903803025.1 | N/A |
| PDT000790270.2 | SAMEA4008723 | SAMEA4008723 | ERR1715425 | GCA 903803035.1 | N/A |
| PDT000790280.2 | SAMEA4008733 | SAMEA4008733 | ERR1715435 | GCA 903803155.1 | N/A |
| PDT000790283.2 | SAMEA4008736 | SAMEA4008736 | ERR1715438 | GCA 903803135.1 | N/A |
| PDT000790284.2 | SAMEA4008737 | SAMEA4008737 | ERR1715439 | GCA 903803175.1 | N/A |
| PDT000790289.2 | SAMEA4008743 | SAMEA4008743 | ERR1715444 | GCA 903803225.1 | N/A |
| PDT000790290.2 | SAMEA4008744 | SAMEA4008744 | ERR1715445 | GCA 903803235.1 | N/A |
| PDT000790292.2 | SAMEA4008746 | SAMEA4008746 | ERR1715447 | GCA 903803255.1 | N/A |
| PDT000790293.2 | SAMEA4008747 | SAMEA4008747 | ERR1715448 | GCA 903803265.1 | N/A |
| PDT000790296.2 | SAMEA4008750 | SAMEA4008750 | ERR1715451 | GCA 903803295.1 | N/A |
| PDT000790297.2 | SAMEA4008751 | SAMEA4008751 | ERR1715452 | GCA 903803305.1 | N/A |
| PDT000790298.2 | SAMEA4008752 | SAMEA4008752 | ERR1715453 | GCA 903803315.1 | N/A |
| PDT000790302.2 | SAMEA4008756 | SAMEA4008756 | ERR1715457 | GCA 903803355.1 | N/A |
| PDT000790307.2 | SAMEA4008761 | SAMEA4008761 | ERR1715462 | GCA 903803405.1 | N/A |
| PDT000790309.2 | SAMEA4008763 | SAMEA4008763 | ERR1715464 | GCA 903803445.1 | N/A |
| PDT000790310.2 | SAMEA4008764 | SAMEA4008764 | ERR1715465 | GCA 903803425.1 | N/A |
| PDT000790313.2 | SAMEA4008769 | SAMEA4008769 | ERR1715469 | GCA 903803465.1 | N/A |
| PDT000790321.2 | SAMEA4008777 | SAMEA4008777 | ERR1715477 | GCA 903803545.1 | N/A |
| PDT000790322.2 | SAMEA4008778 | SAMEA4008778 | ERR1715478 | GCA 903803555.1 | N/A |
| PDT000790324.2 | SAMEA4008780 | SAMEA4008780 | ERR1715480 | GCA 903803575.1 | N/A |
| PDT000790325.2 | SAMEA4008781 | SAMEA4008781 | ERR1715481 | GCA 903803585.1 | N/A |
| PDT000790326.2 | SAMEA4008782 | SAMEA4008782 | ERR1715482 | GCA 903803595.1 | N/A |
| PDT000790327.2 | SAMEA4008783 | SAMEA4008783 | ERR1715483 | GCA 903803605.1 | N/A |
| PDT000790328.2 | SAMEA4008784 | SAMEA4008784 | ERR1715484 | GCA 903803615.1 | N/A |
| PDT000790329.2 | SAMEA4008785 | SAMEA4008785 | ERR1715485 | GCA 903803625.1 | N/A |
| PDT000790330.2 | SAMEA4008786 | SAMEA4008786 | ERR1715486 | GCA 903803635.1 | N/A |
| PDT000790331.2 | SAMEA4008787 | SAMEA4008787 | ERR1715487 | GCA 903803655.1 | N/A |
| PDT000790332.2 | SAMEA4008788 | SAMEA4008788 | ERR1715488 | GCA 903803645.1 | N/A |
| PDT000790334.2 | SAMEA4008790 | SAMEA4008790 | ERR1715490 | GCA 903803675.1 | N/A |
| PDT000790335.2 | SAMEA4008791 | SAMEA4008791 | ERR1715491 | GCA 903803685.1 | N/A |
| PDT000790336.2 | SAMEA4008792 | SAMEA4008792 | ERR1715492 | GCA 903803695.1 | N/A |
| PDT000790337.2 | SAMEA4008793 | SAMEA4008793 | ERR1715493 | GCA 903803705.1 | N/A |
| PDT000790338.2 | SAMEA4008794 | SAMEA4008794 | ERR1715494 | GCA 903803725.1 | N/A |
| PDT000790339.2 | SAMEA4008795 | SAMEA4008795 | ERR1715495 | GCA 903803715.1 | N/A |
| PDT000790340.2 | SAMEA4008796 | SAMEA4008796 | ERR1715496 | GCA 903803735.1 | N/A |
| PDT000790346.2 | SAMEA4008802 | SAMEA4008802 | ERR1715502 | GCA 903803795.1 | N/A |
| PDT000790351.2 | SAMEA4008808 | SAMEA4008808 | ERR1715507 | GCA 903803835.1 | N/A |
| PDT000790352.2 | SAMEA4008809 | SAMEA4008809 | ERR1715508 | GCA 903803855.1 | N/A |
| PDT000790355.2 | SAMEA4008813 | SAMEA4008813 | ERR1715512 | GCA 903803905.1 | N/A |
| PDT000790356.2 | SAMEA4008814 | SAMEA4008814 | ERR1715513 | GCA 903803895.1 | N/A |
| PDT000790358.2 | SAMEA4552931 | SAMEA4552931 | ERR3012661 | GCA 903803925.1 | N/A |
| PDT000790359.2 | SAMEA4552932 | SAMEA4552932 | ERR3012662 | GCA 903803935.1 | N/A |
| PDT000790361.2 | SAMEA4552934 | SAMEA4552934 | ERR3012664 | GCA 903803945.1 | N/A |
| PDT000790363.2 | SAMEA4552936 | SAMEA4552936 | ERR3012666 | GCA 903803985.1 | N/A |
| PDT000790365.2 | SAMEA4552939 | SAMEA4552939 | ERR3012668 | GCA 903803995.1 | N/A |
| PDT000790367.2 | SAMEA4552942 | SAMEA4552942 | ERR3012670 | GCA 903804015.1 | N/A |
| PDT000790370.2 | SAMEA4552945 | SAMEA4552945 | ERR3012673 | GCA 903804035.1 | N/A |
| PDT000790371.2 | SAMEA4552947 | SAMEA4552947 | ERR3012674 | GCA 903804055.1 | N/A |
| PDT000790374.2 | SAMEA4552950 | SAMEA4552950 | ERR3012677 | GCA 903804085.1 | N/A |
| PDT000790378.2 | SAMEA4552954 | SAMEA4552954 | ERR3012681 | GCA 903804125.1 | N/A |
| PDT000790380.2 | SAMEA4552956 | SAMEA4552956 | ERR3012683 | GCA 903804145.1 | N/A |
| PDT000790382.2 | SAMEA4552959 | SAMEA4552959 | ERR3012685 | GCA 903804165.1 | N/A |
| PDT000790390.2 | SAMEA4552965 | SAMEA4552965 | ERR3012691 | GCA 903804245.1 | N/A |
| PDT000790391.2 | SAMEA4552967 | SAMEA4552967 | ERR3012693 | GCA 903804235.1 | N/A |

|                |              |              |            |                 |     |
|----------------|--------------|--------------|------------|-----------------|-----|
| PDT000790401.2 | SAMEA4552969 | SAMEA4552969 | ERR3012695 | GCA 903804265.1 | N/A |
| PDT000790409.2 | SAMEA4552973 | SAMEA4552973 | ERR3012699 | GCA 903804305.1 | N/A |
| PDT000790410.2 | SAMEA4552974 | SAMEA4552974 | ERR3012700 | GCA 903804325.1 | N/A |
| PDT000790411.2 | SAMEA4552975 | SAMEA4552975 | ERR3012701 | GCA 903804315.1 | N/A |
| PDT000790417.2 | SAMEA4552978 | SAMEA4552978 | ERR3012704 | GCA 903804355.1 | N/A |
| PDT000790432.2 | SAMEA4552982 | SAMEA4552982 | ERR3012708 | GCA 903804385.1 | N/A |
| PDT000790438.2 | SAMEA4552983 | SAMEA4552983 | ERR3012709 | GCA 903804405.1 | N/A |
| PDT000790443.2 | SAMEA4552984 | SAMEA4552984 | ERR3012710 | GCA 903804415.1 | N/A |
| PDT000790471.2 | SAMEA4552991 | SAMEA4552991 | ERR3012717 | GCA 903804485.1 | N/A |
| PDT000790476.2 | SAMEA4552992 | SAMEA4552992 | ERR3012718 | GCA 903804495.1 | N/A |
| PDT000790480.2 | SAMEA4552993 | SAMEA4552993 | ERR3012719 | GCA 903804515.1 | N/A |
| PDT000790489.2 | SAMEA4552995 | SAMEA4552995 | ERR3012721 | GCA 903804535.1 | N/A |
| PDT000790502.2 | SAMEA4552998 | SAMEA4552998 | ERR3012724 | GCA 903804555.1 | N/A |
| PDT000790507.2 | SAMEA4552999 | SAMEA4552999 | ERR3012725 | GCA 903804565.1 | N/A |
| PDT000790509.2 | SAMEA4553000 | SAMEA4553000 | ERR3012726 | GCA 903804575.1 | N/A |
| PDT000790517.2 | SAMEA4553002 | SAMEA4553002 | ERR3012728 | GCA 903804595.1 | N/A |
| PDT000790522.2 | SAMEA4553003 | SAMEA4553003 | ERR3012729 | GCA 903804605.1 | N/A |
| PDT000790524.2 | SAMEA4553004 | SAMEA4553004 | ERR3012730 | GCA 903804615.1 | N/A |
| PDT000790529.2 | SAMEA4553005 | SAMEA4553005 | ERR3012731 | GCA 903804625.1 | N/A |
| PDT000790531.2 | SAMEA4553006 | SAMEA4553006 | ERR3012732 | GCA 903804635.1 | N/A |
| PDT000790537.2 | SAMEA4553007 | SAMEA4553007 | ERR3012733 | GCA 903804645.1 | N/A |
| PDT000790542.2 | SAMEA4553008 | SAMEA4553008 | ERR3012734 | GCA 903804655.1 | N/A |
| PDT000790552.2 | SAMEA4553011 | SAMEA4553011 | ERR3012737 | GCA 903804685.1 | N/A |
| PDT000790569.2 | SAMEA4553016 | SAMEA4553016 | ERR3012742 | GCA 903804735.1 | N/A |
| PDT000790571.2 | SAMEA4553018 | SAMEA4553018 | ERR3012744 | GCA 903804755.1 | N/A |
| PDT000790572.2 | SAMEA4553019 | SAMEA4553019 | ERR3012745 | GCA 903804765.1 | N/A |
| PDT000790573.2 | SAMEA4553020 | SAMEA4553020 | ERR3012746 | GCA 903804775.1 | N/A |
| PDT000790576.2 | SAMEA4553023 | SAMEA4553023 | ERR3012749 | GCA 903804805.1 | N/A |
| PDT000790578.2 | SAMEA4553025 | SAMEA4553025 | ERR1891757 | GCA 903804825.1 | N/A |
| PDT000790579.2 | SAMEA4553026 | SAMEA4553026 | ERR1891758 | GCA 903804835.1 | N/A |
| PDT000790583.2 | SAMEA4553030 | SAMEA4553030 | ERR1891762 | GCA 903804885.1 | N/A |
| PDT000790584.2 | SAMEA4553031 | SAMEA4553031 | ERR1891763 | GCA 903804875.1 | N/A |
| PDT000790586.2 | SAMEA4553033 | SAMEA4553033 | ERR1891765 | GCA 903804905.1 | N/A |
| PDT000790587.2 | SAMEA4553034 | SAMEA4553034 | ERR1891766 | GCA 903804925.1 | N/A |
| PDT000790589.2 | SAMEA4553036 | SAMEA4553036 | ERR1891768 | GCA 903804935.1 | N/A |
| PDT000790590.2 | SAMEA4553037 | SAMEA4553037 | ERR1891769 | GCA 903804955.1 | N/A |
| PDT000790591.2 | SAMEA4553038 | SAMEA4553038 | ERR1891770 | GCA 903804945.1 | N/A |
| PDT000790592.2 | SAMEA4553039 | SAMEA4553039 | ERR1891771 | GCA 903804965.1 | N/A |
| PDT000790593.2 | SAMEA4553040 | SAMEA4553040 | ERR1891772 | GCA 903804975.1 | N/A |
| PDT000790594.2 | SAMEA4553041 | SAMEA4553041 | ERR1891773 | GCA 903804985.1 | N/A |
| PDT000790595.2 | SAMEA4553043 | SAMEA4553043 | ERR1891774 | GCA 903804995.1 | N/A |
| PDT000790596.2 | SAMEA4553044 | SAMEA4553044 | ERR1891775 | GCA 903805005.1 | N/A |
| PDT000790597.2 | SAMEA4553045 | SAMEA4553045 | ERR1891776 | GCA 903805025.1 | N/A |
| PDT000790598.2 | SAMEA4553046 | SAMEA4553046 | ERR1891777 | GCA 903805015.1 | N/A |
| PDT000790599.2 | SAMEA4553047 | SAMEA4553047 | ERR1891778 | GCA 903805035.1 | N/A |
| PDT000790600.2 | SAMEA4553048 | SAMEA4553048 | ERR1891779 | GCA 903805045.1 | N/A |
| PDT000790601.2 | SAMEA4553049 | SAMEA4553049 | ERR1891780 | GCA 903805065.1 | N/A |
| PDT000790602.2 | SAMEA4553050 | SAMEA4553050 | ERR1891781 | GCA 903805055.1 | N/A |
| PDT000790603.2 | SAMEA4553051 | SAMEA4553051 | ERR1891782 | GCA 903805085.1 | N/A |
| PDT000790604.2 | SAMEA4553052 | SAMEA4553052 | ERR1891783 | GCA 903805075.1 | N/A |
| PDT000790605.2 | SAMEA4553054 | SAMEA4553054 | ERR1891785 | GCA 903805105.1 | N/A |
| PDT000790606.2 | SAMEA4553055 | SAMEA4553055 | ERR1891786 | GCA 903805115.1 | N/A |
| PDT000790607.2 | SAMEA4553056 | SAMEA4553056 | ERR1891787 | GCA 903805125.1 | N/A |
| PDT000790608.2 | SAMEA4553057 | SAMEA4553057 | ERR1891788 | GCA 903805135.1 | N/A |
| PDT000790612.2 | SAMEA4553061 | SAMEA4553061 | ERR1891792 | GCA 903805175.1 | N/A |
| PDT000790613.2 | SAMEA4553062 | SAMEA4553062 | ERR1891793 | GCA 903805185.1 | N/A |
| PDT000790615.2 | SAMEA4553064 | SAMEA4553064 | ERR1891795 | GCA 903805205.1 | N/A |
| PDT000790616.2 | SAMEA4553065 | SAMEA4553065 | ERR1891796 | GCA 903805215.1 | N/A |
| PDT000790617.2 | SAMEA4553066 | SAMEA4553066 | ERR1891797 | GCA 903805225.1 | N/A |
| PDT000790618.2 | SAMEA4553067 | SAMEA4553067 | ERR1891798 | GCA 903805235.1 | N/A |
| PDT000790619.2 | SAMEA4553068 | SAMEA4553068 | ERR1891799 | GCA 903805245.1 | N/A |
| PDT000790621.2 | SAMEA4553070 | SAMEA4553070 | ERR1891801 | GCA 903805275.1 | N/A |
| PDT000790623.2 | SAMEA4553072 | SAMEA4553072 | ERR1891803 | GCA 903805285.1 | N/A |
| PDT000790632.2 | SAMEA4553081 | SAMEA4553081 | ERR1891812 | GCA 903805375.1 | N/A |
| PDT000790635.2 | SAMEA4553084 | SAMEA4553084 | ERR1891815 | GCA 903805405.1 | N/A |
| PDT000790636.2 | SAMEA4553085 | SAMEA4553085 | ERR1891816 | GCA 903805415.1 | N/A |
| PDT000790637.2 | SAMEA4553086 | SAMEA4553086 | ERR1891817 | GCA 903805425.1 | N/A |
| PDT000790638.2 | SAMEA4553087 | SAMEA4553087 | ERR1891818 | GCA 903805435.1 | N/A |

|                |               |               |            |                 |     |
|----------------|---------------|---------------|------------|-----------------|-----|
| PDT000790639.2 | SAMEA4553088  | SAMEA4553088  | ERR1891819 | GCA 903805455.1 | N/A |
| PDT000790640.2 | SAMEA4553089  | SAMEA4553089  | ERR1891820 | GCA 903805445.1 | N/A |
| PDT000790641.2 | SAMEA4553090  | SAMEA4553090  | ERR1891821 | GCA 903805465.1 | N/A |
| PDT000790642.2 | SAMEA4553091  | SAMEA4553091  | ERR1891822 | GCA 903805475.1 | N/A |
| PDT000790643.2 | SAMEA4553092  | SAMEA4553092  | ERR1891823 | GCA 903805485.1 | N/A |
| PDT000790644.2 | SAMEA4553093  | SAMEA4553093  | ERR1891824 | GCA 903805505.1 | N/A |
| PDT000790645.2 | SAMEA4553094  | SAMEA4553094  | ERR1891825 | GCA 903805495.1 | N/A |
| PDT000790654.2 | SAMEA4553104  | SAMEA4553104  | ERR1891835 | GCA 903805585.1 | N/A |
| PDT000790659.2 | SAMEA4553109  | SAMEA4553109  | ERR1891840 | GCA 903805645.1 | N/A |
| PDT000790660.2 | SAMEA4553110  | SAMEA4553110  | ERR1891841 | GCA 903805655.1 | N/A |
| PDT000790662.2 | SAMEA4553112  | SAMEA4553112  | ERR1891843 | GCA 903805675.1 | N/A |
| PDT000790733.2 | SAMEA4553138  | SAMEA4553138  | ERR1891867 | GCA 903805895.1 | N/A |
| PDT000790742.2 | SAMEA4553141  | SAMEA4553141  | ERR1891870 | GCA 903805925.1 | N/A |
| PDT000790790.2 | SAMEA4553156  | SAMEA4553156  | ERR1891885 | GCA 903806055.1 | N/A |
| PDT000790805.2 | SAMEA4553160  | SAMEA4553160  | ERR1891889 | GCA 903806095.1 | N/A |
| PDT000790808.2 | SAMEA4553161  | SAMEA4553161  | ERR1891890 | GCA 903806105.1 | N/A |
| PDT000790820.2 | SAMEA4553164  | SAMEA4553164  | ERR1891893 | GCA 903806135.1 | N/A |
| PDT000790835.2 | SAMEA4553169  | SAMEA4553169  | ERR1891897 | GCA 903806175.1 | N/A |
| PDT000790898.2 | SAMEA4553186  | SAMEA4553186  | ERR1891914 | GCA 903806345.1 | N/A |
| PDT000790905.2 | SAMEA4553193  | SAMEA4553193  | ERR1891921 | GCA 903806425.1 | N/A |
| PDT000790907.2 | SAMEA4553196  | SAMEA4553196  | ERR1891924 | GCA 903806465.1 | N/A |
| PDT000790910.2 | SAMEA4553199  | SAMEA4553199  | ERR1891927 | GCA 903806485.1 | N/A |
| PDT000790912.2 | SAMEA4553201  | SAMEA4553201  | ERR1891929 | GCA 903806505.1 | N/A |
| PDT000790913.2 | SAMEA4553202  | SAMEA4553202  | ERR1891930 | GCA 903806515.1 | N/A |
| PDT000790914.2 | SAMEA4553203  | SAMEA4553203  | ERR1891931 | GCA 903806525.1 | N/A |
| PDT000790920.2 | SAMEA4553209  | SAMEA4553209  | ERR1891937 | GCA 903806585.1 | N/A |
| PDT000790922.2 | SAMEA4553211  | SAMEA4553211  | ERR1891939 | GCA 903806615.1 | N/A |
| PDT000790923.2 | SAMEA4553212  | SAMEA4553212  | ERR1891940 | GCA 903806625.1 | N/A |
| PDT000790926.2 | SAMEA4553215  | SAMEA4553215  | ERR3012751 | GCA 903806645.1 | N/A |
| PDT000790927.2 | SAMEA4553216  | SAMEA4553216  | ERR3012752 | GCA 903806675.1 | N/A |
| PDT000790934.2 | SAMEA4553223  | SAMEA4553223  | ERR3012759 | GCA 903806735.1 | N/A |
| PDT000790940.2 | SAMEA4553229  | SAMEA4553229  | ERR3012765 | GCA 903806815.1 | N/A |
| PDT000790943.2 | SAMEA4553232  | SAMEA4553232  | ERR3012768 | GCA 903806825.1 | N/A |
| PDT000790945.2 | SAMEA4553234  | SAMEA4553234  | ERR3012770 | GCA 903806845.1 | N/A |
| PDT000790946.2 | SAMEA4553235  | SAMEA4553235  | ERR3012771 | GCA 903806865.1 | N/A |
| PDT000790947.2 | SAMEA4553236  | SAMEA4553236  | ERR3012772 | GCA 903806875.1 | N/A |
| PDT000790948.2 | SAMEA4553237  | SAMEA4553237  | ERR3012773 | GCA 903806885.1 | N/A |
| PDT000790949.2 | SAMEA4553238  | SAMEA4553238  | ERR3012774 | GCA 903806895.1 | N/A |
| PDT000790950.2 | SAMEA4553239  | SAMEA4553239  | ERR3012775 | GCA 903806905.1 | N/A |
| PDT000790960.2 | SAMEA4553249  | SAMEA4553249  | ERR3012785 | GCA 903807025.1 | N/A |
| PDT000790964.2 | SAMEA4553253  | SAMEA4553253  | ERR3012789 | GCA 903807065.1 | N/A |
| PDT000790966.2 | SAMEA4553255  | SAMEA4553255  | ERR3012791 | GCA 903807085.1 | N/A |
| PDT000790967.2 | SAMEA4553256  | SAMEA4553256  | ERR3012792 | GCA 903807095.1 | N/A |
| PDT000790969.2 | SAMEA4553258  | SAMEA4553258  | ERR3012794 | GCA 903807115.1 | N/A |
| PDT000790970.2 | SAMEA4553260  | SAMEA4553260  | ERR3012796 | GCA 903807125.1 | N/A |
| PDT000790974.2 | SAMEA4553264  | SAMEA4553264  | ERR3012800 | GCA 903807165.1 | N/A |
| PDT000790975.2 | SAMEA4553265  | SAMEA4553265  | ERR3012801 | GCA 903807175.1 | N/A |
| PDT000790977.2 | SAMEA4553267  | SAMEA4553267  | ERR3012803 | GCA 903807195.1 | N/A |
| PDT000790978.2 | SAMEA4553268  | SAMEA4553268  | ERR3012804 | GCA 903807205.1 | N/A |
| PDT000790981.2 | SAMEA4553271  | SAMEA4553271  | ERR3012807 | GCA 903807235.1 | N/A |
| PDT000790985.2 | SAMEA4553275  | SAMEA4553275  | ERR3012811 | GCA 903807275.1 | N/A |
| PDT000790995.2 | SAMEA4553285  | SAMEA4553285  | ERR3012821 | GCA 903807375.1 | N/A |
| PDT000790996.2 | SAMEA4553286  | SAMEA4553286  | ERR3012822 | GCA 903807385.1 | N/A |
| PDT000790997.2 | SAMEA4553287  | SAMEA4553287  | ERR3012823 | GCA 903807395.1 | N/A |
| PDT000790998.2 | SAMEA4553288  | SAMEA4553288  | ERR3012824 | GCA 903807405.1 | N/A |
| PDT000791001.2 | SAMEA4553291  | SAMEA4553291  | ERR3012827 | GCA 903807435.1 | N/A |
| PDT000791005.2 | SAMEA4553295  | SAMEA4553295  | ERR3012831 | GCA 903807475.1 | N/A |
| PDT000791010.2 | SAMEA4553300  | SAMEA4553300  | ERR3012836 | GCA 903807545.1 | N/A |
| PDT000791018.2 | SAMEA4553308  | SAMEA4553308  | ERR3012844 | GCA 903807585.1 | N/A |
| PDT000791025.2 | SAMEA70051168 | SAMEA70051168 | ERR2506323 | GCA 903807675.1 | N/A |
| PDT000791030.2 | SAMEA70054918 | SAMEA70054918 | ERR2506328 | GCA 903807715.1 | N/A |
| PDT000791036.2 | SAMEA70059418 | SAMEA70059418 | ERR2506334 | GCA 903807785.1 | N/A |
| PDT000791048.2 | SAMEA70068418 | SAMEA70068418 | ERR2506346 | GCA 903807925.1 | N/A |
| PDT000791050.2 | SAMEA70069918 | SAMEA70069918 | ERR2506348 | GCA 903807905.1 | N/A |
| PDT000791051.2 | SAMEA70070668 | SAMEA70070668 | ERR2506349 | GCA 903807965.1 | N/A |
| PDT000791052.2 | SAMEA70071418 | SAMEA70071418 | ERR2506350 | GCA 903807955.1 | N/A |
| PDT000791053.2 | SAMEA70072168 | SAMEA70072168 | ERR2506351 | GCA 903807935.1 | N/A |
| PDT000791054.2 | SAMEA70072918 | SAMEA70072918 | ERR2506352 | GCA 903807945.1 | N/A |

|                |               |               |            |                 |     |
|----------------|---------------|---------------|------------|-----------------|-----|
| PDT000791055.2 | SAMEA70073668 | SAMEA70073668 | ERR2506353 | GCA 903807985.1 | N/A |
| PDT000791056.2 | SAMEA70074418 | SAMEA70074418 | ERR2506354 | GCA 903807975.1 | N/A |
| PDT000791057.2 | SAMEA70075168 | SAMEA70075168 | ERR2506355 | GCA 903808015.1 | N/A |
| PDT000791058.2 | SAMEA70075918 | SAMEA70075918 | ERR2506356 | GCA 903808005.1 | N/A |
| PDT000791059.2 | SAMEA70076668 | SAMEA70076668 | ERR2506357 | GCA 903807995.1 | N/A |
| PDT000791060.2 | SAMEA70077418 | SAMEA70077418 | ERR2506358 | GCA 903808025.1 | N/A |
| PDT000791061.2 | SAMEA70078168 | SAMEA70078168 | ERR2506359 | GCA 903808035.1 | N/A |
| PDT000791062.2 | SAMEA70078918 | SAMEA70078918 | ERR2506360 | GCA 903808065.1 | N/A |
| PDT000791063.2 | SAMEA70079668 | SAMEA70079668 | ERR2506361 | GCA 903808055.1 | N/A |
| PDT000791065.2 | SAMEA70081168 | SAMEA70081168 | ERR2506363 | GCA 903808075.1 | N/A |
| PDT000791066.2 | SAMEA70081918 | SAMEA70081918 | ERR2506364 | GCA 903808085.1 | N/A |
| PDT000791067.2 | SAMEA70082668 | SAMEA70082668 | ERR2506365 | GCA 903808095.1 | N/A |
| PDT000791068.2 | SAMEA70083418 | SAMEA70083418 | ERR2506366 | GCA 903808125.1 | N/A |
| PDT000791070.2 | SAMEA70084918 | SAMEA70084918 | ERR2506368 | GCA 903808105.1 | N/A |
| PDT000791071.2 | SAMEA70085668 | SAMEA70085668 | ERR2506369 | GCA 903808115.1 | N/A |
| PDT000791072.2 | SAMEA70086418 | SAMEA70086418 | ERR2506370 | GCA 903808135.1 | N/A |
| PDT000791076.2 | SAMEA70089418 | SAMEA70089418 | ERR2506374 | GCA 903808185.1 | N/A |
| PDT000791078.2 | SAMEA70090918 | SAMEA70090918 | ERR2506376 | GCA 903808205.1 | N/A |
| PDT000791082.2 | SAMEA70093918 | SAMEA70093918 | ERR2506380 | GCA 903808245.1 | N/A |
| PDT000791083.2 | SAMEA70094668 | SAMEA70094668 | ERR2506381 | GCA 903808265.1 | N/A |
| PDT000791084.2 | SAMEA70096168 | SAMEA70096168 | ERR2506382 | GCA 903808255.1 | N/A |
| PDT000791085.2 | SAMEA70096918 | SAMEA70096918 | ERR2506383 | GCA 903808275.1 | N/A |
| PDT000791086.2 | SAMEA70097668 | SAMEA70097668 | ERR2506384 | GCA 903808285.1 | N/A |
| PDT000791087.2 | SAMEA70098418 | SAMEA70098418 | ERR2506385 | GCA 903808295.1 | N/A |
| PDT000791088.2 | SAMEA70099168 | SAMEA70099168 | ERR2506386 | GCA 903808305.1 | N/A |
| PDT000791089.2 | SAMEA70099918 | SAMEA70099918 | ERR2506387 | GCA 903808315.1 | N/A |
| PDT000791090.2 | SAMEA70100668 | SAMEA70100668 | ERR2506388 | GCA 903808335.1 | N/A |
| PDT000791091.2 | SAMEA70102168 | SAMEA70102168 | ERR2506389 | GCA 903808325.1 | N/A |
| PDT000791093.2 | SAMEA70103668 | SAMEA70103668 | ERR2506391 | GCA 903808365.1 | N/A |
| PDT000791094.2 | SAMEA70104418 | SAMEA70104418 | ERR2506392 | GCA 903808355.1 | N/A |
| PDT000791095.2 | SAMEA70105168 | SAMEA70105168 | ERR2506393 | GCA 903808375.1 | N/A |
| PDT000791096.2 | SAMEA70105918 | SAMEA70105918 | ERR2506394 | GCA 903808385.1 | N/A |
| PDT000791097.2 | SAMEA70106668 | SAMEA70106668 | ERR2506395 | GCA 903808395.1 | N/A |
| PDT000791098.2 | SAMEA70107418 | SAMEA70107418 | ERR2506396 | GCA 903808405.1 | N/A |
| PDT000791100.2 | SAMEA70108918 | SAMEA70108918 | ERR2506398 | GCA 903808425.1 | N/A |
| PDT000791101.2 | SAMEA70109668 | SAMEA70109668 | ERR2506399 | GCA 903808435.1 | N/A |
| PDT000791102.2 | SAMEA70110418 | SAMEA70110418 | ERR2506400 | GCA 903808445.1 | N/A |
| PDT000791103.2 | SAMEA70111168 | SAMEA70111168 | ERR2506401 | GCA 903808455.1 | N/A |
| PDT000791104.2 | SAMEA70111918 | SAMEA70111918 | ERR2506402 | GCA 903808465.1 | N/A |
| PDT000791105.2 | SAMEA70112668 | SAMEA70112668 | ERR2506403 | GCA 903808475.1 | N/A |
| PDT000791106.2 | SAMEA70113418 | SAMEA70113418 | ERR2506404 | GCA 903808485.1 | N/A |
| PDT000791107.2 | SAMEA70114168 | SAMEA70114168 | ERR2506405 | GCA 903808495.1 | N/A |
| PDT000791108.2 | SAMEA70114918 | SAMEA70114918 | ERR2506406 | GCA 903808505.1 | N/A |
| PDT000791109.2 | SAMEA70115668 | SAMEA70115668 | ERR2506407 | GCA 903808525.1 | N/A |
| PDT000791110.2 | SAMEA70116418 | SAMEA70116418 | ERR2506408 | GCA 903808515.1 | N/A |
| PDT000791111.2 | SAMEA70117168 | SAMEA70117168 | ERR2506409 | GCA 903808535.1 | N/A |
| PDT000791115.2 | SAMEA70120918 | SAMEA70120918 | ERR2506413 | GCA 903808575.1 | N/A |
| PDT000791116.2 | SAMEA70121668 | SAMEA70121668 | ERR2506414 | GCA 903808585.1 | N/A |
| PDT000791118.2 | SAMEA70123168 | SAMEA70123168 | ERR2506416 | GCA 903808605.1 | N/A |
| PDT000791119.2 | SAMEA70123918 | SAMEA70123918 | ERR2506417 | GCA 903808615.1 | N/A |
| PDT000791120.2 | SAMEA70124668 | SAMEA70124668 | ERR2506418 | GCA 903808625.1 | N/A |
| PDT000791122.2 | SAMEA70126168 | SAMEA70126168 | ERR2506420 | GCA 903808645.1 | N/A |
| PDT000791123.2 | SAMEA70126918 | SAMEA70126918 | ERR2506421 | GCA 903808655.1 | N/A |
| PDT000791125.2 | SAMEA70128418 | SAMEA70128418 | ERR2506423 | GCA 903808675.1 | N/A |
| PDT000791126.2 | SAMEA70129168 | SAMEA70129168 | ERR2506424 | GCA 903808685.1 | N/A |
| PDT000791127.2 | SAMEA70129918 | SAMEA70129918 | ERR2506425 | GCA 903808695.1 | N/A |
| PDT000791128.2 | SAMEA70130668 | SAMEA70130668 | ERR2506426 | GCA 903808705.1 | N/A |
| PDT000791129.2 | SAMEA70131418 | SAMEA70131418 | ERR2506427 | GCA 903808715.1 | N/A |
| PDT000791130.2 | SAMEA70132168 | SAMEA70132168 | ERR2506428 | GCA 903808725.1 | N/A |
| PDT000791131.2 | SAMEA70132918 | SAMEA70132918 | ERR2506429 | GCA 903808735.1 | N/A |
| PDT000791132.2 | SAMEA70133668 | SAMEA70133668 | ERR2506430 | GCA 903808745.1 | N/A |
| PDT000791134.2 | SAMEA70135168 | SAMEA70135168 | ERR2506432 | GCA 903808765.1 | N/A |
| PDT000791135.2 | SAMEA70135918 | SAMEA70135918 | ERR2506433 | GCA 903808775.1 | N/A |
| PDT000791136.2 | SAMEA70136668 | SAMEA70136668 | ERR2506434 | GCA 903808785.1 | N/A |
| PDT000791138.2 | SAMEA70138168 | SAMEA70138168 | ERR2506436 | GCA 903808805.1 | N/A |
| PDT000791139.2 | SAMEA70138918 | SAMEA70138918 | ERR2506437 | GCA 903808815.1 | N/A |
| PDT000791140.2 | SAMEA70139668 | SAMEA70139668 | ERR2506438 | GCA 903808825.1 | N/A |
| PDT000791141.2 | SAMEA70140418 | SAMEA70140418 | ERR2506439 | GCA 903808835.1 | N/A |

|                |               |               |            |                 |     |
|----------------|---------------|---------------|------------|-----------------|-----|
| PDT000791142.2 | SAMEA70141168 | SAMEA70141168 | ERR2506440 | GCA 903808845.1 | N/A |
| PDT000791143.2 | SAMEA70141918 | SAMEA70141918 | ERR2506441 | GCA 903808875.1 | N/A |
| PDT000791144.2 | SAMEA70142668 | SAMEA70142668 | ERR2506442 | GCA 903808855.1 | N/A |
| PDT000791145.2 | SAMEA70143418 | SAMEA70143418 | ERR2506443 | GCA 903808865.1 | N/A |
| PDT000791146.2 | SAMEA70144168 | SAMEA70144168 | ERR2506444 | GCA 903808885.1 | N/A |
| PDT000791147.2 | SAMEA70144918 | SAMEA70144918 | ERR2506445 | GCA 903808895.1 | N/A |
| PDT000791148.2 | SAMEA70145668 | SAMEA70145668 | ERR2506446 | GCA 903808915.1 | N/A |
| PDT000791149.2 | SAMEA70146418 | SAMEA70146418 | ERR2506447 | GCA 903808905.1 | N/A |
| PDT000791151.2 | SAMEA70147918 | SAMEA70147918 | ERR2506449 | GCA 903808935.1 | N/A |
| PDT000791152.2 | SAMEA70148668 | SAMEA70148668 | ERR2506450 | GCA 903808945.1 | N/A |
| PDT000791154.2 | SAMEA70150168 | SAMEA70150168 | ERR2506452 | GCA 903808965.1 | N/A |
| PDT000791156.2 | SAMEA70151668 | SAMEA70151668 | ERR2506454 | GCA 903808985.1 | N/A |
| PDT000791157.2 | SAMEA70152418 | SAMEA70152418 | ERR2506455 | GCA 903808995.1 | N/A |
| PDT000791158.2 | SAMEA70153168 | SAMEA70153168 | ERR2506456 | GCA 903809005.1 | N/A |
| PDT000791159.2 | SAMEA70153918 | SAMEA70153918 | ERR2506457 | GCA 903809015.1 | N/A |
| PDT000791160.2 | SAMEA70154668 | SAMEA70154668 | ERR2506458 | GCA 903809025.1 | N/A |
| PDT000791161.2 | SAMEA70155418 | SAMEA70155418 | ERR2506459 | GCA 903809035.1 | N/A |
| PDT000791162.2 | SAMEA70156168 | SAMEA70156168 | ERR2506460 | GCA 903809045.1 | N/A |
| PDT000791163.2 | SAMEA70156918 | SAMEA70156918 | ERR2506505 | GCA 903809495.1 | N/A |
| PDT000791164.2 | SAMEA70157668 | SAMEA70157668 | ERR2525215 | GCA 903809515.1 | N/A |
| PDT000791165.2 | SAMEA70158418 | SAMEA70158418 | ERR2506461 | GCA 903809055.1 | N/A |
| PDT000791166.2 | SAMEA70159168 | SAMEA70159168 | ERR2525216 | GCA 903809505.1 | N/A |
| PDT000791167.2 | SAMEA70159918 | SAMEA70159918 | ERR2506462 | GCA 903809065.1 | N/A |
| PDT000791168.2 | SAMEA70160668 | SAMEA70160668 | ERR2525217 | GCA 903809535.1 | N/A |
| PDT000791169.2 | SAMEA70161418 | SAMEA70161418 | ERR2506463 | GCA 903809075.1 | N/A |
| PDT000791170.2 | SAMEA70162168 | SAMEA70162168 | ERR2525218 | GCA 903809525.1 | N/A |
| PDT000791171.2 | SAMEA70162918 | SAMEA70162918 | ERR2525219 | GCA 903809545.1 | N/A |
| PDT000791172.2 | SAMEA70163668 | SAMEA70163668 | ERR2506464 | GCA 903809085.1 | N/A |
| PDT000791173.2 | SAMEA70164418 | SAMEA70164418 | ERR2525220 | GCA 903809555.1 | N/A |
| PDT000791177.2 | SAMEA70167418 | SAMEA70167418 | ERR2506466 | GCA 903809105.1 | N/A |
| PDT000791178.2 | SAMEA70168168 | SAMEA70168168 | ERR2525223 | GCA 903809585.1 | N/A |
| PDT000791179.2 | SAMEA70168918 | SAMEA70168918 | ERR2506467 | GCA 903809115.1 | N/A |
| PDT000791180.2 | SAMEA70169668 | SAMEA70169668 | ERR2525224 | GCA 903809595.1 | N/A |
| PDT000791181.2 | SAMEA70170418 | SAMEA70170418 | ERR2506468 | GCA 903809135.1 | N/A |
| PDT000791182.2 | SAMEA70171168 | SAMEA70171168 | ERR2525225 | GCA 903809605.1 | N/A |
| PDT000791183.2 | SAMEA70171918 | SAMEA70171918 | ERR2506469 | GCA 903809125.1 | N/A |
| PDT000791184.2 | SAMEA70172668 | SAMEA70172668 | ERR2525226 | GCA 903809615.1 | N/A |
| PDT000791185.2 | SAMEA70173418 | SAMEA70173418 | ERR2506470 | GCA 903809145.1 | N/A |
| PDT000791186.2 | SAMEA70174168 | SAMEA70174168 | ERR2525227 | GCA 903809625.1 | N/A |
| PDT000791187.2 | SAMEA70174918 | SAMEA70174918 | ERR2506471 | GCA 903809155.1 | N/A |
| PDT000791188.2 | SAMEA70175668 | SAMEA70175668 | ERR2525228 | GCA 903809635.1 | N/A |
| PDT000791189.2 | SAMEA70176418 | SAMEA70176418 | ERR2506472 | GCA 903809165.1 | N/A |
| PDT000791190.2 | SAMEA70177168 | SAMEA70177168 | ERR2525229 | GCA 903809645.1 | N/A |
| PDT000791191.2 | SAMEA70177918 | SAMEA70177918 | ERR2506473 | GCA 903809175.1 | N/A |
| PDT000791192.2 | SAMEA70178668 | SAMEA70178668 | ERR2506474 | GCA 903809185.1 | N/A |
| PDT000791193.2 | SAMEA70179418 | SAMEA70179418 | ERR2525230 | GCA 903809655.1 | N/A |
| PDT000791194.2 | SAMEA70180168 | SAMEA70180168 | ERR2506475 | GCA 903809195.1 | N/A |
| PDT000791195.2 | SAMEA70180918 | SAMEA70180918 | ERR2525231 | GCA 903809665.1 | N/A |
| PDT000791196.2 | SAMEA70181668 | SAMEA70181668 | ERR2506476 | GCA 903809215.1 | N/A |
| PDT000791197.2 | SAMEA70182418 | SAMEA70182418 | ERR2525232 | GCA 903809675.1 | N/A |
| PDT000791198.2 | SAMEA70183168 | SAMEA70183168 | ERR2506477 | GCA 903809205.1 | N/A |
| PDT000791199.2 | SAMEA70183918 | SAMEA70183918 | ERR2525233 | GCA 903809685.1 | N/A |
| PDT000791200.2 | SAMEA70184668 | SAMEA70184668 | ERR2506478 | GCA 903809225.1 | N/A |
| PDT000791201.2 | SAMEA70185418 | SAMEA70185418 | ERR2525234 | GCA 903809695.1 | N/A |
| PDT000791202.2 | SAMEA70186168 | SAMEA70186168 | ERR2506479 | GCA 903809235.1 | N/A |
| PDT000791203.2 | SAMEA70186918 | SAMEA70186918 | ERR2525235 | GCA 903809705.1 | N/A |
| PDT000791204.2 | SAMEA70187668 | SAMEA70187668 | ERR2506480 | GCA 903809255.1 | N/A |
| PDT000791205.2 | SAMEA70188418 | SAMEA70188418 | ERR2525236 | GCA 903809715.1 | N/A |
| PDT000791206.2 | SAMEA70200418 | SAMEA70200418 | ERR2506481 | GCA 903809245.1 | N/A |
| PDT000791207.2 | SAMEA70201168 | SAMEA70201168 | ERR2525237 | GCA 903809725.1 | N/A |
| PDT000791208.2 | SAMEA70201918 | SAMEA70201918 | ERR2525238 | GCA 903809735.1 | N/A |
| PDT000791209.2 | SAMEA70202668 | SAMEA70202668 | ERR2506482 | GCA 903809275.1 | N/A |
| PDT000791210.2 | SAMEA70203418 | SAMEA70203418 | ERR2506483 | GCA 903809265.1 | N/A |
| PDT000791211.2 | SAMEA70204168 | SAMEA70204168 | ERR2525239 | GCA 903809745.1 | N/A |
| PDT000791212.2 | SAMEA70204918 | SAMEA70204918 | ERR2506484 | GCA 903809285.1 | N/A |
| PDT000791213.2 | SAMEA70205668 | SAMEA70205668 | ERR2525240 | GCA 903809755.1 | N/A |
| PDT000791214.2 | SAMEA70206418 | SAMEA70206418 | ERR2506485 | GCA 903809295.1 | N/A |
| PDT000791215.2 | SAMEA70207168 | SAMEA70207168 | ERR2525241 | GCA 903809765.1 | N/A |

|                |               |               |            |                 |     |
|----------------|---------------|---------------|------------|-----------------|-----|
| PDT000791216.2 | SAMEA70207918 | SAMEA70207918 | ERR2506486 | GCA 903809305.1 | N/A |
| PDT000791217.2 | SAMEA70208668 | SAMEA70208668 | ERR2525242 | GCA 903809775.1 | N/A |
| PDT000791218.2 | SAMEA70209418 | SAMEA70209418 | ERR2506487 | GCA 903809315.1 | N/A |
| PDT000791219.2 | SAMEA70210168 | SAMEA70210168 | ERR2525243 | GCA 903809785.1 | N/A |
| PDT000791221.2 | SAMEA70211668 | SAMEA70211668 | ERR2506488 | GCA 903809325.1 | N/A |
| PDT000791222.2 | SAMEA70212418 | SAMEA70212418 | ERR2525245 | GCA 903809805.1 | N/A |
| PDT000791223.2 | SAMEA70213168 | SAMEA70213168 | ERR2506489 | GCA 903809335.1 | N/A |
| PDT000791224.2 | SAMEA70213918 | SAMEA70213918 | ERR2525246 | GCA 903809815.1 | N/A |
| PDT000791225.2 | SAMEA70214668 | SAMEA70214668 | ERR2506490 | GCA 903809345.1 | N/A |
| PDT000791227.2 | SAMEA70216168 | SAMEA70216168 | ERR2506491 | GCA 903809355.1 | N/A |
| PDT000791228.2 | SAMEA70216918 | SAMEA70216918 | ERR2525248 | GCA 903809835.1 | N/A |
| PDT000791229.2 | SAMEA70217668 | SAMEA70217668 | ERR2506492 | GCA 903809365.1 | N/A |
| PDT000791230.2 | SAMEA70218418 | SAMEA70218418 | ERR2525249 | GCA 903809855.1 | N/A |
| PDT000791231.2 | SAMEA70219168 | SAMEA70219168 | ERR2506493 | GCA 903809375.1 | N/A |
| PDT000791232.2 | SAMEA70219918 | SAMEA70219918 | ERR2506494 | GCA 903809385.1 | N/A |
| PDT000791234.2 | SAMEA70221418 | SAMEA70221418 | ERR2525251 | GCA 903809865.1 | N/A |
| PDT000791235.2 | SAMEA70222168 | SAMEA70222168 | ERR2506495 | GCA 903809395.1 | N/A |
| PDT000791236.2 | SAMEA70222918 | SAMEA70222918 | ERR2525252 | GCA 903809875.1 | N/A |
| PDT000791237.2 | SAMEA70223668 | SAMEA70223668 | ERR2506496 | GCA 903809405.1 | N/A |
| PDT000791238.2 | SAMEA70224418 | SAMEA70224418 | ERR2506497 | GCA 903809425.1 | N/A |
| PDT000791240.2 | SAMEA70225918 | SAMEA70225918 | ERR2525254 | GCA 903809895.1 | N/A |
| PDT000791241.2 | SAMEA70226668 | SAMEA70226668 | ERR2506498 | GCA 903809415.1 | N/A |
| PDT000791242.2 | SAMEA70227418 | SAMEA70227418 | ERR2525255 | GCA 903809905.1 | N/A |
| PDT000791243.2 | SAMEA70228168 | SAMEA70228168 | ERR2506499 | GCA 903809435.1 | N/A |
| PDT000791245.2 | SAMEA70229668 | SAMEA70229668 | ERR2506500 | GCA 903809445.1 | N/A |
| PDT000791247.2 | SAMEA70231168 | SAMEA70231168 | ERR2506501 | GCA 903809455.1 | N/A |
| PDT000791248.2 | SAMEA70231918 | SAMEA70231918 | ERR2525258 | GCA 903809935.1 | N/A |
| PDT000791249.2 | SAMEA70232668 | SAMEA70232668 | ERR2506502 | GCA 903809465.1 | N/A |
| PDT000791250.2 | SAMEA70233418 | SAMEA70233418 | ERR2525259 | GCA 903809945.1 | N/A |
| PDT000791252.2 | SAMEA70234918 | SAMEA70234918 | ERR2506503 | GCA 903809475.1 | N/A |
| PDT000791253.2 | SAMEA70235668 | SAMEA70235668 | ERR2525261 | GCA 903809965.1 | N/A |
| PDT000791255.2 | SAMEA70237168 | SAMEA70237168 | ERR2506504 | GCA 903809485.1 | N/A |
| PDT000791256.2 | SAMEA70237918 | SAMEA70237918 | ERR2525263 | GCA 903809985.1 | N/A |
| PDT000791257.2 | SAMEA70238668 | SAMEA70238668 | ERR2525264 | GCA 903809995.1 | N/A |
| PDT000791258.2 | SAMEA70239418 | SAMEA70239418 | ERR2525265 | GCA 903810005.1 | N/A |
| PDT000791260.2 | SAMEA70240918 | SAMEA70240918 | ERR2525267 | GCA 903810025.1 | N/A |
| PDT000791261.2 | SAMEA70241668 | SAMEA70241668 | ERR2525268 | GCA 903810035.1 | N/A |
| PDT000791262.2 | SAMEA70242418 | SAMEA70242418 | ERR2525269 | GCA 903810045.1 | N/A |
| PDT000791266.2 | SAMEA70245418 | SAMEA70245418 | ERR2525273 | GCA 903810085.1 | N/A |
| PDT000791269.2 | SAMEA70247668 | SAMEA70247668 | ERR2525276 | GCA 903810125.1 | N/A |
| PDT000791272.2 | SAMEA70249918 | SAMEA70249918 | ERR2525279 | GCA 903810145.1 | N/A |
| PDT000791274.2 | SAMEA70251418 | SAMEA70251418 | ERR2525281 | GCA 903810165.1 | N/A |
| PDT000791275.2 | SAMEA70252168 | SAMEA70252168 | ERR2525282 | GCA 903810175.1 | N/A |
| PDT000791277.2 | SAMEA70253668 | SAMEA70253668 | ERR2525284 | GCA 903810195.1 | N/A |
| PDT000791278.2 | SAMEA70254418 | SAMEA70254418 | ERR2525285 | GCA 903810215.1 | N/A |
| PDT000791279.2 | SAMEA70255168 | SAMEA70255168 | ERR2525286 | GCA 903810225.1 | N/A |
| PDT000791280.2 | SAMEA70255918 | SAMEA70255918 | ERR2525287 | GCA 903810205.1 | N/A |
| PDT000791284.2 | SAMEA70258168 | SAMEA70258168 | ERR2525290 | GCA 903810265.1 | N/A |
| PDT000791285.2 | SAMEA70258918 | SAMEA70258918 | ERR2525291 | GCA 903810255.1 | N/A |
| PDT000791288.2 | SAMEA70261168 | SAMEA70261168 | ERR2525294 | GCA 903810295.1 | N/A |
| PDT000791291.2 | SAMEA70263418 | SAMEA70263418 | ERR2525297 | GCA 903810325.1 | N/A |
| PDT000791292.2 | SAMEA70264168 | SAMEA70264168 | ERR2525298 | GCA 903810335.1 | N/A |
| PDT000791293.2 | SAMEA70264918 | SAMEA70264918 | ERR2525299 | GCA 903810345.1 | N/A |
| PDT000791294.2 | SAMEA70265668 | SAMEA70265668 | ERR2525300 | GCA 903810355.1 | N/A |
| PDT000791298.2 | SAMEA70267168 | SAMEA70267168 | ERR2525302 | GCA 903810385.1 | N/A |
| PDT000791301.2 | SAMEA70267918 | SAMEA70267918 | ERR2525303 | GCA 903810375.1 | N/A |
| PDT000791302.2 | SAMEA70268668 | SAMEA70268668 | ERR2525304 | GCA 903810395.1 | N/A |
| PDT000791305.2 | SAMEA70270918 | SAMEA70270918 | ERR2525307 | GCA 903810415.1 | N/A |
| PDT000791306.2 | SAMEA70271668 | SAMEA70271668 | ERR2525308 | GCA 903810425.1 | N/A |
| PDT000791307.2 | SAMEA70272418 | SAMEA70272418 | ERR2525309 | GCA 903810445.1 | N/A |
| PDT000791308.2 | SAMEA70273168 | SAMEA70273168 | ERR2525310 | GCA 903810455.1 | N/A |
| PDT000791309.2 | SAMEA70273918 | SAMEA70273918 | ERR2525311 | GCA 903810465.1 | N/A |
| PDT000791310.2 | SAMEA70274668 | SAMEA70274668 | ERR2525312 | GCA 903810475.1 | N/A |
| PDT000791311.2 | SAMEA70275418 | SAMEA70275418 | ERR2525313 | GCA 903810485.1 | N/A |
| PDT000791313.2 | SAMEA70276168 | SAMEA70276168 | ERR2525314 | GCA 903810505.1 | N/A |
| PDT000791315.2 | SAMEA70276918 | SAMEA70276918 | ERR2525315 | GCA 903810495.1 | N/A |
| PDT000791316.2 | SAMEA70277668 | SAMEA70277668 | ERR2525316 | GCA 903810515.1 | N/A |
| PDT000791318.2 | SAMEA70279168 | SAMEA70279168 | ERR2525318 | GCA 903810535.1 | N/A |

|                |               |               |             |                 |     |
|----------------|---------------|---------------|-------------|-----------------|-----|
| PDT000791319.2 | SAMEA70279918 | SAMEA70279918 | ERR2525319  | GCA 903810545.1 | N/A |
| PDT000791320.2 | SAMEA70280668 | SAMEA70280668 | ERR2525320  | GCA 903810555.1 | N/A |
| PDT000791322.2 | SAMEA70282168 | SAMEA70282168 | ERR2525322  | GCA 903810575.1 | N/A |
| PDT000791324.2 | SAMEA70283668 | SAMEA70283668 | ERR2525324  | GCA 903810595.1 | N/A |
| PDT000791325.2 | SAMEA70284418 | SAMEA70284418 | ERR2525325  | GCA 903810605.1 | N/A |
| PDT000791326.2 | SAMEA70285168 | SAMEA70285168 | ERR2525326  | GCA 903810635.1 | N/A |
| PDT000791327.2 | SAMEA70285918 | SAMEA70285918 | ERR2525327  | GCA 903810625.1 | N/A |
| PDT000791328.2 | SAMEA70286668 | SAMEA70286668 | ERR2525328  | GCA 903810615.1 | N/A |
| PDT000791329.2 | SAMEA70287418 | SAMEA70287418 | ERR2525329  | GCA 903810645.1 | N/A |
| PDT000791330.2 | SAMEA70288168 | SAMEA70288168 | ERR2525330  | GCA 903810655.1 | N/A |
| PDT000791331.2 | SAMEA70288918 | SAMEA70288918 | ERR2525331  | GCA 903810665.1 | N/A |
| PDT000791332.2 | SAMEA70289668 | SAMEA70289668 | ERR2525332  | GCA 903810675.1 | N/A |
| PDT000791333.2 | SAMEA70290418 | SAMEA70290418 | ERR2525333  | GCA 903810685.1 | N/A |
| PDT000791336.2 | SAMEA70292668 | SAMEA70292668 | ERR2525336  | GCA 903810715.1 | N/A |
| PDT000791340.2 | SAMEA70295668 | SAMEA70295668 | ERR2525340  | GCA 903810755.1 | N/A |
| PDT000791343.2 | SAMEA70297918 | SAMEA70297918 | ERR2525343  | GCA 903810775.1 | N/A |
| PDT000791344.2 | SAMEA70298668 | SAMEA70298668 | ERR2525344  | GCA 903810795.1 | N/A |
| PDT000791345.2 | SAMEA70299418 | SAMEA70299418 | ERR2525345  | GCA 903810805.1 | N/A |
| PDT000791346.2 | SAMEA70300168 | SAMEA70300168 | ERR2525346  | GCA 903810815.1 | N/A |
| PDT000791347.2 | SAMEA70300918 | SAMEA70300918 | ERR2525347  | GCA 903810825.1 | N/A |
| PDT000791348.2 | SAMEA70301668 | SAMEA70301668 | ERR2525348  | GCA 903810835.1 | N/A |
| PDT000791349.2 | SAMEA70302418 | SAMEA70302418 | ERR2525349  | GCA 903810845.1 | N/A |
| PDT000791350.2 | SAMEA70303168 | SAMEA70303168 | ERR2525350  | GCA 903810855.1 | N/A |
| PDT000791351.2 | SAMEA70303918 | SAMEA70303918 | ERR2525351  | GCA 903810865.1 | N/A |
| PDT000791352.2 | SAMEA70304668 | SAMEA70304668 | ERR2525352  | GCA 903810875.1 | N/A |
| PDT000791354.2 | SAMEA70306168 | SAMEA70306168 | ERR2525354  | GCA 903810895.1 | N/A |
| PDT000791355.2 | SAMEA70306918 | SAMEA70306918 | ERR2525355  | GCA 903810905.1 | N/A |
| PDT000791356.2 | SAMEA70307668 | SAMEA70307668 | ERR2525356  | GCA 903810925.1 | N/A |
| PDT000791357.2 | SAMEA70308418 | SAMEA70308418 | ERR2525357  | GCA 903810915.1 | N/A |
| PDT000791358.2 | SAMEA70309168 | SAMEA70309168 | ERR2525358  | GCA 903810935.1 | N/A |
| PDT000791360.2 | SAMEA70310668 | SAMEA70310668 | ERR2525360  | GCA 903810955.1 | N/A |
| PDT000791361.2 | SAMEA70311418 | SAMEA70311418 | ERR2525361  | GCA 903810965.1 | N/A |
| PDT000791362.2 | SAMEA70312168 | SAMEA70312168 | ERR2525362  | GCA 903810975.1 | N/A |
| PDT000791363.2 | SAMEA70312918 | SAMEA70312918 | ERR2525363  | GCA 903810985.1 | N/A |
| PDT000791364.2 | SAMEA70313668 | SAMEA70313668 | ERR2525364  | GCA 903810995.1 | N/A |
| PDT000791365.2 | SAMEA70314418 | SAMEA70314418 | ERR2525365  | GCA 903811005.1 | N/A |
| PDT000791366.2 | SAMEA70315168 | SAMEA70315168 | ERR2525366  | GCA 903811015.1 | N/A |
| PDT000791369.2 | SAMEA70317418 | SAMEA70317418 | ERR2525369  | GCA 903811045.1 | N/A |
| PDT000791370.2 | SAMEA70318168 | SAMEA70318168 | ERR2525370  | GCA 903811055.1 | N/A |
| PDT000791371.2 | SAMEA70318918 | SAMEA70318918 | ERR2525371  | GCA 903811065.1 | N/A |
| PDT000791372.2 | SAMEA70319668 | SAMEA70319668 | ERR2525372  | GCA 903811075.1 | N/A |
| PDT000791373.2 | SAMEA70320418 | SAMEA70320418 | ERR2525373  | GCA 903811085.1 | N/A |
| PDT000791374.2 | SAMEA70321168 | SAMEA70321168 | ERR2525374  | GCA 903811095.1 | N/A |
| PDT000791375.2 | SAMEA70321918 | SAMEA70321918 | ERR2525375  | GCA 903811105.1 | N/A |
| PDT000791381.2 | SAMEA70326418 | SAMEA70326418 | ERR2525381  | GCA 903811165.1 | N/A |
| PDT000791384.2 | SAMEA70328668 | SAMEA70328668 | ERR2525384  | GCA 903811195.1 | N/A |
| PDT000791387.2 | SAMEA70330918 | SAMEA70330918 | ERR2525387  | GCA 903811225.1 | N/A |
| PDT000791396.2 | SAMEA70337668 | SAMEA70337668 | ERR2525396  | GCA 903811315.1 | N/A |
| PDT000791398.2 | SAMEA70339168 | SAMEA70339168 | ERR2525398  | GCA 903811335.1 | N/A |
| PDT000791399.2 | SAMEA70339918 | SAMEA70339918 | ERR2525399  | GCA 903811345.1 | N/A |
| PDT000791402.2 | SAMEA70342168 | SAMEA70342168 | ERR2525402  | GCA 903811375.1 | N/A |
| PDT000800902.2 | SAMN15430096  | SAMN15430096  | SRR12142664 | GCA 013836525.1 | N/A |
| PDT000800903.2 | SAMN15430097  | SAMN15430097  | SRR12142665 | GCA 013836745.1 | N/A |
| PDT000804944.2 | SAMEA6125849  | SAMEA6125849  | ERR3623773  | GCA 903987375.1 | N/A |
| PDT000804946.2 | SAMEA6125835  | SAMEA6125835  | ERR3623770  | GCA 903987325.1 | N/A |
| PDT000804964.2 | SAMEA6125716  | SAMEA6125716  | ERR3623582  | GCA 903987495.1 | N/A |
| PDT000804967.2 | SAMEA6125846  | SAMEA6125846  | ERR3623784  | GCA 903987575.1 | N/A |
| PDT000804969.2 | SAMEA6125714  | SAMEA6125714  | ERR3623583  | GCA 903987515.1 | N/A |
| PDT000804975.2 | SAMEA6125851  | SAMEA6125851  | ERR3623785  | GCA 903987635.1 | N/A |
| PDT000804981.2 | SAMEA6125861  | SAMEA6125861  | ERR3623794  | GCA 903987665.1 | N/A |
| PDT000804984.2 | SAMEA6125865  | SAMEA6125865  | ERR3623799  | GCA 903987735.1 | N/A |
| PDT000804986.2 | SAMEA6125928  | SAMEA6125928  | ERR3623866  | GCA 903987705.1 | N/A |
| PDT000804991.2 | SAMEA6125689  | SAMEA6125689  | ERR3623559  | GCA 903987765.1 | N/A |
| PDT000804993.2 | SAMEA6125869  | SAMEA6125869  | ERR3623800  | GCA 903987755.1 | N/A |
| PDT000804994.2 | SAMEA6125882  | SAMEA6125882  | ERR3623808  | GCA 903987835.1 | N/A |
| PDT000804995.2 | SAMEA6125876  | SAMEA6125876  | ERR3623805  | GCA 903987795.1 | N/A |
| PDT000804998.2 | SAMEA6125867  | SAMEA6125867  | ERR3623810  | GCA 903987805.1 | N/A |
| PDT000804999.2 | SAMEA6125874  | SAMEA6125874  | ERR3623809  | GCA 903987845.1 | N/A |



|                |              |              |            |                  |     |
|----------------|--------------|--------------|------------|------------------|-----|
| PDT000805000.2 | SAMEA6125873 | SAMEA6125873 | ERR3623802 | GCA 903987855.1  | N/A |
| PDT000805005.2 | SAMEA6125845 | SAMEA6125845 | ERR3623777 | GCA 903987895.1  | N/A |
| PDT000805006.2 | SAMEA6125862 | SAMEA6125862 | ERR3623798 | GCA 903987915.1  | N/A |
| PDT000805010.2 | SAMEA6125688 | SAMEA6125688 | ERR3623558 | GCA 903987955.1  | N/A |
| PDT000805011.2 | SAMEA6125705 | SAMEA6125705 | ERR3623566 | GCA 903988015.1  | N/A |
| PDT000805015.2 | SAMEA6125701 | SAMEA6125701 | ERR3623567 | GCA 903988025.1  | N/A |
| PDT000805019.2 | SAMEA6125704 | SAMEA6125704 | ERR3623573 | GCA 903988065.1  | N/A |
| PDT000805020.2 | SAMEA6125710 | SAMEA6125710 | ERR3623576 | GCA 903988045.1  | N/A |
| PDT000805021.2 | SAMEA6125709 | SAMEA6125709 | ERR3623578 | GCA 903988055.1  | N/A |
| PDT000805022.2 | SAMEA6125693 | SAMEA6125693 | ERR3623556 | GCA 903988075.1  | N/A |
| PDT000805024.2 | SAMEA6125883 | SAMEA6125883 | ERR3623811 | GCA 903988105.1  | N/A |
| PDT000805026.2 | SAMEA6125683 | SAMEA6125683 | ERR3623557 | GCA 903988115.1  | N/A |
| PDT000805027.2 | SAMEA6125890 | SAMEA6125890 | ERR3623812 | GCA 903988135.1  | N/A |
| PDT000805028.2 | SAMEA6125886 | SAMEA6125886 | ERR3623816 | GCA 903988125.1  | N/A |
| PDT000805029.2 | SAMEA6125748 | SAMEA6125748 | ERR3623574 | GCA 903988145.1  | N/A |
| PDT000805030.2 | SAMEA6125879 | SAMEA6125879 | ERR3623815 | GCA 903988215.1  | N/A |
| PDT000805031.2 | SAMEA6125684 | SAMEA6125684 | ERR3623555 | GCA 903988185.1  | N/A |
| PDT000805037.2 | SAMEA6125881 | SAMEA6125881 | ERR3623818 | GCA 903988165.1  | N/A |
| PDT000805049.2 | SAMEA6125961 | SAMEA6125961 | ERR3623887 | GCA 903988335.1  | N/A |
| PDT000805059.2 | SAMEA6125690 | SAMEA6125690 | ERR3623554 | GCA 903988435.1  | N/A |
| PDT000805096.2 | SAMEA6125948 | SAMEA6125948 | ERR3623865 | GCA 903988815.1  | N/A |
| PDT000805098.2 | SAMEA6125669 | SAMEA6125669 | ERR3623536 | GCA 903988835.1  | N/A |
| PDT000805106.2 | SAMEA6125667 | SAMEA6125667 | ERR3623532 | GCA 903988895.1  | N/A |
| PDT000805118.2 | SAMEA6125811 | SAMEA6125811 | ERR3623749 | GCA 903989025.1  | N/A |
| PDT000805126.2 | SAMEA6125824 | SAMEA6125824 | ERR3623761 | GCA 903989075.1  | N/A |
| PDT000805127.2 | SAMEA6125815 | SAMEA6125815 | ERR3623752 | GCA 903989115.1  | N/A |
| PDT000805128.2 | SAMEA6125830 | SAMEA6125830 | ERR3623756 | GCA 903989125.1  | N/A |
| PDT000805148.2 | SAMEA6125812 | SAMEA6125812 | ERR3623750 | GCA 903989305.1  | N/A |
| PDT000805194.2 | SAMEA5886132 | SAMEA5886132 | ERR3494979 | GCA 903989585.1  | N/A |
| PDT000805218.2 | SAMEA5886159 | SAMEA5886159 | ERR3497294 | GCA 903989805.1  | N/A |
| PDT000805301.2 | SAMEA5886248 | SAMEA5886248 | ERR3498953 | GCA 903990745.1  | N/A |
| PDT000805401.2 | SAMEA5886115 | SAMEA5886115 | ERR3494856 | GCA 903991795.1  | N/A |
| PDT000805817.2 | SAMEA6125708 | SAMEA6125708 | ERR3623579 | GCA 903994015.1  | N/A |
| PDT000811357.1 | SAMEA4387358 | SAMEA4387358 | ERR1788927 | GCA 015582515.1  | N/A |
| PDT000811358.1 | SAMEA4387065 | SAMEA4387065 | ERR1788928 | GCA 015582555.1  | N/A |
| PDT000811359.1 | SAMEA4387675 | SAMEA4387675 | ERR1788929 | GCA 015582575.1  | N/A |
| PDT000811360.1 | SAMEA4387066 | SAMEA4387066 | ERR1788930 | GCA 015582495.1  | N/A |
| PDT000811361.1 | SAMEA4387359 | SAMEA4387359 | ERR1788931 | GCA 0155866025.1 | N/A |
| PDT000811362.1 | SAMEA4387067 | SAMEA4387067 | ERR1788932 | GCA 015582535.1  | N/A |
| PDT000811363.1 | SAMEA4387504 | SAMEA4387504 | ERR1788933 | GCA 015582465.1  | N/A |
| PDT000811365.1 | SAMEA4387069 | SAMEA4387069 | ERR1788935 | GCA 015582455.1  | N/A |
| PDT000811366.1 | SAMEA4387604 | SAMEA4387604 | ERR1788936 | GCA 015582375.1  | N/A |
| PDT000811367.1 | SAMEA4387070 | SAMEA4387070 | ERR1788937 | GCA 015582395.1  | N/A |
| PDT000811369.1 | SAMEA4387071 | SAMEA4387071 | ERR1788939 | GCA 015582175.1  | N/A |
| PDT000811370.1 | SAMEA4387505 | SAMEA4387505 | ERR1788940 | GCA 015581975.1  | N/A |
| PDT000811371.1 | SAMEA4387072 | SAMEA4387072 | ERR1788941 | GCA 015581995.1  | N/A |
| PDT000811373.1 | SAMEA4387073 | SAMEA4387073 | ERR1788943 | GCA 015582335.1  | N/A |
| PDT000811374.1 | SAMEA4387711 | SAMEA4387711 | ERR1788944 | GCA 015581955.1  | N/A |
| PDT000811375.1 | SAMEA4387074 | SAMEA4387074 | ERR1788945 | GCA 015582075.1  | N/A |
| PDT000811376.1 | SAMEA4387363 | SAMEA4387363 | ERR1788946 | GCA 015582055.1  | N/A |
| PDT000811378.1 | SAMEA4387506 | SAMEA4387506 | ERR1788948 | GCA 015582035.1  | N/A |
| PDT000811379.1 | SAMEA4387076 | SAMEA4387076 | ERR1788949 | GCA 015582355.1  | N/A |
| PDT000811380.1 | SAMEA4387364 | SAMEA4387364 | ERR1788950 | GCA 015582315.1  | N/A |
| PDT000811381.1 | SAMEA4387077 | SAMEA4387077 | ERR1788951 | GCA 015582295.1  | N/A |
| PDT000811382.1 | SAMEA4387605 | SAMEA4387605 | ERR1788952 | GCA 015582215.1  | N/A |
| PDT000811383.1 | SAMEA4387078 | SAMEA4387078 | ERR1788953 | GCA 015582255.1  | N/A |
| PDT000811384.1 | SAMEA4387365 | SAMEA4387365 | ERR1788954 | GCA 015582235.1  | N/A |
| PDT000811386.1 | SAMEA4387507 | SAMEA4387507 | ERR1788956 | GCA 015582135.1  | N/A |
| PDT000811387.1 | SAMEA4387080 | SAMEA4387080 | ERR1788957 | GCA 015582155.1  | N/A |
| PDT000811388.1 | SAMEA4387366 | SAMEA4387366 | ERR1788958 | GCA 015582195.1  | N/A |
| PDT000811389.1 | SAMEA4387081 | SAMEA4387081 | ERR1788959 | GCA 015582115.1  | N/A |
| PDT000811391.1 | SAMEA4387082 | SAMEA4387082 | ERR1788961 | GCA 015581895.1  | N/A |
| PDT000811392.1 | SAMEA4387367 | SAMEA4387367 | ERR1788962 | GCA 015581915.1  | N/A |
| PDT000811393.1 | SAMEA4387083 | SAMEA4387083 | ERR1788963 | GCA 015581875.1  | N/A |
| PDT000811394.1 | SAMEA4387508 | SAMEA4387508 | ERR1788964 | GCA 015581815.1  | N/A |
| PDT000811396.1 | SAMEA4387368 | SAMEA4387368 | ERR1788966 | GCA 015581835.1  | N/A |
| PDT000811398.1 | SAMEA4387606 | SAMEA4387606 | ERR1788968 | GCA 015581735.1  | N/A |
| PDT000811399.1 | SAMEA4387086 | SAMEA4387086 | ERR1788969 | GCA 015581715.1  | N/A |

|                |              |              |            |                 |     |
|----------------|--------------|--------------|------------|-----------------|-----|
| PDT000811400.1 | SAMEA4387369 | SAMEA4387369 | ERR1788970 | GCA 015581775.1 | N/A |
| PDT000811401.1 | SAMEA4387087 | SAMEA4387087 | ERR1788971 | GCA 015581745.1 | N/A |
| PDT000811402.1 | SAMEA4387509 | SAMEA4387509 | ERR1788972 | GCA 015581655.1 | N/A |
| PDT000811404.1 | SAMEA4387089 | SAMEA4387089 | ERR1788974 | GCA 015581635.1 | N/A |
| PDT000811405.1 | SAMEA4387728 | SAMEA4387728 | ERR1788975 | GCA 015581645.1 | N/A |
| PDT000811406.1 | SAMEA4387090 | SAMEA4387090 | ERR1788976 | GCA 015581595.1 | N/A |
| PDT000811407.1 | SAMEA4387371 | SAMEA4387371 | ERR1788977 | GCA 015581615.1 | N/A |
| PDT000811408.1 | SAMEA4387091 | SAMEA4387091 | ERR1788978 | GCA 015581535.1 | N/A |
| PDT000811409.1 | SAMEA4387510 | SAMEA4387510 | ERR1788979 | GCA 015581575.1 | N/A |
| PDT000811410.1 | SAMEA4387372 | SAMEA4387372 | ERR1788980 | GCA 015581455.1 | N/A |
| PDT000811411.1 | SAMEA4387093 | SAMEA4387093 | ERR1788981 | GCA 015581415.1 | N/A |
| PDT000811412.1 | SAMEA4387607 | SAMEA4387607 | ERR1788982 | GCA 015581545.1 | N/A |
| PDT000811413.1 | SAMEA4387094 | SAMEA4387094 | ERR1788983 | GCA 015580975.1 | N/A |
| PDT000811417.1 | SAMEA4387096 | SAMEA4387096 | ERR1788987 | GCA 015581495.1 | N/A |
| PDT000811418.1 | SAMEA4387374 | SAMEA4387374 | ERR1788988 | GCA 015581405.1 | N/A |
| PDT000811419.1 | SAMEA4387097 | SAMEA4387097 | ERR1788989 | GCA 015581515.1 | N/A |
| PDT000811420.1 | SAMEA4387098 | SAMEA4387098 | ERR1788990 | GCA 015581375.1 | N/A |
| PDT000811421.1 | SAMEA4387375 | SAMEA4387375 | ERR1788991 | GCA 015581235.1 | N/A |
| PDT000811422.1 | SAMEA4387099 | SAMEA4387099 | ERR1788992 | GCA 015581275.1 | N/A |
| PDT000811423.1 | SAMEA4387512 | SAMEA4387512 | ERR1788993 | GCA 015581395.1 | N/A |
| PDT000811424.1 | SAMEA4387100 | SAMEA4387100 | ERR1788994 | GCA 015581355.1 | N/A |
| PDT000811425.1 | SAMEA4387376 | SAMEA4387376 | ERR1788995 | GCA 015581325.1 | N/A |
| PDT000811426.1 | SAMEA4387101 | SAMEA4387101 | ERR1788996 | GCA 015581215.1 | N/A |
| PDT000811427.1 | SAMEA4387608 | SAMEA4387608 | ERR1788997 | GCA 015581255.1 | N/A |
| PDT000811428.1 | SAMEA4387102 | SAMEA4387102 | ERR1788998 | GCA 015581315.1 | N/A |
| PDT000811429.1 | SAMEA4387103 | SAMEA4387103 | ERR1788999 | GCA 015581075.1 | N/A |
| PDT000811430.1 | SAMEA4387513 | SAMEA4387513 | ERR1789000 | GCA 015580995.1 | N/A |
| PDT000811431.1 | SAMEA4387104 | SAMEA4387104 | ERR1789001 | GCA 015581115.1 | N/A |
| PDT000811432.1 | SAMEA4387378 | SAMEA4387378 | ERR1789002 | GCA 015580955.1 | N/A |
| PDT000811433.1 | SAMEA4387105 | SAMEA4387105 | ERR1789003 | GCA 015581055.1 | N/A |
| PDT000811434.1 | SAMEA4387712 | SAMEA4387712 | ERR1789004 | GCA 015581175.1 | N/A |
| PDT000811435.1 | SAMEA4387106 | SAMEA4387106 | ERR1789005 | GCA 015581195.1 | N/A |
| PDT000811438.1 | SAMEA4387514 | SAMEA4387514 | ERR1789008 | GCA 015581095.1 | N/A |
| PDT000811439.1 | SAMEA4387108 | SAMEA4387108 | ERR1789009 | GCA 015580855.1 | N/A |
| PDT000811440.1 | SAMEA4387380 | SAMEA4387380 | ERR1789010 | GCA 015580895.1 | N/A |
| PDT000811441.1 | SAMEA4387109 | SAMEA4387109 | ERR1789011 | GCA 015581295.1 | N/A |
| PDT000811442.1 | SAMEA4387609 | SAMEA4387609 | ERR1789012 | GCA 015580875.1 | N/A |
| PDT000811443.1 | SAMEA4387110 | SAMEA4387110 | ERR1789013 | GCA 015581125.1 | N/A |
| PDT000811444.1 | SAMEA4387381 | SAMEA4387381 | ERR1789014 | GCA 015580915.1 | N/A |
| PDT000811445.1 | SAMEA4387111 | SAMEA4387111 | ERR1789015 | GCA 015580795.1 | N/A |
| PDT000811446.1 | SAMEA4387515 | SAMEA4387515 | ERR1789016 | GCA 015580835.1 | N/A |
| PDT000811447.1 | SAMEA4387112 | SAMEA4387112 | ERR1789017 | GCA 015580775.1 | N/A |
| PDT000811448.1 | SAMEA4387382 | SAMEA4387382 | ERR1789018 | GCA 015580715.1 | N/A |
| PDT000811449.1 | SAMEA4387113 | SAMEA4387113 | ERR1789019 | GCA 015580815.1 | N/A |
| PDT000811450.1 | SAMEA4387678 | SAMEA4387678 | ERR1789020 | GCA 015580695.1 | N/A |
| PDT000811451.1 | SAMEA4387114 | SAMEA4387114 | ERR1789021 | GCA 015580675.1 | N/A |
| PDT000811452.1 | SAMEA4387383 | SAMEA4387383 | ERR1789022 | GCA 015580755.1 | N/A |
| PDT000811453.1 | SAMEA4387115 | SAMEA4387115 | ERR1789023 | GCA 015580735.1 | N/A |
| PDT000811454.1 | SAMEA4387516 | SAMEA4387516 | ERR1789024 | GCA 015580595.1 | N/A |
| PDT000811455.1 | SAMEA4387116 | SAMEA4387116 | ERR1789025 | GCA 015580635.1 | N/A |
| PDT000811456.1 | SAMEA4387384 | SAMEA4387384 | ERR1789026 | GCA 015580615.1 | N/A |
| PDT000811458.1 | SAMEA4387610 | SAMEA4387610 | ERR1789028 | GCA 015580575.1 | N/A |
| PDT000811459.1 | SAMEA4387118 | SAMEA4387118 | ERR1789029 | GCA 015580555.1 | N/A |
| PDT000811462.1 | SAMEA4387517 | SAMEA4387517 | ERR1789032 | GCA 015580515.1 | N/A |
| PDT000811463.1 | SAMEA4387120 | SAMEA4387120 | ERR1789033 | GCA 015580475.1 | N/A |
| PDT000811464.1 | SAMEA4387386 | SAMEA4387386 | ERR1789034 | GCA 015579635.1 | N/A |
| PDT000811465.1 | SAMEA4387121 | SAMEA4387121 | ERR1789035 | GCA 015579715.1 | N/A |
| PDT000811466.1 | SAMEA4387741 | SAMEA4387741 | ERR1789036 | GCA 015579695.1 | N/A |
| PDT000811467.1 | SAMEA4387122 | SAMEA4387122 | ERR1789037 | GCA 015579655.1 | N/A |
| PDT000811468.1 | SAMEA4387387 | SAMEA4387387 | ERR1789038 | GCA 015579195.1 | N/A |
| PDT000811469.1 | SAMEA4387123 | SAMEA4387123 | ERR1789039 | GCA 015579355.1 | N/A |
| PDT000811470.1 | SAMEA4387518 | SAMEA4387518 | ERR1789040 | GCA 015580095.1 | N/A |
| PDT000811471.1 | SAMEA4387124 | SAMEA4387124 | ERR1789041 | GCA 015579275.1 | N/A |
| PDT000811472.1 | SAMEA4387388 | SAMEA4387388 | ERR1789042 | GCA 015579255.1 | N/A |
| PDT000811473.1 | SAMEA4387125 | SAMEA4387125 | ERR1789043 | GCA 015579675.1 | N/A |
| PDT000811474.1 | SAMEA4387611 | SAMEA4387611 | ERR1789044 | GCA 015580215.1 | N/A |
| PDT000811475.1 | SAMEA4387126 | SAMEA4387126 | ERR1789045 | GCA 015580435.1 | N/A |
| PDT000811476.1 | SAMEA4387389 | SAMEA4387389 | ERR1789046 | GCA 015580295.1 | N/A |

|                |              |              |            |                 |     |
|----------------|--------------|--------------|------------|-----------------|-----|
| PDT000811477.1 | SAMEA4387127 | SAMEA4387127 | ERR1789047 | GCA 015579575.1 | N/A |
| PDT000811478.1 | SAMEA4387519 | SAMEA4387519 | ERR1789048 | GCA 015579595.1 | N/A |
| PDT000811479.1 | SAMEA4387128 | SAMEA4387128 | ERR1789049 | GCA 015579615.1 | N/A |
| PDT000811480.1 | SAMEA4387390 | SAMEA4387390 | ERR1789050 | GCA 015579555.1 | N/A |
| PDT000811481.1 | SAMEA4387129 | SAMEA4387129 | ERR1789051 | GCA 015579515.1 | N/A |
| PDT000811482.1 | SAMEA4387679 | SAMEA4387679 | ERR1789052 | GCA 015579535.1 | N/A |
| PDT000811483.1 | SAMEA4387130 | SAMEA4387130 | ERR1789053 | GCA 015579415.1 | N/A |
| PDT000811485.1 | SAMEA4387131 | SAMEA4387131 | ERR1789055 | GCA 015579915.1 | N/A |
| PDT000811488.1 | SAMEA4387392 | SAMEA4387392 | ERR1789058 | GCA 015579855.1 | N/A |
| PDT000811489.1 | SAMEA4387133 | SAMEA4387133 | ERR1789059 | GCA 015579475.1 | N/A |
| PDT000811490.1 | SAMEA4387612 | SAMEA4387612 | ERR1789060 | GCA 015579795.1 | N/A |
| PDT000811491.1 | SAMEA4387134 | SAMEA4387134 | ERR1789061 | GCA 015579835.1 | N/A |
| PDT000811492.1 | SAMEA4387393 | SAMEA4387393 | ERR1789062 | GCA 015579775.1 | N/A |
| PDT000811493.1 | SAMEA4387135 | SAMEA4387135 | ERR1789063 | GCA 015579805.1 | N/A |
| PDT000811494.1 | SAMEA4387521 | SAMEA4387521 | ERR1789064 | GCA 015579735.1 | N/A |
| PDT000811495.1 | SAMEA4387394 | SAMEA4387394 | ERR1789065 | GCA 015579335.1 | N/A |
| PDT000811496.1 | SAMEA4387137 | SAMEA4387137 | ERR1789066 | GCA 015579755.1 | N/A |
| PDT000811498.1 | SAMEA4387138 | SAMEA4387138 | ERR1789068 | GCA 015579375.1 | N/A |
| PDT000811499.1 | SAMEA4387395 | SAMEA4387395 | ERR1789069 | GCA 015579395.1 | N/A |
| PDT000811500.1 | SAMEA4387139 | SAMEA4387139 | ERR1789070 | GCA 015579305.1 | N/A |
| PDT000811501.1 | SAMEA4387522 | SAMEA4387522 | ERR1789071 | GCA 015579295.1 | N/A |
| PDT000811502.1 | SAMEA4387140 | SAMEA4387140 | ERR1789072 | GCA 015579425.1 | N/A |
| PDT000811503.1 | SAMEA4387396 | SAMEA4387396 | ERR1789073 | GCA 015579215.1 | N/A |
| PDT000811504.1 | SAMEA4387141 | SAMEA4387141 | ERR1789074 | GCA 015580445.1 | N/A |
| PDT000811505.1 | SAMEA4387613 | SAMEA4387613 | ERR1789075 | GCA 015580375.1 | N/A |
| PDT000811507.1 | SAMEA4387397 | SAMEA4387397 | ERR1789077 | GCA 015580395.1 | N/A |
| PDT000811508.1 | SAMEA4387143 | SAMEA4387143 | ERR1789078 | GCA 015580415.1 | N/A |
| PDT000811510.1 | SAMEA4387144 | SAMEA4387144 | ERR1789080 | GCA 015580275.1 | N/A |
| PDT000811511.1 | SAMEA4387398 | SAMEA4387398 | ERR1789081 | GCA 015580065.1 | N/A |
| PDT000811512.1 | SAMEA4387145 | SAMEA4387145 | ERR1789082 | GCA 015580155.1 | N/A |
| PDT000811513.1 | SAMEA4387680 | SAMEA4387680 | ERR1789083 | GCA 015580135.1 | N/A |
| PDT000811514.1 | SAMEA4387146 | SAMEA4387146 | ERR1789084 | GCA 015579935.1 | N/A |
| PDT000811517.1 | SAMEA4387524 | SAMEA4387524 | ERR1789087 | GCA 015580055.1 | N/A |
| PDT000811518.1 | SAMEA4387148 | SAMEA4387148 | ERR1789088 | GCA 015580255.1 | N/A |
| PDT000811520.1 | SAMEA4387149 | SAMEA4387149 | ERR1789090 | GCA 015580035.1 | N/A |
| PDT000811521.1 | SAMEA4387614 | SAMEA4387614 | ERR1789091 | GCA 015579975.1 | N/A |
| PDT000811522.1 | SAMEA4387150 | SAMEA4387150 | ERR1789092 | GCA 015580335.1 | N/A |
| PDT000811523.1 | SAMEA4387401 | SAMEA4387401 | ERR1789093 | GCA 015580015.1 | N/A |
| PDT000811525.1 | SAMEA4387525 | SAMEA4387525 | ERR1789095 | GCA 015579235.1 | N/A |
| PDT000811528.1 | SAMEA4387153 | SAMEA4387153 | ERR1789098 | GCA 015579115.1 | N/A |
| PDT000811529.1 | SAMEA4387729 | SAMEA4387729 | ERR1789099 | GCA 015579175.1 | N/A |
| PDT000811530.1 | SAMEA4387154 | SAMEA4387154 | ERR1789100 | GCA 015579095.1 | N/A |
| PDT000811531.1 | SAMEA4387403 | SAMEA4387403 | ERR1789101 | GCA 015579015.1 | N/A |
| PDT000811532.1 | SAMEA4387155 | SAMEA4387155 | ERR1789102 | GCA 015579075.1 | N/A |
| PDT000811533.1 | SAMEA4387526 | SAMEA4387526 | ERR1789103 | GCA 015579055.1 | N/A |
| PDT000811535.1 | SAMEA4387404 | SAMEA4387404 | ERR1789105 | GCA 015579035.1 | N/A |
| PDT000811536.1 | SAMEA4387157 | SAMEA4387157 | ERR1789106 | GCA 015578975.1 | N/A |
| PDT000811537.1 | SAMEA4387615 | SAMEA4387615 | ERR1789107 | GCA 015578905.1 | N/A |
| PDT000811538.1 | SAMEA4387158 | SAMEA4387158 | ERR1789108 | GCA 015578875.1 | N/A |
| PDT000811539.1 | SAMEA4387405 | SAMEA4387405 | ERR1789109 | GCA 015578955.1 | N/A |
| PDT000811540.1 | SAMEA4387159 | SAMEA4387159 | ERR1789110 | GCA 015578895.1 | N/A |
| PDT000811541.1 | SAMEA4387527 | SAMEA4387527 | ERR1789111 | GCA 015578935.1 | N/A |
| PDT000811542.1 | SAMEA4387160 | SAMEA4387160 | ERR1789112 | GCA 015578855.1 | N/A |
| PDT000811543.1 | SAMEA4387406 | SAMEA4387406 | ERR1789113 | GCA 015577955.1 | N/A |
| PDT000811544.1 | SAMEA4387161 | SAMEA4387161 | ERR1789114 | GCA 015579955.1 | N/A |
| PDT000811545.1 | SAMEA4387681 | SAMEA4387681 | ERR1789115 | GCA 015578635.1 | N/A |
| PDT000811546.1 | SAMEA4387162 | SAMEA4387162 | ERR1789116 | GCA 015578695.1 | N/A |
| PDT000811548.1 | SAMEA4387163 | SAMEA4387163 | ERR1789118 | GCA 015578445.1 | N/A |
| PDT000811549.1 | SAMEA4387528 | SAMEA4387528 | ERR1789119 | GCA 015578335.1 | N/A |
| PDT000811550.1 | SAMEA4387164 | SAMEA4387164 | ERR1789120 | GCA 015577635.1 | N/A |
| PDT000811551.1 | SAMEA4387408 | SAMEA4387408 | ERR1789121 | GCA 015577975.1 | N/A |
| PDT000811552.1 | SAMEA4387165 | SAMEA4387165 | ERR1789122 | GCA 015578475.1 | N/A |
| PDT000811553.1 | SAMEA4387616 | SAMEA4387616 | ERR1789123 | GCA 015577935.1 | N/A |
| PDT000811554.1 | SAMEA4387166 | SAMEA4387166 | ERR1789124 | GCA 015577875.1 | N/A |
| PDT000811555.1 | SAMEA4387409 | SAMEA4387409 | ERR1789125 | GCA 015577775.1 | N/A |
| PDT000811556.1 | SAMEA4387167 | SAMEA4387167 | ERR1789126 | GCA 015577915.1 | N/A |
| PDT000811557.1 | SAMEA4387529 | SAMEA4387529 | ERR1789127 | GCA 015577895.1 | N/A |
| PDT000811558.1 | SAMEA4387168 | SAMEA4387168 | ERR1789128 | GCA 015577835.1 | N/A |

|                |              |              |            |                 |     |
|----------------|--------------|--------------|------------|-----------------|-----|
| PDT000811559.1 | SAMEA4387410 | SAMEA4387410 | ERR1789129 | GCA 015577855.1 | N/A |
| PDT000811560.1 | SAMEA4387169 | SAMEA4387169 | ERR1789130 | GCA 015577755.1 | N/A |
| PDT000811561.1 | SAMEA4387714 | SAMEA4387714 | ERR1789131 | GCA 015577815.1 | N/A |
| PDT000811562.1 | SAMEA4387170 | SAMEA4387170 | ERR1789132 | GCA 015577795.1 | N/A |
| PDT000811563.1 | SAMEA4387411 | SAMEA4387411 | ERR1789133 | GCA 015577655.1 | N/A |
| PDT000811565.1 | SAMEA4387530 | SAMEA4387530 | ERR1789135 | GCA 015577685.1 | N/A |
| PDT000811566.1 | SAMEA4387172 | SAMEA4387172 | ERR1789136 | GCA 015577675.1 | N/A |
| PDT000811568.1 | SAMEA4387173 | SAMEA4387173 | ERR1789138 | GCA 015577715.1 | N/A |
| PDT000811569.1 | SAMEA4387617 | SAMEA4387617 | ERR1789139 | GCA 015577555.1 | N/A |
| PDT000811570.1 | SAMEA4387174 | SAMEA4387174 | ERR1789140 | GCA 015577535.1 | N/A |
| PDT000811571.1 | SAMEA4387413 | SAMEA4387413 | ERR1789141 | GCA 015577545.1 | N/A |
| PDT000811572.1 | SAMEA4387175 | SAMEA4387175 | ERR1789142 | GCA 015577565.1 | N/A |
| PDT000811574.1 | SAMEA4387176 | SAMEA4387176 | ERR1789144 | GCA 015577495.1 | N/A |
| PDT000811575.1 | SAMEA4387414 | SAMEA4387414 | ERR1789145 | GCA 015577455.1 | N/A |
| PDT000811576.1 | SAMEA4387177 | SAMEA4387177 | ERR1789146 | GCA 015577475.1 | N/A |
| PDT000811577.1 | SAMEA4387682 | SAMEA4387682 | ERR1789147 | GCA 015578835.1 | N/A |
| PDT000811578.1 | SAMEA4387178 | SAMEA4387178 | ERR1789148 | GCA 015578795.1 | N/A |
| PDT000811579.1 | SAMEA4387415 | SAMEA4387415 | ERR1789149 | GCA 015578755.1 | N/A |
| PDT000811582.1 | SAMEA4387180 | SAMEA4387180 | ERR1789152 | GCA 015578815.1 | N/A |
| PDT000811583.1 | SAMEA4387416 | SAMEA4387416 | ERR1789153 | GCA 015578775.1 | N/A |
| PDT000811584.1 | SAMEA4387181 | SAMEA4387181 | ERR1789154 | GCA 015577355.1 | N/A |
| PDT000811586.1 | SAMEA4387182 | SAMEA4387182 | ERR1789156 | GCA 015578655.1 | N/A |
| PDT000811587.1 | SAMEA4387417 | SAMEA4387417 | ERR1789157 | GCA 015578355.1 | N/A |
| PDT000811589.1 | SAMEA4387533 | SAMEA4387533 | ERR1789159 | GCA 015578535.1 | N/A |
| PDT000811590.1 | SAMEA4387184 | SAMEA4387184 | ERR1789160 | GCA 015578295.1 | N/A |
| PDT000811591.1 | SAMEA4387418 | SAMEA4387418 | ERR1789161 | GCA 015578275.1 | N/A |
| PDT000811592.1 | SAMEA4387185 | SAMEA4387185 | ERR1789162 | GCA 015578575.1 | N/A |
| PDT000811593.1 | SAMEA4387736 | SAMEA4387736 | ERR1789163 | GCA 015578675.1 | N/A |
| PDT000811594.1 | SAMEA4387186 | SAMEA4387186 | ERR1789164 | GCA 015578515.1 | N/A |
| PDT000811596.1 | SAMEA4387187 | SAMEA4387187 | ERR1789166 | GCA 015578255.1 | N/A |
| PDT000811598.1 | SAMEA4387188 | SAMEA4387188 | ERR1789168 | GCA 015578375.1 | N/A |
| PDT000811599.1 | SAMEA4387420 | SAMEA4387420 | ERR1789169 | GCA 015578315.1 | N/A |
| PDT000811601.1 | SAMEA4387619 | SAMEA4387619 | ERR1789171 | GCA 015578495.1 | N/A |
| PDT000811603.1 | SAMEA4387421 | SAMEA4387421 | ERR1789173 | GCA 015578415.1 | N/A |
| PDT000811604.1 | SAMEA4387191 | SAMEA4387191 | ERR1789174 | GCA 015578725.1 | N/A |
| PDT000811605.1 | SAMEA4387535 | SAMEA4387535 | ERR1789175 | GCA 015578235.1 | N/A |
| PDT000811606.1 | SAMEA4387192 | SAMEA4387192 | ERR1789176 | GCA 015577295.1 | N/A |
| PDT000811607.1 | SAMEA4387422 | SAMEA4387422 | ERR1789177 | GCA 015577395.1 | N/A |
| PDT000811609.1 | SAMEA4387683 | SAMEA4387683 | ERR1789179 | GCA 015577435.1 | N/A |
| PDT000811610.1 | SAMEA4387194 | SAMEA4387194 | ERR1789180 | GCA 015578195.1 | N/A |
| PDT000811611.1 | SAMEA4387423 | SAMEA4387423 | ERR1789181 | GCA 015577415.1 | N/A |
| PDT000811612.1 | SAMEA4387195 | SAMEA4387195 | ERR1789182 | GCA 015578155.1 | N/A |
| PDT000811613.1 | SAMEA4387536 | SAMEA4387536 | ERR1789183 | GCA 015578135.1 | N/A |
| PDT000811614.1 | SAMEA4387196 | SAMEA4387196 | ERR1789184 | GCA 015578045.1 | N/A |
| PDT000811615.1 | SAMEA4387424 | SAMEA4387424 | ERR1789185 | GCA 015578175.1 | N/A |
| PDT000811616.1 | SAMEA4387197 | SAMEA4387197 | ERR1789186 | GCA 015578095.1 | N/A |
| PDT000811617.1 | SAMEA4387620 | SAMEA4387620 | ERR1789187 | GCA 015578115.1 | N/A |
| PDT000811618.1 | SAMEA4387198 | SAMEA4387198 | ERR1789188 | GCA 015578035.1 | N/A |
| PDT000811619.1 | SAMEA4387425 | SAMEA4387425 | ERR1789189 | GCA 015578075.1 | N/A |
| PDT000811620.1 | SAMEA4387199 | SAMEA4387199 | ERR1789190 | GCA 015578005.1 | N/A |
| PDT000811621.1 | SAMEA4387537 | SAMEA4387537 | ERR1789191 | GCA 015577315.1 | N/A |
| PDT000811622.1 | SAMEA4387200 | SAMEA4387200 | ERR1789192 | GCA 015577995.1 | N/A |
| PDT000811623.1 | SAMEA4387426 | SAMEA4387426 | ERR1789193 | GCA 015577265.1 | N/A |
| PDT000811624.1 | SAMEA4387201 | SAMEA4387201 | ERR1789194 | GCA 015577155.1 | N/A |
| PDT000811625.1 | SAMEA4387715 | SAMEA4387715 | ERR1789195 | GCA 015577175.1 | N/A |
| PDT000811626.1 | SAMEA4387202 | SAMEA4387202 | ERR1789196 | GCA 015577255.1 | N/A |
| PDT000811627.1 | SAMEA4387427 | SAMEA4387427 | ERR1789197 | GCA 015577185.1 | N/A |
| PDT000811630.1 | SAMEA4387204 | SAMEA4387204 | ERR1789200 | GCA 015576585.1 | N/A |
| PDT000811631.1 | SAMEA4387428 | SAMEA4387428 | ERR1789201 | GCA 015576455.1 | N/A |
| PDT000811632.1 | SAMEA4387205 | SAMEA4387205 | ERR1789202 | GCA 015576555.1 | N/A |
| PDT000811634.1 | SAMEA4387206 | SAMEA4387206 | ERR1789204 | GCA 015576055.1 | N/A |
| PDT000811638.1 | SAMEA4387208 | SAMEA4387208 | ERR1789208 | GCA 015576715.1 | N/A |
| PDT000811639.1 | SAMEA4387430 | SAMEA4387430 | ERR1789209 | GCA 015576735.1 | N/A |
| PDT000811640.1 | SAMEA4387209 | SAMEA4387209 | ERR1789210 | GCA 015577075.1 | N/A |
| PDT000811642.1 | SAMEA4387210 | SAMEA4387210 | ERR1789212 | GCA 015577135.1 | N/A |
| PDT000811643.1 | SAMEA4387431 | SAMEA4387431 | ERR1789213 | GCA 015576695.1 | N/A |
| PDT000811644.1 | SAMEA4387211 | SAMEA4387211 | ERR1789214 | GCA 015577115.1 | N/A |
| PDT000811645.1 | SAMEA4387540 | SAMEA4387540 | ERR1789215 | GCA 015577055.1 | N/A |

|                |              |              |            |                 |     |
|----------------|--------------|--------------|------------|-----------------|-----|
| PDT000811646.1 | SAMEA4387212 | SAMEA4387212 | ERR1789216 | GCA 015577095.1 | N/A |
| PDT000811647.1 | SAMEA4387432 | SAMEA4387432 | ERR1789217 | GCA 015576755.1 | N/A |
| PDT000811648.1 | SAMEA4387213 | SAMEA4387213 | ERR1789218 | GCA 015576615.1 | N/A |
| PDT000811649.1 | SAMEA4387622 | SAMEA4387622 | ERR1789219 | GCA 015576635.1 | N/A |
| PDT000811650.1 | SAMEA4387214 | SAMEA4387214 | ERR1789220 | GCA 015576575.1 | N/A |
| PDT000811651.1 | SAMEA4387433 | SAMEA4387433 | ERR1789221 | GCA 015575975.1 | N/A |
| PDT000811652.1 | SAMEA4387215 | SAMEA4387215 | ERR1789222 | GCA 015576515.1 | N/A |
| PDT000811653.1 | SAMEA4387541 | SAMEA4387541 | ERR1789223 | GCA 015576535.1 | N/A |
| PDT000811654.1 | SAMEA4387216 | SAMEA4387216 | ERR1789224 | GCA 015576475.1 | N/A |
| PDT000811655.1 | SAMEA4387434 | SAMEA4387434 | ERR1789225 | GCA 015576495.1 | N/A |
| PDT000811657.1 | SAMEA4387730 | SAMEA4387730 | ERR1789227 | GCA 015576415.1 | N/A |
| PDT000811658.1 | SAMEA4387218 | SAMEA4387218 | ERR1789228 | GCA 015576395.1 | N/A |
| PDT000811659.1 | SAMEA4387435 | SAMEA4387435 | ERR1789229 | GCA 015576375.1 | N/A |
| PDT000811660.1 | SAMEA4387219 | SAMEA4387219 | ERR1789230 | GCA 015576355.1 | N/A |
| PDT000811661.1 | SAMEA4387542 | SAMEA4387542 | ERR1789231 | GCA 015576315.1 | N/A |
| PDT000811662.1 | SAMEA4387220 | SAMEA4387220 | ERR1789232 | GCA 015576335.1 | N/A |
| PDT000811663.1 | SAMEA4387221 | SAMEA4387221 | ERR1789233 | GCA 015576235.1 | N/A |
| PDT000811665.1 | SAMEA4387222 | SAMEA4387222 | ERR1789235 | GCA 015576295.1 | N/A |
| PDT000811666.1 | SAMEA4387437 | SAMEA4387437 | ERR1789236 | GCA 015576215.1 | N/A |
| PDT000811667.1 | SAMEA4387223 | SAMEA4387223 | ERR1789237 | GCA 015576245.1 | N/A |
| PDT000811669.1 | SAMEA4387224 | SAMEA4387224 | ERR1789239 | GCA 015576175.1 | N/A |
| PDT000811670.1 | SAMEA4387438 | SAMEA4387438 | ERR1789240 | GCA 015576095.1 | N/A |
| PDT000811671.1 | SAMEA4387225 | SAMEA4387225 | ERR1789241 | GCA 015576065.1 | N/A |
| PDT000811672.1 | SAMEA4387685 | SAMEA4387685 | ERR1789242 | GCA 015576135.1 | N/A |
| PDT000811673.1 | SAMEA4387226 | SAMEA4387226 | ERR1789243 | GCA 015575905.1 | N/A |
| PDT000811674.1 | SAMEA4387439 | SAMEA4387439 | ERR1789244 | GCA 015575835.1 | N/A |
| PDT000811675.1 | SAMEA4387227 | SAMEA4387227 | ERR1789245 | GCA 015575855.1 | N/A |
| PDT000811676.1 | SAMEA4387544 | SAMEA4387544 | ERR1789246 | GCA 015575815.1 | N/A |
| PDT000811677.1 | SAMEA4387228 | SAMEA4387228 | ERR1789247 | GCA 015575995.1 | N/A |
| PDT000811678.1 | SAMEA4387440 | SAMEA4387440 | ERR1789248 | GCA 015576025.1 | N/A |
| PDT000811679.1 | SAMEA4387229 | SAMEA4387229 | ERR1789249 | GCA 015575895.1 | N/A |
| PDT000811680.1 | SAMEA4387624 | SAMEA4387624 | ERR1789250 | GCA 015575955.1 | N/A |
| PDT000811681.1 | SAMEA4387230 | SAMEA4387230 | ERR1789251 | GCA 015575795.1 | N/A |
| PDT000811682.1 | SAMEA4387441 | SAMEA4387441 | ERR1789252 | GCA 015576015.1 | N/A |
| PDT000811684.1 | SAMEA4387545 | SAMEA4387545 | ERR1789254 | GCA 015575935.1 | N/A |
| PDT000811685.1 | SAMEA4387232 | SAMEA4387232 | ERR1789255 | GCA 015577035.1 | N/A |
| PDT000811686.1 | SAMEA4387442 | SAMEA4387442 | ERR1789256 | GCA 015576915.1 | N/A |
| PDT000811687.1 | SAMEA4387233 | SAMEA4387233 | ERR1789257 | GCA 015576975.1 | N/A |
| PDT000811688.1 | SAMEA4387716 | SAMEA4387716 | ERR1789258 | GCA 015576955.1 | N/A |
| PDT000811689.1 | SAMEA4387234 | SAMEA4387234 | ERR1789259 | GCA 015576935.1 | N/A |
| PDT000811690.1 | SAMEA4387443 | SAMEA4387443 | ERR1789260 | GCA 015576995.1 | N/A |
| PDT000811691.1 | SAMEA4387235 | SAMEA4387235 | ERR1789261 | GCA 015576875.1 | N/A |
| PDT000811692.1 | SAMEA4387546 | SAMEA4387546 | ERR1789262 | GCA 015576895.1 | N/A |
| PDT000811693.1 | SAMEA4387236 | SAMEA4387236 | ERR1789263 | GCA 015576855.1 | N/A |
| PDT000811694.1 | SAMEA4387444 | SAMEA4387444 | ERR1789264 | GCA 015576835.1 | N/A |
| PDT000811695.1 | SAMEA4387237 | SAMEA4387237 | ERR1789265 | GCA 015575735.1 | N/A |
| PDT000811696.1 | SAMEA4387625 | SAMEA4387625 | ERR1789266 | GCA 015575755.1 | N/A |
| PDT000811697.1 | SAMEA4387238 | SAMEA4387238 | ERR1789267 | GCA 015576795.1 | N/A |
| PDT000811698.1 | SAMEA4387445 | SAMEA4387445 | ERR1789268 | GCA 015576815.1 | N/A |
| PDT000811699.1 | SAMEA4387239 | SAMEA4387239 | ERR1789269 | GCA 015575715.1 | N/A |
| PDT000811700.1 | SAMEA4387547 | SAMEA4387547 | ERR1789270 | GCA 015575695.1 | N/A |
| PDT000811701.1 | SAMEA4387240 | SAMEA4387240 | ERR1789271 | GCA 015575775.1 | N/A |
| PDT000811702.1 | SAMEA4387446 | SAMEA4387446 | ERR1789272 | GCA 015576775.1 | N/A |
| PDT000811703.1 | SAMEA4387241 | SAMEA4387241 | ERR1789273 | GCA 015574515.1 | N/A |
| PDT000811704.1 | SAMEA4387686 | SAMEA4387686 | ERR1789274 | GCA 015575235.1 | N/A |
| PDT000811705.1 | SAMEA4387242 | SAMEA4387242 | ERR1789275 | GCA 015575635.1 | N/A |
| PDT000811706.1 | SAMEA4387447 | SAMEA4387447 | ERR1789276 | GCA 015575575.1 | N/A |
| PDT000811708.1 | SAMEA4387548 | SAMEA4387548 | ERR1789278 | GCA 015575555.1 | N/A |
| PDT000811710.1 | SAMEA4387448 | SAMEA4387448 | ERR1789280 | GCA 015575535.1 | N/A |
| PDT000811711.1 | SAMEA4387245 | SAMEA4387245 | ERR1789281 | GCA 015575615.1 | N/A |
| PDT000811712.1 | SAMEA4387626 | SAMEA4387626 | ERR1789282 | GCA 015575515.1 | N/A |
| PDT000811713.1 | SAMEA4387246 | SAMEA4387246 | ERR1789283 | GCA 015575495.1 | N/A |
| PDT000811715.1 | SAMEA4387247 | SAMEA4387247 | ERR1789285 | GCA 015574855.1 | N/A |
| PDT000811716.1 | SAMEA4387549 | SAMEA4387549 | ERR1789286 | GCA 015574895.1 | N/A |
| PDT000811717.1 | SAMEA4387248 | SAMEA4387248 | ERR1789287 | GCA 015574835.1 | N/A |
| PDT000811719.1 | SAMEA4387743 | SAMEA4387743 | ERR1789289 | GCA 015574775.1 | N/A |
| PDT000811720.1 | SAMEA4387250 | SAMEA4387250 | ERR1789290 | GCA 015574755.1 | N/A |
| PDT000811721.1 | SAMEA4387451 | SAMEA4387451 | ERR1789291 | GCA 015574815.1 | N/A |

|                |              |              |            |                 |     |
|----------------|--------------|--------------|------------|-----------------|-----|
| PDT000811722.1 | SAMEA4387251 | SAMEA4387251 | ERR1789292 | GCA 015574735.1 | N/A |
| PDT000811723.1 | SAMEA4387550 | SAMEA4387550 | ERR1789293 | GCA 015574695.1 | N/A |
| PDT000811724.1 | SAMEA4387252 | SAMEA4387252 | ERR1789294 | GCA 015574715.1 | N/A |
| PDT000811726.1 | SAMEA4387253 | SAMEA4387253 | ERR1789296 | GCA 015574635.1 | N/A |
| PDT000811727.1 | SAMEA4387627 | SAMEA4387627 | ERR1789297 | GCA 015574605.1 | N/A |
| PDT000811728.1 | SAMEA4387254 | SAMEA4387254 | ERR1789298 | GCA 015574675.1 | N/A |
| PDT000811729.1 | SAMEA4387453 | SAMEA4387453 | ERR1789299 | GCA 015574555.1 | N/A |
| PDT000811730.1 | SAMEA4387255 | SAMEA4387255 | ERR1789300 | GCA 015574575.1 | N/A |
| PDT000811731.1 | SAMEA4387551 | SAMEA4387551 | ERR1789301 | GCA 015574585.1 | N/A |
| PDT000811732.1 | SAMEA4387256 | SAMEA4387256 | ERR1789302 | GCA 015574495.1 | N/A |
| PDT000811733.1 | SAMEA4387454 | SAMEA4387454 | ERR1789303 | GCA 015574535.1 | N/A |
| PDT000811734.1 | SAMEA4387257 | SAMEA4387257 | ERR1789304 | GCA 015574935.1 | N/A |
| PDT000811736.1 | SAMEA4387258 | SAMEA4387258 | ERR1789306 | GCA 015575395.1 | N/A |
| PDT000811737.1 | SAMEA4387455 | SAMEA4387455 | ERR1789307 | GCA 015575355.1 | N/A |
| PDT000811739.1 | SAMEA4387552 | SAMEA4387552 | ERR1789309 | GCA 015575455.1 | N/A |
| PDT000811741.1 | SAMEA4387456 | SAMEA4387456 | ERR1789311 | GCA 015574475.1 | N/A |
| PDT000811742.1 | SAMEA4387261 | SAMEA4387261 | ERR1789312 | GCA 015575135.1 | N/A |
| PDT000811745.1 | SAMEA4387457 | SAMEA4387457 | ERR1789315 | GCA 015575095.1 | N/A |
| PDT000811746.1 | SAMEA4387263 | SAMEA4387263 | ERR1789316 | GCA 015575155.1 | N/A |
| PDT000811747.1 | SAMEA4387553 | SAMEA4387553 | ERR1789317 | GCA 015575255.1 | N/A |
| PDT000811748.1 | SAMEA4387264 | SAMEA4387264 | ERR1789318 | GCA 015575195.1 | N/A |
| PDT000811750.1 | SAMEA4387265 | SAMEA4387265 | ERR1789320 | GCA 015573955.1 | N/A |
| PDT000811751.1 | SAMEA4387717 | SAMEA4387717 | ERR1789321 | GCA 015575115.1 | N/A |
| PDT000811752.1 | SAMEA4387266 | SAMEA4387266 | ERR1789322 | GCA 015574315.1 | N/A |
| PDT000811754.1 | SAMEA4387267 | SAMEA4387267 | ERR1789324 | GCA 015573385.1 | N/A |
| PDT000811755.1 | SAMEA4387554 | SAMEA4387554 | ERR1789325 | GCA 015573795.1 | N/A |
| PDT000811756.1 | SAMEA4387268 | SAMEA4387268 | ERR1789326 | GCA 015574055.1 | N/A |
| PDT000811757.1 | SAMEA4387460 | SAMEA4387460 | ERR1789327 | GCA 015573855.1 | N/A |
| PDT000811758.1 | SAMEA4387269 | SAMEA4387269 | ERR1789328 | GCA 015573595.1 | N/A |
| PDT000811759.1 | SAMEA4387629 | SAMEA4387629 | ERR1789329 | GCA 015573275.1 | N/A |
| PDT000811760.1 | SAMEA4387270 | SAMEA4387270 | ERR1789330 | GCA 015574215.1 | N/A |
| PDT000811761.1 | SAMEA4387461 | SAMEA4387461 | ERR1789331 | GCA 015575015.1 | N/A |
| PDT000811762.1 | SAMEA4387271 | SAMEA4387271 | ERR1789332 | GCA 015573635.1 | N/A |
| PDT000811764.1 | SAMEA4387272 | SAMEA4387272 | ERR1789334 | GCA 015573615.1 | N/A |
| PDT000811765.1 | SAMEA4387462 | SAMEA4387462 | ERR1789335 | GCA 015573575.1 | N/A |
| PDT000811766.1 | SAMEA4387273 | SAMEA4387273 | ERR1789336 | GCA 015573495.1 | N/A |
| PDT000811767.1 | SAMEA4387688 | SAMEA4387688 | ERR1789337 | GCA 015573455.1 | N/A |
| PDT000811768.1 | SAMEA4387274 | SAMEA4387274 | ERR1789338 | GCA 015574995.1 | N/A |
| PDT000811769.1 | SAMEA4387463 | SAMEA4387463 | ERR1789339 | GCA 015575075.1 | N/A |
| PDT000811771.1 | SAMEA4387556 | SAMEA4387556 | ERR1789341 | GCA 015575275.1 | N/A |
| PDT000811772.1 | SAMEA4387276 | SAMEA4387276 | ERR1789342 | GCA 015575305.1 | N/A |
| PDT000811773.1 | SAMEA4387464 | SAMEA4387464 | ERR1789343 | GCA 015575675.1 | N/A |
| PDT000811777.1 | SAMEA4387465 | SAMEA4387465 | ERR1789347 | GCA 015574955.1 | N/A |
| PDT000811778.1 | SAMEA4387279 | SAMEA4387279 | ERR1789348 | GCA 015574975.1 | N/A |
| PDT000811779.1 | SAMEA4387557 | SAMEA4387557 | ERR1789349 | GCA 015575475.1 | N/A |
| PDT000811780.1 | SAMEA4387280 | SAMEA4387280 | ERR1789350 | GCA 015575415.1 | N/A |
| PDT000811781.1 | SAMEA4387466 | SAMEA4387466 | ERR1789351 | GCA 015573535.1 | N/A |
| PDT000811782.1 | SAMEA4387281 | SAMEA4387281 | ERR1789352 | GCA 015573515.1 | N/A |
| PDT000811783.1 | SAMEA4387731 | SAMEA4387731 | ERR1789353 | GCA 015573555.1 | N/A |
| PDT000811784.1 | SAMEA4387282 | SAMEA4387282 | ERR1789354 | GCA 015573475.1 | N/A |
| PDT000811785.1 | SAMEA4387467 | SAMEA4387467 | ERR1789355 | GCA 015573415.1 | N/A |
| PDT000811786.1 | SAMEA4387283 | SAMEA4387283 | ERR1789356 | GCA 015573315.1 | N/A |
| PDT000811787.1 | SAMEA4387558 | SAMEA4387558 | ERR1789357 | GCA 015573375.1 | N/A |
| PDT000811788.1 | SAMEA4387284 | SAMEA4387284 | ERR1789358 | GCA 015573425.1 | N/A |
| PDT000811789.1 | SAMEA4387468 | SAMEA4387468 | ERR1789359 | GCA 015573295.1 | N/A |
| PDT000811791.1 | SAMEA4387631 | SAMEA4387631 | ERR1789361 | GCA 015573335.1 | N/A |
| PDT000811792.1 | SAMEA4387286 | SAMEA4387286 | ERR1789362 | GCA 015574295.1 | N/A |
| PDT000811793.1 | SAMEA4387469 | SAMEA4387469 | ERR1789363 | GCA 015574275.1 | N/A |
| PDT000811794.1 | SAMEA4387287 | SAMEA4387287 | ERR1789364 | GCA 015574235.1 | N/A |
| PDT000811795.1 | SAMEA4387559 | SAMEA4387559 | ERR1789365 | GCA 015574255.1 | N/A |
| PDT000811796.1 | SAMEA4387288 | SAMEA4387288 | ERR1789366 | GCA 015574195.1 | N/A |
| PDT000811797.1 | SAMEA4387470 | SAMEA4387470 | ERR1789367 | GCA 015574175.1 | N/A |
| PDT000811799.1 | SAMEA4387689 | SAMEA4387689 | ERR1789369 | GCA 015574155.1 | N/A |
| PDT000811800.1 | SAMEA4387290 | SAMEA4387290 | ERR1789370 | GCA 015574115.1 | N/A |
| PDT000811801.1 | SAMEA4387471 | SAMEA4387471 | ERR1789371 | GCA 015574095.1 | N/A |
| PDT000811802.1 | SAMEA4387291 | SAMEA4387291 | ERR1789372 | GCA 015574015.1 | N/A |
| PDT000811803.1 | SAMEA4387560 | SAMEA4387560 | ERR1789373 | GCA 015574035.1 | N/A |
| PDT000811804.1 | SAMEA4387292 | SAMEA4387292 | ERR1789374 | GCA 015573995.1 | N/A |

|                |              |              |            |                 |     |
|----------------|--------------|--------------|------------|-----------------|-----|
| PDT000811805.1 | SAMEA4387472 | SAMEA4387472 | ERR1789375 | GCA 015573975.1 | N/A |
| PDT000811806.1 | SAMEA4387293 | SAMEA4387293 | ERR1789376 | GCA 015573895.1 | N/A |
| PDT000811807.1 | SAMEA4387632 | SAMEA4387632 | ERR1789377 | GCA 015573925.1 | N/A |
| PDT000811808.1 | SAMEA4387294 | SAMEA4387294 | ERR1789378 | GCA 015573915.1 | N/A |
| PDT000811809.1 | SAMEA4387473 | SAMEA4387473 | ERR1789379 | GCA 015573875.1 | N/A |
| PDT000811810.1 | SAMEA4387295 | SAMEA4387295 | ERR1789380 | GCA 015573835.1 | N/A |
| PDT000811811.1 | SAMEA4387561 | SAMEA4387561 | ERR1789381 | GCA 015573815.1 | N/A |
| PDT000811812.1 | SAMEA4387296 | SAMEA4387296 | ERR1789382 | GCA 015573775.1 | N/A |
| PDT000811813.1 | SAMEA4387474 | SAMEA4387474 | ERR1789383 | GCA 015573735.1 | N/A |
| PDT000811814.1 | SAMEA4387297 | SAMEA4387297 | ERR1789384 | GCA 015573755.1 | N/A |
| PDT000811815.1 | SAMEA4387718 | SAMEA4387718 | ERR1789385 | GCA 015573715.1 | N/A |
| PDT000811816.1 | SAMEA4387298 | SAMEA4387298 | ERR1789386 | GCA 015573675.1 | N/A |
| PDT000811817.1 | SAMEA4387475 | SAMEA4387475 | ERR1789387 | GCA 015573695.1 | N/A |
| PDT000811818.1 | SAMEA4387299 | SAMEA4387299 | ERR1789388 | GCA 015574415.1 | N/A |
| PDT000811819.1 | SAMEA4387562 | SAMEA4387562 | ERR1789389 | GCA 015574375.1 | N/A |
| PDT000811820.1 | SAMEA4387300 | SAMEA4387300 | ERR1789390 | GCA 015574395.1 | N/A |
| PDT000811821.1 | SAMEA4387476 | SAMEA4387476 | ERR1789391 | GCA 015574435.1 | N/A |
| PDT000811822.1 | SAMEA4387301 | SAMEA4387301 | ERR1789392 | GCA 015574335.1 | N/A |
| PDT000811823.1 | SAMEA4387633 | SAMEA4387633 | ERR1789393 | GCA 015574355.1 | N/A |
| PDT000811824.1 | SAMEA4387302 | SAMEA4387302 | ERR1789394 | GCA 015575655.1 | N/A |
| PDT000811826.1 | SAMEA4387303 | SAMEA4387303 | ERR1789396 | GCA 015573215.1 | N/A |
| PDT000811827.1 | SAMEA4387563 | SAMEA4387563 | ERR1789397 | GCA 015573195.1 | N/A |
| PDT000811828.1 | SAMEA4387304 | SAMEA4387304 | ERR1789398 | GCA 015573225.1 | N/A |
| PDT000811829.1 | SAMEA4387478 | SAMEA4387478 | ERR1789399 | GCA 015573175.1 | N/A |
| PDT000811831.1 | SAMEA4387690 | SAMEA4387690 | ERR1795519 | GCA 015573135.1 | N/A |
| PDT000811833.1 | SAMEA4387479 | SAMEA4387479 | ERR1795521 | GCA 015573095.1 | N/A |
| PDT000811834.1 | SAMEA4387307 | SAMEA4387307 | ERR1795522 | GCA 015573115.1 | N/A |
| PDT000811835.1 | SAMEA4387564 | SAMEA4387564 | ERR1795523 | GCA 015573055.1 | N/A |
| PDT000811836.1 | SAMEA4387308 | SAMEA4387308 | ERR1795524 | GCA 015573035.1 | N/A |
| PDT000811837.1 | SAMEA4387480 | SAMEA4387480 | ERR1795525 | GCA 015572955.1 | N/A |
| PDT000811838.1 | SAMEA4387309 | SAMEA4387309 | ERR1795526 | GCA 015573015.1 | N/A |
| PDT000811840.1 | SAMEA4387310 | SAMEA4387310 | ERR1795528 | GCA 015572995.1 | N/A |
| PDT000811841.1 | SAMEA4387481 | SAMEA4387481 | ERR1795529 | GCA 015572875.1 | N/A |
| PDT000811842.1 | SAMEA4387311 | SAMEA4387311 | ERR1795530 | GCA 015572895.1 | N/A |
| PDT000811843.1 | SAMEA4387565 | SAMEA4387565 | ERR1795531 | GCA 015572855.1 | N/A |
| PDT000811844.1 | SAMEA4387312 | SAMEA4387312 | ERR1795532 | GCA 015572935.1 | N/A |
| PDT000811846.1 | SAMEA4387313 | SAMEA4387313 | ERR1795534 | GCA 015572915.1 | N/A |
| PDT000811848.1 | SAMEA4387314 | SAMEA4387314 | ERR1795536 | GCA 015572815.1 | N/A |
| PDT000811849.1 | SAMEA4387483 | SAMEA4387483 | ERR1795537 | GCA 015572765.1 | N/A |
| PDT000811850.1 | SAMEA4387315 | SAMEA4387315 | ERR1795538 | GCA 015572735.1 | N/A |
| PDT000811853.1 | SAMEA4387484 | SAMEA4387484 | ERR1795541 | GCA 015572415.1 | N/A |
| PDT000811854.1 | SAMEA4387317 | SAMEA4387317 | ERR1795542 | GCA 015572675.1 | N/A |
| PDT000811855.1 | SAMEA4387635 | SAMEA4387635 | ERR1795543 | GCA 015572655.1 | N/A |
| PDT000811856.1 | SAMEA4387318 | SAMEA4387318 | ERR1795544 | GCA 015572695.1 | N/A |
| PDT000811857.1 | SAMEA4387485 | SAMEA4387485 | ERR1795545 | GCA 015572635.1 | N/A |
| PDT000811858.1 | SAMEA4387319 | SAMEA4387319 | ERR1795546 | GCA 015572615.1 | N/A |
| PDT000811859.1 | SAMEA4387567 | SAMEA4387567 | ERR1795547 | GCA 015572575.1 | N/A |
| PDT000811861.1 | SAMEA4387486 | SAMEA4387486 | ERR1795549 | GCA 015572595.1 | N/A |
| PDT000811862.1 | SAMEA4387321 | SAMEA4387321 | ERR1795550 | GCA 015572515.1 | N/A |
| PDT000811863.1 | SAMEA4387691 | SAMEA4387691 | ERR1795551 | GCA 015572495.1 | N/A |
| PDT000811864.1 | SAMEA4387322 | SAMEA4387322 | ERR1795552 | GCA 015572535.1 | N/A |
| PDT000811865.1 | SAMEA4387487 | SAMEA4387487 | ERR1795553 | GCA 015572465.1 | N/A |
| PDT000811866.1 | SAMEA4387323 | SAMEA4387323 | ERR1795554 | GCA 015572435.1 | N/A |
| PDT000811868.1 | SAMEA4387488 | SAMEA4387488 | ERR1795557 | GCA 015572455.1 | N/A |
| PDT000811870.1 | SAMEA4387636 | SAMEA4387636 | ERR1795559 | GCA 015572395.1 | N/A |
| PDT000811871.1 | SAMEA4387489 | SAMEA4387489 | ERR1795561 | GCA 015572315.1 | N/A |
| PDT000811873.1 | SAMEA4387569 | SAMEA4387569 | ERR1795563 | GCA 015572335.1 | N/A |
| PDT000812711.1 | SAMN10038910 | SAMN10038910 | SRR7839381 | GCA 015571455.1 | N/A |
| PDT000812712.1 | SAMN10038911 | SAMN10038911 | SRR7839382 | GCA 015571355.1 | N/A |
| PDT000812713.1 | SAMN10038908 | SAMN10038908 | SRR7839383 | GCA 015571335.1 | N/A |
| PDT000812714.1 | SAMN10038909 | SAMN10038909 | SRR7839384 | GCA 015571295.1 | N/A |
| PDT000812715.1 | SAMN10038914 | SAMN10038914 | SRR7839385 | GCA 015571315.1 | N/A |
| PDT000812716.1 | SAMN10038915 | SAMN10038915 | SRR7839386 | GCA 015571275.1 | N/A |
| PDT000812718.1 | SAMN10038913 | SAMN10038913 | SRR7839388 | GCA 015571235.1 | N/A |
| PDT000812720.1 | SAMN10038777 | SAMN10038777 | SRR7839390 | GCA 015570335.1 | N/A |
| PDT000812721.1 | SAMN10038916 | SAMN10038916 | SRR7839391 | GCA 015571195.1 | N/A |
| PDT000812722.1 | SAMN10038917 | SAMN10038917 | SRR7839392 | GCA 015570715.1 | N/A |
| PDT000812723.1 | SAMN10038896 | SAMN10038896 | SRR7839407 | GCA 015571135.1 | N/A |

|                |              |              |            |                 |     |
|----------------|--------------|--------------|------------|-----------------|-----|
| PDT000812725.1 | SAMN10038892 | SAMN10038892 | SRR7839411 | GCA 015570535.1 | N/A |
| PDT000812726.1 | SAMN10038893 | SAMN10038893 | SRR7839412 | GCA 015570735.1 | N/A |
| PDT000812727.1 | SAMN10038894 | SAMN10038894 | SRR7839413 | GCA 015570635.1 | N/A |
| PDT000812731.1 | SAMN10038890 | SAMN10038890 | SRR7839417 | GCA 015571075.1 | N/A |
| PDT000812732.1 | SAMN10038891 | SAMN10038891 | SRR7839418 | GCA 015571175.1 | N/A |
| PDT000812733.1 | SAMN10038991 | SAMN10038991 | SRR7839445 | GCA 015571115.1 | N/A |
| PDT000812734.1 | SAMN10038990 | SAMN10038990 | SRR7839446 | GCA 015570935.1 | N/A |
| PDT000812735.1 | SAMN10038989 | SAMN10038989 | SRR7839447 | GCA 015570895.1 | N/A |
| PDT000812736.1 | SAMN10038988 | SAMN10038988 | SRR7839448 | GCA 015571035.1 | N/A |
| PDT000812737.1 | SAMN10038995 | SAMN10038995 | SRR7839449 | GCA 015571055.1 | N/A |
| PDT000812740.1 | SAMN10038992 | SAMN10038992 | SRR7839452 | GCA 015570855.1 | N/A |
| PDT000812742.1 | SAMN10038769 | SAMN10038769 | SRR7839456 | GCA 015570795.1 | N/A |
| PDT000812744.1 | SAMN10038771 | SAMN10038771 | SRR7839458 | GCA 015570815.1 | N/A |
| PDT000812745.1 | SAMN10038772 | SAMN10038772 | SRR7839459 | GCA 015570915.1 | N/A |
| PDT000812746.1 | SAMN10038773 | SAMN10038773 | SRR7839462 | GCA 015570835.1 | N/A |
| PDT000812747.1 | SAMN10038729 | SAMN10038729 | SRR7839497 | GCA 015570975.1 | N/A |
| PDT000812751.1 | SAMN10038852 | SAMN10038852 | SRR7839501 | GCA 015570575.1 | N/A |
| PDT000812752.1 | SAMN10038732 | SAMN10038732 | SRR7839502 | GCA 015570515.1 | N/A |
| PDT000812753.1 | SAMN10038854 | SAMN10038854 | SRR7839503 | GCA 015570675.1 | N/A |
| PDT000812755.1 | SAMN10038856 | SAMN10038856 | SRR7839505 | GCA 015570595.1 | N/A |
| PDT000812756.1 | SAMN10038857 | SAMN10038857 | SRR7839506 | GCA 015570435.1 | N/A |
| PDT000812758.1 | SAMN10038975 | SAMN10038975 | SRR7839560 | GCA 015569695.1 | N/A |
| PDT000812759.1 | SAMN10038974 | SAMN10038974 | SRR7839561 | GCA 015570135.1 | N/A |
| PDT000812760.1 | SAMN10038955 | SAMN10038955 | SRR7839562 | GCA 015569655.1 | N/A |
| PDT000812761.1 | SAMN10038954 | SAMN10038954 | SRR7839563 | GCA 015569895.1 | N/A |
| PDT000812762.1 | SAMN10038953 | SAMN10038953 | SRR7839564 | GCA 015570075.1 | N/A |
| PDT000812763.1 | SAMN10038952 | SAMN10038952 | SRR7839565 | GCA 015569935.1 | N/A |
| PDT000812764.1 | SAMN10038951 | SAMN10038951 | SRR7839566 | GCA 015569855.1 | N/A |
| PDT000812765.1 | SAMN10038950 | SAMN10038950 | SRR7839567 | GCA 015569915.1 | N/A |
| PDT000812766.1 | SAMN10038949 | SAMN10038949 | SRR7839568 | GCA 015570095.1 | N/A |
| PDT000812767.1 | SAMN10038948 | SAMN10038948 | SRR7839569 | GCA 015570655.1 | N/A |
| PDT000812768.1 | SAMN10038957 | SAMN10038957 | SRR7839570 | GCA 015570275.1 | N/A |
| PDT000812769.1 | SAMN10038956 | SAMN10038956 | SRR7839571 | GCA 015570015.1 | N/A |
| PDT000812770.1 | SAMN10038976 | SAMN10038976 | SRR7839592 | GCA 015570415.1 | N/A |
| PDT000812771.1 | SAMN10038807 | SAMN10038807 | SRR7839593 | GCA 015570475.1 | N/A |
| PDT000812773.1 | SAMN10038803 | SAMN10038803 | SRR7839595 | GCA 015570445.1 | N/A |
| PDT000812774.1 | SAMN10038802 | SAMN10038802 | SRR7839596 | GCA 015570315.1 | N/A |
| PDT000812776.1 | SAMN10038804 | SAMN10038804 | SRR7839598 | GCA 015570375.1 | N/A |
| PDT000812780.1 | SAMN10038800 | SAMN10038800 | SRR7839602 | GCA 015570215.1 | N/A |
| PDT000812781.1 | SAMN10038919 | SAMN10038919 | SRR7839603 | GCA 015569715.1 | N/A |
| PDT000812782.1 | SAMN10038918 | SAMN10038918 | SRR7839604 | GCA 015570155.1 | N/A |
| PDT000812785.1 | SAMN10038923 | SAMN10038923 | SRR7839607 | GCA 015569955.1 | N/A |
| PDT000812786.1 | SAMN10038922 | SAMN10038922 | SRR7839608 | GCA 015570055.1 | N/A |
| PDT000812787.1 | SAMN10038925 | SAMN10038925 | SRR7839609 | GCA 015570115.1 | N/A |
| PDT000812788.1 | SAMN10038924 | SAMN10038924 | SRR7839610 | GCA 015569975.1 | N/A |
| PDT000812789.1 | SAMN10038927 | SAMN10038927 | SRR7839611 | GCA 015569775.1 | N/A |
| PDT000812790.1 | SAMN10038926 | SAMN10038926 | SRR7839612 | GCA 015569795.1 | N/A |
| PDT000812792.1 | SAMN10038906 | SAMN10038906 | SRR7839627 | GCA 015569835.1 | N/A |
| PDT000812793.1 | SAMN10038901 | SAMN10038901 | SRR7839632 | GCA 015569815.1 | N/A |
| PDT000812794.1 | SAMN10038900 | SAMN10038900 | SRR7839633 | GCA 015568675.1 | N/A |
| PDT000812798.1 | SAMN10038904 | SAMN10038904 | SRR7839637 | GCA 015569735.1 | N/A |
| PDT000812799.1 | SAMN10038903 | SAMN10038903 | SRR7839638 | GCA 015568795.1 | N/A |
| PDT000812800.1 | SAMN10038902 | SAMN10038902 | SRR7839639 | GCA 015568975.1 | N/A |
| PDT000812802.1 | SAMN10038821 | SAMN10038821 | SRR7839651 | GCA 015568875.1 | N/A |
| PDT000812803.1 | SAMN10038819 | SAMN10038819 | SRR7839653 | GCA 015568815.1 | N/A |
| PDT000812805.1 | SAMN10038815 | SAMN10038815 | SRR7839669 | GCA 015568775.1 | N/A |
| PDT000812806.1 | SAMN10038775 | SAMN10038775 | SRR7839696 | GCA 015568755.1 | N/A |
| PDT000812810.1 | SAMN10038749 | SAMN10038749 | SRR7839700 | GCA 015569135.1 | N/A |
| PDT000812811.1 | SAMN10038754 | SAMN10038754 | SRR7839701 | GCA 015569615.1 | N/A |
| PDT000812812.1 | SAMN10038755 | SAMN10038755 | SRR7839702 | GCA 015569155.1 | N/A |
| PDT000812813.1 | SAMN10038752 | SAMN10038752 | SRR7839703 | GCA 015569675.1 | N/A |
| PDT000812814.1 | SAMN10038753 | SAMN10038753 | SRR7839704 | GCA 015568735.1 | N/A |
| PDT000812815.1 | SAMN10038756 | SAMN10038756 | SRR7839705 | GCA 015568375.1 | N/A |
| PDT000812817.1 | SAMN10038973 | SAMN10038973 | SRR7839715 | GCA 015568935.1 | N/A |
| PDT000812819.1 | SAMN10038969 | SAMN10038969 | SRR7839719 | GCA 015569165.1 | N/A |
| PDT000812820.1 | SAMN10038968 | SAMN10038968 | SRR7839720 | GCA 015569195.1 | N/A |
| PDT000812822.1 | SAMN10038970 | SAMN10038970 | SRR7839722 | GCA 015569115.1 | N/A |
| PDT000812823.1 | SAMN10038836 | SAMN10038836 | SRR7839723 | GCA 015569055.1 | N/A |



|                |              |              |            |                 |     |
|----------------|--------------|--------------|------------|-----------------|-----|
| PDT000812824.1 | SAMN10038837 | SAMN10038837 | SRR7839724 | GCA 015569095.1 | N/A |
| PDT000812825.1 | SAMN10038830 | SAMN10038830 | SRR7839725 | GCA 015569415.1 | N/A |
| PDT000812827.1 | SAMN10038828 | SAMN10038828 | SRR7839727 | GCA 015569335.1 | N/A |
| PDT000812828.1 | SAMN10038829 | SAMN10038829 | SRR7839728 | GCA 015569535.1 | N/A |
| PDT000812829.1 | SAMN10038834 | SAMN10038834 | SRR7839729 | GCA 015569275.1 | N/A |
| PDT000812830.1 | SAMN10038835 | SAMN10038835 | SRR7839730 | GCA 015569255.1 | N/A |
| PDT000812832.1 | SAMN10038833 | SAMN10038833 | SRR7839732 | GCA 015568575.1 | N/A |
| PDT000812836.1 | SAMN10038782 | SAMN10038782 | SRR7839750 | GCA 015569555.1 | N/A |
| PDT000812837.1 | SAMN10038780 | SAMN10038780 | SRR7839752 | GCA 015568615.1 | N/A |
| PDT000812838.1 | SAMN10038779 | SAMN10038779 | SRR7839753 | GCA 015568595.1 | N/A |
| PDT000812839.1 | SAMN10038778 | SAMN10038778 | SRR7839754 | GCA 015568445.1 | N/A |
| PDT000812841.1 | SAMN10038787 | SAMN10038787 | SRR7839757 | GCA 015568515.1 | N/A |
| PDT000812843.1 | SAMN10038929 | SAMN10038929 | SRR7839810 | GCA 015568315.1 | N/A |
| PDT000812844.1 | SAMN10038928 | SAMN10038928 | SRR7839811 | GCA 015569235.1 | N/A |
| PDT000812845.1 | SAMN10038931 | SAMN10038931 | SRR7839812 | GCA 015568475.1 | N/A |
| PDT000812846.1 | SAMN10038930 | SAMN10038930 | SRR7839813 | GCA 015568435.1 | N/A |
| PDT000812847.1 | SAMN10038933 | SAMN10038933 | SRR7839814 | GCA 015569375.1 | N/A |
| PDT000812848.1 | SAMN10038932 | SAMN10038932 | SRR7839815 | GCA 015569395.1 | N/A |
| PDT000812849.1 | SAMN10038935 | SAMN10038935 | SRR7839816 | GCA 015569355.1 | N/A |
| PDT000812853.1 | SAMN10038747 | SAMN10038747 | SRR7839847 | GCA 015568495.1 | N/A |
| PDT000812854.1 | SAMN10038746 | SAMN10038746 | SRR7839848 | GCA 015569575.1 | N/A |
| PDT000812855.1 | SAMN10038741 | SAMN10038741 | SRR7839849 | GCA 015569315.1 | N/A |
| PDT000812856.1 | SAMN10038740 | SAMN10038740 | SRR7839850 | GCA 015569215.1 | N/A |
| PDT000812862.1 | SAMN10038742 | SAMN10038742 | SRR7839856 | GCA 015568275.1 | N/A |
| PDT000812863.1 | SAMN10038883 | SAMN10038883 | SRR7839877 | GCA 015568235.1 | N/A |
| PDT000812864.1 | SAMN10038882 | SAMN10038882 | SRR7839878 | GCA 015568175.1 | N/A |
| PDT000812866.1 | SAMN10038884 | SAMN10038884 | SRR7839880 | GCA 015568335.1 | N/A |
| PDT000812868.1 | SAMN10038878 | SAMN10038878 | SRR7839882 | GCA 015568195.1 | N/A |
| PDT000812869.1 | SAMN10038881 | SAMN10038881 | SRR7839883 | GCA 015568255.1 | N/A |
| PDT000812870.1 | SAMN10038880 | SAMN10038880 | SRR7839884 | GCA 015568155.1 | N/A |
| PDT000812871.1 | SAMN10038887 | SAMN10038887 | SRR7839885 | GCA 015568135.1 | N/A |
| PDT000812872.1 | SAMN10038886 | SAMN10038886 | SRR7839886 | GCA 015568115.1 | N/A |
| PDT000812875.1 | SAMN10038812 | SAMN10038812 | SRR7839891 | GCA 015666045.1 | N/A |
| PDT000812878.1 | SAMN10038808 | SAMN10038808 | SRR7839895 | GCA 015567655.1 | N/A |
| PDT000812879.1 | SAMN10038809 | SAMN10038809 | SRR7839896 | GCA 015567635.1 | N/A |
| PDT000812881.1 | SAMN10038811 | SAMN10038811 | SRR7839898 | GCA 015567515.1 | N/A |
| PDT000812882.1 | SAMN10038848 | SAMN10038848 | SRR7839914 | GCA 015567575.1 | N/A |
| PDT000812883.1 | SAMN10038849 | SAMN10038849 | SRR7839915 | GCA 015567615.1 | N/A |
| PDT000812884.1 | SAMN10038850 | SAMN10038850 | SRR7839916 | GCA 015567585.1 | N/A |
| PDT000812885.1 | SAMN10038851 | SAMN10038851 | SRR7839917 | GCA 015567715.1 | N/A |
| PDT000812886.1 | SAMN10038733 | SAMN10038733 | SRR7839918 | GCA 015568095.1 | N/A |
| PDT000812887.1 | SAMN10038735 | SAMN10038735 | SRR7839927 | GCA 015568055.1 | N/A |
| PDT000812891.1 | SAMN10038966 | SAMN10038966 | SRR7839936 | GCA 015567995.1 | N/A |
| PDT000812892.1 | SAMN10038967 | SAMN10038967 | SRR7839937 | GCA 015567895.1 | N/A |
| PDT000812893.1 | SAMN10038958 | SAMN10038958 | SRR7839944 | GCA 015567915.1 | N/A |
| PDT000812894.1 | SAMN10038959 | SAMN10038959 | SRR7839945 | GCA 015567935.1 | N/A |
| PDT000812898.1 | SAMN10038963 | SAMN10038963 | SRR7839949 | GCA 015567835.1 | N/A |
| PDT000812899.1 | SAMN10038964 | SAMN10038964 | SRR7839950 | GCA 015567755.1 | N/A |
| PDT000812900.1 | SAMN10038965 | SAMN10038965 | SRR7839951 | GCA 015567775.1 | N/A |
| PDT000812901.1 | SAMN10038847 | SAMN10038847 | SRR7839952 | GCA 015567495.1 | N/A |
| PDT000812903.1 | SAMN10038839 | SAMN10038839 | SRR7839956 | GCA 015567475.1 | N/A |
| PDT000812905.1 | SAMN10038841 | SAMN10038841 | SRR7839958 | GCA 015567455.1 | N/A |
| PDT000812906.1 | SAMN10038840 | SAMN10038840 | SRR7839959 | GCA 015567375.1 | N/A |
| PDT000812907.1 | SAMN10038843 | SAMN10038843 | SRR7839960 | GCA 015567415.1 | N/A |
| PDT000812908.1 | SAMN10038842 | SAMN10038842 | SRR7839961 | GCA 015567395.1 | N/A |
| PDT000812909.1 | SAMN10038845 | SAMN10038845 | SRR7839962 | GCA 015567335.1 | N/A |
| PDT000812910.1 | SAMN10038844 | SAMN10038844 | SRR7839963 | GCA 015567355.1 | N/A |
| PDT000812912.1 | SAMN10038758 | SAMN10038758 | SRR7839985 | GCA 015567295.1 | N/A |
| PDT000812913.1 | SAMN10038761 | SAMN10038761 | SRR7839986 | GCA 015566675.1 | N/A |
| PDT000812914.1 | SAMN10038760 | SAMN10038760 | SRR7839987 | GCA 015567215.1 | N/A |
| PDT000812916.1 | SAMN10038762 | SAMN10038762 | SRR7839989 | GCA 015567235.1 | N/A |
| PDT000812917.1 | SAMN10038765 | SAMN10038765 | SRR7839990 | GCA 015566955.1 | N/A |
| PDT000812921.1 | SAMN10038984 | SAMN10038984 | SRR7840002 | GCA 015566915.1 | N/A |
| PDT000812924.1 | SAMN10038983 | SAMN10038983 | SRR7840005 | GCA 015567195.1 | N/A |
| PDT000812928.1 | SAMN10038867 | SAMN10038867 | SRR7840010 | GCA 015567155.1 | N/A |
| PDT000812929.1 | SAMN10038866 | SAMN10038866 | SRR7840011 | GCA 015567065.1 | N/A |
| PDT000812930.1 | SAMN10038865 | SAMN10038865 | SRR7840012 | GCA 015567035.1 | N/A |
| PDT000812931.1 | SAMN10038864 | SAMN10038864 | SRR7840013 | GCA 015567095.1 | N/A |

|                |              |              |             |                 |     |
|----------------|--------------|--------------|-------------|-----------------|-----|
| PDT000812933.1 | SAMN10038862 | SAMN10038862 | SRR7840015  | GCA 015567115.1 | N/A |
| PDT000812934.1 | SAMN10038861 | SAMN10038861 | SRR7840016  | GCA 015566795.1 | N/A |
| PDT000812935.1 | SAMN10038860 | SAMN10038860 | SRR7840017  | GCA 015566695.1 | N/A |
| PDT000812936.1 | SAMN10038859 | SAMN10038859 | SRR7840018  | GCA 015566935.1 | N/A |
| PDT000812937.1 | SAMN10038858 | SAMN10038858 | SRR7840019  | GCA 015566635.1 | N/A |
| PDT000812938.1 | SAMN10038794 | SAMN10038794 | SRR7840036  | GCA 015566815.1 | N/A |
| PDT000812939.1 | SAMN10038827 | SAMN10038827 | SRR7840040  | GCA 015566615.1 | N/A |
| PDT000812940.1 | SAMN10038781 | SAMN10038781 | SRR7840068  | GCA 015567555.1 | N/A |
| PDT000812941.1 | SAMN10038774 | SAMN10038774 | SRR7840080  | GCA 015566715.1 | N/A |
| PDT000812942.1 | SAMN10038940 | SAMN10038940 | SRR7840084  | GCA 015566745.1 | N/A |
| PDT000812943.1 | SAMN10038941 | SAMN10038941 | SRR7840085  | GCA 015566775.1 | N/A |
| PDT000812945.1 | SAMN10038939 | SAMN10038939 | SRR7840087  | GCA 015566875.1 | N/A |
| PDT000812946.1 | SAMN10038944 | SAMN10038944 | SRR7840088  | GCA 015566835.1 | N/A |
| PDT000812947.1 | SAMN10038945 | SAMN10038945 | SRR7840089  | GCA 015566555.1 | N/A |
| PDT000812948.1 | SAMN10038942 | SAMN10038942 | SRR7840090  | GCA 015566575.1 | N/A |
| PDT000812950.1 | SAMN10038946 | SAMN10038946 | SRR7840093  | GCA 015566495.1 | N/A |
| PDT000812955.1 | SAMN10038824 | SAMN10038824 | SRR7840101  | GCA 015566415.1 | N/A |
| PDT000812958.1 | SAMN10038986 | SAMN10038986 | SRR7840104  | GCA 015566335.1 | N/A |
| PDT000812959.1 | SAMN10038987 | SAMN10038987 | SRR7840110  | GCA 015566355.1 | N/A |
| PDT000812960.1 | SAMN10038796 | SAMN10038796 | SRR7840122  | GCA 015566295.1 | N/A |
| PDT000812963.1 | SAMN10038792 | SAMN10038792 | SRR7840126  | GCA 015566315.1 | N/A |
| PDT000812964.1 | SAMN10038793 | SAMN10038793 | SRR7840127  | GCA 015566275.1 | N/A |
| PDT000812969.1 | SAMN10038874 | SAMN10038874 | SRR7840157  | GCA 015566145.1 | N/A |
| PDT000812970.1 | SAMN10038875 | SAMN10038875 | SRR7840158  | GCA 015566095.1 | N/A |
| PDT000812971.1 | SAMN10038872 | SAMN10038872 | SRR7840159  | GCA 015566115.1 | N/A |
| PDT000812972.1 | SAMN10038873 | SAMN10038873 | SRR7840160  | GCA 015565295.1 | N/A |
| PDT000812973.1 | SAMN10038870 | SAMN10038870 | SRR7840161  | GCA 015565075.1 | N/A |
| PDT000812974.1 | SAMN10038871 | SAMN10038871 | SRR7840162  | GCA 015565195.1 | N/A |
| PDT000812975.1 | SAMN10038868 | SAMN10038868 | SRR7840163  | GCA 015561425.1 | N/A |
| PDT000812976.1 | SAMN10038869 | SAMN10038869 | SRR7840164  | GCA 015561435.1 | N/A |
| PDT000812977.1 | SAMN10038876 | SAMN10038876 | SRR7840165  | GCA 015561505.1 | N/A |
| PDT000812978.1 | SAMN10038877 | SAMN10038877 | SRR7840166  | GCA 015561485.1 | N/A |
| PDT000813063.1 | SAMN12220503 | SAMN12220503 | SRR9647378  | GCA 015546555.1 | N/A |
| PDT000813594.1 | SAMN12776237 | SAMN12776237 | SRR10179021 | GCA 009456275.1 | N/A |
| PDT000813595.1 | SAMN12776239 | SAMN12776239 | SRR10179019 | GCA 009456265.1 | N/A |
| PDT000813596.1 | SAMN12776238 | SAMN12776238 | SRR10179020 | GCA 009456285.1 | N/A |
| PDT000813597.1 | SAMN12776236 | SAMN12776236 | SRR10179022 | GCA 009456335.1 | N/A |
| PDT000813600.1 | SAMN12776233 | SAMN12776233 | SRR10179025 | GCA 009456385.1 | N/A |
| PDT000813601.1 | SAMN12776234 | SAMN12776234 | SRR10179024 | GCA 009456395.1 | N/A |
| PDT000813602.1 | SAMN12776230 | SAMN12776230 | SRR10179029 | GCA 009456425.1 | N/A |
| PDT000813604.1 | SAMN12776229 | SAMN12776229 | SRR10179030 | GCA 009456455.1 | N/A |
| PDT000813605.1 | SAMN12776228 | SAMN12776228 | SRR10179031 | GCA 009456465.1 | N/A |
| PDT000813606.1 | SAMN12776227 | SAMN12776227 | SRR10179032 | GCA 009456485.1 | N/A |
| PDT000813608.1 | SAMN12776225 | SAMN12776225 | SRR10179034 | GCA 009456545.1 | N/A |
| PDT000813609.1 | SAMN12776223 | SAMN12776223 | SRR10179036 | GCA 009456585.1 | N/A |
| PDT000813610.1 | SAMN12776224 | SAMN12776224 | SRR10179035 | GCA 009456565.1 | N/A |
| PDT000813611.1 | SAMN12776222 | SAMN12776222 | SRR10179037 | GCA 009456575.1 | N/A |
| PDT000813613.1 | SAMN12776220 | SAMN12776220 | SRR10179040 | GCA 009456635.1 | N/A |
| PDT000813614.1 | SAMN12776217 | SAMN12776217 | SRR10179043 | GCA 009456675.1 | N/A |
| PDT000813615.1 | SAMN12776219 | SAMN12776219 | SRR10179041 | GCA 009456665.1 | N/A |
| PDT000813616.1 | SAMN12776218 | SAMN12776218 | SRR10179042 | GCA 009456705.1 | N/A |
| PDT000813617.1 | SAMN12776215 | SAMN12776215 | SRR10179045 | GCA 009456725.1 | N/A |
| PDT000813618.1 | SAMN12776216 | SAMN12776216 | SRR10179044 | GCA 009456715.1 | N/A |
| PDT000813619.1 | SAMN12776214 | SAMN12776214 | SRR10179046 | GCA 009456765.1 | N/A |
| PDT000813620.1 | SAMN12776213 | SAMN12776213 | SRR10179047 | GCA 009456775.1 | N/A |
| PDT000813621.1 | SAMN12776211 | SAMN12776211 | SRR10179050 | GCA 009456805.1 | N/A |
| PDT000813622.1 | SAMN12776210 | SAMN12776210 | SRR10179051 | GCA 009456825.1 | N/A |
| PDT000813623.1 | SAMN12776212 | SAMN12776212 | SRR10179048 | GCA 009456835.1 | N/A |
| PDT000813624.1 | SAMN12776209 | SAMN12776209 | SRR10179052 | GCA 009456865.1 | N/A |
| PDT000813626.1 | SAMN12776207 | SAMN12776207 | SRR10179054 | GCA 009456905.1 | N/A |
| PDT000813627.1 | SAMN12776206 | SAMN12776206 | SRR10179055 | GCA 009456915.1 | N/A |
| PDT000813628.1 | SAMN12776205 | SAMN12776205 | SRR10179056 | GCA 009456945.1 | N/A |
| PDT000813629.1 | SAMN12776204 | SAMN12776204 | SRR10179057 | GCA 009456965.1 | N/A |
| PDT000813630.1 | SAMN12776203 | SAMN12776203 | SRR10179058 | GCA 009456975.1 | N/A |
| PDT000813632.1 | SAMN12776202 | SAMN12776202 | SRR10179059 | GCA 009457015.1 | N/A |
| PDT000813634.1 | SAMN12776198 | SAMN12776198 | SRR10179064 | GCA 009457065.1 | N/A |
| PDT000813635.1 | SAMN12776199 | SAMN12776199 | SRR10179063 | GCA 009457075.1 | N/A |
| PDT000813637.1 | SAMN12776197 | SAMN12776197 | SRR10179065 | GCA 009457115.1 | N/A |

|                |              |              |             |                 |     |
|----------------|--------------|--------------|-------------|-----------------|-----|
| PDT000813638.1 | SAMN12776195 | SAMN12776195 | SRR10179067 | GCA 009457125.1 | N/A |
| PDT000813639.1 | SAMN12776193 | SAMN12776193 | SRR10179069 | GCA 009457165.1 | N/A |
| PDT000813641.1 | SAMN12776190 | SAMN12776190 | SRR10179073 | GCA 009457195.1 | N/A |
| PDT000813644.1 | SAMN12776189 | SAMN12776189 | SRR10179074 | GCA 009457275.1 | N/A |
| PDT000813645.1 | SAMN12776187 | SAMN12776187 | SRR10179076 | GCA 009457265.1 | N/A |
| PDT000813647.1 | SAMN12776188 | SAMN12776188 | SRR10179075 | GCA 009457285.1 | N/A |
| PDT000813649.1 | SAMN12776183 | SAMN12776183 | SRR10179080 | GCA 009457375.1 | N/A |
| PDT000813650.1 | SAMN12776184 | SAMN12776184 | SRR10179079 | GCA 009457365.1 | N/A |
| PDT000813651.1 | SAMN12776182 | SAMN12776182 | SRR10179081 | GCA 009457405.1 | N/A |
| PDT000813654.1 | SAMN12776178 | SAMN12776178 | SRR10179088 | GCA 009457465.1 | N/A |
| PDT000813656.1 | SAMN12776175 | SAMN12776175 | SRR10179091 | GCA 009457495.1 | N/A |
| PDT000813657.1 | SAMN12776177 | SAMN12776177 | SRR10179089 | GCA 009457515.1 | N/A |
| PDT000813658.1 | SAMN12776176 | SAMN12776176 | SRR10179090 | GCA 009457535.1 | N/A |
| PDT000813659.1 | SAMN12776174 | SAMN12776174 | SRR10179092 | GCA 009457555.1 | N/A |
| PDT000813660.1 | SAMN12776173 | SAMN12776173 | SRR10179093 | GCA 009457585.1 | N/A |
| PDT000813661.1 | SAMN12776171 | SAMN12776171 | SRR10179096 | GCA 009457605.1 | N/A |
| PDT000813663.1 | SAMN12776170 | SAMN12776170 | SRR10179097 | GCA 009457625.1 | N/A |
| PDT000813665.1 | SAMN12776168 | SAMN12776168 | SRR10179099 | GCA 009457665.1 | N/A |
| PDT000813666.1 | SAMN12776167 | SAMN12776167 | SRR10179272 | GCA 009457705.1 | N/A |
| PDT000813669.1 | SAMN12776164 | SAMN12776164 | SRR10179275 | GCA 009457765.1 | N/A |
| PDT000813670.1 | SAMN12776163 | SAMN12776163 | SRR10179276 | GCA 009457775.1 | N/A |
| PDT000813671.1 | SAMN12776162 | SAMN12776162 | SRR10179277 | GCA 009457805.1 | N/A |
| PDT000813672.1 | SAMN12776160 | SAMN12776160 | SRR10179280 | GCA 009457815.1 | N/A |
| PDT000813673.1 | SAMN12776161 | SAMN12776161 | SRR10179279 | GCA 009457835.1 | N/A |
| PDT000813674.1 | SAMN12776159 | SAMN12776159 | SRR10179281 | GCA 009457865.1 | N/A |
| PDT000813675.1 | SAMN12776158 | SAMN12776158 | SRR10179282 | GCA 009457875.1 | N/A |
| PDT000813677.1 | SAMN12776156 | SAMN12776156 | SRR10179284 | GCA 009457915.1 | N/A |
| PDT000813678.1 | SAMN12776155 | SAMN12776155 | SRR10179285 | GCA 009457935.1 | N/A |
| PDT000813680.1 | SAMN12776153 | SAMN12776153 | SRR10179287 | GCA 009457985.1 | N/A |
| PDT000813683.1 | SAMN12776149 | SAMN12776149 | SRR10179293 | GCA 009458045.1 | N/A |
| PDT000813684.1 | SAMN12776150 | SAMN12776150 | SRR10179292 | GCA 009458075.1 | N/A |
| PDT000813685.1 | SAMN12776148 | SAMN12776148 | SRR10179294 | GCA 009458055.1 | N/A |
| PDT000813686.1 | SAMN12776147 | SAMN12776147 | SRR10179295 | GCA 009458065.1 | N/A |
| PDT000813687.1 | SAMN12776146 | SAMN12776146 | SRR10179296 | GCA 009458085.1 | N/A |
| PDT000813688.1 | SAMN12776145 | SAMN12776145 | SRR10179297 | GCA 009458145.1 | N/A |
| PDT000813690.1 | SAMN12776144 | SAMN12776144 | SRR10179298 | GCA 009458205.1 | N/A |
| PDT000813691.1 | SAMN12776142 | SAMN12776142 | SRR10179300 | GCA 009458175.1 | N/A |
| PDT000813692.1 | SAMN12776141 | SAMN12776141 | SRR10179302 | GCA 009458195.1 | N/A |
| PDT000813693.1 | SAMN12776140 | SAMN12776140 | SRR10179303 | GCA 009458245.1 | N/A |
| PDT000813696.1 | SAMN12776135 | SAMN12776135 | SRR10179308 | GCA 009458315.1 | N/A |
| PDT000813700.1 | SAMN12776133 | SAMN12776133 | SRR10179310 | GCA 009458385.1 | N/A |
| PDT000813702.1 | SAMN12776130 | SAMN12776130 | SRR10179314 | GCA 009458425.1 | N/A |
| PDT000813703.1 | SAMN12776132 | SAMN12776132 | SRR10179311 | GCA 009458415.1 | N/A |
| PDT000813704.1 | SAMN12776126 | SAMN12776126 | SRR10179102 | GCA 009458465.1 | N/A |
| PDT000813705.1 | SAMN12776128 | SAMN12776128 | SRR10179100 | GCA 009458485.1 | N/A |
| PDT000813706.1 | SAMN12776129 | SAMN12776129 | SRR10179315 | GCA 009458475.1 | N/A |
| PDT000813707.1 | SAMN12776127 | SAMN12776127 | SRR10179101 | GCA 009458525.1 | N/A |
| PDT000813709.1 | SAMN12776124 | SAMN12776124 | SRR10179104 | GCA 009458565.1 | N/A |
| PDT000813710.1 | SAMN12776122 | SAMN12776122 | SRR10179106 | GCA 009458585.1 | N/A |
| PDT000813713.1 | SAMN12776121 | SAMN12776121 | SRR10179108 | GCA 009458635.1 | N/A |
| PDT000813715.1 | SAMN12776119 | SAMN12776119 | SRR10179110 | GCA 009458665.1 | N/A |
| PDT000813718.1 | SAMN12776115 | SAMN12776115 | SRR10179114 | GCA 009458735.1 | N/A |
| PDT000813719.1 | SAMN12776114 | SAMN12776114 | SRR10179115 | GCA 009458765.1 | N/A |
| PDT000813720.1 | SAMN12776112 | SAMN12776112 | SRR10179117 | GCA 009458775.1 | N/A |
| PDT000813721.1 | SAMN12776113 | SAMN12776113 | SRR10179116 | GCA 009458785.1 | N/A |
| PDT000813723.1 | SAMN12776110 | SAMN12776110 | SRR10179120 | GCA 009458845.1 | N/A |
| PDT000813724.1 | SAMN12776109 | SAMN12776109 | SRR10179121 | GCA 009458865.1 | N/A |
| PDT000813725.1 | SAMN12776107 | SAMN12776107 | SRR10179123 | GCA 009458895.1 | N/A |
| PDT000813727.1 | SAMN12776108 | SAMN12776108 | SRR10179122 | GCA 009458855.1 | N/A |
| PDT000813731.1 | SAMN12776102 | SAMN12776102 | SRR10179128 | GCA 009459005.1 | N/A |
| PDT000813733.1 | SAMN12776099 | SAMN12776099 | SRR10179132 | GCA 009459045.1 | N/A |
| PDT000813734.1 | SAMN12776101 | SAMN12776101 | SRR10179130 | GCA 009459015.1 | N/A |
| PDT000813736.1 | SAMN12776096 | SAMN12776096 | SRR10179135 | GCA 009459095.1 | N/A |
| PDT000813737.1 | SAMN12776095 | SAMN12776095 | SRR10179136 | GCA 009459125.1 | N/A |
| PDT000813739.1 | SAMN12776093 | SAMN12776093 | SRR10179138 | GCA 009459175.1 | N/A |
| PDT000813741.1 | SAMN12776090 | SAMN12776090 | SRR10179142 | GCA 009459195.1 | N/A |
| PDT000813742.1 | SAMN12776092 | SAMN12776092 | SRR10179139 | GCA 009459225.1 | N/A |
| PDT000813744.1 | SAMN12776089 | SAMN12776089 | SRR10179143 | GCA 009459265.1 | N/A |

|                |              |              |             |                 |     |
|----------------|--------------|--------------|-------------|-----------------|-----|
| PDT000813745.1 | SAMN12776088 | SAMN12776088 | SRR10179144 | GCA 009459295.1 | N/A |
| PDT000813746.1 | SAMN12776087 | SAMN12776087 | SRR10179145 | GCA 009459285.1 | N/A |
| PDT000813747.1 | SAMN12776086 | SAMN12776086 | SRR10179146 | GCA 009459325.1 | N/A |
| PDT000813748.1 | SAMN12776085 | SAMN12776085 | SRR10179147 | GCA 009459345.1 | N/A |
| PDT000813749.1 | SAMN12776082 | SAMN12776082 | SRR10179150 | GCA 009459365.1 | N/A |
| PDT000813751.1 | SAMN12776083 | SAMN12776083 | SRR10179149 | GCA 009459395.1 | N/A |
| PDT000813753.1 | SAMN12776081 | SAMN12776081 | SRR10179152 | GCA 009459415.1 | N/A |
| PDT000813755.1 | SAMN12776078 | SAMN12776078 | SRR10179155 | GCA 009459475.1 | N/A |
| PDT000813756.1 | SAMN12776075 | SAMN12776075 | SRR10179158 | GCA 009459505.1 | N/A |
| PDT000813759.1 | SAMN12776073 | SAMN12776073 | SRR10179160 | GCA 009459555.1 | N/A |
| PDT000813760.1 | SAMN12776074 | SAMN12776074 | SRR10179159 | GCA 009459565.1 | N/A |
| PDT000813761.1 | SAMN12776072 | SAMN12776072 | SRR10179161 | GCA 009459605.1 | N/A |
| PDT000813762.1 | SAMN12776071 | SAMN12776071 | SRR10179163 | GCA 009459615.1 | N/A |
| PDT000813763.1 | SAMN12776069 | SAMN12776069 | SRR10179165 | GCA 009459635.1 | N/A |
| PDT000813764.1 | SAMN12776070 | SAMN12776070 | SRR10179164 | GCA 009459655.1 | N/A |
| PDT000813765.1 | SAMN12776068 | SAMN12776068 | SRR10179166 | GCA 009459675.1 | N/A |
| PDT000813767.1 | SAMN12776065 | SAMN12776065 | SRR10179169 | GCA 009459715.1 | N/A |
| PDT000813768.1 | SAMN12776066 | SAMN12776066 | SRR10179168 | GCA 009459725.1 | N/A |
| PDT000813769.1 | SAMN12776063 | SAMN12776063 | SRR10179171 | GCA 009459745.1 | N/A |
| PDT000813770.1 | SAMN12776064 | SAMN12776064 | SRR10179170 | GCA 009459755.1 | N/A |
| PDT000813773.1 | SAMN12776060 | SAMN12776060 | SRR10179175 | GCA 009459855.1 | N/A |
| PDT000813775.1 | SAMN12776058 | SAMN12776058 | SRR10179177 | GCA 009459845.1 | N/A |
| PDT000813776.1 | SAMN12776056 | SAMN12776056 | SRR10179179 | GCA 009459905.1 | N/A |
| PDT000813777.1 | SAMN12776057 | SAMN12776057 | SRR10179178 | GCA 009459915.1 | N/A |
| PDT000813779.1 | SAMN12776054 | SAMN12776054 | SRR10179181 | GCA 009459965.1 | N/A |
| PDT000813781.1 | SAMN12776052 | SAMN12776052 | SRR10179183 | GCA 009460015.1 | N/A |
| PDT000813782.1 | SAMN12776051 | SAMN12776051 | SRR10179186 | GCA 009459995.1 | N/A |
| PDT000813784.1 | SAMN12776048 | SAMN12776048 | SRR10179189 | GCA 009460075.1 | N/A |
| PDT000813785.1 | SAMN12776049 | SAMN12776049 | SRR10179188 | GCA 009460055.1 | N/A |
| PDT000813787.1 | SAMN12776047 | SAMN12776047 | SRR10179190 | GCA 009460115.1 | N/A |
| PDT000813788.1 | SAMN12776045 | SAMN12776045 | SRR10179192 | GCA 009460145.1 | N/A |
| PDT000813789.1 | SAMN12776044 | SAMN12776044 | SRR10179193 | GCA 009460165.1 | N/A |
| PDT000813790.1 | SAMN12776043 | SAMN12776043 | SRR10179194 | GCA 009460175.1 | N/A |
| PDT000813791.1 | SAMN12776042 | SAMN12776042 | SRR10179195 | GCA 009460205.1 | N/A |
| PDT000813795.1 | SAMN12776037 | SAMN12776037 | SRR10179201 | GCA 009460275.1 | N/A |
| PDT000813797.1 | SAMN12776035 | SAMN12776035 | SRR10179203 | GCA 009460305.1 | N/A |
| PDT000813798.1 | SAMN12776036 | SAMN12776036 | SRR10179202 | GCA 009460335.1 | N/A |
| PDT000813800.1 | SAMN12776031 | SAMN12776031 | SRR10179208 | GCA 009460385.1 | N/A |
| PDT000813803.1 | SAMN12776029 | SAMN12776029 | SRR10179210 | GCA 009460445.1 | N/A |
| PDT000813804.1 | SAMN12776030 | SAMN12776030 | SRR10179209 | GCA 009460435.1 | N/A |
| PDT000813806.1 | SAMN12776027 | SAMN12776027 | SRR10179212 | GCA 009460505.1 | N/A |
| PDT000813808.1 | SAMN12776025 | SAMN12776025 | SRR10179214 | GCA 009460545.1 | N/A |
| PDT000813809.1 | SAMN12776024 | SAMN12776024 | SRR10179215 | GCA 009460555.1 | N/A |
| PDT000813810.1 | SAMN12776023 | SAMN12776023 | SRR10179216 | GCA 009460565.1 | N/A |
| PDT000813816.1 | SAMN12776017 | SAMN12776017 | SRR10179223 | GCA 009460685.1 | N/A |
| PDT000813817.1 | SAMN12776016 | SAMN12776016 | SRR10179224 | GCA 009460725.1 | N/A |
| PDT000813818.1 | SAMN12776014 | SAMN12776014 | SRR10179226 | GCA 009460745.1 | N/A |
| PDT000813819.1 | SAMN12776015 | SAMN12776015 | SRR10179225 | GCA 009460765.1 | N/A |
| PDT000813820.1 | SAMN12776013 | SAMN12776013 | SRR10179227 | GCA 009460755.1 | N/A |
| PDT000813823.1 | SAMN12776010 | SAMN12776010 | SRR10179231 | GCA 009460835.1 | N/A |
| PDT000813824.1 | SAMN12776008 | SAMN12776008 | SRR10179233 | GCA 009460865.1 | N/A |
| PDT000813825.1 | SAMN12776007 | SAMN12776007 | SRR10179234 | GCA 009460885.1 | N/A |
| PDT000813826.1 | SAMN12776009 | SAMN12776009 | SRR10179232 | GCA 009460875.1 | N/A |
| PDT000813830.1 | SAMN12776002 | SAMN12776002 | SRR10179239 | GCA 009460975.1 | N/A |
| PDT000813832.1 | SAMN12776001 | SAMN12776001 | SRR10179241 | GCA 009461025.1 | N/A |
| PDT000813835.1 | SAMN12775997 | SAMN12775997 | SRR10179245 | GCA 009461085.1 | N/A |
| PDT000813836.1 | SAMN12775998 | SAMN12775998 | SRR10179244 | GCA 009461075.1 | N/A |
| PDT000813837.1 | SAMN12775996 | SAMN12775996 | SRR10179246 | GCA 009461125.1 | N/A |
| PDT000813838.1 | SAMN12775995 | SAMN12775995 | SRR10179247 | GCA 009461135.1 | N/A |
| PDT000813839.1 | SAMN12775992 | SAMN12775992 | SRR10179250 | GCA 009461145.1 | N/A |
| PDT000813840.1 | SAMN12775994 | SAMN12775994 | SRR10179248 | GCA 009461165.1 | N/A |
| PDT000813843.1 | SAMN12775991 | SAMN12775991 | SRR10179252 | GCA 009461225.1 | N/A |
| PDT000813844.1 | SAMN12775988 | SAMN12775988 | SRR10179255 | GCA 009461255.1 | N/A |
| PDT000813845.1 | SAMN12775990 | SAMN12775990 | SRR10179253 | GCA 009461265.1 | N/A |
| PDT000813846.1 | SAMN12775987 | SAMN12775987 | SRR10179256 | GCA 009461285.1 | N/A |
| PDT000813848.1 | SAMN12775985 | SAMN12775985 | SRR10179258 | GCA 009461335.1 | N/A |
| PDT000813850.1 | SAMN12775984 | SAMN12775984 | SRR10179259 | GCA 009461385.1 | N/A |
| PDT000813851.1 | SAMN12775983 | SAMN12775983 | SRR10179260 | GCA 009461375.1 | N/A |

|                |              |              |             |                 |     |
|----------------|--------------|--------------|-------------|-----------------|-----|
| PDT000813853.1 | SAMN12775978 | SAMN12775978 | SRR10179266 | GCA 009461455.1 | N/A |
| PDT000813858.1 | SAMN12775973 | SAMN12775973 | SRR10179271 | GCA 009461535.1 | N/A |
| PDT000813859.1 | SAMN12775974 | SAMN12775974 | SRR10179270 | GCA 009461555.1 | N/A |
| PDT000813860.1 | SAMN12775975 | SAMN12775975 | SRR10179269 | GCA 009461595.1 | N/A |
| PDT000813861.1 | SAMN12775972 | SAMN12775972 | SRR10178928 | GCA 009461575.1 | N/A |
| PDT000813862.1 | SAMN12775970 | SAMN12775970 | SRR10178931 | GCA 009461625.1 | N/A |
| PDT000813864.1 | SAMN12775967 | SAMN12775967 | SRR10178934 | GCA 009461675.1 | N/A |
| PDT000813865.1 | SAMN12775968 | SAMN12775968 | SRR10178933 | GCA 009461655.1 | N/A |
| PDT000813866.1 | SAMN12775969 | SAMN12775969 | SRR10178932 | GCA 009461685.1 | N/A |
| PDT000813867.1 | SAMN12775966 | SAMN12775966 | SRR10178935 | GCA 009461725.1 | N/A |
| PDT000813868.1 | SAMN12775963 | SAMN12775963 | SRR10178938 | GCA 009461745.1 | N/A |
| PDT000813869.1 | SAMN12775964 | SAMN12775964 | SRR10178937 | GCA 009461765.1 | N/A |
| PDT000813872.1 | SAMN12775962 | SAMN12775962 | SRR10178939 | GCA 009461805.1 | N/A |
| PDT000813875.1 | SAMN12775960 | SAMN12775960 | SRR10178942 | GCA 009461885.1 | N/A |
| PDT000813876.1 | SAMN12775957 | SAMN12775957 | SRR10178945 | GCA 009461905.1 | N/A |
| PDT000813877.1 | SAMN12775956 | SAMN12775956 | SRR10178946 | GCA 009461915.1 | N/A |
| PDT000813880.1 | SAMN12775953 | SAMN12775953 | SRR10178949 | GCA 009461975.1 | N/A |
| PDT000813881.1 | SAMN12775952 | SAMN12775952 | SRR10178950 | GCA 009461995.1 | N/A |
| PDT000813882.1 | SAMN12775951 | SAMN12775951 | SRR10178952 | GCA 009462025.1 | N/A |
| PDT000813885.1 | SAMN12775950 | SAMN12775950 | SRR10178953 | GCA 009462035.1 | N/A |
| PDT000813886.1 | SAMN12775947 | SAMN12775947 | SRR10178956 | GCA 009462105.1 | N/A |
| PDT000813887.1 | SAMN12775945 | SAMN12775945 | SRR10178958 | GCA 009462125.1 | N/A |
| PDT000813888.1 | SAMN12775943 | SAMN12775943 | SRR10178960 | GCA 009462135.1 | N/A |
| PDT000813889.1 | SAMN12775944 | SAMN12775944 | SRR10178959 | GCA 009462165.1 | N/A |
| PDT000813893.1 | SAMN12775940 | SAMN12775940 | SRR10178964 | GCA 009462245.1 | N/A |
| PDT000813894.1 | SAMN12775941 | SAMN12775941 | SRR10178963 | GCA 009462255.1 | N/A |
| PDT000813896.1 | SAMN12775939 | SAMN12775939 | SRR10178965 | GCA 009462265.1 | N/A |
| PDT000813898.1 | SAMN12775932 | SAMN12775932 | SRR10178972 | GCA 009462355.1 | N/A |
| PDT000813899.1 | SAMN12775934 | SAMN12775934 | SRR10178970 | GCA 009462345.1 | N/A |
| PDT000813900.1 | SAMN12775933 | SAMN12775933 | SRR10178971 | GCA 009462365.1 | N/A |
| PDT000813904.1 | SAMN12775926 | SAMN12775926 | SRR10178979 | GCA 009462505.1 | N/A |
| PDT000813907.1 | SAMN12775930 | SAMN12775930 | SRR10178975 | GCA 009462475.1 | N/A |
| PDT000813909.1 | SAMN12775925 | SAMN12775925 | SRR10178980 | GCA 009462555.1 | N/A |
| PDT000813910.1 | SAMN12775924 | SAMN12775924 | SRR10178981 | GCA 009462585.1 | N/A |
| PDT000813913.1 | SAMN12775920 | SAMN12775920 | SRR10178986 | GCA 009462645.1 | N/A |
| PDT000813914.1 | SAMN12775919 | SAMN12775919 | SRR10178987 | GCA 009462655.1 | N/A |
| PDT000813917.1 | SAMN12775916 | SAMN12775916 | SRR10178990 | GCA 009462715.1 | N/A |
| PDT000813919.1 | SAMN12775913 | SAMN12775913 | SRR10178993 | GCA 009462765.1 | N/A |
| PDT000813920.1 | SAMN12775914 | SAMN12775914 | SRR10178992 | GCA 009462755.1 | N/A |
| PDT000813921.1 | SAMN12775912 | SAMN12775912 | SRR10178994 | GCA 009462805.1 | N/A |
| PDT000813926.1 | SAMN12775906 | SAMN12775906 | SRR10179001 | GCA 009462915.1 | N/A |
| PDT000813928.1 | SAMN12775907 | SAMN12775907 | SRR10179000 | GCA 009462905.1 | N/A |
| PDT000813930.1 | SAMN12775902 | SAMN12775902 | SRR10179005 | GCA 009462985.1 | N/A |
| PDT000813931.1 | SAMN12775900 | SAMN12775900 | SRR10179008 | GCA 009463025.1 | N/A |
| PDT000813932.1 | SAMN12775903 | SAMN12775903 | SRR10179004 | GCA 009462995.1 | N/A |
| PDT000813933.1 | SAMN12775901 | SAMN12775901 | SRR10179007 | GCA 009463015.1 | N/A |
| PDT000813934.1 | SAMN12775898 | SAMN12775898 | SRR10179010 | GCA 009463075.1 | N/A |
| PDT000813935.1 | SAMN12775899 | SAMN12775899 | SRR10179009 | GCA 009463065.1 | N/A |
| PDT000813936.1 | SAMN12775897 | SAMN12775897 | SRR10179011 | GCA 009463095.1 | N/A |
| PDT000813941.1 | SAMN12775890 | SAMN12775890 | SRR10179027 | GCA 009463185.1 | N/A |
| PDT000813942.1 | SAMN12775891 | SAMN12775891 | SRR10179018 | GCA 009463195.1 | N/A |
| PDT000813944.1 | SAMN12775889 | SAMN12775889 | SRR10179038 | GCA 009463265.1 | N/A |
| PDT000813945.1 | SAMN12775886 | SAMN12775886 | SRR10179071 | GCA 009463275.1 | N/A |
| PDT000813946.1 | SAMN12775885 | SAMN12775885 | SRR10179084 | GCA 009463285.1 | N/A |
| PDT000813947.1 | SAMN12775887 | SAMN12775887 | SRR10179060 | GCA 009463315.1 | N/A |
| PDT000813948.1 | SAMN12775888 | SAMN12775888 | SRR10179049 | GCA 009463295.1 | N/A |
| PDT000813949.1 | SAMN12775883 | SAMN12775883 | SRR10179278 | GCA 009463385.1 | N/A |
| PDT000813950.1 | SAMN12775882 | SAMN12775882 | SRR10179289 | GCA 009463365.1 | N/A |
| PDT000813951.1 | SAMN12775884 | SAMN12775884 | SRR10179095 | GCA 009463375.1 | N/A |
| PDT000813952.1 | SAMN12775881 | SAMN12775881 | SRR10179301 | GCA 009463395.1 | N/A |
| PDT000813954.1 | SAMN12775879 | SAMN12775879 | SRR10179107 | GCA 009463465.1 | N/A |
| PDT000813955.1 | SAMN12775877 | SAMN12775877 | SRR10179129 | GCA 009463475.1 | N/A |
| PDT000813958.1 | SAMN12775878 | SAMN12775878 | SRR10179118 | GCA 009463495.1 | N/A |
| PDT000813963.1 | SAMN12775870 | SAMN12775870 | SRR10179207 | GCA 009463595.1 | N/A |
| PDT000813965.1 | SAMN12775866 | SAMN12775866 | SRR10179251 | GCA 009463685.1 | N/A |
| PDT000813966.1 | SAMN12775867 | SAMN12775867 | SRR10179240 | GCA 009463665.1 | N/A |
| PDT000813967.1 | SAMN12775869 | SAMN12775869 | SRR10179218 | GCA 009463705.1 | N/A |
| PDT000813969.1 | SAMN12775861 | SAMN12775861 | SRR10178962 | GCA 009463765.1 | N/A |

|                |              |              |             |                 |     |
|----------------|--------------|--------------|-------------|-----------------|-----|
| PDT000813970.1 | SAMN12775864 | SAMN12775864 | SRR10178929 | GCA 009463795.1 | N/A |
| PDT000813972.1 | SAMN12775862 | SAMN12775862 | SRR10178951 | GCA 009463775.1 | N/A |
| PDT000813974.1 | SAMN12775858 | SAMN12775858 | SRR10178995 | GCA 009463865.1 | N/A |
| PDT000813975.1 | SAMN12775857 | SAMN12775857 | SRR10179006 | GCA 009463875.1 | N/A |
| PDT000813976.1 | SAMN12775859 | SAMN12775859 | SRR10178984 | GCA 009463885.1 | N/A |
| PDT000813978.1 | SAMN12775856 | SAMN12775856 | SRR10179017 | GCA 009463905.1 | N/A |
| PDT000816162.1 | SAMN15689525 | SAMN15689525 | SRR12795815 | GCA 014235225.1 | N/A |
| PDT000816163.1 | SAMN15689524 | SAMN15689524 | SRR12795816 | GCA 014235205.1 | N/A |
| PDT000816164.1 | SAMN15689526 | SAMN15689526 | SRR12795814 | GCA 014235215.1 | N/A |
| PDT000816165.1 | SAMN15689523 | SAMN15689523 | SRR12795817 | GCA 014235275.1 | N/A |
| PDT000821997.1 | SAMN07674819 | SAMN07674819 | SRR6053589  | GCA 015546615.1 | N/A |
| PDT000821998.1 | SAMN07674820 | SAMN07674820 | SRR6053590  | GCA 015546595.1 | N/A |
| PDT000822005.1 | SAMN07674919 | SAMN07674919 | SRR6053597  | GCA 015546375.1 | N/A |
| PDT000822007.1 | SAMN07674844 | SAMN07674844 | SRR6053599  | GCA 015546355.1 | N/A |
| PDT000822008.1 | SAMN07674843 | SAMN07674843 | SRR6053600  | GCA 015546275.1 | N/A |
| PDT000822009.1 | SAMN07674842 | SAMN07674842 | SRR6053601  | GCA 015546155.1 | N/A |
| PDT000822010.1 | SAMN07674841 | SAMN07674841 | SRR6053602  | GCA 015546215.1 | N/A |
| PDT000822011.1 | SAMN07674848 | SAMN07674848 | SRR6053603  | GCA 015546085.1 | N/A |
| PDT000822012.1 | SAMN07674847 | SAMN07674847 | SRR6053604  | GCA 015546135.1 | N/A |
| PDT000822013.1 | SAMN07674846 | SAMN07674846 | SRR6053605  | GCA 015546065.1 | N/A |
| PDT000822014.1 | SAMN07674845 | SAMN07674845 | SRR6053606  | GCA 015546055.1 | N/A |
| PDT000822015.1 | SAMN07674850 | SAMN07674850 | SRR6053607  | GCA 015546095.1 | N/A |
| PDT000822016.1 | SAMN07674849 | SAMN07674849 | SRR6053608  | GCA 015546035.1 | N/A |
| PDT000822018.1 | SAMN07674824 | SAMN07674824 | SRR6053610  | GCA 015545975.1 | N/A |
| PDT000822019.1 | SAMN07674823 | SAMN07674823 | SRR6053611  | GCA 015545995.1 | N/A |
| PDT000822020.1 | SAMN07674822 | SAMN07674822 | SRR6053612  | GCA 015545955.1 | N/A |
| PDT000822021.1 | SAMN07674821 | SAMN07674821 | SRR6053613  | GCA 015545895.1 | N/A |
| PDT000822022.1 | SAMN07674828 | SAMN07674828 | SRR6053614  | GCA 015545935.1 | N/A |
| PDT000822023.1 | SAMN07674827 | SAMN07674827 | SRR6053615  | GCA 015545295.1 | N/A |
| PDT000822024.1 | SAMN07674826 | SAMN07674826 | SRR6053616  | GCA 015544895.1 | N/A |
| PDT000822025.1 | SAMN07674825 | SAMN07674825 | SRR6053617  | GCA 015545715.1 | N/A |
| PDT000822026.1 | SAMN07674830 | SAMN07674830 | SRR6053618  | GCA 015545155.1 | N/A |
| PDT000822027.1 | SAMN07674829 | SAMN07674829 | SRR6053619  | GCA 015545415.1 | N/A |
| PDT000822038.1 | SAMN07674840 | SAMN07674840 | SRR6053630  | GCA 015545675.1 | N/A |
| PDT000822045.1 | SAMN07674934 | SAMN07674934 | SRR6053637  | GCA 015545575.1 | N/A |
| PDT000822048.1 | SAMN07674935 | SAMN07674935 | SRR6053640  | GCA 015545535.1 | N/A |
| PDT000822059.1 | SAMN07674835 | SAMN07674835 | SRR6053651  | GCA 015545255.1 | N/A |
| PDT000822064.1 | SAMN07674808 | SAMN07674808 | SRR6053656  | GCA 015545135.1 | N/A |
| PDT000822065.1 | SAMN07674809 | SAMN07674809 | SRR6053657  | GCA 015544855.1 | N/A |
| PDT000822066.1 | SAMN07674806 | SAMN07674806 | SRR6053658  | GCA 015544715.1 | N/A |
| PDT000822067.1 | SAMN07674807 | SAMN07674807 | SRR6053659  | GCA 015544835.1 | N/A |
| PDT000822068.1 | SAMN07674810 | SAMN07674810 | SRR6053660  | GCA 015544555.1 | N/A |
| PDT000822069.1 | SAMN07674811 | SAMN07674811 | SRR6053661  | GCA 015544755.1 | N/A |
| PDT000822070.1 | SAMN07674837 | SAMN07674837 | SRR6053662  | GCA 015544935.1 | N/A |
| PDT000822071.1 | SAMN07674896 | SAMN07674896 | SRR6053663  | GCA 015545095.1 | N/A |
| PDT000822072.1 | SAMN07674818 | SAMN07674818 | SRR6053664  | GCA 015545075.1 | N/A |
| PDT000822073.1 | SAMN07674817 | SAMN07674817 | SRR6053665  | GCA 015545115.1 | N/A |
| PDT000822074.1 | SAMN07674816 | SAMN07674816 | SRR6053666  | GCA 015545055.1 | N/A |
| PDT000822075.1 | SAMN07674815 | SAMN07674815 | SRR6053667  | GCA 015545015.1 | N/A |
| PDT000822076.1 | SAMN07674814 | SAMN07674814 | SRR6053668  | GCA 015544995.1 | N/A |
| PDT000822077.1 | SAMN07674813 | SAMN07674813 | SRR6053669  | GCA 015544955.1 | N/A |
| PDT000822078.1 | SAMN07674812 | SAMN07674812 | SRR6053670  | GCA 015544875.1 | N/A |
| PDT000822081.1 | SAMN07674839 | SAMN07674839 | SRR6053673  | GCA 015544775.1 | N/A |
| PDT000822082.1 | SAMN07674832 | SAMN07674832 | SRR6053674  | GCA 015544815.1 | N/A |
| PDT000822093.1 | SAMN07674836 | SAMN07674836 | SRR6053685  | GCA 015544455.1 | N/A |
| PDT000822094.1 | SAMN07674833 | SAMN07674833 | SRR6053686  | GCA 015544405.1 | N/A |
| PDT000822096.1 | SAMN07674831 | SAMN07674831 | SRR6053688  | GCA 015544395.1 | N/A |
| PDT000822107.1 | SAMN07674834 | SAMN07674834 | SRR6053699  | GCA 015544215.1 | N/A |
| PDT000822110.1 | SAMN07674914 | SAMN07674914 | SRR6053702  | GCA 015543695.1 | N/A |
| PDT000822111.1 | SAMN07674913 | SAMN07674913 | SRR6053703  | GCA 015543535.1 | N/A |
| PDT000822118.1 | SAMN07674855 | SAMN07674855 | SRR6053710  | GCA 015544075.1 | N/A |
| PDT000822121.1 | SAMN07674936 | SAMN07674936 | SRR6053713  | GCA 015544035.1 | N/A |
| PDT000822122.1 | SAMN07674851 | SAMN07674851 | SRR6053714  | GCA 015544015.1 | N/A |
| PDT000822123.1 | SAMN07674852 | SAMN07674852 | SRR6053715  | GCA 015544055.1 | N/A |
| PDT000822124.1 | SAMN07674853 | SAMN07674853 | SRR6053716  | GCA 015543995.1 | N/A |
| PDT000822125.1 | SAMN07674854 | SAMN07674854 | SRR6053717  | GCA 015543955.1 | N/A |
| PDT000822127.1 | SAMN07674933 | SAMN07674933 | SRR6053719  | GCA 015543895.1 | N/A |
| PDT000822340.1 | SAMEA3484398 | SAMEA3484398 | ERR961622   | GCA 015543075.1 | N/A |

|                |              |              |             |                 |     |
|----------------|--------------|--------------|-------------|-----------------|-----|
| PDT000822345.1 | SAMN03878401 | SAMN03878401 | SRR2106471  | GCA 015543005.1 | N/A |
| PDT000829829.1 | SAMN15660211 | SAMN15660211 | SRR12339019 | GCA 014436675.1 | N/A |
| PDT000852663.1 | SAMN12642268 | SAMN12642268 | SRR11016291 | GCA 014831645.1 | N/A |
| PDT000852665.1 | SAMN12642265 | SAMN12642265 | SRR11016294 | GCA 014831695.1 | N/A |
| PDT000852666.1 | SAMN12642267 | SAMN12642267 | SRR11016292 | GCA 014831715.1 | N/A |
| PDT000852671.1 | SAMN12642261 | SAMN12642261 | SRR11016299 | GCA 014831835.1 | N/A |
| PDT000852673.1 | SAMN12642258 | SAMN12642258 | SRR11016302 | GCA 014831875.1 | N/A |
| PDT000852676.1 | SAMN12642255 | SAMN12642255 | SRR11016305 | GCA 014831935.1 | N/A |
| PDT000852677.1 | SAMN12642252 | SAMN12642252 | SRR11016257 | GCA 014831955.1 | N/A |
| PDT000852678.1 | SAMN12642253 | SAMN12642253 | SRR11016256 | GCA 014831965.1 | N/A |
| PDT000852680.1 | SAMN12642254 | SAMN12642254 | SRR11016254 | GCA 014832015.1 | N/A |
| PDT000852683.1 | SAMN12642248 | SAMN12642248 | SRR11016261 | GCA 014832075.1 | N/A |
| PDT000852684.1 | SAMN12642245 | SAMN12642245 | SRR11016264 | GCA 014832085.1 | N/A |
| PDT000852686.1 | SAMN12642246 | SAMN12642246 | SRR11016263 | GCA 014832115.1 | N/A |
| PDT000852687.1 | SAMN12642244 | SAMN12642244 | SRR11016266 | GCA 014832155.1 | N/A |
| PDT000852688.1 | SAMN12642243 | SAMN12642243 | SRR11016267 | GCA 014832165.1 | N/A |
| PDT000852689.1 | SAMN12642242 | SAMN12642242 | SRR11016268 | GCA 014832175.1 | N/A |
| PDT000852690.1 | SAMN12642240 | SAMN12642240 | SRR11016270 | GCA 014832215.1 | N/A |
| PDT000852691.1 | SAMN12642241 | SAMN12642241 | SRR11016269 | GCA 014832225.1 | N/A |
| PDT000852693.1 | SAMN12642239 | SAMN12642239 | SRR11016271 | GCA 014832255.1 | N/A |
| PDT000852694.1 | SAMN12642237 | SAMN12642237 | SRR11016273 | GCA 014832275.1 | N/A |
| PDT000852695.1 | SAMN12642236 | SAMN12642236 | SRR11016274 | GCA 014832285.1 | N/A |
| PDT000852696.1 | SAMN12642235 | SAMN12642235 | SRR11016275 | GCA 014832335.1 | N/A |
| PDT000852700.1 | SAMN12642232 | SAMN12642232 | SRR11016279 | GCA 014832395.1 | N/A |
| PDT000852701.1 | SAMN12642230 | SAMN12642230 | SRR11016228 | GCA 014832435.1 | N/A |
| PDT000852710.1 | SAMN12642221 | SAMN12642221 | SRR11016238 | GCA 014832595.1 | N/A |
| PDT000852711.1 | SAMN12642220 | SAMN12642220 | SRR11016239 | GCA 014832635.1 | N/A |
| PDT000852713.1 | SAMN12642218 | SAMN12642218 | SRR11016241 | GCA 014832675.1 | N/A |
| PDT000852717.1 | SAMN12642215 | SAMN12642215 | SRR11016244 | GCA 014832755.1 | N/A |
| PDT000852718.1 | SAMN12642211 | SAMN12642211 | SRR11016249 | GCA 014832775.1 | N/A |
| PDT000852719.1 | SAMN12642213 | SAMN12642213 | SRR11016247 | GCA 014832785.1 | N/A |
| PDT000852720.1 | SAMN12642210 | SAMN12642210 | SRR11016250 | GCA 014832815.1 | N/A |
| PDT000852722.1 | SAMN12642212 | SAMN12642212 | SRR11016248 | GCA 014832825.1 | N/A |
| PDT000852723.1 | SAMN12642207 | SAMN12642207 | SRR11016253 | GCA 014832875.1 | N/A |
| PDT000852724.1 | SAMN12642208 | SAMN12642208 | SRR11016252 | GCA 014832895.1 | N/A |
| PDT000852726.1 | SAMN12642206 | SAMN12642206 | SRR11016255 | GCA 014832915.1 | N/A |
| PDT000852727.1 | SAMN12642205 | SAMN12642205 | SRR11016195 | GCA 014832925.1 | N/A |
| PDT000852729.1 | SAMN12642198 | SAMN12642198 | SRR11016203 | GCA 014832985.1 | N/A |
| PDT000852731.1 | SAMN12642203 | SAMN12642203 | SRR11016198 | GCA 014835375.1 | N/A |
| PDT000852732.1 | SAMN12642201 | SAMN12642201 | SRR11016200 | GCA 014835365.1 | N/A |
| PDT000852737.1 | SAMN12642193 | SAMN12642193 | SRR11016209 | GCA 014835475.1 | N/A |
| PDT000852738.1 | SAMN12642195 | SAMN12642195 | SRR11016206 | GCA 014835495.1 | N/A |
| PDT000852740.1 | SAMN12642192 | SAMN12642192 | SRR11016210 | GCA 014835555.1 | N/A |
| PDT000852741.1 | SAMN12642191 | SAMN12642191 | SRR11016211 | GCA 014835575.1 | N/A |
| PDT000852742.1 | SAMN12642189 | SAMN12642189 | SRR11016213 | GCA 014835585.1 | N/A |
| PDT000852743.1 | SAMN12642190 | SAMN12642190 | SRR11016212 | GCA 014835595.1 | N/A |
| PDT000852744.1 | SAMN12642188 | SAMN12642188 | SRR11016214 | GCA 014835615.1 | N/A |
| PDT000852755.1 | SAMN12642174 | SAMN12642174 | SRR11016283 | GCA 014835865.1 | N/A |
| PDT000852756.1 | SAMN12642175 | SAMN12642175 | SRR11016281 | GCA 014835855.1 | N/A |
| PDT000852758.1 | SAMN12642171 | SAMN12642171 | SRR11016286 | GCA 014835915.1 | N/A |
| PDT000852759.1 | SAMN12642172 | SAMN12642172 | SRR11016285 | GCA 014835935.1 | N/A |
| PDT000852761.1 | SAMN12642170 | SAMN12642170 | SRR11016287 | GCA 014835975.1 | N/A |
| PDT000852762.1 | SAMN12642168 | SAMN12642168 | SRR11016289 | GCA 014835985.1 | N/A |
| PDT000852763.1 | SAMN12642167 | SAMN12642167 | SRR11016290 | GCA 014835995.1 | N/A |
| PDT000852765.1 | SAMN12642165 | SAMN12642165 | SRR11016306 | GCA 014836055.1 | N/A |
| PDT000852767.1 | SAMN12642164 | SAMN12642164 | SRR11016265 | GCA 014836085.1 | N/A |
| PDT000852768.1 | SAMN12642162 | SAMN12642162 | SRR11016234 | GCA 014836115.1 | N/A |
| PDT000852769.1 | SAMN12642160 | SAMN12642160 | SRR11016196 | GCA 014836125.1 | N/A |
| PDT000852770.1 | SAMN12642161 | SAMN12642161 | SRR11016245 | GCA 014836145.1 | N/A |
| PDT000852771.1 | SAMN12642158 | SAMN12642158 | SRR11016218 | GCA 014836175.1 | N/A |
| PDT000852772.1 | SAMN12642157 | SAMN12642157 | SRR11016282 | GCA 014836225.1 | N/A |
| PDT000871154.1 | SAMN15541381 | SAMN15541381 | SRR12233407 | GCA 015541385.1 | N/A |
| PDT000871156.1 | SAMN15541379 | SAMN15541379 | SRR12233409 | GCA 015541325.1 | N/A |
| PDT000871157.1 | SAMN15541378 | SAMN15541378 | SRR12233410 | GCA 015541285.1 | N/A |
| PDT000871184.1 | SAMN15541354 | SAMN15541354 | SRR12233437 | GCA 015540965.1 | N/A |
| PDT000871185.1 | SAMN15541353 | SAMN15541353 | SRR12233438 | GCA 015540885.1 | N/A |
| PDT000871194.1 | SAMN15541345 | SAMN15541345 | SRR12233447 | GCA 015541765.1 | N/A |
| PDT000903121.1 | SAMN09401063 | SAMN09401063 | SRR7296868  | GCA 015712285.1 | N/A |

|                |              |              |            |                 |     |
|----------------|--------------|--------------|------------|-----------------|-----|
| PDT000903122.1 | SAMN09401061 | SAMN09401061 | SRR7296870 | GCA 015712295.1 | N/A |
| PDT000903125.1 | SAMN09401062 | SAMN09401062 | SRR7296869 | GCA 015712325.1 | N/A |
| PDT000903126.1 | SAMN09401056 | SAMN09401056 | SRR7297291 | GCA 015712385.1 | N/A |
| PDT000903127.1 | SAMN10689476 | SAMN10689476 | SRR8389083 | GCA 015712705.1 | N/A |
| PDT000903128.1 | SAMN10689475 | SAMN10689475 | SRR8389082 | GCA 015712715.1 | N/A |
| PDT000903129.1 | SAMN10689474 | SAMN10689474 | SRR8389085 | GCA 015712775.1 | N/A |
| PDT000903131.1 | SAMN10689470 | SAMN10689470 | SRR8389104 | GCA 015712815.1 | N/A |
| PDT000903132.1 | SAMN10689473 | SAMN10689473 | SRR8389084 | GCA 015712835.1 | N/A |
| PDT000903134.1 | SAMN10689469 | SAMN10689469 | SRR8389105 | GCA 015712885.1 | N/A |
| PDT000903135.1 | SAMN10689467 | SAMN10689467 | SRR8389103 | GCA 015712905.1 | N/A |
| PDT000903136.1 | SAMN10689466 | SAMN10689466 | SRR8389100 | GCA 015712925.1 | N/A |
| PDT000903137.1 | SAMN10689468 | SAMN10689468 | SRR8389102 | GCA 015712945.1 | N/A |
| PDT000903138.1 | SAMN10689463 | SAMN10689463 | SRR8389099 | GCA 015712965.1 | N/A |
| PDT000903139.1 | SAMN10689465 | SAMN10689465 | SRR8389101 | GCA 015712985.1 | N/A |
| PDT000903140.1 | SAMN10689464 | SAMN10689464 | SRR8389098 | GCA 015713005.1 | N/A |
| PDT000903145.1 | SAMN10689455 | SAMN10689455 | SRR8389033 | GCA 015713105.1 | N/A |
| PDT000903147.1 | SAMN10689457 | SAMN10689457 | SRR8389039 | GCA 015713145.1 | N/A |
| PDT000903148.1 | SAMN10689456 | SAMN10689456 | SRR8389038 | GCA 015713165.1 | N/A |
| PDT000903149.1 | SAMN10689452 | SAMN10689452 | SRR8389034 | GCA 015713185.1 | N/A |
| PDT000903151.1 | SAMN10689451 | SAMN10689451 | SRR8389020 | GCA 015713195.1 | N/A |
| PDT000903152.1 | SAMN10689450 | SAMN10689450 | SRR8389021 | GCA 015713245.1 | N/A |
| PDT000903153.1 | SAMN10689449 | SAMN10689449 | SRR8389018 | GCA 015713265.1 | N/A |
| PDT000903154.1 | SAMN10689448 | SAMN10689448 | SRR8389019 | GCA 015713275.1 | N/A |
| PDT000903155.1 | SAMN10689447 | SAMN10689447 | SRR8389016 | GCA 015713295.1 | N/A |
| PDT000904211.1 | SAMN10689438 | SAMN10689438 | SRR8389052 | GCA 015713385.1 | N/A |
| PDT000904214.1 | SAMN10689436 | SAMN10689436 | SRR8389061 | GCA 015713445.1 | N/A |
| PDT000904220.1 | SAMN10689426 | SAMN10689426 | SRR8389054 | GCA 015713555.1 | N/A |
| PDT000904221.1 | SAMN10689427 | SAMN10689427 | SRR8389055 | GCA 015713575.1 | N/A |
| PDT000904222.1 | SAMN10689425 | SAMN10689425 | SRR8389022 | GCA 015713605.1 | N/A |
| PDT000904223.1 | SAMN10689424 | SAMN10689424 | SRR8389023 | GCA 015713625.1 | N/A |
| PDT000904224.1 | SAMN10689423 | SAMN10689423 | SRR8389024 | GCA 015713645.1 | N/A |
| PDT000904225.1 | SAMN10689419 | SAMN10689419 | SRR8389028 | GCA 015713665.1 | N/A |
| PDT000904226.1 | SAMN10689421 | SAMN10689421 | SRR8389026 | GCA 015713655.1 | N/A |
| PDT000904227.1 | SAMN10689418 | SAMN10689418 | SRR8389029 | GCA 015713705.1 | N/A |
| PDT000904228.1 | SAMN10689417 | SAMN10689417 | SRR8389030 | GCA 015713715.1 | N/A |
| PDT000904229.1 | SAMN10689416 | SAMN10689416 | SRR8389031 | GCA 015713745.1 | N/A |
| PDT000904239.1 | SAMN10689396 | SAMN10689396 | SRR8389071 | GCA 015713945.1 | N/A |
| PDT000904241.1 | SAMN10689395 | SAMN10689395 | SRR8389065 | GCA 015713965.1 | N/A |
| PDT000904242.1 | SAMN10689398 | SAMN10689398 | SRR8389070 | GCA 015713975.1 | N/A |
| PDT000904243.1 | SAMN10689394 | SAMN10689394 | SRR8389062 | GCA 015714025.1 | N/A |
| PDT000904245.1 | SAMN10689391 | SAMN10689391 | SRR8389068 | GCA 015714065.1 | N/A |
| PDT000904247.1 | SAMN10689390 | SAMN10689390 | SRR8389069 | GCA 015714085.1 | N/A |
| PDT000904251.1 | SAMN10689386 | SAMN10689386 | SRR8389107 | GCA 015714175.1 | N/A |
| PDT000904252.1 | SAMN10689382 | SAMN10689382 | SRR8389110 | GCA 015714205.1 | N/A |
| PDT000904253.1 | SAMN10689379 | SAMN10689379 | SRR8389115 | GCA 015714225.1 | N/A |
| PDT000904256.1 | SAMN10689376 | SAMN10689376 | SRR8389112 | GCA 015714285.1 | N/A |
| PDT000904257.1 | SAMN10689374 | SAMN10689374 | SRR8389095 | GCA 015714315.1 | N/A |
| PDT000904258.1 | SAMN10689375 | SAMN10689375 | SRR8389094 | GCA 015714305.1 | N/A |
| PDT000904259.1 | SAMN10689372 | SAMN10689372 | SRR8389091 | GCA 015714345.1 | N/A |
| PDT000904261.1 | SAMN10689366 | SAMN10689366 | SRR8389089 | GCA 015714365.1 | N/A |
| PDT000904262.1 | SAMN10689360 | SAMN10689360 | SRR8389050 | GCA 015714405.1 | N/A |
| PDT000904264.1 | SAMN10689356 | SAMN10689356 | SRR8389046 | GCA 015714445.1 | N/A |
| PDT000904265.1 | SAMN10689357 | SAMN10689357 | SRR8389047 | GCA 015714455.1 | N/A |
| PDT000904266.1 | SAMN10689359 | SAMN10689359 | SRR8389045 | GCA 015714475.1 | N/A |
| PDT000904267.1 | SAMN10689355 | SAMN10689355 | SRR8389003 | GCA 015714505.1 | N/A |
| PDT000904268.1 | SAMN10689354 | SAMN10689354 | SRR8389002 | GCA 015714515.1 | N/A |
| PDT000904270.1 | SAMN10689350 | SAMN10689350 | SRR8389010 | GCA 015714565.1 | N/A |
| PDT000904272.1 | SAMN10689347 | SAMN10689347 | SRR8389004 | GCA 015714605.1 | N/A |
| PDT000904273.1 | SAMN10689346 | SAMN10689346 | SRR8389007 | GCA 015714615.1 | N/A |
| PDT000904274.1 | SAMN10689345 | SAMN10689345 | SRR8389006 | GCA 015714625.1 | N/A |
| PDT000904275.1 | SAMN09401057 | SAMN09401057 | SRR7297276 | GCA 015714825.1 | N/A |
| PDT000904277.1 | SAMN09401052 | SAMN09401052 | SRR7297287 | GCA 015714885.1 | N/A |
| PDT000904278.1 | SAMN09401055 | SAMN09401055 | SRR7297290 | GCA 015714895.1 | N/A |
| PDT000904281.1 | SAMN09401050 | SAMN09401050 | SRR7297285 | GCA 015714965.1 | N/A |
| PDT000904283.1 | SAMN09401049 | SAMN09401049 | SRR7297284 | GCA 015714995.1 | N/A |
| PDT000904284.1 | SAMN09401048 | SAMN09401048 | SRR7297362 | GCA 015715005.1 | N/A |
| PDT000904285.1 | SAMN09401047 | SAMN09401047 | SRR7297361 | GCA 015715035.1 | N/A |
| PDT000904287.1 | SAMN09401044 | SAMN09401044 | SRR7297394 | GCA 015715075.1 | N/A |



|                |              |              |            |                 |     |
|----------------|--------------|--------------|------------|-----------------|-----|
| PDT000904288.1 | SAMN09401043 | SAMN09401043 | SRR7297393 | GCA 015715085.1 | N/A |
| PDT000904289.1 | SAMN09401045 | SAMN09401045 | SRR7297391 | GCA 015715095.1 | N/A |
| PDT000904290.1 | SAMN09401042 | SAMN09401042 | SRR7297376 | GCA 015715145.1 | N/A |
| PDT000904291.1 | SAMN09401038 | SAMN09401038 | SRR7296952 | GCA 015715165.1 | N/A |
| PDT000904292.1 | SAMN09401040 | SAMN09401040 | SRR7297390 | GCA 015715185.1 | N/A |
| PDT000904293.1 | SAMN09401041 | SAMN09401041 | SRR7296768 | GCA 015715195.1 | N/A |
| PDT000904294.1 | SAMN09401039 | SAMN09401039 | SRR7297389 | GCA 015715205.1 | N/A |
| PDT000904295.1 | SAMN09401037 | SAMN09401037 | SRR7296953 | GCA 015715245.1 | N/A |
| PDT000904298.1 | SAMN09401032 | SAMN09401032 | SRR7296957 | GCA 015715295.1 | N/A |
| PDT000904302.1 | SAMN09401028 | SAMN09401028 | SRR7297575 | GCA 015715385.1 | N/A |
| PDT000904303.1 | SAMN09401027 | SAMN09401027 | SRR7297574 | GCA 015715375.1 | N/A |
| PDT000904305.1 | SAMN09401029 | SAMN09401029 | SRR7296956 | GCA 015715435.1 | N/A |
| PDT000904306.1 | SAMN09401025 | SAMN09401025 | SRR7297568 | GCA 015715465.1 | N/A |
| PDT000904307.1 | SAMN09401026 | SAMN09401026 | SRR7297569 | GCA 015715475.1 | N/A |
| PDT000904308.1 | SAMN09401024 | SAMN09401024 | SRR7297567 | GCA 015715505.1 | N/A |
| PDT000904309.1 | SAMN09401023 | SAMN09401023 | SRR7297566 | GCA 015715515.1 | N/A |
| PDT000904313.1 | SAMN09401019 | SAMN09401019 | SRR7297570 | GCA 015715605.1 | N/A |
| PDT000904316.1 | SAMN09401014 | SAMN09401014 | SRR7297243 | GCA 015715665.1 | N/A |
| PDT000904317.1 | SAMN09401015 | SAMN09401015 | SRR7297242 | GCA 015715685.1 | N/A |
| PDT000904319.1 | SAMN09401013 | SAMN09401013 | SRR7297244 | GCA 015715715.1 | N/A |
| PDT000904322.1 | SAMN09401008 | SAMN09401008 | SRR7296872 | GCA 015715775.1 | N/A |
| PDT000904323.1 | SAMN09401006 | SAMN09401006 | SRR7296874 | GCA 015715805.1 | N/A |
| PDT000904325.1 | SAMN09401004 | SAMN09401004 | SRR7296876 | GCA 015715845.1 | N/A |
| PDT000904326.1 | SAMN09401005 | SAMN09401005 | SRR7296873 | GCA 015715865.1 | N/A |
| PDT000904329.1 | SAMN09401002 | SAMN09401002 | SRR7296878 | GCA 015715925.1 | N/A |
| PDT000904330.1 | SAMN09400998 | SAMN09400998 | SRR7297464 | GCA 015715945.1 | N/A |
| PDT000904332.1 | SAMN09400997 | SAMN09400997 | SRR7297465 | GCA 015715965.1 | N/A |
| PDT000904334.1 | SAMN09400996 | SAMN09400996 | SRR7297470 | GCA 015716025.1 | N/A |
| PDT000904335.1 | SAMN09400995 | SAMN09400995 | SRR7297471 | GCA 015716045.1 | N/A |
| PDT000904338.1 | SAMN09400993 | SAMN09400993 | SRR7297469 | GCA 015716095.1 | N/A |
| PDT000904341.1 | SAMN09400989 | SAMN09400989 | SRR7297473 | GCA 015716165.1 | N/A |
| PDT000904343.1 | SAMN09400986 | SAMN09400986 | SRR7297164 | GCA 015716185.1 | N/A |
| PDT000904346.1 | SAMN09400983 | SAMN09400983 | SRR7297161 | GCA 015716265.1 | N/A |
| PDT000904348.1 | SAMN09400981 | SAMN09400981 | SRR7297159 | GCA 015716305.1 | N/A |
| PDT000904349.1 | SAMN09400979 | SAMN09400979 | SRR7297157 | GCA 015716315.1 | N/A |
| PDT000904351.1 | SAMN09400978 | SAMN09400978 | SRR7297416 | GCA 015716335.1 | N/A |
| PDT000904352.1 | SAMN09400977 | SAMN09400977 | SRR7297417 | GCA 015716385.1 | N/A |
| PDT000904353.1 | SAMN09400974 | SAMN09400974 | SRR7297408 | GCA 015716405.1 | N/A |
| PDT000904355.1 | SAMN09400972 | SAMN09400972 | SRR7297410 | GCA 015716415.1 | N/A |
| PDT000904357.1 | SAMN09400970 | SAMN09400970 | SRR7297412 | GCA 015716495.1 | N/A |
| PDT000904358.1 | SAMN09400969 | SAMN09400969 | SRR7297413 | GCA 015716505.1 | N/A |
| PDT000904359.1 | SAMN09400971 | SAMN09400971 | SRR7297411 | GCA 015716485.1 | N/A |
| PDT000904363.1 | SAMN09400963 | SAMN09400963 | SRR7296985 | GCA 015716605.1 | N/A |
| PDT000904364.1 | SAMN09400964 | SAMN09400964 | SRR7296986 | GCA 015716595.1 | N/A |
| PDT000904367.1 | SAMN09400960 | SAMN09400960 | SRR7296982 | GCA 015716695.1 | N/A |
| PDT000904369.1 | SAMN09400959 | SAMN09400959 | SRR7296981 | GCA 015716705.1 | N/A |
| PDT000904370.1 | SAMN09400957 | SAMN09400957 | SRR7297591 | GCA 015716745.1 | N/A |
| PDT000904371.1 | SAMN09400956 | SAMN09400956 | SRR7297588 | GCA 015716755.1 | N/A |
| PDT000904372.1 | SAMN09400953 | SAMN09400953 | SRR7297587 | GCA 015716785.1 | N/A |
| PDT000904375.1 | SAMN09400955 | SAMN09400955 | SRR7297589 | GCA 015716835.1 | N/A |
| PDT000904376.1 | SAMN09400952 | SAMN09400952 | SRR7297584 | GCA 015716865.1 | N/A |
| PDT000904377.1 | SAMN09400949 | SAMN09400949 | SRR7297583 | GCA 015716885.1 | N/A |
| PDT000904380.1 | SAMN09400948 | SAMN09400948 | SRR7297232 | GCA 015716945.1 | N/A |
| PDT000904381.1 | SAMN09400947 | SAMN09400947 | SRR7297233 | GCA 015716955.1 | N/A |
| PDT000904383.1 | SAMN09400944 | SAMN09400944 | SRR7297224 | GCA 015716995.1 | N/A |
| PDT000904386.1 | SAMN09400939 | SAMN09400939 | SRR7297229 | GCA 015717065.1 | N/A |
| PDT000904387.1 | SAMN09400937 | SAMN09400937 | SRR7297542 | GCA 015717085.1 | N/A |
| PDT000904388.1 | SAMN09400941 | SAMN09400941 | SRR7297231 | GCA 015717095.1 | N/A |
| PDT000904390.1 | SAMN09400938 | SAMN09400938 | SRR7297543 | GCA 015717145.1 | N/A |
| PDT000904393.1 | SAMN09400935 | SAMN09400935 | SRR7297534 | GCA 015717195.1 | N/A |
| PDT000904394.1 | SAMN09400934 | SAMN09400934 | SRR7297537 | GCA 015717205.1 | N/A |
| PDT000904397.1 | SAMN09400930 | SAMN09400930 | SRR7297541 | GCA 015717275.1 | N/A |
| PDT000904398.1 | SAMN09400922 | SAMN09400922 | SRR7297596 | GCA 015717305.1 | N/A |
| PDT000904399.1 | SAMN09400925 | SAMN09400925 | SRR7297593 | GCA 015717325.1 | N/A |
| PDT000904401.1 | SAMN09400920 | SAMN09400920 | SRR7297303 | GCA 015717355.1 | N/A |
| PDT000904402.1 | SAMN09400921 | SAMN09400921 | SRR7297597 | GCA 015717375.1 | N/A |
| PDT000904403.1 | SAMN09400919 | SAMN09400919 | SRR7297599 | GCA 015717395.1 | N/A |
| PDT000904404.1 | SAMN09400918 | SAMN09400918 | SRR7296992 | GCA 015717425.1 | N/A |

|                |              |              |             |                 |     |
|----------------|--------------|--------------|-------------|-----------------|-----|
| PDT000904407.1 | SAMN09400928 | SAMN09400928 | SRR7297578  | GCA 015717485.1 | N/A |
| PDT000904408.1 | SAMN09400929 | SAMN09400929 | SRR7297540  | GCA 015717505.1 | N/A |
| PDT000904409.1 | SAMN09400926 | SAMN09400926 | SRR7297592  | GCA 015717515.1 | N/A |
| PDT000904410.1 | SAMN09400927 | SAMN09400927 | SRR7297579  | GCA 015717525.1 | N/A |
| PDT000904412.1 | SAMN09400915 | SAMN09400915 | SRR7296999  | GCA 015717585.1 | N/A |
| PDT000904413.1 | SAMN09400924 | SAMN09400924 | SRR7297594  | GCA 015717595.1 | N/A |
| PDT000904414.1 | SAMN09400913 | SAMN09400913 | SRR7296997  | GCA 015717625.1 | N/A |
| PDT000904415.1 | SAMN09400914 | SAMN09400914 | SRR7296998  | GCA 015717635.1 | N/A |
| PDT000904417.1 | SAMN09400910 | SAMN09400910 | SRR7296994  | GCA 015717675.1 | N/A |
| PDT000904418.1 | SAMN09400909 | SAMN09400909 | SRR7296993  | GCA 015717705.1 | N/A |
| PDT000904419.1 | SAMN09400908 | SAMN09400908 | SRR7296846  | GCA 015717725.1 | N/A |
| PDT000904420.1 | SAMN09400911 | SAMN09400911 | SRR7296995  | GCA 015717735.1 | N/A |
| PDT000904421.1 | SAMN09400906 | SAMN09400906 | SRR7296844  | GCA 015717765.1 | N/A |
| PDT000904422.1 | SAMN09400905 | SAMN09400905 | SRR7296845  | GCA 015717785.1 | N/A |
| PDT000904426.1 | SAMN09400901 | SAMN09400901 | SRR7296841  | GCA 015717855.1 | N/A |
| PDT000904427.1 | SAMN09400898 | SAMN09400898 | SRR7296934  | GCA 015717885.1 | N/A |
| PDT000904428.1 | SAMN09400899 | SAMN09400899 | SRR7296839  | GCA 015717895.1 | N/A |
| PDT000904430.1 | SAMN09400900 | SAMN09400900 | SRR7296838  | GCA 015717925.1 | N/A |
| PDT000904431.1 | SAMN09400896 | SAMN09400896 | SRR7296921  | GCA 015717945.1 | N/A |
| PDT000904433.1 | SAMN09400895 | SAMN09400895 | SRR7297253  | GCA 015718005.1 | N/A |
| PDT000904435.1 | SAMN13622114 | SAMN13622114 | SRR10728127 | GCA 015724175.1 | N/A |
| PDT000904438.1 | SAMN13622109 | SAMN13622109 | SRR10728132 | GCA 015724225.1 | N/A |
| PDT000904439.1 | SAMN13622111 | SAMN13622111 | SRR10728130 | GCA 015724265.1 | N/A |
| PDT000904440.1 | SAMN13622110 | SAMN13622110 | SRR10728131 | GCA 015724275.1 | N/A |
| PDT000904441.1 | SAMN13622106 | SAMN13622106 | SRR10728136 | GCA 015724305.1 | N/A |
| PDT000904442.1 | SAMN13622105 | SAMN13622105 | SRR10728137 | GCA 015724325.1 | N/A |
| PDT000904443.1 | SAMN13622104 | SAMN13622104 | SRR10728138 | GCA 015724345.1 | N/A |
| PDT000904445.1 | SAMN13622108 | SAMN13622108 | SRR10728133 | GCA 015724335.1 | N/A |
| PDT000904446.1 | SAMN13622103 | SAMN13622103 | SRR10728139 | GCA 015724405.1 | N/A |
| PDT000904447.1 | SAMN13622101 | SAMN13622101 | SRR10728141 | GCA 015724415.1 | N/A |
| PDT000904448.1 | SAMN13622100 | SAMN13622100 | SRR10728142 | GCA 015724445.1 | N/A |
| PDT000904449.1 | SAMN13622102 | SAMN13622102 | SRR10728140 | GCA 015724425.1 | N/A |
| PDT000904450.1 | SAMN13622099 | SAMN13622099 | SRR10728143 | GCA 015724455.1 | N/A |
| PDT000904452.1 | SAMN13622096 | SAMN13622096 | SRR10728148 | GCA 015724515.1 | N/A |
| PDT000904454.1 | SAMN13622095 | SAMN13622095 | SRR10728149 | GCA 015724565.1 | N/A |
| PDT000904455.1 | SAMN13622092 | SAMN13622092 | SRR10728152 | GCA 015724585.1 | N/A |
| PDT000904459.1 | SAMN13622091 | SAMN13622091 | SRR10728153 | GCA 015724655.1 | N/A |
| PDT000904461.1 | SAMN13622090 | SAMN13622090 | SRR10728154 | GCA 015724705.1 | N/A |
| PDT000904462.1 | SAMN13622089 | SAMN13622089 | SRR10728155 | GCA 015724725.1 | N/A |
| PDT000904463.1 | SAMN13622085 | SAMN13622085 | SRR10728160 | GCA 015724745.1 | N/A |
| PDT000904464.1 | SAMN13622084 | SAMN13622084 | SRR10728161 | GCA 015724755.1 | N/A |
| PDT000904465.1 | SAMN13622086 | SAMN13622086 | SRR10728159 | GCA 015724765.1 | N/A |
| PDT000904466.1 | SAMN13622083 | SAMN13622083 | SRR10728162 | GCA 015724805.1 | N/A |
| PDT000904469.1 | SAMN13622079 | SAMN13622079 | SRR10728166 | GCA 015724855.1 | N/A |
| PDT000904470.1 | SAMN13622080 | SAMN13622080 | SRR10728165 | GCA 015724885.1 | N/A |
| PDT000904471.1 | SAMN13622077 | SAMN13622077 | SRR10728169 | GCA 015724905.1 | N/A |
| PDT000904472.1 | SAMN13622078 | SAMN13622078 | SRR10728167 | GCA 015724915.1 | N/A |
| PDT000904473.1 | SAMN13622076 | SAMN13622076 | SRR10728170 | GCA 015724935.1 | N/A |
| PDT000904474.1 | SAMN13622075 | SAMN13622075 | SRR10728171 | GCA 015724965.1 | N/A |
| PDT000904475.1 | SAMN13622074 | SAMN13622074 | SRR10728172 | GCA 015724975.1 | N/A |
| PDT000904476.1 | SAMN13622072 | SAMN13622072 | SRR10728174 | GCA 015725015.1 | N/A |
| PDT000904477.1 | SAMN13622071 | SAMN13622071 | SRR10728175 | GCA 015725005.1 | N/A |
| PDT000904478.1 | SAMN13622073 | SAMN13622073 | SRR10728173 | GCA 015725025.1 | N/A |
| PDT000904479.1 | SAMN13622069 | SAMN13622069 | SRR10728177 | GCA 015725075.1 | N/A |
| PDT000904480.1 | SAMN13622070 | SAMN13622070 | SRR10728176 | GCA 015725065.1 | N/A |
| PDT000904481.1 | SAMN12220534 | SAMN12220534 | SRR9647400  | GCA 015725115.1 | N/A |
| PDT000904482.1 | SAMN12220535 | SAMN12220535 | SRR9647393  | GCA 015725125.1 | N/A |
| PDT000904483.1 | SAMN12220536 | SAMN12220536 | SRR9647394  | GCA 015725105.1 | N/A |
| PDT000904484.1 | SAMN12220533 | SAMN12220533 | SRR9647399  | GCA 015725165.1 | N/A |
| PDT000904485.1 | SAMN12220532 | SAMN12220532 | SRR9647398  | GCA 015725175.1 | N/A |
| PDT000904487.1 | SAMN12220529 | SAMN12220529 | SRR9647403  | GCA 015725225.1 | N/A |
| PDT000904488.1 | SAMN12220528 | SAMN12220528 | SRR9647402  | GCA 015725235.1 | N/A |
| PDT000904489.1 | SAMN12220527 | SAMN12220527 | SRR9647401  | GCA 015725245.1 | N/A |
| PDT000904490.1 | SAMN12220530 | SAMN12220530 | SRR9647404  | GCA 015725255.1 | N/A |
| PDT000904491.1 | SAMN12220526 | SAMN12220526 | SRR9647535  | GCA 015725305.1 | N/A |
| PDT000904492.1 | SAMN12220523 | SAMN12220523 | SRR9647546  | GCA 015725325.1 | N/A |
| PDT000904493.1 | SAMN12220524 | SAMN12220524 | SRR9647545  | GCA 015725345.1 | N/A |
| PDT000904494.1 | SAMN12220525 | SAMN12220525 | SRR9647536  | GCA 015725355.1 | N/A |

|                |              |              |             |                 |     |
|----------------|--------------|--------------|-------------|-----------------|-----|
| PDT000904495.1 | SAMN12220522 | SAMN12220522 | SRR9647547  | GCA 015725365.1 | N/A |
| PDT000904497.1 | SAMN12220520 | SAMN12220520 | SRR9647541  | GCA 015725425.1 | N/A |
| PDT000904498.1 | SAMN12220518 | SAMN12220518 | SRR9647543  | GCA 015725445.1 | N/A |
| PDT000904500.1 | SAMN12220519 | SAMN12220519 | SRR9647542  | GCA 015725465.1 | N/A |
| PDT000904501.1 | SAMN12220515 | SAMN12220515 | SRR9647726  | GCA 015725515.1 | N/A |
| PDT000904503.1 | SAMN12220513 | SAMN12220513 | SRR9647733  | GCA 015725555.1 | N/A |
| PDT000904504.1 | SAMN13622068 | SAMN13622068 | SRR10728178 | GCA 015725545.1 | N/A |
| PDT000904506.1 | SAMN12220510 | SAMN12220510 | SRR9647730  | GCA 015725595.1 | N/A |
| PDT000904507.1 | SAMN12220511 | SAMN12220511 | SRR9647735  | GCA 015725635.1 | N/A |
| PDT000904508.1 | SAMN12220512 | SAMN12220512 | SRR9647736  | GCA 015725625.1 | N/A |
| PDT000904510.1 | SAMN12220507 | SAMN12220507 | SRR9647731  | GCA 015725675.1 | N/A |
| PDT000904512.1 | SAMN12220504 | SAMN12220504 | SRR9647377  | GCA 015725725.1 | N/A |
| PDT000904514.1 | SAMN12220506 | SAMN12220506 | SRR9647369  | GCA 015725735.1 | N/A |
| PDT000904515.1 | SAMN12220502 | SAMN12220502 | SRR9647375  | GCA 015725765.1 | N/A |
| PDT000904516.1 | SAMN12220501 | SAMN12220501 | SRR9647376  | GCA 015725805.1 | N/A |
| PDT000904518.1 | SAMN12220498 | SAMN12220498 | SRR9647371  | GCA 015725835.1 | N/A |
| PDT000904519.1 | SAMN12220499 | SAMN12220499 | SRR9647374  | GCA 015725845.1 | N/A |
| PDT000904520.1 | SAMN12220500 | SAMN12220500 | SRR9647373  | GCA 015725865.1 | N/A |
| PDT000904523.1 | SAMN12220490 | SAMN12220490 | SRR9647293  | GCA 015725945.1 | N/A |
| PDT000904524.1 | SAMN12220493 | SAMN12220493 | SRR9647470  | GCA 015725965.1 | N/A |
| PDT000904525.1 | SAMN12220494 | SAMN12220494 | SRR9647471  | GCA 015725955.1 | N/A |
| PDT000904526.1 | SAMN12220492 | SAMN12220492 | SRR9647469  | GCA 015725975.1 | N/A |
| PDT000904530.1 | SAMN12220485 | SAMN12220485 | SRR9647592  | GCA 015726075.1 | N/A |
| PDT000904531.1 | SAMN12220486 | SAMN12220486 | SRR9647591  | GCA 015726085.1 | N/A |
| PDT000904533.1 | SAMN12220484 | SAMN12220484 | SRR9647593  | GCA 015726145.1 | N/A |
| PDT000904534.1 | SAMN12220481 | SAMN12220481 | SRR9647596  | GCA 015726175.1 | N/A |
| PDT000904535.1 | SAMN11285112 | SAMN11285112 | SRR8809818  | GCA 015726165.1 | N/A |
| PDT000904536.1 | SAMN12220483 | SAMN12220483 | SRR9647594  | GCA 015726215.1 | N/A |
| PDT000904537.1 | SAMN12220482 | SAMN12220482 | SRR9647595  | GCA 015726205.1 | N/A |
| PDT000904539.1 | SAMN11285111 | SAMN11285111 | SRR8810183  | GCA 015726265.1 | N/A |
| PDT000904540.1 | SAMN11285108 | SAMN11285108 | SRR8810615  | GCA 015726285.1 | N/A |
| PDT000904541.1 | SAMN11285109 | SAMN11285109 | SRR8809874  | GCA 015726275.1 | N/A |
| PDT000904543.1 | SAMN11285107 | SAMN11285107 | SRR8810293  | GCA 015726335.1 | N/A |
| PDT000904544.1 | SAMN11285103 | SAMN11285103 | SRR8809814  | GCA 015726375.1 | N/A |
| PDT000904545.1 | SAMN11285104 | SAMN11285104 | SRR8809809  | GCA 015726365.1 | N/A |
| PDT000904546.1 | SAMN11285101 | SAMN11285101 | SRR8809879  | GCA 015726395.1 | N/A |
| PDT000904549.1 | SAMN11285098 | SAMN11285098 | SRR8810003  | GCA 015726455.1 | N/A |
| PDT000904550.1 | SAMN11285099 | SAMN11285099 | SRR8809911  | GCA 015726485.1 | N/A |
| PDT000904553.1 | SAMN11285096 | SAMN11285096 | SRR8809866  | GCA 015726545.1 | N/A |
| PDT000904555.1 | SAMN11285092 | SAMN11285092 | SRR8809956  | GCA 015726585.1 | N/A |
| PDT000904556.1 | SAMN11285091 | SAMN11285091 | SRR8810305  | GCA 015726605.1 | N/A |
| PDT000904558.1 | SAMN11285093 | SAMN11285093 | SRR8810544  | GCA 015726635.1 | N/A |
| PDT000904559.1 | SAMN11285090 | SAMN11285090 | SRR8810563  | GCA 015726645.1 | N/A |
| PDT000904562.1 | SAMN11285086 | SAMN11285086 | SRR8810385  | GCA 015726715.1 | N/A |
| PDT000904563.1 | SAMN11285085 | SAMN11285085 | SRR8810382  | GCA 015726735.1 | N/A |
| PDT000904565.1 | SAMN11285084 | SAMN11285084 | SRR8809772  | GCA 015726825.1 | N/A |
| PDT000904566.1 | SAMN11285083 | SAMN11285083 | SRR8810146  | GCA 015726845.1 | N/A |
| PDT000904567.1 | SAMN11285082 | SAMN11285082 | SRR8810517  | GCA 015726885.1 | N/A |
| PDT000904568.1 | SAMN11285079 | SAMN11285079 | SRR8810189  | GCA 015726925.1 | N/A |
| PDT000904569.1 | SAMN11285080 | SAMN11285080 | SRR8810192  | GCA 015726935.1 | N/A |
| PDT000904571.1 | SAMN11285078 | SAMN11285078 | SRR8810643  | GCA 015726975.1 | N/A |
| PDT000904572.1 | SAMN11285077 | SAMN11285077 | SRR8810624  | GCA 015726985.1 | N/A |
| PDT000904573.1 | SAMN11285076 | SAMN11285076 | SRR8810186  | GCA 015727025.1 | N/A |
| PDT000904574.1 | SAMN11285074 | SAMN11285074 | SRR8810185  | GCA 015727045.1 | N/A |
| PDT000904576.1 | SAMN11285075 | SAMN11285075 | SRR8810080  | GCA 015727075.1 | N/A |
| PDT000904578.1 | SAMN11285073 | SAMN11285073 | SRR8810187  | GCA 015727115.1 | N/A |
| PDT000904579.1 | SAMN11285070 | SAMN11285070 | SRR8810456  | GCA 015727135.1 | N/A |
| PDT000904580.1 | SAMN11285069 | SAMN11285069 | SRR8810449  | GCA 015727185.1 | N/A |
| PDT000904581.1 | SAMN11285068 | SAMN11285068 | SRR8810450  | GCA 015727165.1 | N/A |
| PDT000904582.1 | SAMN11285067 | SAMN11285067 | SRR8810101  | GCA 015727175.1 | N/A |
| PDT000904584.1 | SAMN11285066 | SAMN11285066 | SRR8810464  | GCA 015727245.1 | N/A |
| PDT000904585.1 | SAMN11285062 | SAMN11285062 | SRR8810452  | GCA 015727255.1 | N/A |
| PDT000904587.1 | SAMN11285060 | SAMN11285060 | SRR8810020  | GCA 015727305.1 | N/A |
| PDT000904589.1 | SAMN11285058 | SAMN11285058 | SRR8810022  | GCA 015727345.1 | N/A |
| PDT000904591.1 | SAMN11285059 | SAMN11285059 | SRR8810178  | GCA 015727395.1 | N/A |
| PDT000904593.1 | SAMN11285057 | SAMN11285057 | SRR8810233  | GCA 015727385.1 | N/A |
| PDT000904596.1 | SAMN11285053 | SAMN11285053 | SRR8810259  | GCA 015727485.1 | N/A |
| PDT000904600.1 | SAMN11285051 | SAMN11285051 | SRR8809979  | GCA 015727505.1 | N/A |

|                |               |               |             |                 |                |
|----------------|---------------|---------------|-------------|-----------------|----------------|
| PDT000904601.1 | SAMN11285048  | SAMN11285048  | SRR8810623  | GCA 015727585.1 | N/A            |
| PDT000904602.1 | SAMN11285045  | SAMN11285045  | SRR8810551  | GCA 015727595.1 | N/A            |
| PDT000904604.1 | SAMN11285044  | SAMN11285044  | SRR8810247  | GCA 015727635.1 | N/A            |
| PDT000904606.1 | SAMN11285043  | SAMN11285043  | SRR8810560  | GCA 015727695.1 | N/A            |
| PDT000904608.1 | SAMN10435808  | SAMN10435808  | SRR8198806  | GCA 015727725.1 | N/A            |
| PDT000904609.1 | SAMN10435806  | SAMN10435806  | SRR8199318  | GCA 015727735.1 | N/A            |
| PDT000904611.1 | SAMN10435807  | SAMN10435807  | SRR8199317  | GCA 015727755.1 | N/A            |
| PDT000904613.1 | SAMN10435804  | SAMN10435804  | SRR8199308  | GCA 015727815.1 | N/A            |
| PDT000904614.1 | SAMN10435800  | SAMN10435800  | SRR8199312  | GCA 015727845.1 | N/A            |
| PDT000904616.1 | SAMN10435801  | SAMN10435801  | SRR8199311  | GCA 015727885.1 | N/A            |
| PDT000904617.1 | SAMN10435798  | SAMN10435798  | SRR8199310  | GCA 015727895.1 | N/A            |
| PDT000904618.1 | SAMN10435797  | SAMN10435797  | SRR8199681  | GCA 015727925.1 | N/A            |
| PDT000904619.1 | SAMN10435799  | SAMN10435799  | SRR8199309  | GCA 015727935.1 | N/A            |
| PDT000904620.1 | SAMN10435795  | SAMN10435795  | SRR8199671  | GCA 015727955.1 | N/A            |
| PDT000904622.1 | SAMN10435796  | SAMN10435796  | SRR8199680  | GCA 015727975.1 | N/A            |
| PDT000904625.1 | SAMN10435791  | SAMN10435791  | SRR8199675  | GCA 015728065.1 | N/A            |
| PDT000904627.1 | SAMN10435790  | SAMN10435790  | SRR8199674  | GCA 015728105.1 | N/A            |
| PDT000904628.1 | SAMN10435787  | SAMN10435787  | SRR8199053  | GCA 015728115.1 | N/A            |
| PDT000904629.1 | SAMN10435788  | SAMN10435788  | SRR8199676  | GCA 015728155.1 | N/A            |
| PDT000904631.1 | SAMN10435783  | SAMN10435783  | SRR8199065  | GCA 015728175.1 | N/A            |
| PDT000904633.1 | SAMN10435786  | SAMN10435786  | SRR8199052  | GCA 015728215.1 | N/A            |
| PDT000904634.1 | SAMN11285042  | SAMN11285042  | SRR8809839  | GCA 015728245.1 | N/A            |
| PDT000904635.1 | SAMN10435780  | SAMN10435780  | SRR8199062  | GCA 015728275.1 | N/A            |
| PDT000904636.1 | SAMN10435781  | SAMN10435781  | SRR8199063  | GCA 015728265.1 | N/A            |
| PDT000904637.1 | SAMN10435779  | SAMN10435779  | SRR8199061  | GCA 015728285.1 | N/A            |
| PDT000904644.1 | SAMN10435773  | SAMN10435773  | SRR8199654  | GCA 015728435.1 | N/A            |
| PDT000904648.1 | SAMN10435772  | SAMN10435772  | SRR8199655  | GCA 015728505.1 | N/A            |
| PDT000904649.1 | SAMN09401105  | SAMN09401105  | SRR7297364  | GCA 015728545.1 | N/A            |
| PDT000904652.1 | SAMN09401102  | SAMN09401102  | SRR7297359  | GCA 015728605.1 | N/A            |
| PDT000904653.1 | SAMN09401099  | SAMN09401099  | SRR7297017  | GCA 015728625.1 | N/A            |
| PDT000904655.1 | SAMN09401103  | SAMN09401103  | SRR7297366  | GCA 015728635.1 | N/A            |
| PDT000904657.1 | SAMN09401100  | SAMN09401100  | SRR7296938  | GCA 015728695.1 | N/A            |
| PDT000904658.1 | SAMN09401097  | SAMN09401097  | SRR7297136  | GCA 015728735.1 | N/A            |
| PDT000904659.1 | SAMN09401094  | SAMN09401094  | SRR7296885  | GCA 015728755.1 | N/A            |
| PDT000904660.1 | SAMN09401096  | SAMN09401096  | SRR7296969  | GCA 015728725.1 | N/A            |
| PDT000904665.1 | SAMN09401089  | SAMN09401089  | SRR7296973  | GCA 015728845.1 | N/A            |
| PDT000904666.1 | SAMN09401088  | SAMN09401088  | SRR7297447  | GCA 015728895.1 | N/A            |
| PDT000904668.1 | SAMN09401087  | SAMN09401087  | SRR7297450  | GCA 015728905.1 | N/A            |
| PDT000904669.1 | SAMN09401085  | SAMN09401085  | SRR7297156  | GCA 015728945.1 | N/A            |
| PDT000904670.1 | SAMN09401082  | SAMN09401082  | SRR7297151  | GCA 015728955.1 | N/A            |
| PDT000904671.1 | SAMN09401086  | SAMN09401086  | SRR7297155  | GCA 015728965.1 | N/A            |
| PDT000904672.1 | SAMN09401084  | SAMN09401084  | SRR7297153  | GCA 015729005.1 | N/A            |
| PDT000904678.1 | SAMN09401076  | SAMN09401076  | SRR7297167  | GCA 015729125.1 | N/A            |
| PDT000904679.1 | SAMN09401078  | SAMN09401078  | SRR7297184  | GCA 015729135.1 | N/A            |
| PDT000904680.1 | SAMN09401075  | SAMN09401075  | SRR7296772  | GCA 015729165.1 | N/A            |
| PDT000904683.1 | SAMN09401074  | SAMN09401074  | SRR7297467  | GCA 015729205.1 | N/A            |
| PDT000904685.1 | SAMN09401072  | SAMN09401072  | SRR7297461  | GCA 015729265.1 | N/A            |
| PDT000904686.1 | SAMN09401068  | SAMN09401068  | SRR7296809  | GCA 015729285.1 | N/A            |
| PDT000904689.1 | SAMN09401069  | SAMN09401069  | SRR7297462  | GCA 015729325.1 | N/A            |
| PDT000904692.1 | SAMN16093280  | SAMN16093280  | SRR13123359 | GCA 015732455.1 | N/A            |
| PDT000813805.1 | SAMN12776028  | SAMN12776028  | SRR10179211 | GCA 009460485.1 | PDS000072578.1 |
| PDT000108842.1 | SAMN03359571  | SAMN03359571  | SRR1814758  | GCA 015613595.1 | PDS000067789.1 |
| PDT000108731.1 | SAMN03359460  | SAMN03359460  | SRR1814647  | GCA 015615065.1 | PDS000069330.1 |
| PDT000791049.2 | SAMEA70069168 | SAMEA70069168 | ERR2506347  | GCA 903807915.1 | PDS000069330.1 |
| PDT000313759.2 | SAMN08999370  | SAMN08999370  | SRR7445585  | GCA 003111725.1 | PDS000068838.1 |
| PDT000116052.2 | SAMEA1464443  | SAMEA1464443  | ERR118344   | GCA 900038535.1 | PDS000069302.1 |
| PDT000116588.2 | SAMEA1317551  | SAMEA1317551  | ERR107785   | GCA 900043935.1 | PDS000069302.1 |
| PDT000117352.2 | SAMEA1317318  | SAMEA1317318  | ERR107881   | GCA 900040845.1 | PDS000069302.1 |
| PDT000119203.2 | SAMEA1469714  | SAMEA1469714  | ERR158668   | GCA 900040425.1 | PDS000069302.1 |
| PDT000119572.2 | SAMEA1317433  | SAMEA1317433  | ERR107883   | GCA 900048155.1 | PDS000069302.1 |
| PDT000112129.2 | SAMEA1464338  | SAMEA1464338  | ERR118446   | GCA 900042215.1 | PDS000068796.1 |
| PDT000116086.2 | SAMEA1464270  | SAMEA1464270  | ERR118447   | GCA 900020435.1 | PDS000068796.1 |
| PDT000116676.2 | SAMEA1317466  | SAMEA1317466  | ERR107894   | GCA 900046855.1 | PDS000068796.1 |
| PDT000117816.2 | SAMEA1469574  | SAMEA1469574  | ERR158674   | GCA 900049795.1 | PDS000068796.1 |
| PDT000343161.2 | SAMEA1531664  | SAMEA1531664  | ERR177197   | GCA 900484145.1 | PDS000068796.1 |
| PDT000132851.2 | SAMEA2384857  | SAMEA2384857  | ERR554779   | GCA 900082815.1 | PDS000068358.1 |
| PDT000116940.2 | SAMEA1317389  | SAMEA1317389  | ERR107837   | GCA 900046055.1 | PDS000069360.1 |
| PDT000790299.2 | SAMEA4008753  | SAMEA4008753  | ERR1715454  | GCA 903803325.1 | PDS000069360.1 |

|                |                |                |             |                 |                |
|----------------|----------------|----------------|-------------|-----------------|----------------|
| PDT000790341.2 | SAMEA4008797   | SAMEA4008797   | ERR1715497  | GCA 903803745.1 | PDS000069360.1 |
| PDT000790345.2 | SAMEA4008801   | SAMEA4008801   | ERR1715501  | GCA 903803785.1 | PDS000069360.1 |
| PDT000790350.2 | SAMEA4008807   | SAMEA4008807   | ERR1715506  | GCA 903803825.1 | PDS000069360.1 |
| PDT000790354.2 | SAMEA4008812   | SAMEA4008812   | ERR1715511  | GCA 903803885.1 | PDS000069360.1 |
| PDT000790357.2 | SAMEA4552930   | SAMEA4552930   | ERR3012660  | GCA 903803915.1 | PDS000069360.1 |
| PDT000790381.2 | SAMEA4552958   | SAMEA4552958   | ERR3012684  | GCA 903804155.1 | PDS000069360.1 |
| PDT000790389.2 | SAMEA4552964   | SAMEA4552964   | ERR3012690  | GCA 903804195.1 | PDS000069360.1 |
| PDT000790859.2 | SAMEA4553175   | SAMEA4553175   | ERR1891903  | GCA 903806235.1 | PDS000069360.1 |
| PDT000790911.2 | SAMEA4553200   | SAMEA4553200   | ERR1891928  | GCA 903806495.1 | PDS000069360.1 |
| PDT000083703.2 | SAMEA2384637   | SAMEA2384637   | ERR554559   | GCA 001287885.1 | PDS000069450.1 |
| PDT000083704.2 | SAMEA2384693   | SAMEA2384693   | ERR554615   | GCA 001287905.1 | PDS000069450.1 |
| PDT000083724.2 | SAMEA2384801   | SAMEA2384801   | ERR554723   | GCA 001288325.1 | PDS000069450.1 |
| PDT000083742.2 | SAMEA2384864   | SAMEA2384864   | ERR554786   | GCA 001288685.1 | PDS000069450.1 |
| PDT000083793.2 | SAMEA2384677   | SAMEA2384677   | ERR554599   | GCA 001289705.1 | PDS000069450.1 |
| PDT000083846.2 | SAMEA2384636   | SAMEA2384636   | ERR554558   | GCA 001290765.1 | PDS000069450.1 |
| PDT000083854.2 | SAMEA2384604   | SAMEA2384604   | ERR554526   | GCA 001290925.1 | PDS000069450.1 |
| PDT000083869.2 | SAMEA2384629   | SAMEA2384629   | ERR554551   | GCA 001291225.1 | PDS000069450.1 |
| PDT000772625.2 | SAMEA103891501 | SAMEA103891501 | ERR2533731  | GCA 903802605.1 | PDS000069450.1 |
| PDT000790261.2 | SAMEA4008714   | SAMEA4008714   | ERR1715416  | GCA 903801735.1 | PDS000069450.1 |
| PDT000805137.2 | SAMEA6125665   | SAMEA6125665   | ERR3623539  | GCA 903989205.1 | PDS000069180.1 |
| PDT000805139.2 | SAMEA6125671   | SAMEA6125671   | ERR3623543  | GCA 903989255.1 | PDS000069180.1 |
| PDT000805142.2 | SAMEA6125681   | SAMEA6125681   | ERR3623548  | GCA 903989265.1 | PDS000069180.1 |
| PDT000805143.2 | SAMEA6125679   | SAMEA6125679   | ERR3623544  | GCA 903989245.1 | PDS000069180.1 |
| PDT000805144.2 | SAMEA6125675   | SAMEA6125675   | ERR3623545  | GCA 903989285.1 | PDS000069180.1 |
| PDT000805145.2 | SAMEA6125686   | SAMEA6125686   | ERR3623546  | GCA 903989315.1 | PDS000069180.1 |
| PDT000805146.2 | SAMEA6125692   | SAMEA6125692   | ERR3623547  | GCA 903989325.1 | PDS000069180.1 |
| PDT000805147.2 | SAMEA6125674   | SAMEA6125674   | ERR3623542  | GCA 903989295.1 | PDS000069180.1 |
| PDT000805151.2 | SAMEA6125676   | SAMEA6125676   | ERR3623549  | GCA 903989345.1 | PDS000069180.1 |
| PDT000805157.2 | SAMEA6125677   | SAMEA6125677   | ERR3623541  | GCA 903989415.1 | PDS000069180.1 |
| PDT000805159.2 | SAMEA6125672   | SAMEA6125672   | ERR3623540  | GCA 903989435.1 | PDS000069180.1 |
| PDT000589527.1 | SAMN04505172   | SAMN04505172   | SRR3194911  | GCA 015602165.1 | PDS000069994.1 |
| PDT000589534.1 | SAMN04505179   | SAMN04505179   | SRR3194918  | GCA 015601605.1 | PDS000069994.1 |
| PDT000589539.1 | SAMN04505184   | SAMN04505184   | SRR3194923  | GCA 015601525.1 | PDS000069994.1 |
| PDT000589549.1 | SAMN04505194   | SAMN04505194   | SRR3194933  | GCA 015601295.1 | PDS000069994.1 |
| PDT000589550.1 | SAMN04505195   | SAMN04505195   | SRR3194934  | GCA 015601355.1 | PDS000069994.1 |
| PDT000589556.1 | SAMN04505201   | SAMN04505201   | SRR3194940  | GCA 015601165.1 | PDS000069994.1 |
| PDT000589566.1 | SAMN04505211   | SAMN04505211   | SRR3194950  | GCA 015600995.1 | PDS000069994.1 |
| PDT000589567.1 | SAMN04505212   | SAMN04505212   | SRR3194951  | GCA 015602025.1 | PDS000069994.1 |
| PDT000108620.1 | SAMN03359348   | SAMN03359348   | SRR1814535  | GCA 015617385.1 | PDS000069700.1 |
| PDT000108658.1 | SAMN03359386   | SAMN03359386   | SRR1814573  | GCA 015618405.1 | PDS000069700.1 |
| PDT000132736.2 | SAMEA2383511   | SAMEA2383511   | ERR539907   | GCA 900080825.1 | PDS000069649.2 |
| PDT000721525.2 | SAMN14423256   | SAMN14423256   | SRR11375231 | GCA 011947475.1 | PDS000069649.2 |
| PDT000721526.2 | SAMN14423255   | SAMN14423255   | SRR11375232 | GCA 011947505.1 | PDS000069649.2 |
| PDT000904304.1 | SAMN09401030   | SAMN09401030   | SRR7296955  | GCA 015715425.1 | PDS000076876.1 |
| PDT000904360.1 | SAMN09400968   | SAMN09400968   | SRR7296989  | GCA 015716545.1 | PDS000076876.1 |
| PDT000904467.1 | SAMN13622082   | SAMN13622082   | SRR10728163 | GCA 015724815.1 | PDS000076876.1 |
| PDT000904502.1 | SAMN12220516   | SAMN12220516   | SRR9647727  | GCA 015725505.1 | PDS000076876.1 |
| PDT000904592.1 | SAMN11285056   | SAMN11285056   | SRR8810232  | GCA 015727405.1 | PDS000076876.1 |
| PDT000904651.1 | SAMN09401104   | SAMN09401104   | SRR7297365  | GCA 015728575.1 | PDS000076876.1 |
| PDT000904673.1 | SAMN09401083   | SAMN09401083   | SRR7297154  | GCA 015729025.1 | PDS000076876.1 |
| PDT000108630.1 | SAMN03359358   | SAMN03359358   | SRR1814545  | GCA 015618445.1 | PDS000067782.1 |
| PDT000108660.1 | SAMN03359388   | SAMN03359388   | SRR1814575  | GCA 015618325.1 | PDS000067782.1 |
| PDT000108667.1 | SAMN03359395   | SAMN03359395   | SRR1814582  | GCA 015618245.1 | PDS000067782.1 |
| PDT000108713.1 | SAMN03359442   | SAMN03359442   | SRR1814629  | GCA 015616695.1 | PDS000067782.1 |
| PDT000108716.1 | SAMN03359445   | SAMN03359445   | SRR1814632  | GCA 015616525.1 | PDS000067782.1 |
| PDT000079649.2 | SAMEA1324645   | SAMEA1324645   | ERR134649   | GCA 001209005.1 | PDS000067908.1 |
| PDT000090464.2 | SAMEA1324626   | SAMEA1324626   | ERR134650   | GCA 001352375.1 | PDS000067908.1 |
| PDT000090480.2 | SAMEA1324682   | SAMEA1324682   | ERR134661   | GCA 001352695.1 | PDS000067908.1 |
| PDT000090494.2 | SAMEA1324726   | SAMEA1324726   | ERR134660   | GCA 001352975.1 | PDS000067908.1 |
| PDT000090563.2 | SAMEA1710090   | SAMEA1710090   | ERR249314   | GCA 001354355.1 | PDS000067908.1 |
| PDT000090565.2 | SAMEA1710098   | SAMEA1710098   | ERR249313   | GCA 001354395.1 | PDS000067908.1 |
| PDT000538369.1 | SAMEA104452086 | SAMEA104452086 | ERR2232582  | GCA 015604105.1 | PDS000067979.1 |
| PDT000538386.1 | SAMEA104452103 | SAMEA104452103 | ERR2232601  | GCA 015603835.1 | PDS000067979.1 |
| PDT000538425.1 | SAMEA104452142 | SAMEA104452142 | ERR2232642  | GCA 015602775.1 | PDS000067979.1 |
| PDT000444231.1 | SAMEA53041918  | SAMEA53041918  | ERR2506155  | GCA 015606005.1 | PDS000067844.1 |
| PDT000444233.1 | SAMEA53043418  | SAMEA53043418  | ERR2506157  | GCA 015605705.1 | PDS000067844.1 |
| PDT000444257.1 | SAMEA53062168  | SAMEA53062168  | ERR2506181  | GCA 015605645.1 | PDS000067844.1 |
| PDT000444258.1 | SAMEA53062918  | SAMEA53062918  | ERR2506182  | GCA 015605625.1 | PDS000067844.1 |

|                |               |               |             |                 |                |
|----------------|---------------|---------------|-------------|-----------------|----------------|
| PDT000444259.1 | SAMEA53063668 | SAMEA53063668 | ERR2506183  | GCA 015605605.1 | PDS000067844.1 |
| PDT000444261.1 | SAMEA53065168 | SAMEA53065168 | ERR2506185  | GCA 015605665.1 | PDS000067844.1 |
| PDT000811608.1 | SAMEA4387193  | SAMEA4387193  | ERR1789178  | GCA 015577375.1 | PDS000067868.1 |
| PDT000175314.2 | SAMEA4017533  | SAMEA4017533  | ERR1429006  | GCA 900088515.1 | PDS000068861.1 |
| PDT000079072.2 | SAMEA1324661  | SAMEA1324661  | ERR134692   | GCA 001196815.1 | PDS000068894.1 |
| PDT000079372.2 | SAMEA1324547  | SAMEA1324547  | ERR134808   | GCA 001203135.1 | PDS000068894.1 |
| PDT000079543.2 | SAMEA1324651  | SAMEA1324651  | ERR134693   | GCA 001206735.1 | PDS000068894.1 |
| PDT000090449.2 | SAMEA1324575  | SAMEA1324575  | ERR134699   | GCA 001352075.1 | PDS000068894.1 |
| PDT000090495.2 | SAMEA1324728  | SAMEA1324728  | ERR134814   | GCA 001352995.1 | PDS000068894.1 |
| PDT000090513.2 | SAMEA1324768  | SAMEA1324768  | ERR134691   | GCA 001353355.1 | PDS000068894.1 |
| PDT000078883.2 | SAMEA1324531  | SAMEA1324531  | ERR134682   | GCA 001192915.1 | PDS000068916.1 |
| PDT000079459.2 | SAMEA1324540  | SAMEA1324540  | ERR134672   | GCA 001204995.1 | PDS000068916.1 |
| PDT000079486.2 | SAMEA1324527  | SAMEA1324527  | ERR134673   | GCA 001205535.1 | PDS000068916.1 |
| PDT000090447.2 | SAMEA1324570  | SAMEA1324570  | ERR134779   | GCA 001352035.1 | PDS000068916.1 |
| PDT000090487.2 | SAMEA1324702  | SAMEA1324702  | ERR134680   | GCA 001352835.1 | PDS000068916.1 |
| PDT000090564.2 | SAMEA1710092  | SAMEA1710092  | ERR249315   | GCA 001354375.1 | PDS000068916.1 |
| PDT000079512.2 | SAMEA1324688  | SAMEA1324688  | ERR134635   | GCA 001206095.1 | PDS000069250.2 |
| PDT000079555.2 | SAMEA1324705  | SAMEA1324705  | ERR134636   | GCA 001206995.1 | PDS000069250.2 |
| PDT000090459.2 | SAMEA1324605  | SAMEA1324605  | ERR134644   | GCA 001352275.1 | PDS000069250.2 |
| PDT000090479.2 | SAMEA1324679  | SAMEA1324679  | ERR134634   | GCA 001352675.1 | PDS000069250.2 |
| PDT000852670.1 | SAMN12642259  | SAMN12642259  | SRR11016301 | GCA 014831825.1 | PDS000069250.2 |
| PDT000078999.2 | SAMEA1324743  | SAMEA1324743  | ERR134621   | GCA 001195305.1 | PDS000069278.2 |
| PDT000079282.2 | SAMEA1324733  | SAMEA1324733  | ERR134624   | GCA 001201255.1 | PDS000069278.2 |
| PDT000079796.2 | SAMEA1324725  | SAMEA1324725  | ERR134623   | GCA 001212085.1 | PDS000069278.2 |
| PDT000090431.2 | SAMEA1324541  | SAMEA1324541  | ERR134625   | GCA 001351715.1 | PDS000069278.2 |
| PDT000852730.1 | SAMN12642184  | SAMN12642184  | SRR11016219 | GCA 014833035.1 | PDS000069278.2 |
| PDT000079134.2 | SAMEA1324693  | SAMEA1324693  | ERR134769   | GCA 001198135.1 | PDS000069271.2 |
| PDT000079646.2 | SAMEA1324586  | SAMEA1324586  | ERR134768   | GCA 001208945.1 | PDS000069271.2 |
| PDT000079678.2 | SAMEA1324691  | SAMEA1324691  | ERR134770   | GCA 001209605.1 | PDS000069271.2 |
| PDT000090497.2 | SAMEA1324730  | SAMEA1324730  | ERR134775   | GCA 001353035.1 | PDS000069271.2 |
| PDT000852682.1 | SAMN12642249  | SAMN12642249  | SRR11016260 | GCA 014832055.1 | PDS000069271.2 |
| PDT000078846.2 | SAMEA1710106  | SAMEA1710106  | ERR249325   | GCA 001192155.1 | PDS000069240.1 |
| PDT000079527.2 | SAMEA1710105  | SAMEA1710105  | ERR249326   | GCA 001206395.1 | PDS000069240.1 |
| PDT000079675.2 | SAMEA1324655  | SAMEA1324655  | ERR134746   | GCA 001209545.1 | PDS000069240.1 |
| PDT000079679.2 | SAMEA1324539  | SAMEA1324539  | ERR134730   | GCA 001209625.1 | PDS000069240.1 |
| PDT000079788.2 | SAMEA1324616  | SAMEA1324616  | ERR134731   | GCA 001211925.1 | PDS000069240.1 |
| PDT000791259.2 | SAMEA70240168 | SAMEA70240168 | ERR2525266  | GCA 903810015.1 | PDS000069314.1 |
| PDT000804968.2 | SAMEA6125856  | SAMEA6125856  | ERR3623789  | GCA 903987545.1 | PDS000069314.1 |
| PDT000804976.2 | SAMEA6125859  | SAMEA6125859  | ERR3623790  | GCA 903987615.1 | PDS000069314.1 |
| PDT000804990.2 | SAMEA6125875  | SAMEA6125875  | ERR3623807  | GCA 903987815.1 | PDS000069314.1 |
| PDT000804996.2 | SAMEA6125877  | SAMEA6125877  | ERR3623806  | GCA 903987775.1 | PDS000069314.1 |
| PDT000078833.2 | SAMEA1463466  | SAMEA1463466  | ERR302701   | GCA 001191855.1 | PDS000069364.1 |
| PDT000078971.2 | SAMEA1463485  | SAMEA1463485  | ERR144822   | GCA 001194725.1 | PDS000069364.1 |
| PDT000079575.2 | SAMEA1463468  | SAMEA1463468  | ERR302711   | GCA 001207435.1 | PDS000069364.1 |
| PDT000090369.2 | SAMEA1904138  | SAMEA1904138  | ERR294307   | GCA 001350015.1 | PDS000069364.1 |
| PDT000790799.2 | SAMEA4553158  | SAMEA4553158  | ERR1891887  | GCA 903806075.1 | PDS000069364.1 |
| PDT000790958.2 | SAMEA4553247  | SAMEA4553247  | ERR3012783  | GCA 903807005.1 | PDS000069350.1 |
| PDT000790959.2 | SAMEA4553248  | SAMEA4553248  | ERR3012784  | GCA 903807015.1 | PDS000069350.1 |
| PDT000790972.2 | SAMEA4553262  | SAMEA4553262  | ERR3012798  | GCA 903807135.1 | PDS000069350.1 |
| PDT000790986.2 | SAMEA4553276  | SAMEA4553276  | ERR3012812  | GCA 903807285.1 | PDS000069350.1 |
| PDT000791006.2 | SAMEA4553296  | SAMEA4553296  | ERR3012832  | GCA 903807485.1 | PDS000069350.1 |
| PDT000791014.2 | SAMEA4553304  | SAMEA4553304  | ERR3012840  | GCA 903807565.1 | PDS000069339.1 |
| PDT000791015.2 | SAMEA4553305  | SAMEA4553305  | ERR3012841  | GCA 903807575.1 | PDS000069339.1 |
| PDT000791016.2 | SAMEA4553306  | SAMEA4553306  | ERR3012842  | GCA 903807595.1 | PDS000069339.1 |
| PDT000791031.2 | SAMEA70055668 | SAMEA70055668 | ERR2506329  | GCA 903807735.1 | PDS000069339.1 |
| PDT000791039.2 | SAMEA70061668 | SAMEA70061668 | ERR2506337  | GCA 903807815.1 | PDS000069339.1 |
| PDT000790679.2 | SAMEA4553118  | SAMEA4553118  | ERR1891849  | GCA 903805735.1 | PDS000069367.1 |
| PDT000790687.2 | SAMEA4553121  | SAMEA4553121  | ERR1891852  | GCA 903805765.1 | PDS000069367.1 |
| PDT000790694.2 | SAMEA4553124  | SAMEA4553124  | ERR1891855  | GCA 903805795.1 | PDS000069367.1 |
| PDT000790767.2 | SAMEA4553147  | SAMEA4553147  | ERR1891876  | GCA 903805985.1 | PDS000069367.1 |
| PDT000790780.2 | SAMEA4553153  | SAMEA4553153  | ERR1891882  | GCA 903806025.1 | PDS000069367.1 |
| PDT000267110.2 | SAMN06925304  | SAMN06925304  | SRR5520613  | GCA 002780385.1 | PDS000069007.1 |
| PDT000267111.2 | SAMN06925302  | SAMN06925302  | SRR5520611  | GCA 002780395.1 | PDS000069007.1 |
| PDT000267112.2 | SAMN06925301  | SAMN06925301  | SRR5520610  | GCA 002780425.1 | PDS000069007.1 |
| PDT000267113.2 | SAMN06925303  | SAMN06925303  | SRR5520612  | GCA 002780445.1 | PDS000069007.1 |
| PDT000084517.2 | SAMN03658604  | SAMN03658604  | SRR2107108  | GCA 001297375.1 | PDS000069016.1 |
| PDT000084523.2 | SAMN03658603  | SAMN03658603  | SRR2107107  | GCA 001297465.1 | PDS000069016.1 |
| PDT000084530.2 | SAMN03658605  | SAMN03658605  | SRR2107109  | GCA 001297625.1 | PDS000069016.1 |

|                 |                |                |             |                 |                |
|-----------------|----------------|----------------|-------------|-----------------|----------------|
| PDT000084533.2  | SAMN03658606   | SAMN03658606   | SRR2107110  | GCA 001297685.1 | PDS000069016.1 |
| PDT000084513.2  | SAMN03658588   | SAMN03658588   | SRR2107100  | GCA 001297295.1 | PDS000069027.1 |
| PDT000084515.2  | SAMN03658590   | SAMN03658590   | SRR2107112  | GCA 001297305.1 | PDS000069027.1 |
| PDT000084516.2  | SAMN03658591   | SAMN03658591   | SRR2107114  | GCA 001297315.1 | PDS000069027.1 |
| PDT000084518.2  | SAMN03658589   | SAMN03658589   | SRR2107101  | GCA 001297415.1 | PDS000069027.1 |
| PDT000766278.2  | SAMN14906909   | SAMN14906909   | SRR11787394 | GCA 013338145.1 | PDS000069536.1 |
| PDT000766310.2  | SAMN14906876   | SAMN14906876   | SRR11787382 | GCA 013338785.1 | PDS000069536.1 |
| PDT000813796.1  | SAMN12776038   | SAMN12776038   | SRR10179200 | GCA 009460295.1 | PDS000069536.1 |
| PDT000813912.1  | SAMN12775921   | SAMN12775921   | SRR10178985 | GCA 009462595.1 | PDS000069536.1 |
| PDT000069550.2  | SAMEA1324644   | SAMEA1324644   | ERR134784   | GCA 001047835.1 | PDS000069643.1 |
| PDT000078835.2  | SAMEA1324737   | SAMEA1324737   | ERR134804   | GCA 001191895.1 | PDS000069643.1 |
| PDT000079544.2  | SAMEA1324660   | SAMEA1324660   | ERR134799   | GCA 001206755.1 | PDS000069643.1 |
| PDT000079574.2  | SAMEA1324625   | SAMEA1324625   | ERR134785   | GCA 001207415.1 | PDS000069643.1 |
| PDT000088247.1  | SAMEA2493787   | SAMEA2493787   | ERR493463   | GCA 015619405.1 | PDS000069504.1 |
| PDT000088252.1  | SAMEA2493796   | SAMEA2493796   | ERR493472   | GCA 015619025.1 | PDS000069504.1 |
| PDT000070474.2  | SAMN03197177   | SAMN03197177   | SRR1655409  | GCA 001060575.1 | PDS000069614.1 |
| PDT000070476.2  | SAMN03197193   | SAMN03197193   | SRR1655425  | GCA 001060615.1 | PDS000069614.1 |
| PDT000070506.2  | SAMN03197178   | SAMN03197178   | SRR1655410  | GCA 001061235.1 | PDS000069614.1 |
| PDT000070554.2  | SAMN03197191   | SAMN03197191   | SRR1655423  | GCA 001062355.1 | PDS000069614.1 |
| PDT000070509.2  | SAMN03197224   | SAMN03197224   | SRR1655456  | GCA 001061355.1 | PDS000069605.1 |
| PDT000070557.2  | SAMN03197225   | SAMN03197225   | SRR1655457  | GCA 001062475.1 | PDS000069605.1 |
| PDT000070558.2  | SAMN03197226   | SAMN03197226   | SRR1655458  | GCA 001062485.1 | PDS000069605.1 |
| PDT000070561.2  | SAMN03197232   | SAMN03197232   | SRR1655464  | GCA 001062555.1 | PDS000069605.1 |
| PDT000132679.2  | SAMEA2445606   | SAMEA2445606   | ERR573309   | GCA 900083275.1 | PDS000069634.1 |
| PDT000132694.2  | SAMEA2384344   | SAMEA2384344   | ERR554268   | GCA 900081555.1 | PDS000069634.1 |
| PDT000132789.2  | SAMEA2383519   | SAMEA2383519   | ERR539915   | GCA 900080835.1 | PDS000069634.1 |
| PDT000132857.2  | SAMEA2384376   | SAMEA2384376   | ERR554299   | GCA 900081645.1 | PDS000069634.1 |
| PDT000184851.1  | SAMEA24761668  | SAMEA24761668  | ERR1753509  | GCA 015610445.1 | PDS000068046.1 |
| PDT000184852.1  | SAMEA24762418  | SAMEA24762418  | ERR1753510  | GCA 015610505.1 | PDS000068046.1 |
| PDT000184853.1  | SAMEA24763168  | SAMEA24763168  | ERR1753511  | GCA 015610325.1 | PDS000068046.1 |
| PDT000112131.2  | SAMEA1469680   | SAMEA1469680   | ERR158652   | GCA 900018125.1 | PDS000068016.1 |
| PDT000116954.2  | SAMEA1464429   | SAMEA1464429   | ERR118507   | GCA 900022655.1 | PDS000068016.1 |
| PDT000117241.2  | SAMEA1464634   | SAMEA1464634   | ERR118346   | GCA 900049465.1 | PDS000068016.1 |
| PDT000538468.1  | SAMEA104452185 | SAMEA104452185 | ERR2232692  | GCA 015603345.1 | PDS000067985.1 |
| PDT000184843.1  | SAMEA24755668  | SAMEA24755668  | ERR1753501  | GCA 015610145.1 | PDS000068050.1 |
| PDT000184844.1  | SAMEA24756418  | SAMEA24756418  | ERR1753502  | GCA 015610195.1 | PDS000068050.1 |
| PDT000184845.1  | SAMEA24757168  | SAMEA24757168  | ERR1753503  | GCA 015610545.1 | PDS000068050.1 |
| PDT000115859.2  | SAMEA1464177   | SAMEA1464177   | ERR134367   | GCA 900040695.1 | PDS000068260.1 |
| PDT000118655.2  | SAMEA1464615   | SAMEA1464615   | ERR118493   | GCA 900041835.1 | PDS000068260.1 |
| PDT000119373.2  | SAMEA1464706   | SAMEA1464706   | ERR118489   | GCA 900040455.1 | PDS000068260.1 |
| PDT000079297.2  | SAMEA1466505   | SAMEA1466505   | ERR302819   | GCA 001201555.1 | PDS000068660.1 |
| PDT000090525.2  | SAMEA1466468   | SAMEA1466468   | ERR302818   | GCA 001353595.1 | PDS000068660.1 |
| PDT000090539.2  | SAMEA1466500   | SAMEA1466500   | ERR302823   | GCA 001353875.1 | PDS000068660.1 |
| PDT000371250.2  | SAMD00083490   | SAMD00083490   | DRR107130   | GCA 003419145.1 | PDS000068655.1 |
| PDT000371356.2  | SAMD00083591   | SAMD00083591   | DRR107231   | GCA 003421485.1 | PDS000068655.1 |
| PDT000371402.2  | SAMD00083637   | SAMD00083637   | DRR107277   | GCA 003422405.1 | PDS000068655.1 |
| PDT000371276.2  | SAMD00083516   | SAMD00083516   | DRR107156   | GCA 003419805.1 | PDS000068686.1 |
| PDT000371279.2  | SAMD00083519   | SAMD00083519   | DRR107159   | GCA 003419865.1 | PDS000068686.1 |
| PDT000371408.2  | SAMD00083643   | SAMD00083643   | DRR107283   | GCA 003422525.1 | PDS000068686.1 |
| PDT000371257.2  | SAMD00083497   | SAMD00083497   | DRR107137   | GCA 003419425.1 | PDS000068661.1 |
| PDT000371258.2  | SAMD00083498   | SAMD00083498   | DRR107138   | GCA 003419445.1 | PDS000068661.1 |
| PDT000371372.2  | SAMD00083607   | SAMD00083607   | DRR107247   | GCA 003421805.1 | PDS000068661.1 |
| PDT000371278.2  | SAMD00083518   | SAMD00083518   | DRR107158   | GCA 003419845.1 | PDS000068687.1 |
| PDT000371282.2  | SAMD00083520   | SAMD00083520   | DRR107160   | GCA 003419925.1 | PDS000068687.1 |
| PDT000371409.2  | SAMD00083644   | SAMD00083644   | DRR107284   | GCA 003422545.1 | PDS000068687.1 |
| PDT000371235.2  | SAMD00083476   | SAMD00083476   | DRR107116   | GCA 003418515.1 | PDS000068668.1 |
| PDT000371319.2  | SAMD00083554   | SAMD00083554   | DRR107194   | GCA 003420705.1 | PDS000068668.1 |
| PDT000371431.2  | SAMD00083666   | SAMD00083666   | DRR107306   | GCA 003422985.1 | PDS000068668.1 |
| PDT000080390.2  | SAMEA862584    | SAMEA862584    | ERR025802   | GCA 001235385.1 | PDS000069195.1 |
| PDT000080498.2  | SAMEA862587    | SAMEA862587    | ERR025803   | GCA 001239085.1 | PDS000069195.1 |
| PDT000080509.2  | SAMEA862528    | SAMEA862528    | ERR024972   | GCA 001239465.1 | PDS000069195.1 |
| PDT000079810.2  | SAMEA1466526   | SAMEA1466526   | ERR302829   | GCA 001212365.1 | PDS000069225.1 |
| PDT000090438.2  | SAMEA1324556   | SAMEA1324556   | ERR134615   | GCA 001351855.1 | PDS000069225.1 |
| PDT000090551.2  | SAMEA1466522   | SAMEA1466522   | ERR302830   | GCA 001354115.1 | PDS000069225.1 |
| PDT0000804978.2 | SAMEA6125852   | SAMEA6125852   | ERR3623787  | GCA 903987605.1 | PDS000069188.1 |
| PDT0000804980.2 | SAMEA6125853   | SAMEA6125853   | ERR3623786  | GCA 903987655.1 | PDS000069188.1 |
| PDT0000804989.2 | SAMEA6125863   | SAMEA6125863   | ERR3623795  | GCA 903987745.1 | PDS000069188.1 |
| PDT000080094.2  | SAMEA734745    | SAMEA734745    | ERR017230   | GCA 001224685.1 | PDS000069205.1 |

|                |               |               |            |                 |                |
|----------------|---------------|---------------|------------|-----------------|----------------|
| PDT000080127.2 | SAMEA734778   | SAMEA734778   | ERR017227  | GCA 001225965.1 | PDS000069205.1 |
| PDT000080235.2 | SAMEA734743   | SAMEA734743   | ERR017219  | GCA 001229525.1 | PDS000069205.1 |
| PDT000080126.2 | SAMEA734690   | SAMEA734690   | ERR017258  | GCA 001225945.1 | PDS000069211.1 |
| PDT000080263.2 | SAMEA734686   | SAMEA734686   | ERR017262  | GCA 001230425.1 | PDS000069211.1 |
| PDT000080443.2 | SAMEA734682   | SAMEA734682   | ERR017295  | GCA 001237245.1 | PDS000069211.1 |
| PDT000080130.2 | SAMEA734702   | SAMEA734702   | ERR017275  | GCA 001226125.1 | PDS000069207.1 |
| PDT000080205.2 | SAMEA734683   | SAMEA734683   | ERR017265  | GCA 001228385.1 | PDS000069207.1 |
| PDT000080286.2 | SAMEA734695   | SAMEA734695   | ERR017277  | GCA 001231305.1 | PDS000069207.1 |
| PDT000080080.2 | SAMEA734724   | SAMEA734724   | ERR017199  | GCA 001224165.1 | PDS000069203.1 |
| PDT000080167.2 | SAMEA734729   | SAMEA734729   | ERR017194  | GCA 001227185.1 | PDS000069203.1 |
| PDT000080284.2 | SAMEA734736   | SAMEA734736   | ERR017202  | GCA 001231225.1 | PDS000069203.1 |
| PDT000080133.2 | SAMEA734750   | SAMEA734750   | ERR017186  | GCA 001226205.1 | PDS000069206.1 |
| PDT000080216.2 | SAMEA734754   | SAMEA734754   | ERR017189  | GCA 001228885.1 | PDS000069206.1 |
| PDT000080408.2 | SAMEA734755   | SAMEA734755   | ERR017188  | GCA 001235875.1 | PDS000069206.1 |
| PDT000070471.2 | SAMN03197153  | SAMN03197153  | SRR1655385 | GCA 001060505.1 | PDS000069616.1 |
| PDT000070472.2 | SAMN03197154  | SAMN03197154  | SRR1655386 | GCA 001060535.1 | PDS000069616.1 |
| PDT000070530.2 | SAMN03197155  | SAMN03197155  | SRR1655387 | GCA 001062275.1 | PDS000069616.1 |
| PDT000070798.2 | SAMN03198170  | SAMN03198170  | SRR1656402 | GCA 001067705.1 | PDS000069586.1 |
| PDT000070822.2 | SAMN03198176  | SAMN03198176  | SRR1656408 | GCA 001068265.1 | PDS000069586.1 |
| PDT000070083.2 | SAMN03198175  | SAMN03198175  | SRR1656407 | GCA 001068255.1 | PDS000069586.1 |
| PDT000070460.2 | SAMN03197057  | SAMN03197057  | SRR1655289 | GCA 001060265.1 | PDS000069609.1 |
| PDT000070496.2 | SAMN03197075  | SAMN03197075  | SRR1655307 | GCA 001061035.1 | PDS000069609.1 |
| PDT000070537.2 | SAMN03197076  | SAMN03197076  | SRR1655308 | GCA 001061965.1 | PDS000069609.1 |
| PDT000070497.2 | SAMN03197094  | SAMN03197094  | SRR1655326 | GCA 001061075.1 | PDS000069611.1 |
| PDT000070499.2 | SAMN03197077  | SAMN03197077  | SRR1655309 | GCA 001061065.1 | PDS000069611.1 |
| PDT000070541.2 | SAMN03197093  | SAMN03197093  | SRR1655325 | GCA 001062035.1 | PDS000069611.1 |
| PDT000589518.1 | SAMN04505163  | SAMN04505163  | SRR3194902 | GCA 015601855.1 | PDS000069993.1 |
| PDT000589538.1 | SAMN04505183  | SAMN04505183  | SRR3194922 | GCA 015601485.1 | PDS000069993.1 |
| PDT000589540.1 | SAMN04505185  | SAMN04505185  | SRR3194924 | GCA 015601425.1 | PDS000069993.1 |
| PDT000589492.1 | SAMN04505137  | SAMN04505137  | SRR3194876 | GCA 015602405.1 | PDS000070004.1 |
| PDT000589498.1 | SAMN04505143  | SAMN04505143  | SRR3194882 | GCA 015602255.1 | PDS000070004.1 |
| PDT000589499.1 | SAMN04505144  | SAMN04505144  | SRR3194883 | GCA 015602285.1 | PDS000070004.1 |
| PDT000108829.1 | SAMN03359558  | SAMN03359558  | SRR1814745 | GCA 015613805.1 | PDS000070012.1 |
| PDT000589530.1 | SAMN04505175  | SAMN04505175  | SRR3194914 | GCA 015601685.1 | PDS000069995.1 |
| PDT000589531.1 | SAMN04505176  | SAMN04505176  | SRR3194915 | GCA 015601705.1 | PDS000069995.1 |
| PDT000589532.1 | SAMN04505177  | SAMN04505177  | SRR3194916 | GCA 015601625.1 | PDS000069995.1 |
| PDT000423429.1 | SAMEA4469717  | SAMEA4469717  | ERR1800528 | GCA 015607805.1 | PDS000067877.1 |
| PDT000423430.1 | SAMEA4469718  | SAMEA4469718  | ERR1800529 | GCA 015607445.1 | PDS000067877.1 |
| PDT000423396.1 | SAMEA4469689  | SAMEA4469689  | ERR1795914 | GCA 015608805.1 | PDS000067882.1 |
| PDT000423397.1 | SAMEA4469690  | SAMEA4469690  | ERR1795915 | GCA 015608645.1 | PDS000067882.1 |
| PDT000423438.1 | SAMEA4469726  | SAMEA4469726  | ERR1800537 | GCA 015607945.1 | PDS000067876.1 |
| PDT000423439.1 | SAMEA4469727  | SAMEA4469727  | ERR1800538 | GCA 015607925.1 | PDS000067876.1 |
| PDT000423404.1 | SAMEA4469697  | SAMEA4469697  | ERR1795922 | GCA 015608465.1 | PDS000067880.1 |
| PDT000423405.1 | SAMEA4469698  | SAMEA4469698  | ERR1795923 | GCA 015608445.1 | PDS000067880.1 |
| PDT000423459.1 | SAMEA4469750  | SAMEA4469750  | ERR1800558 | GCA 015607345.1 | PDS000067873.1 |
| PDT000423460.1 | SAMEA4469751  | SAMEA4469751  | ERR1800559 | GCA 015607405.1 | PDS000067873.1 |
| PDT000423415.1 | SAMEA4469741  | SAMEA4469741  | ERR1795933 | GCA 015608175.1 | PDS000067875.1 |
| PDT000423451.1 | SAMEA4469740  | SAMEA4469740  | ERR1800550 | GCA 015607645.1 | PDS000067875.1 |
| PDT000117923.2 | SAMEA1464416  | SAMEA1464416  | ERR118350  | GCA 900018015.1 | PDS000067883.1 |
| PDT000343119.2 | SAMEA1469888  | SAMEA1469888  | ERR159014  | GCA 900483095.1 | PDS000067883.1 |
| PDT000117938.2 | SAMEA1317510  | SAMEA1317510  | ERR107797  | GCA 900047445.1 | PDS000067872.1 |
| PDT000118175.2 | SAMEA1317399  | SAMEA1317399  | ERR107796  | GCA 900035655.1 | PDS000067872.1 |
| PDT000184793.1 | SAMEA24718168 | SAMEA24718168 | ERR1753451 | GCA 015611255.1 | PDS000068069.1 |
| PDT000184794.1 | SAMEA24718918 | SAMEA24718918 | ERR1753452 | GCA 015611285.1 | PDS000068069.1 |
| PDT000184778.1 | SAMEA24706918 | SAMEA24706918 | ERR1753436 | GCA 015612685.1 | PDS000068076.1 |
| PDT000184779.1 | SAMEA24707668 | SAMEA24707668 | ERR1753437 | GCA 015611645.1 | PDS000068076.1 |
| PDT000184819.1 | SAMEA24737668 | SAMEA24737668 | ERR1753477 | GCA 015611005.1 | PDS000068059.1 |
| PDT000184820.1 | SAMEA24738418 | SAMEA24738418 | ERR1753478 | GCA 015610965.1 | PDS000068059.1 |
| PDT000184801.1 | SAMEA24724168 | SAMEA24724168 | ERR1753459 | GCA 015610845.1 | PDS000068066.1 |
| PDT000184802.1 | SAMEA24724918 | SAMEA24724918 | ERR1753460 | GCA 015610725.1 | PDS000068066.1 |
| PDT000184815.1 | SAMEA24734668 | SAMEA24734668 | ERR1753473 | GCA 015611025.1 | PDS000068062.1 |
| PDT000184816.1 | SAMEA24735418 | SAMEA24735418 | ERR1753474 | GCA 015611045.1 | PDS000068062.1 |
| PDT000184780.1 | SAMEA24708418 | SAMEA24708418 | ERR1753438 | GCA 015611725.1 | PDS000068075.1 |
| PDT000184781.1 | SAMEA24709168 | SAMEA24709168 | ERR1753439 | GCA 015611665.1 | PDS000068075.1 |
| PDT000184798.1 | SAMEA24721918 | SAMEA24721918 | ERR1753456 | GCA 015610745.1 | PDS000068067.1 |
| PDT000184799.1 | SAMEA24722668 | SAMEA24722668 | ERR1753457 | GCA 015610345.1 | PDS000068067.1 |
| PDT000184785.1 | SAMEA24712168 | SAMEA24712168 | ERR1753443 | GCA 015612945.1 | PDS000068072.1 |
| PDT000184786.1 | SAMEA24712918 | SAMEA24712918 | ERR1753444 | GCA 015611425.1 | PDS000068072.1 |



|                |              |              |             |                 |                |
|----------------|--------------|--------------|-------------|-----------------|----------------|
| PDT000498535.2 | SAMN11458126 | SAMN11458126 | SRR8925599  | GCA 005047435.1 | PDS000068214.1 |
| PDT000498575.2 | SAMN11458131 | SAMN11458131 | SRR8925561  | GCA 005048415.1 | PDS000068214.1 |
| PDT000112041.2 | SAMEA1317419 | SAMEA1317419 | ERR107815   | GCA 900038445.1 | PDS000068238.1 |
| PDT000116068.2 | SAMEA1464680 | SAMEA1464680 | ERR118601   | GCA 900041775.1 | PDS000068238.1 |
| PDT000498538.2 | SAMN11458134 | SAMN11458134 | SRR8925285  | GCA 005047515.1 | PDS000068215.1 |
| PDT000498574.2 | SAMN11458135 | SAMN11458135 | SRR8925284  | GCA 005048435.1 | PDS000068215.1 |
| PDT000112277.2 | SAMEA1464511 | SAMEA1464511 | ERR118513   | GCA 900022665.1 | PDS000068393.1 |
| PDT000343178.2 | SAMEA1531685 | SAMEA1531685 | ERR177193   | GCA 900483745.1 | PDS000068393.1 |
| PDT000766313.2 | SAMN14906873 | SAMN14906873 | SRR11787402 | GCA 013338845.1 | PDS000068521.1 |
| PDT000813924.1 | SAMN12775909 | SAMN12775909 | SRR10178998 | GCA 009462875.1 | PDS000068521.1 |
| PDT000813855.1 | SAMN12775979 | SAMN12775979 | SRR10179265 | GCA 009461475.1 | PDS000068658.1 |
| PDT000813964.1 | SAMN12775865 | SAMN12775865 | SRR10179262 | GCA 009463695.1 | PDS000068658.1 |
| PDT000371241.2 | SAMD00083482 | SAMD00083482 | DRR107122   | GCA 003418765.1 | PDS000068664.1 |
| PDT000371351.2 | SAMD00083586 | SAMD00083586 | DRR107226   | GCA 003421385.1 | PDS000068664.1 |
| PDT000371206.2 | SAMD00083456 | SAMD00083456 | DRR107096   | GCA 003417455.1 | PDS000068662.1 |
| PDT000371364.2 | SAMD00083599 | SAMD00083599 | DRR107239   | GCA 003421645.1 | PDS000068662.1 |
| PDT000371231.2 | SAMD00083472 | SAMD00083472 | DRR107112   | GCA 003418385.1 | PDS000068665.1 |
| PDT000371344.2 | SAMD00083578 | SAMD00083578 | DRR107218   | GCA 003421225.1 | PDS000068665.1 |
| PDT000371313.2 | SAMD00083550 | SAMD00083550 | DRR107190   | GCA 003420565.1 | PDS000068656.1 |
| PDT000371396.2 | SAMD00083631 | SAMD00083631 | DRR107271   | GCA 003422285.1 | PDS000068656.1 |
| PDT000371342.2 | SAMD00083576 | SAMD00083576 | DRR107216   | GCA 003421185.1 | PDS000068666.1 |
| PDT000371442.2 | SAMD00083677 | SAMD00083677 | DRR107317   | GCA 003423585.1 | PDS000068666.1 |
| PDT000371249.2 | SAMD00083489 | SAMD00083489 | DRR107129   | GCA 003419085.1 | PDS000068663.1 |
| PDT000371355.2 | SAMD00083590 | SAMD00083590 | DRR107230   | GCA 003421465.1 | PDS000068663.1 |
| PDT000371264.2 | SAMD00083504 | SAMD00083504 | DRR107144   | GCA 003419565.1 | PDS000068657.1 |
| PDT000371383.2 | SAMD00083618 | SAMD00083618 | DRR107258   | GCA 003422025.1 | PDS000068657.1 |
| PDT000335423.2 | SAMN08717667 | SAMN08717667 | SRR7983577  | GCA 003239575.1 | PDS000068818.1 |
| PDT000335457.2 | SAMN08717619 | SAMN08717619 | SRR7983704  | GCA 003240295.1 | PDS000068818.1 |
| PDT000790287.2 | SAMEA4008741 | SAMEA4008741 | ERR1715442  | GCA 903803205.1 | PDS000068814.1 |
| PDT000813730.1 | SAMN12776103 | SAMN12776103 | SRR10179127 | GCA 009458985.1 | PDS000068821.1 |
| PDT000813794.1 | SAMN12776039 | SAMN12776039 | SRR10179199 | GCA 009460265.1 | PDS000068821.1 |
| PDT000335376.2 | SAMN08717641 | SAMN08717641 | SRR7983614  | GCA 003238685.1 | PDS000068819.1 |
| PDT000335387.2 | SAMN08717624 | SAMN08717624 | SRR7983642  | GCA 003238875.1 | PDS000068819.1 |
| PDT000335358.2 | SAMN08717692 | SAMN08717692 | SRR7983665  | GCA 003238315.1 | PDS000068822.1 |
| PDT000335361.2 | SAMN08717682 | SAMN08717682 | SRR7983686  | GCA 003238375.1 | PDS000068822.1 |
| PDT000335375.2 | SAMN08717645 | SAMN08717645 | SRR7983631  | GCA 003238655.1 | PDS000068820.1 |
| PDT000335442.2 | SAMN08717670 | SAMN08717670 | SRR7983584  | GCA 003239995.1 | PDS000068820.1 |
| PDT000343085.2 | SAMEA1466947 | SAMEA1466947 | ERR156458   | GCA 900482885.1 | PDS000068809.1 |
| PDT000343156.2 | SAMEA1469936 | SAMEA1469936 | ERR159043   | GCA 900483395.1 | PDS000068809.1 |
| PDT000343069.2 | SAMEA1466897 | SAMEA1466897 | ERR156520   | GCA 900482855.1 | PDS000068808.1 |
| PDT000343088.2 | SAMEA1469848 | SAMEA1469848 | ERR159054   | GCA 900483465.1 | PDS000068808.1 |
| PDT000766264.2 | SAMN14906929 | SAMN14906929 | SRR11787434 | GCA 013337865.1 | PDS000068961.1 |
| PDT000813646.1 | SAMN12776186 | SAMN12776186 | SRR10179077 | GCA 009457295.1 | PDS000068961.1 |
| PDT000090355.2 | SAMEA1463483 | SAMEA1463483 | ERR302734   | GCA 001349735.1 | PDS000068960.1 |
| PDT000090361.2 | SAMEA1708835 | SAMEA1708835 | ERR237625   | GCA 001349855.1 | PDS000068960.1 |
| PDT000083796.2 | SAMEA2384383 | SAMEA2384383 | ERR554306   | GCA 001289765.1 | PDS000069094.1 |
| PDT000083845.2 | SAMEA2383882 | SAMEA2383882 | ERR554091   | GCA 001290745.1 | PDS000069094.1 |
| PDT000083802.2 | SAMEA2236493 | SAMEA2236493 | ERR422946   | GCA 001289885.1 | PDS000069082.1 |
| PDT000083850.2 | SAMEA2384847 | SAMEA2384847 | ERR554769   | GCA 001290845.1 | PDS000069082.1 |
| PDT000079211.2 | SAMEA1324706 | SAMEA1324706 | ERR134704   | GCA 001199775.1 | PDS000069266.1 |
| PDT000079648.2 | SAMEA1324592 | SAMEA1324592 | ERR134697   | GCA 001208985.1 | PDS000069266.1 |
| PDT000079192.2 | SAMEA1324695 | SAMEA1324695 | ERR134750   | GCA 001199375.1 | PDS000069269.1 |
| PDT000090488.2 | SAMEA1324704 | SAMEA1324704 | ERR134749   | GCA 001352855.1 | PDS000069269.1 |
| PDT000079424.2 | SAMEA1466457 | SAMEA1466457 | ERR302813   | GCA 001204255.1 | PDS000069254.1 |
| PDT000090522.2 | SAMEA1466461 | SAMEA1466461 | ERR137976   | GCA 001353535.1 | PDS000069254.1 |
| PDT000079408.2 | SAMEA1466525 | SAMEA1466525 | ERR302791   | GCA 001203915.1 | PDS000069255.1 |
| PDT000090521.2 | SAMEA1466458 | SAMEA1466458 | ERR137940   | GCA 001353515.1 | PDS000069255.1 |
| PDT000079235.2 | SAMEA1324770 | SAMEA1324770 | ERR134670   | GCA 001200275.1 | PDS000069265.1 |
| PDT000090504.2 | SAMEA1324744 | SAMEA1324744 | ERR134671   | GCA 001353175.1 | PDS000069265.1 |
| PDT000078885.2 | SAMEA1324520 | SAMEA1324520 | ERR134613   | GCA 001192955.1 | PDS000069267.1 |
| PDT000079206.2 | SAMEA1324512 | SAMEA1324512 | ERR134612   | GCA 001199675.1 | PDS000069267.1 |
| PDT000132863.2 | SAMEA2384039 | SAMEA2384039 | ERR540243   | GCA 900081105.1 | PDS000069257.1 |
| PDT000132953.2 | SAMEA2384118 | SAMEA2384118 | ERR540322   | GCA 900081185.1 | PDS000069257.1 |
| PDT000790610.2 | SAMEA4553059 | SAMEA4553059 | ERR1891790  | GCA 903805145.1 | PDS000069393.1 |
| PDT000790611.2 | SAMEA4553060 | SAMEA4553060 | ERR1891791  | GCA 903805165.1 | PDS000069393.1 |
| PDT000790407.2 | SAMEA4552971 | SAMEA4552971 | ERR3012697  | GCA 903804285.1 | PDS000069398.1 |
| PDT000790466.2 | SAMEA4552990 | SAMEA4552990 | ERR3012716  | GCA 903804475.1 | PDS000069398.1 |
| PDT000790396.2 | SAMEA4552968 | SAMEA4552968 | ERR3012694  | GCA 903804255.1 | PDS000069395.1 |

|                |                |                |             |                 |                |
|----------------|----------------|----------------|-------------|-----------------|----------------|
| PDT000790577.2 | SAMEA4553024   | SAMEA4553024   | ERR3012750  | GCA 903804815.1 | PDS000069395.1 |
| PDT000790609.2 | SAMEA4553058   | SAMEA4553058   | ERR1891789  | GCA 903805155.1 | PDS000069392.1 |
| PDT000790614.2 | SAMEA4553063   | SAMEA4553063   | ERR1891794  | GCA 903805195.1 | PDS000069392.1 |
| PDT000790453.2 | SAMEA4552987   | SAMEA4552987   | ERR3012713  | GCA 903804445.1 | PDS000069400.1 |
| PDT000790457.2 | SAMEA4552988   | SAMEA4552988   | ERR3012714  | GCA 903804455.1 | PDS000069400.1 |
| PDT000790625.2 | SAMEA4553074   | SAMEA4553074   | ERR1891805  | GCA 903805305.1 | PDS000069387.1 |
| PDT000790627.2 | SAMEA4553076   | SAMEA4553076   | ERR1891807  | GCA 903805325.1 | PDS000069387.1 |
| PDT000790514.2 | SAMEA4553001   | SAMEA4553001   | ERR3012727  | GCA 903804585.1 | PDS000069397.1 |
| PDT000790581.2 | SAMEA4553028   | SAMEA4553028   | ERR1891760  | GCA 903804855.1 | PDS000069397.1 |
| PDT000790463.2 | SAMEA4552989   | SAMEA4552989   | ERR3012715  | GCA 903804465.1 | PDS000069399.1 |
| PDT000790484.2 | SAMEA4552994   | SAMEA4552994   | ERR3012720  | GCA 903804505.1 | PDS000069399.1 |
| PDT000772294.2 | SAMN15215182   | SAMN15215182   | SRR12000724 | GCA 013371405.1 | PDS000069494.1 |
| PDT000772336.2 | SAMN15215159   | SAMN15215159   | SRR12000248 | GCA 013372705.1 | PDS000069494.1 |
| PDT000772369.2 | SAMEA103891242 | SAMEA103891242 | ERR2533473  | GCA 903811695.1 | PDS000069487.1 |
| PDT000772376.2 | SAMEA103891249 | SAMEA103891249 | ERR2533480  | GCA 903811765.1 | PDS000069487.1 |
| PDT000772383.2 | SAMEA103891256 | SAMEA103891256 | ERR2533487  | GCA 903811835.1 | PDS000069485.1 |
| PDT000772385.2 | SAMEA103891258 | SAMEA103891258 | ERR2533489  | GCA 903811855.1 | PDS000069485.1 |
| PDT000772367.2 | SAMEA103891240 | SAMEA103891240 | ERR2533471  | GCA 903811675.1 | PDS000069488.1 |
| PDT000772372.2 | SAMEA103891245 | SAMEA103891245 | ERR2533476  | GCA 903811725.1 | PDS000069488.1 |
| PDT000132747.2 | SAMEA2384853   | SAMEA2384853   | ERR554775   | GCA 900082795.1 | PDS000069490.1 |
| PDT000132814.2 | SAMEA2384836   | SAMEA2384836   | ERR554758   | GCA 900082685.1 | PDS000069490.1 |
| PDT000772353.2 | SAMEA103891226 | SAMEA103891226 | ERR2533457  | GCA 903811535.1 | PDS000069493.1 |
| PDT000772703.2 | SAMEA4008441   | SAMEA4008441   | ERR1723821  | GCA 903798485.1 | PDS000069493.1 |
| PDT000772355.2 | SAMEA103891228 | SAMEA103891228 | ERR2533459  | GCA 903811555.1 | PDS000069491.1 |
| PDT000772362.2 | SAMEA103891235 | SAMEA103891235 | ERR2533466  | GCA 903811625.1 | PDS000069491.1 |
| PDT000711843.2 | SAMN10875739   | SAMN10875739   | SRR11015933 | GCA 011319655.1 | PDS000069635.1 |
| PDT000722915.2 | SAMN10689365   | SAMN10689365   | SRR8389043  | GCA 012274645.1 | PDS000069635.1 |
| PDT000069548.2 | SAMEA1324588   | SAMEA1324588   | ERR134783   | GCA 001047795.1 | PDS000069644.1 |
| PDT000078876.2 | SAMEA1324610   | SAMEA1324610   | ERR134794   | GCA 001192755.1 | PDS000069644.1 |
| PDT000711837.2 | SAMN10875743   | SAMN10875743   | SRR11015929 | GCA 011319515.1 | PDS000069631.1 |
| PDT000722918.2 | SAMN10689408   | SAMN10689408   | SRR8389075  | GCA 012274705.1 | PDS000069631.1 |
| PDT000711841.2 | SAMN10875740   | SAMN10875740   | SRR11015932 | GCA 011319625.1 | PDS000069636.1 |
| PDT000722913.2 | SAMN10689380   | SAMN10689380   | SRR8389108  | GCA 012274605.1 | PDS000069636.1 |
| PDT000711844.2 | SAMN10875735   | SAMN10875735   | SRR11015937 | GCA 011319675.1 | PDS000069630.1 |
| PDT000722919.2 | SAMN10689358   | SAMN10689358   | SRR8389044  | GCA 012274715.1 | PDS000069630.1 |
| PDT000069576.2 | SAMEA3360373   | SAMEA3360373   | ERR868120   | GCA 001049655.1 | PDS000069638.1 |
| PDT000069578.2 | SAMEA3360373   | SAMEA3360373   | ERR868120   | GCA 001049695.1 | PDS000069638.1 |
| PDT000069575.2 | SAMEA3360372   | SAMEA3360372   | ERR868119   | GCA 001049635.1 | PDS000069641.1 |
| PDT000069577.2 | SAMEA3360372   | SAMEA3360372   | ERR868119   | GCA 001049675.1 | PDS000069641.1 |
| PDT000812748.1 | SAMN10038728   | SAMN10038728   | SRR7839498  | GCA 015570755.1 | PDS000069947.1 |
| PDT000812874.1 | SAMN10038817   | SAMN10038817   | SRR7839889  | GCA 015568065.1 | PDS000069947.1 |
| PDT000812858.1 | SAMN10038738   | SAMN10038738   | SRR7839852  | GCA 015568895.1 | PDS000069946.1 |
| PDT000812904.1 | SAMN10038838   | SAMN10038838   | SRR7839957  | GCA 015567435.1 | PDS000069946.1 |
| PDT000589559.1 | SAMN04505204   | SAMN04505204   | SRR3194943  | GCA 015601185.1 | PDS000069985.1 |
| PDT000589560.1 | SAMN04505205   | SAMN04505205   | SRR3194944  | GCA 015601125.1 | PDS000069985.1 |
| PDT000903124.1 | SAMN09401060   | SAMN09401060   | SRR7297577  | GCA 015712315.1 | PDS000069960.3 |
| PDT000904282.1 | SAMN09401054   | SAMN09401054   | SRR7297289  | GCA 015714985.1 | PDS000069960.3 |
| PDT000117196.2 | SAMEA1464288   | SAMEA1464288   | ERR124523   | GCA 900054925.1 | PDS000069967.1 |
| PDT000118375.2 | SAMEA1464368   | SAMEA1464368   | ERR124520   | GCA 900043615.1 | PDS000069967.1 |
| PDT000118428.2 | SAMEA1317363   | SAMEA1317363   | ERR107862   | GCA 900038755.1 | PDS000069956.1 |
| PDT000118999.2 | SAMEA1317370   | SAMEA1317370   | ERR107861   | GCA 900041905.1 | PDS000069956.1 |
| PDT000904327.1 | SAMN09401001   | SAMN09401001   | SRR7296877  | GCA 015715885.1 | PDS000076897.1 |
| PDT000904400.1 | SAMN09400923   | SAMN09400923   | SRR7297595  | GCA 015717345.1 | PDS000076897.1 |
| PDT000904337.1 | SAMN09400994   | SAMN09400994   | SRR7297468  | GCA 015716085.1 | PDS000076899.1 |
| PDT000904434.1 | SAMN09400893   | SAMN09400893   | SRR7297255  | GCA 015718085.1 | PDS000076899.1 |
| PDT000904517.1 | SAMN12220497   | SAMN12220497   | SRR9647372  | GCA 015725825.1 | PDS000076900.1 |
| PDT000904595.1 | SAMN11285055   | SAMN11285055   | SRR8810363  | GCA 015727465.1 | PDS000076900.1 |
| PDT000904320.1 | SAMN09401009   | SAMN09401009   | SRR7297240  | GCA 015715725.1 | PDS000076902.1 |
| PDT000904328.1 | SAMN09401003   | SAMN09401003   | SRR7296875  | GCA 015715895.1 | PDS000076902.1 |
| PDT000904654.1 | SAMN09401098   | SAMN09401098   | SRR7297137  | GCA 015728645.1 | PDS000076901.1 |
| PDT000904690.1 | SAMN09401065   | SAMN09401065   | SRR7296866  | GCA 015729355.1 | PDS000076901.1 |
| PDT000904391.1 | SAMN09400936   | SAMN09400936   | SRR7297535  | GCA 015717155.1 | PDS000076908.1 |
| PDT000904548.1 | SAMN11285102   | SAMN11285102   | SRR8809884  | GCA 015726445.1 | PDS000076908.1 |
| PDT000904529.1 | SAMN12220488   | SAMN12220488   | SRR9647465  | GCA 015726065.1 | PDS000076906.1 |
| PDT000904532.1 | SAMN12220487   | SAMN12220487   | SRR9647464  | GCA 015726095.1 | PDS000076906.1 |
| PDT000904347.1 | SAMN09400980   | SAMN09400980   | SRR7297158  | GCA 015716285.1 | PDS000076905.1 |
| PDT000904378.1 | SAMN09400950   | SAMN09400950   | SRR7297582  | GCA 015716905.1 | PDS000076905.1 |
| PDT000904297.1 | SAMN09401036   | SAMN09401036   | SRR7296961  | GCA 015715285.1 | PDS000076907.1 |

|                |              |              |            |                 |                |
|----------------|--------------|--------------|------------|-----------------|----------------|
| PDT000904324.1 | SAMN09401007 | SAMN09401007 | SRR7296871 | GCA 015715825.1 | PDS000076907.1 |
| PDT000669985.2 | SAMEA958794  | SAMEA958794  | ERR033070  | GCA 902713825.1 | PDS000069795.1 |
| PDT000669986.2 | SAMEA958835  | SAMEA958835  | ERR033079  | GCA 902713765.1 | PDS000069795.1 |
| PDT000670014.2 | SAMEA958814  | SAMEA958814  | ERR023869  | GCA 902714015.1 | PDS000069795.1 |
| PDT000670016.2 | SAMEA958858  | SAMEA958858  | ERR023880  | GCA 902713985.1 | PDS000069795.1 |
| PDT000670017.2 | SAMEA958810  | SAMEA958810  | ERR023867  | GCA 902714025.1 | PDS000069795.1 |
| PDT000670018.2 | SAMEA958848  | SAMEA958848  | ERR023884  | GCA 902713975.1 | PDS000069795.1 |
| PDT000670038.2 | SAMEA958859  | SAMEA958859  | ERR023903  | GCA 902714265.1 | PDS000069795.1 |
| PDT000670053.2 | SAMEA958990  | SAMEA958990  | ERR033831  | GCA 902714465.1 | PDS000069795.1 |
| PDT000670055.2 | SAMEA958985  | SAMEA958985  | ERR033821  | GCA 902714435.1 | PDS000069795.1 |
| PDT000670122.2 | SAMEA2080811 | SAMEA2080811 | ERR496653  | GCA 902715135.1 | PDS000069795.1 |
| PDT000670123.2 | SAMEA2078249 | SAMEA2078249 | ERR352968  | GCA 902715125.1 | PDS000069795.1 |
| PDT000670124.2 | SAMEA2078308 | SAMEA2078308 | ERR352963  | GCA 902715155.1 | PDS000069795.1 |
| PDT000670125.2 | SAMEA2078551 | SAMEA2078551 | ERR352972  | GCA 902715175.1 | PDS000069795.1 |
| PDT000670126.2 | SAMEA2080812 | SAMEA2080812 | ERR496656  | GCA 902715145.1 | PDS000069795.1 |
| PDT000670127.2 | SAMEA2078550 | SAMEA2078550 | ERR352969  | GCA 902715165.1 | PDS000069795.1 |
| PDT000670128.2 | SAMEA2078246 | SAMEA2078246 | ERR496651  | GCA 902715225.1 | PDS000069795.1 |
| PDT000670129.2 | SAMEA2078309 | SAMEA2078309 | ERR352966  | GCA 902715195.1 | PDS000069795.1 |
| PDT000670130.2 | SAMEA2078247 | SAMEA2078247 | ERR352962  | GCA 902715185.1 | PDS000069795.1 |
| PDT000670131.2 | SAMEA2078248 | SAMEA2078248 | ERR496657  | GCA 902715235.1 | PDS000069795.1 |
| PDT000670132.2 | SAMEA2080814 | SAMEA2080814 | ERR496662  | GCA 902715215.1 | PDS000069795.1 |
| PDT000670133.2 | SAMEA2078250 | SAMEA2078250 | ERR352971  | GCA 902715255.1 | PDS000069795.1 |
| PDT000670134.2 | SAMEA2078307 | SAMEA2078307 | ERR352960  | GCA 902715245.1 | PDS000069795.1 |
| PDT000670135.2 | SAMEA2080813 | SAMEA2080813 | ERR352967  | GCA 902715205.1 | PDS000069795.1 |
| PDT000670137.2 | SAMEA2078245 | SAMEA2078245 | ERR352956  | GCA 902715305.1 | PDS000069795.1 |
| PDT000670138.2 | SAMEA2080721 | SAMEA2080721 | ERR496647  | GCA 902715295.1 | PDS000069795.1 |
| PDT000670146.2 | SAMEA2080810 | SAMEA2080810 | ERR352958  | GCA 902715355.1 | PDS000069795.1 |
| PDT000670151.2 | SAMEA1029568 | SAMEA1029568 | ERR064947  | GCA 902715405.1 | PDS000069795.1 |
| PDT000670153.2 | SAMEA2078306 | SAMEA2078306 | ERR352957  | GCA 902715445.1 | PDS000069795.1 |
| PDT000670156.2 | SAMEA2080815 | SAMEA2080815 | ERR496665  | GCA 902715465.1 | PDS000069795.1 |
| PDT000670157.2 | SAMEA2078251 | SAMEA2078251 | ERR352974  | GCA 902715485.1 | PDS000069795.1 |
| PDT000670158.2 | SAMEA2078553 | SAMEA2078553 | ERR352978  | GCA 902715505.1 | PDS000069795.1 |
| PDT000670159.2 | SAMEA2078252 | SAMEA2078252 | ERR496669  | GCA 902715475.1 | PDS000069795.1 |
| PDT000670160.2 | SAMEA2078552 | SAMEA2078552 | ERR352975  | GCA 902715515.1 | PDS000069795.1 |
| PDT000670161.2 | SAMEA2080893 | SAMEA2080893 | ERR352976  | GCA 902715495.1 | PDS000069795.1 |
| PDT000670162.2 | SAMEA2080894 | SAMEA2080894 | ERR496671  | GCA 902715645.1 | PDS000069795.1 |
| PDT000670163.2 | SAMEA2078557 | SAMEA2078557 | ERR352990  | GCA 902715555.1 | PDS000069795.1 |
| PDT000670164.2 | SAMEA2080895 | SAMEA2080895 | ERR352985  | GCA 902715595.1 | PDS000069795.1 |
| PDT000670165.2 | SAMEA2078254 | SAMEA2078254 | ERR352983  | GCA 902715545.1 | PDS000069795.1 |
| PDT000670166.2 | SAMEA2078255 | SAMEA2078255 | ERR352986  | GCA 902715585.1 | PDS000069795.1 |
| PDT000670167.2 | SAMEA2080897 | SAMEA2080897 | ERR352991  | GCA 902715625.1 | PDS000069795.1 |
| PDT000670168.2 | SAMEA1971275 | SAMEA1971275 | ERR352982  | GCA 902715525.1 | PDS000069795.1 |
| PDT000670169.2 | SAMEA2078253 | SAMEA2078253 | ERR496672  | GCA 902715535.1 | PDS000069795.1 |
| PDT000670170.2 | SAMEA2080896 | SAMEA2080896 | ERR352988  | GCA 902715605.1 | PDS000069795.1 |
| PDT000670171.2 | SAMEA2078554 | SAMEA2078554 | ERR496673  | GCA 902715565.1 | PDS000069795.1 |
| PDT000670172.2 | SAMEA2078256 | SAMEA2078256 | ERR352989  | GCA 902715615.1 | PDS000069795.1 |
| PDT000670173.2 | SAMEA2078555 | SAMEA2078555 | ERR352984  | GCA 902715575.1 | PDS000069795.1 |
| PDT000670174.2 | SAMEA2078257 | SAMEA2078257 | ERR352992  | GCA 902715635.1 | PDS000069795.1 |
| PDT000670175.2 | SAMEA2078556 | SAMEA2078556 | ERR352987  | GCA 902715655.1 | PDS000069795.1 |
| PDT000670176.2 | SAMEA2080898 | SAMEA2080898 | ERR352994  | GCA 902715675.1 | PDS000069795.1 |
| PDT000670177.2 | SAMEA2078558 | SAMEA2078558 | ERR496685  | GCA 902715665.1 | PDS000069795.1 |
| PDT000670178.2 | SAMEA2080902 | SAMEA2080902 | ERR496701  | GCA 902715745.1 | PDS000069795.1 |
| PDT000670179.2 | SAMEA2078260 | SAMEA2078260 | ERR496693  | GCA 902715715.1 | PDS000069795.1 |
| PDT000670180.2 | SAMEA2078562 | SAMEA2078562 | ERR353004  | GCA 902715735.1 | PDS000069795.1 |
| PDT000670181.2 | SAMEA2078563 | SAMEA2078563 | ERR496697  | GCA 902715775.1 | PDS000069795.1 |
| PDT000670182.2 | SAMEA2078561 | SAMEA2078561 | ERR496694  | GCA 902715685.1 | PDS000069795.1 |
| PDT000670183.2 | SAMEA2078566 | SAMEA2078566 | ERR496703  | GCA 902715765.1 | PDS000069795.1 |
| PDT000670184.2 | SAMEA2078564 | SAMEA2078564 | ERR353008  | GCA 902715725.1 | PDS000069795.1 |
| PDT000670185.2 | SAMEA2080900 | SAMEA2080900 | ERR496692  | GCA 902715785.1 | PDS000069795.1 |
| PDT000670186.2 | SAMEA1965205 | SAMEA1965205 | ERR496698  | GCA 902715705.1 | PDS000069795.1 |
| PDT000670187.2 | SAMEA2080899 | SAMEA2080899 | ERR496689  | GCA 902715695.1 | PDS000069795.1 |
| PDT000670188.2 | SAMEA2078565 | SAMEA2078565 | ERR353010  | GCA 902715755.1 | PDS000069795.1 |
| PDT000670189.2 | SAMEA2080901 | SAMEA2080901 | ERR353003  | GCA 902715825.1 | PDS000069795.1 |
| PDT000670190.2 | SAMEA1971587 | SAMEA1971587 | ERR496699  | GCA 902715815.1 | PDS000069795.1 |
| PDT000670191.2 | SAMEA2078560 | SAMEA2078560 | ERR496691  | GCA 902715845.1 | PDS000069795.1 |
| PDT000670192.2 | SAMEA2078567 | SAMEA2078567 | ERR496705  | GCA 902715795.1 | PDS000069795.1 |
| PDT000670193.2 | SAMEA2078258 | SAMEA2078258 | ERR352995  | GCA 902715805.1 | PDS000069795.1 |
| PDT000670194.2 | SAMEA2080903 | SAMEA2080903 | ERR353012  | GCA 902715855.1 | PDS000069795.1 |

|                |              |              |           |                 |                |
|----------------|--------------|--------------|-----------|-----------------|----------------|
| PDT000670195.2 | SAMEA2078559 | SAMEA2078559 | ERR352996 | GCA 902715835.1 | PDS000069795.1 |
| PDT000670196.2 | SAMEA2078259 | SAMEA2078259 | ERR352998 | GCA 902715865.1 | PDS000069795.1 |
| PDT000670197.2 | SAMEA2080904 | SAMEA2080904 | ERR496707 | GCA 902715905.1 | PDS000069795.1 |
| PDT000670198.2 | SAMEA1972809 | SAMEA1972809 | ERR353016 | GCA 902715875.1 | PDS000069795.1 |
| PDT000670199.2 | SAMEA2078569 | SAMEA2078569 | ERR496709 | GCA 902715895.1 | PDS000069795.1 |
| PDT000670200.2 | SAMEA2078568 | SAMEA2078568 | ERR353014 | GCA 902715885.1 | PDS000069795.1 |
| PDT000670201.2 | SAMEA2078571 | SAMEA2078571 | ERR496712 | GCA 902715925.1 | PDS000069795.1 |
| PDT000670202.2 | SAMEA2080905 | SAMEA2080905 | ERR353018 | GCA 902715935.1 | PDS000069795.1 |
| PDT000670203.2 | SAMEA2080906 | SAMEA2080906 | ERR496713 | GCA 902715915.1 | PDS000069795.1 |
| PDT000670204.2 | SAMEA2078570 | SAMEA2078570 | ERR353019 | GCA 902715945.1 | PDS000069795.1 |
| PDT000670205.2 | SAMEA2078572 | SAMEA2078572 | ERR496714 | GCA 902715955.1 | PDS000069795.1 |
| PDT000670206.2 | SAMEA1967537 | SAMEA1967537 | ERR496715 | GCA 902715965.1 | PDS000069795.1 |
| PDT000670207.2 | SAMEA1971093 | SAMEA1971093 | ERR496717 | GCA 902715985.1 | PDS000069795.1 |
| PDT000670208.2 | SAMEA2080907 | SAMEA2080907 | ERR496716 | GCA 902715975.1 | PDS000069795.1 |
| PDT000670209.2 | SAMEA2078816 | SAMEA2078816 | ERR353026 | GCA 902715995.1 | PDS000069795.1 |
| PDT000670210.2 | SAMEA2080908 | SAMEA2080908 | ERR353027 | GCA 902716005.1 | PDS000069795.1 |
| PDT000670211.2 | SAMEA2078823 | SAMEA2078823 | ERR353037 | GCA 902716015.1 | PDS000069795.1 |
| PDT000670212.2 | SAMEA2078819 | SAMEA2078819 | ERR353031 | GCA 902716025.1 | PDS000069795.1 |
| PDT000670213.2 | SAMEA2078826 | SAMEA2078826 | ERR496733 | GCA 902716095.1 | PDS000069795.1 |
| PDT000670214.2 | SAMEA2078825 | SAMEA2078825 | ERR496732 | GCA 902716065.1 | PDS000069795.1 |
| PDT000670215.2 | SAMEA2078824 | SAMEA2078824 | ERR353038 | GCA 902716105.1 | PDS000069795.1 |
| PDT000670216.2 | SAMEA2078817 | SAMEA2078817 | ERR496720 | GCA 902716085.1 | PDS000069795.1 |
| PDT000670217.2 | SAMEA2078828 | SAMEA2078828 | ERR353044 | GCA 902716035.1 | PDS000069795.1 |
| PDT000670218.2 | SAMEA2080911 | SAMEA2080911 | ERR496728 | GCA 902716075.1 | PDS000069795.1 |
| PDT000670219.2 | SAMEA2080909 | SAMEA2080909 | ERR353030 | GCA 902716045.1 | PDS000069795.1 |
| PDT000670220.2 | SAMEA2080910 | SAMEA2080910 | ERR496725 | GCA 902716055.1 | PDS000069795.1 |
| PDT000670221.2 | SAMEA2078827 | SAMEA2078827 | ERR353043 | GCA 902716115.1 | PDS000069795.1 |
| PDT000670222.2 | SAMEA2078821 | SAMEA2078821 | ERR353034 | GCA 902716135.1 | PDS000069795.1 |
| PDT000670223.2 | SAMEA2078818 | SAMEA2078818 | ERR353029 | GCA 902716165.1 | PDS000069795.1 |
| PDT000670224.2 | SAMEA2078820 | SAMEA2078820 | ERR353032 | GCA 902716145.1 | PDS000069795.1 |
| PDT000670225.2 | SAMEA2080912 | SAMEA2080912 | ERR353042 | GCA 902716175.1 | PDS000069795.1 |
| PDT000670226.2 | SAMEA2078822 | SAMEA2078822 | ERR353035 | GCA 902716155.1 | PDS000069795.1 |
| PDT000670227.2 | SAMEA1973182 | SAMEA1973182 | ERR496731 | GCA 902716125.1 | PDS000069795.1 |
| PDT000670228.2 | SAMEA2080913 | SAMEA2080913 | ERR496737 | GCA 902716195.1 | PDS000069795.1 |
| PDT000670229.2 | SAMEA2080914 | SAMEA2080914 | ERR496740 | GCA 902716185.1 | PDS000069795.1 |
| PDT000670230.2 | SAMEA2078834 | SAMEA2078834 | ERR357860 | GCA 902716235.1 | PDS000069795.1 |
| PDT000670231.2 | SAMEA2078832 | SAMEA2078832 | ERR485366 | GCA 902716215.1 | PDS000069795.1 |
| PDT000670232.2 | SAMEA2078836 | SAMEA2078836 | ERR496927 | GCA 902716245.1 | PDS000069795.1 |
| PDT000670233.2 | SAMEA2078833 | SAMEA2078833 | ERR485368 | GCA 902716265.1 | PDS000069795.1 |
| PDT000670234.2 | SAMEA2078829 | SAMEA2078829 | ERR496738 | GCA 902716225.1 | PDS000069795.1 |
| PDT000670235.2 | SAMEA2078830 | SAMEA2078830 | ERR496739 | GCA 902716255.1 | PDS000069795.1 |
| PDT000670236.2 | SAMEA2081043 | SAMEA2081043 | ERR485367 | GCA 902716205.1 | PDS000069795.1 |
| PDT000670237.2 | SAMEA2078835 | SAMEA2078835 | ERR357862 | GCA 902716275.1 | PDS000069795.1 |
| PDT000670238.2 | SAMEA2078831 | SAMEA2078831 | ERR357856 | GCA 902716285.1 | PDS000069795.1 |
| PDT000670239.2 | SAMEA2081044 | SAMEA2081044 | ERR485370 | GCA 902716295.1 | PDS000069795.1 |
| PDT000670240.2 | SAMEA2078838 | SAMEA2078838 | ERR485375 | GCA 902716315.1 | PDS000069795.1 |
| PDT000670241.2 | SAMEA1971341 | SAMEA1971341 | ERR485379 | GCA 902716305.1 | PDS000069795.1 |
| PDT000670242.2 | SAMEA2079047 | SAMEA2079047 | ERR357869 | GCA 902716335.1 | PDS000069795.1 |
| PDT000670243.2 | SAMEA2078837 | SAMEA2078837 | ERR485374 | GCA 902716355.1 | PDS000069795.1 |
| PDT000670244.2 | SAMEA2081046 | SAMEA2081046 | ERR485376 | GCA 902716375.1 | PDS000069795.1 |
| PDT000670245.2 | SAMEA2079046 | SAMEA2079046 | ERR485377 | GCA 902716365.1 | PDS000069795.1 |
| PDT000670246.2 | SAMEA2079050 | SAMEA2079050 | ERR485383 | GCA 902716325.1 | PDS000069795.1 |
| PDT000670247.2 | SAMEA2079049 | SAMEA2079049 | ERR357872 | GCA 902716345.1 | PDS000069795.1 |
| PDT000670248.2 | SAMEA2081045 | SAMEA2081045 | ERR357864 | GCA 902716385.1 | PDS000069795.1 |
| PDT000670249.2 | SAMEA2081047 | SAMEA2081047 | ERR357873 | GCA 902716395.1 | PDS000069795.1 |
| PDT000670250.2 | SAMEA2079048 | SAMEA2079048 | ERR357871 | GCA 902716405.1 | PDS000069795.1 |
| PDT000670251.2 | SAMEA2079051 | SAMEA2079051 | ERR485384 | GCA 902716445.1 | PDS000069795.1 |
| PDT000670252.2 | SAMEA2079053 | SAMEA2079053 | ERR485387 | GCA 902716425.1 | PDS000069795.1 |
| PDT000670253.2 | SAMEA2079052 | SAMEA2079052 | ERR485386 | GCA 902716415.1 | PDS000069795.1 |
| PDT000670254.2 | SAMEA2081048 | SAMEA2081048 | ERR357876 | GCA 902716435.1 | PDS000069795.1 |
| PDT000670255.2 | SAMEA1973412 | SAMEA1973412 | ERR485399 | GCA 902716475.1 | PDS000069795.1 |
| PDT000670256.2 | SAMEA2079054 | SAMEA2079054 | ERR485389 | GCA 902716455.1 | PDS000069795.1 |
| PDT000670257.2 | SAMEA2081049 | SAMEA2081049 | ERR485388 | GCA 902716485.1 | PDS000069795.1 |
| PDT000670258.2 | SAMEA2079056 | SAMEA2079056 | ERR357883 | GCA 902716465.1 | PDS000069795.1 |
| PDT000670259.2 | SAMEA2079055 | SAMEA2079055 | ERR485390 | GCA 902716525.1 | PDS000069795.1 |
| PDT000670260.2 | SAMEA1964876 | SAMEA1964876 | ERR357888 | GCA 902716545.1 | PDS000069795.1 |
| PDT000670261.2 | SAMEA2081050 | SAMEA2081050 | ERR485391 | GCA 902716515.1 | PDS000069795.1 |
| PDT000670262.2 | SAMEA2079061 | SAMEA2079061 | ERR357892 | GCA 902716495.1 | PDS000069795.1 |

|                |              |              |           |                 |                |
|----------------|--------------|--------------|-----------|-----------------|----------------|
| PDT000670263.2 | SAMEA2079059 | SAMEA2079059 | ERR485396 | GCA 902716535.1 | PDS000069795.1 |
| PDT000670264.2 | SAMEA2079060 | SAMEA2079060 | ERR357889 | GCA 902716575.1 | PDS000069795.1 |
| PDT000670265.2 | SAMEA2081051 | SAMEA2081051 | ERR357885 | GCA 902716565.1 | PDS000069795.1 |
| PDT000670266.2 | SAMEA2081052 | SAMEA2081052 | ERR357891 | GCA 902716555.1 | PDS000069795.1 |
| PDT000670267.2 | SAMEA2079057 | SAMEA2079057 | ERR357884 | GCA 902716585.1 | PDS000069795.1 |
| PDT000670268.2 | SAMEA2079058 | SAMEA2079058 | ERR357886 | GCA 902716505.1 | PDS000069795.1 |
| PDT000670269.2 | SAMEA2079062 | SAMEA2079062 | ERR485402 | GCA 902716595.1 | PDS000069795.1 |
| PDT000670270.2 | SAMEA2081053 | SAMEA2081053 | ERR485403 | GCA 902716605.1 | PDS000069795.1 |
| PDT000670271.2 | SAMEA2079064 | SAMEA2079064 | ERR485405 | GCA 902716745.1 | PDS000069795.1 |
| PDT000670273.2 | SAMEA2079065 | SAMEA2079065 | ERR485407 | GCA 902716715.1 | PDS000069795.1 |
| PDT000670283.2 | SAMEA2079066 | SAMEA2079066 | ERR357899 | GCA 902716725.1 | PDS000069795.1 |
| PDT000670287.2 | SAMEA2081055 | SAMEA2081055 | ERR485409 | GCA 902716785.1 | PDS000069795.1 |
| PDT000670289.2 | SAMEA2081054 | SAMEA2081054 | ERR485406 | GCA 902716775.1 | PDS000069795.1 |
| PDT000670290.2 | SAMEA2079063 | SAMEA2079063 | ERR357895 | GCA 902716805.1 | PDS000069795.1 |
| PDT000670294.2 | SAMEA2081056 | SAMEA2081056 | ERR485412 | GCA 902716855.1 | PDS000069795.1 |
| PDT000670297.2 | SAMEA2079067 | SAMEA2079067 | ERR357901 | GCA 902716905.1 | PDS000069795.1 |
| PDT000670299.2 | SAMEA2079068 | SAMEA2079068 | ERR357902 | GCA 902716975.1 | PDS000069795.1 |
| PDT000670305.2 | SAMEA2079283 | SAMEA2079283 | ERR485429 | GCA 902716875.1 | PDS000069795.1 |
| PDT000670319.2 | SAMEA2081063 | SAMEA2081063 | ERR485433 | GCA 902717135.1 | PDS000069795.1 |
| PDT000670320.2 | SAMEA2081064 | SAMEA2081064 | ERR485436 | GCA 902717025.1 | PDS000069795.1 |
| PDT000670321.2 | SAMEA2081062 | SAMEA2081062 | ERR357921 | GCA 902717185.1 | PDS000069795.1 |
| PDT000670326.2 | SAMEA2079285 | SAMEA2079285 | ERR485432 | GCA 902717175.1 | PDS000069795.1 |
| PDT000670327.2 | SAMEA2079287 | SAMEA2079287 | ERR485435 | GCA 902717105.1 | PDS000069795.1 |
| PDT000670328.2 | SAMEA2079286 | SAMEA2079286 | ERR357925 | GCA 902717155.1 | PDS000069795.1 |
| PDT000670330.2 | SAMEA2079284 | SAMEA2079284 | ERR485431 | GCA 902717205.1 | PDS000069795.1 |
| PDT000670336.2 | SAMEA2079503 | SAMEA2079503 | ERR357948 | GCA 902717335.1 | PDS000069795.1 |
| PDT000670470.2 | SAMEA1967479 | SAMEA1967479 | ERR485317 | GCA 902718585.1 | PDS000069795.1 |
| PDT000670474.2 | SAMEA2076465 | SAMEA2076465 | ERR358005 | GCA 902718655.1 | PDS000069795.1 |
| PDT000670475.2 | SAMEA2076462 | SAMEA2076462 | ERR357999 | GCA 902718675.1 | PDS000069795.1 |
| PDT000670476.2 | SAMEA2081461 | SAMEA2081461 | ERR358000 | GCA 902718725.1 | PDS000069795.1 |
| PDT000670477.2 | SAMEA2076470 | SAMEA2076470 | ERR485333 | GCA 902718735.1 | PDS000069795.1 |
| PDT000670478.2 | SAMEA2081463 | SAMEA2081463 | ERR485326 | GCA 902718695.1 | PDS000069795.1 |
| PDT000670479.2 | SAMEA2076463 | SAMEA2076463 | ERR358002 | GCA 902718715.1 | PDS000069795.1 |
| PDT000670480.2 | SAMEA2076469 | SAMEA2076469 | ERR485331 | GCA 902718665.1 | PDS000069795.1 |
| PDT000670481.2 | SAMEA2076467 | SAMEA2076467 | ERR485328 | GCA 902718745.1 | PDS000069795.1 |
| PDT000670482.2 | SAMEA2081462 | SAMEA2081462 | ERR358003 | GCA 902718705.1 | PDS000069795.1 |
| PDT000670483.2 | SAMEA2081464 | SAMEA2081464 | ERR485329 | GCA 902718755.1 | PDS000069795.1 |
| PDT000670484.2 | SAMEA2081466 | SAMEA2081466 | ERR485335 | GCA 902718685.1 | PDS000069795.1 |
| PDT000670485.2 | SAMEA2076461 | SAMEA2076461 | ERR357998 | GCA 902718785.1 | PDS000069795.1 |
| PDT000670486.2 | SAMEA2076473 | SAMEA2076473 | ERR485337 | GCA 902718835.1 | PDS000069795.1 |
| PDT000670487.2 | SAMEA1971923 | SAMEA1971923 | ERR358001 | GCA 902718845.1 | PDS000069795.1 |
| PDT000670488.2 | SAMEA2076468 | SAMEA2076468 | ERR485330 | GCA 902718805.1 | PDS000069795.1 |
| PDT000670489.2 | SAMEA2076464 | SAMEA2076464 | ERR358004 | GCA 902718825.1 | PDS000069795.1 |
| PDT000670490.2 | SAMEA2076472 | SAMEA2076472 | ERR358016 | GCA 902718775.1 | PDS000069795.1 |
| PDT000670491.2 | SAMEA2081465 | SAMEA2081465 | ERR358012 | GCA 902718795.1 | PDS000069795.1 |
| PDT000670492.2 | SAMEA2076466 | SAMEA2076466 | ERR485327 | GCA 902718815.1 | PDS000069795.1 |
| PDT000670493.2 | SAMEA2076471 | SAMEA2076471 | ERR485334 | GCA 902718765.1 | PDS000069795.1 |
| PDT000670494.2 | SAMEA2076477 | SAMEA2076477 | ERR358023 | GCA 902719005.1 | PDS000069795.1 |
| PDT000670495.2 | SAMEA2076479 | SAMEA2076479 | ERR485346 | GCA 902718915.1 | PDS000069795.1 |
| PDT000670496.2 | SAMEA2076741 | SAMEA2076741 | ERR485355 | GCA 902718865.1 | PDS000069795.1 |
| PDT000670497.2 | SAMEA2076474 | SAMEA2076474 | ERR485339 | GCA 902718875.1 | PDS000069795.1 |
| PDT000670498.2 | SAMEA2076475 | SAMEA2076475 | ERR358020 | GCA 902718985.1 | PDS000069795.1 |
| PDT000670499.2 | SAMEA2081467 | SAMEA2081467 | ERR358018 | GCA 902718945.1 | PDS000069795.1 |
| PDT000670500.2 | SAMEA2081471 | SAMEA2081471 | ERR485350 | GCA 902719035.1 | PDS000069795.1 |
| PDT000670501.2 | SAMEA2076484 | SAMEA2076484 | ERR358034 | GCA 902719025.1 | PDS000069795.1 |
| PDT000675943.2 | SAMEA2081473 | SAMEA2081473 | ERR485356 | GCA 902718935.1 | PDS000069795.1 |
| PDT000675944.2 | SAMEA2076480 | SAMEA2076480 | ERR485348 | GCA 902718975.1 | PDS000069795.1 |
| PDT000675945.2 | SAMEA2081470 | SAMEA2081470 | ERR485347 | GCA 902719015.1 | PDS000069795.1 |
| PDT000675946.2 | SAMEA2076482 | SAMEA2076482 | ERR485351 | GCA 902718925.1 | PDS000069795.1 |
| PDT000675947.2 | SAMEA2081469 | SAMEA2081469 | ERR485344 | GCA 902718965.1 | PDS000069795.1 |
| PDT000675948.2 | SAMEA2076483 | SAMEA2076483 | ERR358032 | GCA 902718995.1 | PDS000069795.1 |
| PDT000675949.2 | SAMEA2076481 | SAMEA2076481 | ERR358029 | GCA 902718885.1 | PDS000069795.1 |
| PDT000675950.2 | SAMEA2076742 | SAMEA2076742 | ERR485357 | GCA 902718895.1 | PDS000069795.1 |
| PDT000675951.2 | SAMEA2076478 | SAMEA2076478 | ERR485345 | GCA 902718905.1 | PDS000069795.1 |
| PDT000675953.2 | SAMEA2076476 | SAMEA2076476 | ERR358022 | GCA 902719045.1 | PDS000069795.1 |
| PDT000675954.2 | SAMEA2081468 | SAMEA2081468 | ERR485341 | GCA 902718955.1 | PDS000069795.1 |
| PDT000675955.2 | SAMEA2076745 | SAMEA2076745 | ERR485361 | GCA 902719075.1 | PDS000069795.1 |
| PDT000675956.2 | SAMEA2076750 | SAMEA2076750 | ERR358049 | GCA 902719175.1 | PDS000069795.1 |

|                |              |              |           |                 |                |
|----------------|--------------|--------------|-----------|-----------------|----------------|
| PDT000675957.2 | SAMEA2081475 | SAMEA2081475 | ERR485362 | GCA 902719065.1 | PDS000069795.1 |
| PDT000675958.2 | SAMEA2076744 | SAMEA2076744 | ERR358040 | GCA 902719055.1 | PDS000069795.1 |
| PDT000675959.2 | SAMEA2081479 | SAMEA2081479 | ERR358057 | GCA 902719085.1 | PDS000069795.1 |
| PDT000675960.2 | SAMEA1966505 | SAMEA1966505 | ERR358045 | GCA 902719145.1 | PDS000069795.1 |
| PDT000675961.2 | SAMEA2076748 | SAMEA2076748 | ERR485461 | GCA 902719095.1 | PDS000069795.1 |
| PDT000675962.2 | SAMEA2076747 | SAMEA2076747 | ERR485459 | GCA 902719135.1 | PDS000069795.1 |
| PDT000675963.2 | SAMEA2081476 | SAMEA2081476 | ERR358048 | GCA 902719115.1 | PDS000069795.1 |
| PDT000675964.2 | SAMEA2076743 | SAMEA2076743 | ERR358038 | GCA 902719225.1 | PDS000069795.1 |
| PDT000675965.2 | SAMEA2076752 | SAMEA2076752 | ERR485467 | GCA 902719165.1 | PDS000069795.1 |
| PDT000675966.2 | SAMEA2081478 | SAMEA2081478 | ERR485469 | GCA 902719125.1 | PDS000069795.1 |
| PDT000675967.2 | SAMEA2076754 | SAMEA2076754 | ERR485470 | GCA 902719195.1 | PDS000069795.1 |
| PDT000675968.2 | SAMEA2076746 | SAMEA2076746 | ERR485458 | GCA 902719155.1 | PDS000069795.1 |
| PDT000675969.2 | SAMEA2081477 | SAMEA2081477 | ERR485466 | GCA 902719205.1 | PDS000069795.1 |
| PDT000675970.2 | SAMEA2081474 | SAMEA2081474 | ERR358039 | GCA 902719235.1 | PDS000069795.1 |
| PDT000675971.2 | SAMEA2076749 | SAMEA2076749 | ERR485462 | GCA 902719215.1 | PDS000069795.1 |
| PDT000675972.2 | SAMEA2076751 | SAMEA2076751 | ERR358050 | GCA 902719185.1 | PDS000069795.1 |
| PDT000675973.2 | SAMEA2076755 | SAMEA2076755 | ERR485471 | GCA 902719105.1 | PDS000069795.1 |
| PDT000675974.2 | SAMEA2076753 | SAMEA2076753 | ERR358053 | GCA 902719245.1 | PDS000069795.1 |
| PDT000675975.2 | SAMEA2081563 | SAMEA2081563 | ERR358072 | GCA 902719375.1 | PDS000069795.1 |
| PDT000675976.2 | SAMEA2077026 | SAMEA2077026 | ERR358077 | GCA 902719335.1 | PDS000069795.1 |
| PDT000675977.2 | SAMEA2076758 | SAMEA2076758 | ERR358061 | GCA 902719315.1 | PDS000069795.1 |
| PDT000675979.2 | SAMEA2076759 | SAMEA2076759 | ERR485477 | GCA 902719275.1 | PDS000069795.1 |
| PDT000675980.2 | SAMEA2077023 | SAMEA2077023 | ERR485488 | GCA 902719255.1 | PDS000069795.1 |
| PDT000675981.2 | SAMEA2081564 | SAMEA2081564 | ERR358075 | GCA 902719325.1 | PDS000069795.1 |
| PDT000675982.2 | SAMEA2081561 | SAMEA2081561 | ERR485481 | GCA 902719305.1 | PDS000069795.1 |
| PDT000675984.2 | SAMEA2076760 | SAMEA2076760 | ERR358064 | GCA 902719295.1 | PDS000069795.1 |
| PDT000675985.2 | SAMEA2076756 | SAMEA2076756 | ERR358058 | GCA 902719415.1 | PDS000069795.1 |
| PDT000675986.2 | SAMEA2076765 | SAMEA2076765 | ERR358071 | GCA 902719435.1 | PDS000069795.1 |
| PDT000675987.2 | SAMEA2081480 | SAMEA2081480 | ERR485475 | GCA 902719355.1 | PDS000069795.1 |
| PDT000675988.2 | SAMEA2077024 | SAMEA2077024 | ERR358074 | GCA 902719425.1 | PDS000069795.1 |
| PDT000675989.2 | SAMEA2076757 | SAMEA2076757 | ERR485474 | GCA 902719405.1 | PDS000069795.1 |
| PDT000675990.2 | SAMEA2076764 | SAMEA2076764 | ERR485485 | GCA 902719385.1 | PDS000069795.1 |
| PDT000675991.2 | SAMEA2077025 | SAMEA2077025 | ERR358076 | GCA 902719365.1 | PDS000069795.1 |
| PDT000675992.2 | SAMEA2076761 | SAMEA2076761 | ERR358065 | GCA 902719345.1 | PDS000069795.1 |
| PDT000675993.2 | SAMEA2081560 | SAMEA2081560 | ERR485478 | GCA 902719395.1 | PDS000069795.1 |
| PDT000675994.2 | SAMEA2081562 | SAMEA2081562 | ERR358069 | GCA 902719445.1 | PDS000069795.1 |
| PDT000675995.2 | SAMEA2077033 | SAMEA2077033 | ERR485503 | GCA 902719495.1 | PDS000069795.1 |
| PDT000675996.2 | SAMEA2077031 | SAMEA2077031 | ERR485500 | GCA 902719535.1 | PDS000069795.1 |
| PDT000675997.2 | SAMEA2081570 | SAMEA2081570 | ERR358093 | GCA 902719455.1 | PDS000069795.1 |
| PDT000675998.2 | SAMEA2077027 | SAMEA2077027 | ERR358079 | GCA 902719515.1 | PDS000069795.1 |
| PDT000675999.2 | SAMEA2081565 | SAMEA2081565 | ERR485493 | GCA 902719485.1 | PDS000069795.1 |
| PDT000676000.2 | SAMEA2077039 | SAMEA2077039 | ERR485512 | GCA 902719525.1 | PDS000069795.1 |
| PDT000676001.2 | SAMEA2077036 | SAMEA2077036 | ERR485507 | GCA 902719505.1 | PDS000069795.1 |
| PDT000676002.2 | SAMEA2077037 | SAMEA2077037 | ERR485509 | GCA 902719545.1 | PDS000069795.1 |
| PDT000676003.2 | SAMEA2081567 | SAMEA2081567 | ERR358084 | GCA 902719475.1 | PDS000069795.1 |
| PDT000676004.2 | SAMEA2077028 | SAMEA2077028 | ERR485495 | GCA 902719465.1 | PDS000069795.1 |
| PDT000676005.2 | SAMEA2081571 | SAMEA2081571 | ERR358096 | GCA 902719615.1 | PDS000069795.1 |
| PDT000676006.2 | SAMEA2077030 | SAMEA2077030 | ERR485498 | GCA 902719605.1 | PDS000069795.1 |
| PDT000676007.2 | SAMEA2081566 | SAMEA2081566 | ERR485496 | GCA 902719645.1 | PDS000069795.1 |
| PDT000676008.2 | SAMEA2077032 | SAMEA2077032 | ERR358086 | GCA 902719635.1 | PDS000069795.1 |
| PDT000676009.2 | SAMEA2077029 | SAMEA2077029 | ERR485497 | GCA 902719575.1 | PDS000069795.1 |
| PDT000676011.2 | SAMEA2081569 | SAMEA2081569 | ERR485505 | GCA 902719595.1 | PDS000069795.1 |
| PDT000676012.2 | SAMEA2077035 | SAMEA2077035 | ERR485506 | GCA 902719565.1 | PDS000069795.1 |
| PDT000676013.2 | SAMEA2077038 | SAMEA2077038 | ERR485510 | GCA 902719585.1 | PDS000069795.1 |
| PDT000676014.2 | SAMEA2081568 | SAMEA2081568 | ERR485502 | GCA 902719555.1 | PDS000069795.1 |
| PDT000676015.2 | SAMEA2081572 | SAMEA2081572 | ERR485514 | GCA 902719655.1 | PDS000069795.1 |
| PDT000676016.2 | SAMEA2077297 | SAMEA2077297 | ERR485531 | GCA 902719685.1 | PDS000069795.1 |
| PDT000676017.2 | SAMEA2081574 | SAMEA2081574 | ERR485520 | GCA 902719755.1 | PDS000069795.1 |
| PDT000676018.2 | SAMEA2077042 | SAMEA2077042 | ERR485516 | GCA 902719735.1 | PDS000069795.1 |
| PDT000676019.2 | SAMEA2081575 | SAMEA2081575 | ERR358108 | GCA 902719715.1 | PDS000069795.1 |
| PDT000676020.2 | SAMEA2077045 | SAMEA2077045 | ERR485521 | GCA 902719815.1 | PDS000069795.1 |
| PDT000676021.2 | SAMEA2077043 | SAMEA2077043 | ERR358103 | GCA 902719695.1 | PDS000069795.1 |
| PDT000676022.2 | SAMEA2077293 | SAMEA2077293 | ERR358110 | GCA 902719785.1 | PDS000069795.1 |
| PDT000676023.2 | SAMEA2077295 | SAMEA2077295 | ERR358113 | GCA 902719665.1 | PDS000069795.1 |
| PDT000676024.2 | SAMEA2077047 | SAMEA2077047 | ERR358109 | GCA 902719835.1 | PDS000069795.1 |
| PDT000676025.2 | SAMEA2077040 | SAMEA2077040 | ERR485513 | GCA 902719775.1 | PDS000069795.1 |
| PDT000676026.2 | SAMEA2077294 | SAMEA2077294 | ERR485527 | GCA 902719765.1 | PDS000069795.1 |
| PDT000676027.2 | SAMEA2081573 | SAMEA2081573 | ERR485517 | GCA 902719725.1 | PDS000069795.1 |

|                |              |              |           |                 |                |
|----------------|--------------|--------------|-----------|-----------------|----------------|
| PDT000676028.2 | SAMEA2081576 | SAMEA2081576 | ERR358111 | GCA 902719845.1 | PDS000069795.1 |
| PDT000676029.2 | SAMEA2081577 | SAMEA2081577 | ERR485529 | GCA 902719705.1 | PDS000069795.1 |
| PDT000676030.2 | SAMEA2077296 | SAMEA2077296 | ERR358115 | GCA 902719805.1 | PDS000069795.1 |
| PDT000676031.2 | SAMEA2081578 | SAMEA2081578 | ERR485532 | GCA 902719745.1 | PDS000069795.1 |
| PDT000676032.2 | SAMEA2077044 | SAMEA2077044 | ERR485519 | GCA 902719675.1 | PDS000069795.1 |
| PDT000676033.2 | SAMEA2077046 | SAMEA2077046 | ERR358107 | GCA 902719795.1 | PDS000069795.1 |
| PDT000676034.2 | SAMEA2077041 | SAMEA2077041 | ERR485515 | GCA 902719825.1 | PDS000069795.1 |
| PDT000676035.2 | SAMEA2077309 | SAMEA2077309 | ERR358134 | GCA 902719915.1 | PDS000069795.1 |
| PDT000676036.2 | SAMEA2077308 | SAMEA2077308 | ERR485548 | GCA 902719885.1 | PDS000069795.1 |
| PDT000676038.2 | SAMEA2077300 | SAMEA2077300 | ERR485536 | GCA 902719855.1 | PDS000069795.1 |
| PDT000676039.2 | SAMEA2081582 | SAMEA2081582 | ERR358129 | GCA 902719865.1 | PDS000069795.1 |
| PDT000676040.2 | SAMEA2077302 | SAMEA2077302 | ERR485539 | GCA 902719905.1 | PDS000069795.1 |
| PDT000676041.2 | SAMEA2081580 | SAMEA2081580 | ERR485538 | GCA 902719945.1 | PDS000069795.1 |
| PDT000676042.2 | SAMEA1969349 | SAMEA1969349 | ERR485550 | GCA 902719925.1 | PDS000069795.1 |
| PDT000676043.2 | SAMEA2081581 | SAMEA2081581 | ERR485541 | GCA 902719895.1 | PDS000069795.1 |
| PDT000676044.2 | SAMEA2077307 | SAMEA2077307 | ERR358131 | GCA 902719875.1 | PDS000069795.1 |
| PDT000676045.2 | SAMEA2081583 | SAMEA2081583 | ERR485547 | GCA 902720045.1 | PDS000069795.1 |
| PDT000676046.2 | SAMEA2077299 | SAMEA2077299 | ERR485534 | GCA 902720025.1 | PDS000069795.1 |
| PDT000676048.2 | SAMEA2077301 | SAMEA2077301 | ERR485537 | GCA 902719995.1 | PDS000069795.1 |
| PDT000676049.2 | SAMEA2081579 | SAMEA2081579 | ERR358120 | GCA 902720015.1 | PDS000069795.1 |
| PDT000676050.2 | SAMEA2077304 | SAMEA2077304 | ERR358127 | GCA 902719965.1 | PDS000069795.1 |
| PDT000676051.2 | SAMEA2077306 | SAMEA2077306 | ERR358130 | GCA 902719975.1 | PDS000069795.1 |
| PDT000676052.2 | SAMEA2077298 | SAMEA2077298 | ERR358118 | GCA 902719985.1 | PDS000069795.1 |
| PDT000676053.2 | SAMEA2077310 | SAMEA2077310 | ERR485551 | GCA 902720035.1 | PDS000069795.1 |
| PDT000676054.2 | SAMEA2077303 | SAMEA2077303 | ERR358125 | GCA 902720005.1 | PDS000069795.1 |
| PDT000681565.2 | SAMEA2077587 | SAMEA2077587 | ERR353179 | GCA 902720295.1 | PDS000069795.1 |
| PDT000681567.2 | SAMEA2081684 | SAMEA2081684 | ERR353177 | GCA 902720285.1 | PDS000069795.1 |
| PDT000681568.2 | SAMEA2077585 | SAMEA2077585 | ERR485585 | GCA 902720255.1 | PDS000069795.1 |
| PDT000681569.2 | SAMEA2077588 | SAMEA2077588 | ERR485590 | GCA 902720355.1 | PDS000069795.1 |
| PDT000681571.2 | SAMEA2081685 | SAMEA2081685 | ERR353180 | GCA 902720365.1 | PDS000069795.1 |
| PDT000681572.2 | SAMEA2077589 | SAMEA2077589 | ERR485591 | GCA 902720265.1 | PDS000069795.1 |
| PDT000681578.2 | SAMEA2077584 | SAMEA2077584 | ERR485584 | GCA 902720395.1 | PDS000069795.1 |
| PDT000681580.2 | SAMEA2077586 | SAMEA2077586 | ERR485587 | GCA 902720445.1 | PDS000069795.1 |
| PDT000681581.2 | SAMEA2081686 | SAMEA2081686 | ERR485592 | GCA 902720415.1 | PDS000069795.1 |
| PDT000681582.2 | SAMEA2077591 | SAMEA2077591 | ERR353185 | GCA 902720475.1 | PDS000069795.1 |
| PDT000681583.2 | SAMEA2077590 | SAMEA2077590 | ERR353184 | GCA 902720465.1 | PDS000069795.1 |
| PDT000681584.2 | SAMEA2081687 | SAMEA2081687 | ERR353186 | GCA 902720455.1 | PDS000069795.1 |
| PDT000681585.2 | SAMEA2077828 | SAMEA2077828 | ERR485616 | GCA 902720485.1 | PDS000069795.1 |
| PDT000681587.2 | SAMEA2077593 | SAMEA2077593 | ERR485597 | GCA 902720525.1 | PDS000069795.1 |
| PDT000681588.2 | SAMEA2081691 | SAMEA2081691 | ERR353194 | GCA 902720495.1 | PDS000069795.1 |
| PDT000681591.2 | SAMEA2077592 | SAMEA2077592 | ERR485596 | GCA 902720555.1 | PDS000069795.1 |
| PDT000681592.2 | SAMEA2077820 | SAMEA2077820 | ERR353195 | GCA 902720535.1 | PDS000069795.1 |
| PDT000681593.2 | SAMEA2081695 | SAMEA2081695 | ERR485615 | GCA 902720505.1 | PDS000069795.1 |
| PDT000681594.2 | SAMEA2081688 | SAMEA2081688 | ERR353189 | GCA 902720635.1 | PDS000069795.1 |
| PDT000681595.2 | SAMEA2077821 | SAMEA2077821 | ERR485605 | GCA 902720585.1 | PDS000069795.1 |
| PDT000681597.2 | SAMEA2081694 | SAMEA2081694 | ERR353203 | GCA 902720625.1 | PDS000069795.1 |
| PDT000681598.2 | SAMEA2077827 | SAMEA2077827 | ERR353205 | GCA 902720615.1 | PDS000069795.1 |
| PDT000681599.2 | SAMEA2077594 | SAMEA2077594 | ERR353190 | GCA 902720675.1 | PDS000069795.1 |
| PDT000681600.2 | SAMEA2077815 | SAMEA2077815 | ERR485600 | GCA 902720575.1 | PDS000069795.1 |
| PDT000681601.2 | SAMEA2077826 | SAMEA2077826 | ERR485613 | GCA 902720645.1 | PDS000069795.1 |
| PDT000681603.2 | SAMEA2077818 | SAMEA2077818 | ERR353192 | GCA 902720665.1 | PDS000069795.1 |
| PDT000681604.2 | SAMEA2077819 | SAMEA2077819 | ERR353193 | GCA 902720595.1 | PDS000069795.1 |
| PDT000681605.2 | SAMEA2078072 | SAMEA2078072 | ERR485634 | GCA 902720845.1 | PDS000069795.1 |
| PDT000681607.2 | SAMEA1968858 | SAMEA1968858 | ERR353219 | GCA 902720685.1 | PDS000069795.1 |
| PDT000681608.2 | SAMEA2081774 | SAMEA2081774 | ERR485636 | GCA 902720755.1 | PDS000069795.1 |
| PDT000681609.2 | SAMEA2081773 | SAMEA2081773 | ERR353224 | GCA 902720745.1 | PDS000069795.1 |
| PDT000681610.2 | SAMEA2081697 | SAMEA2081697 | ERR353212 | GCA 902720825.1 | PDS000069795.1 |
| PDT000681611.2 | SAMEA2077836 | SAMEA2077836 | ERR353220 | GCA 902720835.1 | PDS000069795.1 |
| PDT000681612.2 | SAMEA2081696 | SAMEA2081696 | ERR485618 | GCA 902720815.1 | PDS000069795.1 |
| PDT000681613.2 | SAMEA2077832 | SAMEA2077832 | ERR353213 | GCA 902720805.1 | PDS000069795.1 |
| PDT000681614.2 | SAMEA2077831 | SAMEA2077831 | ERR353211 | GCA 902720725.1 | PDS000069795.1 |
| PDT000681617.2 | SAMEA2081771 | SAMEA2081771 | ERR485627 | GCA 902720785.1 | PDS000069795.1 |
| PDT000681619.2 | SAMEA2077829 | SAMEA2077829 | ERR353208 | GCA 902720705.1 | PDS000069795.1 |
| PDT000681620.2 | SAMEA2081772 | SAMEA2081772 | ERR353221 | GCA 902720765.1 | PDS000069795.1 |
| PDT000681622.2 | SAMEA2077833 | SAMEA2077833 | ERR485623 | GCA 902720865.1 | PDS000069795.1 |
| PDT000681623.2 | SAMEA2078073 | SAMEA2078073 | ERR353226 | GCA 902720875.1 | PDS000069795.1 |
| PDT000681632.2 | SAMEA2081775 | SAMEA2081775 | ERR353230 | GCA 902720915.1 | PDS000069795.1 |
| PDT000681639.2 | SAMEA1971198 | SAMEA1971198 | ERR353228 | GCA 902721035.1 | PDS000069795.1 |

|                |              |              |           |                 |                |
|----------------|--------------|--------------|-----------|-----------------|----------------|
| PDT000681644.2 | SAMEA2078074 | SAMEA2078074 | ERR353229 | GCA 902721005.1 | PDS000069795.1 |
| PDT000681646.2 | SAMEA2081786 | SAMEA2081786 | ERR360210 | GCA 902721195.1 | PDS000069795.1 |
| PDT000681655.2 | SAMEA2078312 | SAMEA2078312 | ERR496769 | GCA 902721245.1 | PDS000069795.1 |
| PDT000681656.2 | SAMEA2081785 | SAMEA2081785 | ERR496767 | GCA 902721215.1 | PDS000069795.1 |
| PDT000681657.2 | SAMEA2078313 | SAMEA2078313 | ERR360211 | GCA 902721265.1 | PDS000069795.1 |
| PDT000681659.2 | SAMEA2078311 | SAMEA2078311 | ERR496768 | GCA 902721255.1 | PDS000069795.1 |
| PDT000681666.2 | SAMEA2078314 | SAMEA2078314 | ERR360214 | GCA 902721285.1 | PDS000069795.1 |
| PDT000681667.2 | SAMEA2078324 | SAMEA2078324 | ERR360229 | GCA 902721295.1 | PDS000069795.1 |
| PDT000681668.2 | SAMEA2078319 | SAMEA2078319 | ERR360221 | GCA 902721325.1 | PDS000069795.1 |
| PDT000681669.2 | SAMEA2078323 | SAMEA2078323 | ERR496787 | GCA 902721335.1 | PDS000069795.1 |
| PDT000681670.2 | SAMEA2081788 | SAMEA2081788 | ERR360216 | GCA 902721305.1 | PDS000069795.1 |
| PDT000681671.2 | SAMEA2078316 | SAMEA2078316 | ERR360217 | GCA 902721375.1 | PDS000069795.1 |
| PDT000681672.2 | SAMEA2081787 | SAMEA2081787 | ERR496773 | GCA 902721355.1 | PDS000069795.1 |
| PDT000681673.2 | SAMEA1964299 | SAMEA1964299 | ERR360212 | GCA 902721405.1 | PDS000069795.1 |
| PDT000681674.2 | SAMEA2081790 | SAMEA2081790 | ERR360222 | GCA 902721465.1 | PDS000069795.1 |
| PDT000681675.2 | SAMEA2081789 | SAMEA2081789 | ERR360219 | GCA 902721425.1 | PDS000069795.1 |
| PDT000681676.2 | SAMEA2081791 | SAMEA2081791 | ERR360225 | GCA 902721315.1 | PDS000069795.1 |
| PDT000681677.2 | SAMEA2078321 | SAMEA2078321 | ERR360224 | GCA 902721395.1 | PDS000069795.1 |
| PDT000681678.2 | SAMEA2078320 | SAMEA2078320 | ERR496783 | GCA 902721415.1 | PDS000069795.1 |
| PDT000681679.2 | SAMEA2081792 | SAMEA2081792 | ERR360228 | GCA 902721345.1 | PDS000069795.1 |
| PDT000681680.2 | SAMEA2081793 | SAMEA2081793 | ERR360231 | GCA 902721475.1 | PDS000069795.1 |
| PDT000681681.2 | SAMEA2078325 | SAMEA2078325 | ERR496790 | GCA 902721385.1 | PDS000069795.1 |
| PDT000681682.2 | SAMEA2078315 | SAMEA2078315 | ERR360215 | GCA 902721435.1 | PDS000069795.1 |
| PDT000681683.2 | SAMEA2078318 | SAMEA2078318 | ERR360220 | GCA 902721445.1 | PDS000069795.1 |
| PDT000681684.2 | SAMEA2078322 | SAMEA2078322 | ERR360226 | GCA 902721455.1 | PDS000069795.1 |
| PDT000681685.2 | SAMEA2078317 | SAMEA2078317 | ERR360218 | GCA 902721365.1 | PDS000069795.1 |
| PDT000681686.2 | SAMEA2078329 | SAMEA2078329 | ERR496796 | GCA 902721545.1 | PDS000069795.1 |
| PDT000681687.2 | SAMEA2078327 | SAMEA2078327 | ERR496793 | GCA 902721485.1 | PDS000069795.1 |
| PDT000681688.2 | SAMEA2080244 | SAMEA2080244 | ERR496809 | GCA 902721555.1 | PDS000069795.1 |
| PDT000681689.2 | SAMEA2078574 | SAMEA2078574 | ERR360242 | GCA 902721535.1 | PDS000069795.1 |
| PDT000681690.2 | SAMEA2080239 | SAMEA2080239 | ERR360234 | GCA 902721605.1 | PDS000069795.1 |
| PDT000681691.2 | SAMEA2078326 | SAMEA2078326 | ERR360232 | GCA 902721595.1 | PDS000069795.1 |
| PDT000681692.2 | SAMEA2078573 | SAMEA2078573 | ERR360241 | GCA 902721625.1 | PDS000069795.1 |
| PDT000681693.2 | SAMEA2080243 | SAMEA2080243 | ERR496806 | GCA 902721515.1 | PDS000069795.1 |
| PDT000681694.2 | SAMEA2078580 | SAMEA2078580 | ERR360251 | GCA 902721615.1 | PDS000069795.1 |
| PDT000681695.2 | SAMEA2078331 | SAMEA2078331 | ERR360239 | GCA 902721565.1 | PDS000069795.1 |
| PDT000681696.2 | SAMEA2078575 | SAMEA2078575 | ERR360244 | GCA 902721575.1 | PDS000069795.1 |
| PDT000681697.2 | SAMEA2078328 | SAMEA2078328 | ERR360235 | GCA 902721495.1 | PDS000069795.1 |
| PDT000681698.2 | SAMEA2080240 | SAMEA2080240 | ERR496797 | GCA 902721525.1 | PDS000069795.1 |
| PDT000681699.2 | SAMEA2080242 | SAMEA2080242 | ERR360243 | GCA 902721585.1 | PDS000069795.1 |
| PDT000681700.2 | SAMEA2078578 | SAMEA2078578 | ERR360248 | GCA 902721505.1 | PDS000069795.1 |
| PDT000681701.2 | SAMEA2078577 | SAMEA2078577 | ERR360247 | GCA 902721635.1 | PDS000069795.1 |
| PDT000681702.2 | SAMEA2078330 | SAMEA2078330 | ERR496798 | GCA 902721645.1 | PDS000069795.1 |
| PDT000681703.2 | SAMEA2080241 | SAMEA2080241 | ERR360240 | GCA 902721655.1 | PDS000069795.1 |
| PDT000681704.2 | SAMEA2078579 | SAMEA2078579 | ERR496810 | GCA 902721675.1 | PDS000069795.1 |
| PDT000681705.2 | SAMEA2078576 | SAMEA2078576 | ERR496805 | GCA 902721665.1 | PDS000069795.1 |
| PDT000681706.2 | SAMEA2080245 | SAMEA2080245 | ERR360252 | GCA 902721685.1 | PDS000069795.1 |
| PDT000681707.2 | SAMEA2078587 | SAMEA2078587 | ERR360263 | GCA 902721805.1 | PDS000069795.1 |
| PDT000681708.2 | SAMEA2078586 | SAMEA2078586 | ERR360262 | GCA 902721755.1 | PDS000069795.1 |
| PDT000681709.2 | SAMEA2080246 | SAMEA2080246 | ERR360255 | GCA 902721845.1 | PDS000069795.1 |
| PDT000681710.2 | SAMEA2078584 | SAMEA2078584 | ERR360259 | GCA 902721735.1 | PDS000069795.1 |
| PDT000681711.2 | SAMEA1965241 | SAMEA1965241 | ERR496824 | GCA 902721815.1 | PDS000069795.1 |
| PDT000681712.2 | SAMEA2080247 | SAMEA2080247 | ERR360258 | GCA 902721725.1 | PDS000069795.1 |
| PDT000681713.2 | SAMEA2078583 | SAMEA2078583 | ERR496817 | GCA 902721825.1 | PDS000069795.1 |
| PDT000681714.2 | SAMEA2078582 | SAMEA2078582 | ERR496816 | GCA 902721765.1 | PDS000069795.1 |
| PDT000681716.2 | SAMEA2078591 | SAMEA2078591 | ERR496829 | GCA 902721695.1 | PDS000069795.1 |
| PDT000681717.2 | SAMEA2078585 | SAMEA2078585 | ERR360260 | GCA 902721745.1 | PDS000069795.1 |
| PDT000681718.2 | SAMEA2080249 | SAMEA2080249 | ERR496827 | GCA 902721785.1 | PDS000069795.1 |
| PDT000681719.2 | SAMEA2078589 | SAMEA2078589 | ERR360266 | GCA 902721705.1 | PDS000069795.1 |
| PDT000681720.2 | SAMEA2078588 | SAMEA2078588 | ERR496825 | GCA 902721835.1 | PDS000069795.1 |
| PDT000681721.2 | SAMEA2080248 | SAMEA2080248 | ERR360261 | GCA 902721715.1 | PDS000069795.1 |
| PDT000681722.2 | SAMEA1973667 | SAMEA1973667 | ERR360253 | GCA 902721855.1 | PDS000069795.1 |
| PDT000681723.2 | SAMEA2078590 | SAMEA2078590 | ERR496828 | GCA 902721795.1 | PDS000069795.1 |
| PDT000681724.2 | SAMEA2078581 | SAMEA2078581 | ERR360254 | GCA 902721865.1 | PDS000069795.1 |
| PDT000681725.2 | SAMEA2080254 | SAMEA2080254 | ERR517314 | GCA 902721955.1 | PDS000069795.1 |
| PDT000681726.2 | SAMEA2076233 | SAMEA2076233 | ERR353243 | GCA 902721885.1 | PDS000069795.1 |
| PDT000681727.2 | SAMEA2076237 | SAMEA2076237 | ERR353250 | GCA 902722045.1 | PDS000069795.1 |
| PDT000681728.2 | SAMEA2076232 | SAMEA2076232 | ERR517310 | GCA 902721915.1 | PDS000069795.1 |



|                |              |              |           |                 |                |
|----------------|--------------|--------------|-----------|-----------------|----------------|
| PDT000681729.2 | SAMEA2080255 | SAMEA2080255 | ERR353248 | GCA 902721945.1 | PDS000069795.1 |
| PDT000681730.2 | SAMEA1965892 | SAMEA1965892 | ERR517313 | GCA 902722035.1 | PDS000069795.1 |
| PDT000681732.2 | SAMEA2080256 | SAMEA2080256 | ERR517320 | GCA 902721895.1 | PDS000069795.1 |
| PDT000681733.2 | SAMEA2076485 | SAMEA2076485 | ERR353253 | GCA 902722015.1 | PDS000069795.1 |
| PDT000681735.2 | SAMEA2078595 | SAMEA2078595 | ERR353238 | GCA 902721935.1 | PDS000069795.1 |
| PDT000681736.2 | SAMEA2076236 | SAMEA2076236 | ERR353249 | GCA 902722025.1 | PDS000069795.1 |
| PDT000681737.2 | SAMEA2076235 | SAMEA2076235 | ERR517316 | GCA 902721985.1 | PDS000069795.1 |
| PDT000681738.2 | SAMEA2080253 | SAMEA2080253 | ERR517311 | GCA 902722005.1 | PDS000069795.1 |
| PDT000681739.2 | SAMEA2076238 | SAMEA2076238 | ERR353252 | GCA 902721875.1 | PDS000069795.1 |
| PDT000681741.2 | SAMEA2080252 | SAMEA2080252 | ERR353239 | GCA 902721905.1 | PDS000069795.1 |
| PDT000681742.2 | SAMEA2076234 | SAMEA2076234 | ERR517315 | GCA 902721995.1 | PDS000069795.1 |
| PDT000681743.2 | SAMEA2078596 | SAMEA2078596 | ERR353240 | GCA 902722055.1 | PDS000069795.1 |
| PDT000681745.2 | SAMEA2080257 | SAMEA2080257 | ERR517323 | GCA 902722095.1 | PDS000069795.1 |
| PDT000681746.2 | SAMEA2076487 | SAMEA2076487 | ERR353256 | GCA 902722075.1 | PDS000069795.1 |
| PDT000681747.2 | SAMEA2076486 | SAMEA2076486 | ERR353255 | GCA 902722085.1 | PDS000069795.1 |
| PDT000681748.2 | SAMEA2076493 | SAMEA2076493 | ERR353265 | GCA 902722145.1 | PDS000069795.1 |
| PDT000681749.2 | SAMEA2080260 | SAMEA2080260 | ERR517332 | GCA 902722205.1 | PDS000069795.1 |
| PDT000681750.2 | SAMEA2076489 | SAMEA2076489 | ERR517328 | GCA 902722115.1 | PDS000069795.1 |
| PDT000681751.2 | SAMEA2080261 | SAMEA2080261 | ERR353266 | GCA 902722155.1 | PDS000069795.1 |
| PDT000681752.2 | SAMEA2080258 | SAMEA2080258 | ERR353257 | GCA 902722225.1 | PDS000069795.1 |
| PDT000681754.2 | SAMEA2080259 | SAMEA2080259 | ERR353260 | GCA 902722215.1 | PDS000069795.1 |
| PDT000681757.2 | SAMEA2076494 | SAMEA2076494 | ERR517336 | GCA 902722165.1 | PDS000069795.1 |
| PDT000681758.2 | SAMEA2080262 | SAMEA2080262 | ERR353269 | GCA 902722285.1 | PDS000069795.1 |
| PDT000681761.2 | SAMEA2076492 | SAMEA2076492 | ERR353264 | GCA 902722275.1 | PDS000069795.1 |
| PDT000681762.2 | SAMEA2076491 | SAMEA2076491 | ERR517331 | GCA 902722105.1 | PDS000069795.1 |
| PDT000681764.2 | SAMEA2076490 | SAMEA2076490 | ERR517330 | GCA 902722125.1 | PDS000069795.1 |
| PDT000681767.2 | SAMEA2076488 | SAMEA2076488 | ERR353258 | GCA 902722255.1 | PDS000069795.1 |
| PDT000681788.2 | SAMEA2080337 | SAMEA2080337 | ERR517374 | GCA 902722575.1 | PDS000069795.1 |
| PDT000681789.2 | SAMEA2076772 | SAMEA2076772 | ERR353300 | GCA 902722545.1 | PDS000069795.1 |
| PDT000681790.2 | SAMEA2080336 | SAMEA2080336 | ERR353302 | GCA 902722585.1 | PDS000069795.1 |
| PDT000681791.2 | SAMEA2076773 | SAMEA2076773 | ERR353301 | GCA 902722565.1 | PDS000069795.1 |
| PDT000681792.2 | SAMEA2076774 | SAMEA2076774 | ERR517372 | GCA 902722535.1 | PDS000069795.1 |
| PDT000681793.2 | SAMEA2076775 | SAMEA2076775 | ERR353304 | GCA 902722555.1 | PDS000069795.1 |
| PDT000681794.2 | SAMEA2076786 | SAMEA2076786 | ERR517390 | GCA 902722785.1 | PDS000069795.1 |
| PDT000681795.2 | SAMEA2076779 | SAMEA2076779 | ERR517379 | GCA 902722615.1 | PDS000069795.1 |
| PDT000681796.2 | SAMEA2076785 | SAMEA2076785 | ERR517388 | GCA 902722655.1 | PDS000069795.1 |
| PDT000681797.2 | SAMEA2076780 | SAMEA2076780 | ERR353312 | GCA 902722595.1 | PDS000069795.1 |
| PDT000681798.2 | SAMEA2076782 | SAMEA2076782 | ERR517384 | GCA 902722765.1 | PDS000069795.1 |
| PDT000681799.2 | SAMEA2080339 | SAMEA2080339 | ERR517380 | GCA 902722705.1 | PDS000069795.1 |
| PDT000681800.2 | SAMEA2080342 | SAMEA2080342 | ERR517389 | GCA 902722645.1 | PDS000069795.1 |
| PDT000681801.2 | SAMEA2080338 | SAMEA2080338 | ERR353308 | GCA 902722745.1 | PDS000069795.1 |
| PDT000681802.2 | SAMEA2076788 | SAMEA2076788 | ERR353324 | GCA 902722625.1 | PDS000069795.1 |
| PDT000681803.2 | SAMEA2076777 | SAMEA2076777 | ERR353307 | GCA 902722635.1 | PDS000069795.1 |
| PDT000681804.2 | SAMEA2076781 | SAMEA2076781 | ERR517382 | GCA 902722665.1 | PDS000069795.1 |
| PDT000681805.2 | SAMEA2076789 | SAMEA2076789 | ERR353325 | GCA 902722755.1 | PDS000069795.1 |
| PDT000681806.2 | SAMEA2080343 | SAMEA2080343 | ERR353323 | GCA 902722715.1 | PDS000069795.1 |
| PDT000681807.2 | SAMEA2076787 | SAMEA2076787 | ERR353322 | GCA 902722735.1 | PDS000069795.1 |
| PDT000681808.2 | SAMEA2076778 | SAMEA2076778 | ERR517378 | GCA 902722685.1 | PDS000069795.1 |
| PDT000681810.2 | SAMEA2080341 | SAMEA2080341 | ERR517386 | GCA 902722725.1 | PDS000069795.1 |
| PDT000681811.2 | SAMEA2076776 | SAMEA2076776 | ERR517375 | GCA 902722695.1 | PDS000069795.1 |
| PDT000681812.2 | SAMEA2076783 | SAMEA2076783 | ERR353316 | GCA 902722675.1 | PDS000069795.1 |
| PDT000681813.2 | SAMEA2080340 | SAMEA2080340 | ERR353314 | GCA 902722605.1 | PDS000069795.1 |
| PDT000681814.2 | SAMEA2080344 | SAMEA2080344 | ERR353326 | GCA 902722835.1 | PDS000069795.1 |
| PDT000681823.2 | SAMEA1968012 | SAMEA1968012 | ERR496848 | GCA 902722915.1 | PDS000069795.1 |
| PDT000681825.2 | SAMEA1967447 | SAMEA1967447 | ERR360289 | GCA 902722895.1 | PDS000069795.1 |
| PDT000681829.2 | SAMEA1966912 | SAMEA1966912 | ERR517396 | GCA 902722985.1 | PDS000069795.1 |
| PDT000681834.2 | SAMEA2077321 | SAMEA2077321 | ERR360305 | GCA 902723015.1 | PDS000069795.1 |
| PDT000681835.2 | SAMEA2077322 | SAMEA2077322 | ERR360308 | GCA 902723075.1 | PDS000069795.1 |
| PDT000681836.2 | SAMEA1969099 | SAMEA1969099 | ERR496859 | GCA 902723035.1 | PDS000069795.1 |
| PDT000681837.2 | SAMEA2077318 | SAMEA2077318 | ERR360300 | GCA 902723185.1 | PDS000069795.1 |
| PDT000681838.2 | SAMEA2080411 | SAMEA2080411 | ERR360294 | GCA 902722995.1 | PDS000069795.1 |
| PDT000681839.2 | SAMEA1963921 | SAMEA1963921 | ERR360306 | GCA 902723125.1 | PDS000069795.1 |
| PDT000681840.2 | SAMEA2080410 | SAMEA2080410 | ERR496851 | GCA 902723065.1 | PDS000069795.1 |
| PDT000681841.2 | SAMEA2080413 | SAMEA2080413 | ERR360298 | GCA 902723165.1 | PDS000069795.1 |
| PDT000681842.2 | SAMEA2077061 | SAMEA2077061 | ERR496855 | GCA 902723095.1 | PDS000069795.1 |
| PDT000681843.2 | SAMEA2077060 | SAMEA2077060 | ERR360293 | GCA 902723025.1 | PDS000069795.1 |
| PDT000681844.2 | SAMEA2077058 | SAMEA2077058 | ERR496850 | GCA 902723175.1 | PDS000069795.1 |
| PDT000681845.2 | SAMEA2080414 | SAMEA2080414 | ERR360301 | GCA 902723085.1 | PDS000069795.1 |

|                |              |              |            |                 |                |
|----------------|--------------|--------------|------------|-----------------|----------------|
| PDT000681846.2 | SAMEA2077059 | SAMEA2077059 | ERR360292  | GCA 902723105.1 | PDS000069795.1 |
| PDT000681847.2 | SAMEA2077320 | SAMEA2077320 | ERR360303  | GCA 902723005.1 | PDS000069795.1 |
| PDT000681848.2 | SAMEA2077319 | SAMEA2077319 | ERR360302  | GCA 902723055.1 | PDS000069795.1 |
| PDT000681849.2 | SAMEA2080412 | SAMEA2080412 | ERR496857  | GCA 902723045.1 | PDS000069795.1 |
| PDT000681850.2 | SAMEA2077062 | SAMEA2077062 | ERR360296  | GCA 902723145.1 | PDS000069795.1 |
| PDT000681851.2 | SAMEA2080416 | SAMEA2080416 | ERR496867  | GCA 902723115.1 | PDS000069795.1 |
| PDT000681852.2 | SAMEA2080415 | SAMEA2080415 | ERR496864  | GCA 902723155.1 | PDS000069795.1 |
| PDT000681853.2 | SAMEA2077323 | SAMEA2077323 | ERR496869  | GCA 902723135.1 | PDS000069795.1 |
| PDT000681854.2 | SAMEA2077328 | SAMEA2077328 | ERR360317  | GCA 902723205.1 | PDS000069795.1 |
| PDT000681855.2 | SAMEA2077332 | SAMEA2077332 | ERR496883  | GCA 902723195.1 | PDS000069795.1 |
| PDT000681856.2 | SAMEA2077325 | SAMEA2077325 | ERR360312  | GCA 902723215.1 | PDS000069795.1 |
| PDT000681857.2 | SAMEA2080423 | SAMEA2080423 | ERR496888  | GCA 902723225.1 | PDS000069795.1 |
| PDT000681858.2 | SAMEA2077327 | SAMEA2077327 | ERR496875  | GCA 902723355.1 | PDS000069795.1 |
| PDT000681859.2 | SAMEA2077329 | SAMEA2077329 | ERR496878  | GCA 902723325.1 | PDS000069795.1 |
| PDT000681860.2 | SAMEA2077326 | SAMEA2077326 | ERR360314  | GCA 902723315.1 | PDS000069795.1 |
| PDT000681861.2 | SAMEA2080421 | SAMEA2080421 | ERR360322  | GCA 902723245.1 | PDS000069795.1 |
| PDT000681862.2 | SAMEA2077334 | SAMEA2077334 | ERR360326  | GCA 902723285.1 | PDS000069795.1 |
| PDT000681863.2 | SAMEA2077331 | SAMEA2077331 | ERR360321  | GCA 902723335.1 | PDS000069795.1 |
| PDT000681864.2 | SAMEA2080419 | SAMEA2080419 | ERR496876  | GCA 902723345.1 | PDS000069795.1 |
| PDT000681865.2 | SAMEA2077324 | SAMEA2077324 | ERR360311  | GCA 902723375.1 | PDS000069795.1 |
| PDT000681866.2 | SAMEA2077333 | SAMEA2077333 | ERR496884  | GCA 902723265.1 | PDS000069795.1 |
| PDT000681867.2 | SAMEA2080417 | SAMEA2080417 | ERR360310  | GCA 902723385.1 | PDS000069795.1 |
| PDT000681868.2 | SAMEA2077330 | SAMEA2077330 | ERR496880  | GCA 902723235.1 | PDS000069795.1 |
| PDT000681869.2 | SAMEA2077335 | SAMEA2077335 | ERR496887  | GCA 902723255.1 | PDS000069795.1 |
| PDT000681870.2 | SAMEA2080418 | SAMEA2080418 | ERR360313  | GCA 902723295.1 | PDS000069795.1 |
| PDT000681871.2 | SAMEA2077336 | SAMEA2077336 | ERR360329  | GCA 902723365.1 | PDS000069795.1 |
| PDT000681872.2 | SAMEA2080422 | SAMEA2080422 | ERR360325  | GCA 902723275.1 | PDS000069795.1 |
| PDT000681873.2 | SAMEA2080420 | SAMEA2080420 | ERR496879  | GCA 902723305.1 | PDS000069795.1 |
| PDT000681874.2 | SAMEA2077338 | SAMEA2077338 | ERR496892  | GCA 902723405.1 | PDS000069795.1 |
| PDT000681879.2 | SAMEA2077337 | SAMEA2077337 | ERR496890  | GCA 902723395.1 | PDS000069795.1 |
| PDT000681883.2 | SAMEA2077339 | SAMEA2077339 | ERR496895  | GCA 902723495.1 | PDS000069795.1 |
| PDT000681887.2 | SAMEA2080425 | SAMEA2080425 | ERR496894  | GCA 902723505.1 | PDS000069795.1 |
| PDT000681888.2 | SAMEA2080424 | SAMEA2080424 | ERR496891  | GCA 902723565.1 | PDS000069795.1 |
| PDT000681893.2 | SAMEA1972425 | SAMEA1972425 | ERR360333  | GCA 902723575.1 | PDS000069795.1 |
| PDT000681894.2 | SAMEA2077611 | SAMEA2077611 | ERR360363  | GCA 902723655.1 | PDS000069795.1 |
| PDT000681895.2 | SAMEA2077612 | SAMEA2077612 | ERR360365  | GCA 902723635.1 | PDS000069795.1 |
| PDT000681896.2 | SAMEA2077609 | SAMEA2077609 | ERR496920  | GCA 902723595.1 | PDS000069795.1 |
| PDT000681897.2 | SAMEA2077610 | SAMEA2077610 | ERR360362  | GCA 902723605.1 | PDS000069795.1 |
| PDT000681898.2 | SAMEA1967946 | SAMEA1967946 | ERR496924  | GCA 902723615.1 | PDS000069795.1 |
| PDT000681899.2 | SAMEA2077613 | SAMEA2077613 | ERR360366  | GCA 902723685.1 | PDS000069795.1 |
| PDT000681901.2 | SAMEA2156895 | SAMEA2156895 | ERR404089  | GCA 902723675.1 | PDS000069795.1 |
| PDT000681902.2 | SAMEA2080434 | SAMEA2080434 | ERR360361  | GCA 902723645.1 | PDS000069795.1 |
| PDT000108650.1 | SAMN03359378 | SAMN03359378 | SRR1814565 | GCA 015617865.1 | PDS000068504.1 |
| PDT000108653.1 | SAMN03359381 | SAMN03359381 | SRR1814568 | GCA 015617625.1 | PDS000068504.1 |
| PDT000108670.1 | SAMN03359398 | SAMN03359398 | SRR1814585 | GCA 015618265.1 | PDS000068504.1 |
| PDT000108676.1 | SAMN03359404 | SAMN03359404 | SRR1814591 | GCA 015618565.1 | PDS000068504.1 |
| PDT000108684.1 | SAMN03359413 | SAMN03359413 | SRR1814600 | GCA 015618205.1 | PDS000068504.1 |
| PDT000108704.1 | SAMN03359433 | SAMN03359433 | SRR1814620 | GCA 015616305.1 | PDS000068504.1 |
| PDT000108705.1 | SAMN03359434 | SAMN03359434 | SRR1814621 | GCA 015616245.1 | PDS000068504.1 |
| PDT000108727.1 | SAMN03359456 | SAMN03359456 | SRR1814643 | GCA 015615105.1 | PDS000068504.1 |
| PDT000108730.1 | SAMN03359459 | SAMN03359459 | SRR1814646 | GCA 015614965.1 | PDS000068504.1 |
| PDT000108787.1 | SAMN03359516 | SAMN03359516 | SRR1814703 | GCA 015614345.1 | PDS000070018.1 |
| PDT000589512.1 | SAMN04505157 | SAMN04505157 | SRR3194896 | GCA 015602005.1 | PDS000069996.1 |
| PDT000589522.1 | SAMN04505167 | SAMN04505167 | SRR3194906 | GCA 015601755.1 | PDS000069996.1 |
| PDT000589526.1 | SAMN04505171 | SAMN04505171 | SRR3194910 | GCA 015601725.1 | PDS000069996.1 |
| PDT000589528.1 | SAMN04505173 | SAMN04505173 | SRR3194912 | GCA 015601645.1 | PDS000069996.1 |
| PDT000589547.1 | SAMN04505192 | SAMN04505192 | SRR3194931 | GCA 015600965.1 | PDS000069996.1 |
| PDT000589555.1 | SAMN04505200 | SAMN04505200 | SRR3194939 | GCA 015601205.1 | PDS000069996.1 |
| PDT000589564.1 | SAMN04505209 | SAMN04505209 | SRR3194948 | GCA 015602105.1 | PDS000069996.1 |
| PDT000108637.1 | SAMN03359365 | SAMN03359365 | SRR1814552 | GCA 015617285.1 | PDS000069928.1 |
| PDT000589494.1 | SAMN04505139 | SAMN04505139 | SRR3194878 | GCA 015602365.1 | PDS000069999.1 |
| PDT000589495.1 | SAMN04505140 | SAMN04505140 | SRR3194879 | GCA 015602305.1 | PDS000069999.1 |
| PDT000589508.1 | SAMN04505153 | SAMN04505153 | SRR3194892 | GCA 015601965.1 | PDS000069999.1 |
| PDT000589510.1 | SAMN04505155 | SAMN04505155 | SRR3194894 | GCA 015602075.1 | PDS000069999.1 |
| PDT000589514.1 | SAMN04505159 | SAMN04505159 | SRR3194898 | GCA 015601905.1 | PDS000069999.1 |
| PDT000589525.1 | SAMN04505170 | SAMN04505170 | SRR3194909 | GCA 015601045.1 | PDS000069999.1 |
| PDT000589563.1 | SAMN04505208 | SAMN04505208 | SRR3194947 | GCA 015601065.1 | PDS000069999.1 |
| PDT000108861.1 | SAMN03359590 | SAMN03359590 | SRR1814777 | GCA 015615185.1 | PDS000070006.1 |

|                |               |               |             |                 |                |
|----------------|---------------|---------------|-------------|-----------------|----------------|
| PDT000884827.1 | SAMN15665318  | SAMN15665318  | SRR12347990 | GCA 015272895.1 | PDS000075463.1 |
| PDT000884828.1 | SAMN15665317  | SAMN15665317  | SRR12347960 | GCA 015272955.1 | PDS000075463.1 |
| PDT000884829.1 | SAMN15665316  | SAMN15665316  | SRR12347961 | GCA 015272965.1 | PDS000075463.1 |
| PDT000884830.1 | SAMN15665315  | SAMN15665315  | SRR12347962 | GCA 015272975.1 | PDS000075463.1 |
| PDT000884831.1 | SAMN15665313  | SAMN15665313  | SRR12347964 | GCA 015273015.1 | PDS000075463.1 |
| PDT000884832.1 | SAMN15665314  | SAMN15665314  | SRR12347963 | GCA 015273035.1 | PDS000075463.1 |
| PDT000884833.1 | SAMN15665312  | SAMN15665312  | SRR12347965 | GCA 015273065.1 | PDS000075463.1 |
| PDT000871114.1 | SAMN15541326  | SAMN15541326  | SRR12233367 | GCA 015541935.1 | PDS000074414.2 |
| PDT000871180.1 | SAMN15541357  | SAMN15541357  | SRR12233433 | GCA 015540845.1 | PDS000074414.2 |
| PDT000871181.1 | SAMN15541356  | SAMN15541356  | SRR12233434 | GCA 015540865.1 | PDS000074414.2 |
| PDT000871192.1 | SAMN15541346  | SAMN15541346  | SRR12233445 | GCA 015541785.1 | PDS000074414.2 |
| PDT000871296.1 | SAMN15541328  | SAMN15541328  | SRR12233552 | GCA 015540665.1 | PDS000074414.2 |
| PDT000871302.1 | SAMN15541327  | SAMN15541327  | SRR12233563 | GCA 015540585.1 | PDS000074414.2 |
| PDT000108602.1 | SAMN03359330  | SAMN03359330  | SRR1814517  | GCA 015618725.1 | PDS000067786.1 |
| PDT000108566.1 | SAMN03359294  | SAMN03359294  | SRR1814481  | GCA 015618935.1 | PDS000067796.1 |
| PDT000108596.1 | SAMN03359324  | SAMN03359324  | SRR1814511  | GCA 015619045.1 | PDS000067796.1 |
| PDT000108606.1 | SAMN03359334  | SAMN03359334  | SRR1814521  | GCA 015618665.1 | PDS000067796.1 |
| PDT000108621.1 | SAMN03359349  | SAMN03359349  | SRR1814536  | GCA 015617325.1 | PDS000067796.1 |
| PDT000444196.1 | SAMEA53014168 | SAMEA53014168 | ERR2506120  | GCA 015605125.1 | PDS000067848.1 |
| PDT000444199.1 | SAMEA53016418 | SAMEA53016418 | ERR2506123  | GCA 015605045.1 | PDS000067848.1 |
| PDT000444205.1 | SAMEA53020918 | SAMEA53020918 | ERR2506129  | GCA 015604925.1 | PDS000067848.1 |
| PDT000444209.1 | SAMEA53023918 | SAMEA53023918 | ERR2506133  | GCA 015606425.1 | PDS000067848.1 |
| PDT000444229.1 | SAMEA53040418 | SAMEA53040418 | ERR2506153  | GCA 015606165.1 | PDS000067848.1 |
| PDT000164633.2 | SAMEA3109327  | SAMEA3109327  | ERR829977   | GCA 900097595.1 | PDS000068204.1 |
| PDT000164700.2 | SAMEA3109320  | SAMEA3109320  | ERR829970   | GCA 900097495.1 | PDS000068204.1 |
| PDT000164876.2 | SAMEA3109337  | SAMEA3109337  | ERR829987   | GCA 900097315.1 | PDS000068204.1 |
| PDT000164891.2 | SAMEA3109328  | SAMEA3109328  | ERR829978   | GCA 900097335.1 | PDS000068204.1 |
| PDT000164893.2 | SAMEA3109325  | SAMEA3109325  | ERR829975   | GCA 900097615.1 | PDS000068204.1 |
| PDT000812750.1 | SAMN10038730  | SAMN10038730  | SRR7839500  | GCA 015570555.1 | PDS000069921.1 |
| PDT000812796.1 | SAMN10038898  | SAMN10038898  | SRR7839635  | GCA 015569475.1 | PDS000069921.1 |
| PDT000812834.1 | SAMN10038784  | SAMN10038784  | SRR7839748  | GCA 015568655.1 | PDS000069921.1 |
| PDT000812865.1 | SAMN10038885  | SAMN10038885  | SRR7839879  | GCA 015568215.1 | PDS000069921.1 |
| PDT000812873.1 | SAMN10038816  | SAMN10038816  | SRR7839888  | GCA 015568035.1 | PDS000069921.1 |
| PDT000871175.1 | SAMN15541362  | SAMN15541362  | SRR12233428 | GCA 015540825.1 | PDS000074417.2 |
| PDT000871176.1 | SAMN15541361  | SAMN15541361  | SRR12233429 | GCA 015540605.1 | PDS000074417.2 |
| PDT000871222.1 | SAMN15541335  | SAMN15541335  | SRR12233475 | GCA 015541425.1 | PDS000074417.2 |
| PDT000871233.1 | SAMN15541334  | SAMN15541334  | SRR12233486 | GCA 015541485.1 | PDS000074417.2 |
| PDT000871255.1 | SAMN15541332  | SAMN15541332  | SRR12233508 | GCA 015541465.1 | PDS000074417.2 |
| PDT000871165.1 | SAMN15541371  | SAMN15541371  | SRR12233418 | GCA 015541105.1 | PDS000074419.2 |
| PDT000871171.1 | SAMN15541321  | SAMN15541321  | SRR12233424 | GCA 015541085.1 | PDS000074419.2 |
| PDT000871182.1 | SAMN15541320  | SAMN15541320  | SRR12233435 | GCA 015540905.1 | PDS000074419.2 |
| PDT000871189.1 | SAMN15541349  | SAMN15541349  | SRR12233442 | GCA 015540805.1 | PDS000074419.2 |
| PDT000871193.1 | SAMN15541319  | SAMN15541319  | SRR12233446 | GCA 015541805.1 | PDS000074419.2 |
| PDT000589500.1 | SAMN04505145  | SAMN04505145  | SRR3194884  | GCA 015602205.1 | PDS000069988.1 |
| PDT000589513.1 | SAMN04505158  | SAMN04505158  | SRR3194897  | GCA 015601925.1 | PDS000069988.1 |
| PDT000589553.1 | SAMN04505198  | SAMN04505198  | SRR3194937  | GCA 015601265.1 | PDS000069988.1 |
| PDT000589554.1 | SAMN04505199  | SAMN04505199  | SRR3194938  | GCA 015601245.1 | PDS000069988.1 |
| PDT000589557.1 | SAMN04505202  | SAMN04505202  | SRR3194941  | GCA 015601145.1 | PDS000069988.1 |
| PDT000618817.1 | SAMN12768987  | SAMN12768987  | SRR10126880 | GCA 015600425.1 | PDS000069873.1 |
| PDT000619013.1 | SAMN12768912  | SAMN12768912  | SRR10127076 | GCA 015596425.1 | PDS000069873.1 |
| PDT000619019.1 | SAMN12768907  | SAMN12768907  | SRR10127082 | GCA 015596325.1 | PDS000069873.1 |
| PDT000619022.1 | SAMN12768904  | SAMN12768904  | SRR10127085 | GCA 015596245.1 | PDS000069873.1 |
| PDT000619026.1 | SAMN12768900  | SAMN12768900  | SRR10127089 | GCA 015596225.1 | PDS000069873.1 |
| PDT000178168.2 | SAMN03893359  | SAMN03893359  | SRR5909229  | GCA 001936755.1 | PDS000068488.1 |
| PDT000178172.2 | SAMN03893354  | SAMN03893354  | SRR5909253  | GCA 001936835.1 | PDS000068488.1 |
| PDT000766302.2 | SAMN14906886  | SAMN14906886  | SRR11787371 | GCA 013338625.1 | PDS000068533.1 |
| PDT000766315.2 | SAMN14906874  | SAMN14906874  | SRR11787384 | GCA 013338875.1 | PDS000068533.1 |
| PDT000813873.1 | SAMN12775958  | SAMN12775958  | SRR10178944 | GCA 009461855.1 | PDS000068533.1 |
| PDT000813922.1 | SAMN12775911  | SAMN12775911  | SRR10178996 | GCA 009462815.1 | PDS000068533.1 |
| PDT000119411.2 | SAMEA1464630  | SAMEA1464630  | ERR118422   | GCA 900040315.1 | PDS000069438.1 |
| PDT000772744.2 | SAMEA4008482  | SAMEA4008482  | ERR1723862  | GCA 903798885.1 | PDS000069438.1 |
| PDT000772796.2 | SAMEA4008538  | SAMEA4008538  | ERR1723915  | GCA 903799425.1 | PDS000069438.1 |
| PDT000772799.2 | SAMEA4008541  | SAMEA4008541  | ERR1723918  | GCA 903799455.1 | PDS000069438.1 |
| PDT000079819.2 | SAMEA1463304  | SAMEA1463304  | ERR302718   | GCA 001212545.1 | PDS000069389.1 |
| PDT000090339.2 | SAMEA1463379  | SAMEA1463379  | ERR144766   | GCA 001349415.1 | PDS000069389.1 |
| PDT000090352.2 | SAMEA1463456  | SAMEA1463456  | ERR144812   | GCA 001349675.1 | PDS000069389.1 |
| PDT000790624.2 | SAMEA4553073  | SAMEA4553073  | ERR1891804  | GCA 903805295.1 | PDS000069389.1 |
| PDT000078904.2 | SAMEA1463318  | SAMEA1463318  | ERR144770   | GCA 001193355.1 | PDS000069365.1 |

|                |                |                |             |                 |                |
|----------------|----------------|----------------|-------------|-----------------|----------------|
| PDT000790675.2 | SAMEA4553117   | SAMEA4553117   | ERR1891848  | GCA 903805725.1 | PDS000069365.1 |
| PDT000790758.2 | SAMEA4553145   | SAMEA4553145   | ERR1891874  | GCA 903805965.1 | PDS000069365.1 |
| PDT000790795.2 | SAMEA4553157   | SAMEA4553157   | ERR1891886  | GCA 903806065.1 | PDS000069365.1 |
| PDT000090350.2 | SAMEA1463454   | SAMEA1463454   | ERR302737   | GCA 001349635.1 | PDS000069376.1 |
| PDT000790693.2 | SAMEA4553123   | SAMEA4553123   | ERR1891854  | GCA 903805785.1 | PDS000069376.1 |
| PDT000790701.2 | SAMEA4553126   | SAMEA4553126   | ERR1891857  | GCA 903805815.1 | PDS000069376.1 |
| PDT000790776.2 | SAMEA4553150   | SAMEA4553150   | ERR1891879  | GCA 903806015.1 | PDS000069376.1 |
| PDT000772522.2 | SAMEA103891396 | SAMEA103891396 | ERR2533627  | GCA 903801405.1 | PDS000069411.1 |
| PDT000772523.2 | SAMEA103891397 | SAMEA103891397 | ERR2533628  | GCA 903801425.1 | PDS000069411.1 |
| PDT000772583.2 | SAMEA103891459 | SAMEA103891459 | ERR2533689  | GCA 903802155.1 | PDS000069411.1 |
| PDT000790254.2 | SAMEA4008707   | SAMEA4008707   | ERR1715409  | GCA 903801495.1 | PDS000069411.1 |
| PDT000790277.2 | SAMEA4008731   | SAMEA4008731   | ERR1715433  | GCA 903803095.1 | PDS000069404.1 |
| PDT000790362.2 | SAMEA4552935   | SAMEA4552935   | ERR3012665  | GCA 903803965.1 | PDS000069404.1 |
| PDT000790369.2 | SAMEA4552944   | SAMEA4552944   | ERR3012672  | GCA 903804045.1 | PDS000069404.1 |
| PDT000790881.2 | SAMEA4553181   | SAMEA4553181   | ERR1891909  | GCA 903806295.1 | PDS000069404.1 |
| PDT000790633.2 | SAMEA4553082   | SAMEA4553082   | ERR1891813  | GCA 903805385.1 | PDS000069375.1 |
| PDT000790663.2 | SAMEA4553113   | SAMEA4553113   | ERR1891844  | GCA 903805695.1 | PDS000069375.1 |
| PDT000790705.2 | SAMEA4553127   | SAMEA4553127   | ERR1891858  | GCA 903805825.1 | PDS000069375.1 |
| PDT000790762.2 | SAMEA4553146   | SAMEA4553146   | ERR1891875  | GCA 903805975.1 | PDS000069375.1 |
| PDT000790404.2 | SAMEA4552970   | SAMEA4552970   | ERR3012696  | GCA 903804275.1 | PDS000069396.1 |
| PDT000790570.2 | SAMEA4553017   | SAMEA4553017   | ERR3012743  | GCA 903804745.1 | PDS000069396.1 |
| PDT000790574.2 | SAMEA4553021   | SAMEA4553021   | ERR3012747  | GCA 903804795.1 | PDS000069396.1 |
| PDT000790575.2 | SAMEA4553022   | SAMEA4553022   | ERR3012748  | GCA 903804785.1 | PDS000069396.1 |
| PDT000813752.1 | SAMN12776079   | SAMN12776079   | SRR10179154 | GCA 009459435.1 | PDS000067775.1 |
| PDT000108574.1 | SAMN03359302   | SAMN03359302   | SRR1814489  | GCA 015619195.1 | PDS000067792.1 |
| PDT000108595.1 | SAMN03359323   | SAMN03359323   | SRR1814510  | GCA 015619565.1 | PDS000067792.1 |
| PDT000108610.1 | SAMN03359338   | SAMN03359338   | SRR1814525  | GCA 015618485.1 | PDS000067784.1 |
| PDT000108611.1 | SAMN03359339   | SAMN03359339   | SRR1814526  | GCA 015618525.1 | PDS000067784.1 |
| PDT000108612.1 | SAMN03359340   | SAMN03359340   | SRR1814527  | GCA 015618465.1 | PDS000067784.1 |
| PDT000108561.1 | SAMN03359289   | SAMN03359289   | SRR1814476  | GCA 015619005.1 | PDS000067797.1 |
| PDT000108562.1 | SAMN03359290   | SAMN03359290   | SRR1814477  | GCA 015619285.1 | PDS000067797.1 |
| PDT000108563.1 | SAMN03359291   | SAMN03359291   | SRR1814478  | GCA 015619245.1 | PDS000067797.1 |
| PDT000116266.2 | SAMEA1464411   | SAMEA1464411   | ERR118410   | GCA 900040305.1 | PDS000067805.1 |
| PDT000117439.2 | SAMEA1317564   | SAMEA1317564   | ERR111123   | GCA 900031665.1 | PDS000067805.1 |
| PDT000118134.2 | SAMEA1464312   | SAMEA1464312   | ERR118409   | GCA 900017595.1 | PDS000067805.1 |
| PDT000108631.1 | SAMN03359359   | SAMN03359359   | SRR1814546  | GCA 015617665.1 | PDS000067779.1 |
| PDT000108644.1 | SAMN03359372   | SAMN03359372   | SRR1814559  | GCA 015617225.1 | PDS000067779.1 |
| PDT000108645.1 | SAMN03359373   | SAMN03359373   | SRR1814560  | GCA 015617825.1 | PDS000067779.1 |
| PDT000811519.1 | SAMEA4387400   | SAMEA4387400   | ERR1789089  | GCA 015580195.1 | PDS000067892.1 |
| PDT000811580.1 | SAMEA4387179   | SAMEA4387179   | ERR1789150  | GCA 015578595.1 | PDS000067892.1 |
| PDT000811776.1 | SAMEA4387278   | SAMEA4387278   | ERR1789346  | GCA 015575435.1 | PDS000067892.1 |
| PDT000423399.1 | SAMEA4469692   | SAMEA4469692   | ERR1795917  | GCA 015608575.1 | PDS000067881.1 |
| PDT000423400.1 | SAMEA4469693   | SAMEA4469693   | ERR1795918  | GCA 015608505.1 | PDS000067881.1 |
| PDT000423401.1 | SAMEA4469694   | SAMEA4469694   | ERR1795919  | GCA 015608375.1 | PDS000067881.1 |
| PDT000811484.1 | SAMEA4387391   | SAMEA4387391   | ERR1789054  | GCA 015579455.1 | PDS000067866.1 |
| PDT000811534.1 | SAMEA4387156   | SAMEA4387156   | ERR1789104  | GCA 015578995.1 | PDS000067866.1 |
| PDT000811641.1 | SAMEA4387684   | SAMEA4387684   | ERR1789211  | GCA 015577015.1 | PDS000067861.1 |
| PDT000811656.1 | SAMEA4387217   | SAMEA4387217   | ERR1789226  | GCA 015576435.1 | PDS000067861.1 |
| PDT000811547.1 | SAMEA4387407   | SAMEA4387407   | ERR1789117  | GCA 015579895.1 | PDS000067891.1 |
| PDT000811602.1 | SAMEA4387190   | SAMEA4387190   | ERR1789172  | GCA 015578215.1 | PDS000067891.1 |
| PDT000811872.1 | SAMEA4387327   | SAMEA4387327   | ERR1795562  | GCA 015572365.1 | PDS000067891.1 |
| PDT000811573.1 | SAMEA4387531   | SAMEA4387531   | ERR1789143  | GCA 015577515.1 | PDS000067888.1 |
| PDT000811581.1 | SAMEA4387532   | SAMEA4387532   | ERR1789151  | GCA 015578385.1 | PDS000067888.1 |
| PDT000811597.1 | SAMEA4387534   | SAMEA4387534   | ERR1789167  | GCA 015578615.1 | PDS000067888.1 |
| PDT000115653.2 | SAMEA1317571   | SAMEA1317571   | ERR107970   | GCA 900037805.1 | PDS000068327.1 |
| PDT000116038.2 | SAMEA1464383   | SAMEA1464383   | ERR118510   | GCA 900042315.1 | PDS000068327.1 |
| PDT000118335.2 | SAMEA1464555   | SAMEA1464555   | ERR118420   | GCA 900044545.1 | PDS000068327.1 |
| PDT000050125.2 | SAMN03198884   | SAMN03198884   | SRR1786256  | GCA 000877845.1 | PDS000068743.1 |
| PDT000202946.2 | SAMN06624122   | SAMN06624122   | SRR5364301  | GCA 002088085.1 | PDS000068743.1 |
| PDT000766272.2 | SAMN14906915   | SAMN14906915   | SRR11787387 | GCA 013338035.1 | PDS000068773.1 |
| PDT000813694.1 | SAMN12776139   | SAMN12776139   | SRR10179304 | GCA 009458275.1 | PDS000068773.1 |
| PDT000813778.1 | SAMN12776055   | SAMN12776055   | SRR10179180 | GCA 009459945.1 | PDS000068773.1 |
| PDT000078960.2 | SAMEA1324640   | SAMEA1324640   | ERR134755   | GCA 001194505.1 | PDS000068793.1 |
| PDT000079708.2 | SAMEA1710095   | SAMEA1710095   | ERR249327   | GCA 001210205.1 | PDS000068793.1 |
| PDT000090471.2 | SAMEA1324652   | SAMEA1324652   | ERR134732   | GCA 001352515.1 | PDS000068793.1 |
| PDT000079573.2 | SAMEA1324642   | SAMEA1324642   | ERR134718   | GCA 001207395.1 | PDS000068782.1 |
| PDT000090482.2 | SAMEA1324692   | SAMEA1324692   | ERR134748   | GCA 001352735.1 | PDS000068782.1 |
| PDT000090485.2 | SAMEA1324698   | SAMEA1324698   | ERR134719   | GCA 001352795.1 | PDS000068782.1 |

|                |                |                |            |                 |                |
|----------------|----------------|----------------|------------|-----------------|----------------|
| PDT000772492.2 | SAMEA103891366 | SAMEA103891366 | ERR2533597 | GCA 903800835.1 | PDS000068742.1 |
| PDT000804965.2 | SAMEA6125860   | SAMEA6125860   | ERR3623792 | GCA 903987525.1 | PDS000068758.1 |
| PDT000804970.2 | SAMEA6125857   | SAMEA6125857   | ERR3623793 | GCA 903987505.1 | PDS000068758.1 |
| PDT000804983.2 | SAMEA6125868   | SAMEA6125868   | ERR3623801 | GCA 903987685.1 | PDS000068758.1 |
| PDT000079709.2 | SAMEA1324662   | SAMEA1324662   | ERR134800  | GCA 001210225.1 | PDS000069329.1 |
| PDT000791064.2 | SAMEA70080418  | SAMEA70080418  | ERR2506362 | GCA 903808045.1 | PDS000069329.1 |
| PDT000791353.2 | SAMEA70305418  | SAMEA70305418  | ERR2525353 | GCA 903810885.1 | PDS000069329.1 |
| PDT000078962.2 | SAMEA1466475   | SAMEA1466475   | ERR137961  | GCA 001194545.1 | PDS000069286.1 |
| PDT000079377.2 | SAMEA1466466   | SAMEA1466466   | ERR137965  | GCA 001203255.1 | PDS000069286.1 |
| PDT000090532.2 | SAMEA1466488   | SAMEA1466488   | ERR137966  | GCA 001353735.1 | PDS000069286.1 |
| PDT000078944.2 | SAMEA1324562   | SAMEA1324562   | ERR134727  | GCA 001194165.1 | PDS000069289.1 |
| PDT000079418.2 | SAMEA1324608   | SAMEA1324608   | ERR134757  | GCA 001204115.1 | PDS000069289.1 |
| PDT000090499.2 | SAMEA1324732   | SAMEA1324732   | ERR134725  | GCA 001353075.1 | PDS000069289.1 |
| PDT000078874.2 | SAMEA1324536   | SAMEA1324536   | ERR134741  | GCA 001192715.1 | PDS000069288.1 |
| PDT000078949.2 | SAMEA1324727   | SAMEA1324727   | ERR134743  | GCA 001194265.1 | PDS000069288.1 |
| PDT000079405.2 | SAMEA1324678   | SAMEA1324678   | ERR134758  | GCA 001203835.1 | PDS000069288.1 |
| PDT000078994.2 | SAMEA1463416   | SAMEA1463416   | ERR302702  | GCA 001195205.1 | PDS000069280.1 |
| PDT000079632.2 | SAMEA1463390   | SAMEA1463390   | ERR302732  | GCA 001208665.1 | PDS000069280.1 |
| PDT000079638.2 | SAMEA1708830   | SAMEA1708830   | ERR237624  | GCA 001208785.1 | PDS000069280.1 |
| PDT000772352.2 | SAMEA103891225 | SAMEA103891225 | ERR2533456 | GCA 903811525.1 | PDS000069325.1 |
| PDT000791092.2 | SAMEA70102918  | SAMEA70102918  | ERR2506390 | GCA 903808345.1 | PDS000069325.1 |
| PDT000791099.2 | SAMEA70108168  | SAMEA70108168  | ERR2506397 | GCA 903808415.1 | PDS000069325.1 |
| PDT000791359.2 | SAMEA70309918  | SAMEA70309918  | ERR2525359 | GCA 903810945.1 | PDS000069298.1 |
| PDT000791367.2 | SAMEA70315918  | SAMEA70315918  | ERR2525367 | GCA 903811025.1 | PDS000069298.1 |
| PDT000791368.2 | SAMEA70316668  | SAMEA70316668  | ERR2525368 | GCA 903811035.1 | PDS000069298.1 |
| PDT000791150.2 | SAMEA70147168  | SAMEA70147168  | ERR2506448 | GCA 903808925.1 | PDS000069319.1 |
| PDT000791153.2 | SAMEA70149418  | SAMEA70149418  | ERR2506451 | GCA 903808955.1 | PDS000069319.1 |
| PDT000791155.2 | SAMEA70150918  | SAMEA70150918  | ERR2506453 | GCA 903808975.1 | PDS000069319.1 |
| PDT000791334.2 | SAMEA70291168  | SAMEA70291168  | ERR2525334 | GCA 903810695.1 | PDS000069299.1 |
| PDT000791338.2 | SAMEA70294168  | SAMEA70294168  | ERR2525338 | GCA 903810745.1 | PDS000069299.1 |
| PDT000791341.2 | SAMEA70296418  | SAMEA70296418  | ERR2525341 | GCA 903810765.1 | PDS000069299.1 |
| PDT000812775.1 | SAMN10038805   | SAMN10038805   | SRR7839597 | GCA 015570225.1 | PDS000069930.1 |
| PDT000812877.1 | SAMN10038814   | SAMN10038814   | SRR7839893 | GCA 015567785.1 | PDS000069930.1 |
| PDT000812920.1 | SAMN10038766   | SAMN10038766   | SRR7839993 | GCA 015567055.1 | PDS000069930.1 |
| PDT000812840.1 | SAMN10038979   | SAMN10038979   | SRR7839756 | GCA 015568525.1 | PDS000069909.1 |
| PDT000812925.1 | SAMN10038980   | SAMN10038980   | SRR7840006 | GCA 015567015.1 | PDS000069909.1 |
| PDT000812927.1 | SAMN10038978   | SAMN10038978   | SRR7840008 | GCA 015567135.1 | PDS000069909.1 |
| PDT000812826.1 | SAMN10038831   | SAMN10038831   | SRR7839726 | GCA 015568955.1 | PDS000069925.1 |
| PDT000812902.1 | SAMN10038846   | SAMN10038846   | SRR7839953 | GCA 015567735.1 | PDS000069925.1 |
| PDT000812952.1 | SAMN10038853   | SAMN10038853   | SRR7840095 | GCA 015566475.1 | PDS000069925.1 |
| PDT000812859.1 | SAMN10038745   | SAMN10038745   | SRR7839853 | GCA 015569295.1 | PDS000069944.1 |
| PDT000812918.1 | SAMN10038764   | SAMN10038764   | SRR7839991 | GCA 015566855.1 | PDS000069944.1 |
| PDT000812932.1 | SAMN10038863   | SAMN10038863   | SRR7840014 | GCA 015566995.1 | PDS000069944.1 |
| PDT000812757.1 | SAMN10038977   | SAMN10038977   | SRR7839543 | GCA 015570615.1 | PDS000069910.1 |
| PDT000812818.1 | SAMN10038972   | SAMN10038972   | SRR7839716 | GCA 015569015.1 | PDS000069910.1 |
| PDT000812821.1 | SAMN10038971   | SAMN10038971   | SRR7839721 | GCA 015569435.1 | PDS000069910.1 |
| PDT000812804.1 | SAMN10038826   | SAMN10038826   | SRR7839667 | GCA 015568835.1 | PDS000069926.1 |
| PDT000812889.1 | SAMN10038737   | SAMN10038737   | SRR7839933 | GCA 015567955.1 | PDS000069926.1 |
| PDT000812957.1 | SAMN10038822   | SAMN10038822   | SRR7840103 | GCA 015566375.1 | PDS000069926.1 |
| PDT000115870.2 | SAMEA1464302   | SAMEA1464302   | ERR118338  | GCA 900020365.1 | PDS000069978.1 |
| PDT000118324.2 | SAMEA1464425   | SAMEA1464425   | ERR118437  | GCA 900039115.1 | PDS000069978.1 |
| PDT000118626.2 | SAMEA1317484   | SAMEA1317484   | ERR107855  | GCA 900035815.1 | PDS000069978.1 |
| PDT000112271.2 | SAMEA1317509   | SAMEA1317509   | ERR107845  | GCA 900048445.1 | PDS000069923.1 |
| PDT000118555.2 | SAMEA1464428   | SAMEA1464428   | ERR129282  | GCA 900035925.1 | PDS000069923.1 |
| PDT000119269.2 | SAMEA1317416   | SAMEA1317416   | ERR107843  | GCA 900022615.1 | PDS000069923.1 |
| PDT000108651.1 | SAMN03359379   | SAMN03359379   | SRR1814566 | GCA 015617705.1 | PDS000067776.1 |
| PDT000108675.1 | SAMN03359403   | SAMN03359403   | SRR1814590 | GCA 015617965.1 | PDS000067776.1 |
| PDT000108636.1 | SAMN03359364   | SAMN03359364   | SRR1814551 | GCA 015617345.1 | PDS000067778.1 |
| PDT000108665.1 | SAMN03359393   | SAMN03359393   | SRR1814580 | GCA 015618285.1 | PDS000067778.1 |
| PDT000108681.1 | SAMN03359410   | SAMN03359410   | SRR1814597 | GCA 015618125.1 | PDS000067774.1 |
| PDT000108792.1 | SAMN03359521   | SAMN03359521   | SRR1814708 | GCA 015616185.1 | PDS000067774.1 |
| PDT000108635.1 | SAMN03359363   | SAMN03359363   | SRR1814550 | GCA 015618365.1 | PDS000067781.1 |
| PDT000108639.1 | SAMN03359367   | SAMN03359367   | SRR1814554 | GCA 015617245.1 | PDS000067781.1 |
| PDT000108638.1 | SAMN03359366   | SAMN03359366   | SRR1814553 | GCA 015617265.1 | PDS000067780.1 |
| PDT000108642.1 | SAMN03359370   | SAMN03359370   | SRR1814557 | GCA 015617765.1 | PDS000067780.1 |
| PDT000080085.2 | SAMEA1030240   | SAMEA1030240   | ERR044601  | GCA 001224365.1 | PDS000067772.1 |
| PDT000118151.2 | SAMEA1464317   | SAMEA1464317   | ERR118369  | GCA 900037825.1 | PDS000067772.1 |
| PDT000116533.2 | SAMEA1464211   | SAMEA1464211   | ERR118590  | GCA 900044895.1 | PDS000067783.1 |

|                |                |                |             |                 |                |
|----------------|----------------|----------------|-------------|-----------------|----------------|
| PDT000118148.2 | SAMEA1464676   | SAMEA1464676   | ERR129311   | GCA 900048575.1 | PDS000067783.1 |
| PDT000811744.1 | SAMEA4387262   | SAMEA4387262   | ERR1789314  | GCA 015575215.1 | PDS000067899.1 |
| PDT000811852.1 | SAMEA4387316   | SAMEA4387316   | ERR1795540  | GCA 015572715.1 | PDS000067899.1 |
| PDT000811526.1 | SAMEA4387152   | SAMEA4387152   | ERR1789096  | GCA 015579155.1 | PDS000067901.1 |
| PDT000811839.1 | SAMEA4387634   | SAMEA4387634   | ERR1795527  | GCA 015572975.1 | PDS000067901.1 |
| PDT000811385.1 | SAMEA4387079   | SAMEA4387079   | ERR1788955  | GCA 015582095.1 | PDS000067903.1 |
| PDT000811415.1 | SAMEA4387095   | SAMEA4387095   | ERR1788985  | GCA 015581035.1 | PDS000067903.1 |
| PDT000117747.2 | SAMEA1469644   | SAMEA1469644   | ERR158783   | GCA 900048355.1 | PDS000067905.1 |
| PDT000117814.2 | SAMEA1317483   | SAMEA1317483   | ERR111088   | GCA 900057315.1 | PDS000067905.1 |
| PDT000811395.1 | SAMEA4387084   | SAMEA4387084   | ERR1788965  | GCA 015581855.1 | PDS000067904.1 |
| PDT000811403.1 | SAMEA4387088   | SAMEA4387088   | ERR1788973  | GCA 015581695.1 | PDS000067904.1 |
| PDT000811770.1 | SAMEA4387275   | SAMEA4387275   | ERR1789340  | GCA 015574915.1 | PDS000067897.1 |
| PDT000811798.1 | SAMEA4387289   | SAMEA4387289   | ERR1789368  | GCA 015574075.1 | PDS000067897.1 |
| PDT000088245.1 | SAMEA2493782   | SAMEA2493782   | ERR493458   | GCA 015619605.1 | PDS000068045.1 |
| PDT000088255.1 | SAMEA2493804   | SAMEA2493804   | ERR493480   | GCA 015619485.1 | PDS000068045.1 |
| PDT000184832.1 | SAMEA24747418  | SAMEA24747418  | ERR1753490  | GCA 015610385.1 | PDS000068054.1 |
| PDT000184833.1 | SAMEA24748168  | SAMEA24748168  | ERR1753491  | GCA 015610605.1 | PDS000068054.1 |
| PDT000184837.1 | SAMEA24751168  | SAMEA24751168  | ERR1753495  | GCA 015610685.1 | PDS000068052.1 |
| PDT000184838.1 | SAMEA24751918  | SAMEA24751918  | ERR1753496  | GCA 015610665.1 | PDS000068052.1 |
| PDT000184846.1 | SAMEA24757918  | SAMEA24757918  | ERR1753504  | GCA 015610625.1 | PDS000068047.1 |
| PDT000184847.1 | SAMEA24758668  | SAMEA24758668  | ERR1753505  | GCA 015610165.1 | PDS000068047.1 |
| PDT000184834.1 | SAMEA24748918  | SAMEA24748918  | ERR1753492  | GCA 015610245.1 | PDS000068053.1 |
| PDT000184835.1 | SAMEA24749668  | SAMEA24749668  | ERR1753493  | GCA 015610405.1 | PDS000068053.1 |
| PDT000117125.2 | SAMEA1464570   | SAMEA1464570   | ERR118534   | GCA 900045095.1 | PDS000068049.1 |
| PDT000117543.2 | SAMEA1469713   | SAMEA1469713   | ERR158630   | GCA 900037885.1 | PDS000068049.1 |
| PDT000115818.2 | SAMEA1317463   | SAMEA1317463   | ERR107906   | GCA 900038375.1 | PDS000068271.1 |
| PDT000116897.2 | SAMEA1317477   | SAMEA1317477   | ERR107908   | GCA 900035845.1 | PDS000068271.1 |
| PDT000115759.2 | SAMEA1464588   | SAMEA1464588   | ERR118455   | GCA 900040355.1 | PDS000068282.1 |
| PDT000116638.2 | SAMEA1464707   | SAMEA1464707   | ERR118365   | GCA 900020485.1 | PDS000068282.1 |
| PDT000813847.1 | SAMN12775986   | SAMN12775986   | SRR10179257 | GCA 009461325.1 | PDS000068422.1 |
| PDT000813980.1 | SAMN12775854   | SAMN12775854   | SRR10179185 | GCA 009463985.1 | PDS000068422.1 |
| PDT000813911.1 | SAMN12775922   | SAMN12775922   | SRR10178983 | GCA 009462575.1 | PDS000068435.1 |
| PDT000813979.1 | SAMN12775853   | SAMN12775853   | SRR10179082 | GCA 009463965.1 | PDS000068435.1 |
| PDT000111957.2 | SAMEA1464305   | SAMEA1464305   | ERR129302   | GCA 900044495.1 | PDS000068438.1 |
| PDT000117639.2 | SAMEA1317417   | SAMEA1317417   | ERR107886   | GCA 900037705.1 | PDS000068438.1 |
| PDT000790295.2 | SAMEA4008749   | SAMEA4008749   | ERR1715450  | GCA 903803285.1 | PDS000068569.1 |
| PDT000476166.2 | SAMN10882808   | SAMN10882808   | SRR8543812  | GCA 004208505.1 | PDS000068565.1 |
| PDT000476167.2 | SAMN10882809   | SAMN10882809   | SRR8543813  | GCA 004208495.1 | PDS000068565.1 |
| PDT000371190.2 | SAMD00083439   | SAMD00083439   | DRR107079   | GCA 003417105.1 | PDS000068718.1 |
| PDT000371298.2 | SAMD00083535   | SAMD00083535   | DRR107175   | GCA 003420265.1 | PDS000068718.1 |
| PDT000371214.2 | SAMD00083459   | SAMD00083459   | DRR107099   | GCA 003417665.1 | PDS000068712.1 |
| PDT000371330.2 | SAMD00083564   | SAMD00083564   | DRR107204   | GCA 003420945.1 | PDS000068712.1 |
| PDT000371205.2 | SAMD00083454   | SAMD00083454   | DRR107094   | GCA 003417405.1 | PDS000068713.1 |
| PDT000371325.2 | SAMD00083559   | SAMD00083559   | DRR107199   | GCA 003420845.1 | PDS000068713.1 |
| PDT000371201.2 | SAMD00083450   | SAMD00083450   | DRR107090   | GCA 003417325.1 | PDS000068716.1 |
| PDT000371300.2 | SAMD00083537   | SAMD00083537   | DRR107177   | GCA 003420305.1 | PDS000068716.1 |
| PDT000371204.2 | SAMD00083453   | SAMD00083453   | DRR107093   | GCA 003417385.1 | PDS000068714.1 |
| PDT000371347.2 | SAMD00083581   | SAMD00083581   | DRR107221   | GCA 003421285.1 | PDS000068714.1 |
| PDT000371193.2 | SAMD00083442   | SAMD00083442   | DRR107082   | GCA 003417165.1 | PDS000068717.1 |
| PDT000371326.2 | SAMD00083560   | SAMD00083560   | DRR107200   | GCA 003420865.1 | PDS000068717.1 |
| PDT000766333.2 | SAMN14906852   | SAMN14906852   | SRR11787455 | GCA 013339245.1 | PDS000068845.1 |
| PDT000813722.1 | SAMN12776111   | SAMN12776111   | SRR10179119 | GCA 009458825.1 | PDS000068845.1 |
| PDT000313596.2 | SAMN07291554   | SAMN07291554   | SRR6985700  | GCA 003073715.1 | PDS000068843.1 |
| PDT000772488.2 | SAMEA103891362 | SAMEA103891362 | ERR2533593  | GCA 903800785.1 | PDS000068843.1 |
| PDT000079076.2 | SAMEA1324618   | SAMEA1324618   | ERR134648   | GCA 001196895.1 | PDS000068837.1 |
| PDT000090466.2 | SAMEA1324633   | SAMEA1324633   | ERR134647   | GCA 001352415.1 | PDS000068837.1 |
| PDT000090465.2 | SAMEA1324628   | SAMEA1324628   | ERR134676   | GCA 001352395.1 | PDS000068848.1 |
| PDT000090500.2 | SAMEA1324734   | SAMEA1324734   | ERR134668   | GCA 001353095.1 | PDS000068848.1 |
| PDT000766290.2 | SAMN14906899   | SAMN14906899   | SRR11787421 | GCA 013338385.1 | PDS000068999.1 |
| PDT000813640.1 | SAMN12776194   | SAMN12776194   | SRR10179068 | GCA 009457175.1 | PDS000068999.1 |
| PDT000813631.1 | SAMN12776200   | SAMN12776200   | SRR10179062 | GCA 009457005.1 | PDS000069011.1 |
| PDT000813959.1 | SAMN12775874   | SAMN12775874   | SRR10179162 | GCA 009463565.1 | PDS000069011.1 |
| PDT000084524.2 | SAMN03658599   | SAMN03658599   | SRR2107103  | GCA 001297445.1 | PDS000069005.1 |
| PDT000084526.2 | SAMN03658598   | SAMN03658598   | SRR2107102  | GCA 001297535.1 | PDS000069005.1 |
| PDT000079742.2 | SAMEA1708818   | SAMEA1708818   | ERR237631   | GCA 001210925.1 | PDS000068994.1 |
| PDT000090342.2 | SAMEA1463419   | SAMEA1463419   | ERR302727   | GCA 001349475.1 | PDS000068994.1 |
| PDT000083719.2 | SAMEA2384816   | SAMEA2384816   | ERR554738   | GCA 001288205.1 | PDS000069149.1 |
| PDT000083760.2 | SAMEA2384832   | SAMEA2384832   | ERR554754   | GCA 001289045.1 | PDS000069149.1 |

|                |                |                |             |                 |                |
|----------------|----------------|----------------|-------------|-----------------|----------------|
| PDT000171063.2 | SAMEA3449041   | SAMEA3449041   | ERR1069894  | GCA 900125205.1 | PDS000069155.1 |
| PDT000171235.2 | SAMEA3449036   | SAMEA3449036   | ERR1069889  | GCA 900127755.1 | PDS000069155.1 |
| PDT000171067.2 | SAMEA3448987   | SAMEA3448987   | ERR1069840  | GCA 900124715.1 | PDS000069154.1 |
| PDT000171137.2 | SAMEA3448961   | SAMEA3448961   | ERR1070048  | GCA 900128105.1 | PDS000069154.1 |
| PDT000170428.2 | SAMEA3448929   | SAMEA3448929   | ERR1070016  | GCA 900126125.1 | PDS000069156.1 |
| PDT000170974.2 | SAMEA3449019   | SAMEA3449019   | ERR1069872  | GCA 900125005.1 | PDS000069156.1 |
| PDT000170846.2 | SAMEA3448885   | SAMEA3448885   | ERR1069972  | GCA 900125965.1 | PDS000069157.1 |
| PDT000171207.2 | SAMEA3448863   | SAMEA3448863   | ERR1069940  | GCA 900127855.1 | PDS000069157.1 |
| PDT000170467.2 | SAMEA3448915   | SAMEA3448915   | ERR1070002  | GCA 900126005.1 | PDS000069158.1 |
| PDT000170844.2 | SAMEA3448935   | SAMEA3448935   | ERR1070022  | GCA 900126185.1 | PDS000069158.1 |
| PDT000171108.2 | SAMEA3448931   | SAMEA3448931   | ERR1070018  | GCA 900126145.1 | PDS000069153.1 |
| PDT000171112.2 | SAMEA3448908   | SAMEA3448908   | ERR1069995  | GCA 900125925.1 | PDS000069153.1 |
| PDT000079052.2 | SAMEA1324680   | SAMEA1324680   | ERR134666   | GCA 001196415.1 | PDS000069275.1 |
| PDT000072588.2 | SAMEA103891464 | SAMEA103891464 | ERR2533694  | GCA 903802235.1 | PDS000069275.1 |
| PDT000078988.2 | SAMEA1466484   | SAMEA1466484   | ERR137910   | GCA 001195085.1 | PDS000069282.1 |
| PDT000079714.2 | SAMEA1466496   | SAMEA1466496   | ERR302747   | GCA 001210325.1 | PDS000069282.1 |
| PDT000079135.2 | SAMEA1324749   | SAMEA1324749   | ERR134690   | GCA 001198155.1 | PDS000069270.1 |
| PDT000090439.2 | SAMEA1324557   | SAMEA1324557   | ERR134700   | GCA 001351875.1 | PDS000069270.1 |
| PDT000078957.2 | SAMEA1324620   | SAMEA1324620   | ERR134765   | GCA 001194445.1 | PDS000069287.1 |
| PDT000079292.2 | SAMEA1324634   | SAMEA1324634   | ERR134764   | GCA 001201455.1 | PDS000069287.1 |
| PDT000078978.2 | SAMEA1324671   | SAMEA1324671   | ERR134831   | GCA 001194885.1 | PDS000069284.1 |
| PDT000079205.2 | SAMEA1324627   | SAMEA1324627   | ERR134832   | GCA 001199655.1 | PDS000069284.1 |
| PDT000078989.2 | SAMEA1463435   | SAMEA1463435   | ERR302705   | GCA 001195105.1 | PDS000069281.1 |
| PDT000079059.2 | SAMEA1708703   | SAMEA1708703   | ERR237619   | GCA 001196555.1 | PDS000069281.1 |
| PDT000079008.2 | SAMEA1324617   | SAMEA1324617   | ERR134716   | GCA 001195485.1 | PDS000069277.1 |
| PDT000079147.2 | SAMEA1324631   | SAMEA1324631   | ERR134717   | GCA 001198435.1 | PDS000069277.1 |
| PDT000132780.2 | SAMEA2383913   | SAMEA2383913   | ERR554122   | GCA 900081265.1 | PDS000069279.1 |
| PDT000132951.2 | SAMEA2384398   | SAMEA2384398   | ERR554321   | GCA 900081685.1 | PDS000069279.1 |
| PDT000117259.2 | SAMEA1317420   | SAMEA1317420   | ERR111044   | GCA 900041045.1 | PDS000069433.1 |
| PDT000772839.2 | SAMEA4008581   | SAMEA4008581   | ERR1723958  | GCA 903799845.1 | PDS000069433.1 |
| PDT000772830.2 | SAMEA4008572   | SAMEA4008572   | ERR1723949  | GCA 903799705.1 | PDS000069432.1 |
| PDT000772847.2 | SAMEA4008589   | SAMEA4008589   | ERR1723966  | GCA 903799935.1 | PDS000069432.1 |
| PDT000132697.2 | SAMEA2384225   | SAMEA2384225   | ERR554149   | GCA 900081345.1 | PDS000069445.1 |
| PDT000132855.2 | SAMEA2384248   | SAMEA2384248   | ERR554172   | GCA 900081335.1 | PDS000069445.1 |
| PDT000132858.2 | SAMEA2384069   | SAMEA2384069   | ERR540273   | GCA 900080995.1 | PDS000069434.1 |
| PDT000132979.2 | SAMEA2384085   | SAMEA2384085   | ERR540289   | GCA 900081045.1 | PDS000069434.1 |
| PDT000772738.2 | SAMEA4008476   | SAMEA4008476   | ERR1723856  | GCA 903798835.1 | PDS000069440.1 |
| PDT000772768.2 | SAMEA4008508   | SAMEA4008508   | ERR1723887  | GCA 903799105.1 | PDS000069440.1 |
| PDT000772875.2 | SAMEA4008621   | SAMEA4008621   | ERR1723996  | GCA 903800215.1 | PDS000069426.1 |
| PDT000782263.2 | SAMEA4008628   | SAMEA4008628   | ERR1715331  | GCA 903800295.1 | PDS000069426.1 |
| PDT000782258.2 | SAMEA4008623   | SAMEA4008623   | ERR1723998  | GCA 903800245.1 | PDS000069425.1 |
| PDT000782266.2 | SAMEA4008631   | SAMEA4008631   | ERR1715334  | GCA 903800265.1 | PDS000069425.1 |
| PDT000772726.2 | SAMEA4008464   | SAMEA4008464   | ERR1723844  | GCA 903798715.1 | PDS000069439.1 |
| PDT000772790.2 | SAMEA4008532   | SAMEA4008532   | ERR1723909  | GCA 903799365.1 | PDS000069439.1 |
| PDT000772872.2 | SAMEA4008618   | SAMEA4008618   | ERR1723993  | GCA 903800185.1 | PDS000069427.1 |
| PDT000782265.2 | SAMEA4008630   | SAMEA4008630   | ERR1715333  | GCA 903800285.1 | PDS000069427.1 |
| PDT000170438.2 | SAMEA3449106   | SAMEA3449106   | ERR1070106  | GCA 900126765.1 | PDS000069578.1 |
| PDT000170618.2 | SAMEA3448978   | SAMEA3448978   | ERR1069831  | GCA 900125355.1 | PDS000069578.1 |
| PDT000132722.2 | SAMEA2384432   | SAMEA2384432   | ERR554355   | GCA 900081765.1 | PDS000069579.1 |
| PDT000132740.2 | SAMEA2384447   | SAMEA2384447   | ERR554370   | GCA 900081795.1 | PDS000069579.1 |
| PDT000132725.2 | SAMEA2384343   | SAMEA2384343   | ERR554267   | GCA 900081535.1 | PDS000069567.1 |
| PDT000132950.2 | SAMEA2383850   | SAMEA2383850   | ERR554060   | GCA 900081285.1 | PDS000069567.1 |
| PDT000655909.1 | SAMN13687303   | SAMN13687303   | SRR10842779 | GCA 015594105.1 | PDS000069849.1 |
| PDT000813681.1 | SAMN12776152   | SAMN12776152   | SRR10179288 | GCA 009457995.1 | PDS000069849.1 |
| PDT000619010.1 | SAMN12768915   | SAMN12768915   | SRR10127073 | GCA 015596205.1 | PDS000069861.1 |
| PDT000117472.2 | SAMEA1464472   | SAMEA1464472   | ERR134345   | GCA 900042125.1 | PDS000069856.1 |
| PDT000118840.2 | SAMEA1464628   | SAMEA1464628   | ERR134344   | GCA 900018065.1 | PDS000069856.1 |
| PDT000118926.2 | SAMEA1317535   | SAMEA1317535   | ERR107864   | GCA 900038875.1 | PDS000069845.1 |
| PDT000119318.2 | SAMEA1317562   | SAMEA1317562   | ERR107917   | GCA 900044975.1 | PDS000069845.1 |
| PDT000822236.1 | SAMEA2724992   | SAMEA2724992   | ERR375867   | GCA 015543715.1 | PDS000070384.1 |
| PDT000822097.1 | SAMN07674932   | SAMN07674932   | SRR6053689  | GCA 015544375.1 | PDS000070385.1 |
| PDT000822109.1 | SAMN07674917   | SAMN07674917   | SRR6053701  | GCA 015544155.1 | PDS000070387.1 |
| PDT000822112.1 | SAMN07674916   | SAMN07674916   | SRR6053704  | GCA 015543445.1 | PDS000070387.1 |
| PDT000822041.1 | SAMN07674930   | SAMN07674930   | SRR6053633  | GCA 015545635.1 | PDS000070386.1 |
| PDT000822043.1 | SAMN07674931   | SAMN07674931   | SRR6053635  | GCA 015545555.1 | PDS000070386.1 |
| PDT000904333.1 | SAMN09401000   | SAMN09401000   | SRR7296880  | GCA 015715975.1 | PDS000076927.1 |
| PDT000904643.1 | SAMN10435776   | SAMN10435776   | SRR8199131  | GCA 015728415.1 | PDS000076927.1 |
| PDT000904599.1 | SAMN11285049   | SAMN11285049   | SRR8810629  | GCA 015727535.1 | PDS000076924.1 |

|                |              |              |            |                 |                |
|----------------|--------------|--------------|------------|-----------------|----------------|
| PDT000904615.1 | SAMN10435802 | SAMN10435802 | SRR8199306 | GCA 015727835.1 | PDS000076924.1 |
| PDT000904339.1 | SAMN09400990 | SAMN09400990 | SRR7297472 | GCA 015716125.1 | PDS000076925.1 |
| PDT000904340.1 | SAMN09400991 | SAMN09400991 | SRR7297475 | GCA 015716135.1 | PDS000076925.1 |
| PDT000904646.1 | SAMN09401106 | SAMN09401106 | SRR7297363 | GCA 015728495.1 | PDS000076926.1 |
| PDT000904676.1 | SAMN09401077 | SAMN09401077 | SRR7297178 | GCA 015729075.1 | PDS000076926.1 |
| PDT000904542.1 | SAMN11285106 | SAMN11285106 | SRR8810058 | GCA 015726325.1 | PDS000076929.1 |
| PDT000904588.1 | SAMN11285064 | SAMN11285064 | SRR8810454 | GCA 015727315.1 | PDS000076929.1 |
| PDT000904416.1 | SAMN09400912 | SAMN09400912 | SRR7296996 | GCA 015717665.1 | PDS000076923.1 |
| PDT000904640.1 | SAMN10435774 | SAMN10435774 | SRR8199653 | GCA 015728355.1 | PDS000076923.1 |
| PDT000904638.1 | SAMN10435782 | SAMN10435782 | SRR8199064 | GCA 015728305.1 | PDS000076935.1 |
| PDT000904674.1 | SAMN09401079 | SAMN09401079 | SRR7297429 | GCA 015729045.1 | PDS000076935.1 |
| PDT000904505.1 | SAMN12220514 | SAMN12220514 | SRR9647734 | GCA 015725585.1 | PDS000076934.1 |
| PDT000904509.1 | SAMN12220509 | SAMN12220509 | SRR9647729 | GCA 015725665.1 | PDS000076934.1 |
| PDT000904496.1 | SAMN12220521 | SAMN12220521 | SRR9647548 | GCA 015725405.1 | PDS000076933.1 |
| PDT000904499.1 | SAMN12220517 | SAMN12220517 | SRR9647544 | GCA 015725475.1 | PDS000076933.1 |



**Table S4. Isolate genome sequencing data for SNP analysis.** These are the genomes which were analyzed for SNP content and cluster specificity analysis in Figures 3, 4, and Supplementary Figures 2-20.



| Table S5, continued |              |                  |               |             |            |              |            |                       |              |           |             |              |                          |              |          |              |             |                               |            |            |
|---------------------|--------------|------------------|---------------|-------------|------------|--------------|------------|-----------------------|--------------|-----------|-------------|--------------|--------------------------|--------------|----------|--------------|-------------|-------------------------------|------------|------------|
| Patient             | Day_of_study | Sodium Fusidate* | Ciprofloxacin | Clindamycin | Daptomycin | Erythromycin | Gentamicin | Inducible clindamycin | Levofloxacin | Linezolid | Minocycline | Moxifloxacin | Oxacillin\cephalosporins | Penicillin G | Rifampin | Tetracycline | Tigecycline | Trimethoprim/sulfamethoxazole | Vancomycin | Cefaroline |
| 14                  | 361          | S<=0.5           | S<=0.5        | S0.25       | S0.25      | R>=8         | S<=0.5     | S                     | S<=0.12      | S2        | S<=0.5      | S<=0.25      | R>=4                     | R>=0.5       | S<=0.5   | S<=1         | S<=0.12     | S<=10                         | S<=0.5     | S0.5       |
| 14                  | 340          | S<=0.5           | S<=0.5        | S0.25       | S0.5       | R>=8         | S<=0.5     | S                     | S<=0.12      | S2        | S<=0.5      | S<=0.25      | R>=4                     | R>=0.5       | S<=0.5   | S<=1         | S<=0.12     | S<=10                         | S<=0.5     | S0.5       |
| 15                  | 242          | R8               | S<=0.5        | S0.25       | S0.25      | S<=0.25      | R>=16      | S                     | S0.25        | S2        | S<=0.5      | S<=0.25      | R2                       | R>=0.5       | S<=0.5   | S<=1         | S<=0.12     | S<=10                         | S<=0.5     | S0.5       |
| 15                  | 221          | R8               | S<=0.5        | S0.25       | S0.25      | S<=0.25      | R>=16      | S                     | S<=0.12      | S2        | S<=0.5      | S<=0.25      | R0.5                     | R>=0.5       | S<=0.5   | S<=1         | S<=0.12     | S<=10                         | S<=0.5     | S0.25      |
| 16                  | 220          | R8               | S<=0.5        | S0.25       | S0.25      | S<=0.25      | R>=16      | S                     | S0.25        | S2        | S<=0.5      | S<=0.25      | R2                       | R>=0.5       | S<=0.5   | S<=1         | S<=0.12     | S<=10                         | S<=0.5     | S0.5       |
| 17                  | 215          | S<=0.5           | S<=0.5        | S0.25       | S0.5       | R>=8         | S<=0.5     | S                     | S0.25        | S2        | S<=0.5      | S<=0.25      | R>=4                     | R>=0.5       | S<=0.5   | S<=1         | S<=0.12     | S<=10                         | S<=0.5     | S0.5       |
| 17                  | 221          | S<=0.5           | S<=0.5        | S0.25       | S0.25      | R>=8         | S<=0.5     | S                     | S0.25        | S2        | S<=0.5      | S<=0.25      | R>=4                     | R>=0.5       | S<=0.5   | S<=1         | S<=0.12     | S<=10                         | S<=0.5     | S0.5       |
| 18                  | 375          | S<=0.5           | I2            | R0.25       | S1         | R>=8         | S<=0.5     | R                     | S1           | S2        | S<=0.5      | S<=0.25      | R>=4                     | R>=0.5       | S<=0.5   | S<=1         | S<=0.12     | S<=10                         | S1         | S0.5       |
| 19                  | 438          | S<=0.5           | R>=8          | S0.25       | S0.5       | R>=8         | S<=0.5     | S                     | R4           | S2        | S<=0.5      | I1           | R>=4                     | R>=0.5       | S<=0.5   | S<=1         | S<=0.12     | S<=10                         | S1         | S0.5       |
| 20                  | 480          | S<=0.5           | S<=0.5        | S0.25       | S0.25      | R>=8         | S<=0.5     | S                     | S<=0.12      | S2        | S<=0.5      | S<=0.25      | R>=4                     | R>=0.5       | S<=0.5   | S<=1         | S<=0.12     | S<=10                         | S1         | S0.25      |
| 21                  | 508          | S<=0.5           | S<=0.5        | S0.25       | S0.25      | R>=8         | S<=0.5     | S                     | S<=0.12      | S2        | S<=0.5      | S<=0.25      | R>=4                     | R>=0.5       | S<=0.5   | S<=1         | S<=0.12     | S<=10                         | S1         | S0.25      |
| 22                  | 550          | S<=0.5           | S<=0.5        | S0.25       | S0.25      | S<=0.25      | S<=0.5     | S                     | S0.25        | S2        | S<=0.5      | S<=0.25      | R>=4                     | R>=0.5       | S<=0.5   | S<=1         | S<=0.12     | S<=10                         | S1         | S0.25      |

**Table S5. Antibiotic resistance levels.** Blank cells were not tested. “R” stands for a call of resistant, “S” stands for a call of susceptible, and “I” stands for intermediate resistance, determinations which were made according to CLSI guidelines. Minimum inhibitory concentrations are given in µg/ml and were determined by VITEK 2 except for sodium fusidate (\*), for which the minimum inhibitory concentration was determined by broth microdilution.
